# Supplementary material for: A single-cell survey of Drosophila blood
Source: eLife. 2020 May 12;9:e54818. doi: 10.7554/eLife.54818 (PMC7237219; doi:10.7554/eLife.54818)
Supplement: Figure 2—source data 1. [file elife-54818-fig2-data1.xlsx]

## Sheet: Fig. 2D
Cluster	injured_indrop_PC1	injured_indrop_PC2	injured_tenx_B2	injured_tenx_B4	UNinjured_indrop_UC1	UNinjured_indrop_UC2	UNinjured_tenx_B1	UNinjured_tenx_B3	WASP96hr_dropseq_PI24CIRC1	WASP96hr_dropseq_PI24CIRC2	WASP96hr_dropseq_PI24CIRC3		Wounded	Unwounded	Wasp inf. 24h	Original Cluster ID	Annotated clusters
0	429	1331	1157	346	504	432	503	107	19	228	1740		3263	1546	1987	0	PM1
2	232	358	144	531	359	2	18	225	19	58	554		1265	604	631	2	PM2
3	315	226	208	198	120	10	68	113	69	334	332		947	311	735	3	LM1
4	246	156	218	144	194	1	52	68	1	652	78		764	315	731	4	PM3
5	32	147	24	347	290	2	0	85	3	74	457		550	377	534	5	PM4
6	105	132	128	113	189	3	16	80	6	69	363		478	288	438	6	PM5
7	119	85	74	78	42	22	51	10	0	47	115		356	125	162	7	CC2
8	27	123	96	99	67	8	17	49	1	9	134		345	141	144	8	PM8
9	89	61	129	43	142	0	17	12	2	5	12		322	171	19	9	PM9
10	56	92	0	7	0	0	0	3	12	311	19		155	3	342	10	PM6
11	13	111	47	23	0	0	2	42	12	159	12		194	44	183	11	PM7
12	53	30	30	8	23	3	0	0	8	12	105		121	26	125	12	LM2
13	52	13	49	22	65	0	12	9	0	0	21		136	86	21	13	PM10
15	1	27	41	23	6	9	9	2	0	1	35		92	26	36	15	CC1
16	13	3	29	14	42	0	4	1	3	12	27		59	47	42	16	PM11
17	0	0	4	127	0	0	0	0	0	0	0		131	0	0	17	PM12
18	0	0	0	0	0	0	0	0	26	5	9		0	0	40	18	non-hemo
SUM of cells	1782	2895	2378	2123	2043	492	769	806	181	1976	4013		9178	4110	6170		19458	Total number of cells
													% of cells	% of cells	% of cells
												PM1	35.5524	37.6156	32.2042
												PM2	13.783	14.6959	10.2269
												PM3	8.32425	7.66423	11.8476		Values used for the figure 2D
												PM4	5.99259	9.17275	8.65478
												PM5	5.20811	7.0073	7.09887
												PM6	1.68882	0.0729927	5.54295
												PM7	2.11375	1.07056	2.96596
												PM8	3.75899	3.43066	2.33387
												PM9	3.50839	4.16058	0.307942
												PM10	1.4818	2.09246	0.340357
												PM11	0.642842	1.14355	0.680713
												PM12	1.42733	0	0
												CC1	1.0024	0.632603	0.583468
												CC2	3.87884	3.04136	2.62561
												LM1	10.3182	7.56691	11.9125
												LM2	1.31837	0.632603	2.02593
												non-hemo	0	0	0.648298
