# Supplementary material for: A single-cell survey of Drosophila blood
Source: eLife. 2020 May 12;9:e54818. doi: 10.7554/eLife.54818 (PMC7237219; doi:10.7554/eLife.54818)
Supplement: Figure 4—source data 1. [file elife-54818-fig4-data1.xlsx]

## Sheet: Figure 4B
Cluster	injured_indrop_PC1	injured_indrop_PC2	injured_tenx_B2	injured_tenx_B4	UNinjured_indrop_UC1	UNinjured_indrop_UC2	UNinjured_tenx_B1	UNinjured_tenx_B3	WASP96hr_dropseq_PI24CIRC2	WASP96hr_dropseq_PI24CIRC3
0	107	96	60	43	37	25	20	5	30	144
1	13	16	55	58	11	6	40	7	18	6
	120	112	115	101	48	31	60	12	48	150
	89.1667	85.7143	52.1739	42.5743	77.0833	80.6452	33.3333	41.6667	62.5	96
	10.8333	14.2857	47.8261	57.4257	22.9167	19.3548	66.6667	58.3333	37.5	4
	Wounded	Unwounded	Wasp inf. 24h		Wounded	Unwounded	Wasp inf. 24h
CC sum	448	151	210	PPO1 low sum	306	87	179
				PPO1 high sum	142	64	31
% of low	68.3036	57.6159	85.2381
% of high	31.6964	42.3841	14.7619
