# Supplementary material for: A single-cell survey of Drosophila blood
Source: eLife. 2020 May 12;9:e54818. doi: 10.7554/eLife.54818 (PMC7237219; doi:10.7554/eLife.54818)
Supplement: Figure 4—source data 2. [file elife-54818-fig4-data2.xlsx]

## Sheet: NEW data_summing_1024_1024
Lz							PPO1									Lz							PPO1									Lz							PPO1									Lz
cell#	sample	area	mean int	int density	raw int den		cell#	sample	area	mean int	int density	raw int den	int/area			cell#	sample	area	mean int	int density	raw int den		cell#	sample	area	mean int	int density	raw int den				cell#	sample	area	mean int	int density	raw int den		cell#	sample	area	mean int	int density	raw int den				cell#	sample
1	SUM_Lz14_BcF6-10000.tif:0001-0155	55.32	1974.45	109226	633799		1	SUM_Lz14_BcF6-10002-1.tif:0001-0155	55.32	1762.79	97517	565856	31.8653			1	SUM_Lz14_BcF6-20000.tif:0001-0255	79.619	3566.04	283925	1647512		1	SUM_Lz14_BcF6-20002-1.tif:0001-0255	79.619	3690.55	293838	1705036				1	SUM_Lz14_BcF6-30000.tif:0001-0120	149.242	5844.04	872178	5060936		1	SUM_Lz14_BcF6-30002.tif:0001-0120	149.242	2857.05	426394	2474210				1	SUM_Lz14_BcF6-150000.tif:0001-0032
2	SUM_Lz14_BcF6-10000.tif:0002-0196	172.852	5387.84	931300	5404000		2	SUM_Lz14_BcF6-10002-1.tif:0002-0196	172.852	2756.84	476526	2765109	15.9491			2	SUM_Lz14_BcF6-20000.tif:0002-0309	59.283	4273.44	253344	1470063		2	SUM_Lz14_BcF6-20002-1.tif:0002-0309	59.283	2962.58	175632	1019129				2	SUM_Lz14_BcF6-30000.tif:0002-0118	66.349	4909.52	325743	1890167		2	SUM_Lz14_BcF6-30002.tif:0002-0118	66.349	2361.15	156660	909044				2	SUM_Lz14_BcF6-150000.tif:0002-0054
3	SUM_Lz14_BcF6-10000.tif:0003-0237	104.952	1591.72	167055	969358		3	SUM_Lz14_BcF6-10002-1.tif:0003-0237	104.952	2054.11	215584	1250954	19.5719			3	SUM_Lz14_BcF6-20000.tif:0003-0353	80.136	8888.56	712293	4133180		3	SUM_Lz14_BcF6-20002-1.tif:0003-0353	80.136	3216.96	257794	1495887				3	SUM_Lz14_BcF6-30000.tif:0003-0147	60.834	4304.61	261869	1519529		3	SUM_Lz14_BcF6-30002.tif:0003-0147	60.834	2467.88	150132	871162				3	SUM_Lz14_BcF6-150000.tif:0003-0145
4	SUM_Lz14_BcF6-10000.tif:0004-0257	198.703	3538.28	703066	4079637		4	SUM_Lz14_BcF6-10002-1.tif:0004-0257	198.703	2214.49	440026	2553312	11.1447			4	SUM_Lz14_BcF6-20000.tif:0004-0451	65.66	5295.7	347714	2017661		4	SUM_Lz14_BcF6-20002-1.tif:0004-0451	65.66	3512.51	230631	1338266				4	SUM_Lz14_BcF6-30000.tif:0004-0165	95.129	4357.37	414513	2405268		4	SUM_Lz14_BcF6-30002.tif:0004-0165	95.129	2792.89	265685	1541676				4	SUM_Lz14_BcF6-150000.tif:0004-0157
5	SUM_Lz14_BcF6-10000.tif:0005-0343	155.102	3411.42	529117	3070278		5	SUM_Lz14_BcF6-10002-1.tif:0005-0343	155.102	2310.11	358302	2079098	14.8941			5	SUM_Lz14_BcF6-20000.tif:0005-0467	54.458	2641.97	143876	834862		5	SUM_Lz14_BcF6-20002-1.tif:0005-0467	54.458	2662.84	145013	841459				5	SUM_Lz14_BcF6-30000.tif:0005-0195	113.052	4913.66	555499	3223359		5	SUM_Lz14_BcF6-30002.tif:0005-0195	113.052	2442.32	276109	1602162				5	SUM_Lz14_BcF6-150000.tif:0005-0173
6	SUM_Lz14_BcF6-10000.tif:0006-0386	134.422	7069.31	950267	5514059		6	SUM_Lz14_BcF6-10002-1.tif:0006-0386	134.422	3670.07	493337	2862656	27.3026			6	SUM_Lz14_BcF6-20000.tif:0006-0563	120.29	5188.01	624066	3621230		6	SUM_Lz14_BcF6-20002-1.tif:0006-0563	120.29	3358.34	403975	2344119				6	SUM_Lz14_BcF6-30000.tif:0006-0192	58.594	7512.08	440163	2554108		6	SUM_Lz14_BcF6-30002.tif:0006-0192	58.594	2544.23	149077	865039	High	0.297872		6	SUM_Lz14_BcF6-150000.tif:0007-0215
7	SUM_Lz14_BcF6-10000.tif:0009-0569	56.871	1544.09	87813.3	509549		7	SUM_Lz14_BcF6-10002-1.tif:0009-0569	56.871	1765.52	100407	582623	31.0444	0.32		7	SUM_Lz14_BcF6-20000.tif:0007-0599	56.009	4690.13	262689	1524291		7	SUM_Lz14_BcF6-20002-1.tif:0007-0599	56.009	3302.66	184979	1073366	High	0.468085		7	SUM_Lz14_BcF6-30000.tif:0007-0219	140.626	6114.06	859794	4989074		7	SUM_Lz14_BcF6-30002.tif:0007-0219	140.626	2981.7	419303	2433067	Low	0.702128		7	SUM_Lz14_BcF6-150000.tif:0008-0215
8	SUM_Lz14_BcF6-10000.tif:0010-0583	95.646	3578.46	342266	1986044		8	SUM_Lz14_BcF6-10002-1.tif:0010-0583	95.646	2208.05	211191	1225468	23.0856	0.68		8	SUM_Lz14_BcF6-20000.tif:0008-0635	147.347	2354.8	346972	2013353		8	SUM_Lz14_BcF6-20002-1.tif:0008-0635	147.347	4277.08	630214	3656903	Low	0.531915		8	SUM_Lz14_BcF6-30000.tif:0008-0261	77.723	7598.52	590581	3426931		8	SUM_Lz14_BcF6-30002.tif:0008-0261	77.723	2405.03	186926	1084667				8	SUM_Lz14_BcF6-150000.tif:0009-0220
9	SUM_Lz14_BcF6-10000.tif:0011-0603	99.093	2431.73	240967	1398247		9	SUM_Lz14_BcF6-10002-1.tif:0011-0603	99.093	1718.6	170301	988194	17.3433			9	SUM_Lz14_BcF6-20000.tif:0009-0676	85.134	4278.05	364206	2113357		9	SUM_Lz14_BcF6-20002-1.tif:0009-0676	85.134	3028.8	257853	1496226				9	SUM_Lz14_BcF6-30000.tif:0009-0381	177.85	7275.14	1.29388e+06	7507947		9	SUM_Lz14_BcF6-30002.tif:0009-0381	177.85	2837.6	504667	2928399				9	SUM_Lz14_BcF6-150000.tif:0010-0226
10	SUM_Lz14_BcF6-10000.tif:0012-0629	88.58	4392.71	389108	2257854		10	SUM_Lz14_BcF6-10002-1.tif:0012-0629	88.58	2387.16	211455	1227000	26.9492			10	SUM_Lz14_BcF6-20000.tif:0010-0746	144.934	4318.56	625907	3631911		10	SUM_Lz14_BcF6-20002-1.tif:0010-0746	144.934	2637.93	382325	2218495				10	SUM_Lz14_BcF6-30000.tif:0010-0405	141.143	5003.51	706209	4097877		10	SUM_Lz14_BcF6-30002.tif:0010-0405	141.143	4600.13	649275	3767510				10	SUM_Lz14_BcF6-150000.tif:0011-0261
11	SUM_Lz14_BcF6-10000.tif:0013-0635	103.229	3914.03	404041	2344503		11	SUM_Lz14_BcF6-10002-1.tif:0013-0635	103.229	2272.28	234565	1361098	22.0121			11	SUM_Lz14_BcF6-20000.tif:0011-0768	113.914	5218.99	594515	3449756		11	SUM_Lz14_BcF6-20002-1.tif:0011-0768	113.914	3180.55	362308	2102342				11	SUM_Lz14_BcF6-30000.tif:0011-0530	79.447	6993.34	555597	3223930		11	SUM_Lz14_BcF6-30002.tif:0011-0530	79.447	2224.54	176732	1025514				11	SUM_Lz14_BcF6-150000.tif:0012-0261
12	SUM_Lz14_BcF6-10000.tif:0014-0643	94.957	4049.36	384514	2231195		12	SUM_Lz14_BcF6-10002-1.tif:0014-0643	94.957	2535.88	240799	1397270	26.7056			12	SUM_Lz14_BcF6-20000.tif:0012-0798	77.723	4934.11	383495	2225282		12	SUM_Lz14_BcF6-20002-1.tif:0012-0798	77.723	3311	257342	1493263				12	SUM_Lz14_BcF6-30000.tif:0012-0571	124.254	7356.49	914072	5304033		12	SUM_Lz14_BcF6-30002.tif:0012-0571	124.254	3060.45	380272	2206584				12	SUM_Lz14_BcF6-150000.tif:0013-0268
13	SUM_Lz14_BcF6-10000.tif:0015-0644	110.812	8267.4	916124	5315940		13	SUM_Lz14_BcF6-10002-1.tif:0015-0644	110.812	5334.6	591136	3430148	48.141			13	SUM_Lz14_BcF6-20000.tif:0013-0799	78.24	4993.58	390699	2267084		13	SUM_Lz14_BcF6-20002-1.tif:0013-0799	78.24	3268.59	255735	1483940				13	SUM_Lz14_BcF6-30000.tif:0014-0894	75.655	439.551	33254.3	192963		13	SUM_Lz14_BcF6-30002.tif:0014-0894	75.655	2158.94	163335	947774				13	SUM_Lz14_BcF6-150000.tif:0014-0266
14	SUM_Lz14_BcF6-10000.tif:0016-0649	55.492	4221.76	234274	1359406		14	SUM_Lz14_BcF6-10002-1.tif:0016-0649	55.492	2522.16	139960	812137	45.451			14	SUM_Lz14_BcF6-20000.tif:0014-0856	71.002	4018.92	285352	1655794		14	SUM_Lz14_BcF6-20002-1.tif:0014-0856	71.002	2891.63	205312	1191351				14	SUM_Lz14_BcF6-30000.tif:0015-0915	71.864	3353.54	240999	1398428		14	SUM_Lz14_BcF6-30002.tif:0015-0915	71.864	2924.15	210141	1219371				14	SUM_Lz14_BcF6-150000.tif:0015-0281
15	SUM_Lz14_BcF6-10000.tif:0017-0671	61.524	4142.16	254841	1478753		15	SUM_Lz14_BcF6-10002-1.tif:0017-0671	61.524	2134.85	131344	762141	34.6995			15	SUM_Lz14_BcF6-20000.tif:0015-0900	104.091	4292.86	446846	2592885		15	SUM_Lz14_BcF6-20002-1.tif:0015-0900	104.091	2876.31	299397	1737292				15	SUM_Lz14_BcF6-30000.tif:0016-0940	123.047	3922.83	482694	2800900		15	SUM_Lz14_BcF6-30002.tif:0016-0940	123.047	2257.69	277803	1611989				15	SUM_Lz14_BcF6-150000.tif:0016-0278
16	SUM_Lz14_BcF6-10000.tif:0018-0690	169.923	6539.32	1.11118e+06	6447773		16	SUM_Lz14_BcF6-10002-1.tif:0018-0690	169.923	4147.28	704718	4089223	24.4068			16	SUM_Lz14_BcF6-20000.tif:0016-0973	79.619	6081.07	484168	2809455		16	SUM_Lz14_BcF6-20002-1.tif:0016-0973	79.619	3954.25	314833	1826862				16	SUM_Lz14_BcF6-30000.tif:0017-0988	149.759	3957.15	592620	3438762		16	SUM_Lz14_BcF6-30002.tif:0017-0988	149.759	2340.64	350533	2034018				16	SUM_Lz14_BcF6-150000.tif:0017-0294
17	SUM_Lz14_BcF6-10000.tif:0019-0710	75.138	2517.35	189149	1097565		17	SUM_Lz14_BcF6-10002-1.tif:0019-0710	75.138	1787.38	134301	779300	23.788			17	SUM_Lz14_BcF6-20000.tif:0961-0466	101.333	2970.46	301006	1746631		17	SUM_Lz14_BcF6-20002-1.tif:0961-0466	101.333	1828.6	185298	1075216				17	SUM_Lz14_BcF6-30000.tif:0678-0566	170.612	5294.3	903271	5241357		17	SUM_Lz14_BcF6-30002.tif:0678-0566	170.612	2852.9	486739	2824370				17	SUM_Lz14_BcF6-150000.tif:0018-0302
18	SUM_Lz14_BcF6-10000.tif:0020-0721	74.104	5073.86	375994	2181759		18	SUM_Lz14_BcF6-10002-1.tif:0020-0721	74.104	2906.28	215368	1249702	39.219			18	SUM_Lz14_BcF6-20000.tif:0933-0631	62.041	345.569	21439.4	124405		18	SUM_Lz14_BcF6-20002-1.tif:0933-0631	62.041	1588.87	98574.4	571992				18	SUM_Lz14_BcF6-30000.tif:0361-0574	124.081	12277.5	1.52342e+06	8839833		18	SUM_Lz14_BcF6-30002.tif:0361-0574	124.081	5758.67	714545	4146245				18	SUM_Lz14_BcF6-150000.tif:0019-0352
19	SUM_Lz14_BcF6-10000.tif:0021-0742	74.277	3308.55	245748	1425986		19	SUM_Lz14_BcF6-10002-1.tif:0021-0742	74.277	1999.81	148539	861919	26.9237			19	SUM_Lz14_BcF6-20000.tif:0673-0436	125.46	2537.81	318394	1847523		19	SUM_Lz14_BcF6-20002-1.tif:0673-0436	125.46	1792.95	224944	1305270				19	SUM_Lz14_BcF6-30000.tif:0326-0564	103.057	7811.44	805020	4671243		19	SUM_Lz14_BcF6-30002.tif:0326-0564	103.057	2963.95	305455	1772445				19	SUM_Lz14_BcF6-150000.tif:0020-0353
20	SUM_Lz14_BcF6-10000.tif:0022-0754	71.519	4386.84	313743	1820537		20	SUM_Lz14_BcF6-10002-1.tif:0022-0754	71.519	1970.4	140922	817718	27.5508			20	SUM_Lz14_BcF6-20000.tif:0439-0511	170.612	1677.52	286206	1660749		20	SUM_Lz14_BcF6-20002-1.tif:0439-0511	170.612	1358.54	231783	1344954				20	SUM_Lz14_BcF6-30000.tif:0348-0501	143.383	3865.28	554216	3215917		20	SUM_Lz14_BcF6-30002.tif:0348-0501	143.383	1623.08	232722	1350402				20	SUM_Lz14_BcF6-150000.tif:0021-0355
21	SUM_Lz14_BcF6-10000.tif:0023-0758	80.136	2634.05	211082	1224831		21	SUM_Lz14_BcF6-10002-1.tif:0023-0758	80.136	1775.45	142277	825583	22.1554			21	SUM_Lz14_BcF6-20000.tif:0490-0505	266.775	2282.46	608904	3533251		21	SUM_Lz14_BcF6-20002-1.tif:0490-0505	266.775	1119.23	298582	1732565				21	SUM_Lz14_BcF6-30000.tif:0243-0559	107.537	6494.91	698445	4052823		21	SUM_Lz14_BcF6-30002.tif:0243-0559	107.537	3919.31	421472	2445651				21	SUM_Lz14_BcF6-150000.tif:0022-0366
22	SUM_Lz14_BcF6-10000.tif:0024-0763	124.598	4129.6	514542	2985704		22	SUM_Lz14_BcF6-10002-1.tif:0024-0763	124.598	2734.22	340680	1976842	21.9443			22	SUM_Lz14_BcF6-20000.tif:0651-0313	261.433	1389.28	363203	2107539		22	SUM_Lz14_BcF6-20002-1.tif:0651-0313	261.433	833.244	217837	1264031				22	SUM_Lz14_BcF6-30000.tif:0056-0562	186.122	2926.1	544612	3160188		22	SUM_Lz14_BcF6-30002.tif:0056-0562	186.122	2017.73	375544	2179146				22	SUM_Lz14_BcF6-150000.tif:0023-0369
23	SUM_Lz14_BcF6-10000.tif:0025-0769	57.043	242.616	13839.6	80306		23	SUM_Lz14_BcF6-10002-1.tif:0025-0769	57.043	1577.43	89981.1	522128	27.6533			23	SUM_Lz14_BcF6-20000.tif:0926-0444	326.058	1759.69	573760	3329325		23	SUM_Lz14_BcF6-20002-1.tif:0926-0444	326.058	1146.74	373905	2169635				23	SUM_Lz14_BcF6-30000.tif:0120-0347	155.102	3565.08	552950	3208568		23	SUM_Lz14_BcF6-30002.tif:0120-0347	155.102	1392.06	215912	1252858				23	SUM_Lz14_BcF6-150000.tif:0024-0379
24	SUM_Lz14_BcF6-10000.tif:0026-0772	118.911	4877.12	579945	3365214		24	SUM_Lz14_BcF6-10002-1.tif:0026-0772	118.911	3218.79	382751	2220968	27.0689			24	SUM_Lz14_BcF6-20000.tif:0747-0505	134.939	2908.56	392478	2277406		24	SUM_Lz14_BcF6-20002-1.tif:0747-0505	134.939	1488.31	200831	1165350				24	SUM_Lz14_BcF6-30000.tif:0145-0361	86.857	2492.13	216459	1256035		24	SUM_Lz14_BcF6-30002.tif:0145-0361	86.857	1114.28	96783.4	561599				24	SUM_Lz14_BcF6-150000.tif:0025-0382
25	SUM_Lz14_BcF6-10000.tif:0027-0771	73.587	4487.09	330193	1915989		25	SUM_Lz14_BcF6-10002-1.tif:0027-0771	73.587	2897.58	213224	1237265	39.3762			25	SUM_Lz14_BcF6-20000.tif:0775-0516	164.925	2836.23	467764	2714268		25	SUM_Lz14_BcF6-20002-1.tif:0775-0516	164.925	1240.76	204633	1187411				25	SUM_Lz14_BcF6-30000.tif:0410-0403	150.621	2261.46	340624	1976516		25	SUM_Lz14_BcF6-30002.tif:0410-0403	150.621	1078.89	162503	942947				25	SUM_Lz14_BcF6-150000.tif:0027-0410
26	SUM_Lz14_BcF6-10000.tif:0028-0791	65.66	3455	226854	1316355		26	SUM_Lz14_BcF6-10002-1.tif:0028-0791	65.66	2037.24	133765	776190	31.0272			26	SUM_Lz14_BcF6-20000.tif:0488-0664	124.943	3368.69	420895	2442303		26	SUM_Lz14_BcF6-20002-1.tif:0488-0664	124.943	2220.29	277410	1609711				26	SUM_Lz14_BcF6-30000.tif:0469-0440	130.803	2864.59	374695	2174221		26	SUM_Lz14_BcF6-30002.tif:0469-0440	130.803	1282.9	167807	973722				26	SUM_Lz14_BcF6-150000.tif:0028-0414
27	SUM_Lz14_BcF6-10000.tif:0029-0797	113.224	5146.57	582716	3381294		27	SUM_Lz14_BcF6-10002-1.tif:0029-0797	113.224	3218.32	364392	2114434	28.4243			27	SUM_Lz14_BcF6-20000.tif:0290-0559	199.047	1464.64	291533	1691662		27	SUM_Lz14_BcF6-20002-1.tif:0290-0559	199.047	865.946	172364	1000168				27	SUM_Lz14_BcF6-30000.tif:0482-0468	126.839	1842.59	233712	1356149		27	SUM_Lz14_BcF6-30002.tif:0482-0468	126.839	926.579	117526	681962				27	SUM_Lz14_BcF6-150000.tif:0029-0423
28	SUM_Lz14_BcF6-10000.tif:0030-0810	121.324	6069.52	736379	4272942		28	SUM_Lz14_BcF6-10002-1.tif:0030-0810	121.324	3678.27	446263	2589505	30.3178			28	SUM_Lz14_BcF6-20000.tif:0282-0506	144.934	2459.6	356480	2068524		28	SUM_Lz14_BcF6-20002-1.tif:0282-0506	144.934	1366.53	198057	1149255				28	SUM_Lz14_BcF6-30000.tif:0880-0563	159.41	2545.32	405749	2354417		28	SUM_Lz14_BcF6-30002.tif:0880-0563	159.41	1243.94	198297	1150645				28	SUM_Lz14_BcF6-150000.tif:0030-0422
29	SUM_Lz14_BcF6-10000.tif:0031-0854	105.125	5522.11	580509	3368486		29	SUM_Lz14_BcF6-10002-1.tif:0031-0854	105.125	3011.53	316586	1837036	28.6472			29	SUM_Lz14_BcF6-20000.tif:0242-0487	134.422	1302.32	175060	1015813		29	SUM_Lz14_BcF6-20002-1.tif:0242-0487	134.422	793.846	106710	619200				29	SUM_Lz14_BcF6-30000.tif:0950-0508	170.957	1992.31	340599	1976371		29	SUM_Lz14_BcF6-30002.tif:0950-0508	170.957	875.013	149589	868013				29	SUM_Lz14_BcF6-150000.tif:0032-0446
30	SUM_Lz14_BcF6-10000.tif:0032-0865	147.002	5033.22	739893	4293333		30	SUM_Lz14_BcF6-10002-1.tif:0032-0865	147.002	2793.01	410579	2382440	18.9998			30	SUM_Lz14_BcF6-20000.tif:0237-0616	138.902	1536.15	213375	1238141		30	SUM_Lz14_BcF6-20002-1.tif:0237-0616	138.902	1426.92	198202	1150096				30	SUM_Lz14_BcF6-30000.tif:0962-0539	101.333	3112.52	315402	1830163		30	SUM_Lz14_BcF6-30002.tif:0962-0539	101.333	1361.36	137951	800478				30	SUM_Lz14_BcF6-150000.tif:0033-0447
31	SUM_Lz14_BcF6-10000.tif:0033-0886	115.982	5360.36	621704	3607525		31	SUM_Lz14_BcF6-10002-1.tif:0033-0886	115.982	2898.78	336205	1950877	24.9933			31	SUM_Lz14_BcF6-20000.tif:0455-0432	153.551	2924.6	449075	2605819		31	SUM_Lz14_BcF6-20002-1.tif:0455-0432	153.551	2200.41	337875	1960569				31	SUM_Lz14_BcF6-30000.tif:0560-0443	110.984	1534.19	170270	988018		31	SUM_Lz14_BcF6-30002.tif:0560-0443	110.984	750.14	83253.5	483090				31	SUM_Lz14_BcF6-150000.tif:0034-0473
32	SUM_Lz14_BcF6-10000.tif:0034-0917	64.453	3154.43	203314	1179756		32	SUM_Lz14_BcF6-10002-1.tif:0034-0917	64.453	1978.21	127502	739849	30.6922			32	SUM_Lz14_BcF6-20000.tif:0356-0433	222.657	5298.92	1.17984e+06	6846206		32	SUM_Lz14_BcF6-20002-1.tif:0356-0433	222.657	3424.72	762539	4424739				32	SUM_Lz14_BcF6-30000.tif:0162-0481	61.524	2338.74	143888	834930		32	SUM_Lz14_BcF6-30002.tif:0162-0481	61.524	1276.13	78512	455577				32	SUM_Lz14_BcF6-150000.tif:0035-0485
33	SUM_Lz14_BcF6-10000.tif:0847-0552	144.934	258.838	37514.5	217683		33	SUM_Lz14_BcF6-10002-1.tif:0847-0552	144.934	589.246	85401.8	495556	4.06562			33	SUM_Lz14_BcF6-20000.tif:0848-0537	282.285	5748.51	1.62272e+06	9416055		33	SUM_Lz14_BcF6-20002-1.tif:0848-0537	282.285	3676.62	1.03786e+06	6022304				33	SUM_Lz14_BcF6-30000.tif:0118-0407	110.984	1796.73	199409	1157096		33	SUM_Lz14_BcF6-30002.tif:0118-0407	110.984	872.332	96814.9	561782				33	SUM_Lz14_BcF6-150000.tif:0036-0502
34	SUM_Lz14_BcF6-10000.tif:0668-0444	90.476	6069.73	549166	3186610		34	SUM_Lz14_BcF6-10002-1.tif:0668-0444	90.476	3341.15	302294	1754105	36.9286			34	SUM_Lz14_BcF6-20000.tif:0859-0510	58.939	4808.47	283405	1644498		34	SUM_Lz14_BcF6-20002-1.tif:0859-0510	58.939	2412.28	142176	824998				34	SUM_Lz14_BcF6-30000.tif:0043-0484	129.252	2752.33	355743	2064249		34	SUM_Lz14_BcF6-30002.tif:0043-0484	129.252	1282.79	165803	962095				34	SUM_Lz14_BcF6-150000.tif:0037-0501
35	SUM_Lz14_BcF6-10000.tif:0665-0471	119.945	6723.74	806482	4679725		35	SUM_Lz14_BcF6-10002-1.tif:0665-0471	119.945	4101.18	491918	2854422	34.1922			35	SUM_Lz14_BcF6-20000.tif:0905-0546	199.047	7206.27	1.43439e+06	8323240		35	SUM_Lz14_BcF6-20002-1.tif:0905-0546	199.047	4859.52	967274	5612744				35	SUM_Lz14_BcF6-30000.tif:0212-0511	110.984	6506.6	722128	4190249		35	SUM_Lz14_BcF6-30002.tif:0212-0511	110.984	2895.17	321317	1864488				35	SUM_Lz14_BcF6-150000.tif:0038-0518
36	SUM_Lz14_BcF6-10000.tif:0687-0492	81.859	4785.66	391751	2273191		36	SUM_Lz14_BcF6-10002-1.tif:0687-0492	81.859	1715.02	140390	814634	20.9509			36	SUM_Lz14_BcF6-20000.tif:0924-0577	125.46	4045.09	507498	2944828		36	SUM_Lz14_BcF6-20002-1.tif:0924-0577	125.46	2070.21	259728	1507110				36	SUM_Lz14_BcF6-30000.tif:0272-0508	163.719	5820.25	952883	5529235		36	SUM_Lz14_BcF6-30002.tif:0272-0508	163.719	3411.52	558529	3240945				36	SUM_Lz14_BcF6-150000.tif:0039-0551
37	SUM_Lz14_BcF6-10000.tif:0718-0440	173.714	3400.28	590677	3427486		37	SUM_Lz14_BcF6-10002-1.tif:0718-0440	173.714	2142.61	372202	2159754	12.3341			37	SUM_Lz14_BcF6-20000.tif:0869-0641	154.412	4409.42	680870	3950841		37	SUM_Lz14_BcF6-20002-1.tif:0869-0641	154.412	2743.76	423671	2458410				37	SUM_Lz14_BcF6-30000.tif:0369-0546	90.993	5294.33	481747	2795406		37	SUM_Lz14_BcF6-30002.tif:0369-0546	90.993	3933.22	357896	2076743				37	SUM_Lz14_BcF6-150000.tif:0040-0553
38	SUM_Lz14_BcF6-10000.tif:0717-0494	95.129	4627.95	440253	2554630		38	SUM_Lz14_BcF6-10002-1.tif:0717-0494	95.129	2536.21	241267	1399986	26.6607			38	SUM_Lz14_BcF6-20000.tif:0823-0633	103.057	4166.34	429369	2491471		38	SUM_Lz14_BcF6-20002-1.tif:0823-0633	103.057	2419.82	249379	1447054				38	SUM_Lz14_BcF6-30000.tif:0425-0510	158.204	3282.74	519342	3013557		38	SUM_Lz14_BcF6-30002.tif:0425-0510	158.204	1550.99	245373	1423811				38	SUM_Lz14_BcF6-150000.tif:0041-0570
39	SUM_Lz14_BcF6-10000.tif:0737-0474	57.905	3160.47	183006	1061917		39	SUM_Lz14_BcF6-10002-1.tif:0737-0474	57.905	1955.3	113221	656979	33.7673			39	SUM_Lz14_BcF6-20000.tif:0796-0631	135.111	3831.44	517669	3003849		39	SUM_Lz14_BcF6-20002-1.tif:0796-0631	135.111	2162.89	292230	1695708				39	SUM_Lz14_BcF6-30000.tif:0387-0503	139.592	2308.49	322246	1869879		39	SUM_Lz14_BcF6-30002.tif:0387-0503	139.592	1144.73	159794	927228				39	SUM_Lz14_BcF6-150000.tif:0042-0577
40	SUM_Lz14_BcF6-10000.tif:0931-0494	286.938	4420.13	1.26831e+06	7359521		40	SUM_Lz14_BcF6-10002-1.tif:0931-0494	286.938	2836.49	813897	4722750	9.88536			40	SUM_Lz14_BcF6-20000.tif:0622-0546	156.825	4345.41	681470	3954328		40	SUM_Lz14_BcF6-20002-1.tif:0622-0546	156.825	2883.94	452275	2624388				40	SUM_Lz14_BcF6-30000.tif:0403-0465	144.762	981.951	142149	824839		40	SUM_Lz14_BcF6-30002.tif:0403-0465	144.762	325.411	47107	273345				40	SUM_Lz14_BcF6-150000.tif:0043-0599
41	SUM_Lz14_BcF6-10000.tif:0711-0552	125.46	2301.57	288755	1675543		41	SUM_Lz14_BcF6-10002-1.tif:0711-0552	125.46	1324.38	166157	964147	10.5562			41	SUM_Lz14_BcF6-20000.tif:0581-0437	211.111	4168.72	880061	5106677		41	SUM_Lz14_BcF6-20002-1.tif:0581-0437	211.111	2266.28	478436	2776194				41	SUM_Lz14_BcF6-30000.tif:0452-0419	116.326	1967.12	228828	1327808		41	SUM_Lz14_BcF6-30002.tif:0452-0419	116.326	720.553	83819.3	486373				41	SUM_Lz14_BcF6-150000.tif:0044-0620
42	SUM_Lz14_BcF6-10000.tif:0693-0530	75.311	1144.05	86158.9	499949		42	SUM_Lz14_BcF6-10002-1.tif:0693-0530	75.311	914.789	68893.3	399763	12.1468			42	SUM_Lz14_BcF6-20000.tif:0625-0451	231.619	4352.21	1.00805e+06	5849372		42	SUM_Lz14_BcF6-20002-1.tif:0625-0451	231.619	2339.37	541842	3144116				42	SUM_Lz14_BcF6-30000.tif:0487-0415	120.979	3025.41	366012	2123834		42	SUM_Lz14_BcF6-30002.tif:0487-0415	120.979	587.115	71028.9	412155				42	SUM_Lz14_BcF6-150000.tif:0045-0623
43	SUM_Lz14_BcF6-10000.tif:0690-0557	104.952	1360.22	142758	828372		43	SUM_Lz14_BcF6-10002-1.tif:0690-0557	104.952	900.724	94533	548541	8.58225			43	SUM_Lz14_BcF6-20000.tif:0576-0491	93.061	6835.38	636108	3691105		43	SUM_Lz14_BcF6-20002-1.tif:0576-0491	93.061	3677.68	342249	1985947				43	SUM_Lz14_BcF6-30000.tif:0587-0438	116.326	952.45	110795	642904		43	SUM_Lz14_BcF6-30002.tif:0587-0438	116.326	611.265	71106.3	412604				43	SUM_Lz14_BcF6-150000.tif:0046-0626
44	SUM_Lz14_BcF6-10000.tif:0543-0524	103.057	1253.24	129155	749439		44	SUM_Lz14_BcF6-10002-1.tif:0543-0524	103.057	1072.96	110575	641628	10.4113			44	SUM_Lz14_BcF6-20000.tif:0550-0441	112.19	2338.5	262357	1522362		44	SUM_Lz14_BcF6-20002-1.tif:0550-0441	112.19	1402.51	157348	913035				44	SUM_Lz14_BcF6-30000.tif:0627-0432	113.741	791.648	90043.1	522488		44	SUM_Lz14_BcF6-30002.tif:0627-0432	113.741	659.541	75017.1	435297				44	SUM_Lz14_BcF6-150000.tif:0047-0637
45	SUM_Lz14_BcF6-10000.tif:0566-0570	144.934	2801.01	405962	2355654		45	SUM_Lz14_BcF6-10002-1.tif:0566-0570	144.934	1507.51	218489	1267812	10.4013			45	SUM_Lz14_BcF6-20000.tif:0898-0487	97.714	1561.05	152536	885114		45	SUM_Lz14_BcF6-20002-1.tif:0898-0487	97.714	1395.37	136348	791177				45	SUM_Lz14_BcF6-30000.tif:0674-0448	204.045	655.353	133722	775938		45	SUM_Lz14_BcF6-30002.tif:0674-0448	204.045	287.647	58692.9	340574				45	SUM_Lz14_BcF6-150000.tif:0048-0642
46	SUM_Lz14_BcF6-10000.tif:0544-0580	96.508	3175.8	306489	1778447		46	SUM_Lz14_BcF6-10002-1.tif:0544-0580	96.508	1587.71	153227	889119	16.4516			46	SUM_Lz14_BcF6-20000.tif:0820-0461	99.093	1972.17	195428	1133999		46	SUM_Lz14_BcF6-20002-1.tif:0820-0461	99.093	1053.89	104433	605986				46	SUM_Lz14_BcF6-30000.tif:0223-0375	191.292	4291.57	820945	4763648		46	SUM_Lz14_BcF6-30002.tif:0223-0375	191.292	2596.39	496669	2881991				46	SUM_Lz14_BcF6-150000.tif:0049-0648
47	SUM_Lz14_BcF6-10000.tif:0625-0391	76	1494.88	113611	659243		47	SUM_Lz14_BcF6-10002-1.tif:0625-0391	76	763.975	58062	336913	10.0523			47	SUM_Lz14_BcF6-20000.tif:0981-0521	143.383	1502.54	215438	1250110		47	SUM_Lz14_BcF6-20002-1.tif:0981-0521	143.383	868.673	124553	722736				47	SUM_Lz14_BcF6-30000.tif:0269-0426	75.828	2915.9	221106	1282997		47	SUM_Lz14_BcF6-30002.tif:0269-0426	75.828	2130.15	161524	937265				47	SUM_Lz14_BcF6-150000.tif:0050-0653
48	SUM_Lz14_BcF6-10000.tif:0502-0495	176.299	702.498	123850	718655		48	SUM_Lz14_BcF6-10002-1.tif:0502-0495	176.299	483.479	85236.9	494599	2.74238																																			48	SUM_Lz14_BcF6-150000.tif:0051-0668
49	SUM_Lz14_BcF6-10000.tif:0510-0592	119.428	2692.42	321551	1865846		49	SUM_Lz14_BcF6-10002-1.tif:0510-0592	119.428	1853.42	221351	1284423	15.5192																																			49	SUM_Lz14_BcF6-150000.tif:0052-0675
50	SUM_Lz14_BcF6-10000.tif:0728-0687	235.755	423.478	99837	579318		50	SUM_Lz14_BcF6-10002-1.tif:0728-0687	235.755	635.525	149828	869398	2.6957																																			50	SUM_Lz14_BcF6-150000.tif:0053-0763
																																																51	SUM_Lz14_BcF6-150000.tif:0054-0788
																																																52	SUM_Lz14_BcF6-150000.tif:0055-0795
Default																																																53	SUM_Lz14_BcF6-150000.tif:0056-0794
50-200																																																54	SUM_Lz14_BcF6-150000.tif:0057-0854
0.5-1																																																55	SUM_Lz14_BcF6-150000.tif:0058-0855
start figure: PPO1																																																56	SUM_Lz14_BcF6-150000.tif:0059-0875
Threshold int for high: >2500																																																57	SUM_Lz14_BcF6-150000.tif:0060-0914
																																																58	SUM_Lz14_BcF6-150000.tif:0061-0967
																																																59	SUM_Lz14_BcF6-150000.tif:0159-0591
																																																60	SUM_Lz14_BcF6-150000.tif:0168-0673
																																																61	SUM_Lz14_BcF6-150000.tif:0480-0884
																																																62	SUM_Lz14_BcF6-150000.tif:0415-0853
																																																63	SUM_Lz14_BcF6-150000.tif:0865-0816
																																																64	SUM_Lz14_BcF6-150000.tif:0931-0528
																																																65	SUM_Lz14_BcF6-150000.tif:0546-0482
																																																66	SUM_Lz14_BcF6-150000.tif:0528-0442
																																																67	SUM_Lz14_BcF6-150000.tif:0545-0461
																																																68	SUM_Lz14_BcF6-150000.tif:0498-0639
																																																69	SUM_Lz14_BcF6-150000.tif:0413-0420
																																																70	SUM_Lz14_BcF6-150000.tif:0349-0554
																																																71	SUM_Lz14_BcF6-150000.tif:0216-0501
																																																72	SUM_Lz14_BcF6-150000.tif:0177-0485
																																																73	SUM_Lz14_BcF6-150000.tif:0191-0434
																																																74	SUM_Lz14_BcF6-150000.tif:0091-0414
																																																75	SUM_Lz14_BcF6-150000.tif:0116-0437
																																																76	SUM_Lz14_BcF6-150000.tif:0059-0503
																																																77	SUM_Lz14_BcF6-150000.tif:0170-0622
																																																78	SUM_Lz14_BcF6-150000.tif:0385-0590
																																																79	SUM_Lz14_BcF6-150000.tif:0355-0598
																																																80	SUM_Lz14_BcF6-150000.tif:0245-0603
																																																81	SUM_Lz14_BcF6-150000.tif:0519-0477
																																																82	SUM_Lz14_BcF6-150000.tif:0582-0591
																																																83	SUM_Lz14_BcF6-150000.tif:0833-0486
																																																84	SUM_Lz14_BcF6-150000.tif:0421-0637
																																																85	SUM_Lz14_BcF6-150000.tif:0458-0638
																																																86	SUM_Lz14_BcF6-150000.tif:0595-0677
																																																87	SUM_Lz14_BcF6-150000.tif:0602-0650
																																																88	SUM_Lz14_BcF6-150000.tif:0582-0638
																																																89	SUM_Lz14_BcF6-150000.tif:0682-0487
																																																90	SUM_Lz14_BcF6-150000.tif:0322-0605
[truncated: 124 more columns]

## Sheet: NEW data_summing-2
Lz							PPO1									Lz							PPO1									Lz							PPO1									Lz
cell#	sample	area	mean int	int density	raw int den		cell#	sample	area	mean int	int density	raw int den	int/area			cell#	sample	area	mean int	int density	raw int den		cell#	sample	area	mean int	int density	raw int den				cell#	sample	area	mean int	int density	raw int den		cell#	sample	area	mean int	int density	raw int den				cell#	sample
1	SUM_Lz14_BcF6-10000-1.tif:0001-0056	204.562	2501.1	511631	2968809		1	SUM_Lz14_BcF6-10002.tif:0001-0056	204.562	2871.61	587422	3408601				1	SUM_Lz14_BcF6-20000-1.tif:0001-0106	134.249	2178.61	292477	1697139		1	SUM_Lz14_BcF6-20002.tif:0001-0106	134.249	1440.01	193321	1121771				1	SUM_Lz14_BcF6-30000-1.tif:0001-0063	66.177	3254.7	215386	1249805		1	SUM_Lz14_BcF6-30002.tif:0001-0063	66.177	934.089	61815	358690				1	SUM_Lz14_BcF6-40000-1.tif:0001-0151
2	SUM_Lz14_BcF6-10000-1.tif:0002-0091	115.292	3724.36	429390	2491598		2	SUM_Lz14_BcF6-10002.tif:0002-0091	115.292	3411.98	393375	2282615				2	SUM_Lz14_BcF6-20000-1.tif:0002-0139	194.05	4518.01	876717	5087275		2	SUM_Lz14_BcF6-20002.tif:0002-0139	194.05	2469.07	479123	2780177				2	SUM_Lz14_BcF6-30000-1.tif:0002-0123	83.927	3468.73	291121	1689272		2	SUM_Lz14_BcF6-30002.tif:0002-0123	83.927	5122.32	429902	2494568				2	SUM_Lz14_BcF6-40000-1.tif:0002-0157
3	SUM_Lz14_BcF6-10000-1.tif:0003-0112	127.528	4376.78	558163	3238817		3	SUM_Lz14_BcF6-10002.tif:0003-0112	127.528	3893.92	496584	2881501				3	SUM_Lz14_BcF6-20000-1.tif:0003-0159	136.317	4910.45	669380	3884170		3	SUM_Lz14_BcF6-20002.tif:0003-0159	136.317	2067.8	281877	1635629				3	SUM_Lz14_BcF6-30000-1.tif:0003-0134	139.419	5200.81	725093	4207456		3	SUM_Lz14_BcF6-30002.tif:0003-0134	139.419	2005.94	279667	1622808				3	SUM_Lz14_BcF6-40000-1.tif:0003-0167
4	SUM_Lz14_BcF6-10000-1.tif:0004-0128	111.329	3964.68	441383	2561186		4	SUM_Lz14_BcF6-10002.tif:0004-0128	111.329	2501.43	278481	1615923				4	SUM_Lz14_BcF6-20000-1.tif:0004-0183	102.195	3643.78	372376	2160763		4	SUM_Lz14_BcF6-20002.tif:0004-0183	102.195	2182.59	223049	1294274				4	SUM_Lz14_BcF6-30000-1.tif:0004-0184	135.456	2310.82	313013	1816302		4	SUM_Lz14_BcF6-30002.tif:0004-0184	135.456	925.061	125305	727098				4	SUM_Lz14_BcF6-40000-1.tif:0004-0191
5	SUM_Lz14_BcF6-10000-1.tif:0006-0138	190.948	7598.45	1.45091e+06	8419083		5	SUM_Lz14_BcF6-10002.tif:0006-0138	190.948	6211.7	1.18611e+06	6882559				5	SUM_Lz14_BcF6-20000-1.tif:0005-0190	121.841	2885.45	351566	2040013		5	SUM_Lz14_BcF6-20002.tif:0005-0190	121.841	3030.18	369200	2142336				5	SUM_Lz14_BcF6-30000-1.tif:0005-0196	111.329	2897.39	322562	1871712		5	SUM_Lz14_BcF6-30002.tif:0005-0196	111.329	757.339	84313.5	489241				5	SUM_Lz14_BcF6-40000-1.tif:0005-0214
6	SUM_Lz14_BcF6-10000-1.tif:0007-0156	110.122	5055.95	556772	3230750		6	SUM_Lz14_BcF6-10002.tif:0007-0156	110.122	2436.24	268285	1556759				6	SUM_Lz14_BcF6-20000-1.tif:0006-0210	294.349	4564.25	1.34348e+06	7795745		6	SUM_Lz14_BcF6-20002.tif:0006-0210	294.349	2952.15	868962	5042274				6	SUM_Lz14_BcF6-30000-1.tif:0006-0199	41.533	2414.51	100282	581898		6	SUM_Lz14_BcF6-30002.tif:0006-0199	41.533	239.95	9965.81	57828				6	SUM_Lz14_BcF6-40000-1.tif:0006-0220
7	SUM_Lz14_BcF6-10000-1.tif:0008-0172	147.519	3180.16	469134	2722218		7	SUM_Lz14_BcF6-10002.tif:0008-0172	147.519	2261.1	333556	1935503				7	SUM_Lz14_BcF6-20000-1.tif:0007-0203	110.467	2820.33	311553	1807830		7	SUM_Lz14_BcF6-20002.tif:0007-0203	110.467	202.961	22420.5	130098				7	SUM_Lz14_BcF6-30000-1.tif:0007-0251	192.154	4189.4	805009	4671179		7	SUM_Lz14_BcF6-30002.tif:0007-0251	192.154	836.392	160716	932577				7	SUM_Lz14_BcF6-40000-1.tif:0007-0249
8	SUM_Lz14_BcF6-10000-1.tif:0009-0186	245.061	4883.5	1.19675e+06	6944338		8	SUM_Lz14_BcF6-10002.tif:0009-0186	245.061	2778.47	680893	3950980				8	SUM_Lz14_BcF6-20000-1.tif:0008-0218	124.771	3567.28	445093	2582714		8	SUM_Lz14_BcF6-20002.tif:0008-0218	124.771	1216.31	151760	880606				8	SUM_Lz14_BcF6-30000-1.tif:0008-0251	110.812	4063.48	450281	2612816		8	SUM_Lz14_BcF6-30002.tif:0008-0251	110.812	4166.53	461701	2679082				8	SUM_Lz14_BcF6-40000-1.tif:0008-0281
9	SUM_Lz14_BcF6-10000-1.tif:0010-0199	190.775	3558.46	678866	3939218		9	SUM_Lz14_BcF6-10002.tif:0010-0199	190.775	3688.97	703764	4083689				9	SUM_Lz14_BcF6-20000-1.tif:0009-0243	156.48	2330.07	364611	2115707		9	SUM_Lz14_BcF6-20002.tif:0009-0243	156.48	736.458	115241	668704				9	SUM_Lz14_BcF6-30000-1.tif:0009-0310	79.791	4973.53	396845	2302746		9	SUM_Lz14_BcF6-30002.tif:0009-0310	79.791	2383.09	190150	1103371				9	SUM_Lz14_BcF6-40000-1.tif:0009-0362
10	SUM_Lz14_BcF6-10000-1.tif:0011-0195	61.868	3577.91	221360	1284471		10	SUM_Lz14_BcF6-10002.tif:0011-0195	61.868	1806.79	111783	648637				10	SUM_Lz14_BcF6-20000-1.tif:0010-0249	137.179	2431.11	333497	1935166		10	SUM_Lz14_BcF6-20002.tif:0010-0249	137.179	252.901	34692.7	201309				10	SUM_Lz14_BcF6-30000-1.tif:0011-0357	70.83	2142.86	151778	880715		10	SUM_Lz14_BcF6-30002.tif:0011-0357	70.83	1915.73	135691	787367				10	SUM_Lz14_BcF6-40000-1.tif:0010-0367
11	SUM_Lz14_BcF6-10000-1.tif:0012-0204	97.025	3774.96	366265	2125302		11	SUM_Lz14_BcF6-10002.tif:0012-0204	97.025	1742.48	169064	981019				11	SUM_Lz14_BcF6-20000-1.tif:0011-0261	80.998	2834.38	229578	1332160		11	SUM_Lz14_BcF6-20002.tif:0011-0261	80.998	1498.36	121363	704228				11	SUM_Lz14_BcF6-30000-1.tif:0012-0364	71.692	1964.78	140858	817349		11	SUM_Lz14_BcF6-30002.tif:0012-0364	71.692	1044.39	74874.2	434468				11	SUM_Lz14_BcF6-40000-1.tif:0011-0398
12	SUM_Lz14_BcF6-10000-1.tif:0013-0202	87.891	2162.69	190081	1102970		12	SUM_Lz14_BcF6-10002.tif:0013-0202	87.891	398	34980.6	202980				12	SUM_Lz14_BcF6-20000-1.tif:0012-0269	151.138	2182.65	329882	1914186		12	SUM_Lz14_BcF6-20002.tif:0012-0269	151.138	863.192	130461	757019				12	SUM_Lz14_BcF6-30000-1.tif:0013-0420	258.675	3446.61	891553	5173363		12	SUM_Lz14_BcF6-30002.tif:0013-0420	258.675	1497.46	387355	2247684				12	SUM_Lz14_BcF6-40000-1.tif:0012-0405
13	SUM_Lz14_BcF6-10000-1.tif:0014-0229	174.576	3192.58	557347	3234082		13	SUM_Lz14_BcF6-10002.tif:0014-0229	174.576	248.479	43378.4	251709				13	SUM_Lz14_BcF6-20000-1.tif:0013-0323	140.626	2838.55	399172	2316253		13	SUM_Lz14_BcF6-20002.tif:0013-0323	140.626	186.891	26281.7	152503				13	SUM_Lz14_BcF6-30000-1.tif:0014-0404	85.306	3368.45	287349	1667385		13	SUM_Lz14_BcF6-30002.tif:0014-0404	85.306	1107.02	94435.1	547973				13	SUM_Lz14_BcF6-40000-1.tif:0013-0441
14	SUM_Lz14_BcF6-10000-1.tif:0015-0221	41.533	2315.16	96155	557953		14	SUM_Lz14_BcF6-10002.tif:0015-0221	41.533	999.776	41523.5	240946				14	SUM_Lz14_BcF6-20000-1.tif:0014-0342	114.086	2247.79	256441	1488036		14	SUM_Lz14_BcF6-20002.tif:0014-0342	114.086	2330.85	265917	1543021				14	SUM_Lz14_BcF6-30000-1.tif:0015-0412	189.569	3538.28	670748	3892110		14	SUM_Lz14_BcF6-30002.tif:0015-0412	189.569	1807.96	342733	1988756				14	SUM_Lz14_BcF6-40000-1.tif:0014-0446
15	SUM_Lz14_BcF6-10000-1.tif:0016-0227	74.621	5671.45	423211	2455740		15	SUM_Lz14_BcF6-10002.tif:0016-0227	74.621	1511.32	112776	654400				15	SUM_Lz14_BcF6-20000-1.tif:0015-0366	112.363	4440.02	498892	2894893		15	SUM_Lz14_BcF6-20002.tif:0015-0366	112.363	2130.91	239435	1389354				15	SUM_Lz14_BcF6-30000-1.tif:0016-0429	98.059	3193.27	313128	1816972		15	SUM_Lz14_BcF6-30002.tif:0016-0429	98.059	1389.53	136256	790643				15	SUM_Lz14_BcF6-40000-1.tif:0015-0455
16	SUM_Lz14_BcF6-10000-1.tif:0018-0230	65.66	2179.75	143122	830486		16	SUM_Lz14_BcF6-10002.tif:0018-0230	65.66	629.787	41351.7	239949				16	SUM_Lz14_BcF6-20000-1.tif:0016-0376	257.469	3078.31	792569	4598994		16	SUM_Lz14_BcF6-20002.tif:0016-0376	257.469	1501.01	386464	2242512				16	SUM_Lz14_BcF6-30000-1.tif:0017-0438	164.58	3795.11	624601	3624332		16	SUM_Lz14_BcF6-30002.tif:0017-0438	164.58	2584.91	425426	2468592				16	SUM_Lz14_BcF6-40000-1.tif:0016-0462
17	SUM_Lz14_BcF6-10000-1.tif:0019-0234	59.8	2644.87	158164	917771		17	SUM_Lz14_BcF6-10002.tif:0019-0234	59.8	1185.03	70865.2	411205				17	SUM_Lz14_BcF6-20000-1.tif:0019-0401	100.299	2999.14	300811	1745497		17	SUM_Lz14_BcF6-20002.tif:0019-0401	100.299	1134.93	113832	660527				17	SUM_Lz14_BcF6-30000-1.tif:0018-0433	69.796	4485.53	313071	1816641		17	SUM_Lz14_BcF6-30002.tif:0018-0433	69.796	1992.98	139102	807157				17	SUM_Lz14_BcF6-40000-1.tif:0017-0472
18	SUM_Lz14_BcF6-10000-1.tif:0020-0247	63.247	2685.22	169832	985475		18	SUM_Lz14_BcF6-10002.tif:0020-0247	63.247	2349.19	148579	862153				18	SUM_Lz14_BcF6-20000-1.tif:0020-0405	97.369	4603.86	448275	2601181		18	SUM_Lz14_BcF6-20002.tif:0020-0405	97.369	1313.18	127864	741949				18	SUM_Lz14_BcF6-30000-1.tif:0019-0470	137.696	3141.86	432622	2510348		18	SUM_Lz14_BcF6-30002.tif:0019-0470	137.696	179.922	24774.6	143758				18	SUM_Lz14_BcF6-40000-1.tif:0018-0500
19	SUM_Lz14_BcF6-10000-1.tif:0021-0268	105.814	2353.08	248989	1444793		19	SUM_Lz14_BcF6-10002.tif:0021-0268	105.814	2842.95	300824	1745573				19	SUM_Lz14_BcF6-20000-1.tif:0021-0417	119.084	4024.41	479241	2780864		19	SUM_Lz14_BcF6-20002.tif:0021-0417	119.084	239.531	28524.3	165516				19	SUM_Lz14_BcF6-30000-1.tif:0020-0508	438.076	3017.19	1.32176e+06	7669694		19	SUM_Lz14_BcF6-30002.tif:0020-0508	438.076	1450.69	635512	3687646				19	SUM_Lz14_BcF6-40000-1.tif:0020-0539
20	SUM_Lz14_BcF6-10000-1.tif:0022-0268	57.388	2262.5	129840	753412		20	SUM_Lz14_BcF6-10002.tif:0022-0268	57.388	1428.36	81970.4	475645				20	SUM_Lz14_BcF6-20000-1.tif:0022-0421	257.814	3621.33	933628	5417509		20	SUM_Lz14_BcF6-20002.tif:0022-0421	257.814	2824.79	728270	4225889				20	SUM_Lz14_BcF6-30000-1.tif:0021-0499	65.315	2207.64	144192	836695		20	SUM_Lz14_BcF6-30002.tif:0021-0499	65.315	165.251	10793.4	62630				20	SUM_Lz14_BcF6-40000-1.tif:0021-0548
21	SUM_Lz14_BcF6-10000-1.tif:0023-0285	213.179	3524.75	751402	4360117		21	SUM_Lz14_BcF6-10002.tif:0023-0285	213.179	789.981	168407	977206				21	SUM_Lz14_BcF6-20000-1.tif:0023-0442	203.528	5612.43	1.14229e+06	6628275		21	SUM_Lz14_BcF6-20002.tif:0023-0442	203.528	2377.31	483850	2807607				21	SUM_Lz14_BcF6-30000-1.tif:0022-0550	68.762	4037.94	277656	1611138		21	SUM_Lz14_BcF6-30002.tif:0022-0550	68.762	1113.26	76549.8	444191				21	SUM_Lz14_BcF6-40000-1.tif:0022-0572
22	SUM_Lz14_BcF6-10000-1.tif:0024-0279	79.619	3600.83	286694	1663585		22	SUM_Lz14_BcF6-10002.tif:0024-0279	79.619	1430.02	113857	660671				22	SUM_Lz14_BcF6-20000-1.tif:0024-0449	349.151	4224.56	1.47501e+06	8558967		22	SUM_Lz14_BcF6-20002.tif:0024-0449	349.151	1894.35	661413	3837943				22	SUM_Lz14_BcF6-30000-1.tif:0023-0611	174.92	2130.23	372620	2162181		22	SUM_Lz14_BcF6-30002.tif:0023-0611	174.92	782.946	136953	794690				22	SUM_Lz14_BcF6-40000-1.tif:0023-0598
23	SUM_Lz14_BcF6-10000-1.tif:0025-0288	119.428	2666.93	318507	1848184		23	SUM_Lz14_BcF6-10002.tif:0025-0288	119.428	280.453	33494.1	194354				23	SUM_Lz14_BcF6-20000-1.tif:0025-0471	148.208	3386.04	501840	2911997		23	SUM_Lz14_BcF6-20002.tif:0025-0471	148.208	418.643	62046.4	360033				23	SUM_Lz14_BcF6-30000-1.tif:0024-0610	62.213	2790.52	173607	1007378		23	SUM_Lz14_BcF6-30002.tif:0024-0610	62.213	2117.67	131747	764478				23	SUM_Lz14_BcF6-40000-1.tif:0024-0620
24	SUM_Lz14_BcF6-10000-1.tif:0026-0291	167.338	3240.46	542251	3146488		24	SUM_Lz14_BcF6-10002.tif:0026-0291	167.338	1774.55	296949	1723087				24	SUM_Lz14_BcF6-20000-1.tif:0026-0485	176.644	2329.47	411487	2387710		24	SUM_Lz14_BcF6-20002.tif:0026-0485	176.644	370.82	65503.1	380091				24	SUM_Lz14_BcF6-30000-1.tif:0025-0613	81.687	2971.02	242694	1408265		24	SUM_Lz14_BcF6-30002.tif:0025-0613	81.687	1033.62	84433.6	489938				24	SUM_Lz14_BcF6-40000-1.tif:0025-0617
25	SUM_Lz14_BcF6-10000-1.tif:0028-0328	149.242	5926.52	884488	5132364		25	SUM_Lz14_BcF6-10002.tif:0028-0328	149.242	3115.72	464997	2698211				25	SUM_Lz14_BcF6-20000-1.tif:0027-0483	152.689	2887.31	440860	2558153		25	SUM_Lz14_BcF6-20002.tif:0027-0483	152.689	2292.95	350109	2031558				25	SUM_Lz14_BcF6-30000-1.tif:0027-0634	69.451	3274.28	227402	1319533		25	SUM_Lz14_BcF6-30002.tif:0027-0634	69.451	3256.27	226152	1312278				25	SUM_Lz14_BcF6-40000-1.tif:0026-0636
26	SUM_Lz14_BcF6-10000-1.tif:0029-0348	36.535	1912.96	69890.1	405547		26	SUM_Lz14_BcF6-10002.tif:0029-0348	36.535	6452.42	235740	1367913				26	SUM_Lz14_BcF6-20000-1.tif:0028-0497	208.526	5992.8	1.24965e+06	7251285		26	SUM_Lz14_BcF6-20002.tif:0028-0497	208.526	1898.59	395905	2297292				26	SUM_Lz14_BcF6-30000-1.tif:0028-0645	128.39	3015.21	387123	2246333		26	SUM_Lz14_BcF6-30002.tif:0028-0645	128.39	401.838	51591.9	299369				26	SUM_Lz14_BcF6-40000-1.tif:0027-0634
27	SUM_Lz14_BcF6-10000-1.tif:0030-0362	140.798	4805.61	676621	3926187		27	SUM_Lz14_BcF6-10002.tif:0030-0362	140.798	2576.74	362800	2105196				27	SUM_Lz14_BcF6-20000-1.tif:0029-0508	130.803	2653.89	347136	2014303		27	SUM_Lz14_BcF6-20002.tif:0029-0508	130.803	1329.06	173844	1008753				27	SUM_Lz14_BcF6-30000-1.tif:0029-0740	132.181	2859.72	378001	2193405		27	SUM_Lz14_BcF6-30002.tif:0029-0740	132.181	209.28	27662.9	160518				27	SUM_Lz14_BcF6-40000-1.tif:0028-0656
28	SUM_Lz14_BcF6-10000-1.tif:0031-0362	138.385	6001.47	830516	4819184		28	SUM_Lz14_BcF6-10002.tif:0031-0362	138.385	3379.06	467612	2713386				28	SUM_Lz14_BcF6-20000-1.tif:0030-0517	243.165	2567.26	624269	3622407		28	SUM_Lz14_BcF6-20002.tif:0030-0517	243.165	1138.7	276892	1606703				28	SUM_Lz14_BcF6-30000-1.tif:0030-0975	122.186	3120.97	381338	2212766		28	SUM_Lz14_BcF6-30002.tif:0030-0975	122.186	1076.34	131513	763124				28	SUM_Lz14_BcF6-40000-1.tif:0029-0671
29	SUM_Lz14_BcF6-10000-1.tif:0032-0370	121.152	6604.14	800103	4642712		29	SUM_Lz14_BcF6-10002.tif:0032-0370	121.152	3243.3	392932	2280043				29	SUM_Lz14_BcF6-20000-1.tif:0031-0515	70.83	3627.49	256935	1490899		29	SUM_Lz14_BcF6-20002.tif:0031-0515	70.83	1910.44	135316	785189				29	SUM_Lz14_BcF6-30000-1.tif:0316-0717	317.959	1530.5	486637	2823778		29	SUM_Lz14_BcF6-30002.tif:0316-0717	317.959	120.601	38346.2	222509				29	SUM_Lz14_BcF6-40000-1.tif:0030-0672
30	SUM_Lz14_BcF6-10000-1.tif:0033-0393	145.623	4311.8	627898	3643468		30	SUM_Lz14_BcF6-10002.tif:0033-0393	145.623	4278.62	623068	3615437				30	SUM_Lz14_BcF6-20000-1.tif:0032-0531	207.147	2605.58	539738	3131907		30	SUM_Lz14_BcF6-20002.tif:0032-0531	207.147	935.116	193707	1124010				30	SUM_Lz14_BcF6-30000-1.tif:0335-0758	348.29	2066.66	719796	4176717		30	SUM_Lz14_BcF6-30002.tif:0335-0758	348.29	135.786	47292.8	274423				30	SUM_Lz14_BcF6-40000-1.tif:0031-0670
31	SUM_Lz14_BcF6-10000-1.tif:0034-0417	112.018	2938.46	329160	1909999		31	SUM_Lz14_BcF6-10002.tif:0034-0417	112.018	6370.06	713561	4140539				31	SUM_Lz14_BcF6-20000-1.tif:0033-0524	50.322	2536.28	127630	740593		31	SUM_Lz14_BcF6-20002.tif:0033-0524	50.322	911.661	45876.5	266205				31	SUM_Lz14_BcF6-30000-1.tif:0328-0875	123.047	1134.38	139582	809944		31	SUM_Lz14_BcF6-30002.tif:0328-0875	123.047	504.305	62053.5	360074				31	SUM_Lz14_BcF6-40000-1.tif:0032-0680
32	SUM_Lz14_BcF6-10000-1.tif:0035-0419	53.424	2758.99	147396	855286		32	SUM_Lz14_BcF6-10002.tif:0035-0419	53.424	166.361	8887.68	51572				32	SUM_Lz14_BcF6-20000-1.tif:0034-0553	230.068	4009.69	922499	5352931		32	SUM_Lz14_BcF6-20002.tif:0034-0553	230.068	3530.98	812364	4713854				32	SUM_Lz14_BcF6-30000-1.tif:0688-0499	242.303	1869.74	453044	2628851		32	SUM_Lz14_BcF6-30002.tif:0688-0499	242.303	409.986	99341.2	576441				32	SUM_Lz14_BcF6-40000-1.tif:0033-0707
33	SUM_Lz14_BcF6-10000-1.tif:0036-0431	100.127	3987.3	399236	2316621		33	SUM_Lz14_BcF6-10002.tif:0036-0431	100.127	2666.52	266990	1549246				33	SUM_Lz14_BcF6-20000-1.tif:0035-0555	170.44	3560.36	606827	3521200		33	SUM_Lz14_BcF6-20002.tif:0035-0555	170.44	1724.11	293857	1705149				33	SUM_Lz14_BcF6-30000-1.tif:0636-0400	137.868	2674.84	368775	2139869		33	SUM_Lz14_BcF6-30002.tif:0636-0400	137.868	485.141	66885.6	388113				33	SUM_Lz14_BcF6-40000-1.tif:0034-0713
34	SUM_Lz14_BcF6-10000-1.tif:0037-0442	38.086	2944.41	112141	650715		34	SUM_Lz14_BcF6-10002.tif:0037-0442	38.086	1801.34	68606.2	398097				34	SUM_Lz14_BcF6-20000-1.tif:0036-0562	352.253	2950.82	1.03943e+06	6031466		34	SUM_Lz14_BcF6-20002.tif:0036-0562	352.253	1251.81	440955	2558705				34	SUM_Lz14_BcF6-30000-1.tif:0640-0373	137.868	1741.99	240166	1393594		34	SUM_Lz14_BcF6-30002.tif:0640-0373	137.868	251.339	34651.6	201071				34	SUM_Lz14_BcF6-40000-1.tif:0035-0729
35	SUM_Lz14_BcF6-10000-1.tif:0038-0454	160.1	4034.88	645982	3748404		35	SUM_Lz14_BcF6-10002.tif:0038-0454	160.1	648.169	103772	602149				35	SUM_Lz14_BcF6-20000-1.tif:0037-0560	194.911	2685.96	523523	3037816		35	SUM_Lz14_BcF6-20002.tif:0037-0560	194.911	882.57	172023	998187				35	SUM_Lz14_BcF6-30000-1.tif:0493-0148	255.746	1598.17	408724	2371681		35	SUM_Lz14_BcF6-30002.tif:0493-0148	255.746	144.191	36876.3	213980				35	SUM_Lz14_BcF6-40000-1.tif:0036-0740
36	SUM_Lz14_BcF6-10000-1.tif:0039-0447	68.934	3446.67	237593	1378669		36	SUM_Lz14_BcF6-10002.tif:0039-0447	68.934	7218.79	497621	2887515				36	SUM_Lz14_BcF6-20000-1.tif:0038-0570	156.136	3829.98	597997	3469959		36	SUM_Lz14_BcF6-20002.tif:0038-0570	156.136	2023.77	315983	1833535				36	SUM_Lz14_BcF6-30000-1.tif:0450-0173	210.938	1316.32	277662	1611173		36	SUM_Lz14_BcF6-30002.tif:0450-0173	210.938	126.248	26630.5	154527				36	SUM_Lz14_BcF6-40000-1.tif:0037-0743
37	SUM_Lz14_BcF6-10000-1.tif:0040-0445	73.932	2899.42	214359	1243850		37	SUM_Lz14_BcF6-10002.tif:0040-0445	73.932	1765.21	130505	757274				37	SUM_Lz14_BcF6-20000-1.tif:0039-0584	31.02	2516.97	78077.4	453055		37	SUM_Lz14_BcF6-20002.tif:0039-0584	31.02	1800.11	55839.9	324019				37	SUM_Lz14_BcF6-30000-1.tif:0068-0317	255.401	976.916	249505	1447790		37	SUM_Lz14_BcF6-30002.tif:0068-0317	255.401	208.252	53187.7	308629				37	SUM_Lz14_BcF6-40000-1.tif:0038-0754
38	SUM_Lz14_BcF6-10000-1.tif:0042-0494	100.299	2633.65	264153	1532783		38	SUM_Lz14_BcF6-10002.tif:0042-0494	100.299	1247.51	125124	726051				38	SUM_Lz14_BcF6-20000-1.tif:0040-0606	114.775	3419.99	392530	2277713		38	SUM_Lz14_BcF6-20002.tif:0040-0606	114.775	1391.37	159695	926654				38	SUM_Lz14_BcF6-30000-1.tif:0075-0368	142.177	1106.86	157369	913156		38	SUM_Lz14_BcF6-30002.tif:0075-0368	142.177	3788.77	538675	3125737				38	SUM_Lz14_BcF6-40000-1.tif:0039-0770
39	SUM_Lz14_BcF6-10000-1.tif:0043-0494	93.233	5416.3	504980	2930217		39	SUM_Lz14_BcF6-10002.tif:0043-0494	93.233	3313.69	308946	1792705				39	SUM_Lz14_BcF6-20000-1.tif:0041-0616	79.447	4854.89	385705	2238106		39	SUM_Lz14_BcF6-20002.tif:0041-0616	79.447	2207.01	175340	1017434				39	SUM_Lz14_BcF6-30000-1.tif:0120-0435	83.238	1092.96	90975.8	527900		39	SUM_Lz14_BcF6-30002.tif:0120-0435	83.238	845.41	70370.2	408333				39	SUM_Lz14_BcF6-40000-1.tif:0040-0795
40	SUM_Lz14_BcF6-10000-1.tif:0044-0514	254.367	3370.2	857267	4974413		40	SUM_Lz14_BcF6-10002.tif:0044-0514	254.367	1309.9	333197	1933420				40	SUM_Lz14_BcF6-20000-1.tif:0042-0637	139.936	3199.84	447773	2598267		40	SUM_Lz14_BcF6-20002.tif:0042-0637	139.936	1273.86	178259	1034374				40	SUM_Lz14_BcF6-30000-1.tif:0231-0390	113.741	4163.09	473516	2747641		40	SUM_Lz14_BcF6-30002.tif:0231-0390	113.741	2161.07	245803	1426304				40	SUM_Lz14_BcF6-40000-1.tif:0041-0800
41	SUM_Lz14_BcF6-10000-1.tif:0045-0514	65.832	3361.96	221325	1284270		41	SUM_Lz14_BcF6-10002.tif:0045-0514	65.832	1708.57	112478	652672				41	SUM_Lz14_BcF6-20000-1.tif:0043-0638	167.165	4379.56	732110	4248171		41	SUM_Lz14_BcF6-20002.tif:0043-0638	167.165	1045.43	174759	1014063				41	SUM_Lz14_BcF6-30000-1.tif:0188-0355	125.632	1810.81	227497	1320083		41	SUM_Lz14_BcF6-30002.tif:0188-0355	125.632	168.967	21227.8	123177				41	SUM_Lz14_BcF6-40000-1.tif:0042-0797
42	SUM_Lz14_BcF6-10000-1.tif:0046-0530	115.292	2559.84	295130	1712531		42	SUM_Lz14_BcF6-10002.tif:0046-0530	115.292	271.037	31248.5	181324				42	SUM_Lz14_BcF6-20000-1.tif:0044-0665	136.49	2818.9	384750	2232567		42	SUM_Lz14_BcF6-20002.tif:0044-0665	136.49	1303.91	177970	1032696				42	SUM_Lz14_BcF6-30000-1.tif:0297-0553	193.36	2632.34	508989	2953481		42	SUM_Lz14_BcF6-30002.tif:0297-0553	193.36	1785.54	345253	2003380				42	SUM_Lz14_BcF6-40000-1.tif:0044-0827
43	SUM_Lz14_BcF6-10000-1.tif:0047-0549	145.451	2917.01	424282	2461956		43	SUM_Lz14_BcF6-10002.tif:0047-0549	145.451	1493.56	217240	1260565				43	SUM_Lz14_BcF6-20000-1.tif:0045-0679	116.843	5415.52	632767	3671721		43	SUM_Lz14_BcF6-20002.tif:0045-0679	116.843	1915.86	223856	1298956				43	SUM_Lz14_BcF6-30000-1.tif:0399-0557	271.428	3145.72	853837	4954508		43	SUM_Lz14_BcF6-30002.tif:0399-0557	271.428	1965.33	533445	3095392				43	SUM_Lz14_BcF6-40000-1.tif:0045-0863
44	SUM_Lz14_BcF6-10000-1.tif:0048-0573	263.845	3174.36	837540	4859945		44	SUM_Lz14_BcF6-10002.tif:0048-0573	263.845	1230.38	324629	1883708				44	SUM_Lz14_BcF6-20000-1.tif:0046-0705	300.036	5532.61	1.65998e+06	9632278		44	SUM_Lz14_BcF6-20002.tif:0046-0705	300.036	2141.17	642428	3727776				44	SUM_Lz14_BcF6-30000-1.tif:0341-0643	143.383	862.115	123613	717280		44	SUM_Lz14_BcF6-30002.tif:0341-0643	143.383	133.851	19192	111364				44	SUM_Lz14_BcF6-40000-1.tif:0046-0880
45	SUM_Lz14_BcF6-10000-1.tif:0049-0570	114.948	4454.5	512034	2971149		45	SUM_Lz14_BcF6-10002.tif:0049-0570	114.948	2204.79	253436	1470596				45	SUM_Lz14_BcF6-20000-1.tif:0048-0717	402.748	3905.23	1.57282e+06	9126533		45	SUM_Lz14_BcF6-20002.tif:0048-0717	402.748	1061.34	427451	2480343				45	SUM_Lz14_BcF6-30000-1.tif:0612-0554	107.02	2203.86	235857	1368596		45	SUM_Lz14_BcF6-30002.tif:0612-0554	107.02	684.337	73237.9	424973				45	SUM_Lz14_BcF6-40000-1.tif:0611-0965
46	SUM_Lz14_BcF6-10000-1.tif:0050-0581	83.583	5039.32	421200	2444072		46	SUM_Lz14_BcF6-10002.tif:0050-0581	83.583	1895.98	158471	919549				46	SUM_Lz14_BcF6-20000-1.tif:0049-0751	217.66	3219.43	700741	4066146		46	SUM_Lz14_BcF6-20002.tif:0049-0751	217.66	225.248	49027.3	284488				46	SUM_Lz14_BcF6-30000-1.tif:0609-0603	96.508	2673.31	257995	1497055		46	SUM_Lz14_BcF6-30002.tif:0609-0603	96.508	3353.76	323664	1878105				46	SUM_Lz14_BcF6-40000-1.tif:0468-0812
47	SUM_Lz14_BcF6-10000-1.tif:0052-0612	156.825	7160.48	1.12294e+06	6516034		47	SUM_Lz14_BcF6-10002.tif:0052-0612	156.825	3225.9	505903	2935573				47	SUM_Lz14_BcF6-20000-1.tif:0050-0783	70.485	2217.95	156333	907143		47	SUM_Lz14_BcF6-20002.tif:0050-0783	70.485	546.861	38545.6	223666				47	SUM_Lz14_BcF6-30000-1.tif:0667-0438	223.174	896.436	200061	1160884		47	SUM_Lz14_BcF6-30002.tif:0667-0438	223.174	411.009	91726.7	532257				47	SUM_Lz14_BcF6-40000-1.tif:0319-0802
48	SUM_Lz14_BcF6-10000-1.tif:0053-0616	150.621	4801.02	723135	4196091		48	SUM_Lz14_BcF6-10002.tif:0053-0616	150.621	2051.47	308994	1792983				48	SUM_Lz14_BcF6-20000-1.tif:0051-0819	259.192	4966.11	1.28718e+06	7469035		48	SUM_Lz14_BcF6-20002.tif:0051-0819	259.192	2356.95	610904	3544855				48	SUM_Lz14_BcF6-30000-1.tif:0574-0427	169.923	1016.85	172787	1002618		48	SUM_Lz14_BcF6-30002.tif:0574-0427	169.923	323.407	54954.1	318879				48	SUM_Lz14_BcF6-40000-1.tif:0376-0956
49	SUM_Lz14_BcF6-10000-1.tif:0054-0638	39.637	2379.66	94322.9	547322		49	SUM_Lz14_BcF6-10002.tif:0054-0638	39.637	451.239	17885.8	103785				49	SUM_Lz14_BcF6-20000-1.tif:0052-0829	103.057	3226.55	332517	1929474		49	SUM_Lz14_BcF6-20002.tif:0052-0829	103.057	226.104	23301.5	135210				49	SUM_Lz14_BcF6-30000-1.tif:0529-0429	160.272	910.092	145862	846386		49	SUM_Lz14_BcF6-30002.tif:0529-0429	160.272	241.66	38731.3	224744				49	SUM_Lz14_BcF6-40000-1.tif:0521-0705
50	SUM_Lz14_BcF6-10000-1.tif:0056-0648	65.832	2499.06	164518	954640		50	SUM_Lz14_BcF6-10002.tif:0056-0648	65.832	804.61	52969.2	307361				50	SUM_Lz14_BcF6-20000-1.tif:0053-0849	230.24	3637.11	837409	4859185		50	SUM_Lz14_BcF6-20002.tif:0053-0849	230.24	1653.74	380756	2209392				50	SUM_Lz14_BcF6-30000-1.tif:0548-0381	201.632	842.782	169932	986055		50	SUM_Lz14_BcF6-30002.tif:0548-0381	201.632	314.109	63334.6	367508				50	SUM_Lz14_BcF6-40000-1.tif:0555-0747
51	SUM_Lz14_BcF6-10000-1.tif:0059-0668	196.635	4990.32	981269	5693952		51	SUM_Lz14_BcF6-10002.tif:0059-0668	196.635	1051.46	206753	1199714				51	SUM_Lz14_BcF6-20000-1.tif:0054-0845	121.152	2743.45	332374	1928644		51	SUM_Lz14_BcF6-20002.tif:0054-0845	121.152	910.366	110292	639987				51	SUM_Lz14_BcF6-30000-1.tif:0800-0308	451.863	868.039	392235	2275999		51	SUM_Lz14_BcF6-30002.tif:0800-0308	451.863	153.342	69289.7	402063				51	SUM_Lz14_BcF6-40000-1.tif:0796-0393
52	SUM_Lz14_BcF6-10000-1.tif:0060-0664	69.106	3380	233580	1355381		52	SUM_Lz14_BcF6-10002.tif:0060-0664	69.106	5113.06	353346	2050338				52	SUM_Lz14_BcF6-20000-1.tif:0055-0846	57.215	2556.57	146275	848781		52	SUM_Lz14_BcF6-20002.tif:0055-0846	57.215	222.262	12716.8	73791				52	SUM_Lz14_BcF6-30000-1.tif:0343-0388	175.782	3568.26	627236	3639627		52	SUM_Lz14_BcF6-30002.tif:0343-0388	175.782	1088.25	191295	1110014				52	SUM_Lz14_BcF6-40000-1.tif:0844-0379
53	SUM_Lz14_BcF6-10000-1.tif:0061-0694	250.748	4180.13	1.04816e+06	6082092		53	SUM_Lz14_BcF6-10002.tif:0061-0694	250.748	1923.99	482437	2799409				53	SUM_Lz14_BcF6-20000-1.tif:0056-0849	60.49	2559.28	154810	898309		53	SUM_Lz14_BcF6-20002.tif:0056-0849	60.49	1060.48	64148.2	372229				53	SUM_Lz14_BcF6-30000-1.tif:0256-0125	407.573	952.05	388030	2251598		53	SUM_Lz14_BcF6-30002.tif:0256-0125	407.573	118.123	48143.9	279362				53	SUM_Lz14_BcF6-40000-1.tif:0840-0421
54	SUM_Lz14_BcF6-10000-1.tif:0062-0740	102.195	2243.11	229234	1330163		54	SUM_Lz14_BcF6-10002.tif:0062-0740	102.195	1619.77	165532	960523				54	SUM_Lz14_BcF6-20000-1.tif:0057-0902	112.535	2773.3	312093	1810964		54	SUM_Lz14_BcF6-20002.tif:0057-0902	112.535	339.557	38212.1	221731				54	SUM_Lz14_BcF6-30000-1.tif:0521-0576	519.591	978.437	508387	2949989		54	SUM_Lz14_BcF6-30002.tif:0521-0576	519.591	286.878	149059	864937				54	SUM_Lz14_BcF6-40000-1.tif:0714-0364
55	SUM_Lz14_BcF6-10000-1.tif:0064-0764	113.569	4517.35	513031	2976937		55	SUM_Lz14_BcF6-10002.tif:0064-0764	113.569	2362.37	268292	1556801				55	SUM_Lz14_BcF6-20000-1.tif:0058-0916	178.539	8968.18	1.60117e+06	9291032		55	SUM_Lz14_BcF6-20002.tif:0058-0916	178.539	3626.33	647443	3756878																				55	SUM_Lz14_BcF6-40000-1.tif:0591-0336
56	SUM_Lz14_BcF6-10000-1.tif:0065-0774	70.83	4707.58	333437	1934815		56	SUM_Lz14_BcF6-10002.tif:0065-0774	70.83	646.509	45792.1	265715				56	SUM_Lz14_BcF6-20000-1.tif:0059-0943	89.27	4634.23	413696	2400529		56	SUM_Lz14_BcF6-20002.tif:0059-0943	89.27	1175.47	104934	608894																				56	SUM_Lz14_BcF6-40000-1.tif:0555-0354
57	SUM_Lz14_BcF6-10000-1.tif:0066-0815	259.537	4324.52	1.12237e+06	6512734		57	SUM_Lz14_BcF6-10002.tif:0066-0815	259.537	206.438	53578.4	310896				57	SUM_Lz14_BcF6-20000-1.tif:0060-0961	89.27	2717.35	242577	1407585		57	SUM_Lz14_BcF6-20002.tif:0060-0961	89.27	1103.47	98506.5	571598																				57	SUM_Lz14_BcF6-40000-1.tif:0464-0356
58	SUM_Lz14_BcF6-10000-1.tif:0067-0829	142.004	4867.02	691138	4010423		58	SUM_Lz14_BcF6-10002.tif:0067-0829	142.004	2496.26	354480	2056921				58	SUM_Lz14_BcF6-20000-1.tif:0061-0984	119.601	5562.43	665270	3860325		58	SUM_Lz14_BcF6-20002.tif:0061-0984	119.601	2973.88	355678	2063871																				58	SUM_Lz14_BcF6-40000-1.tif:0432-0382
59	SUM_Lz14_BcF6-10000-1.tif:0068-0874	125.977	3145.82	396302	2299597		59	SUM_Lz14_BcF6-10002.tif:0068-0874	125.977	1040.66	131099	760721				59	SUM_Lz14_BcF6-20000-1.tif:0062-0996	36.707	2085.68	76560.1	444251		59	SUM_Lz14_BcF6-20002.tif:0062-0996	36.707	124.315	4563.27	26479																				59	SUM_Lz14_BcF6-40000-1.tif:0319-0360
60	SUM_Lz14_BcF6-10000-1.tif:0070-0908	382.929	6259.9	2.3971e+06	13909494		60	SUM_Lz14_BcF6-10002.tif:0070-0908	382.929	3261.6	1.24896e+06	7247272				60	SUM_Lz14_BcF6-20000-1.tif:0063-1002	82.204	4278.56	351715	2040874		60	SUM_Lz14_BcF6-20002.tif:0063-1002	82.204	1984.24	163113	946484																				60	SUM_Lz14_BcF6-40000-1.tif:0363-0332
61	SUM_Lz14_BcF6-10000-1.tif:0072-0916	87.546	4991.07	436950	2535463		61	SUM_Lz14_BcF6-10002.tif:0072-0916	87.546	2561.85	224281	1301420				61	SUM_Lz14_BcF6-20000-1.tif:0629-0501	332.09	2444.02	811634	4709620		61	SUM_Lz14_BcF6-20002.tif:0629-0501	332.09	1328.01	441018	2559069																				61	SUM_Lz14_BcF6-40000-1.tif:0238-0330
62	SUM_Lz14_BcF6-10000-1.tif:0073-0940	194.394	3369.21	654955	3800467		62	SUM_Lz14_BcF6-10002.tif:0073-0940	194.394	148.417	28851.3	167414				62	SUM_Lz14_BcF6-20000-1.tif:0555-0543	313.65	2817.38	883672	5127633		62	SUM_Lz14_BcF6-20002.tif:0555-0543	313.65	1799.26	564338	3274651																				62	SUM_Lz14_BcF6-40000-1.tif:0200-0321
63	SUM_Lz14_BcF6-10000-1.tif:0074-0934	57.905	2410.86	139600	810048		63	SUM_Lz14_BcF6-10002.tif:0074-0934	57.905	1181.61	68420.8	397021				63	SUM_Lz14_BcF6-20000-1.tif:0421-0581	115.809	3129.97	362479	2103337		63	SUM_Lz14_BcF6-20002.tif:0421-0581	115.809	327.561	37934.6	220121																				63	SUM_Lz14_BcF6-40000-1.tif:0323-0561
64	SUM_Lz14_BcF6-10000-1.tif:0075-0954	129.424	2283.03	295479	1714559		64	SUM_Lz14_BcF6-10002.tif:0075-0954	129.424	151.919	19661.9	114091				64	SUM_Lz14_BcF6-20000-1.tif:0471-0483	181.641	1392.1	252864	1467276		64	SUM_Lz14_BcF6-20002.tif:0471-0483	181.641	534.467	97081.3	563328																				64	SUM_Lz14_BcF6-40000-1.tif:0533-0536
65	SUM_Lz14_BcF6-10000-1.tif:0076-0955	90.993	4557.82	414730	2406528		65	SUM_Lz14_BcF6-10002.tif:0076-0955	90.993	166.58	15157.6	87954				65	SUM_Lz14_BcF6-20000-1.tif:0143-0429	204.045	2351.73	479860	2784453		65	SUM_Lz14_BcF6-20002.tif:0143-0429	204.045	1463.1	298537	1732305																				65	SUM_Lz14_BcF6-40000-1.tif:0602-0535
66	SUM_Lz14_BcF6-10000-1.tif:0077-0975	223.519	3154.39	705066	4091243		66	SUM_Lz14_BcF6-10002.tif:0077-0975	223.519	361.128	80718.9	468383				66	SUM_Lz14_BcF6-20000-1.tif:0153-0383	205.079	1855.28	380478	2207779		66	SUM_Lz14_BcF6-20002.tif:0153-0383	205.079	1126.98	231120	1341108																				66	SUM_Lz14_BcF6-40000-1.tif:0725-0581
67	SUM_Lz14_BcF6-10000-1.tif:0078-0972	63.075	2085.64	131551	763346		67	SUM_Lz14_BcF6-10002.tif:0078-0972	63.075	122.88	7750.61	44974				67	SUM_Lz14_BcF6-20000-1.tif:0378-0305	290.04	1232.94	357603	2075042		67	SUM_Lz14_BcF6-20002.tif:0378-0305	290.04	230.352	66811.5	387683																				67	SUM_Lz14_BcF6-40000-1.tif:0801-0561
68	SUM_Lz14_BcF6-10000-1.tif:0658-0171	376.38	1167.12	439281	2548991		68	SUM_Lz14_BcF6-10002.tif:0658-0171	376.38	138.883	52272.9	303321				68	SUM_Lz14_BcF6-20000-1.tif:0342-0336	103.401	2411.21	249322	1446725		68	SUM_Lz14_BcF6-20002.tif:0342-0336	103.401	1287.03	133081	772220																				68	SUM_Lz14_BcF6-40000-1.tif:0960-0670
69	SUM_Lz14_BcF6-10000-1.tif:0122-0013	89.614	6561.69	588022	3412078		69	SUM_Lz14_BcF6-10002.tif:0122-0013	89.614	132.804	11901.1	69058				69	SUM_Lz14_BcF6-20000-1.tif:0304-0321	379.138	1407.05	533467	3095516		69	SUM_Lz14_BcF6-20002.tif:0304-0321	379.138	206.756	78389	454863																				69	SUM_Lz14_BcF6-40000-1.tif:0075-0205
70	SUM_Lz14_BcF6-10000-1.tif:0131-0048	396.888	1256.18	498562	2892976		70	SUM_Lz14_BcF6-10002.tif:0131-0048	396.888	167.628	66529.5	386047				70	SUM_Lz14_BcF6-20000-1.tif:0333-0891	465.822	958.803	446632	2591645		70	SUM_Lz14_BcF6-20002.tif:0333-0891	465.822	165.191	76949.5	446510
71	SUM_Lz14_BcF6-10000-1.tif:0083-0454	411.02	1835.58	754458	4377850		71	SUM_Lz14_BcF6-10002.tif:0083-0454	411.02	4061.78	1.66947e+06	9687341				71	SUM_Lz14_BcF6-20000-1.tif:0563-0726	261.95	1282.25	335885	1949018		71	SUM_Lz14_BcF6-20002.tif:0563-0726	261.95	110.886	29046.4	168546
72	SUM_Lz14_BcF6-10000-1.tif:0072-0513	451.863	1127.96	509683	2957505		72	SUM_Lz14_BcF6-10002.tif:0072-0513	451.863	357.161	161388	936476				72	SUM_Lz14_BcF6-20000-1.tif:0889-0662	566.983	1452.9	823771	4780048		72	SUM_Lz14_BcF6-20002.tif:0889-0662	566.983	245.898	139420	809004
73	SUM_Lz14_BcF6-10000-1.tif:0113-0538	220.589	874.47	192899	1119321		73	SUM_Lz14_BcF6-10002.tif:0113-0538	220.589	3354.22	739904	4293399				73	SUM_Lz14_BcF6-20000-1.tif:0926-0486	260.571	1459.45	380291	2206693		73	SUM_Lz14_BcF6-20002.tif:0926-0486	260.571	276.202	71970.3	417618
74	SUM_Lz14_BcF6-10000-1.tif:0161-0634	296.761	1758.16	521755	3027554		74	SUM_Lz14_BcF6-10002.tif:0161-0634	296.761	197.798	58699	340609				74	SUM_Lz14_BcF6-20000-1.tif:0750-0379	320.888	2601.49	834787	4843967		74	SUM_Lz14_BcF6-20002.tif:0750-0379	320.888	648.881	208218	1208217
75	SUM_Lz14_BcF6-10000-1.tif:0401-0481	206.802	4014.71	830252	4817653		75	SUM_Lz14_BcF6-10002.tif:0401-0481	206.802	3144.13	650213	3772955				75	SUM_Lz14_BcF6-20000-1.tif:0734-0429	370.521	1434.56	531536	3084311		75	SUM_Lz14_BcF6-20002.tif:0734-0429	370.521	2324.97	861449	4998676
76	SUM_Lz14_BcF6-10000-1.tif:0322-0536	455.999	2285.32	1.04211e+06	6046967		76	SUM_Lz14_BcF6-10002.tif:0322-0536	455.999	977.159	445584	2585564				76	SUM_Lz14_BcF6-20000-1.tif:0685-0419	162.512	2188.57	355670	2063826		76	SUM_Lz14_BcF6-20002.tif:0685-0419	162.512	2646.96	430164	2496086
77	SUM_Lz14_BcF6-10000-1.tif:0363-0554	154.929	1834.22	284175	1648963		77	SUM_Lz14_BcF6-10002.tif:0363-0554	154.929	845.511	130995	760114				77	SUM_Lz14_BcF6-20000-1.tif:0604-0425	254.884	2646.89	674650	3914752		77	SUM_Lz14_BcF6-20002.tif:0604-0425	254.884	1293.32	329647	1912823
78	SUM_Lz14_BcF6-10000-1.tif:0424-0544	224.036	2195.08	491778	2853609		78	SUM_Lz14_BcF6-10002.tif:0424-0544	224.036	2039.7	456967	2651615				78	SUM_Lz14_BcF6-20000-1.tif:0587-0380	175.782	2185.45	384163	2229161		78	SUM_Lz14_BcF6-20002.tif:0587-0380	175.782	376.273	66142	383798
79	SUM_Lz14_BcF6-10000-1.tif:0882-0577	244.544	1752.54	428572	2486847		79	SUM_Lz14_BcF6-10002.tif:0882-0577	244.544	180.218	44071.1	255729				79	SUM_Lz14_BcF6-20000-1.tif:0534-0424	159.927	1595.21	255117	1480352		79	SUM_Lz14_BcF6-20002.tif:0534-0424	159.927	265.676	42488.8	246547
80	SUM_Lz14_BcF6-10000-1.tif:0920-0560	199.047	2061.51	410338	2381045		80	SUM_Lz14_BcF6-10002.tif:0920-0560	199.047	206.686	41140.2	238722
81	SUM_Lz14_BcF6-10000-1.tif:0976-0661	173.714	1215.99	211235	1225719		81	SUM_Lz14_BcF6-10002.tif:0976-0661	173.714	139.335	24204.5	140450
82	SUM_Lz14_BcF6-10000-1.tif:0606-0794	311.238	957.335	297959	1728947		82	SUM_Lz14_BcF6-10002.tif:0606-0794	311.238	210.306	65455	379812
83	SUM_Lz14_BcF6-10000-1.tif:0929-0492	326.058	2074.26	676329	3924495		83	SUM_Lz14_BcF6-10002.tif:0929-0492	326.058	249.93	81491.7	472867
84	SUM_Lz14_BcF6-10000-1.tif:0888-0515	272.979	1691.67	461790	2679599		84	SUM_Lz14_BcF6-10002.tif:0888-0515	272.979	252.936	69046.2	400650
85	SUM_Lz14_BcF6-10000-1.tif:0824-0464	340.879	2863.73	976187	5664460		85	SUM_Lz14_BcF6-10002.tif:0824-0464	340.879	364.359	124202	720702
86	SUM_Lz14_BcF6-10000-1.tif:0779-0528	135.111	1268.82	171432	994758		86	SUM_Lz14_BcF6-10002.tif:0779-0528	135.111	214.374	28964.2	168069
87	SUM_Lz14_BcF6-10000-1.tif:0735-0472	217.143	2233.91	485077	2814729		87	SUM_Lz14_BcF6-10002.tif:0735-0472	217.143	649.916	141124	818894
88	SUM_Lz14_BcF6-10000-1.tif:0704-0432	241.959	1646.52	398391	2311717		88	SUM_Lz14_BcF6-10002.tif:0704-0432	241.959	3077.66	744668	4321041
89	SUM_Lz14_BcF6-10000-1.tif:0536-0422	260.571	1549.46	403744	2342784		89	SUM_Lz14_BcF6-10002.tif:0536-0422	260.571	358.668	93458.5	542306
90	SUM_Lz14_BcF6-10000-1.tif:0520-0461	303.827	2071.33	629327	3651758		90	SUM_Lz14_BcF6-10002.tif:0520-0461	303.827	506.49	153885	892941
91	SUM_Lz14_BcF6-10000-1.tif:0486-0455	126.839	1629.01	206622	1198952		91	SUM_Lz14_BcF6-10002.tif:0486-0455	126.839	780.458	98992.4	574417
92	SUM_Lz14_BcF6-10000-1.tif:0601-0136	257.814	1502.25	387301	2247366		92	SUM_Lz14_BcF6-10002.tif:0601-0136	257.814	133.943	34532.2	200378
93	SUM_Lz14_BcF6-10000-1.tif:0575-0650	241.959	1474.51	356770	2070210		93	SUM_Lz14_BcF6-10002.tif:0575-0650	241.959	229.569	55546.3	322315
94	SUM_Lz14_BcF6-10000-1.tif:0575-0650	241.959	1474.51	356770	2070210		94	SUM_Lz14_BcF6-10002.tif:0575-0650	241.959	229.569	55546.3	322315
95	SUM_Lz14_BcF6-10000-1.tif:0609-0615	307.791	1709.44	526149	3053053		95	SUM_Lz14_BcF6-10002.tif:0609-0615	307.791	1579.66	486206	2821276
96	SUM_Lz14_BcF6-10000-1.tif:0500-0643	454.965	1717.63	781463	4534550		96	SUM_Lz14_BcF6-10002.tif:0500-0643	454.965	378.902	172387	1000300
97	SUM_Lz14_BcF6-10000-1.tif:0564-0568	217.143	1781.67	386876	2244904		97	SUM_Lz14_BcF6-10002.tif:0564-0568	217.143	679.852	147625	856613
98	SUM_Lz14_BcF6-10000-1.tif:0574-0536	190.775	1890.93	360743	2093262		98	SUM_Lz14_BcF6-10002.tif:0574-0536	190.775	864.906	165003	957451
99	SUM_Lz14_BcF6-10000-1.tif:0111-0647	186.984	1263.55	236264	1370953		99	SUM_Lz14_BcF6-10002.tif:0111-0647	186.984	342.177	63981.6	371262
100	SUM_Lz14_BcF6-10000-1.tif:0325-0358	348.979	1592.31	555684	3224435		100	SUM_Lz14_BcF6-10002.tif:0325-0358	348.979	174.67	60956.2	353707
101	SUM_Lz14_BcF6-10000-1.tif:0291-0387	204.045	2064.93	421340	2444883		101	SUM_Lz14_BcF6-10002.tif:0291-0387	204.045	216.965	44270.5	256886
102	SUM_Lz14_BcF6-10000-1.tif:0260-0394	189.914	3141.06	596530	3461449		102	SUM_Lz14_BcF6-10002.tif:0260-0394	189.914	676.298	128438	745280
103	SUM_Lz14_BcF6-10000-1.tif:0241-0441	356.389	1543.54	550101	3192037		103	SUM_Lz14_BcF6-10002.tif:0241-0441	356.389	289.294	103101	598260
104	SUM_Lz14_BcF6-10000-1.tif:0734-0388	124.081	2943.16	365191	2119073		104	SUM_Lz14_BcF6-10002.tif:0734-0388	124.081	1245.22	154508	896557
105	SUM_Lz14_BcF6-10000-1.tif:0747-0411	172.335	5196.56	895551	5196558		105	SUM_Lz14_BcF6-10002.tif:0747-0411	172.335	3325.26	573060	3325262
106	SUM_Lz14_BcF6-10000-1.tif:0658-0605	111.329	5549.41	617809	3584921		106	SUM_Lz14_BcF6-10002.tif:0658-0605	111.329	2815.53	313449	1818829
107	SUM_Lz14_BcF6-10000-1.tif:0660-0629	140.281	5324.85	746976	4334431		107	SUM_Lz14_BcF6-10002.tif:0660-0629	140.281	2314.91	324739	1884341
108	SUM_Lz14_BcF6-10000-1.tif:0654-0498	259.192	2473.81	641194	3720617		108	SUM_Lz14_BcF6-10002.tif:0654-0498	259.192	243.178	63029.9	365740
109	SUM_Lz14_BcF6-10000-1.tif:0650-0532	233.17	2061.73	480734	2789524		109	SUM_Lz14_BcF6-10002.tif:0650-0532	233.17	335.701	78275.2	454203
110	SUM_Lz14_BcF6-10000-1.tif:0403-0640	183.365	1900.41	348469	2022038		110	SUM_Lz14_BcF6-10002.tif:0403-0640	183.365	452.246	82926	481190
111	SUM_Lz14_BcF6-10000-1.tif:0365-0649	348.29	2134.8	743529	4314429		111	SUM_Lz14_BcF6-10002.tif:0365-0649	348.29	1067.29	371727	2156996
112	SUM_Lz14_BcF6-10000-1.tif:0378-0607	202.666	1481.78	300307	1742571		112	SUM_Lz14_BcF6-10002.tif:0378-0607	202.666	5085.11	1.03058e+06	5980091
[truncated: 34 more columns]

## Sheet: 122219_5 more
Lz							PPO1									Lz							PPO1									Lz							PPO1									Lz
Cell	Sample	Area	Mean int	Int Den	Raw Int density		Cell	Sample	Area	Mean int	Int Den	Raw Int density				Cell	Sample	Area	Mean int	Int Den	Raw Int density		Cell	Sample	Area	Mean int	Int Den	Raw Int density				Cell	Sample	Area	Mean int	Int Den	Raw Int density		Cell	Sample	Area	Mean int	Int Den	Raw Int density				Cell	Sample
1	C1-SUM_lzGFP_BcF6_20X-1.tif:0001-0017	53.252	2448.06	130363	756450		1	C3-SUM_lzGFP_BcF6_20X-3.tif:0001-0017	53.252	1258.17	66999.8	388776				1	C1-SUM_lzGFP_BcF6_20X-4.tif:0003-0077	87.719	18048.5	1.58319e+06	9186692		1	C3-SUM_lzGFP_BcF6_20X-1.tif:0003-0077	87.719	2738.05	240178	1393668				1	C1-SUM_lzGFP_BcF6_20X-5.tif:0003-0232	57.388	8805.93	505352	2932374		1	C3-SUM_lzGFP_BcF6_20X-1.tif:0003-0232	57.388	2831.46	162491	942877				1	C1-SUM_lzGFP_BcF6_20X-6.tif:0005-0355
2	C1-SUM_lzGFP_BcF6_20X-1.tif:0003-0057	109.433	3184.26	348463	2022005		2	C3-SUM_lzGFP_BcF6_20X-3.tif:0003-0057	109.433	1123.22	122917	713244				2	C1-SUM_lzGFP_BcF6_20X-4.tif:0009-0323	66.004	8994.43	593673	3444868		2	C3-SUM_lzGFP_BcF6_20X-1.tif:0009-0323	66.004	3013.55	198908	1154190				2	C1-SUM_lzGFP_BcF6_20X-5.tif:0004-0245	88.236	11826.3	1.0435e+06	6055050		2	C3-SUM_lzGFP_BcF6_20X-1.tif:0004-0245	88.236	4193.05	369977	2146842				2	C1-SUM_lzGFP_BcF6_20X-6.tif:0006-0373
3	C1-SUM_lzGFP_BcF6_20X-1.tif:0004-0075	108.399	1617.38	175322	1017330		3	C3-SUM_lzGFP_BcF6_20X-3.tif:0004-0075	108.399	471.37	51096.1	296492				3	C1-SUM_lzGFP_BcF6_20X-4.tif:0010-0335	72.553	18386.6	1.33401e+06	7740771		3	C3-SUM_lzGFP_BcF6_20X-1.tif:0010-0335	72.553	3686.94	267499	1552203				3	C1-SUM_lzGFP_BcF6_20X-5.tif:0005-0285	78.757	8903.82	701240	4069046		3	C3-SUM_lzGFP_BcF6_20X-1.tif:0005-0285	78.757	2912.19	229356	1330869				3	C1-SUM_lzGFP_BcF6_20X-6.tif:0008-0438
4	C1-SUM_lzGFP_BcF6_20X-1.tif:0005-0084	138.902	3565.22	495218	2873569		4	C3-SUM_lzGFP_BcF6_20X-3.tif:0005-0084	138.902	281.345	39079.5	226764				4	C1-SUM_lzGFP_BcF6_20X-4.tif:0011-0373	155.446	20651.9	3.21027e+06	18628032		4	C3-SUM_lzGFP_BcF6_20X-1.tif:0011-0373	155.446	2708.44	421017	2443009				4	C1-SUM_lzGFP_BcF6_20X-5.tif:0006-0286	59.111	10045.4	593793	3445565		4	C3-SUM_lzGFP_BcF6_20X-1.tif:0006-0286	59.111	3039.88	179690	1042679				4	C1-SUM_lzGFP_BcF6_20X-6.tif:0009-0472
5	C1-SUM_lzGFP_BcF6_20X-1.tif:0006-0122	235.927	2417.13	570267	3309054		5	C3-SUM_lzGFP_BcF6_20X-3.tif:0006-0122	235.927	878.172	207185	1202218				5	C1-SUM_lzGFP_BcF6_20X-4.tif:0012-0407	287.8	14723.9	4.23752e+06	24588832		5	C3-SUM_lzGFP_BcF6_20X-1.tif:0012-0407	287.8	2961.45	852305	4945619				5	C1-SUM_lzGFP_BcF6_20X-5.tif:0007-0293	59.283	11987.7	710669	4123756		5	C3-SUM_lzGFP_BcF6_20X-1.tif:0007-0293	59.283	2999.79	177838	1031929				5	C1-SUM_lzGFP_BcF6_20X-6.tif:0010-0506
6	C1-SUM_lzGFP_BcF6_20X-1.tif:0007-0151	88.408	1580.32	139713	810705		6	C3-SUM_lzGFP_BcF6_20X-3.tif:0007-0151	88.408	257.363	22752.9	132027				6	C1-SUM_lzGFP_BcF6_20X-4.tif:0013-0428	194.911	15487.1	3.01861e+06	17515930		6	C3-SUM_lzGFP_BcF6_20X-1.tif:0013-0428	194.911	3102.26	604666	3508661				6	C1-SUM_lzGFP_BcF6_20X-5.tif:0009-0334	115.465	14155.3	1.63444e+06	9484058		6	C3-SUM_lzGFP_BcF6_20X-1.tif:0009-0334	115.465	3855.98	445229	2583506				6	C1-SUM_lzGFP_BcF6_20X-6.tif:0011-0523
7	C1-SUM_lzGFP_BcF6_20X-1.tif:0008-0173	166.821	1695.06	282771	1640818		7	C3-SUM_lzGFP_BcF6_20X-3.tif:0008-0173	166.821	320.819	53519.3	310553				7	C1-SUM_lzGFP_BcF6_20X-4.tif:0014-0441	120.635	876.404	105725	613483		7	C3-SUM_lzGFP_BcF6_20X-1.tif:0014-0441	120.635	2259.56	272581	1581692				7	C1-SUM_lzGFP_BcF6_20X-5.tif:0010-0338	165.614	10311	1.70765e+06	9908905		7	C3-SUM_lzGFP_BcF6_20X-1.tif:0010-0338	165.614	3397.27	562636	3264777				7	C1-SUM_lzGFP_BcF6_20X-6.tif:0012-0519
8	C1-SUM_lzGFP_BcF6_20X-1.tif:0009-0178	197.669	1528.42	302122	1753104		8	C3-SUM_lzGFP_BcF6_20X-3.tif:0009-0178	197.669	829.238	163914	951136				8	C1-SUM_lzGFP_BcF6_20X-4.tif:0015-0463	120.807	15748.2	1.90249e+06	11039471		8	C3-SUM_lzGFP_BcF6_20X-1.tif:0015-0463	120.807	4092.41	494391	2868776				8	C1-SUM_lzGFP_BcF6_20X-5.tif:0011-0365	76.345	7934.51	605757	3514989		8	C3-SUM_lzGFP_BcF6_20X-1.tif:0011-0365	76.345	2489.61	190068	1102897				8	C1-SUM_lzGFP_BcF6_20X-6.tif:0013-0537
9	C1-SUM_lzGFP_BcF6_20X-1.tif:0010-0196	166.821	1470.99	245392	1423923		9	C3-SUM_lzGFP_BcF6_20X-3.tif:0010-0196	166.821	300.834	50185.3	291207				9	C1-SUM_lzGFP_BcF6_20X-4.tif:0018-0545	150.276	17301	2.59993e+06	15086457		9	C3-SUM_lzGFP_BcF6_20X-1.tif:0018-0545	150.276	3982.36	598455	3472617				9	C1-SUM_lzGFP_BcF6_20X-5.tif:0012-0379	250.059	12602.5	3.15137e+06	18286264		9	C3-SUM_lzGFP_BcF6_20X-1.tif:0012-0379	250.059	3815.66	954138	5536518				9	C1-SUM_lzGFP_BcF6_20X-6.tif:0015-0538
10	C1-SUM_lzGFP_BcF6_20X-1.tif:0013-0252	149.932	1653.55	247920	1438591		10	C3-SUM_lzGFP_BcF6_20X-3.tif:0013-0252	149.932	342.475	51347.8	297953				10	C1-SUM_lzGFP_BcF6_20X-4.tif:0019-0546	74.794	15749.2	1.17794e+06	6835160		10	C3-SUM_lzGFP_BcF6_20X-1.tif:0019-0546	74.794	2252.67	168485	977658				10	C1-SUM_lzGFP_BcF6_20X-5.tif:0014-0421	97.025	1254.69	121736	706391		10	C3-SUM_lzGFP_BcF6_20X-1.tif:0014-0421	97.025	2462.05	238880	1386136				10	C1-SUM_lzGFP_BcF6_20X-6.tif:0016-0550
11	C1-SUM_lzGFP_BcF6_20X-1.tif:0014-0278	86.512	1460.44	126346	733139		11	C3-SUM_lzGFP_BcF6_20X-3.tif:0014-0278	86.512	275.908	23869.5	138506				11	C1-SUM_lzGFP_BcF6_20X-4.tif:0020-0548	129.079	11454.5	1.47854e+06	8579429		11	C3-SUM_lzGFP_BcF6_20X-1.tif:0020-0548	129.079	3039.59	392348	2276655				11	C1-SUM_lzGFP_BcF6_20X-5.tif:0015-0410	55.32	15206.6	841223	4881315		11	C3-SUM_lzGFP_BcF6_20X-1.tif:0015-0410	55.32	3117.84	172478	1000828				11	C1-SUM_lzGFP_BcF6_20X-6.tif:0017-0583
12	C1-SUM_lzGFP_BcF6_20X-1.tif:0015-0301	161.823	2102.43	340222	1974185		12	C3-SUM_lzGFP_BcF6_20X-3.tif:0015-0301	161.823	270.537	43779	254034				12	C1-SUM_lzGFP_BcF6_20X-4.tif:0022-0576	58.594	24175.1	1.41652e+06	8219528		12	C3-SUM_lzGFP_BcF6_20X-1.tif:0022-0576	58.594	2987.59	175055	1015780				12	C1-SUM_lzGFP_BcF6_20X-5.tif:0016-0422	114.258	12116.1	1.38437e+06	8033006		12	C3-SUM_lzGFP_BcF6_20X-1.tif:0016-0422	114.258	4564.36	521516	3026170				12	C1-SUM_lzGFP_BcF6_20X-6.tif:0018-0604
13	C1-SUM_lzGFP_BcF6_20X-1.tif:0016-0322	117.877	1847.18	217741	1263474		13	C3-SUM_lzGFP_BcF6_20X-3.tif:0016-0322	117.877	1054.28	124276	721129				13	C1-SUM_lzGFP_BcF6_20X-4.tif:0023-0596	149.415	22352.7	3.33982e+06	19379795		13	C3-SUM_lzGFP_BcF6_20X-1.tif:0023-0596	149.415	4585.5	685142	3975631				13	C1-SUM_lzGFP_BcF6_20X-5.tif:0018-0457	163.719	10159.4	1.66329e+06	9651470		13	C3-SUM_lzGFP_BcF6_20X-1.tif:0018-0457	163.719	3105.21	508380	2949949				13	C1-SUM_lzGFP_BcF6_20X-6.tif:0020-0616
14	C1-SUM_lzGFP_BcF6_20X-1.tif:0018-0357	69.279	1774.51	122936	713354		14	C3-SUM_lzGFP_BcF6_20X-3.tif:0018-0357	69.279	157.323	10899.2	63244				14	C1-SUM_lzGFP_BcF6_20X-4.tif:0024-0606	76.689	15670.7	1.20178e+06	6973482		14	C3-SUM_lzGFP_BcF6_20X-1.tif:0024-0606	76.689	2530.54	194065	1126091				14	C1-SUM_lzGFP_BcF6_20X-5.tif:0019-0499	352.598	16662.8	5.87527e+06	34092063		14	C3-SUM_lzGFP_BcF6_20X-1.tif:0019-0499	352.598	3680.07	1.29759e+06	7529427				14	C1-SUM_lzGFP_BcF6_20X-6.tif:0022-0638
15	C1-SUM_lzGFP_BcF6_20X-1.tif:0020-0410	163.202	2584.58	421807	2447593		15	C3-SUM_lzGFP_BcF6_20X-3.tif:0020-0410	163.202	311.479	50833.9	294971				15	C1-SUM_lzGFP_BcF6_20X-4.tif:0027-0669	158.032	17314.5	2.73624e+06	15877405		15	C3-SUM_lzGFP_BcF6_20X-1.tif:0027-0669	158.032	2232.01	352727	2046749				15	C1-SUM_lzGFP_BcF6_20X-5.tif:0020-0486	91.51	8082.53	739633	4291824		15	C3-SUM_lzGFP_BcF6_20X-1.tif:0020-0486	91.51	2679.24	245177	1422676				15	C1-SUM_lzGFP_BcF6_20X-6.tif:0023-0645
16	C1-SUM_lzGFP_BcF6_20X-1.tif:0022-0442	277.805	2652.87	736980	4276432		16	C3-SUM_lzGFP_BcF6_20X-3.tif:0022-0442	277.805	531.096	147541	856126				16	C1-SUM_lzGFP_BcF6_20X-4.tif:0028-0695	163.374	22852.9	3.73357e+06	21664583		16	C3-SUM_lzGFP_BcF6_20X-1.tif:0028-0695	163.374	4948.98	808535	4691637				16	C1-SUM_lzGFP_BcF6_20X-5.tif:0021-0553	309.514	14788.2	4.57716e+06	26559608		16	C3-SUM_lzGFP_BcF6_20X-1.tif:0021-0553	309.514	4892.19	1.5142e+06	8786364				16	C1-SUM_lzGFP_BcF6_20X-6.tif:0024-0662
17	C1-SUM_lzGFP_BcF6_20X-1.tif:0023-0452	104.78	2480.28	259883	1508008		17	C3-SUM_lzGFP_BcF6_20X-3.tif:0023-0452	104.78	668.433	70038.3	406407				17	C1-SUM_lzGFP_BcF6_20X-4.tif:0029-0723	168.372	12863.9	2.16592e+06	12568048		17	C3-SUM_lzGFP_BcF6_20X-1.tif:0029-0723	168.372	2718.34	457692	2655820				17	C1-SUM_lzGFP_BcF6_20X-5.tif:0022-0543	146.83	8469.05	1.24351e+06	7215629		17	C3-SUM_lzGFP_BcF6_20X-1.tif:0022-0543	146.83	2621.41	384900	2233438				17	C1-SUM_lzGFP_BcF6_20X-6.tif:0025-0680
18	C1-SUM_lzGFP_BcF6_20X-1.tif:0024-0496	124.426	1257.52	156468	907928		18	C3-SUM_lzGFP_BcF6_20X-3.tif:0024-0496	124.426	137.186	17069.5	99048				18	C1-SUM_lzGFP_BcF6_20X-4.tif:0030-0706	71.864	14479.6	1.04056e+06	6037997		18	C3-SUM_lzGFP_BcF6_20X-1.tif:0030-0706	71.864	2867.94	206101	1195932				18	C1-SUM_lzGFP_BcF6_20X-5.tif:0023-0559	74.104	10251.1	759646	4407953		18	C3-SUM_lzGFP_BcF6_20X-1.tif:0023-0559	74.104	2987.27	221370	1284528				18	C1-SUM_lzGFP_BcF6_20X-6.tif:0026-0681
19	C1-SUM_lzGFP_BcF6_20X-1.tif:0025-0520	130.113	2542.13	330764	1919307		19	C3-SUM_lzGFP_BcF6_20X-3.tif:0025-0520	130.113	192.636	25064.5	145440				19	C1-SUM_lzGFP_BcF6_20X-4.tif:0031-0750	117.705	11233.9	1.32229e+06	7672756		19	C3-SUM_lzGFP_BcF6_20X-1.tif:0031-0750	117.705	3111.66	366258	2125261				19	C1-SUM_lzGFP_BcF6_20X-5.tif:0025-0586	71.692	10828.5	776315	4504674		19	C3-SUM_lzGFP_BcF6_20X-1.tif:0025-0586	71.692	3614.66	259141	1503700				19	C1-SUM_lzGFP_BcF6_20X-6.tif:0028-0724
20	C1-SUM_lzGFP_BcF6_20X-1.tif:0026-0525	98.231	1385.43	136093	789696		20	C3-SUM_lzGFP_BcF6_20X-3.tif:0026-0525	98.231	588.591	57818	335497				20	C1-SUM_lzGFP_BcF6_20X-4.tif:0032-0783	70.657	18142.3	1.28189e+06	7438358		20	C3-SUM_lzGFP_BcF6_20X-1.tif:0032-0783	70.657	3717.58	262675	1524207				20	C1-SUM_lzGFP_BcF6_20X-5.tif:0026-0610	95.818	11178.1	1.07107e+06	6215026		20	C3-SUM_lzGFP_BcF6_20X-1.tif:0026-0610	95.818	3774.31	361649	2098517				20	C1-SUM_lzGFP_BcF6_20X-6.tif:0030-0811
21	C1-SUM_lzGFP_BcF6_20X-1.tif:0027-0530	177.85	1302.67	231679	1344351		21	C3-SUM_lzGFP_BcF6_20X-3.tif:0027-0530	177.85	1115.29	198355	1150982				21	C1-SUM_lzGFP_BcF6_20X-4.tif:0033-0790	103.401	12420.9	1.28434e+06	7452548		21	C3-SUM_lzGFP_BcF6_20X-1.tif:0033-0790	103.401	2641.66	273151	1584999				21	C1-SUM_lzGFP_BcF6_20X-5.tif:0027-0620	135.111	8758.79	1.18341e+06	6866890		21	C3-SUM_lzGFP_BcF6_20X-1.tif:0027-0620	135.111	3084.94	416809	2418592				21	C1-SUM_lzGFP_BcF6_20X-6.tif:0031-0820
22	C1-SUM_lzGFP_BcF6_20X-1.tif:0028-0541	229.551	2152.8	494177	2867533		22	C3-SUM_lzGFP_BcF6_20X-3.tif:0028-0541	229.551	690.625	158534	919913				22	C1-SUM_lzGFP_BcF6_20X-4.tif:0034-0835	101.333	16689.1	1.69116e+06	9813202		22	C3-SUM_lzGFP_BcF6_20X-1.tif:0034-0835	101.333	3449.28	349527	2028177				22	C1-SUM_lzGFP_BcF6_20X-5.tif:0028-0673	244.716	11880.7	2.9074e+06	16870582		22	C3-SUM_lzGFP_BcF6_20X-1.tif:0028-0673	244.716	3607.95	882923	5123283				22	C1-SUM_lzGFP_BcF6_20X-6.tif:0032-0937
23	C1-SUM_lzGFP_BcF6_20X-1.tif:0029-0541	227.483	1987.86	452205	2623981		23	C3-SUM_lzGFP_BcF6_20X-3.tif:0029-0541	227.483	268.575	61096.2	354519				23	C1-SUM_lzGFP_BcF6_20X-4.tif:0035-0937	52.735	18635.4	982730	5702429		23	C3-SUM_lzGFP_BcF6_20X-1.tif:0035-0937	52.735	2682.07	141438	820712				23	C1-SUM_lzGFP_BcF6_20X-5.tif:0029-0739	128.217	9411.06	1.20666e+06	7001828		23	C3-SUM_lzGFP_BcF6_20X-1.tif:0029-0739	128.217	3013.28	386355	2241880				23	C1-SUM_lzGFP_BcF6_20X-6.tif:0492-0133
24	C1-SUM_lzGFP_BcF6_20X-1.tif:0030-0554	145.968	2359.22	344370	1998258		24	C3-SUM_lzGFP_BcF6_20X-3.tif:0030-0554	145.968	1492.35	217835	1264021				24	C1-SUM_lzGFP_BcF6_20X-4.tif:0589-0731	576.979	4285.24	2.47249e+06	14346980		24	C3-SUM_lzGFP_BcF6_20X-1.tif:0589-0731	576.979	679.147	391854	2273785				24	C1-SUM_lzGFP_BcF6_20X-5.tif:0030-0736	65.832	13184.5	867967	5036498		24	C3-SUM_lzGFP_BcF6_20X-1.tif:0030-0736	65.832	3265.68	214986	1247489				24	C1-SUM_lzGFP_BcF6_20X-6.tif:0631-0139
25	C1-SUM_lzGFP_BcF6_20X-1.tif:0031-0569	407.228	2229.26	907818	5267743		25	C3-SUM_lzGFP_BcF6_20X-3.tif:0031-0569	407.228	489.132	199188	1155818				25	C1-SUM_lzGFP_BcF6_20X-4.tif:0699-0760	279.873	4547.64	1.27276e+06	7385365		25	C3-SUM_lzGFP_BcF6_20X-1.tif:0699-0760	279.873	682.794	191095	1108857				25	C1-SUM_lzGFP_BcF6_20X-5.tif:0031-0814	88.58	9400.81	832727	4832017		25	C3-SUM_lzGFP_BcF6_20X-1.tif:0031-0814	88.58	3033.32	268693	1559127				25	C1-SUM_lzGFP_BcF6_20X-6.tif:0574-0315
26	C1-SUM_lzGFP_BcF6_20X-1.tif:0033-0577	88.925	1409.81	125368	727464		26	C3-SUM_lzGFP_BcF6_20X-3.tif:0033-0577	88.925	300.328	26706.6	154969				26	C1-SUM_lzGFP_BcF6_20X-4.tif:0772-0587	232.997	16275.1	3.79205e+06	22003909		26	C3-SUM_lzGFP_BcF6_20X-1.tif:0772-0587	232.997	2572.42	599367	3477911				26	C1-SUM_lzGFP_BcF6_20X-5.tif:0032-0835	85.651	9452.23	809590	4697757		26	C3-SUM_lzGFP_BcF6_20X-1.tif:0032-0835	85.651	2836.88	242981	1409930				26	C1-SUM_lzGFP_BcF6_20X-6.tif:0546-0367
27	C1-SUM_lzGFP_BcF6_20X-1.tif:0034-0582	125.805	1763.87	221903	1287622		27	C3-SUM_lzGFP_BcF6_20X-3.tif:0034-0582	125.805	704.918	88682	514590				27	C1-SUM_lzGFP_BcF6_20X-4.tif:0744-0526	242.648	28905.7	7.01391e+06	40699202		27	C3-SUM_lzGFP_BcF6_20X-1.tif:0744-0526	242.648	6721.22	1.63089e+06	9463482				27	C1-SUM_lzGFP_BcF6_20X-5.tif:0258-0417	257.814	3557.36	917135	5321804		27	C3-SUM_lzGFP_BcF6_20X-1.tif:0258-0417	257.814	1099.53	283475	1644903				27	C1-SUM_lzGFP_BcF6_20X-6.tif:0467-0361
28	C1-SUM_lzGFP_BcF6_20X-1.tif:0035-0671	1412.81	2467.3	3.48582e+06	20226952		28	C3-SUM_lzGFP_BcF6_20X-3.tif:0035-0671	1412.81	839.651	1.18626e+06	6883462				28	C1-SUM_lzGFP_BcF6_20X-4.tif:0844-0562	248.163	15191.7	3.77002e+06	21876076		28	C3-SUM_lzGFP_BcF6_20X-1.tif:0844-0562	248.163	3031.32	752261	4365101				28	C1-SUM_lzGFP_BcF6_20X-5.tif:0250-0448	220.589	3236.23	713878	4142375		28	C3-SUM_lzGFP_BcF6_20X-1.tif:0250-0448	220.589	870.888	192108	1114736				28	C1-SUM_lzGFP_BcF6_20X-6.tif:0495-0864
29	C1-SUM_lzGFP_BcF6_20X-1.tif:0036-0622	252.299	1785.14	450389	2613443		29	C3-SUM_lzGFP_BcF6_20X-3.tif:0036-0622	252.299	310.538	78348.3	454627				29	C1-SUM_lzGFP_BcF6_20X-4.tif:0792-0526	220.589	23873.6	5.26626e+06	30558220		29	C3-SUM_lzGFP_BcF6_20X-1.tif:0792-0526	220.589	4498.87	992402	5758553				29	C1-SUM_lzGFP_BcF6_20X-5.tif:0329-0449	196.462	12282.6	2.41308e+06	14002207		29	C3-SUM_lzGFP_BcF6_20X-1.tif:0329-0449	196.462	2725.28	535414	3106813				29	C1-SUM_lzGFP_BcF6_20X-6.tif:0721-0629
30	C1-SUM_lzGFP_BcF6_20X-1.tif:0037-0630	121.841	1455.85	177383	1029288		30	C3-SUM_lzGFP_BcF6_20X-3.tif:0037-0630	121.841	723.407	88140.7	511449				30	C1-SUM_lzGFP_BcF6_20X-4.tif:0832-0516	275.737	11263.9	3.10587e+06	18022219		30	C3-SUM_lzGFP_BcF6_20X-1.tif:0832-0516	275.737	2261.64	623616	3618621				30	C1-SUM_lzGFP_BcF6_20X-5.tif:0477-0472	241.269	7253.66	1.75009e+06	10155128		30	C3-SUM_lzGFP_BcF6_20X-1.tif:0477-0472	241.269	2468.29	595524	3455612				30	C1-SUM_lzGFP_BcF6_20X-6.tif:0699-0606
31	C1-SUM_lzGFP_BcF6_20X-1.tif:0040-0745	350.53	3051.71	1.06972e+06	6207175		31	C3-SUM_lzGFP_BcF6_20X-3.tif:0040-0745	350.53	384.329	134719	781726				31	C1-SUM_lzGFP_BcF6_20X-4.tif:0722-0458	297.795	5552.76	1.65359e+06	9595175		31	C3-SUM_lzGFP_BcF6_20X-1.tif:0722-0458	297.795	1160.22	345508	2004858				31	C1-SUM_lzGFP_BcF6_20X-5.tif:0468-0511	281.251	8619.2	2.42416e+06	14066530		31	C3-SUM_lzGFP_BcF6_20X-1.tif:0468-0511	281.251	2347.16	660142	3830566				31	C1-SUM_lzGFP_BcF6_20X-6.tif:0630-0491
32	C1-SUM_lzGFP_BcF6_20X-1.tif:0041-0768	166.993	1456.27	243187	1411127		32	C3-SUM_lzGFP_BcF6_20X-3.tif:0041-0768	166.993	284.028	47430.7	275223				32	C1-SUM_lzGFP_BcF6_20X-4.tif:0803-0427	222.657	5071.38	1.12918e+06	6552224		32	C3-SUM_lzGFP_BcF6_20X-1.tif:0803-0427	222.657	972.929	216630	1257024				32	C1-SUM_lzGFP_BcF6_20X-5.tif:0543-0493	196.462	7385.64	1.451e+06	8419631		32	C3-SUM_lzGFP_BcF6_20X-1.tif:0543-0493	196.462	2282.28	448382	2601800				32	C1-SUM_lzGFP_BcF6_20X-6.tif:0587-0481
33	C1-SUM_lzGFP_BcF6_20X-1.tif:0042-0803	165.959	1350.08	224057	1300125		33	C3-SUM_lzGFP_BcF6_20X-3.tif:0042-0803	165.959	478.673	79440	460962				33	C1-SUM_lzGFP_BcF6_20X-4.tif:0682-0403	186.122	10165.9	1.8921e+06	10979198		33	C3-SUM_lzGFP_BcF6_20X-1.tif:0682-0403	186.122	3889.81	723980	4200996				33	C1-SUM_lzGFP_BcF6_20X-5.tif:0516-0522	303.31	13988	4.24271e+06	24618928		33	C3-SUM_lzGFP_BcF6_20X-1.tif:0516-0522	303.31	4052.2	1.22907e+06	7131879				33	C1-SUM_lzGFP_BcF6_20X-6.tif:0593-0515
34	C1-SUM_lzGFP_BcF6_20X-1.tif:0043-0800	79.274	1262.9	100116	580936		34	C3-SUM_lzGFP_BcF6_20X-3.tif:0043-0800	79.274	398.82	31616.1	183457				34	C1-SUM_lzGFP_BcF6_20X-4.tif:0666-0370	198.53	16944.3	3.36395e+06	19519815		34	C3-SUM_lzGFP_BcF6_20X-1.tif:0666-0370	198.53	3690.73	732722	4251722				34	C1-SUM_lzGFP_BcF6_20X-5.tif:0624-0529	268.843	12597.1	3.38665e+06	19651522		34	C3-SUM_lzGFP_BcF6_20X-1.tif:0624-0529	268.843	3076.31	827044	4799041				34	C1-SUM_lzGFP_BcF6_20X-6.tif:0575-0578
35	C1-SUM_lzGFP_BcF6_20X-1.tif:0044-0849	179.056	1739.4	311452	1807242		35	C3-SUM_lzGFP_BcF6_20X-3.tif:0044-0849	179.056	318.465	57023.2	330885				35	C1-SUM_lzGFP_BcF6_20X-4.tif:0594-0557	260.571	14821.9	3.86216e+06	22410732		35	C3-SUM_lzGFP_BcF6_20X-1.tif:0594-0557	260.571	2559.3	666880	3869666				35	C1-SUM_lzGFP_BcF6_20X-5.tif:0505-0678	318.476	4952.8	1.57735e+06	9152778		35	C3-SUM_lzGFP_BcF6_20X-1.tif:0505-0678	318.476	717.061	228367	1325129				35	C1-SUM_lzGFP_BcF6_20X-6.tif:0535-0592
36	C1-SUM_lzGFP_BcF6_20X-1.tif:0045-0894	92.716	1833.16	169964	986240		36	C3-SUM_lzGFP_BcF6_20X-3.tif:0045-0894	92.716	174.783	16205.2	94033				36	C1-SUM_lzGFP_BcF6_20X-4.tif:0650-0561	209.56	24533	5.14112e+06	29832071		36	C3-SUM_lzGFP_BcF6_20X-1.tif:0650-0561	209.56	3512.79	736140	4271555				36	C1-SUM_lzGFP_BcF6_20X-5.tif:0437-0843	379.827	2525.47	959241	5566132		36	C3-SUM_lzGFP_BcF6_20X-1.tif:0437-0843	379.827	644.629	244848	1420762				36	C1-SUM_lzGFP_BcF6_20X-6.tif:0680-0566
37	C1-SUM_lzGFP_BcF6_20X-1.tif:0046-0921	58.077	1514.56	87961	510406		37	C3-SUM_lzGFP_BcF6_20X-3.tif:0046-0921	58.077	418.184	24286.9	140928				37	C1-SUM_lzGFP_BcF6_20X-4.tif:0512-0568	223.347	18161	4.05619e+06	23536622		37	C3-SUM_lzGFP_BcF6_20X-1.tif:0512-0568	223.347	3241.03	723873	4200373				37	C1-SUM_lzGFP_BcF6_20X-5.tif:0822-0524	297.795	3566.86	1.0622e+06	6163537		37	C3-SUM_lzGFP_BcF6_20X-1.tif:0822-0524	297.795	870.292	259169	1503865				37	C1-SUM_lzGFP_BcF6_20X-6.tif:0797-0556
38	C1-SUM_lzGFP_BcF6_20X-1.tif:0047-0938	134.594	1651.64	222300	1289928		38	C3-SUM_lzGFP_BcF6_20X-3.tif:0047-0938	134.594	390.706	52586.6	305141				38	C1-SUM_lzGFP_BcF6_20X-4.tif:0202-0463	348.807	11667.4	4.06966e+06	23614794		38	C3-SUM_lzGFP_BcF6_20X-1.tif:0202-0463	348.807	2036.91	710486	4122697				38	C1-SUM_lzGFP_BcF6_20X-5.tif:0693-0473	292.97	7234.27	2.11942e+06	12298255		38	C3-SUM_lzGFP_BcF6_20X-1.tif:0693-0473	292.97	2874.26	842071	4886237				38	C1-SUM_lzGFP_BcF6_20X-6.tif:0896-0571
39	C1-SUM_lzGFP_BcF6_20X-1.tif:0049-0946	65.66	2065.19	135600	786839		39	C3-SUM_lzGFP_BcF6_20X-3.tif:0049-0946	65.66	335.992	22061.2	128013				39	C1-SUM_lzGFP_BcF6_20X-4.tif:0320-0306	115.809	16074.3	1.86155e+06	10801912		39	C3-SUM_lzGFP_BcF6_20X-1.tif:0320-0306	115.809	3739.75	433098	2513110				39	C1-SUM_lzGFP_BcF6_20X-5.tif:0614-0449	165.442	4935.74	816579	4738314		39	C3-SUM_lzGFP_BcF6_20X-1.tif:0614-0449	165.442	1076.89	178164	1033819				39	C1-SUM_lzGFP_BcF6_20X-6.tif:0849-0471
40	C1-SUM_lzGFP_BcF6_20X-1.tif:0050-0996	116.671	2000.73	233427	1354495		40	C3-SUM_lzGFP_BcF6_20X-3.tif:0050-0996	116.671	157.929	18425.8	106918				40	C1-SUM_lzGFP_BcF6_20X-4.tif:0466-0322	124.081	26216.5	3.25298e+06	18875856		40	C3-SUM_lzGFP_BcF6_20X-1.tif:0466-0322	124.081	5704.08	707770	4106937				40	C1-SUM_lzGFP_BcF6_20X-5.tif:0442-0341	281.251	7122.82	2.0033e+06	11624448		40	C3-SUM_lzGFP_BcF6_20X-1.tif:0442-0341	281.251	1803.3	507180	2942981				40	C1-SUM_lzGFP_BcF6_20X-6.tif:0546-0445
41	C1-SUM_lzGFP_BcF6_20X-1.tif:0031-0405	275.047	1731.73	476308	2763844		41	C3-SUM_lzGFP_BcF6_20X-3.tif:0031-0405	275.047	738.71	203180	1178981				41	C1-SUM_lzGFP_BcF6_20X-4.tif:0433-0518	183.365	24340.9	4.46327e+06	25898756		41	C3-SUM_lzGFP_BcF6_20X-1.tif:0433-0518	183.365	3359.75	616060	3574772				41	C1-SUM_lzGFP_BcF6_20X-5.tif:0394-0411	260.571	11615.1	3.02655e+06	17561985		41	C3-SUM_lzGFP_BcF6_20X-1.tif:0394-0411	260.571	2737.16	713225	4138586				41	C1-SUM_lzGFP_BcF6_20X-6.tif:0830-0535
42	C1-SUM_lzGFP_BcF6_20X-1.tif:0072-0371	144.762	1816.1	262902	1525523		42	C3-SUM_lzGFP_BcF6_20X-3.tif:0072-0371	144.762	642.93	93071.6	540061				42	C1-SUM_lzGFP_BcF6_20X-4.tif:0344-0508	198.53	12533.9	2.48836e+06	14439060		42	C3-SUM_lzGFP_BcF6_20X-1.tif:0344-0508	198.53	4390.07	871563	5057364				42	C1-SUM_lzGFP_BcF6_20X-5.tif:0398-0457	179.229	11922.2	2.13681e+06	12399133		42	C3-SUM_lzGFP_BcF6_20X-1.tif:0398-0457	179.229	3018.01	540914	3138730				42	C1-SUM_lzGFP_BcF6_20X-6.tif:0851-0565
43	C1-SUM_lzGFP_BcF6_20X-1.tif:0202-0588	231.619	1797.71	416383	2416123		43	C3-SUM_lzGFP_BcF6_20X-3.tif:0202-0588	231.619	416.129	96383.4	559278				43	C1-SUM_lzGFP_BcF6_20X-4.tif:0498-0536	82.721	18971.3	1.56933e+06	9106237		43	C3-SUM_lzGFP_BcF6_20X-1.tif:0498-0536	82.721	3407.41	281865	1635559				43	C1-SUM_lzGFP_BcF6_20X-5.tif:0361-0464	161.306	11858.3	1.91282e+06	11099415		43	C3-SUM_lzGFP_BcF6_20X-1.tif:0361-0464	161.306	3751.76	605181	3511645				43	C1-SUM_lzGFP_BcF6_20X-6.tif:0768-0498
44	C1-SUM_lzGFP_BcF6_20X-1.tif:0249-0592	210.938	1366.41	288229	1672491		44	C3-SUM_lzGFP_BcF6_20X-3.tif:0249-0592	210.938	458.408	96695.8	561091				44	C1-SUM_lzGFP_BcF6_20X-4.tif:0561-0510	253.678	19457	4.9358e+06	28640650		44	C3-SUM_lzGFP_BcF6_20X-1.tif:0561-0510	253.678	4297.84	1.09027e+06	6326418				44	C1-SUM_lzGFP_BcF6_20X-5.tif:0362-0431	124.081	16963.9	2.1049e+06	12213979		44	C3-SUM_lzGFP_BcF6_20X-1.tif:0362-0431	124.081	3691.72	458075	2658042				44	C1-SUM_lzGFP_BcF6_20X-6.tif:0702-0529
45	C1-SUM_lzGFP_BcF6_20X-1.tif:0257-0408	227.483	1818.47	413672	2400387		45	C3-SUM_lzGFP_BcF6_20X-3.tif:0257-0408	227.483	580.939	132153	766839				45	C1-SUM_lzGFP_BcF6_20X-4.tif:0548-0546	220.589	17697.5	3.90387e+06	22652738		45	C3-SUM_lzGFP_BcF6_20X-1.tif:0548-0546	220.589	3702.52	816736	4739225				45	C1-SUM_lzGFP_BcF6_20X-5.tif:0254-0512	297.795	5686.66	1.69346e+06	9826542		45	C3-SUM_lzGFP_BcF6_20X-1.tif:0254-0512	297.795	1039.9	309677	1796947				45	C1-SUM_lzGFP_BcF6_20X-6.tif:0521-0548
46	C1-SUM_lzGFP_BcF6_20X-1.tif:0221-0396	288.145	1039.76	299600	1738472		46	C3-SUM_lzGFP_BcF6_20X-3.tif:0221-0396	288.145	319.293	92002.6	533858				46	C1-SUM_lzGFP_BcF6_20X-4.tif:0755-0559	299.863	14869.2	4.45872e+06	25872366		46	C3-SUM_lzGFP_BcF6_20X-1.tif:0755-0559	299.863	2464.07	738886	4287488				46	C1-SUM_lzGFP_BcF6_20X-5.tif:0225-0537	155.102	6069.51	941392	5462557		46	C3-SUM_lzGFP_BcF6_20X-1.tif:0225-0537	155.102	1995.9	309567	1796307				46	C1-SUM_lzGFP_BcF6_20X-6.tif:0615-0299
47	C1-SUM_lzGFP_BcF6_20X-1.tif:0401-0386	227.483	3678.15	836716	4855161		47	C3-SUM_lzGFP_BcF6_20X-3.tif:0401-0386	227.483	872.995	198591	1152354				47	C1-SUM_lzGFP_BcF6_20X-4.tif:0685-0519	113.741	26576.5	3022850	17540511		47	C3-SUM_lzGFP_BcF6_20X-1.tif:0685-0519	113.741	4824.52	548747	3184181				47	C1-SUM_lzGFP_BcF6_20X-5.tif:0651-0225	428.081	2197.51	940713	5458621		47	C3-SUM_lzGFP_BcF6_20X-1.tif:0651-0225	428.081	641.621	274666	1593787				47	C1-SUM_lzGFP_BcF6_20X-6.tif:0325-0526
48	C1-SUM_lzGFP_BcF6_20X-1.tif:0604-0585	144.762	3469.14	502199	2914081		48	C3-SUM_lzGFP_BcF6_20X-3.tif:0604-0585	144.762	1073.78	155441	901971				48	C1-SUM_lzGFP_BcF6_20X-4.tif:0400-0459	143.383	7272.71	1.04278e+06	6050896		48	C3-SUM_lzGFP_BcF6_20X-1.tif:0400-0459	143.383	3574.18	512477	2973722				48	C1-SUM_lzGFP_BcF6_20X-5.tif:0595-0335	363.283	3253.71	1.18202e+06	6858815		48	C3-SUM_lzGFP_BcF6_20X-1.tif:0595-0335	363.283	883.805	321071	1863061
49	C1-SUM_lzGFP_BcF6_20X-1.tif:0598-0664	198.53	2563.45	508923	2953098		49	C3-SUM_lzGFP_BcF6_20X-3.tif:0598-0664	198.53	295.071	58580.6	339922				49	C1-SUM_lzGFP_BcF6_20X-4.tif:0369-0423	332.952	7210.19	2.40065e+06	13930096		49	C3-SUM_lzGFP_BcF6_20X-1.tif:0369-0423	332.952	1298.55	432356	2508806				49	C1-SUM_lzGFP_BcF6_20X-5.tif:0612-0375	351.564	1917.78	674223	3912272		49	C3-SUM_lzGFP_BcF6_20X-1.tif:0612-0375	351.564	490.121	172309	999847
50	C1-SUM_lzGFP_BcF6_20X-1.tif:0546-0554	176.471	2371.31	418468	2428218		50	C3-SUM_lzGFP_BcF6_20X-3.tif:0546-0554	176.471	875.79	154552	896809				50	C1-SUM_lzGFP_BcF6_20X-4.tif:0332-0462	272.979	17066.1	4.65869e+06	27032702		50	C3-SUM_lzGFP_BcF6_20X-1.tif:0332-0462	272.979	2598.68	709385	4116306				50	C1-SUM_lzGFP_BcF6_20X-5.tif:0428-0415	144.762	17711.4	2.56393e+06	14877542		50	C3-SUM_lzGFP_BcF6_20X-1.tif:0428-0415	144.762	5729.11	829355	4812451
51	C1-SUM_lzGFP_BcF6_20X-1.tif:0497-0660	183.365	2258	414038	2402516		51	C3-SUM_lzGFP_BcF6_20X-3.tif:0497-0660	183.365	692.24	126932	736543				51	C1-SUM_lzGFP_BcF6_20X-4.tif:0242-0433	289.523	7461.8	2.16036e+06	12535819		51	C3-SUM_lzGFP_BcF6_20X-1.tif:0242-0433	289.523	1269.79	367634	2133248				51	C1-SUM_lzGFP_BcF6_20X-5.tif:0660-0653	607.999	3277.97	1.993e+06	11564686		51	C3-SUM_lzGFP_BcF6_20X-1.tif:0660-0653	607.999	690.407	419767	2435755
52	C1-SUM_lzGFP_BcF6_20X-1.tif:0341-0588	99.265	5154.46	511658	2968968		52	C3-SUM_lzGFP_BcF6_20X-3.tif:0341-0588	99.265	1429.57	141906	823432				52	C1-SUM_lzGFP_BcF6_20X-4.tif:0420-0288	176.471	12108.2	2.13676e+06	12398823		52	C3-SUM_lzGFP_BcF6_20X-1.tif:0420-0288	176.471	2197.1	387725	2249828				52	C1-SUM_lzGFP_BcF6_20X-5.tif:0808-0774	441.178	2329.14	1.02757e+06	5962594		52	C3-SUM_lzGFP_BcF6_20X-1.tif:0808-0774	441.178	607.329	267940	1554761
53	C1-SUM_lzGFP_BcF6_20X-1.tif:0369-0600	143.383	3015.89	432427	2509219		53	C3-SUM_lzGFP_BcF6_20X-3.tif:0369-0600	143.383	542.299	77756.5	451193				53	C1-SUM_lzGFP_BcF6_20X-4.tif:0499-0370	202.666	14573.9	2.95364e+06	17138884		53	C3-SUM_lzGFP_BcF6_20X-1.tif:0499-0370	202.666	3136.87	635739	3688962				53	C1-SUM_lzGFP_BcF6_20X-5.tif:0809-0945	430.838	2538.21	1.09356e+06	6345514		53	C3-SUM_lzGFP_BcF6_20X-1.tif:0809-0945	430.838	711.566	306570	1778915
54	C1-SUM_lzGFP_BcF6_20X-1.tif:0421-0427	196.462	1356.77	266553	1546714		54	C3-SUM_lzGFP_BcF6_20X-3.tif:0421-0427	196.462	253.175	49739.4	288620				54	C1-SUM_lzGFP_BcF6_20X-4.tif:0534-0342	248.163	11473.1	2.8472e+06	16521255		54	C3-SUM_lzGFP_BcF6_20X-1.tif:0534-0342	248.163	2029.12	503551	2921927				54	C1-SUM_lzGFP_BcF6_20X-5.tif:0768-0485	380.516	3736.32	1.42173e+06	8249791		54	C3-SUM_lzGFP_BcF6_20X-1.tif:0768-0485	380.516	881.706	335504	1946807
55	C1-SUM_lzGFP_BcF6_20X-1.tif:0791-0453	170.267	1577.6	268613	1558665		55	C3-SUM_lzGFP_BcF6_20X-3.tif:0791-0453	170.267	489.358	83321.7	483486				55	C1-SUM_lzGFP_BcF6_20X-4.tif:0462-0456	363.972	12550.1	4.56788e+06	26505779		55	C3-SUM_lzGFP_BcF6_20X-1.tif:0462-0456	363.972	1902.76	692550	4018621				55	C1-SUM_lzGFP_BcF6_20X-5.tif:0379-0183	887.182	1054.17	935243	5426879		55	C3-SUM_lzGFP_BcF6_20X-1.tif:0379-0183	887.182	310.349	275336	1597677
56	C1-SUM_lzGFP_BcF6_20X-1.tif:0799-0500	235.755	1655.08	390194	2264153		56	C3-SUM_lzGFP_BcF6_20X-3.tif:0799-0500	235.755	535.66	126284	732783				56	C1-SUM_lzGFP_BcF6_20X-4.tif:0615-0491	175.782	12599.1	2.2147e+06	12851111		56	C3-SUM_lzGFP_BcF6_20X-1.tif:0615-0491	175.782	1351.99	237655	1379027				56	C1-SUM_lzGFP_BcF6_20X-5.tif:0891-0279	659.7	1258.96	830538	4819311		56	C3-SUM_lzGFP_BcF6_20X-1.tif:0891-0279	659.7	326.214	215204	1248749
57	C1-SUM_lzGFP_BcF6_20X-1.tif:0738-0466	231.619	2043.78	473377	2746838		57	C3-SUM_lzGFP_BcF6_20X-3.tif:0738-0466	231.619	785.24	181876	1055363				57	C1-SUM_lzGFP_BcF6_20X-4.tif:0529-0123	364.662	3999.91	1.45861e+06	8463807		57	C3-SUM_lzGFP_BcF6_20X-1.tif:0529-0123	364.662	642.114	234154	1358713				57	C1-SUM_lzGFP_BcF6_20X-5.tif:0675-0586	231.619	4539.57	1.05145e+06	6101186		57	C3-SUM_lzGFP_BcF6_20X-1.tif:0675-0586	231.619	1851.37	428812	2488243
58	C1-SUM_lzGFP_BcF6_20X-1.tif:0716-0610	193.016	3122.48	602688	3497182		58	C3-SUM_lzGFP_BcF6_20X-3.tif:0716-0610	193.016	446.991	86276.2	500630				58	C1-SUM_lzGFP_BcF6_20X-4.tif:0576-0620	303.31	4358.19	1.32188e+06	7670413		58	C3-SUM_lzGFP_BcF6_20X-1.tif:0576-0620	303.31	563.307	170857	991420				58	C1-SUM_lzGFP_BcF6_20X-5.tif:0732-0607	317.097	3007.32	953612	5533466		58	C3-SUM_lzGFP_BcF6_20X-1.tif:0732-0607	317.097	764.677	242477	1407006
59	C1-SUM_lzGFP_BcF6_20X-1.tif:0633-0638	125.46	2449.66	307335	1783352		59	C3-SUM_lzGFP_BcF6_20X-3.tif:0633-0638	125.46	713.319	89493.1	519296				59	C1-SUM_lzGFP_BcF6_20X-4.tif:0878-0501	379.138	2101.74	796850	4623836		59	C3-SUM_lzGFP_BcF6_20X-1.tif:0878-0501	379.138	497.881	188766	1095339				59	C1-SUM_lzGFP_BcF6_20X-5.tif:0580-0505	144.762	8908.91	1.28967e+06	7483487		59	C3-SUM_lzGFP_BcF6_20X-1.tif:0580-0505	144.762	2107.18	305040	1770035
60	C1-SUM_lzGFP_BcF6_20X-1.tif:0527-0591	113.741	3172.84	360883	2094075		60	C3-SUM_lzGFP_BcF6_20X-3.tif:0527-0591	113.741	1542.39	175433	1017975				60	C1-SUM_lzGFP_BcF6_20X-4.tif:0593-0351	170.267	15445.5	2.62986e+06	15260156		60	C3-SUM_lzGFP_BcF6_20X-1.tif:0593-0351	170.267	2777.64	472940	2744303				60	C1-SUM_lzGFP_BcF6_20X-5.tif:0526-0948	733.459	2301.44	1.68802e+06	9794945		60	C3-SUM_lzGFP_BcF6_20X-1.tif:0526-0948	733.459	370.94	272070	1578722
61	C1-SUM_lzGFP_BcF6_20X-1.tif:0475-0627	170.267	2822.23	480533	2788362		61	C3-SUM_lzGFP_BcF6_20X-3.tif:0475-0627	170.267	586.508	99863.2	579470				61	C1-SUM_lzGFP_BcF6_20X-4.tif:0544-0425	314.34	9372.32	2.94609e+06	17095113		61	C3-SUM_lzGFP_BcF6_20X-1.tif:0544-0425	314.34	1941.71	610356	3541679
62	C1-SUM_lzGFP_BcF6_20X-1.tif:0413-0588	144.762	2531.28	366432	2126272		62	C3-SUM_lzGFP_BcF6_20X-3.tif:0413-0588	144.762	844.214	122210	709140				62	C1-SUM_lzGFP_BcF6_20X-4.tif:0711-0127	396.371	1733.18	686982	3986310		62	C3-SUM_lzGFP_BcF6_20X-1.tif:0711-0127	396.371	318.26	126149	731997
63	C1-SUM_lzGFP_BcF6_20X-1.tif:0954-0363	314.34	869.269	273246	1585546		63	C3-SUM_lzGFP_BcF6_20X-3.tif:0954-0363	314.34	346.028	108770	631155				63	C1-SUM_lzGFP_BcF6_20X-4.tif:0606-0176	223.347	4271.9	954115	5536387		63	C3-SUM_lzGFP_BcF6_20X-1.tif:0606-0176	223.347	807.66	180388	1046727
64	C1-SUM_lzGFP_BcF6_20X-1.tif:0188-0217	392.925	468.601	184125	1068410		64	C3-SUM_lzGFP_BcF6_20X-3.tif:0188-0217	392.925	181.836	71447.6	414585				64	C1-SUM_lzGFP_BcF6_20X-4.tif:0561-0174	379.138	3404.02	1.29059e+06	7488842		64	C3-SUM_lzGFP_BcF6_20X-1.tif:0561-0174	379.138	581.285	220387	1278827
65	C1-SUM_lzGFP_BcF6_20X-1.tif:0503-0542	210.938	2235.66	471587	2736448		65	C3-SUM_lzGFP_BcF6_20X-3.tif:0503-0542	210.938	885.403	186766	1083733				65	C1-SUM_lzGFP_BcF6_20X-4.tif:0651-0163	327.437	2084.86	682662	3961242		65	C3-SUM_lzGFP_BcF6_20X-1.tif:0651-0163	327.437	427.807	140080	812833
																66	C1-SUM_lzGFP_BcF6_20X-4.tif:0623-0323	199.22	10253.3	2.04265e+06	11852784		66	C3-SUM_lzGFP_BcF6_20X-1.tif:0623-0323	199.22	1548.08	308409	1789585
																67	C1-SUM_lzGFP_BcF6_20X-4.tif:0302-0506	248.163	9451.57	2.34553e+06	13610261		67	C3-SUM_lzGFP_BcF6_20X-1.tif:0302-0506	248.163	2173.88	539476	3130385
																68	C1-SUM_lzGFP_BcF6_20X-4.tif:0625-0615	301.242	2805.39	845102	4903821		68	C3-SUM_lzGFP_BcF6_20X-1.tif:0625-0615	301.242	438.243	132017	766049
Parameters																69	C1-SUM_lzGFP_BcF6_20X-4.tif:0681-0449	292.97	3015.76	883529	5126799		69	C3-SUM_lzGFP_BcF6_20X-1.tif:0681-0449	292.97	649.544	190297	1104225
Default																70	C1-SUM_lzGFP_BcF6_20X-4.tif:0100-0443	281.251	2054.39	577801	3352772		70	C3-SUM_lzGFP_BcF6_20X-1.tif:0100-0443	281.251	389.531	109556	635714
50-200																71	C1-SUM_lzGFP_BcF6_20X-4.tif:0061-0621	491.5	1335.48	656390	3808795		71	C3-SUM_lzGFP_BcF6_20X-1.tif:0061-0621	491.5	267.808	131628	763788
0.1-1																72	C1-SUM_lzGFP_BcF6_20X-4.tif:0621-0226	344.671	3695.12	1.2736e+06	7390238		72	C3-SUM_lzGFP_BcF6_20X-1.tif:0621-0226	344.671	504.055	173733	1008110
start figure: PPO1																73	C1-SUM_lzGFP_BcF6_20X-4.tif:0773-0212	682.448	482.124	329025	1909213		73	C3-SUM_lzGFP_BcF6_20X-1.tif:0773-0212	682.448	239.756	163621	949432
																74	C1-SUM_lzGFP_BcF6_20X-4.tif:0366-0271	165.442	4473.08	740035	4294154		74	C3-SUM_lzGFP_BcF6_20X-1.tif:0366-0271	165.442	755.961	125068	725723
																75	C1-SUM_lzGFP_BcF6_20X-4.tif:0249-0297	217.143	3007.4	653034	3789319		75	C3-SUM_lzGFP_BcF6_20X-1.tif:0249-0297	217.143	453.321	98435.4	571185
																76	C1-SUM_lzGFP_BcF6_20X-4.tif:0290-0308	242.648	4093.53	993287	5763688		76	C3-SUM_lzGFP_BcF6_20X-1.tif:0290-0308	242.648	509.028	123515	716711
[truncated: 22 more columns]

## Sheet: PPO1_Lz_intensities
Cell ID	PPO1	Lz
SUM_Lz14_BcF6-10000.tif:0001-0155	1762.79	1974.45
SUM_Lz14_BcF6-10000.tif:0002-0196	2756.84	5387.84
SUM_Lz14_BcF6-10000.tif:0003-0237	2054.11	1591.72
SUM_Lz14_BcF6-10000.tif:0004-0257	2214.49	3538.28
SUM_Lz14_BcF6-10000.tif:0005-0343	2310.11	3411.42
SUM_Lz14_BcF6-10000.tif:0006-0386	3670.07	7069.31
SUM_Lz14_BcF6-10000.tif:0009-0569	1765.52	1544.09
SUM_Lz14_BcF6-10000.tif:0010-0583	2208.05	3578.46
SUM_Lz14_BcF6-10000.tif:0011-0603	1718.6	2431.73
SUM_Lz14_BcF6-10000.tif:0012-0629	2387.16	4392.71
SUM_Lz14_BcF6-10000.tif:0013-0635	2272.28	3914.03
SUM_Lz14_BcF6-10000.tif:0014-0643	2535.88	4049.36
SUM_Lz14_BcF6-10000.tif:0015-0644	5334.6	8267.4
SUM_Lz14_BcF6-10000.tif:0016-0649	2522.16	4221.76
SUM_Lz14_BcF6-10000.tif:0017-0671	2134.85	4142.16
SUM_Lz14_BcF6-10000.tif:0018-0690	4147.28	6539.32
SUM_Lz14_BcF6-10000.tif:0019-0710	1787.38	2517.35
SUM_Lz14_BcF6-10000.tif:0020-0721	2906.28	5073.86
SUM_Lz14_BcF6-10000.tif:0021-0742	1999.81	3308.55
SUM_Lz14_BcF6-10000.tif:0022-0754	1970.4	4386.84
SUM_Lz14_BcF6-10000.tif:0023-0758	1775.45	2634.05
SUM_Lz14_BcF6-10000.tif:0024-0763	2734.22	4129.6
SUM_Lz14_BcF6-10000.tif:0025-0769	1577.43	242.616
SUM_Lz14_BcF6-10000.tif:0026-0772	3218.79	4877.12
SUM_Lz14_BcF6-10000.tif:0027-0771	2897.58	4487.09
SUM_Lz14_BcF6-10000.tif:0028-0791	2037.24	3455
SUM_Lz14_BcF6-10000.tif:0029-0797	3218.32	5146.57
SUM_Lz14_BcF6-10000.tif:0030-0810	3678.27	6069.52
SUM_Lz14_BcF6-10000.tif:0031-0854	3011.53	5522.11
SUM_Lz14_BcF6-10000.tif:0032-0865	2793.01	5033.22
SUM_Lz14_BcF6-10000.tif:0033-0886	2898.78	5360.36
SUM_Lz14_BcF6-10000.tif:0034-0917	1978.21	3154.43
SUM_Lz14_BcF6-10000.tif:0847-0552	589.246	258.838
SUM_Lz14_BcF6-10000.tif:0668-0444	3341.15	6069.73
SUM_Lz14_BcF6-10000.tif:0665-0471	4101.18	6723.74
SUM_Lz14_BcF6-10000.tif:0687-0492	1715.02	4785.66
SUM_Lz14_BcF6-10000.tif:0718-0440	2142.61	3400.28
SUM_Lz14_BcF6-10000.tif:0717-0494	2536.21	4627.95
SUM_Lz14_BcF6-10000.tif:0737-0474	1955.3	3160.47
SUM_Lz14_BcF6-10000.tif:0931-0494	2836.49	4420.13
SUM_Lz14_BcF6-10000.tif:0711-0552	1324.38	2301.57
SUM_Lz14_BcF6-10000.tif:0693-0530	914.789	1144.05
SUM_Lz14_BcF6-10000.tif:0690-0557	900.724	1360.22
SUM_Lz14_BcF6-10000.tif:0543-0524	1072.96	1253.24
SUM_Lz14_BcF6-10000.tif:0566-0570	1507.51	2801.01
SUM_Lz14_BcF6-10000.tif:0544-0580	1587.71	3175.8
SUM_Lz14_BcF6-10000.tif:0625-0391	763.975	1494.88
SUM_Lz14_BcF6-10000.tif:0502-0495	483.479	702.498
SUM_Lz14_BcF6-10000.tif:0510-0592	1853.42	2692.42
SUM_Lz14_BcF6-10000.tif:0728-0687	635.525	423.478
SUM_Lz14_BcF6-20000.tif:0001-0255	3690.55	3566.04
SUM_Lz14_BcF6-20000.tif:0002-0309	2962.58	4273.44
SUM_Lz14_BcF6-20000.tif:0003-0353	3216.96	8888.56
SUM_Lz14_BcF6-20000.tif:0004-0451	3512.51	5295.7
SUM_Lz14_BcF6-20000.tif:0005-0467	2662.84	2641.97
SUM_Lz14_BcF6-20000.tif:0006-0563	3358.34	5188.01
SUM_Lz14_BcF6-20000.tif:0007-0599	3302.66	4690.13
SUM_Lz14_BcF6-20000.tif:0008-0635	4277.08	2354.8
SUM_Lz14_BcF6-20000.tif:0009-0676	3028.8	4278.05
SUM_Lz14_BcF6-20000.tif:0010-0746	2637.93	4318.56
SUM_Lz14_BcF6-20000.tif:0011-0768	3180.55	5218.99
SUM_Lz14_BcF6-20000.tif:0012-0798	3311	4934.11
SUM_Lz14_BcF6-20000.tif:0013-0799	3268.59	4993.58
SUM_Lz14_BcF6-20000.tif:0014-0856	2891.63	4018.92
SUM_Lz14_BcF6-20000.tif:0015-0900	2876.31	4292.86
SUM_Lz14_BcF6-20000.tif:0016-0973	3954.25	6081.07
SUM_Lz14_BcF6-20000.tif:0961-0466	1828.6	2970.46
SUM_Lz14_BcF6-20000.tif:0933-0631	1588.87	345.569
SUM_Lz14_BcF6-20000.tif:0673-0436	1792.95	2537.81
SUM_Lz14_BcF6-20000.tif:0439-0511	1358.54	1677.52
SUM_Lz14_BcF6-20000.tif:0490-0505	1119.23	2282.46
SUM_Lz14_BcF6-20000.tif:0651-0313	833.244	1389.28
SUM_Lz14_BcF6-20000.tif:0926-0444	1146.74	1759.69
SUM_Lz14_BcF6-20000.tif:0747-0505	1488.31	2908.56
SUM_Lz14_BcF6-20000.tif:0775-0516	1240.76	2836.23
SUM_Lz14_BcF6-20000.tif:0488-0664	2220.29	3368.69
SUM_Lz14_BcF6-20000.tif:0290-0559	865.946	1464.64
SUM_Lz14_BcF6-20000.tif:0282-0506	1366.53	2459.6
SUM_Lz14_BcF6-20000.tif:0242-0487	793.846	1302.32
SUM_Lz14_BcF6-20000.tif:0237-0616	1426.92	1536.15
SUM_Lz14_BcF6-20000.tif:0455-0432	2200.41	2924.6
SUM_Lz14_BcF6-20000.tif:0356-0433	3424.72	5298.92
SUM_Lz14_BcF6-20000.tif:0848-0537	3676.62	5748.51
SUM_Lz14_BcF6-20000.tif:0859-0510	2412.28	4808.47
SUM_Lz14_BcF6-20000.tif:0905-0546	4859.52	7206.27
SUM_Lz14_BcF6-20000.tif:0924-0577	2070.21	4045.09
SUM_Lz14_BcF6-20000.tif:0869-0641	2743.76	4409.42
SUM_Lz14_BcF6-20000.tif:0823-0633	2419.82	4166.34
SUM_Lz14_BcF6-20000.tif:0796-0631	2162.89	3831.44
SUM_Lz14_BcF6-20000.tif:0622-0546	2883.94	4345.41
SUM_Lz14_BcF6-20000.tif:0581-0437	2266.28	4168.72
SUM_Lz14_BcF6-20000.tif:0625-0451	2339.37	4352.21
SUM_Lz14_BcF6-20000.tif:0576-0491	3677.68	6835.38
SUM_Lz14_BcF6-20000.tif:0550-0441	1402.51	2338.5
SUM_Lz14_BcF6-20000.tif:0898-0487	1395.37	1561.05
SUM_Lz14_BcF6-20000.tif:0820-0461	1053.89	1972.17
SUM_Lz14_BcF6-20000.tif:0981-0521	868.673	1502.54
SUM_Lz14_BcF6-30000.tif:0001-0120	2857.05	5844.04
SUM_Lz14_BcF6-30000.tif:0002-0118	2361.15	4909.52
SUM_Lz14_BcF6-30000.tif:0003-0147	2467.88	4304.61
SUM_Lz14_BcF6-30000.tif:0004-0165	2792.89	4357.37
SUM_Lz14_BcF6-30000.tif:0005-0195	2442.32	4913.66
SUM_Lz14_BcF6-30000.tif:0006-0192	2544.23	7512.08
SUM_Lz14_BcF6-30000.tif:0007-0219	2981.7	6114.06
SUM_Lz14_BcF6-30000.tif:0008-0261	2405.03	7598.52
SUM_Lz14_BcF6-30000.tif:0009-0381	2837.6	7275.14
SUM_Lz14_BcF6-30000.tif:0010-0405	4600.13	5003.51
SUM_Lz14_BcF6-30000.tif:0011-0530	2224.54	6993.34
SUM_Lz14_BcF6-30000.tif:0012-0571	3060.45	7356.49
SUM_Lz14_BcF6-30000.tif:0014-0894	2158.94	439.551
SUM_Lz14_BcF6-30000.tif:0015-0915	2924.15	3353.54
SUM_Lz14_BcF6-30000.tif:0016-0940	2257.69	3922.83
SUM_Lz14_BcF6-30000.tif:0017-0988	2340.64	3957.15
SUM_Lz14_BcF6-30000.tif:0678-0566	2852.9	5294.3
SUM_Lz14_BcF6-30000.tif:0361-0574	5758.67	12277.5
SUM_Lz14_BcF6-30000.tif:0326-0564	2963.95	7811.44
SUM_Lz14_BcF6-30000.tif:0348-0501	1623.08	3865.28
SUM_Lz14_BcF6-30000.tif:0243-0559	3919.31	6494.91
SUM_Lz14_BcF6-30000.tif:0056-0562	2017.73	2926.1
SUM_Lz14_BcF6-30000.tif:0120-0347	1392.06	3565.08
SUM_Lz14_BcF6-30000.tif:0145-0361	1114.28	2492.13
SUM_Lz14_BcF6-30000.tif:0410-0403	1078.89	2261.46
SUM_Lz14_BcF6-30000.tif:0469-0440	1282.9	2864.59
SUM_Lz14_BcF6-30000.tif:0482-0468	926.579	1842.59
SUM_Lz14_BcF6-30000.tif:0880-0563	1243.94	2545.32
SUM_Lz14_BcF6-30000.tif:0950-0508	875.013	1992.31
SUM_Lz14_BcF6-30000.tif:0962-0539	1361.36	3112.52
SUM_Lz14_BcF6-30000.tif:0560-0443	750.14	1534.19
SUM_Lz14_BcF6-30000.tif:0162-0481	1276.13	2338.74
SUM_Lz14_BcF6-30000.tif:0118-0407	872.332	1796.73
SUM_Lz14_BcF6-30000.tif:0043-0484	1282.79	2752.33
SUM_Lz14_BcF6-30000.tif:0212-0511	2895.17	6506.6
SUM_Lz14_BcF6-30000.tif:0272-0508	3411.52	5820.25
SUM_Lz14_BcF6-30000.tif:0369-0546	3933.22	5294.33
SUM_Lz14_BcF6-30000.tif:0425-0510	1550.99	3282.74
SUM_Lz14_BcF6-30000.tif:0387-0503	1144.73	2308.49
SUM_Lz14_BcF6-30000.tif:0403-0465	325.411	981.951
SUM_Lz14_BcF6-30000.tif:0452-0419	720.553	1967.12
SUM_Lz14_BcF6-30000.tif:0487-0415	587.115	3025.41
SUM_Lz14_BcF6-30000.tif:0587-0438	611.265	952.45
SUM_Lz14_BcF6-30000.tif:0627-0432	659.541	791.648
SUM_Lz14_BcF6-30000.tif:0674-0448	287.647	655.353
SUM_Lz14_BcF6-30000.tif:0223-0375	2596.39	4291.57
SUM_Lz14_BcF6-30000.tif:0269-0426	2130.15	2915.9
SUM_Lz14_BcF6-150000.tif:0001-0032	4930.44	5670.21
SUM_Lz14_BcF6-150000.tif:0002-0054	2301.93	5369.16
SUM_Lz14_BcF6-150000.tif:0003-0145	4509.21	6215.14
SUM_Lz14_BcF6-150000.tif:0004-0157	3349.31	3913.09
SUM_Lz14_BcF6-150000.tif:0005-0173	4320.83	6522.37
SUM_Lz14_BcF6-150000.tif:0007-0215	2960.98	4250.61
SUM_Lz14_BcF6-150000.tif:0008-0215	2435.68	5201.97
SUM_Lz14_BcF6-150000.tif:0009-0220	3632.57	5759.28
SUM_Lz14_BcF6-150000.tif:0010-0226	3906.26	4889.74
SUM_Lz14_BcF6-150000.tif:0011-0261	4859.41	6409.05
SUM_Lz14_BcF6-150000.tif:0012-0261	2728.03	5940.6
SUM_Lz14_BcF6-150000.tif:0013-0268	2788.73	5254.78
SUM_Lz14_BcF6-150000.tif:0014-0266	4019.74	5070.66
SUM_Lz14_BcF6-150000.tif:0015-0281	5101.54	7955.05
SUM_Lz14_BcF6-150000.tif:0016-0278	2352.43	281.286
SUM_Lz14_BcF6-150000.tif:0017-0294	3390.14	6540.77
SUM_Lz14_BcF6-150000.tif:0018-0302	4469.69	5800.7
SUM_Lz14_BcF6-150000.tif:0019-0352	6944.18	9915.86
SUM_Lz14_BcF6-150000.tif:0020-0353	2443.7	2972.79
SUM_Lz14_BcF6-150000.tif:0021-0355	4013.61	5730.28
SUM_Lz14_BcF6-150000.tif:0022-0366	2138.56	2588.45
SUM_Lz14_BcF6-150000.tif:0023-0369	2774.43	4994.53
SUM_Lz14_BcF6-150000.tif:0024-0379	2959.94	3754.43
SUM_Lz14_BcF6-150000.tif:0025-0382	3514.93	7555.19
SUM_Lz14_BcF6-150000.tif:0027-0410	2906.13	3441.85
SUM_Lz14_BcF6-150000.tif:0028-0414	2697.5	5084.57
SUM_Lz14_BcF6-150000.tif:0029-0423	4884.06	7167.5
SUM_Lz14_BcF6-150000.tif:0030-0422	2348.6	3966.18
SUM_Lz14_BcF6-150000.tif:0032-0446	2316.31	2539.42
SUM_Lz14_BcF6-150000.tif:0033-0447	3279.16	4045.66
SUM_Lz14_BcF6-150000.tif:0034-0473	3898.65	6671.58
SUM_Lz14_BcF6-150000.tif:0035-0485	3402.5	5234.21
SUM_Lz14_BcF6-150000.tif:0036-0502	5400.98	6020.04
SUM_Lz14_BcF6-150000.tif:0037-0501	2415.49	5101.96
SUM_Lz14_BcF6-150000.tif:0038-0518	5080.19	8953.66
SUM_Lz14_BcF6-150000.tif:0039-0551	2554.24	5111.49
SUM_Lz14_BcF6-150000.tif:0040-0553	2943.03	5860.69
SUM_Lz14_BcF6-150000.tif:0041-0570	2261.01	3698.28
SUM_Lz14_BcF6-150000.tif:0042-0577	4266.23	6685.2
SUM_Lz14_BcF6-150000.tif:0043-0599	4050.48	6126.34
SUM_Lz14_BcF6-150000.tif:0044-0620	3694.61	4996.81
SUM_Lz14_BcF6-150000.tif:0045-0623	3805.17	2371.16
SUM_Lz14_BcF6-150000.tif:0046-0626	3212.8	5328.95
SUM_Lz14_BcF6-150000.tif:0047-0637	2652.35	3766.96
SUM_Lz14_BcF6-150000.tif:0048-0642	2971.84	3687.05
SUM_Lz14_BcF6-150000.tif:0049-0648	4768.94	6571.61
SUM_Lz14_BcF6-150000.tif:0050-0653	3217.04	5246.99
SUM_Lz14_BcF6-150000.tif:0051-0668	2602.19	3971.42
SUM_Lz14_BcF6-150000.tif:0052-0675	4100.36	6345.93
SUM_Lz14_BcF6-150000.tif:0053-0763	2792.1	4341.88
SUM_Lz14_BcF6-150000.tif:0054-0788	3139.65	4842.89
SUM_Lz14_BcF6-150000.tif:0055-0795	2867.15	4931.12
SUM_Lz14_BcF6-150000.tif:0056-0794	2579.64	5498.56
SUM_Lz14_BcF6-150000.tif:0057-0854	2774.34	4702.3
SUM_Lz14_BcF6-150000.tif:0058-0855	2426.67	6523.67
SUM_Lz14_BcF6-150000.tif:0059-0875	2120.15	3765.28
SUM_Lz14_BcF6-150000.tif:0060-0914	2705.76	3516.49
SUM_Lz14_BcF6-150000.tif:0061-0967	2585.95	2890
SUM_Lz14_BcF6-150000.tif:0159-0591	955.941	2601.3
SUM_Lz14_BcF6-150000.tif:0168-0673	1011.67	1683.84
SUM_Lz14_BcF6-150000.tif:0480-0884	976.583	1884.32
SUM_Lz14_BcF6-150000.tif:0415-0853	1300.19	1831.6
SUM_Lz14_BcF6-150000.tif:0865-0816	568.481	818.988
SUM_Lz14_BcF6-150000.tif:0931-0528	1116.19	1106.81
SUM_Lz14_BcF6-150000.tif:0546-0482	1114.35	2346.91
SUM_Lz14_BcF6-150000.tif:0528-0442	746.475	2597.47
SUM_Lz14_BcF6-150000.tif:0545-0461	1539.93	2826.47
SUM_Lz14_BcF6-150000.tif:0498-0639	1518.75	2115.02
SUM_Lz14_BcF6-150000.tif:0413-0420	983.54	1700.51
SUM_Lz14_BcF6-150000.tif:0349-0554	1130.45	2567.53
SUM_Lz14_BcF6-150000.tif:0216-0501	1074.24	2811.71
SUM_Lz14_BcF6-150000.tif:0177-0485	1477.63	1978.54
SUM_Lz14_BcF6-150000.tif:0191-0434	953.799	1341.31
SUM_Lz14_BcF6-150000.tif:0091-0414	3200.37	5045.58
SUM_Lz14_BcF6-150000.tif:0116-0437	4840.49	4679.21
SUM_Lz14_BcF6-150000.tif:0059-0503	315.261	428.483
SUM_Lz14_BcF6-150000.tif:0170-0622	795.054	569.403
SUM_Lz14_BcF6-150000.tif:0385-0590	1488.96	3015.57
SUM_Lz14_BcF6-150000.tif:0355-0598	876.811	1445.19
SUM_Lz14_BcF6-150000.tif:0245-0603	1414.81	2129.02
SUM_Lz14_BcF6-150000.tif:0519-0477	957.667	2932.82
SUM_Lz14_BcF6-150000.tif:0582-0591	1483.2	3111.1
SUM_Lz14_BcF6-150000.tif:0833-0486	914.461	2447.86
SUM_Lz14_BcF6-150000.tif:0421-0637	2278.28	3974.14
SUM_Lz14_BcF6-150000.tif:0458-0638	3246.59	6606.29
SUM_Lz14_BcF6-150000.tif:0595-0677	1397.72	2311.72
SUM_Lz14_BcF6-150000.tif:0602-0650	1268.92	2678.86
SUM_Lz14_BcF6-150000.tif:0582-0638	940.876	2191.72
SUM_Lz14_BcF6-150000.tif:0682-0487	2263.46	2459.9
SUM_Lz14_BcF6-150000.tif:0322-0605	4272.7	5330.58
SUM_Lz14_BcF6-160000.tif:0001-0024	2224.57	2613.18
SUM_Lz14_BcF6-160000.tif:0002-0044	2892.24	4328.48
SUM_Lz14_BcF6-160000.tif:0003-0050	2477.57	3204.34
SUM_Lz14_BcF6-160000.tif:0005-0072	2226.42	3987.77
SUM_Lz14_BcF6-160000.tif:0007-0103	3377.3	3317.56
SUM_Lz14_BcF6-160000.tif:0008-0185	1930.47	3627.21
SUM_Lz14_BcF6-160000.tif:0009-0219	4166.29	5045.37
SUM_Lz14_BcF6-160000.tif:0010-0241	3095.04	3715.52
SUM_Lz14_BcF6-160000.tif:0011-0262	2970.21	4429.11
SUM_Lz14_BcF6-160000.tif:0012-0302	3262.12	3549.86
SUM_Lz14_BcF6-160000.tif:0013-0319	2811.65	2460.18
SUM_Lz14_BcF6-160000.tif:0014-0328	2711.01	5170.98
SUM_Lz14_BcF6-160000.tif:0015-0331	2730.31	4432.12
SUM_Lz14_BcF6-160000.tif:0016-0359	3427.18	4463.99
SUM_Lz14_BcF6-160000.tif:0017-0379	3351.12	4406.2
SUM_Lz14_BcF6-160000.tif:0018-0389	2459.97	2695.72
SUM_Lz14_BcF6-160000.tif:0019-0397	3700.25	5385.26
SUM_Lz14_BcF6-160000.tif:0020-0405	1936.99	3433.2
SUM_Lz14_BcF6-160000.tif:0021-0403	2091.33	3352.76
SUM_Lz14_BcF6-160000.tif:0022-0421	2285.55	5668.78
SUM_Lz14_BcF6-160000.tif:0023-0423	2325.39	3328.18
SUM_Lz14_BcF6-160000.tif:0024-0438	2751.75	3441.21
SUM_Lz14_BcF6-160000.tif:0025-0477	2372.31	2962.19
SUM_Lz14_BcF6-160000.tif:0026-0484	3519.83	4778.75
SUM_Lz14_BcF6-160000.tif:0027-0540	2230.34	2811.33
SUM_Lz14_BcF6-160000.tif:0028-0572	2107.61	3629.77
SUM_Lz14_BcF6-160000.tif:0029-0597	3956.42	4768.89
SUM_Lz14_BcF6-160000.tif:0030-0601	2151.7	5031.18
SUM_Lz14_BcF6-160000.tif:0031-0607	2076.92	3875.67
SUM_Lz14_BcF6-160000.tif:0032-0653	1934.02	2840.8
SUM_Lz14_BcF6-160000.tif:0033-0661	2626.75	3177.97
SUM_Lz14_BcF6-160000.tif:0034-0663	2020.82	2431.1
SUM_Lz14_BcF6-160000.tif:0035-0763	3990.43	5602.77
SUM_Lz14_BcF6-160000.tif:0036-0773	2824.18	2251.41
SUM_Lz14_BcF6-160000.tif:0037-0778	2670.78	3307.54
SUM_Lz14_BcF6-160000.tif:0038-0807	2239.37	3341.18
SUM_Lz14_BcF6-160000.tif:0039-0811	2463.11	3175.1
SUM_Lz14_BcF6-160000.tif:0040-0832	2698.97	3929.17
SUM_Lz14_BcF6-160000.tif:0041-0911	2499.07	3479.73
SUM_Lz14_BcF6-160000.tif:0042-0914	3195.15	3658
SUM_Lz14_BcF6-160000.tif:0043-0973	3556.3	4408.4
SUM_Lz14_BcF6-160000.tif:0044-0997	3851.16	4989.57
SUM_Lz14_BcF6-160000.tif:0297-0690	3823.82	4354.55
SUM_Lz14_BcF6-160000.tif:0183-0203	680.594	1343.36
SUM_Lz14_BcF6-160000.tif:0218-0213	890.587	1420.89
SUM_Lz14_BcF6-160000.tif:0275-0227	959.421	2440.69
SUM_Lz14_BcF6-160000.tif:0584-0406	750.023	1267.44
SUM_Lz14_BcF6-160000.tif:0153-0188	333.843	873.207
SUM_Lz14_BcF6-160000.tif:0413-0676	1244.35	268.088
SUM_Lz14_BcF6-160000.tif:0561-0732	988.703	1308.27
SUM_Lz14_BcF6-160000.tif:0737-0812	632.23	1191.34
SUM_Lz14_BcF6-160000.tif:0848-0599	1127.66	3355.06
SUM_Lz14_BcF6-160000.tif:0904-0583	773.119	1449.15
SUM_Lz14_BcF6-160000.tif:0942-0590	381.115	659.848
SUM_Lz14_BcF6-160000.tif:0864-0654	601.577	1488.84
SUM_Lz14_BcF6-160000.tif:0863-0622	189.903	772.892
SUM_Lz14_BcF6-160000.tif:0132-0726	1097.45	1421.93
SUM_Lz14_BcF6-160000.tif:0151-0641	1116.89	3027.03
SUM_Lz14_BcF6-160000.tif:0134-0686	439.37	701.09
SUM_Lz14_BcF6-160000.tif:0163-0696	611.776	468.919
SUM_Lz14_BcF6-160000.tif:0231-0550	556.627	1186.01
SUM_Lz14_BcF6-160000.tif:0248-0524	645.943	1613.55
SUM_Lz14_BcF6-160000.tif:0629-0620	734.574	1259.96
SUM_Lz14_BcF6-160000.tif:0663-0671	694.647	752.118
SUM_Lz14_BcF6-160000.tif:0762-0719	364.61	662.132
SUM_Lz14_BcF6-160000.tif:0934-0691	430.508	1363.55
SUM_Lz14_BcF6-160000.tif:0824-0543	457.774	1011.05
SUM_Lz14_BcF6-160000.tif:0812-0590	539.706	886.75
SUM_Lz14_BcF6-160000.tif:0465-0718	597.607	242.938
SUM_Lz14_BcF6-160000.tif:0437-0740	422.48	536.272
SUM_Lz14_BcF6-160000.tif:0295-0765	445.924	653.803
SUM_Lz14_BcF6-160000.tif:0348-0666	511.158	729.897
SUM_Lz14_BcF6-160000.tif:0529-0733	413.742	828.642
SUM_Lz14_BcF6-160000.tif:0466-0590	566.331	320.304
SUM_Lz14_BcF6-160000.tif:0486-0609	611.969	978.079
SUM_Lz14_BcF6-160000.tif:0701-0557	3939.52	3653.82
SUM_Lz14_BcF6-170000.tif:0001-0178	1473.77	1566.09
SUM_Lz14_BcF6-170000.tif:0002-0210	1421.81	2500.57
SUM_Lz14_BcF6-170000.tif:0003-0229	1833.98	2385.17
SUM_Lz14_BcF6-170000.tif:0004-0240	2194.55	3348.08
SUM_Lz14_BcF6-170000.tif:0005-0263	1535.39	2682.48
SUM_Lz14_BcF6-170000.tif:0006-0318	1684.41	2368.27
SUM_Lz14_BcF6-170000.tif:0007-0382	1489.1	1923.43
SUM_Lz14_BcF6-170000.tif:0008-0429	1419.69	2519.68
SUM_Lz14_BcF6-170000.tif:0009-0437	1401.75	1996.43
SUM_Lz14_BcF6-170000.tif:0010-0465	2614.66	3439.41
SUM_Lz14_BcF6-170000.tif:0011-0490	1100.36	2159.75
SUM_Lz14_BcF6-170000.tif:0012-0492	1880.83	2754.99
SUM_Lz14_BcF6-170000.tif:0013-0545	1689.73	2918.42
SUM_Lz14_BcF6-170000.tif:0014-0572	2320.01	3138.41
SUM_Lz14_BcF6-170000.tif:0015-0620	1388.84	2009.02
SUM_Lz14_BcF6-170000.tif:0016-0644	1200.49	1266.42
SUM_Lz14_BcF6-170000.tif:0017-0679	1238.82	1337.43
SUM_Lz14_BcF6-170000.tif:0018-0690	1119.81	191.514
SUM_Lz14_BcF6-170000.tif:0019-0738	1120.05	558.314
SUM_Lz14_BcF6-170000.tif:0020-0746	2190.47	3381.89
SUM_Lz14_BcF6-170000.tif:0021-0795	1050.26	171.574
SUM_Lz14_BcF6-170000.tif:0022-0796	1179.85	487.68
SUM_Lz14_BcF6-170000.tif:0023-0809	2104.58	2674.52
SUM_Lz14_BcF6-170000.tif:0024-0880	1357.61	1810.16
SUM_Lz14_BcF6-170000.tif:0596-0430	1504.58	783.561
SUM_Lz14_BcF6-170000.tif:0298-0450	523.024	1242.78
SUM_Lz14_BcF6-170000.tif:0622-0752	543.999	1067.21
SUM_Lz14_BcF6-170000.tif:0965-1006	1288.68	1425.57
SUM_Lz14_BcF6-170000.tif:0227-0354	591.931	1257.66
SUM_Lz14_BcF6-120000.tif:0003-0182	2345.02	2996.93
SUM_Lz14_BcF6-120000.tif:0005-0298	4838.53	5934.99
SUM_Lz14_BcF6-120000.tif:0006-0305	2196.32	4531.28
SUM_Lz14_BcF6-120000.tif:0007-0322	2617.1	3346.72
SUM_Lz14_BcF6-120000.tif:0008-0342	2791	4921.48
SUM_Lz14_BcF6-120000.tif:0009-0356	3048.43	3915.31
SUM_Lz14_BcF6-120000.tif:0010-0354	2335.78	4001.52
SUM_Lz14_BcF6-120000.tif:0011-0372	2031.51	968.39
SUM_Lz14_BcF6-120000.tif:0012-0372	3914.94	4464.44
SUM_Lz14_BcF6-120000.tif:0013-0394	4750.59	8464.06
SUM_Lz14_BcF6-120000.tif:0014-0401	2996.75	4789.94
SUM_Lz14_BcF6-120000.tif:0015-0427	2579.06	3965.71
SUM_Lz14_BcF6-120000.tif:0016-0439	2400.19	3457.31
SUM_Lz14_BcF6-120000.tif:0017-0441	2288.47	2566.69
SUM_Lz14_BcF6-120000.tif:0018-0463	1689.33	413.229
SUM_Lz14_BcF6-120000.tif:0019-0461	2478.4	4226.26
SUM_Lz14_BcF6-120000.tif:0020-0470	2411.45	3914.6
SUM_Lz14_BcF6-120000.tif:0021-0494	2118.34	3172.21
SUM_Lz14_BcF6-120000.tif:0022-0511	4371.9	6121.39
SUM_Lz14_BcF6-120000.tif:0023-0511	3086.87	4554.41
SUM_Lz14_BcF6-120000.tif:0024-0540	2342.06	947.666
SUM_Lz14_BcF6-120000.tif:0025-0551	2511.87	3057.51
SUM_Lz14_BcF6-120000.tif:0026-0576	2180.76	1901.16
SUM_Lz14_BcF6-120000.tif:0027-0587	2270.42	4140.81
SUM_Lz14_BcF6-120000.tif:0028-0601	3030.46	4457.68
SUM_Lz14_BcF6-120000.tif:0029-0605	3451.07	3620.45
SUM_Lz14_BcF6-120000.tif:0030-0602	3890.96	3956.87
SUM_Lz14_BcF6-120000.tif:0031-0609	2729.11	3911.59
SUM_Lz14_BcF6-120000.tif:0032-0624	2762.65	3855.74
SUM_Lz14_BcF6-120000.tif:0033-0623	2630.03	3036.43
SUM_Lz14_BcF6-120000.tif:0034-0624	4567.45	7603.84
SUM_Lz14_BcF6-120000.tif:0036-0642	2081.25	4702.72
SUM_Lz14_BcF6-120000.tif:0037-0645	2728.02	3917.85
SUM_Lz14_BcF6-120000.tif:0038-0646	4355.97	6867.12
SUM_Lz14_BcF6-120000.tif:0039-0682	5549.57	5874.31
SUM_Lz14_BcF6-120000.tif:0040-0682	2448.77	4799.57
SUM_Lz14_BcF6-120000.tif:0041-0691	2802.1	4182.35
SUM_Lz14_BcF6-120000.tif:0042-0713	2627.72	3974.56
SUM_Lz14_BcF6-120000.tif:0043-0714	2442.31	3905.46
SUM_Lz14_BcF6-120000.tif:0044-0729	3640.16	5592.6
SUM_Lz14_BcF6-120000.tif:0045-0733	2501.99	3797.04
SUM_Lz14_BcF6-120000.tif:0046-0738	2289.22	2900.96
SUM_Lz14_BcF6-120000.tif:0047-0770	4579.51	7462.06
SUM_Lz14_BcF6-120000.tif:0049-0780	3512.77	5343.28
SUM_Lz14_BcF6-120000.tif:0050-0799	1692.72	404.172
SUM_Lz14_BcF6-120000.tif:0053-0855	4326.3	5782.73
SUM_Lz14_BcF6-120000.tif:0054-0865	2412.98	4230.27
SUM_Lz14_BcF6-120000.tif:0055-0860	2187.97	887.334
SUM_Lz14_BcF6-120000.tif:0056-0881	2512.96	292.053
SUM_Lz14_BcF6-120000.tif:0057-0893	2112.16	3643.29
SUM_Lz14_BcF6-120000.tif:0327-0400	3689.1	3707.73
SUM_Lz14_BcF6-120000.tif:0398-0583	1279.47	2154.72
SUM_Lz14_BcF6-120000.tif:0244-0807	847.738	1257.93
SUM_Lz14_BcF6-120000.tif:0240-0875	981.246	2235.79
SUM_Lz14_BcF6-120000.tif:0178-0405	3042.66	3441.22
SUM_Lz14_BcF6-120000.tif:0595-0324	992.79	2024.03
SUM_Lz14_BcF6-120000.tif:0675-0325	1298.75	3110.15
SUM_Lz14_BcF6-120000.tif:0822-0356	3056.93	3938.92
SUM_Lz14_BcF6-120000.tif:0819-0736	1059.88	1354.52
SUM_Lz14_BcF6-120000.tif:0629-0110	1011.63	2081.57
SUM_Lz14_BcF6-120000.tif:0455-0170	657.851	244.658
SUM_Lz14_BcF6-120000.tif:0787-0470	1082.93	2035.27
SUM_Lz14_BcF6-120000.tif:0734-0519	1125.24	2353.36
SUM_Lz14_BcF6-120000.tif:0730-0417	1362.35	2012.07
SUM_Lz14_BcF6-120000.tif:0766-0432	1021.05	1873.07
SUM_Lz14_BcF6-130000.tif:0001-0108	3920.99	6891.86
SUM_Lz14_BcF6-130000.tif:0002-0349	2696.83	4223.93
SUM_Lz14_BcF6-130000.tif:0003-0364	3497.49	5641.32
SUM_Lz14_BcF6-130000.tif:0004-0404	2399.53	2904.74
SUM_Lz14_BcF6-130000.tif:0005-0437	3036.71	2873.97
SUM_Lz14_BcF6-130000.tif:0006-0439	3548.93	5429.14
SUM_Lz14_BcF6-130000.tif:0007-0472	2924.28	2965.94
SUM_Lz14_BcF6-130000.tif:0008-0497	4339.09	6487.05
SUM_Lz14_BcF6-130000.tif:0009-0507	3062.55	3086.38
SUM_Lz14_BcF6-130000.tif:0010-0526	4356.77	8531.47
SUM_Lz14_BcF6-130000.tif:0011-0544	5044.27	6626.12
SUM_Lz14_BcF6-130000.tif:0012-0545	3284.03	4843.19
SUM_Lz14_BcF6-130000.tif:0013-0560	2867.77	3960.26
SUM_Lz14_BcF6-130000.tif:0014-0564	4577.14	7213.6
SUM_Lz14_BcF6-130000.tif:0015-0575	4394.1	7055.04
SUM_Lz14_BcF6-130000.tif:0016-0576	3657.26	5165.01
SUM_Lz14_BcF6-130000.tif:0017-0589	3471.3	4515.09
SUM_Lz14_BcF6-130000.tif:0018-0594	2418.19	3643.73
SUM_Lz14_BcF6-130000.tif:0019-0592	3123.34	5142.02
SUM_Lz14_BcF6-130000.tif:0020-0596	2237.72	3265.55
SUM_Lz14_BcF6-130000.tif:0021-0599	5089.54	7196.02
SUM_Lz14_BcF6-130000.tif:0022-0628	4971.14	8259.18
SUM_Lz14_BcF6-130000.tif:0023-0641	2756.88	4465.86
SUM_Lz14_BcF6-130000.tif:0024-0662	3313.26	3860.96
SUM_Lz14_BcF6-130000.tif:0025-0657	2768.68	3416.47
SUM_Lz14_BcF6-130000.tif:0026-0685	3378.5	4555.61
SUM_Lz14_BcF6-130000.tif:0027-0702	2860.61	5240.29
SUM_Lz14_BcF6-130000.tif:0028-0734	3182.42	4800.86
SUM_Lz14_BcF6-130000.tif:0029-0746	3440.52	2923.38
SUM_Lz14_BcF6-130000.tif:0030-0746	3420.59	7200.95
SUM_Lz14_BcF6-130000.tif:0031-0767	2780.12	4327.03
SUM_Lz14_BcF6-130000.tif:0032-0772	3764.9	6291.53
SUM_Lz14_BcF6-130000.tif:0033-0822	2256.48	4915.07
SUM_Lz14_BcF6-130000.tif:0468-0606	2573.44	4429.1
SUM_Lz14_BcF6-130000.tif:0475-0653	1439.84	3161.48
SUM_Lz14_BcF6-130000.tif:0532-0669	1020.21	1606.16
SUM_Lz14_BcF6-130000.tif:0551-0608	1222.79	3162.75
SUM_Lz14_BcF6-130000.tif:0370-0655	1203.35	1940.43
SUM_Lz14_BcF6-130000.tif:0396-0673	769.843	1646.51
SUM_Lz14_BcF6-130000.tif:0492-0811	1293.31	2392.09
SUM_Lz14_BcF6-130000.tif:0530-0812	1414.21	2265.23
SUM_Lz14_BcF6-130000.tif:0595-0796	432.15	999.426
SUM_Lz14_BcF6-130000.tif:0309-0810	441.352	1351.07
SUM_Lz14_BcF6-130000.tif:0334-0634	925.042	2731.76
SUM_Lz14_BcF6-130000.tif:0300-0612	298.632	1063.38
SUM_Lz14_BcF6-130000.tif:0623-0453	2142.36	3965.69
SUM_Lz14_BcF6-130000.tif:0632-0492	1295.39	2899.79
SUM_Lz14_BcF6-130000.tif:0784-0489	4045.29	4604.17
SUM_Lz14_BcF6-130000.tif:0704-0466	3595.71	4823.77
SUM_Lz14_BcF6-130000.tif:0671-0490	2042	3548.95
SUM_Lz14_BcF6-130000.tif:0714-0621	6200.43	8664.7
SUM_Lz14_BcF6-130000.tif:0640-0646	5317.74	6395.42
SUM_Lz14_BcF6-130000.tif:0614-0646	2926.69	6906.45
SUM_Lz14_BcF6-130000.tif:0622-0599	1393.34	2706.2
SUM_Lz14_BcF6-130000.tif:0600-0625	1278.3	3721.54
SUM_Lz14_BcF6-130000.tif:0401-0345	303.062	434.016
SUM_Lz14_BcF6-140000.tif:0001-0024	2662.87	2575.06
SUM_Lz14_BcF6-140000.tif:0002-0056	2354.93	2966.44
SUM_Lz14_BcF6-140000.tif:0003-0062	3485.52	3647.69
SUM_Lz14_BcF6-140000.tif:0004-0100	3231.94	4252.88
SUM_Lz14_BcF6-140000.tif:0005-0102	4345.44	5839.57
SUM_Lz14_BcF6-140000.tif:0006-0111	2263.98	3145.23
SUM_Lz14_BcF6-140000.tif:0007-0142	3708.8	6609.38
SUM_Lz14_BcF6-140000.tif:0008-0175	3038.24	3303.6
SUM_Lz14_BcF6-140000.tif:0009-0226	3873.23	4561.16
SUM_Lz14_BcF6-140000.tif:0010-0252	4261.35	4916.92
SUM_Lz14_BcF6-140000.tif:0011-0261	2755.39	3662.54
SUM_Lz14_BcF6-140000.tif:0012-0285	5564.6	7918.28
SUM_Lz14_BcF6-140000.tif:0013-0284	2247.96	1919.84
SUM_Lz14_BcF6-140000.tif:0014-0313	4263.1	4936.81
SUM_Lz14_BcF6-140000.tif:0016-0365	2308.96	2176.47
SUM_Lz14_BcF6-140000.tif:0017-0380	4497.77	4157.92
SUM_Lz14_BcF6-140000.tif:0018-0383	4814.14	6102.89
SUM_Lz14_BcF6-140000.tif:0019-0388	2320.56	2181.26
SUM_Lz14_BcF6-140000.tif:0020-0394	3416.88	4469.81
SUM_Lz14_BcF6-140000.tif:0021-0420	4258.76	4935.72
SUM_Lz14_BcF6-140000.tif:0022-0424	5368.42	6245.11
SUM_Lz14_BcF6-140000.tif:0023-0432	3172.77	2979.01
SUM_Lz14_BcF6-140000.tif:0024-0444	2461.21	1737.4
SUM_Lz14_BcF6-140000.tif:0025-0458	3725.42	5348.24
SUM_Lz14_BcF6-140000.tif:0026-0463	2848.72	3064.28
SUM_Lz14_BcF6-140000.tif:0027-0502	4416.55	5876.95
SUM_Lz14_BcF6-140000.tif:0028-0493	2761.21	2317.72
SUM_Lz14_BcF6-140000.tif:0029-0523	3974.41	3886.52
SUM_Lz14_BcF6-140000.tif:0031-0534	2616.44	3328.7
SUM_Lz14_BcF6-140000.tif:0032-0559	3789.69	4642.78
SUM_Lz14_BcF6-140000.tif:0033-0566	3114.48	4194.89
SUM_Lz14_BcF6-140000.tif:0034-0576	2984.68	3663.33
SUM_Lz14_BcF6-140000.tif:0035-0599	2971.5	3073.35
SUM_Lz14_BcF6-140000.tif:0036-0598	3327.97	4785.71
SUM_Lz14_BcF6-140000.tif:0037-0592	2708.45	3804.25
SUM_Lz14_BcF6-140000.tif:0038-0612	4521.47	7705.15
SUM_Lz14_BcF6-140000.tif:0039-0623	2696.79	714.169
SUM_Lz14_BcF6-140000.tif:0040-0633	2938.87	4548.44
SUM_Lz14_BcF6-140000.tif:0041-0643	3510.86	3528.45
SUM_Lz14_BcF6-140000.tif:0042-0639	3529.78	6299.11
SUM_Lz14_BcF6-140000.tif:0043-0652	2423.24	3148.57
SUM_Lz14_BcF6-140000.tif:0044-0664	2168.1	1878.42
SUM_Lz14_BcF6-140000.tif:0045-0664	2833.81	470.078
SUM_Lz14_BcF6-140000.tif:0046-0665	2865.67	3326.14
SUM_Lz14_BcF6-140000.tif:0047-0677	3368.42	3856.38
SUM_Lz14_BcF6-140000.tif:0048-0679	2858.57	4477.49
SUM_Lz14_BcF6-140000.tif:0049-0679	2442.89	3761.04
SUM_Lz14_BcF6-140000.tif:0050-0692	3877.85	3655.12
SUM_Lz14_BcF6-140000.tif:0051-0714	2521.45	2533.61
SUM_Lz14_BcF6-140000.tif:0052-0722	4427.12	3037.48
SUM_Lz14_BcF6-140000.tif:0053-0771	2650.96	2601.78
SUM_Lz14_BcF6-140000.tif:0054-0794	3034.87	2542.46
SUM_Lz14_BcF6-140000.tif:0055-0793	2657.05	3452.14
SUM_Lz14_BcF6-140000.tif:0056-0810	2715.3	3076.33
SUM_Lz14_BcF6-140000.tif:0057-0913	3088.35	4938.63
SUM_Lz14_BcF6-140000.tif:0058-0943	3879.85	5335.89
SUM_Lz14_BcF6-140000.tif:0059-0949	4572.88	5638.67
SUM_Lz14_BcF6-140000.tif:0060-0957	3672.03	5625.61
SUM_Lz14_BcF6-140000.tif:0061-0956	2202.53	3144.2
SUM_Lz14_BcF6-140000.tif:0062-0978	2779.65	3495.32
SUM_Lz14_BcF6-140000.tif:0770-0213	997.547	1030.37
SUM_Lz14_BcF6-140000.tif:0724-0119	1204.63	1540.2
SUM_Lz14_BcF6-140000.tif:0437-0125	1201.66	2647.27
SUM_Lz14_BcF6-140000.tif:0340-0674	1173.96	1759.29
SUM_Lz14_BcF6-140000.tif:0180-0787	1103.47	1850.9
SUM_Lz14_BcF6-140000.tif:0079-0954	1729.91	2042.83
SUM_Lz14_BcF6-140000.tif:0319-0527	1110.5	2329.56
SUM_Lz14_BcF6-140000.tif:0542-0435	2970.16	3273.64
SUM_Lz14_BcF6-140000.tif:0685-0362	1332.92	2083.68
SUM_Lz14_BcF6-140000.tif:0747-0369	1281.81	352.771
SUM_Lz14_BcF6-140000.tif:0778-0498	2062.61	2188.56
SUM_Lz14_BcF6-140000.tif:0884-0505	1505.32	1863.13
SUM_Lz14_BcF6-140000.tif:0850-0773	998.936	1960.76
SUM_Lz14_BcF6-140000.tif:0622-0842	1755.73	1695.97
SUM_Lz14_BcF6-140000.tif:0520-0886	1179.81	1758.28
SUM_Lz14_BcF6-140000.tif:0547-0591	2659.11	4527.53
SUM_Lz14_BcF6-140000.tif:0513-0610	4247.11	4928.78
SUM_Lz14_BcF6-140000.tif:0446-0614	5032.7	4517.86
SUM_Lz14_BcF6-140000.tif:0722-0561	1231.86	2871.05
SUM_Lz14_BcF6-140000.tif:0756-0553	1329.48	1985.59
SUM_Lz14_BcF6-140000.tif:0682-0493	1583.98	316.331
SUM_Lz14_BcF6-140000.tif:0484-0148	682.154	1092.46
SUM_Lz14_BcF6-140000.tif:0766-0428	1312.08	1379.97
SUM_Lz14_BcF6-140000.tif:0797-0405	996.534	1317.11
SUM_Lz14_BcF6-40000.tif:0001-0019	3014	6417.58
SUM_Lz14_BcF6-40000.tif:0002-0049	2834.62	4656.01
SUM_Lz14_BcF6-40000.tif:0003-0050	3527.92	7940.2
SUM_Lz14_BcF6-40000.tif:0004-0053	3683.24	4270.19
SUM_Lz14_BcF6-40000.tif:0005-0167	2466.01	4642.24
SUM_Lz14_BcF6-40000.tif:0006-0218	2492.94	4512.03
SUM_Lz14_BcF6-40000.tif:0007-0257	2456.28	4680.99
SUM_Lz14_BcF6-40000.tif:0008-0288	2476.91	200.43
SUM_Lz14_BcF6-40000.tif:0009-0295	3742.89	6340.26
SUM_Lz14_BcF6-40000.tif:0010-0347	4310.01	7670.79
SUM_Lz14_BcF6-40000.tif:0011-0366	2745.32	4166.51
SUM_Lz14_BcF6-40000.tif:0012-0413	4314.98	7651.77
SUM_Lz14_BcF6-40000.tif:0013-0427	2277.64	3529.44
SUM_Lz14_BcF6-40000.tif:0014-0460	3348.67	7519.4
SUM_Lz14_BcF6-40000.tif:0015-0498	2469.37	5860.65
SUM_Lz14_BcF6-40000.tif:0016-0514	4176.43	6438.21
SUM_Lz14_BcF6-40000.tif:0017-0517	3728.45	6113.69
SUM_Lz14_BcF6-40000.tif:0018-0520	3207.89	6383.57
SUM_Lz14_BcF6-40000.tif:0019-0550	2157.66	5426.19
SUM_Lz14_BcF6-40000.tif:0021-0559	3739.4	8613.06
SUM_Lz14_BcF6-40000.tif:0022-0578	3876.43	9388
SUM_Lz14_BcF6-40000.tif:0023-0585	2852.05	5710.57
SUM_Lz14_BcF6-40000.tif:0024-0625	4173.56	8597.35
SUM_Lz14_BcF6-40000.tif:0025-0641	3593.69	5061.41
SUM_Lz14_BcF6-40000.tif:0026-0642	2563.31	4830.19
SUM_Lz14_BcF6-40000.tif:0027-0652	3220.57	6525.24
SUM_Lz14_BcF6-40000.tif:0028-0682	4174.99	8243.12
SUM_Lz14_BcF6-40000.tif:0029-0683	3388.17	7480.97
SUM_Lz14_BcF6-40000.tif:0030-0701	4320.8	7556.93
SUM_Lz14_BcF6-40000.tif:0031-0710	3262.29	6889.51
SUM_Lz14_BcF6-40000.tif:0032-0708	3201.71	7192.36
SUM_Lz14_BcF6-40000.tif:0033-0726	3180.64	7081.14
SUM_Lz14_BcF6-40000.tif:0034-0733	3019.52	5119.13
SUM_Lz14_BcF6-40000.tif:0035-0735	3465.49	8100.74
SUM_Lz14_BcF6-40000.tif:0036-0759	2361.43	5617.05
SUM_Lz14_BcF6-40000.tif:0037-0760	2725.92	5289.18
SUM_Lz14_BcF6-40000.tif:0038-0770	3330.45	6627.6
SUM_Lz14_BcF6-40000.tif:0039-0771	3669.85	8116.24
SUM_Lz14_BcF6-40000.tif:0040-0767	3438.77	8102.99
SUM_Lz14_BcF6-40000.tif:0041-0795	3750.26	8319.01
SUM_Lz14_BcF6-40000.tif:0042-0792	4818.61	9711.66
SUM_Lz14_BcF6-40000.tif:0043-0818	4958.08	10899.6
SUM_Lz14_BcF6-40000.tif:0044-0815	2783.94	4244.22
SUM_Lz14_BcF6-40000.tif:0045-0824	2490.2	4898.79
SUM_Lz14_BcF6-40000.tif:0046-0829	2524.33	5758.45
SUM_Lz14_BcF6-40000.tif:0047-0835	4799.63	9201.53
SUM_Lz14_BcF6-40000.tif:0048-0868	4260.47	7129.54
SUM_Lz14_BcF6-40000.tif:0049-0877	2720.54	3160.88
SUM_Lz14_BcF6-40000.tif:0050-0880	2523.8	2758.57
SUM_Lz14_BcF6-40000.tif:0051-0904	2667.14	6136.31
SUM_Lz14_BcF6-40000.tif:0052-0935	3424.54	5652.37
SUM_Lz14_BcF6-40000.tif:0053-0933	2212.34	5471.44
SUM_Lz14_BcF6-40000.tif:0054-0955	3359.51	5530.74
SUM_Lz14_BcF6-40000.tif:0055-0993	2567.28	6085.11
SUM_Lz14_BcF6-40000.tif:0498-0438	3882.87	5866.88
SUM_Lz14_BcF6-40000.tif:0517-0459	5567.29	6974.54
SUM_Lz14_BcF6-40000.tif:0539-0434	3522.55	4735.91
SUM_Lz14_BcF6-40000.tif:0585-0465	3241.09	6325.53
SUM_Lz14_BcF6-40000.tif:0585-0417	6526.4	10474.8
SUM_Lz14_BcF6-40000.tif:0443-0469	1455.43	4075.51
SUM_Lz14_BcF6-40000.tif:0351-0421	992.772	1654.51
SUM_Lz14_BcF6-40000.tif:0172-0497	1307.28	2108.24
SUM_Lz14_BcF6-40000.tif:0176-0534	904.205	1166.75
SUM_Lz14_BcF6-40000.tif:0095-0433	649.63	2012.59
SUM_Lz14_BcF6-40000.tif:0044-0518	1183	3476.44
SUM_Lz14_BcF6-40000.tif:0198-0370	1082.86	2724.3
SUM_Lz14_BcF6-40000.tif:0630-0327	1176.3	2051.11
SUM_Lz14_BcF6-40000.tif:0828-0351	1070.62	2243.06
SUM_Lz14_BcF6-40000.tif:0756-0343	3388.67	6215.76
SUM_Lz14_BcF6-40000.tif:0787-0352	2583.91	5280.39
SUM_Lz14_BcF6-40000.tif:0762-0413	1468.84	3774.59
SUM_Lz14_BcF6-40000.tif:0667-0708	1282.37	3507.96
SUM_Lz14_BcF6-40000.tif:0672-0649	3859.69	7917.03
SUM_Lz14_BcF6-40000.tif:0676-0676	1986.05	4369.77
SUM_Lz14_BcF6-40000.tif:0613-0458	1266.87	3654.6
SUM_Lz14_BcF6-40000.tif:0878-0660	967.027	2536.85
SUM_Lz14_BcF6-60000.tif:0002-0127	3362.43	4776.15
SUM_Lz14_BcF6-60000.tif:0003-0131	3473.67	5381.88
SUM_Lz14_BcF6-60000.tif:0004-0156	4015.65	5612.81
SUM_Lz14_BcF6-60000.tif:0005-0191	2798.12	3362.89
SUM_Lz14_BcF6-60000.tif:0006-0197	3712.35	5117.61
SUM_Lz14_BcF6-60000.tif:0007-0215	2976.05	5270.3
SUM_Lz14_BcF6-60000.tif:0008-0216	2634.11	4944.56
SUM_Lz14_BcF6-60000.tif:0009-0229	2649.36	4552.41
SUM_Lz14_BcF6-60000.tif:0010-0265	3407.26	5297.12
SUM_Lz14_BcF6-60000.tif:0011-0274	2814.68	4615.73
SUM_Lz14_BcF6-60000.tif:0013-0315	4974.69	8500.28
SUM_Lz14_BcF6-60000.tif:0014-0337	3742.66	6362.28
SUM_Lz14_BcF6-60000.tif:0015-0337	3984.76	8050.23
SUM_Lz14_BcF6-60000.tif:0016-0358	3836.55	7733.34
SUM_Lz14_BcF6-60000.tif:0017-0381	4277.09	7738.52
SUM_Lz14_BcF6-60000.tif:0018-0395	4697.73	7574.15
SUM_Lz14_BcF6-60000.tif:0020-0418	4294.23	7150.36
SUM_Lz14_BcF6-60000.tif:0021-0422	3272.96	6034.25
SUM_Lz14_BcF6-60000.tif:0024-0462	3878.57	7132.34
SUM_Lz14_BcF6-60000.tif:0026-0488	4957.99	7571.42
SUM_Lz14_BcF6-60000.tif:0027-0492	3640.54	4107.14
SUM_Lz14_BcF6-60000.tif:0028-0509	3967.03	6072.97
SUM_Lz14_BcF6-60000.tif:0029-0514	2753.71	5932.05
SUM_Lz14_BcF6-60000.tif:0030-0527	5337.03	7133.3
SUM_Lz14_BcF6-60000.tif:0031-0534	3364.84	5257.12
SUM_Lz14_BcF6-60000.tif:0032-0542	3085.6	4507.64
SUM_Lz14_BcF6-60000.tif:0033-0543	4422.44	7869.98
SUM_Lz14_BcF6-60000.tif:0034-0561	4000.08	7378.17
SUM_Lz14_BcF6-60000.tif:0036-0615	4257.4	6673.64
SUM_Lz14_BcF6-60000.tif:0037-0649	3138.26	5454.08
SUM_Lz14_BcF6-60000.tif:0038-0657	4052.01	6886.88
SUM_Lz14_BcF6-60000.tif:0039-0676	2832.37	4493.02
SUM_Lz14_BcF6-60000.tif:0040-0690	4126.99	6704.03
SUM_Lz14_BcF6-60000.tif:0041-0691	2879.81	3553.74
SUM_Lz14_BcF6-60000.tif:0042-0701	4824.19	7574.43
SUM_Lz14_BcF6-60000.tif:0043-0731	4263.54	7191.48
SUM_Lz14_BcF6-60000.tif:0044-0751	4251.3	5642.59
SUM_Lz14_BcF6-60000.tif:0045-0765	3406.3	3971.54
SUM_Lz14_BcF6-60000.tif:0046-0771	3196.22	5973.52
SUM_Lz14_BcF6-60000.tif:0047-0779	4136.74	8868.75
SUM_Lz14_BcF6-60000.tif:0048-0779	3980.68	6722.59
SUM_Lz14_BcF6-60000.tif:0049-0791	4871.98	7364.53
SUM_Lz14_BcF6-60000.tif:0050-0816	3628.54	5419.81
SUM_Lz14_BcF6-60000.tif:0051-0831	3520.22	2482.88
SUM_Lz14_BcF6-60000.tif:0052-0860	4247.21	6961.34
SUM_Lz14_BcF6-60000.tif:0053-0877	2440.37	6680.16
SUM_Lz14_BcF6-60000.tif:0054-0954	3961.84	6280.86
SUM_Lz14_BcF6-60000.tif:0055-0956	3583.01	5426.58
SUM_Lz14_BcF6-60000.tif:0056-0961	4826.34	6364.98
SUM_Lz14_BcF6-60000.tif:0057-0978	4081.88	5481.37
SUM_Lz14_BcF6-60000.tif:0677-0651	2037.31	3949.44
SUM_Lz14_BcF6-60000.tif:0660-0630	2110.36	5061.05
SUM_Lz14_BcF6-60000.tif:0635-0642	1840.27	3543.32
SUM_Lz14_BcF6-60000.tif:0617-0619	1909.8	3520.39
SUM_Lz14_BcF6-60000.tif:0597-0638	1862.64	3970.59
SUM_Lz14_BcF6-60000.tif:0552-0864	1267.77	2050.41
SUM_Lz14_BcF6-60000.tif:0595-0901	564.299	1069.97
SUM_Lz14_BcF6-60000.tif:0485-0898	1741.79	3075.98
SUM_Lz14_BcF6-60000.tif:0628-0827	831.05	1552.06
SUM_Lz14_BcF6-60000.tif:0714-0851	881.338	1452.91
SUM_Lz14_BcF6-60000.tif:0869-0427	1112.9	2435.65
SUM_Lz14_BcF6-60000.tif:0815-0392	1446.21	2435.73
SUM_Lz14_BcF6-60000.tif:0809-0417	1736.57	4093.8
SUM_Lz14_BcF6-60000.tif:0651-0395	2055.18	3882.24
SUM_Lz14_BcF6-60000.tif:0356-0425	1827.65	3311.97
SUM_Lz14_BcF6-60000.tif:0477-0502	4768.35	5358
SUM_Lz14_BcF6-60000.tif:0394-0637	4458.14	6372.57
SUM_Lz14_BcF6-60000.tif:0379-0582	4109.96	7460.07
SUM_Lz14_BcF6-60000.tif:0583-0671	2587.47	6906.12
SUM_Lz14_BcF6-60000.tif:0568-0695	2792.61	5413.6
SUM_Lz14_BcF6-60000.tif:0816-0652	1420.88	2548.26
SUM_Lz14_BcF6-60000.tif:0586-0423	1205.85	2790.69
SUM_Lz14_BcF6-60000.tif:0601-0393	2095.71	3819.78
SUM_Lz14_BcF6-60000.tif:0579-0399	1738.44	3532.96
SUM_Lz14_BcF6-60000.tif:0555-0394	2877.06	3994.11
SUM_Lz14_BcF6-60000.tif:0549-0422	6589.06	11812.4
SUM_Lz14_BcF6-60000.tif:0266-0528	1934.34	2627.11
SUM_Lz14_BcF6-60000.tif:0164-0512	1422.09	2316.03
SUM_Lz14_BcF6-60000.tif:0213-0239	944.299	1845.27
SUM_Lz14_BcF6-70000.tif:0003-0240	2345.07	3469.71
SUM_Lz14_BcF6-70000.tif:0006-0308	4154.73	4744.24
SUM_Lz14_BcF6-70000.tif:0007-0320	2980.65	4053.82
SUM_Lz14_BcF6-70000.tif:0008-0327	3619.97	3829.82
SUM_Lz14_BcF6-70000.tif:0009-0355	3351.53	4577.71
SUM_Lz14_BcF6-70000.tif:0011-0365	3698.63	5831.2
SUM_Lz14_BcF6-70000.tif:0012-0378	2986.6	3981.84
SUM_Lz14_BcF6-70000.tif:0014-0394	3068.24	5797.51
SUM_Lz14_BcF6-70000.tif:0015-0405	3245.75	4323.56
SUM_Lz14_BcF6-70000.tif:0016-0413	2389.25	2826.91
SUM_Lz14_BcF6-70000.tif:0017-0425	3392.55	5984.19
SUM_Lz14_BcF6-70000.tif:0018-0437	2626.66	3747.92
SUM_Lz14_BcF6-70000.tif:0019-0440	3448.18	4949.11
SUM_Lz14_BcF6-70000.tif:0020-0449	2728.31	3705.09
SUM_Lz14_BcF6-70000.tif:0021-0452	4130.3	5890.42
SUM_Lz14_BcF6-70000.tif:0022-0449	2840.39	4686.05
SUM_Lz14_BcF6-70000.tif:0023-0482	3199.48	4633.75
SUM_Lz14_BcF6-70000.tif:0024-0482	3679.37	5951.92
SUM_Lz14_BcF6-70000.tif:0025-0485	3098.59	4285.72
SUM_Lz14_BcF6-70000.tif:0026-0500	4582.7	6296.27
SUM_Lz14_BcF6-70000.tif:0028-0513	2430.81	2786.24
SUM_Lz14_BcF6-70000.tif:0029-0523	4469.93	6880.85
SUM_Lz14_BcF6-70000.tif:0030-0519	3655.39	5138.4
SUM_Lz14_BcF6-70000.tif:0031-0534	3256.68	8710.35
SUM_Lz14_BcF6-70000.tif:0032-0545	3197.17	1915.63
SUM_Lz14_BcF6-70000.tif:0033-0537	4448.28	6540.77
SUM_Lz14_BcF6-70000.tif:0034-0547	5720.36	9739.64
SUM_Lz14_BcF6-70000.tif:0035-0547	2263.18	2946.47
SUM_Lz14_BcF6-70000.tif:0036-0550	2562.99	3890.04
SUM_Lz14_BcF6-70000.tif:0037-0553	2601.77	4386.83
SUM_Lz14_BcF6-70000.tif:0038-0573	2577.52	3697.75
SUM_Lz14_BcF6-70000.tif:0039-0619	3038.55	3698.02
SUM_Lz14_BcF6-70000.tif:0040-0640	4766.13	6682.82
SUM_Lz14_BcF6-70000.tif:0041-0649	4216.34	5454.39
SUM_Lz14_BcF6-70000.tif:0042-0660	2721.94	3944.79
SUM_Lz14_BcF6-70000.tif:0044-0655	2708.17	4906.48
SUM_Lz14_BcF6-70000.tif:0046-0686	3731.15	5426.66
SUM_Lz14_BcF6-70000.tif:0048-0689	3484.55	5928.7
SUM_Lz14_BcF6-70000.tif:0049-0688	2546.44	3764.26
SUM_Lz14_BcF6-70000.tif:0050-0701	2883.17	3695.64
SUM_Lz14_BcF6-70000.tif:0051-0720	2225.45	2617.67
SUM_Lz14_BcF6-70000.tif:0052-0719	2829.45	4230.69
SUM_Lz14_BcF6-70000.tif:0053-0733	4765.23	6979.47
SUM_Lz14_BcF6-70000.tif:0054-0733	3774.01	6926.57
SUM_Lz14_BcF6-70000.tif:0055-0741	3349.56	4305.67
SUM_Lz14_BcF6-70000.tif:0056-0758	3568.97	6527.98
SUM_Lz14_BcF6-70000.tif:0057-0760	3886.26	5742.88
SUM_Lz14_BcF6-70000.tif:0058-0759	3928.11	8111.26
SUM_Lz14_BcF6-70000.tif:0059-0784	2858.34	3607.45
SUM_Lz14_BcF6-70000.tif:0060-0785	3498.99	4581.84
SUM_Lz14_BcF6-70000.tif:0061-0792	3408.79	3838.42
SUM_Lz14_BcF6-70000.tif:0062-0823	2962.4	4587.04
SUM_Lz14_BcF6-70000.tif:0063-0820	3404.86	3558.26
SUM_Lz14_BcF6-70000.tif:0064-0823	2791.21	4619.07
SUM_Lz14_BcF6-70000.tif:0065-0837	2389.02	3436.97
SUM_Lz14_BcF6-70000.tif:0066-0840	4055.89	5832.4
SUM_Lz14_BcF6-70000.tif:0067-0836	3073.51	3359.64
SUM_Lz14_BcF6-70000.tif:0068-0860	2615.37	3782.84
SUM_Lz14_BcF6-70000.tif:0069-0865	2898.75	4450.62
SUM_Lz14_BcF6-70000.tif:0070-0878	3710.61	3728.05
SUM_Lz14_BcF6-70000.tif:0071-0891	3076.36	5013.3
SUM_Lz14_BcF6-70000.tif:0072-0907	2621.75	1450.64
SUM_Lz14_BcF6-70000.tif:0073-0923	3141.05	5064.41
SUM_Lz14_BcF6-70000.tif:0218-0016	1487.17	2514.23
SUM_Lz14_BcF6-70000.tif:0259-0116	775.744	1107.34
SUM_Lz14_BcF6-70000.tif:0506-0225	1014.32	1644.44
SUM_Lz14_BcF6-70000.tif:0368-0274	1198.12	1867.91
SUM_Lz14_BcF6-70000.tif:0678-0306	1651.04	185.809
SUM_Lz14_BcF6-70000.tif:0712-0270	1205.76	1801.25
SUM_Lz14_BcF6-70000.tif:0697-0209	1107.59	1776.59
SUM_Lz14_BcF6-70000.tif:0658-0195	1957.57	3076.17
SUM_Lz14_BcF6-70000.tif:0622-0205	1558.16	2236.11
SUM_Lz14_BcF6-70000.tif:0570-0259	866.386	1400.07
SUM_Lz14_BcF6-70000.tif:0613-0243	1321.57	2259.12
SUM_Lz14_BcF6-70000.tif:0599-0529	1096.68	1862.04
SUM_Lz14_BcF6-70000.tif:0626-0494	685.071	2041.21
SUM_Lz14_BcF6-70000.tif:0501-0551	735.9	1574.39
SUM_Lz14_BcF6-70000.tif:0766-0737	942.348	1842.66
SUM_Lz14_BcF6-70000.tif:0780-0704	1128.77	1821.22
SUM_Lz14_BcF6-70000.tif:0658-0569	1673.92	3117.12
SUM_Lz14_BcF6-70000.tif:0578-0591	3347.67	3477.19
SUM_Lz14_BcF6-70000.tif:0590-0627	3879.15	3628.16
SUM_Lz14_BcF6-70000.tif:0573-0677	1747.85	3077.6
SUM_Lz14_BcF6-70000.tif:0636-0711	1220.62	2296.7
SUM_Lz14_BcF6-70000.tif:0706-0821	846.648	1071.76
SUM_Lz14_BcF6-10000-1.tif:0001-0056	2871.61	2501.1
SUM_Lz14_BcF6-10000-1.tif:0002-0091	3411.98	3724.36
SUM_Lz14_BcF6-10000-1.tif:0003-0112	3893.92	4376.78
SUM_Lz14_BcF6-10000-1.tif:0004-0128	2501.43	3964.68
SUM_Lz14_BcF6-10000-1.tif:0006-0138	6211.7	7598.45
SUM_Lz14_BcF6-10000-1.tif:0007-0156	2436.24	5055.95
SUM_Lz14_BcF6-10000-1.tif:0008-0172	2261.1	3180.16
SUM_Lz14_BcF6-10000-1.tif:0009-0186	2778.47	4883.5
SUM_Lz14_BcF6-10000-1.tif:0010-0199	3688.97	3558.46
SUM_Lz14_BcF6-10000-1.tif:0011-0195	1806.79	3577.91
SUM_Lz14_BcF6-10000-1.tif:0012-0204	1742.48	3774.96
SUM_Lz14_BcF6-10000-1.tif:0013-0202	398	2162.69
SUM_Lz14_BcF6-10000-1.tif:0014-0229	248.479	3192.58
SUM_Lz14_BcF6-10000-1.tif:0015-0221	999.776	2315.16
SUM_Lz14_BcF6-10000-1.tif:0016-0227	1511.32	5671.45
SUM_Lz14_BcF6-10000-1.tif:0018-0230	629.787	2179.75
SUM_Lz14_BcF6-10000-1.tif:0019-0234	1185.03	2644.87
SUM_Lz14_BcF6-10000-1.tif:0020-0247	2349.19	2685.22
SUM_Lz14_BcF6-10000-1.tif:0021-0268	2842.95	2353.08
SUM_Lz14_BcF6-10000-1.tif:0022-0268	1428.36	2262.5
SUM_Lz14_BcF6-10000-1.tif:0023-0285	789.981	3524.75
SUM_Lz14_BcF6-10000-1.tif:0024-0279	1430.02	3600.83
SUM_Lz14_BcF6-10000-1.tif:0025-0288	280.453	2666.93
SUM_Lz14_BcF6-10000-1.tif:0026-0291	1774.55	3240.46
SUM_Lz14_BcF6-10000-1.tif:0028-0328	3115.72	5926.52
SUM_Lz14_BcF6-10000-1.tif:0029-0348	6452.42	1912.96
SUM_Lz14_BcF6-10000-1.tif:0030-0362	2576.74	4805.61
SUM_Lz14_BcF6-10000-1.tif:0031-0362	3379.06	6001.47
SUM_Lz14_BcF6-10000-1.tif:0032-0370	3243.3	6604.14
SUM_Lz14_BcF6-10000-1.tif:0033-0393	4278.62	4311.8
SUM_Lz14_BcF6-10000-1.tif:0034-0417	6370.06	2938.46
SUM_Lz14_BcF6-10000-1.tif:0035-0419	166.361	2758.99
SUM_Lz14_BcF6-10000-1.tif:0036-0431	2666.52	3987.3
SUM_Lz14_BcF6-10000-1.tif:0037-0442	1801.34	2944.41
SUM_Lz14_BcF6-10000-1.tif:0038-0454	648.169	4034.88
SUM_Lz14_BcF6-10000-1.tif:0039-0447	7218.79	3446.67
SUM_Lz14_BcF6-10000-1.tif:0040-0445	1765.21	2899.42
SUM_Lz14_BcF6-10000-1.tif:0042-0494	1247.51	2633.65
SUM_Lz14_BcF6-10000-1.tif:0043-0494	3313.69	5416.3
SUM_Lz14_BcF6-10000-1.tif:0044-0514	1309.9	3370.2
SUM_Lz14_BcF6-10000-1.tif:0045-0514	1708.57	3361.96
SUM_Lz14_BcF6-10000-1.tif:0046-0530	271.037	2559.84
SUM_Lz14_BcF6-10000-1.tif:0047-0549	1493.56	2917.01
SUM_Lz14_BcF6-10000-1.tif:0048-0573	1230.38	3174.36
SUM_Lz14_BcF6-10000-1.tif:0049-0570	2204.79	4454.5
SUM_Lz14_BcF6-10000-1.tif:0050-0581	1895.98	5039.32
SUM_Lz14_BcF6-10000-1.tif:0052-0612	3225.9	7160.48
SUM_Lz14_BcF6-10000-1.tif:0053-0616	2051.47	4801.02
SUM_Lz14_BcF6-10000-1.tif:0054-0638	451.239	2379.66
SUM_Lz14_BcF6-10000-1.tif:0056-0648	804.61	2499.06
SUM_Lz14_BcF6-10000-1.tif:0059-0668	1051.46	4990.32
SUM_Lz14_BcF6-10000-1.tif:0060-0664	5113.06	3380
SUM_Lz14_BcF6-10000-1.tif:0061-0694	1923.99	4180.13
SUM_Lz14_BcF6-10000-1.tif:0062-0740	1619.77	2243.11
SUM_Lz14_BcF6-10000-1.tif:0064-0764	2362.37	4517.35
SUM_Lz14_BcF6-10000-1.tif:0065-0774	646.509	4707.58
SUM_Lz14_BcF6-10000-1.tif:0066-0815	206.438	4324.52
SUM_Lz14_BcF6-10000-1.tif:0067-0829	2496.26	4867.02
SUM_Lz14_BcF6-10000-1.tif:0068-0874	1040.66	3145.82
SUM_Lz14_BcF6-10000-1.tif:0070-0908	3261.6	6259.9
SUM_Lz14_BcF6-10000-1.tif:0072-0916	2561.85	4991.07
SUM_Lz14_BcF6-10000-1.tif:0073-0940	148.417	3369.21
SUM_Lz14_BcF6-10000-1.tif:0074-0934	1181.61	2410.86
SUM_Lz14_BcF6-10000-1.tif:0075-0954	151.919	2283.03
SUM_Lz14_BcF6-10000-1.tif:0076-0955	166.58	4557.82
SUM_Lz14_BcF6-10000-1.tif:0077-0975	361.128	3154.39
SUM_Lz14_BcF6-10000-1.tif:0078-0972	122.88	2085.64
SUM_Lz14_BcF6-10000-1.tif:0658-0171	138.883	1167.12
SUM_Lz14_BcF6-10000-1.tif:0122-0013	132.804	6561.69
SUM_Lz14_BcF6-10000-1.tif:0131-0048	167.628	1256.18
SUM_Lz14_BcF6-10000-1.tif:0083-0454	4061.78	1835.58
SUM_Lz14_BcF6-10000-1.tif:0072-0513	357.161	1127.96
SUM_Lz14_BcF6-10000-1.tif:0113-0538	3354.22	874.47
SUM_Lz14_BcF6-10000-1.tif:0161-0634	197.798	1758.16
SUM_Lz14_BcF6-10000-1.tif:0401-0481	3144.13	4014.71
SUM_Lz14_BcF6-10000-1.tif:0322-0536	977.159	2285.32
SUM_Lz14_BcF6-10000-1.tif:0363-0554	845.511	1834.22
SUM_Lz14_BcF6-10000-1.tif:0424-0544	2039.7	2195.08
SUM_Lz14_BcF6-10000-1.tif:0882-0577	180.218	1752.54
SUM_Lz14_BcF6-10000-1.tif:0920-0560	206.686	2061.51
SUM_Lz14_BcF6-10000-1.tif:0976-0661	139.335	1215.99
SUM_Lz14_BcF6-10000-1.tif:0606-0794	210.306	957.335
SUM_Lz14_BcF6-10000-1.tif:0929-0492	249.93	2074.26
SUM_Lz14_BcF6-10000-1.tif:0888-0515	252.936	1691.67
SUM_Lz14_BcF6-10000-1.tif:0824-0464	364.359	2863.73
SUM_Lz14_BcF6-10000-1.tif:0779-0528	214.374	1268.82
SUM_Lz14_BcF6-10000-1.tif:0735-0472	649.916	2233.91
SUM_Lz14_BcF6-10000-1.tif:0704-0432	3077.66	1646.52
SUM_Lz14_BcF6-10000-1.tif:0536-0422	358.668	1549.46
SUM_Lz14_BcF6-10000-1.tif:0520-0461	506.49	2071.33
SUM_Lz14_BcF6-10000-1.tif:0486-0455	780.458	1629.01
SUM_Lz14_BcF6-10000-1.tif:0601-0136	133.943	1502.25
SUM_Lz14_BcF6-10000-1.tif:0575-0650	229.569	1474.51
SUM_Lz14_BcF6-10000-1.tif:0575-0650	229.569	1474.51
SUM_Lz14_BcF6-10000-1.tif:0609-0615	1579.66	1709.44
SUM_Lz14_BcF6-10000-1.tif:0500-0643	378.902	1717.63
SUM_Lz14_BcF6-10000-1.tif:0564-0568	679.852	1781.67
SUM_Lz14_BcF6-10000-1.tif:0574-0536	864.906	1890.93
SUM_Lz14_BcF6-10000-1.tif:0111-0647	342.177	1263.55
SUM_Lz14_BcF6-10000-1.tif:0325-0358	174.67	1592.31
SUM_Lz14_BcF6-10000-1.tif:0291-0387	216.965	2064.93
SUM_Lz14_BcF6-10000-1.tif:0260-0394	676.298	3141.06
SUM_Lz14_BcF6-10000-1.tif:0241-0441	289.294	1543.54
SUM_Lz14_BcF6-10000-1.tif:0734-0388	1245.22	2943.16
SUM_Lz14_BcF6-10000-1.tif:0747-0411	3325.26	5196.56
SUM_Lz14_BcF6-10000-1.tif:0658-0605	2815.53	5549.41
SUM_Lz14_BcF6-10000-1.tif:0660-0629	2314.91	5324.85
SUM_Lz14_BcF6-10000-1.tif:0654-0498	243.178	2473.81
SUM_Lz14_BcF6-10000-1.tif:0650-0532	335.701	2061.73
SUM_Lz14_BcF6-10000-1.tif:0403-0640	452.246	1900.41
SUM_Lz14_BcF6-10000-1.tif:0365-0649	1067.29	2134.8
SUM_Lz14_BcF6-10000-1.tif:0378-0607	5085.11	1481.78
SUM_Lz14_BcF6-20000-1.tif:0001-0106	1440.01	2178.61
SUM_Lz14_BcF6-20000-1.tif:0002-0139	2469.07	4518.01
SUM_Lz14_BcF6-20000-1.tif:0003-0159	2067.8	4910.45
SUM_Lz14_BcF6-20000-1.tif:0004-0183	2182.59	3643.78
SUM_Lz14_BcF6-20000-1.tif:0005-0190	3030.18	2885.45
SUM_Lz14_BcF6-20000-1.tif:0006-0210	2952.15	4564.25
SUM_Lz14_BcF6-20000-1.tif:0007-0203	202.961	2820.33
SUM_Lz14_BcF6-20000-1.tif:0008-0218	1216.31	3567.28
SUM_Lz14_BcF6-20000-1.tif:0009-0243	736.458	2330.07
SUM_Lz14_BcF6-20000-1.tif:0010-0249	252.901	2431.11
SUM_Lz14_BcF6-20000-1.tif:0011-0261	1498.36	2834.38
SUM_Lz14_BcF6-20000-1.tif:0012-0269	863.192	2182.65
SUM_Lz14_BcF6-20000-1.tif:0013-0323	186.891	2838.55
SUM_Lz14_BcF6-20000-1.tif:0014-0342	2330.85	2247.79
SUM_Lz14_BcF6-20000-1.tif:0015-0366	2130.91	4440.02
SUM_Lz14_BcF6-20000-1.tif:0016-0376	1501.01	3078.31
SUM_Lz14_BcF6-20000-1.tif:0019-0401	1134.93	2999.14
SUM_Lz14_BcF6-20000-1.tif:0020-0405	1313.18	4603.86
SUM_Lz14_BcF6-20000-1.tif:0021-0417	239.531	4024.41
SUM_Lz14_BcF6-20000-1.tif:0022-0421	2824.79	3621.33
SUM_Lz14_BcF6-20000-1.tif:0023-0442	2377.31	5612.43
SUM_Lz14_BcF6-20000-1.tif:0024-0449	1894.35	4224.56
SUM_Lz14_BcF6-20000-1.tif:0025-0471	418.643	3386.04
SUM_Lz14_BcF6-20000-1.tif:0026-0485	370.82	2329.47
SUM_Lz14_BcF6-20000-1.tif:0027-0483	2292.95	2887.31
SUM_Lz14_BcF6-20000-1.tif:0028-0497	1898.59	5992.8
SUM_Lz14_BcF6-20000-1.tif:0029-0508	1329.06	2653.89
SUM_Lz14_BcF6-20000-1.tif:0030-0517	1138.7	2567.26
SUM_Lz14_BcF6-20000-1.tif:0031-0515	1910.44	3627.49
SUM_Lz14_BcF6-20000-1.tif:0032-0531	935.116	2605.58
SUM_Lz14_BcF6-20000-1.tif:0033-0524	911.661	2536.28
SUM_Lz14_BcF6-20000-1.tif:0034-0553	3530.98	4009.69
SUM_Lz14_BcF6-20000-1.tif:0035-0555	1724.11	3560.36
SUM_Lz14_BcF6-20000-1.tif:0036-0562	1251.81	2950.82
SUM_Lz14_BcF6-20000-1.tif:0037-0560	882.57	2685.96
SUM_Lz14_BcF6-20000-1.tif:0038-0570	2023.77	3829.98
SUM_Lz14_BcF6-20000-1.tif:0039-0584	1800.11	2516.97
SUM_Lz14_BcF6-20000-1.tif:0040-0606	1391.37	3419.99
SUM_Lz14_BcF6-20000-1.tif:0041-0616	2207.01	4854.89
SUM_Lz14_BcF6-20000-1.tif:0042-0637	1273.86	3199.84
SUM_Lz14_BcF6-20000-1.tif:0043-0638	1045.43	4379.56
SUM_Lz14_BcF6-20000-1.tif:0044-0665	1303.91	2818.9
SUM_Lz14_BcF6-20000-1.tif:0045-0679	1915.86	5415.52
SUM_Lz14_BcF6-20000-1.tif:0046-0705	2141.17	5532.61
SUM_Lz14_BcF6-20000-1.tif:0048-0717	1061.34	3905.23
SUM_Lz14_BcF6-20000-1.tif:0049-0751	225.248	3219.43
SUM_Lz14_BcF6-20000-1.tif:0050-0783	546.861	2217.95
SUM_Lz14_BcF6-20000-1.tif:0051-0819	2356.95	4966.11
SUM_Lz14_BcF6-20000-1.tif:0052-0829	226.104	3226.55
SUM_Lz14_BcF6-20000-1.tif:0053-0849	1653.74	3637.11
SUM_Lz14_BcF6-20000-1.tif:0054-0845	910.366	2743.45
SUM_Lz14_BcF6-20000-1.tif:0055-0846	222.262	2556.57
SUM_Lz14_BcF6-20000-1.tif:0056-0849	1060.48	2559.28
SUM_Lz14_BcF6-20000-1.tif:0057-0902	339.557	2773.3
SUM_Lz14_BcF6-20000-1.tif:0058-0916	3626.33	8968.18
SUM_Lz14_BcF6-20000-1.tif:0059-0943	1175.47	4634.23
SUM_Lz14_BcF6-20000-1.tif:0060-0961	1103.47	2717.35
SUM_Lz14_BcF6-20000-1.tif:0061-0984	2973.88	5562.43
SUM_Lz14_BcF6-20000-1.tif:0062-0996	124.315	2085.68
SUM_Lz14_BcF6-20000-1.tif:0063-1002	1984.24	4278.56
SUM_Lz14_BcF6-20000-1.tif:0629-0501	1328.01	2444.02
SUM_Lz14_BcF6-20000-1.tif:0555-0543	1799.26	2817.38
SUM_Lz14_BcF6-20000-1.tif:0421-0581	327.561	3129.97
SUM_Lz14_BcF6-20000-1.tif:0471-0483	534.467	1392.1
SUM_Lz14_BcF6-20000-1.tif:0143-0429	1463.1	2351.73
SUM_Lz14_BcF6-20000-1.tif:0153-0383	1126.98	1855.28
SUM_Lz14_BcF6-20000-1.tif:0378-0305	230.352	1232.94
SUM_Lz14_BcF6-20000-1.tif:0342-0336	1287.03	2411.21
SUM_Lz14_BcF6-20000-1.tif:0304-0321	206.756	1407.05
SUM_Lz14_BcF6-20000-1.tif:0333-0891	165.191	958.803
SUM_Lz14_BcF6-20000-1.tif:0563-0726	110.886	1282.25
SUM_Lz14_BcF6-20000-1.tif:0889-0662	245.898	1452.9
SUM_Lz14_BcF6-20000-1.tif:0926-0486	276.202	1459.45
SUM_Lz14_BcF6-20000-1.tif:0750-0379	648.881	2601.49
SUM_Lz14_BcF6-20000-1.tif:0734-0429	2324.97	1434.56
SUM_Lz14_BcF6-20000-1.tif:0685-0419	2646.96	2188.57
SUM_Lz14_BcF6-20000-1.tif:0604-0425	1293.32	2646.89
SUM_Lz14_BcF6-20000-1.tif:0587-0380	376.273	2185.45
SUM_Lz14_BcF6-20000-1.tif:0534-0424	265.676	1595.21
SUM_Lz14_BcF6-30000-1.tif:0001-0063	934.089	3254.7
SUM_Lz14_BcF6-30000-1.tif:0002-0123	5122.32	3468.73
SUM_Lz14_BcF6-30000-1.tif:0003-0134	2005.94	5200.81
SUM_Lz14_BcF6-30000-1.tif:0004-0184	925.061	2310.82
SUM_Lz14_BcF6-30000-1.tif:0005-0196	757.339	2897.39
SUM_Lz14_BcF6-30000-1.tif:0006-0199	239.95	2414.51
SUM_Lz14_BcF6-30000-1.tif:0007-0251	836.392	4189.4
SUM_Lz14_BcF6-30000-1.tif:0008-0251	4166.53	4063.48
SUM_Lz14_BcF6-30000-1.tif:0009-0310	2383.09	4973.53
SUM_Lz14_BcF6-30000-1.tif:0011-0357	1915.73	2142.86
SUM_Lz14_BcF6-30000-1.tif:0012-0364	1044.39	1964.78
SUM_Lz14_BcF6-30000-1.tif:0013-0420	1497.46	3446.61
SUM_Lz14_BcF6-30000-1.tif:0014-0404	1107.02	3368.45
SUM_Lz14_BcF6-30000-1.tif:0015-0412	1807.96	3538.28
SUM_Lz14_BcF6-30000-1.tif:0016-0429	1389.53	3193.27
SUM_Lz14_BcF6-30000-1.tif:0017-0438	2584.91	3795.11
SUM_Lz14_BcF6-30000-1.tif:0018-0433	1992.98	4485.53
SUM_Lz14_BcF6-30000-1.tif:0019-0470	179.922	3141.86
SUM_Lz14_BcF6-30000-1.tif:0020-0508	1450.69	3017.19
SUM_Lz14_BcF6-30000-1.tif:0021-0499	165.251	2207.64
SUM_Lz14_BcF6-30000-1.tif:0022-0550	1113.26	4037.94
SUM_Lz14_BcF6-30000-1.tif:0023-0611	782.946	2130.23
SUM_Lz14_BcF6-30000-1.tif:0024-0610	2117.67	2790.52
SUM_Lz14_BcF6-30000-1.tif:0025-0613	1033.62	2971.02
SUM_Lz14_BcF6-30000-1.tif:0027-0634	3256.27	3274.28
SUM_Lz14_BcF6-30000-1.tif:0028-0645	401.838	3015.21
SUM_Lz14_BcF6-30000-1.tif:0029-0740	209.28	2859.72
SUM_Lz14_BcF6-30000-1.tif:0030-0975	1076.34	3120.97
SUM_Lz14_BcF6-30000-1.tif:0316-0717	120.601	1530.5
SUM_Lz14_BcF6-30000-1.tif:0335-0758	135.786	2066.66
SUM_Lz14_BcF6-30000-1.tif:0328-0875	504.305	1134.38
SUM_Lz14_BcF6-30000-1.tif:0688-0499	409.986	1869.74
SUM_Lz14_BcF6-30000-1.tif:0636-0400	485.141	2674.84
SUM_Lz14_BcF6-30000-1.tif:0640-0373	251.339	1741.99
SUM_Lz14_BcF6-30000-1.tif:0493-0148	144.191	1598.17
SUM_Lz14_BcF6-30000-1.tif:0450-0173	126.248	1316.32
SUM_Lz14_BcF6-30000-1.tif:0068-0317	208.252	976.916
SUM_Lz14_BcF6-30000-1.tif:0075-0368	3788.77	1106.86
SUM_Lz14_BcF6-30000-1.tif:0120-0435	845.41	1092.96
SUM_Lz14_BcF6-30000-1.tif:0231-0390	2161.07	4163.09
SUM_Lz14_BcF6-30000-1.tif:0188-0355	168.967	1810.81
SUM_Lz14_BcF6-30000-1.tif:0297-0553	1785.54	2632.34
SUM_Lz14_BcF6-30000-1.tif:0399-0557	1965.33	3145.72
SUM_Lz14_BcF6-30000-1.tif:0341-0643	133.851	862.115
SUM_Lz14_BcF6-30000-1.tif:0612-0554	684.337	2203.86
SUM_Lz14_BcF6-30000-1.tif:0609-0603	3353.76	2673.31
SUM_Lz14_BcF6-30000-1.tif:0667-0438	411.009	896.436
SUM_Lz14_BcF6-30000-1.tif:0574-0427	323.407	1016.85
SUM_Lz14_BcF6-30000-1.tif:0529-0429	241.66	910.092
SUM_Lz14_BcF6-30000-1.tif:0548-0381	314.109	842.782
SUM_Lz14_BcF6-30000-1.tif:0800-0308	153.342	868.039
SUM_Lz14_BcF6-30000-1.tif:0343-0388	1088.25	3568.26
SUM_Lz14_BcF6-30000-1.tif:0256-0125	118.123	952.05
SUM_Lz14_BcF6-30000-1.tif:0521-0576	286.878	978.437
SUM_Lz14_BcF6-40000-1.tif:0001-0151	810.331	2764.57
SUM_Lz14_BcF6-40000-1.tif:0002-0157	1189.73	3526.4
SUM_Lz14_BcF6-40000-1.tif:0003-0167	2017.95	4455.9
SUM_Lz14_BcF6-40000-1.tif:0004-0191	2266.98	3075.14
SUM_Lz14_BcF6-40000-1.tif:0005-0214	900.437	2188.77
SUM_Lz14_BcF6-40000-1.tif:0006-0220	2891.38	2251.22
SUM_Lz14_BcF6-40000-1.tif:0007-0249	2412.77	4077.8
SUM_Lz14_BcF6-40000-1.tif:0008-0281	1462.48	3543.97
SUM_Lz14_BcF6-40000-1.tif:0009-0362	2724.2	5951.06
SUM_Lz14_BcF6-40000-1.tif:0010-0367	1140.56	3257.22
SUM_Lz14_BcF6-40000-1.tif:0011-0398	3975.97	5293.64
SUM_Lz14_BcF6-40000-1.tif:0012-0405	184.454	2887.32
SUM_Lz14_BcF6-40000-1.tif:0013-0441	986.79	2468.96
SUM_Lz14_BcF6-40000-1.tif:0014-0446	2983.63	4426.95
SUM_Lz14_BcF6-40000-1.tif:0015-0455	1002.13	2356.61
SUM_Lz14_BcF6-40000-1.tif:0016-0462	1329.86	3242.86
SUM_Lz14_BcF6-40000-1.tif:0017-0472	1569.09	2188.74
SUM_Lz14_BcF6-40000-1.tif:0018-0500	1275.09	2082.58
SUM_Lz14_BcF6-40000-1.tif:0020-0539	1342.6	1978.67
SUM_Lz14_BcF6-40000-1.tif:0021-0548	1616.07	2794.78
SUM_Lz14_BcF6-40000-1.tif:0022-0572	3014.13	3712.21
SUM_Lz14_BcF6-40000-1.tif:0023-0598	466.748	2616.05
SUM_Lz14_BcF6-40000-1.tif:0024-0620	2045.26	4250.52
SUM_Lz14_BcF6-40000-1.tif:0025-0617	461.047	2774.7
SUM_Lz14_BcF6-40000-1.tif:0026-0636	1715.99	3638.12
SUM_Lz14_BcF6-40000-1.tif:0027-0634	871.521	2375.26
SUM_Lz14_BcF6-40000-1.tif:0028-0656	1567.52	3455.03
SUM_Lz14_BcF6-40000-1.tif:0029-0671	1690.31	3300.49
SUM_Lz14_BcF6-40000-1.tif:0030-0672	4039.76	7608.87
SUM_Lz14_BcF6-40000-1.tif:0031-0670	1198.06	4073.08
SUM_Lz14_BcF6-40000-1.tif:0032-0680	153.039	2852.42
SUM_Lz14_BcF6-40000-1.tif:0033-0707	1105.96	3706.38
SUM_Lz14_BcF6-40000-1.tif:0034-0713	723.254	3563.44
SUM_Lz14_BcF6-40000-1.tif:0035-0729	200.737	3343.9
SUM_Lz14_BcF6-40000-1.tif:0036-0740	1305.41	3800.25
SUM_Lz14_BcF6-40000-1.tif:0037-0743	2353.64	5005.68
SUM_Lz14_BcF6-40000-1.tif:0038-0754	182.526	1785.07
SUM_Lz14_BcF6-40000-1.tif:0039-0770	2817.42	3606.65
SUM_Lz14_BcF6-40000-1.tif:0040-0795	1244.19	3649.05
SUM_Lz14_BcF6-40000-1.tif:0041-0800	2367.06	5108.85
SUM_Lz14_BcF6-40000-1.tif:0042-0797	254.101	2942.65
SUM_Lz14_BcF6-40000-1.tif:0044-0827	1579.11	4531.54
SUM_Lz14_BcF6-40000-1.tif:0045-0863	2781.15	6431.76
SUM_Lz14_BcF6-40000-1.tif:0046-0880	1813.36	4579.27
SUM_Lz14_BcF6-40000-1.tif:0611-0965	111.784	1583.66
SUM_Lz14_BcF6-40000-1.tif:0468-0812	99.669	1338.52
SUM_Lz14_BcF6-40000-1.tif:0319-0802	105.453	1818.54
SUM_Lz14_BcF6-40000-1.tif:0376-0956	96.783	978.633
SUM_Lz14_BcF6-40000-1.tif:0521-0705	98.927	2082.79
SUM_Lz14_BcF6-40000-1.tif:0555-0747	87.198	1734.81
SUM_Lz14_BcF6-40000-1.tif:0796-0393	967.792	1361.87
SUM_Lz14_BcF6-40000-1.tif:0844-0379	166.526	1219.3
SUM_Lz14_BcF6-40000-1.tif:0840-0421	830.123	1217.67
SUM_Lz14_BcF6-40000-1.tif:0714-0364	519.36	1108.01
SUM_Lz14_BcF6-40000-1.tif:0591-0336	162.559	2162.24
SUM_Lz14_BcF6-40000-1.tif:0555-0354	644.924	1243.76
SUM_Lz14_BcF6-40000-1.tif:0464-0356	1351.02	4889.12
SUM_Lz14_BcF6-40000-1.tif:0432-0382	233.24	2468.91
SUM_Lz14_BcF6-40000-1.tif:0319-0360	470.71	1675.16
SUM_Lz14_BcF6-40000-1.tif:0363-0332	196.127	2406.47
SUM_Lz14_BcF6-40000-1.tif:0238-0330	1036.33	2773.2
SUM_Lz14_BcF6-40000-1.tif:0200-0321	136.478	1321.52
SUM_Lz14_BcF6-40000-1.tif:0323-0561	1814.15	1274.01
SUM_Lz14_BcF6-40000-1.tif:0533-0536	2152.01	2660.11
SUM_Lz14_BcF6-40000-1.tif:0602-0535	540.001	2316.32
SUM_Lz14_BcF6-40000-1.tif:0725-0581	2836.9	4831.08
SUM_Lz14_BcF6-40000-1.tif:0801-0561	183.523	2030.78
SUM_Lz14_BcF6-40000-1.tif:0960-0670	126.975	1291.82
SUM_Lz14_BcF6-40000-1.tif:0075-0205	107.083	596.071
SUM_Lz14_BcF6-50000-1.tif:0002-0141	1721.82	4330.34
SUM_Lz14_BcF6-50000-1.tif:0003-0161	1944.91	3564.88
SUM_Lz14_BcF6-50000-1.tif:0004-0223	1415.79	4894.72
SUM_Lz14_BcF6-50000-1.tif:0006-0294	7138.9	3947.82
SUM_Lz14_BcF6-50000-1.tif:0007-0312	3250.09	6483.2
SUM_Lz14_BcF6-50000-1.tif:0008-0318	5802.65	5268.3
SUM_Lz14_BcF6-50000-1.tif:0009-0342	1838.96	4946.84
SUM_Lz14_BcF6-50000-1.tif:0010-0342	1666.18	2150.11
SUM_Lz14_BcF6-50000-1.tif:0011-0356	4441.77	3408.31
SUM_Lz14_BcF6-50000-1.tif:0012-0369	1748.87	4718.92
SUM_Lz14_BcF6-50000-1.tif:0013-0387	2566.43	4577.79
SUM_Lz14_BcF6-50000-1.tif:0014-0399	2419.32	5598.77
SUM_Lz14_BcF6-50000-1.tif:0015-0396	3190.76	4868.16
SUM_Lz14_BcF6-50000-1.tif:0016-0395	1253.39	4590.19
SUM_Lz14_BcF6-50000-1.tif:0017-0407	2242.47	5096.18
SUM_Lz14_BcF6-50000-1.tif:0018-0419	829.589	2470.16
SUM_Lz14_BcF6-50000-1.tif:0019-0425	2208.26	4114.38
SUM_Lz14_BcF6-50000-1.tif:0020-0445	3119.82	6843.97
SUM_Lz14_BcF6-50000-1.tif:0021-0461	5659.91	5378.31
SUM_Lz14_BcF6-50000-1.tif:0022-0468	2379.28	5112.24
SUM_Lz14_BcF6-50000-1.tif:0023-0526	2549.99	4912.91
SUM_Lz14_BcF6-50000-1.tif:0025-0579	1562.41	2915.68
SUM_Lz14_BcF6-50000-1.tif:0026-0586	4022.24	2216.32
SUM_Lz14_BcF6-50000-1.tif:0028-0648	2003.78	4735.43
SUM_Lz14_BcF6-50000-1.tif:0029-0639	1789.09	3078.45
SUM_Lz14_BcF6-50000-1.tif:0030-0645	1622	2781.45
SUM_Lz14_BcF6-50000-1.tif:0032-0666	3339.37	8370.16
SUM_Lz14_BcF6-50000-1.tif:0034-0692	3541.07	5350.93
SUM_Lz14_BcF6-50000-1.tif:0035-0694	923.252	2854.22
SUM_Lz14_BcF6-50000-1.tif:0036-0714	223.249	2651.88
SUM_Lz14_BcF6-50000-1.tif:0037-0726	1838.27	5148.2
SUM_Lz14_BcF6-50000-1.tif:0038-0728	1411.93	4387.72
SUM_Lz14_BcF6-50000-1.tif:0039-0740	2087.38	4106.4
SUM_Lz14_BcF6-50000-1.tif:0041-0752	902.582	1916.43
SUM_Lz14_BcF6-50000-1.tif:0042-0767	2679.99	4478.61
SUM_Lz14_BcF6-50000-1.tif:0044-0820	2506.04	4884.6
SUM_Lz14_BcF6-50000-1.tif:0045-0836	1185.05	2965.11
SUM_Lz14_BcF6-50000-1.tif:0046-0859	716.387	2675.91
SUM_Lz14_BcF6-50000-1.tif:0047-0932	254.665	5326.3
SUM_Lz14_BcF6-50000-1.tif:0048-0959	2151.7	5354.87
SUM_Lz14_BcF6-50000-1.tif:0049-0972	1482.44	3230.48
SUM_Lz14_BcF6-50000-1.tif:0050-0989	1352.51	3893.74
SUM_Lz14_BcF6-50000-1.tif:0051-1003	2451.03	4868.37
SUM_Lz14_BcF6-50000-1.tif:0052-1005	490.3	2322.51
SUM_Lz14_BcF6-50000-1.tif:0053-1010	1227.61	2090.45
SUM_Lz14_BcF6-50000-1.tif:0583-0537	3895.07	2994.24
SUM_Lz14_BcF6-50000-1.tif:0187-0508	185.513	1299.04
SUM_Lz14_BcF6-50000-1.tif:0101-0568	905.493	972.603
SUM_Lz14_BcF6-50000-1.tif:0251-0545	1094.29	1084.46
SUM_Lz14_BcF6-50000-1.tif:0183-0778	162.056	644.443
SUM_Lz14_BcF6-50000-1.tif:0390-0632	1899.03	1350.36
SUM_Lz14_BcF6-50000-1.tif:0283-0612	2310.67	3771.63
SUM_Lz14_BcF6-50000-1.tif:0313-0585	492.113	1563.37
SUM_Lz14_BcF6-50000-1.tif:0251-0611	930.555	1712.8
SUM_Lz14_BcF6-50000-1.tif:0083-0781	156.599	930.767
SUM_Lz14_BcF6-50000-1.tif:0698-0500	3228.11	7089.72
SUM_Lz14_BcF6-50000-1.tif:0694-0477	481.537	3143.46
SUM_Lz14_BcF6-50000-1.tif:0805-0695	294.366	1106.99
SUM_Lz14_BcF6-50000-1.tif:0697-0747	179.729	1611.29
SUM_Lz14_BcF6-50000-1.tif:0675-0899	356.958	1378.45
SUM_Lz14_BcF6-50000-1.tif:0553-0701	1401.32	3340.07
SUM_Lz14_BcF6-50000-1.tif:0507-0687	423.998	2268.53
SUM_Lz14_BcF6-50000-1.tif:0505-0718	235.576	1258.03
SUM_Lz14_BcF6-50000-1.tif:0390-0752	1531.34	3405.82
SUM_Lz14_BcF6-50000-1.tif:0383-0777	189.909	1160.94
SUM_Lz14_BcF6-50000-1.tif:0738-0524	216.153	1801.17
SUM_Lz14_BcF6-50000-1.tif:0768-0530	1955.26	7007.81
SUM_Lz14_BcF6-50000-1.tif:0767-0505	1431.58	2171.55
SUM_Lz14_BcF6-50000-1.tif:0774-0617	394.26	1649.73
SUM_Lz14_BcF6-50000-1.tif:0762-0656	364.869	2205.05
SUM_Lz14_BcF6-60000-1.tif:0001-0145	163.338	1795.72
SUM_Lz14_BcF6-60000-1.tif:0002-0168	1915.58	3532.81
SUM_Lz14_BcF6-60000-1.tif:0003-0166	1744.45	3707.8
SUM_Lz14_BcF6-60000-1.tif:0004-0168	172.023	2699.39
SUM_Lz14_BcF6-60000-1.tif:0005-0173	1804.33	3262.1
SUM_Lz14_BcF6-60000-1.tif:0006-0207	959.276	1988.4
SUM_Lz14_BcF6-60000-1.tif:0007-0223	2072.1	5062.83
SUM_Lz14_BcF6-60000-1.tif:0008-0231	1331.74	3275.55
SUM_Lz14_BcF6-60000-1.tif:0009-0258	1334.98	1943.33
SUM_Lz14_BcF6-60000-1.tif:0012-0380	1151.88	3953.31
SUM_Lz14_BcF6-60000-1.tif:0013-0469	954.101	2294.86
SUM_Lz14_BcF6-60000-1.tif:0014-0502	1607.62	3693.74
SUM_Lz14_BcF6-60000-1.tif:0015-0497	800.404	2850.06
SUM_Lz14_BcF6-60000-1.tif:0016-0528	1281.45	2037
SUM_Lz14_BcF6-60000-1.tif:0017-0597	324.048	2561.66
SUM_Lz14_BcF6-60000-1.tif:0018-0630	162.058	3441.04
SUM_Lz14_BcF6-60000-1.tif:0019-0708	3853.17	4772.86
SUM_Lz14_BcF6-60000-1.tif:0020-0704	1200.83	2468.04
SUM_Lz14_BcF6-60000-1.tif:0021-0783	1454.22	3683.31
SUM_Lz14_BcF6-60000-1.tif:0022-0798	3080.67	7640.46
SUM_Lz14_BcF6-60000-1.tif:0023-0860	173.101	2922.26
SUM_Lz14_BcF6-60000-1.tif:0024-0914	1758.93	4268.45
SUM_Lz14_BcF6-60000-1.tif:0025-0930	1053.46	5572.67
SUM_Lz14_BcF6-60000-1.tif:0026-1005	1449.09	2817.39
SUM_Lz14_BcF6-60000-1.tif:0297-0532	1755.05	4195.87
SUM_Lz14_BcF6-60000-1.tif:0330-0510	2707.91	6717.24
SUM_Lz14_BcF6-60000-1.tif:0087-0528	146.172	1379.74
SUM_Lz14_BcF6-60000-1.tif:0148-0510	609.064	1239.39
SUM_Lz14_BcF6-60000-1.tif:0369-0376	892.036	2196.11
SUM_Lz14_BcF6-60000-1.tif:0350-0396	1467.05	3513.56
SUM_Lz14_BcF6-60000-1.tif:0336-0424	170.462	2270.88
SUM_Lz14_BcF6-60000-1.tif:0393-0453	243.089	2279.34
SUM_Lz14_BcF6-60000-1.tif:0419-0472	1489.93	2882.31
SUM_Lz14_BcF6-60000-1.tif:0450-0488	913.577	2232.62
SUM_Lz14_BcF6-60000-1.tif:0450-0488	913.577	2232.62
SUM_Lz14_BcF6-60000-1.tif:0492-0407	1745.94	2950.31
SUM_Lz14_BcF6-60000-1.tif:0579-0366	1244.72	2228.06
SUM_Lz14_BcF6-60000-1.tif:0705-0325	123.565	956.667
SUM_Lz14_BcF6-60000-1.tif:0681-0413	2904.82	6853.05
SUM_Lz14_BcF6-60000-1.tif:0719-0429	1348.45	2916.73
SUM_Lz14_BcF6-60000-1.tif:0692-0499	238.088	1394.53
SUM_Lz14_BcF6-60000-1.tif:0637-0413	201.32	1914.86
SUM_Lz14_BcF6-60000-1.tif:0656-0451	189.096	1512.69
SUM_Lz14_BcF6-60000-1.tif:0571-0430	288.435	2470.75
SUM_Lz14_BcF6-60000-1.tif:0471-0374	1318.28	3052.6
SUM_Lz14_BcF6-60000-1.tif:0264-0382	496.914	2251.02
SUM_Lz14_BcF6-60000-1.tif:0220-0388	175.797	2519.28
SUM_Lz14_BcF6-60000-1.tif:0199-0427	236.475	1797.08
SUM_Lz14_BcF6-60000-1.tif:0162-0418	288.019	2190.36
SUM_Lz14_BcF6-60000-1.tif:0129-0419	573.845	2800.77
SUM_Lz14_BcF6-60000-1.tif:0099-0435	2052.37	4421.29
SUM_Lz14_BcF6-60000-1.tif:0111-0386	681.891	1840.01
SUM_Lz14_BcF6-60000-1.tif:0589-0863	548.815	1520.58
SUM_Lz14_BcF6-60000-1.tif:0618-0564	1748.68	3255.91
SUM_Lz14_BcF6-60000-1.tif:0623-0623	1456.22	3432.23
SUM_Lz14_BcF6-60000-1.tif:0646-0593	4959.62	4454.47
SUM_Lz14_BcF6-60000-1.tif:0599-0648	1049.67	2711.94
SUM_Lz14_BcF6-60000-1.tif:0553-0653	2082.41	5169.67
SUM_Lz14_BcF6-60000-1.tif:0471-0538	720.363	2532.21
SUM_Lz14_BcF6-60000-1.tif:0452-0564	1674.08	3732.61
SUM_Lz14_BcF6-60000-1.tif:0436-0596	1645.8	3230.72
SUM_Lz14_BcF6-60000-1.tif:0903-0474	1104.29	3256.76
SUM_Lz14_BcF6-60000-1.tif:0924-0488	180.122	1894.56
SUM_Lz14_BcF6-60000-1.tif:0360-0565	2362.61	5480.33
SUM_Lz14_BcF6-60000-1.tif:0385-0597	375.982	2209.86
C1-SUM_lzGFP_BcF6_20X-5.tif:0003-0232	2831.46	8805.93
C1-SUM_lzGFP_BcF6_20X-5.tif:0004-0245	4193.05	11826.3
C1-SUM_lzGFP_BcF6_20X-5.tif:0005-0285	2912.19	8903.82
C1-SUM_lzGFP_BcF6_20X-5.tif:0006-0286	3039.88	10045.4
C1-SUM_lzGFP_BcF6_20X-5.tif:0007-0293	2999.79	11987.7
C1-SUM_lzGFP_BcF6_20X-5.tif:0009-0334	3855.98	14155.3
C1-SUM_lzGFP_BcF6_20X-5.tif:0010-0338	3397.27	10311
C1-SUM_lzGFP_BcF6_20X-5.tif:0011-0365	2489.61	7934.51
C1-SUM_lzGFP_BcF6_20X-5.tif:0012-0379	3815.66	12602.5
C1-SUM_lzGFP_BcF6_20X-5.tif:0014-0421	2462.05	1254.69
C1-SUM_lzGFP_BcF6_20X-5.tif:0015-0410	3117.84	15206.6
C1-SUM_lzGFP_BcF6_20X-5.tif:0016-0422	4564.36	12116.1
C1-SUM_lzGFP_BcF6_20X-5.tif:0018-0457	3105.21	10159.4
C1-SUM_lzGFP_BcF6_20X-5.tif:0019-0499	3680.07	16662.8
C1-SUM_lzGFP_BcF6_20X-5.tif:0020-0486	2679.24	8082.53
C1-SUM_lzGFP_BcF6_20X-5.tif:0021-0553	4892.19	14788.2
C1-SUM_lzGFP_BcF6_20X-5.tif:0022-0543	2621.41	8469.05
C1-SUM_lzGFP_BcF6_20X-5.tif:0023-0559	2987.27	10251.1
C1-SUM_lzGFP_BcF6_20X-5.tif:0025-0586	3614.66	10828.5
C1-SUM_lzGFP_BcF6_20X-5.tif:0026-0610	3774.31	11178.1
C1-SUM_lzGFP_BcF6_20X-5.tif:0027-0620	3084.94	8758.79
C1-SUM_lzGFP_BcF6_20X-5.tif:0028-0673	3607.95	11880.7
C1-SUM_lzGFP_BcF6_20X-5.tif:0029-0739	3013.28	9411.06
C1-SUM_lzGFP_BcF6_20X-5.tif:0030-0736	3265.68	13184.5
C1-SUM_lzGFP_BcF6_20X-5.tif:0031-0814	3033.32	9400.81
C1-SUM_lzGFP_BcF6_20X-5.tif:0032-0835	2836.88	9452.23
C1-SUM_lzGFP_BcF6_20X-5.tif:0258-0417	1099.53	3557.36
C1-SUM_lzGFP_BcF6_20X-5.tif:0250-0448	870.888	3236.23
C1-SUM_lzGFP_BcF6_20X-5.tif:0329-0449	2725.28	12282.6
C1-SUM_lzGFP_BcF6_20X-5.tif:0477-0472	2468.29	7253.66
C1-SUM_lzGFP_BcF6_20X-5.tif:0468-0511	2347.16	8619.2
C1-SUM_lzGFP_BcF6_20X-5.tif:0543-0493	2282.28	7385.64
C1-SUM_lzGFP_BcF6_20X-5.tif:0516-0522	4052.2	13988
C1-SUM_lzGFP_BcF6_20X-5.tif:0624-0529	3076.31	12597.1
C1-SUM_lzGFP_BcF6_20X-5.tif:0505-0678	717.061	4952.8
C1-SUM_lzGFP_BcF6_20X-5.tif:0437-0843	644.629	2525.47
C1-SUM_lzGFP_BcF6_20X-5.tif:0822-0524	870.292	3566.86
C1-SUM_lzGFP_BcF6_20X-5.tif:0693-0473	2874.26	7234.27
C1-SUM_lzGFP_BcF6_20X-5.tif:0614-0449	1076.89	4935.74
C1-SUM_lzGFP_BcF6_20X-5.tif:0442-0341	1803.3	7122.82
C1-SUM_lzGFP_BcF6_20X-5.tif:0394-0411	2737.16	11615.1
C1-SUM_lzGFP_BcF6_20X-5.tif:0398-0457	3018.01	11922.2
C1-SUM_lzGFP_BcF6_20X-5.tif:0361-0464	3751.76	11858.3
C1-SUM_lzGFP_BcF6_20X-5.tif:0362-0431	3691.72	16963.9
C1-SUM_lzGFP_BcF6_20X-5.tif:0254-0512	1039.9	5686.66
C1-SUM_lzGFP_BcF6_20X-5.tif:0225-0537	1995.9	6069.51
C1-SUM_lzGFP_BcF6_20X-5.tif:0651-0225	641.621	2197.51
C1-SUM_lzGFP_BcF6_20X-5.tif:0595-0335	883.805	3253.71
C1-SUM_lzGFP_BcF6_20X-5.tif:0612-0375	490.121	1917.78
C1-SUM_lzGFP_BcF6_20X-5.tif:0428-0415	5729.11	17711.4
C1-SUM_lzGFP_BcF6_20X-5.tif:0660-0653	690.407	3277.97
C1-SUM_lzGFP_BcF6_20X-5.tif:0808-0774	607.329	2329.14
C1-SUM_lzGFP_BcF6_20X-5.tif:0809-0945	711.566	2538.21
C1-SUM_lzGFP_BcF6_20X-5.tif:0768-0485	881.706	3736.32
C1-SUM_lzGFP_BcF6_20X-5.tif:0379-0183	310.349	1054.17
C1-SUM_lzGFP_BcF6_20X-5.tif:0891-0279	326.214	1258.96
C1-SUM_lzGFP_BcF6_20X-5.tif:0675-0586	1851.37	4539.57
C1-SUM_lzGFP_BcF6_20X-5.tif:0732-0607	764.677	3007.32
C1-SUM_lzGFP_BcF6_20X-5.tif:0580-0505	2107.18	8908.91
C1-SUM_lzGFP_BcF6_20X-5.tif:0526-0948	370.94	2301.44
C1-SUM_lzGFP_BcF6_20X-6.tif:0005-0355	2429.68	2986.67
C1-SUM_lzGFP_BcF6_20X-6.tif:0006-0373	2647.91	3389.31
C1-SUM_lzGFP_BcF6_20X-6.tif:0008-0438	2714.28	3924.32
C1-SUM_lzGFP_BcF6_20X-6.tif:0009-0472	3154.48	5747.79
C1-SUM_lzGFP_BcF6_20X-6.tif:0010-0506	3104.59	6145.91
C1-SUM_lzGFP_BcF6_20X-6.tif:0011-0523	3952.05	6599.74
C1-SUM_lzGFP_BcF6_20X-6.tif:0012-0519	2214.91	3485.37
C1-SUM_lzGFP_BcF6_20X-6.tif:0013-0537	2670.89	2613.93
C1-SUM_lzGFP_BcF6_20X-6.tif:0015-0538	2676.35	4441.39
C1-SUM_lzGFP_BcF6_20X-6.tif:0016-0550	2759.58	3861.44
C1-SUM_lzGFP_BcF6_20X-6.tif:0017-0583	3358.07	6041.27
C1-SUM_lzGFP_BcF6_20X-6.tif:0018-0604	4808.71	7060.63
C1-SUM_lzGFP_BcF6_20X-6.tif:0020-0616	2650.18	4428.59
C1-SUM_lzGFP_BcF6_20X-6.tif:0022-0638	3815.52	5660.91
C1-SUM_lzGFP_BcF6_20X-6.tif:0023-0645	3065.52	5854.36
C1-SUM_lzGFP_BcF6_20X-6.tif:0024-0662	5285.39	8746.47
C1-SUM_lzGFP_BcF6_20X-6.tif:0025-0680	3529.56	3959.4
C1-SUM_lzGFP_BcF6_20X-6.tif:0026-0681	3252.68	5814.59
C1-SUM_lzGFP_BcF6_20X-6.tif:0028-0724	2240.12	3091.45
C1-SUM_lzGFP_BcF6_20X-6.tif:0030-0811	2311.95	4305.74
C1-SUM_lzGFP_BcF6_20X-6.tif:0031-0820	3701.42	5700.61
C1-SUM_lzGFP_BcF6_20X-6.tif:0032-0937	2162.66	3909.56
C1-SUM_lzGFP_BcF6_20X-6.tif:0492-0133	598.614	1185.46
C1-SUM_lzGFP_BcF6_20X-6.tif:0631-0139	560.552	1310.46
C1-SUM_lzGFP_BcF6_20X-6.tif:0574-0315	710.187	1429.94
C1-SUM_lzGFP_BcF6_20X-6.tif:0546-0367	1124.79	1974.35
C1-SUM_lzGFP_BcF6_20X-6.tif:0467-0361	957.299	1645.88
C1-SUM_lzGFP_BcF6_20X-6.tif:0495-0864	633.035	1252.57
C1-SUM_lzGFP_BcF6_20X-6.tif:0721-0629	3278.24	5967.94
C1-SUM_lzGFP_BcF6_20X-6.tif:0699-0606	2472.53	4341.31
C1-SUM_lzGFP_BcF6_20X-6.tif:0630-0491	4172.53	7126.83
C1-SUM_lzGFP_BcF6_20X-6.tif:0587-0481	1934.67	3287.23
C1-SUM_lzGFP_BcF6_20X-6.tif:0593-0515	2981.75	4760.84
C1-SUM_lzGFP_BcF6_20X-6.tif:0575-0578	3513.47	5699.49
C1-SUM_lzGFP_BcF6_20X-6.tif:0535-0592	2563.9	4835.6
C1-SUM_lzGFP_BcF6_20X-6.tif:0680-0566	3245.13	5661.44
C1-SUM_lzGFP_BcF6_20X-6.tif:0797-0556	3955.15	6481.18
C1-SUM_lzGFP_BcF6_20X-6.tif:0896-0571	1587.94	2873.29
C1-SUM_lzGFP_BcF6_20X-6.tif:0849-0471	886.025	1594.8
C1-SUM_lzGFP_BcF6_20X-6.tif:0546-0445	891.955	2248.47
C1-SUM_lzGFP_BcF6_20X-6.tif:0830-0535	3800.06	6026.91
C1-SUM_lzGFP_BcF6_20X-6.tif:0851-0565	3416.13	5876.4
C1-SUM_lzGFP_BcF6_20X-6.tif:0768-0498	1467.75	3524.06
C1-SUM_lzGFP_BcF6_20X-6.tif:0702-0529	1629.86	2797.71
C1-SUM_lzGFP_BcF6_20X-6.tif:0521-0548	837.967	1435.08
C1-SUM_lzGFP_BcF6_20X-6.tif:0615-0299	382.601	415.844
C1-SUM_lzGFP_BcF6_20X-6.tif:0325-0526	554.199	1018.65
C1-SUM_lzGFP_BcF6_20X-8.tif:0002-0043	5214.65	8035.48
C1-SUM_lzGFP_BcF6_20X-8.tif:0003-0163	3803.93	5197.12
C1-SUM_lzGFP_BcF6_20X-8.tif:0004-0216	3652.66	5750.63
C1-SUM_lzGFP_BcF6_20X-8.tif:0007-0269	2797.41	3656.78
C1-SUM_lzGFP_BcF6_20X-8.tif:0008-0326	3178.64	4278.68
C1-SUM_lzGFP_BcF6_20X-8.tif:0009-0323	3157.56	4146.57
C1-SUM_lzGFP_BcF6_20X-8.tif:0010-0351	4892.53	6332.79
C1-SUM_lzGFP_BcF6_20X-8.tif:0012-0393	4757.47	5222.61
C1-SUM_lzGFP_BcF6_20X-8.tif:0013-0401	3997.51	4666.27
C1-SUM_lzGFP_BcF6_20X-8.tif:0016-0429	3152.02	3710.94
C1-SUM_lzGFP_BcF6_20X-8.tif:0017-0469	3920.3	5524.42
C1-SUM_lzGFP_BcF6_20X-8.tif:0018-0483	3520.02	5279.36
C1-SUM_lzGFP_BcF6_20X-8.tif:0019-0487	3115.16	5380.4
C1-SUM_lzGFP_BcF6_20X-8.tif:0020-0521	3578.02	6142.45
C1-SUM_lzGFP_BcF6_20X-8.tif:0021-0552	3378.14	5801.74
C1-SUM_lzGFP_BcF6_20X-8.tif:0022-0574	3165.43	5111.01
C1-SUM_lzGFP_BcF6_20X-8.tif:0023-0585	3353.36	5025.81
C1-SUM_lzGFP_BcF6_20X-8.tif:0024-0583	4705.19	8846.13
C1-SUM_lzGFP_BcF6_20X-8.tif:0025-0591	3937.78	5797.69
C1-SUM_lzGFP_BcF6_20X-8.tif:0026-0598	2682.85	5498.19
C1-SUM_lzGFP_BcF6_20X-8.tif:0027-0604	2972.33	3199.6
C1-SUM_lzGFP_BcF6_20X-8.tif:0028-0616	3244.37	4686.22
C1-SUM_lzGFP_BcF6_20X-8.tif:0029-0641	5637.35	6175.65
C1-SUM_lzGFP_BcF6_20X-8.tif:0031-0658	3465.09	4497.71
C1-SUM_lzGFP_BcF6_20X-8.tif:0034-0844	4316.69	8356.39
C1-SUM_lzGFP_BcF6_20X-8.tif:0035-0874	3651.21	6169.38
C1-SUM_lzGFP_BcF6_20X-8.tif:0036-0872	3302.61	6005.35
C1-SUM_lzGFP_BcF6_20X-8.tif:0037-0907	2972.31	3996.97
C1-SUM_lzGFP_BcF6_20X-8.tif:0038-0924	4042.97	4697.08
C1-SUM_lzGFP_BcF6_20X-8.tif:0039-0962	4147.26	6390.45
C1-SUM_lzGFP_BcF6_20X-8.tif:0538-0651	1027.51	2671.99
C1-SUM_lzGFP_BcF6_20X-8.tif:0329-0740	603.655	1037.77
C1-SUM_lzGFP_BcF6_20X-8.tif:0148-0765	648.479	955.623
C1-SUM_lzGFP_BcF6_20X-8.tif:0138-0594	1333.13	2308.69
C1-SUM_lzGFP_BcF6_20X-8.tif:0155-0416	849.923	1316.82
C1-SUM_lzGFP_BcF6_20X-8.tif:0171-0457	681.833	1760
C1-SUM_lzGFP_BcF6_20X-8.tif:0534-0384	1089.96	2984.18
C1-SUM_lzGFP_BcF6_20X-8.tif:0727-0601	832.558	4186.17
C1-SUM_lzGFP_BcF6_20X-8.tif:0825-0582	1065.83	3090.86
C1-SUM_lzGFP_BcF6_20X-8.tif:0934-0733	996.473	2402.6
C1-SUM_lzGFP_BcF6_20X-8.tif:0628-0896	519.87	782.028
C1-SUM_lzGFP_BcF6_20X-8.tif:0353-0634	646.425	1401.5
C1-SUM_lzGFP_BcF6_20X-8.tif:0306-0353	1420.2	3315.59
C1-SUM_lzGFP_BcF6_20X-8.tif:0646-0321	527.975	1073.5
C1-SUM_lzGFP_BcF6_20X-8.tif:0835-0504	1099.79	1361.5
C1-SUM_lzGFP_BcF6_20X-8.tif:0801-0465	3692.74	5303.13
C1-SUM_lzGFP_BcF6_20X-8.tif:0726-0456	2322.09	2439.39
C1-SUM_lzGFP_BcF6_20X-8.tif:0452-0484	2617.1	4386.55
C1-SUM_lzGFP_BcF6_20X-8.tif:0375-0471	4020.82	6374.86
C1-SUM_lzGFP_BcF6_20X-8.tif:0371-0440	3041.35	5497.9
C1-SUM_lzGFP_BcF6_20X-8.tif:0231-0460	1456.96	1270.28
C1-SUM_lzGFP_BcF6_20X-8.tif:0419-0618	1648.53	2986.29
C1-SUM_lzGFP_BcF6_20X-8.tif:0531-0582	1367.28	2645.94
C1-SUM_lzGFP_BcF6_20X-8.tif:0776-0415	2159.25	3913.06
C1-SUM_lzGFP_BcF6_20X-8.tif:0642-0386	1848.55	2753.32
C1-SUM_lzGFP_BcF6_20X-8.tif:0668-0410	2632.48	5820.6
C1-SUM_lzGFP_BcF6_20X-8.tif:0687-0381	1848.93	4862.92
