# Supplementary material for: A single-cell survey of Drosophila blood
Source: eLife. 2020 May 12;9:e54818. doi: 10.7554/eLife.54818 (PMC7237219; doi:10.7554/eLife.54818)
Supplement: Figure 5—source data 1. [file elife-54818-fig5-data1.xlsx]

## Sheet: Figure 5B
Cluster	injured_indrop_PC1	injured_indrop_PC2	injured_tenx_B2	injured_tenx_B4	UNinjured_indrop_UC1	UNinjured_indrop_UC2	UNinjured_tenx_B1	UNinjured_tenx_B3	WASP120hr_dropseq_PI48CIRC1	WASP120hr_dropseq_PI48CIRC2	WASP120hr_dropseq_PI48CIRC3	WASP96hr_dropseq_PI24CIRC1	WASP96hr_dropseq_PI24CIRC2	WASP96hr_dropseq_PI24CIRC3
0	285	188	171	170	137	2	51	112	907	1009	1267	70	326	328
1	49	22	35	22	0	1	0	0	260	381	538	6	10	41
2	26	46	28	9	5	10	16	1	122	117	405	1	10	65
3	4	0	1	5	1	0	0	0	21	45	24	0	0	3
4	4	0	3	0	0	0	1	0	7	5	8	0	0	0
	368	256	238	206	143	13	68	113	1317	1557	2242	77	346	437
	77.4457	73.4375	71.8487	82.5243	95.8042	15.3846	75	99.115	68.8686	64.8041	56.512	90.9091	94.2197	75.0572
	13.3152	8.59375	14.7059	10.6796	0	7.69231	0	0	19.7418	24.4701	23.9964	7.79221	2.89017	9.38215
	7.06522	17.9688	11.7647	4.36893	3.4965	76.9231	23.5294	0.884956	9.26348	7.51445	18.0642	1.2987	2.89017	14.8741
	1.08696	0	0.420168	2.42718	0.699301	0	0	0	1.59453	2.89017	1.07047	0	0	0.686499
	1.08696	0	1.2605	0	0	0	1.47059	0	0.531511	0.32113	0.356824	0	0	0
	Wounded	Unwounded	Wasp inf. 48h	Wasp inf. 24h
LM sum	1068	1511	5116	860		814	302	3183	724
						128	1	1179	57
% of LM1	76.2172	19.9868	62.2166	84.186		109	32	644	76
% of LM2	11.985	0.0661813	23.0453	6.62791		10	1	90	3
% of LM3	10.206	2.1178	12.588	8.83721		7	1	20	0
% of LM4	0.93633	0.0661813	1.75919	0.348837
% of CC	0.655431	0.0661813	0.39093	0
