# Supplementary material for: A single-cell survey of Drosophila blood
Source: eLife. 2020 May 12;9:e54818. doi: 10.7554/eLife.54818 (PMC7237219; doi:10.7554/eLife.54818)
Supplement: Figure 5—source data 2. [file elife-54818-fig5-data2.xlsx]

## Sheet: Sheet1
date	Atilla+		Drip+Atilla+			Average of ROIs	Atilla+		Drip+Atilla+		% of Drip+Atilla+LMs
	Unwounded	Wounded	Unwounded	Wounded			Unwounded	Wounded	Unwounded	Wounded	Unwounded	Wounded
2019-03-05	0	10	0	9		2019-03-05	0	9	0	7.75	0	86.1111
	0	10	0	10
	0	13	0	9
	0	3	0	3
2019-04-24	0	18	0	18	2 Atilla-Drip+	2019-04-24	0	12	0	12	0	100
	0	6	0	6	2 Atilla-Drip+
2019-04-18	0	26	0	22		2019-04-18	0	31	0	26	0	83.871
	0	36	0	30
										Average	0	89.994
										Std. deviation	0	8.73752
										ttest		5.8018e-05
										Biological replicates		n=3
