# Supplementary material for: A single-cell survey of Drosophila blood
Source: eLife. 2020 May 12;9:e54818. doi: 10.7554/eLife.54818 (PMC7237219; doi:10.7554/eLife.54818)
Supplement: Supplementary file 1. [file elife-54818-supp1.xlsx]

## Sheet: Sheet1
Sample	Technology	LibraryID	Mean Reads per cell	nGene before filter	nGene after filter	nCell before filter	nCell after filter	nUMI before filter	nUMI after filter
Unwounded	10x Genomics	UNinjured_10x_B1	151186	7884	7761	771	769	1314541	1313101
Unwounded	10x Genomics	UNinjured_10x_B3	125046	11427	9310	819	806	4315149	4260059
Unwounded	inDrop	UNinjured_indrop_UC1 (blood2_TAAGGCTC)	10985	8704	8649	2302	2043	6093210	5995893
Unwounded	inDrop	UNinjured_indrop_UC2 (blood3_TAAGGCTC)	4434.34	8223	7652	2832	492	1592624	623998
Wounded	10x Genomics	injured_10x_B2	38032	9278	8763	2399	2378	6113115	6065925
Wounded	10x Genomics	injured_10x_B4	54985	12314	9661	2141	2123	9980153	9873165
Wounded	inDrop	injured_indrop_PC1 (blood2_CTTAATAG)	9180.12	9879	9241	1965	1782	5297665	5185421
Wounded	inDrop	injured_indrop_PC2 (blood3_TCGCATAA)	12368.4	10193	9391	2895	2895	7638936	7635843
Wasp inf. 24h	Drop-seq	WASP96hr_dropseq_PI24CIRC1	453382	10929	8740	210	181	3568012	2696915
Wasp inf. 24h	Drop-seq	WASP96hr_dropseq_PI24CIRC2	39289	11185	9073	2015	1976	15597257	14504030
Wasp inf. 24h	Drop-seq	WASP96hr_dropseq_PI24CIRC3	16389	11551	9204	4103	4013	18754477	17452765
Wasp inf. 48h	Drop-seq	WASP120hr_dropseq_PI48CIRC1	46506	12179	9346	1910	1837	16018908	14921344
Wasp inf. 48h	Drop-seq	WASP120hr_dropseq_PI48CIRC2	42901	12290	9360	2082	2037	17529810	16425088
Wasp inf. 48h	Drop-seq	WASP120hr_dropseq_PI48CIRC3	46926	13632	9584	3176	3013	27569175	25231184
