# Supplementary material for: A single-cell survey of Drosophila blood
Source: eLife. 2020 May 12;9:e54818. doi: 10.7554/eLife.54818 (PMC7237219; doi:10.7554/eLife.54818)
Supplement: Supplementary file 2. [file elife-54818-supp2.xlsx]

## Sheet: PM1
gene	cluster0.p_val	cluster0.avg_logFC	cluster0.pct.1	cluster0.pct.2	cluster0.p_val_adj
18SrRNA-Psi:CR45861	1.02881e-53	0.933001	0.271	0.197	1.06914e-49
18SrRNA:CR45841	6.6818e-40	0.923301	0.305	0.248	6.94373e-36
18SrRNA:CR45838	1.18947e-39	0.921247	0.309	0.253	1.23609e-35
18SrRNA:CR41548	6.6613e-39	0.90816	0.312	0.255	6.92242e-35
pre-rRNA:CR45856	1.35953e-28	0.837518	0.354	0.315	1.41282e-24
28SrRNA:CR45837	6.88939e-45	0.724858	0.237	0.172	7.15946e-41
28SrRNA:CR45844	5.32523e-35	0.696824	0.344	0.294	5.53398e-31
18SrRNA-Psi:CR41602	2.76728e-34	0.692711	0.459	0.446	2.87576e-30
pre-rRNA:CR45847	1.53115e-27	0.679142	0.389	0.35	1.59117e-23
28SrRNA-Psi:CR45848	6.88131e-43	0.664781	0.183	0.124	7.15106e-39
pre-rRNA:CR45846	8.46304e-23	0.643752	0.382	0.346	8.79479e-19
28SrRNA-Psi:CR40596	1.16366e-73	0.6393	0.489	0.443	1.20928e-69
28SrRNA-Psi:CR45851	2.84051e-34	0.630542	0.337	0.283	2.95186e-30
pre-rRNA:CR45845	1.00327e-18	0.622409	0.516	0.519	1.0426e-14
28SrRNA-Psi:CR40741	2.09934e-18	0.551323	0.178	0.147	2.18164e-14
28SrRNA-Psi:CR45860	2.83227e-17	0.511548	0.144	0.111	2.94329e-13
28SrRNA-Psi:CR45859	2.38296e-10	0.411133	0.336	0.338	2.47638e-06
fmt	1.54431e-08	0.40115	0.538	0.628	0.000160485
CG43110	2.86534e-15	0.388844	0.183	0.151	2.97766e-11
CG6191	1.06229e-07	0.372813	0.371	0.375	0.00110394
trol	0.0208524	0.325462	0.404	0.455	1
28SrRNA-Psi:CR41609	5.2581e-07	0.317862	0.092	0.076	0.00546422
CG42807	7.00342e-11	0.289291	0.546	0.587	7.27796e-07
mt:lrRNA	3.29351e-128	0.267652	1	1	3.42262e-124
28SrRNA-Psi:CR45855	0.848876	0.253233	0.148	0.163	1
regucalcin	1.69304e-113	0.227204	0.973	0.959	1.75941e-109
Ttc19	5.207e-06	0.226553	0.121	0.106	0.0541111
TwdlE	0.00104727	0.215689	0.172	0.164	1
wech	0.473395	0.202992	0.229	0.262	1
stg	0.125057	0.200697	0.373	0.413	1
PH4alphaEFB	5.06736e-12	0.199725	0.258	0.343	5.266e-08
bru3	0.673785	0.196354	0.118	0.128	1
Ppn	5.32653e-40	0.19184	0.908	0.897	5.53533e-36
TRAM	8.47566e-05	0.19024	0.342	0.445	0.880791
Sec61alpha	8.63783e-05	0.189448	0.607	0.734	0.897644
CG42322	0.0124906	0.188417	0.162	0.158	1
Syp	5.36722e-13	0.187483	0.707	0.803	5.57761e-09
mt:ND2	0.0170069	0.186565	0.538	0.663	1
l(1)G0320	0.0199537	0.182253	0.551	0.67	1
Inos	2.52631e-06	0.180981	0.636	0.695	0.0262534
spz	9.50624e-21	0.178785	0.733	0.807	9.87889e-17
mt:ND5	2.76907e-11	0.174513	0.818	0.894	2.87762e-07
Col4a1	2.21549e-32	0.170645	0.704	0.657	2.30234e-28
Hmu	1.32012e-08	0.170622	0.211	0.282	0.000137187
Tis11	0.215307	0.168457	0.573	0.698	1
mt:ND1	1.3446e-16	0.166148	0.833	0.908	1.39731e-12
CG8157	0.348754	0.164551	0.758	0.822	1
NtR	5.99663e-12	0.162212	0.638	0.661	6.2317e-08
CG4951	0.000250459	0.162119	0.145	0.18	1
mt:srRNA	0.200195	0.161085	0.543	0.653	1
eater	0.00258781	0.158732	0.581	0.64	1
HmgD	2.66639e-15	0.154407	0.762	0.834	2.77091e-11
CG10932	3.97438e-06	0.153204	0.272	0.352	0.0413018
Surf4	9.64815e-06	0.152071	0.427	0.565	0.100264
Bacc	5.95054e-14	0.151676	0.817	0.868	6.18381e-10
Hml	1.41294e-40	0.15158	0.925	0.894	1.46833e-36
lncRNA:alphagamma-element:CR32865	0.000144361	0.150017	0.091	0.115	1
CG42259	6.15774e-52	-0.150526	0.045	0.112	6.39912e-48
C3G	4.76307e-90	-0.151177	0.127	0.268	4.94978e-86
tsr	4.81513e-53	-0.15134	0.937	0.984	5.00388e-49
Lip4	2.27968e-56	-0.152801	0.044	0.113	2.36904e-52
Adgf-A	6.53945e-71	-0.152818	0.285	0.456	6.7958e-67
CG13364	6.20171e-95	-0.152887	0.349	0.567	6.44481e-91
Treh	5.75152e-44	-0.153013	0.129	0.224	5.97698e-40
JhI-26	8.43023e-65	-0.15378	0.064	0.152	8.76069e-61
Baldspot	7.8189e-87	-0.154719	0.362	0.574	8.1254e-83
dpr17	1.04328e-51	-0.156194	0.063	0.136	1.08418e-47
twf	6.53063e-89	-0.156772	0.122	0.257	6.78663e-85
Akap200	7.19733e-96	-0.158395	0.359	0.582	7.47946e-92
schlank	7.3554e-73	-0.158678	0.492	0.711	7.64373e-69
Chmp1	2.551e-85	-0.15914	0.27	0.455	2.651e-81
Pmp70	8.11909e-110	-0.159314	0.08	0.214	8.43736e-106
Syx1A	3.26813e-91	-0.159601	0.293	0.498	3.39624e-87
PGRP-LB	4.3456e-46	-0.160284	0.042	0.102	4.51595e-42
CG5346	1.11095e-95	-0.161501	0.152	0.303	1.1545e-91
CG1890	5.65285e-83	-0.16177	0.404	0.618	5.87444e-79
CG42674	1.44383e-80	-0.162125	0.166	0.308	1.50043e-76
N	4.42077e-65	-0.162405	0.277	0.44	4.59406e-61
trio	3.95997e-77	-0.162807	0.161	0.298	4.1152e-73
CG13887	3.00005e-77	-0.163002	0.351	0.56	3.11765e-73
ghi	2.42349e-110	-0.16339	0.195	0.381	2.51849e-106
CG11791	6.88875e-94	-0.163469	0.222	0.402	7.15879e-90
Myo31DF	3.99041e-99	-0.165375	0.22	0.406	4.14684e-95
Tsp42Ee	1.01503e-54	-0.165459	0.533	0.693	1.05482e-50
Hsc70-4	7.14983e-72	-0.165561	0.852	0.958	7.43011e-68
Nph	2.77811e-83	-0.165771	0.343	0.542	2.88701e-79
Rab11	1.2354e-65	-0.166025	0.67	0.855	1.28383e-61
Cyt-c-p	1.01874e-72	-0.169091	0.405	0.596	1.05867e-68
CG18547	8.36552e-65	-0.169274	0.044	0.12	8.69345e-61
Hsp70Ab	7.02429e-38	-0.16929	0.064	0.125	7.29965e-34
GstD3	1.36596e-68	-0.16977	0.296	0.47	1.41951e-64
Alh	2.68257e-99	-0.169798	0.095	0.226	2.78773e-95
CG7956	5.23903e-79	-0.170189	0.038	0.122	5.4444e-75
shrb	1.81612e-86	-0.171846	0.309	0.507	1.88731e-82
sano	2.33423e-53	-0.172161	0.025	0.082	2.42574e-49
Jupiter	9.33164e-70	-0.172643	0.479	0.701	9.69744e-66
Vrp1	1.46987e-71	-0.172766	0.084	0.185	1.52749e-67
CG32264	2.25282e-97	-0.172775	0.071	0.188	2.34113e-93
CG31523	1.24709e-122	-0.173995	0.117	0.28	1.29598e-118
Naxd	1.41966e-60	-0.174102	0.125	0.236	1.47531e-56
Pof	4.03765e-66	-0.17413	0.037	0.111	4.19592e-62
CG32267	6.27008e-121	-0.175551	0.254	0.477	6.51587e-117
Tsp42Ed	7.42927e-70	-0.176065	0.124	0.242	7.7205e-66
IP3K1	1.50045e-66	-0.176479	0.138	0.255	1.55927e-62
Prx2540-1	7.90555e-55	-0.178071	0.012	0.06	8.21545e-51
Hsp27	3.86411e-101	-0.178238	0.223	0.41	4.01559e-97
Dyak-FKBP59	2.40816e-64	-0.178441	0.17	0.294	2.50256e-60
Scgdelta	8.41508e-30	-0.179084	0.029	0.068	8.74495e-26
Hsp70Aa	8.85855e-41	-0.179574	0.06	0.123	9.20581e-37
Diap1	9.36166e-109	-0.179925	0.178	0.354	9.72864e-105
cact	4.26494e-90	-0.18024	0.162	0.312	4.43213e-86
Mob2	4.80971e-108	-0.180417	0.169	0.34	4.99825e-104
CG17841	4.16732e-80	-0.181697	0.118	0.242	4.33068e-76
rhea	9.26351e-101	-0.182184	0.247	0.448	9.62664e-97
La	1.26039e-104	-0.183187	0.222	0.413	1.30979e-100
CG1943	1.03073e-95	-0.183703	0.446	0.676	1.07113e-91
Pfdn1	2.43351e-123	-0.1846	0.172	0.359	2.5289e-119
GstE6	2.7391e-84	-0.185664	0.315	0.505	2.84647e-80
CG17760	1.7221e-63	-0.190983	0.17	0.291	1.78961e-59
pyr	3.9328e-80	-0.191817	0.016	0.084	4.08697e-76
Mmp2	8.25913e-66	-0.193806	0.041	0.117	8.58288e-62
Hsp23	3.00093e-56	-0.193924	0.286	0.424	3.11857e-52
mew	2.75302e-100	-0.194863	0.07	0.19	2.86094e-96
RhoGAP18B	1.18745e-112	-0.196116	0.146	0.31	1.234e-108
hebe	2.56057e-64	-0.197651	0.05	0.127	2.66095e-60
path	7.20686e-88	-0.19815	0.095	0.217	7.48937e-84
CG5953	1.87561e-93	-0.198513	0.105	0.233	1.94913e-89
Gapdh2	5.42028e-59	-0.198975	0.359	0.53	5.63275e-55
Gdap2	8.44232e-102	-0.199847	0.063	0.178	8.77326e-98
ZnT63C	4.95466e-133	-0.200033	0.142	0.323	5.14889e-129
Pvf2	2.41155e-91	-0.200768	0.036	0.128	2.50608e-87
ifc	5.04348e-118	-0.200979	0.304	0.533	5.24119e-114
wun2	1.48083e-84	-0.201491	0.011	0.077	1.53888e-80
CG10602	8.20096e-88	-0.204934	0.173	0.333	8.52244e-84
NK7.1	1.70264e-98	-0.205882	0.051	0.157	1.76938e-94
asRNA:CR46093	3.34248e-46	-0.205966	0.023	0.071	3.47351e-42
CG16710	1.18169e-90	-0.210305	0.011	0.081	1.22801e-86
Ance	3.17008e-33	-0.211052	0.448	0.609	3.29434e-29
CG43210	4.90617e-74	-0.21146	0.172	0.302	5.0985e-70
spir	1.0178e-96	-0.216477	0.035	0.128	1.0577e-92
CG32066	1.08096e-108	-0.217514	0.177	0.349	1.12333e-104
tna	7.38251e-63	-0.219484	0.092	0.188	7.67191e-59
alphaTub84B	1.21735e-76	-0.219622	0.861	0.953	1.26507e-72
Rac2	1.45318e-95	-0.221716	0.496	0.727	1.51015e-91
CG6006	4.04853e-63	-0.22304	0.095	0.192	4.20723e-59
Jra	6.04271e-65	-0.226371	0.309	0.455	6.27959e-61
Hsp26	2.50962e-72	-0.229547	0.31	0.466	2.60799e-68
CG5828	2.02441e-49	-0.229899	0.024	0.076	2.10377e-45
CG10126	4.11097e-81	-0.231486	0.035	0.119	4.27212e-77
CAP	7.33397e-96	-0.23371	0.06	0.169	7.62146e-92
Hsp83	6.27407e-73	-0.235554	0.814	0.927	6.52002e-69
Gip	1.57788e-41	-0.235776	0.139	0.233	1.63973e-37
chn	7.16156e-114	-0.237353	0.065	0.19	7.4423e-110
capu	3.46011e-136	-0.239328	0.122	0.295	3.59575e-132
Ctr1A	2.78057e-59	-0.239458	0.136	0.248	2.88957e-55
Gprk2	1.51735e-148	-0.240681	0.111	0.286	1.57683e-144
Ggamma30A	4.55041e-51	-0.242263	0.345	0.485	4.72878e-47
aay	1.6329e-49	-0.242501	0.016	0.064	1.69691e-45
Gclc	5.03119e-112	-0.24582	0.119	0.267	5.22842e-108
CG44325	2.48352e-73	-0.246848	0.02	0.086	2.58087e-69
mthl2	8.65597e-86	-0.251398	0.32	0.509	8.99528e-82
CG12112	5.076e-133	-0.251757	0.11	0.272	5.27498e-129
Ac78C	3.01316e-114	-0.25219	0.056	0.176	3.13128e-110
AnxB9	3.80397e-85	-0.252755	0.617	0.819	3.95309e-81
Fim	9.68864e-134	-0.253028	0.289	0.517	1.00684e-129
prage	2.76839e-131	-0.253669	0.07	0.209	2.87692e-127
CG16713	2.84668e-41	-0.255612	0.021	0.066	2.95827e-37
Arc2	8.28758e-103	-0.256746	0.095	0.225	8.61245e-99
shot	3.95205e-101	-0.257391	0.229	0.424	4.10697e-97
Nrt	1.75019e-83	-0.258454	0.073	0.177	1.8188e-79
Syb	3.05761e-107	-0.258512	0.561	0.789	3.17747e-103
CG33494	9.44612e-98	-0.261286	0.587	0.799	9.81641e-94
mthl10	3.02622e-32	-0.262589	0.022	0.06	3.14485e-28
lncRNA:CR40469	7.38656e-34	-0.264296	0.317	0.417	7.67612e-30
CG44250	1.43944e-69	-0.265622	0.134	0.246	1.49587e-65
Rel	2.26982e-95	-0.26658	0.278	0.452	2.3588e-91
cl	3.8266e-127	-0.267349	0.392	0.639	3.9766e-123
Cam	1.91622e-73	-0.267895	0.907	0.978	1.99134e-69
Dro	6.12527e-29	-0.267957	0.035	0.076	6.36538e-25
rgn	2.04938e-99	-0.2731	0.067	0.182	2.12972e-95
LamC	2.47898e-96	-0.273329	0.24	0.408	2.57615e-92
Hsp68	4.06112e-80	-0.275236	0.136	0.263	4.22032e-76
CG1648	1.5034e-46	-0.275254	0.156	0.251	1.56234e-42
lncRNA:CR44430	1.31435e-91	-0.282418	0.006	0.072	1.36587e-87
Hsp70Bc	9.814e-91	-0.285607	0.143	0.282	1.01987e-86
CG6023	1.37849e-46	-0.287669	0.023	0.073	1.43253e-42
CG43236	5.66104e-90	-0.288417	0.211	0.376	5.88295e-86
CG12133	3.35634e-73	-0.297612	0.025	0.094	3.48791e-69
fax	1.47697e-60	-0.301032	0.273	0.41	1.53487e-56
RapGAP1	1.11168e-78	-0.303472	0.304	0.482	1.15526e-74
CG10469	9.17311e-44	-0.307778	0.05	0.111	9.53269e-40
Fkbp59	1.42596e-48	-0.312166	0.128	0.224	1.48186e-44
loco	1.01263e-157	-0.313042	0.161	0.36	1.05233e-153
IM18	1.26691e-45	-0.319349	0.044	0.103	1.31657e-41
CG9932	2.91917e-103	-0.322119	0.221	0.395	3.03361e-99
tx	1.92348e-114	-0.324911	0.045	0.156	1.99888e-110
CG18754	1.06708e-64	-0.343505	0.005	0.052	1.10891e-60
CG42394	1.28512e-73	-0.344866	0.513	0.689	1.3355e-69
mys	8.47571e-138	-0.350257	0.322	0.558	8.80796e-134
CG2556	8.26948e-61	-0.360741	0.013	0.064	8.59364e-57
CG7860	9.16453e-22	-0.361197	0.036	0.071	9.52378e-18
Glut4EF	2.01022e-166	-0.362445	0.097	0.274	2.08902e-162
CG13117	3.41351e-150	-0.366677	0.465	0.709	3.54731e-146
Atox1	1.15349e-70	-0.379124	0.249	0.414	1.19871e-66
mthl4	1.0936e-78	-0.388192	0.085	0.188	1.13647e-74
CG31219	1.05969e-139	-0.400817	0.057	0.193	1.10123e-135
lncRNA:CR43855	1.91239e-53	-0.419373	0.481	0.63	1.98735e-49
CG3348	7.08885e-88	-0.447253	0.109	0.227	7.36673e-84
CecB	2.07009e-89	-0.465205	0.027	0.11	2.15124e-85
Men	1.69523e-39	-0.470539	0.378	0.541	1.76168e-35
PPO3	2.10304e-59	-0.491757	0.017	0.071	2.18548e-55
lncRNA:CR44316	1.10214e-55	-0.502909	0.083	0.164	1.14535e-51
Arc1	5.41789e-125	-0.563371	0.419	0.625	5.63027e-121
CecA1	4.94938e-122	-0.624306	0.027	0.13	5.1434e-118
CG43175	1.98204e-135	-0.628665	0.141	0.309	2.05974e-131
Drs	3.46893e-45	-0.633772	0.15	0.237	3.60491e-41
CG33225	3.18167e-158	-0.698925	0.103	0.271	3.30639e-154
Mmp1	5.65733e-168	-0.780259	0.187	0.38	5.8791e-164
CG15784	1.20962e-142	-0.830368	0.077	0.223	1.25704e-138
CecA2	6.86097e-116	-0.835835	0.048	0.16	7.12992e-112
atilla	3.58325e-44	-0.865226	0.039	0.094	3.72372e-40
alphaTub85E	1.48824e-80	-0.870863	0.16	0.288	1.54658e-76
CG15347	3.20795e-113	-0.898636	0.145	0.291	3.3337e-109
Mtk	5.19153e-39	-0.919827	0.212	0.302	5.39503e-35
CecC	2.60932e-172	-1.00867	0.093	0.258	2.71161e-168
CG10467	1.21542e-51	-1.03517	0.058	0.13	1.26307e-47
CG14610	8.27546e-63	-1.10638	0.014	0.067	8.59985e-59
betaTub60D	1.12484e-95	-1.29338	0.029	0.116	1.16893e-91
MtnA	3.74418e-115	-1.35984	0.178	0.35	3.89095e-111
fok	2.8642e-48	-1.38702	0.057	0.124	2.97648e-44
PPO1	2.17657e-61	-2.0355	0.143	0.252	2.2619e-57
PPO2	6.32749e-66	-2.29023	0.197	0.328	6.57553e-62

## Sheet: PM2
gene	cluster2.p_val	cluster2.avg_logFC	cluster2.pct.1	cluster2.pct.2	cluster2.p_val_adj
Pen	3.65468e-250	0.586369	0.785	0.448	3.79794e-246
polo	9.76508e-217	0.489288	0.448	0.169	1.01479e-212
CycB	6.3675e-233	0.487724	0.401	0.133	6.61711e-229
scra	1.13815e-213	0.469117	0.46	0.176	1.18276e-209
sip2	1.47294e-214	0.37732	0.301	0.086	1.53067e-210
tum	1.54708e-168	0.374245	0.352	0.13	1.60772e-164
aurB	2.29893e-189	0.366324	0.366	0.13	2.38905e-185
cmet	1.30816e-193	0.366226	0.278	0.081	1.35944e-189
stg	8.57414e-119	0.365888	0.635	0.364	8.91025e-115
msd1	6.53128e-181	0.36526	0.33	0.114	6.78731e-177
ncd	8.2165e-192	0.362156	0.342	0.114	8.53859e-188
CG8860	2.08044e-66	0.344778	0.749	0.591	2.16199e-62
Cks30A	5.28823e-163	0.339628	0.307	0.106	5.49553e-159
CG42232	4.38607e-142	0.338139	0.456	0.212	4.55801e-138
Klp61F	3.06836e-161	0.328525	0.295	0.099	3.18863e-157
Incenp	5.99904e-141	0.325242	0.331	0.13	6.23421e-137
pav	4.11916e-182	0.315025	0.279	0.083	4.28063e-178
Ote	1.13148e-128	0.306993	0.372	0.164	1.17583e-124
Hsp68	7.40162e-55	0.302831	0.344	0.2	7.69176e-51
Mink	3.89393e-151	0.298833	0.294	0.103	4.04657e-147
UQCR-11	2.03086e-62	0.293316	0.535	0.348	2.11047e-58
mud	2.93071e-124	0.289416	0.27	0.1	3.04559e-120
sle	3.63983e-91	0.286766	0.53	0.309	3.78251e-87
nesd	7.94323e-146	0.282304	0.256	0.084	8.2546e-142
Poc1	5.71427e-126	0.276781	0.274	0.101	5.93827e-122
sti	5.6832e-136	0.272274	0.236	0.076	5.90598e-132
glob1	9.41114e-125	0.262561	0.236	0.081	9.78006e-121
Hsp70Bc	8.47084e-45	0.261067	0.351	0.216	8.8029e-41
UQCR-6.4	1.51197e-73	0.260479	0.654	0.443	1.57124e-69
Fkbp39	4.21516e-69	0.258988	0.455	0.264	4.38039e-65
bt	9.95359e-47	0.258046	0.184	0.089	1.03438e-42
COX8	2.51255e-57	0.257919	0.553	0.366	2.61104e-53
CG10863	2.54436e-74	0.252893	0.594	0.381	2.6441e-70
jumu	6.9584e-100	0.251177	0.284	0.118	7.23117e-96
Klp67A	1.06308e-111	0.250757	0.209	0.07	1.10475e-107
ND-ACP	9.0363e-74	0.247567	0.445	0.25	9.39052e-70
feo	2.01218e-106	0.245369	0.28	0.113	2.09106e-102
ATPsynG	7.96401e-49	0.237475	0.628	0.457	8.2762e-45
PCNA	5.98732e-68	0.237426	0.433	0.251	6.22202e-64
CG34437	2.58075e-50	0.237084	0.762	0.593	2.68191e-46
aurA	3.08939e-126	0.231853	0.17	0.046	3.21049e-122
SmF	2.49474e-62	0.229867	0.496	0.316	2.59254e-58
SNRPG	4.21898e-67	0.227902	0.451	0.26	4.38436e-63
msb1l	2.30604e-134	0.227854	0.182	0.049	2.39643e-130
ox	6.25563e-56	0.227267	0.734	0.545	6.50086e-52
Bub3	1.83963e-83	0.225844	0.352	0.178	1.91174e-79
CG12702	7.65552e-107	0.225022	0.195	0.064	7.95562e-103
Cys	2.61834e-34	0.221476	0.634	0.486	2.72098e-30
lectin-24Db	9.14266e-48	0.221051	0.643	0.472	9.50105e-44
Phf5a	5.37801e-72	0.216599	0.383	0.212	5.58882e-68
msd5	1.51646e-86	0.21586	0.208	0.081	1.5759e-82
CG6084	6.98605e-55	0.215708	0.908	0.745	7.2599e-51
SmE	5.3546e-60	0.214798	0.579	0.385	5.5645e-56
Cdk1	6.78872e-76	0.213198	0.329	0.167	7.05483e-72
CG15211	6.47943e-67	0.21284	0.684	0.463	6.73343e-63
Sodh-2	7.33219e-66	0.212355	0.457	0.271	7.61961e-62
CG14688	9.09104e-86	0.212252	0.171	0.06	9.44741e-82
Sps1	1.66727e-83	0.21159	0.294	0.133	1.73263e-79
alc	2.19843e-59	0.210564	0.555	0.362	2.28461e-55
geminin	1.07163e-75	0.21042	0.482	0.281	1.11364e-71
mad2	5.57669e-94	0.208553	0.234	0.093	5.79529e-90
ND-B14.5B	2.40473e-58	0.207334	0.633	0.433	2.499e-54
fzy	3.83146e-94	0.206884	0.235	0.092	3.98165e-90
Pxn	1.29168e-37	0.204833	0.869	0.786	1.34231e-33
mRpS21	4.73476e-70	0.204736	0.404	0.229	4.92037e-66
ATPsynCF6	6.02579e-54	0.204082	0.574	0.373	6.262e-50
borr	4.3186e-93	0.204017	0.285	0.124	4.48789e-89
nAChRbeta3	3.18682e-44	0.203289	0.777	0.591	3.31174e-40
HmgZ	3.64512e-57	0.202788	0.896	0.713	3.788e-53
SMC2	3.00225e-80	0.202337	0.252	0.112	3.11993e-76
CG1265	2.95912e-72	0.200988	0.33	0.17	3.07512e-68
Klp3A	7.32987e-83	0.197829	0.178	0.064	7.6172e-79
CG8173	9.44909e-96	0.197193	0.172	0.057	9.81949e-92
COX5B	1.81562e-51	0.197085	0.527	0.337	1.88679e-47
Hsp83	2.20409e-61	0.196866	0.968	0.876	2.2905e-57
glu	6.91778e-69	0.196702	0.277	0.137	7.18896e-65
CG15922	2.11496e-68	0.194919	0.244	0.114	2.19786e-64
Map60	4.66153e-72	0.192955	0.269	0.128	4.84427e-68
Nnf1a	5.14254e-65	0.192844	0.307	0.161	5.34413e-61
regucalcin	1.99663e-41	0.192545	0.989	0.96	2.0749e-37
CG17776	1.04841e-58	0.192277	0.371	0.214	1.08951e-54
CG7272	3.90544e-79	0.191488	0.247	0.108	4.05853e-75
COX7C	2.15307e-42	0.18999	0.648	0.473	2.23747e-38
CG34200	3.6163e-47	0.189432	0.448	0.293	3.75806e-43
HDAC1	7.62019e-63	0.188762	0.292	0.146	7.9189e-59
eEF1beta	2.87147e-38	0.188281	0.665	0.499	2.98403e-34
mars	2.75478e-81	0.187901	0.179	0.066	2.86277e-77
CG33459	3.11456e-37	0.187356	0.299	0.187	3.23665e-33
ND-PDSW	1.01298e-50	0.187276	0.369	0.215	1.05269e-46
CG1943	9.57719e-54	0.186393	0.786	0.568	9.95261e-50
Fkbp12	1.14218e-33	0.185511	0.544	0.405	1.18695e-29
UQCR-Q	2.50414e-47	0.185248	0.826	0.664	2.60231e-43
Rpb10	4.07698e-45	0.185158	0.521	0.356	4.2368e-41
Myb	2.84379e-64	0.184913	0.363	0.2	2.95526e-60
Mcm7	7.40071e-71	0.184175	0.274	0.131	7.69082e-67
Ubx	4.30028e-28	0.183382	0.74	0.658	4.46885e-24
CG6650	2.6272e-68	0.182219	0.311	0.157	2.73018e-64
CG34232	4.18549e-33	0.182125	0.385	0.254	4.34956e-29
mRpL27	6.25646e-58	0.182022	0.361	0.209	6.50172e-54
Nup35	2.56446e-70	0.181275	0.262	0.124	2.66499e-66
Det	7.57167e-69	0.179722	0.259	0.125	7.86848e-65
Cenp-C	9.24814e-75	0.178142	0.173	0.065	9.61067e-71
ScsbetaG	2.49616e-56	0.177399	0.234	0.113	2.59401e-52
ksh	2.43894e-55	0.177215	0.341	0.196	2.53455e-51
mRpL36	2.2648e-58	0.175745	0.319	0.176	2.35358e-54
sun	4.9401e-34	0.175499	0.778	0.641	5.13375e-30
ATPsynB	5.41659e-49	0.175402	0.452	0.279	5.62892e-45
CG8478	9.17027e-91	0.174945	0.142	0.042	9.52974e-87
Spase12	8.1742e-36	0.174622	0.583	0.431	8.49463e-32
LSm7	8.32061e-46	0.174006	0.548	0.376	8.64678e-42
ND-13B	6.73417e-53	0.173474	0.29	0.154	6.99815e-49
kuk	2.62142e-56	0.173151	0.426	0.259	2.72418e-52
Fas1	4.28026e-71	0.171547	0.146	0.051	4.44804e-67
CG5498	5.19083e-76	0.17135	0.23	0.099	5.39431e-72
Rrp1	2.77186e-65	0.17103	0.368	0.203	2.88052e-61
COX5A	2.98375e-46	0.170716	0.488	0.311	3.10072e-42
ATPsynO	5.46275e-49	0.170446	0.43	0.262	5.67689e-45
Nup358	1.04233e-52	0.170362	0.374	0.22	1.08319e-48
Dref	1.81793e-60	0.169381	0.242	0.118	1.8892e-56
ubl	2.43269e-48	0.168941	0.414	0.26	2.52805e-44
Ssb-c31a	4.90017e-62	0.16867	0.548	0.342	5.09225e-58
CG43799	1.64732e-43	0.168217	0.464	0.299	1.71189e-39
mRpL34	2.66551e-54	0.167908	0.339	0.194	2.77e-50
Klp10A	7.91485e-56	0.167749	0.32	0.179	8.22511e-52
Tom7	1.7808e-40	0.167267	0.779	0.609	1.85061e-36
Uba2	1.7946e-50	0.166799	0.448	0.286	1.86495e-46
kud	1.54562e-46	0.16595	0.637	0.45	1.6062e-42
Cap-G	3.46623e-69	0.16539	0.18	0.072	3.60211e-65
fat-spondin	4.51263e-33	0.165088	0.667	0.516	4.68952e-29
CCT5	1.48307e-41	0.165037	0.529	0.346	1.5412e-37
ND-30	5.46574e-52	0.164567	0.325	0.179	5.68e-48
Mms19	3.20072e-60	0.163465	0.218	0.102	3.32619e-56
Dad1	8.52455e-42	0.16319	0.433	0.274	8.85872e-38
Kmn1	4.67616e-74	0.162844	0.144	0.049	4.85947e-70
CG34054	1.91785e-49	0.162211	0.323	0.183	1.99303e-45
Tapdelta	7.27012e-39	0.162196	0.849	0.685	7.55511e-35
HINT1	3.33003e-45	0.162064	0.555	0.365	3.46057e-41
eIF3i	1.02077e-43	0.161248	0.502	0.325	1.06079e-39
Stip1	2.54892e-55	0.160248	0.332	0.181	2.64884e-51
DppIII	1.36626e-50	0.159647	0.44	0.274	1.41981e-46
Galk	4.34625e-63	0.159522	0.228	0.106	4.51663e-59
Tig	1.26224e-40	0.159514	0.695	0.514	1.31172e-36
Echs1	1.38139e-42	0.159156	0.789	0.602	1.43554e-38
dpa	7.07535e-65	0.157878	0.239	0.111	7.3527e-61
pbl	1.98181e-67	0.157643	0.204	0.088	2.05949e-63
CG8501	3.44753e-20	0.156962	0.745	0.68	3.58267e-16
RhoGAP54D	1.68304e-85	0.156874	0.124	0.035	1.74901e-81
CG15093	1.83663e-40	0.156312	0.72	0.53	1.90862e-36
Mcm6	5.94539e-61	0.156115	0.223	0.104	6.17845e-57
Nuf2	9.39207e-70	0.154735	0.149	0.054	9.76024e-66
Sesn	1.09502e-47	0.154699	0.397	0.242	1.13795e-43
CG7630	6.12901e-32	0.154257	0.838	0.703	6.36927e-28
HP4	2.33478e-46	0.154224	0.396	0.248	2.4263e-42
CG12592	2.99821e-40	0.15415	0.116	0.049	3.11574e-36
SPARC	2.11029e-23	0.154127	0.747	0.658	2.19302e-19
COX6B	2.83668e-36	0.153966	0.582	0.41	2.94788e-32
asp	3.51886e-84	0.153181	0.119	0.033	3.6568e-80
bora	1.4861e-120	0.153096	0.088	0.013	1.54436e-116
Taldo	2.84473e-46	0.152802	0.324	0.184	2.95624e-42
CG4598	1.31269e-50	0.152767	0.371	0.221	1.36415e-46
ATPsynbeta	4.79595e-33	0.152656	0.638	0.468	4.98395e-29
Nph	1.87039e-30	0.152435	0.619	0.451	1.94371e-26
Pvr	1.29709e-50	0.151141	0.529	0.341	1.34794e-46
x16	4.85259e-49	0.150384	0.429	0.269	5.04282e-45
Chrac-14	8.59413e-62	0.150222	0.224	0.105	8.93102e-58
Dpck	1.67142e-63	0.150208	0.157	0.061	1.73694e-59
pst	0.371006	-0.150081	0.374	0.327	1
CG42807	8.10172e-11	-0.150263	0.711	0.552	8.41931e-07
Sap-r	0.136321	-0.152162	0.799	0.723	1
Spn55B	0.00760605	-0.152209	0.176	0.19	1
CG14253	0.0520269	-0.152451	0.524	0.48	1
CG44250	0.0374976	-0.152667	0.198	0.209	1
NimC1	0.020152	-0.154998	0.258	0.216	1
Gprk2	0.507985	-0.155162	0.235	0.224	1
PGRP-LB	0.000129072	-0.155253	0.063	0.084	1
Fit1	0.695009	-0.156048	0.274	0.251	1
drk	0.216678	-0.156692	0.383	0.354	1
Act5C	6.20579e-20	-0.156695	1	0.991	6.44906e-16
Lip4	1.57789e-06	-0.157437	0.064	0.092	0.0163974
wun2	2.93788e-17	-0.159226	0.018	0.059	3.05305e-13
Atg8a	0.00201463	-0.160259	0.605	0.547	1
Vrp1	0.0973415	-0.160339	0.144	0.151	1
capu	0.165314	-0.160465	0.238	0.234	1
chic	2.75749e-28	-0.161395	0.99	0.962	2.86558e-24
shep	6.34784e-12	-0.162437	0.922	0.866	6.59668e-08
Pak3	0.0566627	-0.162452	0.482	0.436	1
tx	0.0163695	-0.163414	0.106	0.118	1
pyr	3.60077e-19	-0.164081	0.021	0.066	3.74192e-15
pAbp	1.68892e-46	-0.16554	0.997	0.993	1.75512e-42
Gip	4.67027e-09	-0.165747	0.255	0.192	4.85335e-05
Adgf-A	0.0322244	-0.167893	0.414	0.393	1
Mob2	0.0648462	-0.171277	0.287	0.279	1
Fim	0.987663	-0.171308	0.503	0.428	1
CG30090	0.733429	-0.171645	0.208	0.201	1
Meltrin	0.167003	-0.171742	0.627	0.528	1
asRNA:CR46093	5.23226e-06	-0.172177	0.036	0.057	0.0543737
CG1572	9.34044e-08	-0.17322	0.71	0.666	0.000970658
28SrRNA-Psi:CR41609	0.186723	-0.17478	0.077	0.082	1
Su(dx)	8.18115e-05	-0.17512	0.175	0.199	0.850185
Ctr1A	0.000440929	-0.175154	0.25	0.203	1
Gdap2	0.000487886	-0.176303	0.12	0.14	1
Pde8	0.00208722	-0.176342	0.204	0.219	1
bif	0.00166161	-0.17658	0.498	0.464	1
CG44325	7.12452e-06	-0.178243	0.044	0.066	0.074038
CG11791	0.0691043	-0.178554	0.35	0.338	1
Irk1	0.000486852	-0.179366	0.234	0.257	1
Fer2LCH	4.26558e-06	-0.179431	0.863	0.801	0.0443279
lncRNA:CR44430	7.96135e-09	-0.180125	0.026	0.053	8.27344e-05
shot	0.0225193	-0.180279	0.412	0.348	1
CG33494	5.50741e-06	-0.180477	0.795	0.714	0.057233
Chmp1	0.29462	-0.181528	0.431	0.384	1
Gapdh2	0.761838	-0.181637	0.52	0.463	1
Idgf1	0.501558	-0.185022	0.428	0.385	1
lncRNA:CR42862	0.181436	-0.186769	0.431	0.394	1
Map205	0.00117663	-0.19007	0.48	0.448	1
mew	3.61303e-09	-0.190238	0.112	0.153	3.75466e-05
path	0.000844039	-0.190909	0.157	0.177	1
MRP	0.506766	-0.19434	0.32	0.299	1
chn	1.33334e-08	-0.195385	0.114	0.151	0.000138561
NK7.1	1.91299e-08	-0.195715	0.089	0.125	0.000198798
CG6701	0.00659294	-0.19588	0.334	0.33	1
CG7956	7.94543e-15	-0.195985	0.052	0.098	8.2569e-11
kay	0.000123288	-0.197487	0.452	0.454	1
CG43110	0.369778	-0.197714	0.164	0.162	1
CG45050	9.55584e-16	-0.19868	0.79	0.722	9.93043e-12
prage	1.1073e-09	-0.199003	0.124	0.166	1.15071e-05
CG43210	0.00434473	-0.200471	0.251	0.258	1
CG10126	2.03651e-11	-0.200837	0.055	0.095	2.11634e-07
Akap200	0.000131859	-0.202101	0.533	0.5	1
NijA	3.70768e-05	-0.203709	0.145	0.171	0.385302
Psc	0.0207538	-0.204173	0.28	0.282	1
mt:srRNA	3.5245e-07	-0.204201	0.648	0.61	0.00366266
pod1	0.0491236	-0.205048	0.284	0.281	1
RhoGAP71E	0.00656992	-0.205545	0.392	0.37	1
Ggamma30A	0.6227	-0.208043	0.489	0.428	1
CG31324	0.0129336	-0.208328	0.666	0.603	1
CG6006	0.00476707	-0.209137	0.145	0.16	1
CG13868	0.00301947	-0.210176	0.267	0.275	1
Swip-1	0.000272587	-0.210185	0.537	0.489	1
Rac2	5.51398e-08	-0.214399	0.723	0.635	0.000573012
rhea	0.0855167	-0.214522	0.405	0.374	1
CG10469	0.447193	-0.214726	0.097	0.089	1
CG11686	0.000914436	-0.215254	0.262	0.272	1
CG8177	0.000533073	-0.217758	0.352	0.346	1
Mmp2	9.89298e-11	-0.218582	0.057	0.095	1.02808e-06
spir	3.11078e-19	-0.21885	0.048	0.103	3.23273e-15
CG32066	0.000200533	-0.224887	0.281	0.29	1
Arc2	3.87724e-08	-0.22527	0.146	0.185	0.000402923
yellow-f	0.00207835	-0.225675	0.277	0.28	1
Thor	5.7148e-06	-0.226521	0.155	0.185	0.0593882
CAP	9.48081e-10	-0.22738	0.096	0.136	9.85246e-06
IP3K1	5.93816e-05	-0.227645	0.195	0.217	0.617094
GstE6	0.000390701	-0.231194	0.452	0.436	1
CG17760	0.000235593	-0.236164	0.236	0.251	1
CG42674	0.00025777	-0.236493	0.25	0.26	1
Gclc	8.96723e-07	-0.236645	0.189	0.219	0.00931875
cib	2.77037e-25	-0.23671	0.928	0.877	2.87897e-21
RapGAP1	0.038311	-0.237417	0.499	0.408	1
Gadd45	0.000530217	-0.238566	0.402	0.402	1
CG5953	2.08692e-13	-0.240013	0.142	0.196	2.16873e-09
Tsp42Ed	6.87186e-06	-0.245949	0.179	0.204	0.0714124
ZnT63C	1.47924e-08	-0.248252	0.232	0.264	0.000153722
RhoGAP18B	5.66315e-10	-0.252546	0.218	0.258	5.88515e-06
28SrRNA-Psi:CR45860	0.75681	-0.255255	0.126	0.122	1
CG16713	8.23691e-08	-0.25674	0.029	0.053	0.00085598
loco	3.09446e-07	-0.256745	0.272	0.293	0.00321577
GstD3	1.09632e-05	-0.267562	0.406	0.409	0.113929
CG2865	0.0100063	-0.275595	0.396	0.375	1
28SrRNA-Psi:CR45851	0.798882	-0.280832	0.322	0.299	1
Atox1	1.04079e-07	-0.282795	0.443	0.344	0.00108159
puc	5.70506e-08	-0.284049	0.29	0.315	0.00059287
AnxB9	5.10588e-13	-0.285347	0.829	0.737	5.30603e-09
Glut4EF	6.18145e-13	-0.290737	0.168	0.219	6.42377e-09
CG3348	0.000209019	-0.291589	0.164	0.189	1
CG6023	3.25822e-07	-0.292465	0.034	0.059	0.00338594
CG6891	4.11393e-14	-0.294537	0.41	0.441	4.2752e-10
Jra	2.42442e-09	-0.298988	0.389	0.407	2.51946e-05
Dro	0.00034605	-0.299012	0.047	0.064	1
28SrRNA-Psi:CR45855	5.82943e-14	-0.303298	0.111	0.165	6.05795e-10
pre-rRNA:CR45846	0.808607	-0.308841	0.372	0.357	1
CG7860	0.999821	-0.31071	0.06	0.059	1
Myo31DF	1.10367e-10	-0.31385	0.321	0.344	1.14693e-06
CG43236	0.109035	-0.314816	0.338	0.315	1
LamC	3.7747e-15	-0.31685	0.303	0.356	3.92267e-11
CG6770	0.000100763	-0.317379	0.261	0.278	1
trio	4.3555e-10	-0.317526	0.218	0.255	4.52624e-06
Nrt	1.18014e-18	-0.321572	0.087	0.148	1.2264e-14
Rel	2.44809e-09	-0.324356	0.378	0.394	2.54406e-05
pre-rRNA:CR45845	0.397187	-0.325897	0.567	0.511	1
Xrp1	3.26761e-38	-0.328004	0.714	0.699	3.3957e-34
pre-rRNA:CR45847	0.555176	-0.330859	0.375	0.362	1
CG8620	6.67294e-14	-0.33723	0.314	0.374	6.93452e-10
28SrRNA:CR45844	0.823802	-0.341786	0.329	0.309	1
CG13117	1.26314e-16	-0.345754	0.659	0.618	1.31265e-12
CG9932	0.000100845	-0.352025	0.339	0.333	1
28SrRNA-Psi:CR45848	0.43819	-0.353921	0.149	0.144	1
28SrRNA-Psi:CR40741	2.35137e-05	-0.359561	0.137	0.161	0.244354
mys	4.77738e-11	-0.361908	0.494	0.472	4.96465e-07
28SrRNA-Psi:CR40596	0.0773638	-0.363397	0.512	0.452	1
lncRNA:CR40469	1.82853e-10	-0.371106	0.359	0.385	1.90021e-06
Tep4	5.83309e-10	-0.398141	0.582	0.544	6.06175e-06
PPO3	8.5127e-11	-0.403539	0.026	0.056	8.84639e-07
CecB	3.77637e-16	-0.408949	0.041	0.087	3.9244e-12
28SrRNA:CR45837	0.00797909	-0.444525	0.188	0.196	1
pre-rRNA:CR45856	0.62918	-0.450246	0.355	0.325	1
Ance	0.201309	-0.47724	0.619	0.543	1
18SrRNA:CR41548	0.922069	-0.496658	0.292	0.273	1
fax	9.55093e-09	-0.497455	0.353	0.363	9.92532e-05
28SrRNA-Psi:CR45859	2.26331e-22	-0.503117	0.281	0.346	2.35203e-18
18SrRNA:CR45838	0.584347	-0.510807	0.285	0.271	1
IM18	1.47372e-14	-0.511039	0.045	0.088	1.53149e-10
18SrRNA:CR45841	0.548491	-0.513582	0.28	0.267	1
18SrRNA-Psi:CR45861	0.125207	-0.522075	0.224	0.223	1
CG43175	4.52984e-09	-0.531143	0.22	0.255	4.70741e-05
CG5399	6.15464e-16	-0.5387	0.242	0.304	6.3959e-12
CecA1	4.79107e-24	-0.545063	0.041	0.102	4.97887e-20
CG15784	1.83459e-06	-0.547875	0.147	0.176	0.019065
18SrRNA-Psi:CR41602	3.98768e-20	-0.559702	0.404	0.458	4.14399e-16
Drs	1.23208e-12	-0.611525	0.158	0.214	1.28038e-08
Arc1	6.95517e-40	-0.639679	0.514	0.559	7.22781e-36
Men	3.06611e-14	-0.655993	0.479	0.484	3.1863e-10
CG33225	5.27862e-29	-0.680114	0.137	0.224	5.48554e-25
CG15347	0.000524945	-0.700792	0.225	0.242	1
alphaTub85E	3.1657e-05	-0.765507	0.227	0.246	0.32898
Mmp1	2.46832e-27	-0.776109	0.249	0.322	2.56508e-23
CecA2	7.77044e-23	-0.782911	0.064	0.129	8.07504e-19
CG10467	0.000131896	-0.817584	0.13	0.101	1
Mtk	0.00130354	-0.849682	0.263	0.272	1
atilla	1.29177e-11	-0.87675	0.043	0.079	1.34241e-07
CG14610	3.77498e-06	-0.879249	0.031	0.051	0.0392296
CecC	4.94938e-35	-0.963775	0.118	0.213	5.1434e-31
betaTub60D	3.09015e-14	-1.05763	0.048	0.092	3.21128e-10
MtnA	0.0200648	-1.08356	0.336	0.283	1
fok	0.758835	-1.15411	0.107	0.1	1
PPO1	0.00278341	-1.70225	0.256	0.208	1
PPO2	1.48361e-09	-1.83295	0.364	0.27	1.54177e-05

## Sheet: PM3
gene	cluster4.p_val	cluster4.avg_logFC	cluster4.pct.1	cluster4.pct.2	cluster4.p_val_adj
Mmp1	6.66858e-171	1.17058	0.54	0.289	6.92999e-167
CG16713	7.95835e-170	0.955596	0.183	0.036	8.27032e-166
CG5399	1.78669e-110	0.950738	0.493	0.276	1.85673e-106
Nrt	2.28291e-212	0.86311	0.366	0.117	2.3724e-208
CG43236	2.43152e-233	0.834576	0.623	0.287	2.52683e-229
CG42807	4.17113e-186	0.815988	0.823	0.547	4.33464e-182
trio	9.68617e-192	0.815635	0.496	0.225	1.00659e-187
CecB	6.83453e-80	0.800007	0.193	0.07	7.10244e-76
Mtk	2.51076e-31	0.773485	0.367	0.261	2.60918e-27
CecC	9.64236e-109	0.757215	0.391	0.181	1.00203e-104
Drs	1.04529e-67	0.733881	0.359	0.191	1.08627e-63
Glut4EF	4.47235e-163	0.660309	0.442	0.189	4.64767e-159
Rel	1.00601e-116	0.654847	0.592	0.371	1.04544e-112
NijA	3.53288e-142	0.637914	0.368	0.147	3.67137e-138
CG9932	1.50243e-90	0.590326	0.513	0.316	1.56133e-86
CecA1	3.51085e-49	0.589374	0.189	0.085	3.64848e-45
CG42674	7.59594e-119	0.566032	0.461	0.238	7.8937e-115
chn	1.03135e-148	0.559331	0.344	0.126	1.07178e-144
CG6006	1.94143e-58	0.554397	0.28	0.145	2.01753e-54
Gadd45	6.19893e-85	0.552191	0.59	0.383	6.44193e-81
NimC1	6.97218e-125	0.549806	0.433	0.2	7.24549e-121
asRNA:CR46093	1.53814e-96	0.537808	0.159	0.044	1.59843e-92
CG2065	3.40077e-107	0.533507	0.253	0.091	3.53408e-103
IP3K1	2.19734e-72	0.516661	0.367	0.199	2.28347e-68
dpr17	1.6846e-61	0.506149	0.222	0.099	1.75064e-57
cact	8.18463e-75	0.498616	0.419	0.243	8.50546e-71
Idgf1	3.03921e-102	0.497033	0.614	0.368	3.15835e-98
lncRNA:CR42715	1.56946e-288	0.495405	0.218	0.03	1.63098e-284
kay	1.09282e-45	0.491118	0.567	0.442	1.13566e-41
CG2444	5.58225e-71	0.46785	0.278	0.129	5.80108e-67
spir	2.21936e-122	0.462696	0.247	0.08	2.30636e-118
CecA2	3.12219e-29	0.43837	0.201	0.112	3.24458e-25
E(spl)mbeta-HLH	1.28481e-64	0.437545	0.42	0.248	1.33518e-60
Chmp1	6.79648e-53	0.417537	0.524	0.377	7.06291e-49
AnxB9	1.2856e-91	0.41417	0.87	0.736	1.336e-87
CG14322	1.06957e-88	0.411908	0.206	0.072	1.11149e-84
CG43210	1.37309e-58	0.407433	0.403	0.242	1.42691e-54
capu	1.47102e-85	0.388735	0.413	0.217	1.52868e-81
CG12290	4.74318e-82	0.385118	0.289	0.125	4.92912e-78
CG6701	1.77328e-63	0.374068	0.496	0.313	1.84279e-59
vari	1.12111e-66	0.371282	0.358	0.196	1.16506e-62
CG11686	1.09808e-76	0.36928	0.452	0.252	1.14112e-72
Reg-5	6.80454e-60	0.367635	0.299	0.154	7.07128e-56
AttD	1.847e-48	0.364668	0.082	0.023	1.9194e-44
PGRP-SA	3.50868e-64	0.361847	0.2	0.081	3.64622e-60
CG6891	2.69358e-75	0.359031	0.631	0.417	2.79917e-71
yellow-f	5.15195e-71	0.352425	0.463	0.261	5.35391e-67
shrb	3.24616e-40	0.351472	0.548	0.427	3.37341e-36
CG11791	3.34061e-44	0.345426	0.465	0.326	3.47156e-40
Keap1	3.50971e-65	0.344563	0.217	0.093	3.64729e-61
AttB	1.60458e-28	0.342554	0.081	0.031	1.66748e-24
CG2865	1.56245e-47	0.341889	0.515	0.364	1.62369e-43
Myo31DF	1.24901e-70	0.339435	0.519	0.323	1.29797e-66
CG30090	1.14621e-37	0.339367	0.315	0.191	1.19114e-33
RhoGAP71E	1.65287e-53	0.338726	0.52	0.358	1.71766e-49
CG17760	7.96875e-58	0.336132	0.402	0.233	8.28113e-54
loco	8.35383e-59	0.330131	0.45	0.274	8.6813e-55
CG13482	3.92698e-61	0.330081	0.084	0.02	4.08092e-57
CG8177	1.37275e-41	0.327959	0.473	0.334	1.42657e-37
CG31324	8.75692e-49	0.319318	0.757	0.596	9.1002e-45
Alh	1.73197e-53	0.318664	0.308	0.167	1.79986e-49
edl	3.50927e-78	0.315241	0.252	0.103	3.64684e-74
rgn	2.29649e-34	0.314385	0.233	0.133	2.38651e-30
pst	1.27493e-45	0.311427	0.468	0.319	1.32491e-41
Rap2l	3.61553e-54	0.311368	0.364	0.211	3.75726e-50
Mob2	1.07096e-51	0.310369	0.423	0.266	1.11294e-47
Gclc	2.54552e-42	0.308509	0.335	0.203	2.6453e-38
l(2)gl	7.58827e-52	0.30759	0.439	0.279	7.88573e-48
Swip-1	1.38556e-50	0.303936	0.636	0.481	1.43987e-46
ZnT63C	1.9358e-48	0.302364	0.395	0.246	2.01168e-44
Thor	9.81542e-40	0.295937	0.294	0.17	1.02002e-35
CG18659	7.41793e-46	0.293112	0.294	0.166	7.70872e-42
CG5346	7.96091e-36	0.28886	0.362	0.239	8.27297e-32
CG10527	8.45013e-39	0.288159	0.635	0.513	8.78137e-35
lncRNA:CR40469	3.15167e-33	0.286948	0.49	0.371	3.27522e-29
tacc	1.21198e-37	0.284095	0.427	0.293	1.25948e-33
sea	1.68977e-26	0.281987	0.429	0.319	1.756e-22
RhoL	8.09293e-29	0.2813	0.43	0.316	8.41018e-25
spin	7.70332e-42	0.279733	0.501	0.353	8.00529e-38
Idgf6	2.02585e-80	0.279125	0.986	0.932	2.10526e-76
spict	1.09019e-47	0.277213	0.365	0.219	1.13293e-43
SppL	4.629e-47	0.276678	0.277	0.148	4.81046e-43
CG43175	2.10322e-30	0.274818	0.358	0.239	2.18567e-26
Xrp1	2.39766e-49	0.271971	0.805	0.69	2.49165e-45
zfh1	3.595e-48	0.27093	0.855	0.754	3.73592e-44
Gprk2	4.85766e-43	0.270004	0.351	0.212	5.04808e-39
lqf	4.10181e-36	0.268593	0.537	0.408	4.2626e-32
Dronc	1.00039e-57	0.267628	0.282	0.139	1.0396e-53
Tep1	7.22418e-34	0.265656	0.52	0.374	7.50737e-30
CHMP2B	2.14311e-38	0.264287	0.298	0.178	2.22712e-34
CG1572	1.33269e-42	0.262852	0.788	0.66	1.38493e-38
CG7523	2.30008e-37	0.260013	0.362	0.233	2.39025e-33
bun	1.63259e-43	0.259984	0.794	0.682	1.69659e-39
Pak3	3.76135e-39	0.257673	0.572	0.429	3.90879e-35
rost	3.2881e-41	0.256877	0.339	0.203	3.417e-37
Jra	1.41296e-28	0.254728	0.52	0.392	1.46835e-24
drongo	1.55424e-37	0.25284	0.342	0.215	1.61516e-33
Diap1	1.6401e-39	0.252492	0.426	0.279	1.70439e-35
prage	3.68219e-40	0.252036	0.27	0.149	3.82653e-36
CG13117	5.34049e-62	0.251773	0.786	0.607	5.54983e-58
RasGAP1	1.41143e-53	0.250179	0.227	0.106	1.46676e-49
Su(dx)	1.03268e-45	0.250144	0.322	0.183	1.07316e-41
mtgo	2.17836e-39	0.249605	0.571	0.413	2.26376e-35
Idgf2	1.23069e-33	0.249359	0.814	0.674	1.27893e-29
Spn55B	2.14796e-33	0.247777	0.292	0.178	2.23216e-29
GILT1	2.10667e-57	0.247127	0.241	0.111	2.18925e-53
l(3)05822	5.73033e-41	0.24499	0.457	0.303	5.95496e-37
kek1	6.77566e-39	0.243744	0.284	0.16	7.04126e-35
olf186-M	7.18482e-37	0.242548	0.607	0.451	7.46646e-33
Csk	7.17758e-34	0.242016	0.292	0.177	7.45894e-30
CG17574	4.61159e-39	0.240997	0.759	0.619	4.79236e-35
Spn42Da	1.14818e-43	0.239846	0.278	0.153	1.19319e-39
Oat	5.37153e-45	0.239479	0.324	0.183	5.5821e-41
Dro	0.00108796	0.238835	0.079	0.06	1
pyr	2.31227e-47	0.238565	0.136	0.052	2.40291e-43
RhoGAP16F	3.58322e-33	0.238241	0.494	0.355	3.72368e-29
RhoGEF3	7.22859e-43	0.235785	0.303	0.172	7.51195e-39
bdg	1.07393e-65	0.235459	0.189	0.072	1.11603e-61
CG13116	4.15997e-82	0.234716	0.113	0.027	4.32304e-78
Vrp1	2.0172e-49	0.233398	0.269	0.138	2.09627e-45
CG9372	1.49545e-47	0.233378	0.746	0.546	1.55407e-43
drk	1.56061e-31	0.232301	0.477	0.346	1.62178e-27
PGRP-LF	6.1064e-36	0.230599	0.294	0.173	6.34577e-32
CG5953	2.12701e-31	0.230274	0.292	0.178	2.21038e-27
NimB1	7.69432e-23	0.228519	0.407	0.307	7.99594e-19
PGRP-LD	2.96329e-47	0.227254	0.227	0.111	3.07945e-43
oys	1.25055e-46	0.226849	0.269	0.139	1.29957e-42
rush	2.62705e-29	0.226565	0.499	0.37	2.73003e-25
Idgf3	2.83466e-38	0.22611	0.799	0.674	2.94578e-34
aqz	6.83908e-37	0.22515	0.93	0.868	7.10717e-33
Pde8	5.40474e-39	0.224823	0.339	0.204	5.61661e-35
Vps2	3.06061e-33	0.224446	0.42	0.288	3.18058e-29
l(1)G0289	1.16151e-40	0.223438	0.73	0.541	1.20704e-36
CG15098	7.60354e-58	0.222722	0.941	0.861	7.90159e-54
ena	9.79962e-41	0.222244	0.499	0.329	1.01838e-36
fax	1.04734e-14	0.221581	0.438	0.354	1.0884e-10
pigs	4.95053e-38	0.22075	0.348	0.211	5.14459e-34
Psc	6.00795e-23	0.21842	0.378	0.272	6.24347e-19
Doa	4.00852e-36	0.218243	0.325	0.2	4.16565e-32
Rip11	1.18887e-32	0.212944	0.657	0.506	1.23548e-28
Map205	1.49133e-30	0.21269	0.575	0.44	1.54979e-26
Ggamma30A	8.90265e-36	0.212516	0.576	0.421	9.25164e-32
lncRNA:CR42862	2.74138e-24	0.212213	0.501	0.388	2.84884e-20
MP1	9.69643e-30	0.211544	0.328	0.209	1.00765e-25
CG8620	2.28348e-20	0.211296	0.467	0.356	2.37299e-16
Irk1	2.01097e-18	0.210506	0.341	0.245	2.0898e-14
CG10103	1.09783e-29	0.210251	0.336	0.221	1.14087e-25
Zip99C	1.37181e-31	0.210248	0.213	0.118	1.42558e-27
wun	1.23522e-38	0.208664	0.201	0.101	1.28364e-34
CG10376	4.09758e-26	0.207928	0.294	0.191	4.25821e-22
CG34436	8.42998e-70	0.206513	0.156	0.051	8.76043e-66
SCaMC	6.79962e-30	0.206487	0.593	0.461	7.06617e-26
mbc	6.51367e-28	0.205703	0.404	0.284	6.76901e-24
l(3)L1231	1.16578e-30	0.205658	0.419	0.284	1.21148e-26
Tsp42Ee	3.02547e-28	0.204585	0.766	0.624	3.14407e-24
gish	1.22214e-26	0.20448	0.475	0.352	1.27005e-22
CG31523	3.25822e-30	0.203336	0.329	0.212	3.38594e-26
rogdi	5.81945e-35	0.201828	0.251	0.141	6.04758e-31
Cys	3.8259e-23	0.2013	0.62	0.493	3.97587e-19
svr	3.91917e-27	0.200462	0.581	0.438	4.07281e-23
CG10098	1.5249e-36	0.198975	0.259	0.144	1.58468e-32
RpL9	2.86122e-20	0.197584	0.932	0.915	2.97338e-16
pirk	5.69759e-25	0.195359	0.313	0.204	5.92093e-21
Npc2a	2.39914e-33	0.195346	0.778	0.636	2.49318e-29
RpS14b	5.32859e-24	0.194601	0.78	0.715	5.53748e-20
CG1146	2.04761e-55	0.1938	0.155	0.058	2.12788e-51
CG12112	2.24543e-24	0.193463	0.309	0.206	2.33345e-20
SH3PX1	1.46865e-33	0.192096	0.322	0.199	1.52622e-29
Spn27A	6.80367e-24	0.191527	0.642	0.519	7.07038e-20
Hip1	9.39804e-28	0.190903	0.228	0.134	9.76645e-24
Cortactin	2.96049e-29	0.190357	0.482	0.347	3.07655e-25
Gel	1.44026e-32	0.189552	0.737	0.613	1.49672e-28
Prip	2.10216e-34	0.188719	0.88	0.793	2.18457e-30
Rabex-5	8.25354e-34	0.187863	0.306	0.183	8.57708e-30
CG42711	3.082e-28	0.187837	0.613	0.449	3.20281e-24
Paip2	1.00945e-20	0.186843	0.312	0.217	1.04902e-16
regucalcin	1.00706e-47	0.18625	0.997	0.96	1.04653e-43
CG8300	4.99027e-25	0.186117	0.333	0.226	5.18588e-21
cindr	1.50186e-28	0.185144	0.681	0.543	1.56073e-24
olf186-F	2.57745e-28	0.18514	0.294	0.185	2.67849e-24
rho	4.51444e-36	0.184666	0.085	0.029	4.6914e-32
teq	5.24534e-13	0.183648	0.08	0.043	5.45096e-09
CG5446	1.53709e-23	0.183498	0.461	0.344	1.59734e-19
CG3328	2.0922e-23	0.183491	0.339	0.23	2.17421e-19
Rab8	2.8784e-26	0.183311	0.451	0.326	2.99123e-22
CtsB1	4.77353e-23	0.183081	0.799	0.692	4.96065e-19
Past1	1.62361e-27	0.182645	0.605	0.47	1.68725e-23
CG14995	3.57157e-38	0.182523	0.166	0.076	3.71158e-34
His4r	1.02995e-21	0.182483	0.772	0.69	1.07032e-17
Pdk1	8.09017e-25	0.182023	0.307	0.201	8.40731e-21
AttA	1.03655e-24	0.181973	0.056	0.019	1.07718e-20
ATP8B	1.56211e-28	0.181574	0.7	0.562	1.62335e-24
Lis-1	2.64578e-21	0.181273	0.343	0.245	2.7495e-17
Spn88Ea	1.59658e-25	0.180199	0.265	0.165	1.65916e-21
emc	7.94611e-20	0.179943	0.474	0.364	8.2576e-16
Mec2	3.279e-26	0.17891	0.36	0.242	3.40753e-22
Rho1	2.92404e-37	0.178097	0.884	0.795	3.03867e-33
Atf3	2.42417e-27	0.17797	0.29	0.181	2.5192e-23
capt	1.69892e-27	0.1777	0.703	0.577	1.76551e-23
CG9436	1.69254e-18	0.177052	0.246	0.164	1.75888e-14
RpL15	1.43813e-48	0.176287	0.997	0.992	1.4945e-44
Best1	7.16837e-30	0.174847	0.252	0.149	7.44937e-26
Akap200	1.68649e-27	0.17461	0.633	0.491	1.7526e-23
cathD	2.03831e-21	0.174375	0.798	0.68	2.11821e-17
Abl	0.157124	0.173293	0.466	0.46	1
RpL30	3.06879e-26	0.172183	0.959	0.928	3.18909e-22
cer	1.98443e-29	0.171868	0.694	0.544	2.06221e-25
viaf	1.15914e-21	0.171715	0.41	0.302	1.20458e-17
shi	6.34157e-21	0.171404	0.505	0.39	6.59016e-17
CG10383	1.62178e-19	0.171389	0.152	0.088	1.68535e-15
vsg	1.35355e-15	0.169992	0.95	0.897	1.40661e-11
ome	2.57914e-31	0.169364	0.214	0.117	2.68025e-27
Galphai	4.1121e-21	0.169196	0.448	0.336	4.27329e-17
CG13907	1.21811e-15	0.168159	0.22	0.149	1.26586e-11
CG6115	2.21533e-20	0.167926	0.476	0.367	2.30217e-16
mamo	5.47904e-24	0.167655	0.577	0.448	5.69382e-20
Snoo	0.0210282	0.167419	0.429	0.407	1
cnc	7.90295e-19	0.165856	0.518	0.413	8.21274e-15
wnd	2.5309e-23	0.165781	0.246	0.156	2.63011e-19
LRR	5.31389e-34	0.165586	0.233	0.128	5.52219e-30
CG4250	7.20584e-26	0.164629	0.892	0.782	7.48831e-22
CG30456	8.8192e-33	0.164521	0.213	0.113	9.16491e-29
CG2201	1.49784e-41	0.163089	0.122	0.047	1.55656e-37
Syx1A	1.50529e-18	0.162358	0.521	0.417	1.5643e-14
Rac2	2.06831e-30	0.161969	0.754	0.636	2.14939e-26
stck	3.74197e-22	0.161929	0.312	0.211	3.88865e-18
CG14253	5.50192e-19	0.160143	0.585	0.476	5.7176e-15
MICAL-like	3.96512e-27	0.159561	0.237	0.142	4.12055e-23
ghi	1.109e-18	0.159425	0.41	0.306	1.15247e-14
Vps60	1.89538e-20	0.159373	0.414	0.305	1.96968e-16
Myd88	6.52974e-21	0.159072	0.288	0.194	6.78571e-17
CG1890	5.60325e-17	0.158977	0.627	0.535	5.8229e-13
CG2493	6.09988e-22	0.158241	0.593	0.472	6.33899e-18
Baldspot	6.46104e-20	0.158203	0.612	0.489	6.71431e-16
FER	4.23318e-27	0.157641	0.233	0.137	4.39912e-23
mmy	5.21025e-19	0.157548	0.507	0.391	5.41449e-15
Tm1	7.40665e-21	0.157306	0.57	0.45	7.69699e-17
sgg	7.37129e-16	0.157188	0.554	0.463	7.66025e-12
Lnk	3.7746e-20	0.154739	0.206	0.128	3.92257e-16
Atg8a	5.77838e-16	0.15411	0.631	0.547	6.00489e-12
NimB4	1.79065e-26	0.153383	0.767	0.618	1.86084e-22
Fim	8.00071e-23	0.152902	0.554	0.426	8.31434e-19
Pdcd4	1.05133e-16	0.152523	0.561	0.459	1.09254e-12
mew	1.94152e-19	0.152485	0.22	0.14	2.01763e-15
Mmp2	4.32433e-24	0.151349	0.156	0.083	4.49385e-20
mib2	1.50946e-15	0.151064	0.267	0.188	1.56863e-11
CG31673	4.61711e-19	0.150901	0.382	0.275	4.7981e-15
CG5004	5.03531e-18	0.150424	0.28	0.193	5.23269e-14
Snx1	2.9051e-17	0.150173	0.461	0.358	3.01898e-13
Hex-A	0.00712993	-0.15012	0.21	0.231	1
ND-B16.6	4.79713e-06	-0.150358	0.428	0.457	0.0498518
CG13364	0.000170974	-0.150371	0.491	0.491	1
SERCA	2.65988e-07	-0.150584	0.205	0.262	0.00276414
mge	1.36226e-05	-0.151516	0.248	0.287	0.141566
eIF2alpha	4.20422e-06	-0.151617	0.26	0.311	0.0436903
asRNA:CR44095	6.18183e-05	-0.151665	0.108	0.14	0.642416
Fkbp12	3.84433e-06	-0.152453	0.38	0.427	0.0399503
ATPsynCF6	1.63037e-08	-0.152789	0.34	0.405	0.000169428
ScsbetaA	5.45835e-07	-0.15298	0.201	0.255	0.00567231
GlyRS	2.72264e-06	-0.154064	0.152	0.198	0.0282936
agt	9.55045e-07	-0.154105	0.177	0.226	0.00992483
Spp	0.000152841	-0.154734	0.454	0.473	1
eEF2	4.17288e-11	-0.154911	0.582	0.671	4.33646e-07
eIF4E1	5.28544e-07	-0.15521	0.276	0.335	0.00549263
Ctr1A	0.636855	-0.15663	0.21	0.209	1
CG10576	1.72472e-07	-0.157125	0.578	0.592	0.00179232
GstD9	2.11008e-05	-0.158819	0.126	0.162	0.21928
mt:lrRNA	2.8155e-11	-0.15928	1	1	2.92587e-07
28SrRNA-Psi:CR41609	0.00114935	-0.159382	0.062	0.083	1
Prosbeta4	1.48007e-07	-0.159823	0.529	0.551	0.00153809
CG42322	7.20349e-05	-0.159919	0.128	0.163	0.748587
lncRNA:CR44430	5.95688e-06	-0.160007	0.028	0.051	0.0619039
eIF3j	1.86508e-07	-0.160074	0.195	0.249	0.00193819
CG43179	5.14488e-16	-0.160293	0.017	0.064	5.34655e-12
DppIII	4.91686e-06	-0.161134	0.257	0.3	0.051096
TRAM	5.55366e-05	-0.161477	0.382	0.412	0.577137
Lst	1.08395e-10	-0.162592	0.019	0.054	1.12644e-06
SmF	7.74241e-05	-0.162687	0.316	0.342	0.804591
bru3	0.000703754	-0.163369	0.101	0.127	1
sip2	4.01057e-11	-0.163769	0.067	0.118	4.16778e-07
Pfdn2	1.12475e-09	-0.165247	0.162	0.225	1.16885e-05
PCNA	6.99657e-06	-0.165795	0.235	0.278	0.0727084
Ran	2.53608e-17	-0.166479	0.845	0.842	2.6355e-13
SerRS	1.2263e-06	-0.166531	0.318	0.359	0.0127437
Tom40	2.61028e-05	-0.166673	0.315	0.346	0.271261
CG18547	3.92144e-09	-0.167052	0.056	0.097	4.07516e-05
UQCR-6.4	1.62811e-06	-0.168302	0.449	0.472	0.0169193
Phb2	0.000105197	-0.169006	0.334	0.355	1
UQCR-11	2.22706e-08	-0.169442	0.317	0.378	0.000231436
vig2	7.66156e-09	-0.170449	0.719	0.706	7.9619e-05
SmB	1.83561e-06	-0.17049	0.331	0.369	0.0190757
Prosbeta3	1.34754e-06	-0.171401	0.506	0.522	0.0140036
mud	1.11882e-07	-0.171783	0.086	0.126	0.00116267
Cyt-c1	0.00191194	-0.171867	0.427	0.426	1
CG10469	0.128039	-0.172475	0.081	0.091	1
Hsc70-4	5.33039e-22	-0.1745	0.933	0.92	5.53934e-18
CAP	0.0690865	-0.17453	0.123	0.132	1
eRF3	1.75209e-08	-0.175518	0.192	0.251	0.000182077
CG4951	3.84142e-05	-0.177187	0.137	0.171	0.3992
Sec61gamma	1.1854e-06	-0.178022	0.491	0.51	0.0123187
mnd	1.90104e-05	-0.178805	0.289	0.324	0.197556
CCT5	6.27938e-10	-0.180467	0.308	0.376	6.52553e-06
sle	2.8678e-05	-0.181418	0.307	0.34	0.298022
asRNA:CR45264	3.61722e-07	-0.182857	0.095	0.136	0.00375901
CG7637	9.39433e-06	-0.183931	0.281	0.317	0.0976259
mod	0.000224133	-0.185617	0.492	0.489	1
hebe	7.22685e-08	-0.187222	0.066	0.104	0.000751015
CG10638	5.11625e-08	-0.187431	0.273	0.325	0.00053168
CG5828	2.14118e-06	-0.187765	0.033	0.06	0.0222512
BI-1	0.00560342	-0.188528	0.339	0.354	1
CycB	1.10988e-06	-0.188569	0.13	0.172	0.0115339
smt3	1.38361e-11	-0.189434	0.827	0.823	1.43785e-07
Hsp68	3.85215e-06	-0.189548	0.177	0.223	0.0400316
eEF5	4.43963e-15	-0.190162	0.588	0.677	4.61366e-11
CCT3	1.07686e-08	-0.190302	0.307	0.367	0.000111907
Ttc19	2.54671e-10	-0.19106	0.067	0.116	2.64654e-06
Myc	5.83041e-10	-0.193589	0.273	0.344	6.05896e-06
CG17841	2.82284e-05	-0.193681	0.169	0.202	0.29335
wech	1.31624e-05	-0.193987	0.214	0.254	0.136784
eEF1delta	3.18988e-11	-0.197118	0.602	0.617	3.31493e-07
Naxd	0.0357905	-0.199132	0.185	0.199	1
CG30382	1.26767e-09	-0.199323	0.099	0.151	1.31736e-05
Prosalpha1	9.80088e-10	-0.199962	0.099	0.151	1.01851e-05
feo	2.83173e-12	-0.201872	0.082	0.14	2.94274e-08
tna	0.000141573	-0.204165	0.127	0.158	1
Atox1	0.00188998	-0.206778	0.409	0.351	1
scyl	1.63289e-10	-0.207218	0.419	0.483	1.6969e-06
eIF2beta	3.28532e-12	-0.209297	0.259	0.337	3.4141e-08
CG9922	1.1832e-05	-0.210261	0.299	0.327	0.122958
P32	2.07156e-08	-0.211578	0.283	0.33	0.000215276
CCT1	4.17255e-12	-0.212298	0.231	0.306	4.33611e-08
Lip4	9.37123e-11	-0.213267	0.049	0.093	9.73858e-07
Ssrp	1.37155e-06	-0.224384	0.304	0.339	0.0142531
CG13096	1.61481e-09	-0.226924	0.224	0.275	1.67811e-05
HmgZ	4.75793e-11	-0.228846	0.737	0.737	4.94445e-07
hoip	3.99131e-09	-0.233317	0.354	0.398	4.14777e-05
CG7860	0.25941	-0.235891	0.065	0.058	1
eIF6	8.15359e-13	-0.23984	0.161	0.227	8.47321e-09
ham	1.53418e-10	-0.240186	0.191	0.251	1.59432e-06
Hsp83	2.00154e-28	-0.241345	0.867	0.89	2.08e-24
Nph	2.31296e-07	-0.244427	0.45	0.475	0.00240362
Jafrac1	2.86167e-16	-0.244887	0.708	0.717	2.97384e-12
Pen	1.488e-08	-0.247007	0.467	0.494	0.000154633
CG43110	7.0105e-08	-0.248429	0.119	0.167	0.000728532
28SrRNA-Psi:CR40741	0.00284471	-0.248466	0.137	0.16	1
Nop60B	4.22929e-11	-0.249277	0.396	0.441	4.39507e-07
CG31219	5.21598e-10	-0.251172	0.1	0.15	5.42045e-06
CG10602	1.00882e-06	-0.253937	0.237	0.281	0.0104836
Nop56	6.93326e-13	-0.254193	0.348	0.408	7.20505e-09
GstE6	2.78278e-07	-0.258998	0.418	0.44	0.00289187
Hsp60A	2.01668e-16	-0.261054	0.275	0.369	2.09574e-12
stg	1.94164e-09	-0.263531	0.351	0.404	2.01776e-05
N	0.00224205	-0.264947	0.384	0.383	1
NHP2	9.37029e-11	-0.267177	0.257	0.311	9.7376e-07
CG6023	0.000241718	-0.267279	0.038	0.057	1
trol	6.95634e-07	-0.268312	0.402	0.441	0.00722903
CG11267	2.42316e-19	-0.269851	0.613	0.638	2.51815e-15
Fkbp39	1.69626e-16	-0.271395	0.207	0.297	1.76276e-12
polo	8.2426e-13	-0.273247	0.145	0.211	8.56571e-09
Gapdh2	0.0020837	-0.273675	0.485	0.469	1
CG12133	2.7575e-15	-0.274079	0.025	0.074	2.8656e-11
scra	2.38388e-13	-0.278033	0.15	0.219	2.47733e-09
CG6191	1.4632e-06	-0.302365	0.34	0.377	0.0152056
28SrRNA-Psi:CR45860	3.19874e-08	-0.3258	0.084	0.127	0.000332413
Fkbp59	1.53401e-07	-0.334946	0.148	0.195	0.00159414
fmt	9.20212e-15	-0.342749	0.545	0.602	9.56284e-11
alphaTub85E	3.94684e-10	-0.347136	0.312	0.236	4.10155e-06
CG1648	0.0395824	-0.348454	0.216	0.218	1
lncRNA:CR43855	0.00027473	-0.348625	0.565	0.579	1
CG42566	4.11797e-09	-0.374868	0.583	0.579	4.2794e-05
28SrRNA-Psi:CR40596	9.0757e-22	-0.382164	0.355	0.47	9.43146e-18
PPO3	2.57312e-09	-0.387021	0.023	0.055	2.67399e-05
Ald1	2.21363e-16	-0.388886	0.364	0.445	2.30041e-12
mthl4	1.34512e-14	-0.396621	0.094	0.158	1.39785e-10
18SrRNA-Psi:CR41602	0.00186373	-0.418515	0.448	0.451	1
28SrRNA-Psi:CR45848	8.43523e-15	-0.449963	0.086	0.151	8.76589e-11
IM18	2.24127e-14	-0.540634	0.037	0.087	2.32913e-10
28SrRNA:CR45837	3.02022e-17	-0.549069	0.124	0.202	3.13861e-13
28SrRNA-Psi:CR45851	1.54364e-15	-0.552102	0.234	0.309	1.60415e-11
Ance	0.0297391	-0.555138	0.585	0.549	1
pre-rRNA:CR45845	3.52977e-14	-0.58771	0.466	0.523	3.66814e-10
lncRNA:CR44316	6.26031e-14	-0.588646	0.083	0.141	6.50571e-10
28SrRNA:CR45844	5.75985e-16	-0.606539	0.244	0.319	5.98564e-12
CG15784	6.73287e-07	-0.612375	0.137	0.176	0.0069968
pre-rRNA:CR45846	3.02482e-12	-0.630246	0.307	0.364	3.1434e-08
CG15347	1.45996e-05	-0.638626	0.21	0.243	0.151719
pre-rRNA:CR45847	1.9361e-12	-0.654007	0.315	0.369	2.01199e-08
CG10467	0.0418217	-0.760822	0.121	0.103	1
pre-rRNA:CR45856	4.40542e-18	-0.774297	0.254	0.336	4.57811e-14
18SrRNA:CR41548	6.11331e-20	-0.793871	0.195	0.283	6.35295e-16
18SrRNA:CR45838	3.01433e-19	-0.799555	0.195	0.28	3.13249e-15
18SrRNA:CR45841	7.32388e-20	-0.803234	0.189	0.276	7.61098e-16
18SrRNA-Psi:CR45861	5.02677e-24	-0.820605	0.135	0.232	5.22382e-20
atilla	1.29609e-08	-0.85767	0.043	0.078	0.00013469
CG14610	2.43543e-16	-0.955453	0.009	0.053	2.53089e-12
betaTub60D	0.035409	-0.971837	0.075	0.087	1
fok	0.00074061	-1.14209	0.079	0.103	1
MtnA	2.7111e-12	-1.24619	0.233	0.296	2.81737e-08
PPO1	0.00597897	-1.80938	0.193	0.216	1
PPO2	0.328178	-1.87889	0.282	0.282	1

## Sheet: PM4
gene	cluster5.p_val	cluster5.avg_logFC	cluster5.pct.1	cluster5.pct.2	cluster5.p_val_adj
Ance	1.12125e-121	1.01866	0.745	0.537	1.16521e-117
IM18	4.7582e-159	0.915171	0.266	0.068	4.94472e-155
CG42566	7.62789e-136	0.841156	0.779	0.564	7.9269e-132
Tep4	7.95796e-72	0.662001	0.679	0.538	8.26991e-68
lncRNA:CR43855	2.25225e-35	0.495844	0.671	0.57	2.34053e-31
Lst	1.35382e-83	0.485944	0.156	0.042	1.40689e-79
Lip4	1.71719e-74	0.485685	0.215	0.079	1.7845e-70
Hsp27	4.3773e-36	0.358008	0.482	0.334	4.54889e-32
Hsp26	2.88541e-21	0.355008	0.499	0.405	2.99852e-17
mthl6	1.43361e-23	0.353419	0.277	0.182	1.48981e-19
Dyak-FK506-bp2	7.38119e-31	0.324464	0.522	0.379	7.67053e-27
CG6023	1.30498e-58	0.322447	0.147	0.048	1.35614e-54
Nph	4.63221e-27	0.32197	0.564	0.465	4.81379e-23
Hsp70Bc	2.53906e-17	0.31635	0.313	0.227	2.63859e-13
ham	2.0588e-20	0.302921	0.33	0.239	2.13951e-16
NHP2	3.24506e-24	0.297077	0.403	0.298	3.37227e-20
GstO3	2.2415e-17	0.291386	0.601	0.544	2.32936e-13
CG13160	1.64027e-103	0.283735	0.131	0.026	1.70457e-99
sesB	1.02264e-22	0.276276	0.939	0.877	1.06273e-18
awd	2.29576e-49	0.263829	0.988	0.942	2.38575e-45
Nop60B	3.96802e-25	0.258969	0.54	0.428	4.12356e-21
CG2865	8.96059e-11	0.257515	0.431	0.374	9.31184e-07
CAP	1.12815e-31	0.254834	0.228	0.123	1.17237e-27
lncRNA:CR42868	7.80941e-27	0.253093	0.251	0.149	8.11553e-23
Psc	1.17416e-14	0.245618	0.358	0.275	1.22019e-10
CG11267	1.35401e-24	0.239656	0.72	0.628	1.40709e-20
mod	1.39826e-17	0.238085	0.569	0.483	1.45307e-13
nop5	6.84586e-21	0.237107	0.459	0.356	7.11422e-17
CG30269	2.58031e-32	0.233382	0.17	0.081	2.68146e-28
RpS12	9.27173e-23	0.232024	0.982	0.949	9.63518e-19
CG8860	1.83585e-14	0.230988	0.679	0.606	1.90781e-10
Swim	7.55175e-58	0.229439	0.117	0.033	7.84778e-54
hoip	1.10134e-19	0.229099	0.488	0.386	1.14451e-15
CG6767	3.50545e-18	0.22602	0.368	0.275	3.64287e-14
CG8545	9.64098e-17	0.225794	0.284	0.204	1.00189e-12
Nplp2	5.37811e-41	0.225037	0.999	0.989	5.58893e-37
RpL18	7.3398e-28	0.223809	0.976	0.941	7.62752e-24
Hsp70Bbb	8.42235e-11	0.221878	0.107	0.064	8.75251e-07
Hsp70Bb	1.91697e-08	0.221702	0.129	0.087	0.000199211
CG13096	6.40805e-18	0.218323	0.355	0.264	6.65925e-14
RpL14	4.07106e-38	0.216652	0.997	0.975	4.23065e-34
Hsp70Ba	4.87453e-10	0.216419	0.105	0.064	5.06561e-06
CNBP	5.33449e-22	0.215436	0.949	0.901	5.5436e-18
CG8157	3.07792e-17	0.21528	0.878	0.793	3.19858e-13
Ssb-c31a	1.63746e-18	0.214483	0.458	0.361	1.70165e-14
Hsp70Aa	6.83149e-08	0.213346	0.14	0.098	0.000709928
RpS20	2.40246e-40	0.211278	0.997	0.984	2.49663e-36
HmgZ	2.5303e-14	0.211133	0.786	0.733	2.62949e-10
RpLP0-like	5.40544e-15	0.211075	0.363	0.282	5.61733e-11
Nop56	7.08522e-19	0.209165	0.492	0.395	7.36296e-15
smt3	2.28569e-26	0.209078	0.906	0.817	2.37529e-22
CG7637	1.5241e-13	0.207468	0.386	0.307	1.58384e-09
Eglp4	1.30417e-14	0.205281	0.356	0.268	1.35529e-10
CG34200	6.90056e-13	0.205216	0.383	0.308	7.17106e-09
Hsp70Ab	8.75644e-07	0.202074	0.14	0.101	0.00909969
CG7630	1.73258e-26	0.199566	0.827	0.712	1.80049e-22
Aldh	6.08878e-23	0.198775	0.766	0.658	6.32746e-19
RpL28	3.96847e-35	0.195283	0.989	0.968	4.12404e-31
Tina-1	2.26136e-12	0.194831	0.343	0.268	2.35e-08
ITP	2.05663e-14	0.193573	0.222	0.151	2.13725e-10
NimB1	4.89798e-14	0.193146	0.396	0.309	5.08998e-10
Nlp	3.79038e-16	0.192006	0.762	0.692	3.93897e-12
Gmap	3.00603e-13	0.191656	0.298	0.226	3.12387e-09
Ance-5	6.36879e-06	0.191452	0.571	0.57	0.0661845
P32	1.38187e-09	0.188788	0.381	0.321	1.43603e-05
RpL21	6.89019e-40	0.186435	0.997	0.986	7.16029e-36
Hsp23	2.40408e-09	0.186363	0.439	0.371	2.49832e-05
RpL34b	1.55463e-42	0.185409	0.986	0.955	1.61557e-38
CR43482	1.43237e-06	0.184556	0.112	0.079	0.0148852
Glo1	1.94186e-15	0.183758	0.563	0.477	2.01798e-11
sun	4.52045e-20	0.182884	0.757	0.65	4.69765e-16
Nap1	3.97669e-23	0.182346	0.793	0.695	4.13258e-19
RpII18	1.63625e-10	0.180631	0.408	0.343	1.70039e-06
RpL31	2.56543e-38	0.179074	0.984	0.962	2.666e-34
eEF1delta	3.16852e-17	0.178316	0.695	0.609	3.29272e-13
GILT3	2.23997e-14	0.17825	0.229	0.155	2.32778e-10
fat-spondin	6.11546e-07	0.178017	0.557	0.534	0.00635519
Nepl20	0.00155477	0.176972	0.295	0.274	1
RpS11	2.88062e-36	0.175798	0.998	0.986	2.99354e-32
RpL36	1.38092e-25	0.175762	0.984	0.96	1.43505e-21
RpL13A	9.68662e-33	0.174509	0.999	0.987	1.00663e-28
COX8	1.26623e-05	0.17432	0.426	0.387	0.131586
Fib	1.79216e-14	0.172344	0.402	0.318	1.86241e-10
GstD3	1.77554e-14	0.17143	0.493	0.402	1.84515e-10
Tom7	1.2059e-13	0.169562	0.715	0.624	1.25318e-09
UQCR-Q	1.01506e-13	0.168766	0.763	0.678	1.05485e-09
CG42369	6.84723e-06	0.168172	0.332	0.292	0.0711564
cpo	7.2145e-19	0.167297	0.155	0.087	7.49731e-15
RpLP1	2.01113e-25	0.166811	0.998	0.99	2.08997e-21
RpL27A	1.46376e-31	0.166767	0.997	0.987	1.52114e-27
CG34163	2.76095e-13	0.166599	0.287	0.216	2.86918e-09
puc	4.89376e-06	0.16646	0.357	0.309	0.050856
CG2199	6.16222e-15	0.165204	0.216	0.144	6.40378e-11
CG4250	2.5705e-19	0.163966	0.845	0.788	2.67127e-15
UQCR-14	1.64557e-13	0.163752	0.613	0.527	1.71008e-09
RpL7	3.40515e-38	0.163309	0.996	0.976	3.53863e-34
NimB3	7.34678e-06	0.162527	0.211	0.172	0.0763477
RpL13	1.50911e-21	0.162272	0.988	0.964	1.56826e-17
Rpb10	1.1939e-09	0.161698	0.439	0.373	1.2407e-05
RpL18A	3.48963e-27	0.16167	0.986	0.962	3.62643e-23
CG11180	1.40628e-09	0.160984	0.197	0.143	1.4614e-05
Nedd8	4.20824e-14	0.160733	0.476	0.39	4.3732e-10
Pxn	0.00750185	0.15991	0.659	0.808	1
Adk2	8.06011e-09	0.159824	0.563	0.51	8.37607e-05
CG32267	2.2142e-10	0.159471	0.461	0.394	2.301e-06
CG11236	1.8876e-22	0.159394	0.106	0.048	1.9616e-18
sta	3.10752e-34	0.159275	0.992	0.97	3.22933e-30
ATPsynF	1.81256e-16	0.159161	0.756	0.669	1.88361e-12
Sodh-2	1.68691e-07	0.158948	0.344	0.291	0.00175304
Rs1	3.16995e-11	0.158451	0.26	0.196	3.29421e-07
RpS24	4.21889e-25	0.157209	0.993	0.978	4.38427e-21
CG9922	3.25515e-10	0.157047	0.387	0.319	3.38275e-06
ATPsynC	5.70255e-13	0.15628	0.95	0.93	5.92609e-09
eIF3g1	5.08268e-12	0.15438	0.519	0.442	5.28193e-08
Dad1	0.000134754	0.153845	0.323	0.292	1
RpS15	1.56748e-44	0.15295	1	0.989	1.62893e-40
CG13159	6.00133e-57	0.152811	0.066	0.012	6.23658e-53
RpS2	4.16454e-30	0.152713	0.997	0.986	4.32779e-26
CG12512	8.5076e-09	0.151952	0.209	0.156	8.8411e-05
dUTPase	1.42131e-11	0.151888	0.504	0.43	1.47703e-07
RpS3	4.11212e-27	0.151739	0.991	0.972	4.27332e-23
CG15019	3.6078e-09	0.151331	0.357	0.298	3.74923e-05
UQCR-11	0.000331092	0.150979	0.403	0.37	1
SmD2	2.82784e-11	0.150879	0.501	0.435	2.93869e-07
SPARC	1.06033e-08	0.150404	0.633	0.673	0.00011019
roh	2.77134e-16	0.150342	0.825	0.748	2.87998e-12
NUCB1	9.4375e-06	-0.150746	0.639	0.658	0.0980745
CG31523	1.96365e-08	-0.150794	0.162	0.228	0.000204063
edl	8.37718e-12	-0.1508	0.061	0.122	8.70557e-08
Scamp	1.13936e-05	-0.151013	0.546	0.577	0.118402
SREBP	2.63104e-07	-0.151726	0.187	0.253	0.00273418
cmet	7.00789e-10	-0.152342	0.059	0.11	7.2826e-06
CG10863	8.09585e-05	-0.153395	0.363	0.412	0.841321
Hmu	4.64241e-07	-0.153422	0.2	0.262	0.00482439
Pak3	7.94382e-05	-0.153564	0.403	0.445	0.825521
CG16710	1.17202e-12	-0.153574	0.015	0.06	1.21797e-08
CG17841	4.10506e-05	-0.153756	0.159	0.202	0.426598
CG12112	4.33143e-05	-0.154089	0.176	0.218	0.450123
Klp10A	5.03462e-10	-0.154515	0.132	0.202	5.23198e-06
wun2	3.6255e-11	-0.155191	0.016	0.057	3.76762e-07
CG17574	1.22544e-09	-0.156213	0.568	0.637	1.27348e-05
Pmp70	6.75044e-10	-0.156609	0.109	0.172	7.01505e-06
Myc	0.000131598	-0.156799	0.294	0.341	1
Ttc19	8.9339e-07	-0.156889	0.073	0.114	0.00928411
CG6191	0.0043591	-0.157534	0.342	0.376	1
twf	4.46966e-07	-0.157759	0.158	0.214	0.00464487
Arpc1	6.454e-07	-0.157833	0.515	0.565	0.006707
kst	1.19491e-08	-0.15792	0.475	0.554	0.000124175
GstD1	0.00834484	-0.158308	0.951	0.929	1
mmy	6.29273e-07	-0.159158	0.335	0.407	0.0065394
Rab10	2.33566e-08	-0.160096	0.214	0.286	0.000242721
rogdi	3.45204e-11	-0.160508	0.09	0.156	3.58736e-07
pinta	1.87788e-11	-0.160559	0.097	0.166	1.95149e-07
l(3)L1231	1.25699e-08	-0.160961	0.226	0.302	0.000130627
CG1890	8.93509e-05	-0.16121	0.524	0.545	0.928535
fdl	1.7912e-06	-0.161373	0.272	0.335	0.0186141
CG6701	2.48648e-08	-0.16245	0.259	0.336	0.000258395
ref(2)P	6.96017e-07	-0.162816	0.153	0.211	0.00723301
mud	3.34741e-09	-0.163123	0.073	0.126	3.47863e-05
shep	3.99431e-14	-0.163165	0.88	0.873	4.15089e-10
ringer	1.1813e-14	-0.164068	0.04	0.104	1.2276e-10
CG43210	0.000282792	-0.164613	0.227	0.259	1
Cip4	2.62209e-08	-0.164837	0.3	0.373	0.000272488
Ilk	2.17268e-10	-0.165406	0.184	0.265	2.25784e-06
chic	4.97371e-21	-0.165764	0.968	0.966	5.16868e-17
ome	9.40819e-13	-0.166048	0.066	0.131	9.777e-09
chn	9.32017e-10	-0.166063	0.092	0.151	9.68552e-06
CG12290	5.46541e-10	-0.166277	0.086	0.145	5.67965e-06
wol	2.46321e-08	-0.166852	0.261	0.335	0.000255976
Atg8a	5.8643e-07	-0.166881	0.511	0.558	0.00609418
CG8839	1.20901e-05	-0.167187	0.419	0.471	0.125641
CG4511	2.31072e-06	-0.168375	0.255	0.312	0.024013
CG42711	5.80841e-09	-0.168427	0.384	0.471	6.0361e-05
Cyp4e2	1.09923e-11	-0.169718	0.212	0.3	1.14232e-07
SppL	1.10994e-11	-0.17029	0.095	0.165	1.15345e-07
Diap1	8.34472e-09	-0.170577	0.225	0.298	8.67183e-05
olf186-F	2.92931e-08	-0.17101	0.141	0.199	0.000304414
prominin-like	4.05049e-09	-0.171595	0.254	0.336	4.20927e-05
Syb	2.11532e-05	-0.171904	0.723	0.709	0.219824
Lamp1	1.34501e-07	-0.172204	0.611	0.649	0.00139773
Galphaq	2.81286e-09	-0.173676	0.292	0.376	2.92312e-05
pod1	0.000166892	-0.174283	0.24	0.284	1
Rac2	3.84061e-06	-0.174445	0.626	0.648	0.0399116
Naxd	0.00677589	-0.174743	0.171	0.2	1
CG5828	8.61485e-06	-0.174945	0.031	0.06	0.0895255
CG33225	0.4572	-0.175326	0.205	0.213	1
Atpalpha	8.27489e-07	-0.175457	0.568	0.614	0.00859927
CG42259	1.78572e-07	-0.176542	0.051	0.092	0.00185572
Idh	3.42029e-07	-0.176792	0.424	0.486	0.00355437
tacc	2.37477e-08	-0.176847	0.244	0.31	0.000246786
svr	7.12101e-08	-0.177073	0.381	0.457	0.000740015
lncRNA:alphagamma-element:CR32865	7.96265e-07	-0.177339	0.068	0.11	0.00827479
Vha68-2	3.58947e-10	-0.177785	0.625	0.67	3.73017e-06
CecA2	6.20616e-06	-0.177993	0.162	0.117	0.0644944
sqh	1.14257e-07	-0.179068	0.467	0.526	0.00118736
CR6900	2.99696e-11	-0.179562	0.049	0.104	3.11444e-07
ZnT63C	2.13708e-07	-0.179608	0.205	0.265	0.00222085
pyr	4.69618e-19	-0.183348	0.007	0.065	4.88027e-15
dpr17	6.43506e-07	-0.183391	0.072	0.114	0.00668731
Wbp2	5.28658e-06	-0.183474	0.353	0.409	0.0549381
jtb	2.3487e-12	-0.183498	0.064	0.126	2.44077e-08
feo	2.85871e-09	-0.183822	0.084	0.139	2.97077e-05
lqf	5.74444e-07	-0.18423	0.366	0.424	0.00596962
mt:lrRNA	1.88042e-17	-0.184525	1	1	1.95413e-13
Tsp42Ee	2.99231e-11	-0.184617	0.566	0.643	3.10961e-07
Vap33	2.69871e-08	-0.184925	0.473	0.53	0.00028045
eIF4G2	6.66489e-10	-0.185281	0.156	0.228	6.92615e-06
sano	8.21879e-13	-0.186213	0.018	0.066	8.54097e-09
CG10764	1.07328e-08	-0.186441	0.292	0.369	0.000111535
CG3558	6.21386e-13	-0.189021	0.246	0.346	6.45744e-09
l(1)G0289	3.15348e-13	-0.189283	0.461	0.566	3.2771e-09
zda	6.28696e-11	-0.190548	0.342	0.432	6.53341e-07
BI-1	6.45679e-07	-0.190972	0.292	0.357	0.00670989
Pvf2	2.32986e-14	-0.191302	0.039	0.1	2.42119e-10
sigmar	1.69e-12	-0.191356	0.159	0.244	1.75624e-08
CG3164	8.88626e-09	-0.191954	0.266	0.34	9.23461e-05
capu	3.04303e-11	-0.192097	0.163	0.241	3.16232e-07
Fim	5.16412e-06	-0.192253	0.392	0.441	0.0536655
CG1943	1.00989e-08	-0.192403	0.558	0.599	0.000104948
Glut4EF	7.30227e-08	-0.192405	0.157	0.217	0.000758852
kuz	1.66906e-14	-0.192415	0.427	0.54	1.73449e-10
CG7956	5.3425e-14	-0.194191	0.038	0.097	5.55193e-10
cact	7.58391e-10	-0.195555	0.192	0.265	7.88119e-06
CG42674	9.77443e-08	-0.196337	0.203	0.263	0.00101576
Snx6	9.75505e-11	-0.196657	0.328	0.419	1.01374e-06
Ras85D	6.98203e-10	-0.197149	0.39	0.467	7.25572e-06
N	0.000106086	-0.197376	0.343	0.386	1
PGRP-SA	4.09766e-13	-0.197614	0.04	0.096	4.25829e-09
MESK2	5.3577e-11	-0.198139	0.34	0.429	5.56773e-07
fmt	3.42285e-06	-0.198326	0.546	0.601	0.0355702
Karl	3.37255e-21	-0.19957	0.817	0.837	3.50475e-17
tum	1.34019e-10	-0.20086	0.101	0.164	1.39273e-06
jumu	8.54147e-12	-0.20154	0.079	0.144	8.8763e-08
RhoGDI	2.39285e-17	-0.201613	0.783	0.798	2.48665e-13
NijA	1.54851e-08	-0.202789	0.116	0.172	0.000160921
vir-1	2.09249e-12	-0.203378	0.559	0.66	2.17451e-08
Sap-r	5.25475e-10	-0.203441	0.679	0.737	5.46073e-06
nrv1	8.53597e-09	-0.203699	0.389	0.462	8.87058e-05
CG5854	3.52676e-14	-0.204124	0.311	0.423	3.66501e-10
cer	3.3441e-10	-0.204333	0.494	0.563	3.47519e-06
CG11357	6.59389e-09	-0.20443	0.352	0.42	6.85237e-05
Myo61F	2.37103e-11	-0.205255	0.467	0.557	2.46397e-07
Snx17	6.76698e-12	-0.206006	0.059	0.119	7.03225e-08
Mob2	1.09174e-10	-0.206858	0.211	0.286	1.13454e-06
CG4793	2.59509e-08	-0.208346	0.098	0.149	0.000269681
CG42846	5.91634e-16	-0.20894	0.051	0.121	6.14827e-12
Cortactin	2.98892e-12	-0.209107	0.277	0.366	3.10609e-08
betaTub97EF	6.00895e-11	-0.209307	0.183	0.263	6.2445e-07
lncRNA:CR44430	2.91117e-13	-0.210287	0.01	0.052	3.02528e-09
Irk1	0.00102722	-0.210775	0.227	0.256	1
CG32264	1.97836e-16	-0.212879	0.073	0.153	2.05591e-12
Chd64	1.51325e-30	-0.213054	0.986	0.973	1.57257e-26
Map205	4.0283e-09	-0.213997	0.396	0.457	4.18621e-05
Fer2LCH	1.73724e-11	-0.214103	0.786	0.811	1.80534e-07
ScsbetaA	1.37034e-10	-0.215524	0.179	0.256	1.42405e-06
CG31637	3.5707e-07	-0.218046	0.347	0.407	0.00371067
Mlc-c	2.78216e-12	-0.218876	0.631	0.678	2.89122e-08
Vrp1	5.06641e-13	-0.218929	0.085	0.155	5.26502e-09
pst	1.57966e-09	-0.219579	0.268	0.338	1.64158e-05
RhoGAP92B	2.15871e-13	-0.220571	0.239	0.336	2.24333e-09
Rab11	3.20604e-21	-0.22069	0.772	0.792	3.33172e-17
CG10431	3.36535e-08	-0.221581	0.128	0.185	0.000349727
ct	5.3122e-15	-0.223791	0.443	0.546	5.52043e-11
LpR2	1.12741e-06	-0.224944	0.519	0.554	0.011716
wge	9.0345e-17	-0.226294	0.29	0.407	9.38865e-13
CG13117	5.88744e-07	-0.226302	0.602	0.625	0.00611823
mib2	9.80672e-15	-0.226307	0.116	0.202	1.01911e-10
28SrRNA-Psi:CR45860	0.00346543	-0.227848	0.099	0.125	1
Traf-like	1.62523e-10	-0.227971	0.201	0.278	1.68894e-06
CycB	8.2804e-14	-0.229893	0.097	0.173	8.60499e-10
Cam	1.2982e-13	-0.230277	0.969	0.952	1.34909e-09
Ctr1A	2.05488e-06	-0.230578	0.158	0.213	0.0213543
ATP8B	1.58099e-16	-0.233375	0.481	0.582	1.64297e-12
Act5C	6.04767e-31	-0.233408	0.997	0.992	6.28474e-27
mt:ND3	1.21022e-14	-0.234471	0.66	0.71	1.25766e-10
Gip	0.00526593	-0.236257	0.172	0.203	1
28SrRNA-Psi:CR45851	0.0667045	-0.237112	0.285	0.303	1
Ald1	0.000101316	-0.237898	0.394	0.441	1
Cdc42	1.43281e-20	-0.238637	0.607	0.702	1.48897e-16
CG43125	3.12565e-21	-0.238696	0.175	0.302	3.24818e-17
Sr-CIV	9.83584e-21	-0.24057	0.066	0.158	1.02214e-16
Rip11	3.25725e-18	-0.241532	0.415	0.528	3.38493e-14
spir	1.79025e-24	-0.24159	0.02	0.102	1.86042e-20
Mmp2	2.52606e-16	-0.241733	0.031	0.095	2.62508e-12
CG14629	1.07598e-23	-0.24354	0.875	0.877	1.11816e-19
Vha55	1.16275e-10	-0.24764	0.527	0.584	1.20833e-06
polo	1.15554e-12	-0.249025	0.135	0.211	1.20083e-08
CG33461	2.31969e-10	-0.25	0.114	0.173	2.41062e-06
VhaAC45	3.81881e-15	-0.252505	0.479	0.57	3.96851e-11
CG10126	1.94692e-19	-0.254727	0.025	0.095	2.02323e-15
mt:ND4	6.5853e-23	-0.255255	0.843	0.87	6.84345e-19
tx	1.41063e-13	-0.255756	0.058	0.122	1.46593e-09
GstE2	2.13449e-07	-0.256352	0.155	0.205	0.00221816
CG12133	5.07408e-12	-0.256686	0.026	0.073	5.27298e-08
mt:ND2	1.45049e-08	-0.257169	0.58	0.623	0.000150735
CG33494	4.54151e-15	-0.257427	0.704	0.726	4.71954e-11
Ac78C	7.69339e-20	-0.258521	0.056	0.141	7.99497e-16
TwdlE	1.36592e-11	-0.259211	0.103	0.172	1.41946e-07
C3G	3.3107e-18	-0.260498	0.128	0.226	3.44048e-14
Frl	4.06113e-31	-0.265838	0.68	0.776	4.22033e-27
tna	3.89589e-10	-0.266145	0.099	0.159	4.04861e-06
Thor	6.95672e-07	-0.271153	0.137	0.185	0.00722942
Eb1	4.49991e-14	-0.272069	0.42	0.506	4.6763e-10
CG9917	7.9793e-19	-0.273178	0.3	0.421	8.29208e-15
Treh	1.66812e-10	-0.274279	0.129	0.196	1.73351e-06
CG2065	3.36298e-19	-0.274987	0.037	0.111	3.4948e-15
shot	3.21485e-09	-0.275183	0.287	0.361	3.34087e-05
rhea	4.48548e-14	-0.276484	0.289	0.385	4.66131e-10
Pen	1.30746e-10	-0.278538	0.443	0.495	1.35871e-06
Myo31DF	4.09428e-15	-0.279962	0.253	0.348	4.25478e-11
CG1648	0.0122385	-0.281649	0.203	0.219	1
NimC1	1.4498e-17	-0.282514	0.129	0.229	1.50663e-13
CG7860	0.0062932	-0.285899	0.042	0.06	1
Spn88Eb	1.40971e-11	-0.286358	0.236	0.312	1.46497e-07
mt:ND1	2.83087e-25	-0.28964	0.865	0.883	2.94184e-21
scra	1.10717e-14	-0.290221	0.136	0.219	1.15057e-10
CG16713	1.12051e-11	-0.2946	0.013	0.053	1.16443e-07
path	1.45647e-24	-0.295448	0.075	0.183	1.51357e-20
CG11791	9.51005e-13	-0.295701	0.268	0.345	9.88284e-09
mt:ND5	2.8381e-22	-0.296982	0.839	0.87	2.94936e-18
CG11686	1.31973e-16	-0.300854	0.182	0.278	1.37146e-12
28SrRNA:CR45844	0.0389287	-0.310038	0.295	0.313	1
Fkbp59	1.03493e-08	-0.310789	0.133	0.195	0.00010755
CG10469	1.63629e-12	-0.317459	0.039	0.094	1.70043e-08
Swip-1	5.12227e-24	-0.320428	0.384	0.504	5.32307e-20
GstE1	5.49252e-16	-0.321005	0.17	0.265	5.70782e-12
mt:srRNA	6.02606e-19	-0.326646	0.535	0.621	6.26228e-15
Prip	1.25036e-45	-0.336763	0.724	0.807	1.29938e-41
yellow-f	1.73751e-25	-0.337115	0.158	0.29	1.80562e-21
pre-rRNA:CR45846	0.000364286	-0.347831	0.315	0.362	1
CG31219	1.63992e-18	-0.34799	0.07	0.151	1.70421e-14
CecB	9.07097e-07	-0.349302	0.049	0.084	0.00942656
pre-rRNA:CR45847	0.00049272	-0.349741	0.32	0.367	1
CG17760	1.03359e-17	-0.351881	0.163	0.256	1.07411e-13
Meltrin	6.64969e-17	-0.352774	0.453	0.548	6.91036e-13
28SrRNA-Psi:CR45855	9.09282e-18	-0.356713	0.081	0.164	9.44926e-14
CG12065	4.77951e-12	-0.358305	0.565	0.633	4.96687e-08
CG6891	1.64587e-20	-0.361396	0.341	0.444	1.71039e-16
CecA1	0.000146474	-0.366207	0.068	0.096	1
CG1572	1.04282e-25	-0.366622	0.597	0.678	1.0837e-21
mys	5.43203e-15	-0.366931	0.404	0.481	5.64496e-11
pre-rRNA:CR45845	1.95366e-08	-0.369027	0.438	0.524	0.000203025
CG9932	5.28699e-17	-0.371644	0.243	0.342	5.49424e-13
capt	2.03471e-32	-0.373685	0.476	0.598	2.11447e-28
28SrRNA-Psi:CR40741	1.07435e-11	-0.37551	0.097	0.163	1.11646e-07
AnxB9	8.63944e-27	-0.37601	0.7	0.753	8.97811e-23
Atox1	1.759e-08	-0.376152	0.284	0.362	0.000182796
cib	7.25942e-51	-0.383743	0.86	0.885	7.54399e-47
PPO3	8.37574e-11	-0.387253	0.016	0.055	8.70406e-07
trio	2.05827e-26	-0.38786	0.138	0.26	2.13896e-22
cher	1.27618e-32	-0.391489	0.415	0.566	1.3262e-28
fax	8.91776e-07	-0.391671	0.318	0.366	0.00926734
28SrRNA-Psi:CR45848	3.29484e-10	-0.39355	0.091	0.149	3.424e-06
Act42A	4.95026e-81	-0.410571	0.988	0.983	5.14431e-77
Arc1	3.52429e-10	-0.430055	0.513	0.556	3.66244e-06
E(spl)mbeta-HLH	2.27473e-28	-0.431618	0.144	0.274	2.36389e-24
mthl4	7.69425e-19	-0.443517	0.075	0.158	7.99587e-15
CG30090	5.67926e-19	-0.446037	0.118	0.209	5.90189e-15
18SrRNA:CR41548	0.465588	-0.465924	0.278	0.275	1
lncRNA:CR44316	3.98053e-06	-0.470114	0.1	0.138	0.0413656
CG43236	7.1076e-29	-0.479833	0.19	0.329	7.38622e-25
28SrRNA:CR45837	4.81674e-06	-0.481078	0.156	0.198	0.0500555
28SrRNA-Psi:CR40596	3.83866e-14	-0.485879	0.394	0.465	3.98914e-10
18SrRNA:CR45838	0.45543	-0.497083	0.277	0.272	1
pre-rRNA:CR45856	0.000146678	-0.502491	0.288	0.332	1
mthl2	3.97715e-43	-0.509956	0.28	0.456	4.13305e-39
18SrRNA:CR45841	0.293741	-0.514721	0.269	0.268	1
CG5399	1.99611e-10	-0.520187	0.235	0.301	2.07436e-06
28SrRNA-Psi:CR45859	2.15712e-26	-0.525957	0.222	0.347	2.24168e-22
CG43124	3.56643e-43	-0.527995	0.342	0.509	3.70623e-39
Men	1.0473e-08	-0.534938	0.429	0.488	0.000108836
CG42807	2.50278e-31	-0.569859	0.452	0.583	2.60089e-27
Drs	4.52071e-19	-0.574739	0.114	0.215	4.69792e-15
18SrRNA-Psi:CR41602	6.68678e-13	-0.580669	0.389	0.456	6.9489e-09
18SrRNA-Psi:CR45861	0.00859359	-0.600143	0.207	0.224	1
RapGAP1	1.67619e-47	-0.609473	0.253	0.434	1.7419e-43
Tep1	8.54459e-38	-0.627197	0.242	0.399	8.87954e-34
CG15347	0.0582595	-0.68017	0.234	0.24	1
CG15784	4.52112e-18	-0.710745	0.093	0.179	4.69835e-14
CecC	5.95488e-12	-0.721236	0.14	0.205	6.18831e-08
Mmp1	2.57542e-21	-0.72178	0.222	0.32	2.67637e-17
Ggamma30A	1.62043e-69	-0.768543	0.226	0.453	1.68395e-65
lectin-24A	3.06643e-37	-0.778939	0.053	0.181	3.18664e-33
CG10467	1.47919e-08	-0.875362	0.061	0.108	0.000153718
CG43175	2.29653e-56	-0.911565	0.079	0.264	2.38656e-52
CG14610	3.69145e-09	-0.916945	0.017	0.051	3.83615e-05
Mtk	9.8017e-19	-0.970494	0.179	0.278	1.01859e-14
atilla	2.5246e-16	-0.973681	0.021	0.079	2.62356e-12
alphaTub85E	3.72868e-37	-1.01723	0.109	0.254	3.87484e-33
betaTub60D	8.05527e-15	-1.0942	0.032	0.09	8.37104e-11
MtnA	0.0610638	-1.09948	0.279	0.291	1
fok	0.93295	-1.10913	0.103	0.101	1
PPO1	0.000316988	-1.85709	0.179	0.217	1
PPO2	0.000278993	-2.06513	0.244	0.285	1

## Sheet: PM5
gene	cluster6.p_val	cluster6.avg_logFC	cluster6.pct.1	cluster6.pct.2	cluster6.p_val_adj
CG15784	0	2.32748	0.811	0.13	0
Arc1	1.50341e-208	1.32726	0.831	0.535	1.56234e-204
lncRNA:CR44430	0	1.28978	0.432	0.024	0
CG3348	6.6991e-97	1.13544	0.391	0.172	6.9617e-93
CG18547	0	0.966382	0.416	0.072	0
GstE6	4.22529e-217	0.919308	0.77	0.416	4.39092e-213
BI-1	7.87377e-115	0.882802	0.618	0.335	8.18242e-111
GstD3	2.86949e-161	0.872083	0.723	0.388	2.98198e-157
GstE1	6.15438e-144	0.86537	0.539	0.24	6.39563e-140
lncRNA:CR43855	5.4399e-45	0.810026	0.705	0.569	5.65314e-41
Arc2	3.78274e-147	0.808034	0.435	0.163	3.93102e-143
ref(2)P	2.27803e-79	0.796107	0.404	0.194	2.36733e-75
Tsp42Ed	1.87135e-150	0.759747	0.479	0.183	1.9447e-146
CG10638	1.2255e-186	0.748254	0.654	0.298	1.27353e-182
Ssrp	1.35059e-98	0.724867	0.561	0.321	1.40353e-94
CG13887	9.88731e-92	0.718887	0.703	0.473	1.02749e-87
lncRNA:CR44138	6.9739e-163	0.687717	0.122	0.012	7.24727e-159
MRP	1.38158e-125	0.680063	0.586	0.283	1.43574e-121
CG12171	3.37261e-130	0.672879	0.498	0.216	3.50482e-126
eIF6	8.94828e-129	0.671887	0.476	0.204	9.29906e-125
CR43105	4.2479e-20	0.670131	0.26	0.166	4.41441e-16
IscU	2.07604e-129	0.670037	0.661	0.38	2.15742e-125
CG3008	2.29435e-187	0.66668	0.346	0.089	2.38428e-183
Jafrac1	4.61254e-142	0.652922	0.891	0.705	4.79335e-138
cl	2.29436e-115	0.641005	0.764	0.539	2.3843e-111
Gapdh2	2.96368e-40	0.636264	0.601	0.462	3.07986e-36
CG34423	1.63648e-84	0.615697	0.385	0.173	1.70063e-80
CG15347	2.76608e-122	0.602807	0.493	0.223	2.87451e-118
GstD5	1.05102e-152	0.599746	0.126	0.014	1.09222e-148
spir	7.48379e-149	0.585997	0.305	0.082	7.77716e-145
CG14907	7.92102e-123	0.585321	0.368	0.132	8.23152e-119
Fer2LCH	1.76378e-46	0.580897	0.894	0.804	1.83292e-42
La	6.1973e-70	0.565089	0.54	0.333	6.44023e-66
scyl	1.1868e-55	0.561923	0.658	0.466	1.23333e-51
CG2909	4.40013e-218	0.561642	0.245	0.039	4.57261e-214
Xrp1	6.97066e-109	0.55599	0.87	0.69	7.24391e-105
lectin-24A	2.85759e-18	0.552053	0.257	0.166	2.96961e-14
CG8620	2.14101e-41	0.544156	0.527	0.356	2.22494e-37
CG33494	2.68983e-99	0.543585	0.883	0.714	2.79527e-95
Dgp-1	4.59057e-36	0.538216	0.149	0.059	4.77052e-32
CG17327	1.08223e-68	0.518482	0.328	0.15	1.12465e-64
GstD1	2.42806e-75	0.517737	0.971	0.928	2.52324e-71
ImpL2	1.2429e-118	0.516929	0.126	0.019	1.29162e-114
CG1882	1.15265e-92	0.500883	0.281	0.096	1.19783e-88
Archease	1.70849e-95	0.498208	0.36	0.144	1.77546e-91
Scgdelta	6.32529e-30	0.492381	0.125	0.05	6.57324e-26
CG14695	6.19118e-94	0.492343	0.311	0.111	6.43388e-90
Hsc70-3	7.81987e-10	0.491209	0.913	0.888	8.12641e-06
PHGPx	1.03777e-48	0.477107	0.547	0.358	1.07846e-44
Fer1HCH	1.11325e-40	0.473878	0.779	0.63	1.15689e-36
GstD2	7.42507e-28	0.47068	0.073	0.022	7.71613e-24
N	1.41851e-70	0.468567	0.61	0.368	1.47411e-66
CG3448	7.01374e-134	0.466811	0.23	0.053	7.28868e-130
mbf1	5.91341e-67	0.463543	0.628	0.409	6.14522e-63
AOX1	8.89274e-139	0.462367	0.276	0.07	9.24133e-135
kek1	3.91871e-49	0.455974	0.32	0.161	4.07233e-45
CG6512	1.23234e-69	0.444635	0.404	0.196	1.28064e-65
GstD9	4.01204e-34	0.444346	0.278	0.151	4.16931e-30
CG10916	2.96671e-122	0.442556	0.27	0.074	3.08301e-118
CG2064	3.15929e-69	0.440349	0.272	0.107	3.28313e-65
RtcB	1.33627e-86	0.439655	0.367	0.154	1.38865e-82
JhI-26	4.3138e-82	0.438758	0.297	0.11	4.4829e-78
CaBP1	4.68325e-16	0.434319	0.747	0.643	4.86683e-12
lncRNA:CR43264	1.27722e-20	0.428733	0.069	0.024	1.32729e-16
yip2	2.96909e-49	0.415697	0.488	0.294	3.08548e-45
Gp93	2.29862e-08	0.414823	0.782	0.727	0.000238873
CG44250	1.77477e-32	0.413457	0.335	0.199	1.84434e-28
IM18	8.35832e-07	0.411775	0.12	0.08	0.00868596
Nfs1	3.45949e-67	0.410599	0.327	0.145	3.59511e-63
Nxt1	7.95737e-51	0.409217	0.404	0.228	8.2693e-47
rad50	8.21439e-67	0.407933	0.255	0.099	8.53639e-63
Cyt-b5	3.27786e-22	0.407831	0.604	0.474	3.40635e-18
CG1703	7.04942e-37	0.402026	0.487	0.334	7.32576e-33
Apoltp	3.55407e-84	0.397126	0.131	0.027	3.69339e-80
CG9065	1.46323e-68	0.396217	0.413	0.205	1.52059e-64
Nepl4	3.14176e-50	0.39596	0.289	0.136	3.26492e-46
GstE9	3.77886e-65	0.389529	0.159	0.047	3.92699e-61
Ubc6	4.71214e-58	0.38626	0.507	0.299	4.89686e-54
CR43186	4.29669e-42	0.38211	0.12	0.039	4.46512e-38
CG17904	1.82867e-71	0.381864	0.316	0.134	1.90036e-67
CG2076	4.43641e-58	0.381287	0.409	0.219	4.61032e-54
Tspo	3.69043e-32	0.376637	0.447	0.297	3.8351e-28
Chchd2	2.68788e-38	0.375576	0.72	0.582	2.79324e-34
CG42365	4.23866e-73	0.374923	0.193	0.059	4.40482e-69
fax	3.76334e-17	0.372652	0.458	0.356	3.91086e-13
Manf	1.77154e-18	0.370325	0.625	0.526	1.84099e-14
Rpb12	1.36365e-43	0.365909	0.52	0.339	1.4171e-39
Gclc	1.22146e-40	0.358634	0.363	0.205	1.26934e-36
RPA3	9.51808e-50	0.34936	0.402	0.22	9.89119e-46
bin3	3.87643e-23	0.348975	0.425	0.308	4.02838e-19
sel	8.10354e-12	0.341392	0.472	0.383	8.4212e-08
NTPase	4.98523e-23	0.339826	0.317	0.199	5.18065e-19
Cat	3.25876e-15	0.335104	0.337	0.246	3.3865e-11
crc	1.03097e-28	0.332329	0.632	0.507	1.07138e-24
GstE3	6.81447e-43	0.325073	0.136	0.046	7.0816e-39
RpA-70	4.82461e-32	0.323415	0.369	0.227	5.01373e-28
Sirup	3.11356e-10	0.322491	0.136	0.085	3.23561e-06
Ugt37D1	1.24858e-05	0.322408	0.215	0.169	0.129752
GstE2	3.66937e-29	0.321635	0.324	0.193	3.81321e-25
Prp31	4.56536e-46	0.318213	0.213	0.09	4.74432e-42
GstT1	4.47942e-36	0.312835	0.444	0.284	4.65501e-32
CG15098	5.12549e-56	0.311663	0.929	0.864	5.32641e-52
CG32549	4.99668e-48	0.305448	0.316	0.154	5.19255e-44
CG12868	2.77035e-77	0.305269	0.13	0.028	2.87895e-73
CG4259	1.00065e-40	0.302066	0.851	0.732	1.03987e-36
AdSS	3.60022e-38	0.301661	0.469	0.298	3.74134e-34
Hsc70-4	6.82533e-38	0.300303	0.97	0.918	7.09288e-34
Eno	2.68189e-09	0.297868	0.591	0.505	2.78702e-05
REG	5.02527e-28	0.297703	0.611	0.468	5.22226e-24
Ubi-p63E	9.38987e-19	0.293493	0.528	0.396	9.75796e-15
Clbn	2.31925e-36	0.289992	0.234	0.115	2.41016e-32
CG8549	3.54814e-42	0.288808	0.243	0.114	3.68723e-38
ver	1.30918e-58	0.287461	0.192	0.066	1.3605e-54
GstE7	4.77349e-46	0.285881	0.198	0.079	4.96061e-42
Ubi-p5E	4.49172e-26	0.285839	0.663	0.516	4.6678e-22
E(spl)mbeta-HLH	2.95045e-29	0.283863	0.405	0.255	3.06611e-25
bcn92	1.65129e-47	0.283471	0.258	0.118	1.71603e-43
Pvf2	6.00447e-39	0.283064	0.202	0.089	6.23984e-35
CG42553	1.65714e-85	0.281917	0.135	0.029	1.7221e-81
CG44008	2.96094e-39	0.281712	0.164	0.066	3.07701e-35
CG32195	1.42494e-26	0.281293	0.144	0.064	1.4808e-22
mre11	1.65512e-68	0.280709	0.18	0.055	1.72e-64
rdog	8.41766e-138	0.279835	0.113	0.012	8.74763e-134
Der-1	7.46978e-15	0.279695	0.406	0.305	7.7626e-11
CG4858	3.58566e-40	0.279205	0.269	0.134	3.72622e-36
Mocs1	6.60037e-57	0.278009	0.16	0.051	6.85911e-53
Irbp18	1.25005e-70	0.27706	0.179	0.054	1.29906e-66
CG5958	0.00226586	0.274116	0.299	0.267	1
h	2.5596e-27	0.274046	0.482	0.331	2.65993e-23
P58IPK	5.25639e-09	0.272924	0.291	0.219	5.46244e-05
Lst8	1.32996e-31	0.272755	0.223	0.113	1.38209e-27
Trp1	3.37417e-08	0.272405	0.417	0.347	0.000350643
alph	1.10377e-17	0.266941	0.46	0.356	1.14704e-13
meigo	2.43145e-19	0.265119	0.275	0.177	2.52676e-15
foi	2.76998e-22	0.264818	0.219	0.124	2.87857e-18
CG6769	9.72096e-27	0.261336	0.255	0.143	1.0102e-22
CG2017	3.0253e-32	0.258482	0.203	0.097	3.14389e-28
Tim17b	6.57803e-22	0.256704	0.685	0.57	6.83589e-18
sra	2.98895e-35	0.255365	0.321	0.177	3.10611e-31
CG33465	4.96442e-15	0.255315	0.466	0.372	5.15902e-11
CG6770	9.71242e-05	0.254347	0.326	0.273	1
ctrip	3.22288e-31	0.252405	0.289	0.16	3.34922e-27
lncRNA:CR42862	1.20445e-17	0.252172	0.506	0.391	1.25166e-13
Nipped-B	5.50364e-21	0.251703	0.452	0.331	5.71939e-17
Inx3	1.31444e-50	0.251628	0.081	0.017	1.36597e-46
Kr-h2	1.01205e-06	0.251409	0.344	0.28	0.0105172
CG12825	2.74059e-143	0.25055	0.089	0.007	2.84802e-139
GstE8	6.56887e-46	0.250251	0.154	0.054	6.82637e-42
CG8157	0.0104121	0.249284	0.792	0.8	1
CG2918	7.39161e-05	0.248524	0.527	0.472	0.768136
GstO3	9.47327e-12	0.248112	0.615	0.544	9.84462e-08
GLS	2.04063e-41	0.245237	0.211	0.092	2.12063e-37
alpha-Est7	8.61285e-21	0.244745	0.189	0.104	8.95047e-17
agt	4.30362e-34	0.244405	0.376	0.212	4.47232e-30
CG8209	1.10079e-22	0.24044	0.328	0.212	1.14394e-18
CG5112	2.13562e-25	0.240434	0.395	0.259	2.21934e-21
CG6171	3.7311e-46	0.23952	0.17	0.063	3.87736e-42
CG31694	3.76104e-26	0.239497	0.277	0.16	3.90848e-22
Hmgs	2.73033e-17	0.239177	0.198	0.117	2.83736e-13
CG31549	2.51436e-24	0.238938	0.229	0.127	2.61293e-20
CG42846	2.97722e-30	0.235518	0.218	0.109	3.09393e-26
CG9646	2.34522e-24	0.235059	0.215	0.118	2.43715e-20
AGO2	7.03518e-21	0.234543	0.429	0.305	7.31096e-17
GstD7	2.0491e-20	0.233784	0.224	0.131	2.12942e-16
eIF2beta	5.09849e-09	0.233643	0.395	0.325	5.29835e-05
CG7627	4.28881e-26	0.232527	0.287	0.166	4.45693e-22
AMPdeam	2.00205e-27	0.232284	0.224	0.119	2.08053e-23
CG33461	8.10197e-17	0.231873	0.252	0.163	8.41957e-13
CG17294	1.64647e-49	0.231209	0.171	0.061	1.71101e-45
Sil1	2.51137e-12	0.230133	0.096	0.05	2.60982e-08
Irbp	4.76149e-45	0.229415	0.15	0.052	4.94814e-41
Sec22	3.79773e-23	0.228802	0.347	0.225	3.9466e-19
CG10337	2.34765e-22	0.227756	0.167	0.085	2.43968e-18
Rpb10	9.8364e-25	0.227729	0.513	0.369	1.0222e-20
CG11710	1.19133e-37	0.224056	0.171	0.07	1.23803e-33
CG33460	5.35939e-08	0.222843	0.41	0.351	0.000556948
CG42496	3.31797e-38	0.222626	0.151	0.058	3.44803e-34
Rpn2	2.10356e-18	0.222614	0.481	0.361	2.18602e-14
TER94	7.05936e-15	0.221814	0.659	0.54	7.33608e-11
Ku80	9.56092e-36	0.219604	0.096	0.03	9.93571e-32
Socs36E	8.28254e-32	0.219591	0.137	0.055	8.60722e-28
Tep4	8.61901e-24	0.217305	0.694	0.539	8.95687e-20
CycG	4.20535e-24	0.215849	0.917	0.816	4.3702e-20
CG31142	3.45895e-23	0.215612	0.254	0.148	3.59454e-19
rho	1.92484e-55	0.214443	0.113	0.029	2.0003e-51
pAbp	1.73747e-43	0.213883	0.998	0.993	1.80557e-39
lncRNA:CR44459	6.32852e-17	0.211751	0.146	0.078	6.5766e-13
kraken	1.28034e-21	0.211695	0.244	0.144	1.33053e-17
CG14906	1.43411e-27	0.209401	0.15	0.067	1.49033e-23
Ref1	1.66885e-21	0.208921	0.504	0.366	1.73427e-17
Atg8a	9.44344e-18	0.208708	0.661	0.548	9.81362e-14
Cyp6d4	3.60146e-25	0.208298	0.164	0.079	3.74264e-21
CG7130	7.88616e-19	0.207581	0.1	0.045	8.1953e-15
p53	3.37642e-44	0.207252	0.105	0.03	3.50878e-40
pic	1.60481e-18	0.206971	0.313	0.205	1.66772e-14
Ufd4	1.20667e-16	0.206192	0.243	0.153	1.25397e-12
lost	1.84409e-20	0.205355	0.841	0.754	1.91638e-16
CG9331	1.41877e-17	0.204582	0.621	0.508	1.47439e-13
RnrL	2.77194e-18	0.203444	0.265	0.166	2.8806e-14
CG3740	1.01339e-37	0.201639	0.169	0.068	1.05312e-33
CG18343	1.17157e-09	0.201607	0.287	0.215	1.2175e-05
hoip	1.51285e-15	0.200534	0.501	0.387	1.57215e-11
Wbp2	5.1645e-08	0.199551	0.477	0.4	0.000536695
CG11267	2.98489e-19	0.199094	0.743	0.628	3.1019e-15
Hsp70Aa	6.89655e-05	0.198268	0.132	0.099	0.71669
egr	1.09136e-46	0.197892	0.13	0.04	1.13414e-42
CG17841	6.47691e-15	0.197868	0.285	0.193	6.7308e-11
Phb2	2.12678e-15	0.197056	0.458	0.346	2.21015e-11
Pop2	2.8078e-17	0.196659	0.296	0.196	2.91786e-13
Pbgs	1.05347e-17	0.196507	0.179	0.103	1.09477e-13
Qtzl	1.51974e-28	0.195558	0.127	0.051	1.57931e-24
EMC8-9	2.74038e-15	0.195493	0.22	0.139	2.8478e-11
CG30283	2.9503e-08	0.195049	0.311	0.246	0.000306595
prage	1.80564e-17	0.193538	0.248	0.154	1.87643e-13
Prosbeta4	9.78828e-16	0.192714	0.648	0.543	1.0172e-11
Not1	6.50537e-15	0.191186	0.646	0.535	6.76038e-11
Prosalpha6	9.77851e-14	0.190823	0.497	0.389	1.01618e-09
CG9922	1.89089e-13	0.190571	0.422	0.318	1.96501e-09
CG42362	1.04757e-29	0.190316	0.106	0.039	1.08864e-25
CG6878	4.17125e-20	0.190122	0.294	0.188	4.33477e-16
CG17124	3.47595e-18	0.190042	0.094	0.041	3.61221e-14
CG12177	1.72125e-22	0.189154	0.099	0.04	1.78872e-18
Hrd3	9.98939e-06	0.189016	0.193	0.149	0.10381
CG1582	2.20345e-36	0.188584	0.15	0.058	2.28982e-32
Abl	0.317991	0.187894	0.471	0.46	1
asRNA:CR44179	2.63406e-22	0.187707	0.191	0.101	2.73732e-18
Hsp70Ab	6.91315e-05	0.18704	0.136	0.102	0.718414
bgm	9.44307e-39	0.186139	0.125	0.042	9.81323e-35
Zip99C	5.05211e-17	0.185839	0.203	0.121	5.25016e-13
nrv3	3.42718e-08	0.184736	0.311	0.246	0.000356153
Tom20	3.05788e-19	0.184545	0.694	0.565	3.17775e-15
Hsp70Bbb	1.96041e-05	0.184306	0.096	0.065	0.203726
CG32625	5.8624e-64	0.184165	0.077	0.013	6.0922e-60
Rpn9	4.48967e-12	0.184066	0.419	0.326	4.66567e-08
Prosbeta7	3.1747e-14	0.184057	0.606	0.502	3.29914e-10
obe	8.19549e-35	0.183925	0.114	0.039	8.51675e-31
l(2)37Cc	8.65795e-13	0.183925	0.517	0.413	8.99734e-09
Aprt	8.1462e-20	0.183623	0.181	0.099	8.46554e-16
Rpt4	4.23979e-12	0.182748	0.452	0.353	4.40599e-08
Prosbeta5	3.23661e-13	0.182434	0.6	0.49	3.36348e-09
ncm	1.9293e-15	0.182412	0.378	0.272	2.00492e-11
hid	2.31271e-82	0.181319	0.071	0.008	2.40336e-78
CG18596	1.16113e-35	0.181021	0.122	0.043	1.20664e-31
Bet1	1.16105e-09	0.180309	0.273	0.202	1.20657e-05
Gcn5	2.20153e-37	0.179854	0.115	0.038	2.28783e-33
Hsp70Ba	2.47046e-05	0.179632	0.096	0.065	0.256731
CG7506	4.056e-17	0.179628	0.16	0.089	4.215e-13
Cnx99A	1.12747e-07	0.179075	0.576	0.498	0.00117167
CG9149	3.328e-08	0.175965	0.255	0.193	0.000345846
Prosalpha4	2.61853e-11	0.175864	0.515	0.414	2.72117e-07
Srp54	2.0079e-13	0.175414	0.306	0.216	2.08661e-09
Prosalpha5	8.92745e-11	0.174902	0.602	0.512	9.27741e-07
mRpL30	6.03774e-15	0.174621	0.275	0.186	6.27442e-11
Irk1	9.74793e-05	0.173719	0.297	0.251	1
Mvl	2.81217e-16	0.173514	0.312	0.21	2.92241e-12
CG32369	2.4656e-14	0.17327	0.218	0.139	2.56225e-10
Prosbeta1	2.17726e-12	0.172603	0.532	0.44	2.26261e-08
CG34228	3.42448e-16	0.172599	0.147	0.08	3.55872e-12
CG30148	4.84127e-16	0.172031	0.143	0.077	5.03104e-12
CG17760	2.25925e-12	0.171935	0.336	0.243	2.34781e-08
CG14464	6.52523e-15	0.170779	0.343	0.244	6.78102e-11
CG32425	7.24169e-11	0.170643	0.276	0.198	7.52556e-07
Lam	3.76063e-14	0.169861	0.716	0.602	3.90805e-10
Hsp70Bb	0.0020109	0.169051	0.114	0.089	1
NUCB1	4.24031e-10	0.169022	0.729	0.651	4.40653e-06
CG34250	8.03176e-16	0.168601	0.201	0.122	8.3466e-12
SREBP	0.0208439	0.168432	0.268	0.246	1
CG9396	1.84114e-12	0.167984	0.205	0.133	1.91332e-08
Ero1L	2.05246e-15	0.167757	0.079	0.035	2.13291e-11
cactin	1.06017e-30	0.166743	0.103	0.036	1.10173e-26
Nph	9.18268e-09	0.166159	0.548	0.468	9.54264e-05
iPLA2-VIA	1.38655e-05	0.165993	0.169	0.127	0.14409
ThrRS	5.1469e-05	0.165248	0.215	0.174	0.534866
Nepl3	3.46868e-17	0.16438	0.277	0.177	3.60465e-13
trbl	5.84116e-13	0.164359	0.142	0.083	6.07013e-09
CBP	1.4027e-19	0.164056	0.063	0.022	1.45768e-15
Ir40a	2.92707e-08	0.164048	0.134	0.087	0.000304181
CG6066	5.48624e-14	0.163956	0.149	0.086	5.7013e-10
l(3)72Ab	6.17275e-17	0.163605	0.228	0.14	6.41472e-13
CG32641	5.77199e-27	0.162443	0.139	0.06	5.99825e-23
vib	5.02449e-12	0.162228	0.478	0.374	5.22145e-08
CG9945	9.7916e-34	0.161951	0.105	0.035	1.01754e-29
Trxr-1	1.46688e-12	0.161514	0.533	0.431	1.52438e-08
SerRS	4.91485e-14	0.160669	0.457	0.348	5.10752e-10
Rab1	2.31262e-13	0.160395	0.682	0.579	2.40328e-09
RpL21	3.24632e-27	0.160105	0.996	0.986	3.37358e-23
CG6701	3.40996e-12	0.159945	0.426	0.324	3.54363e-08
asRNA:CR46089	1.96084e-45	0.159784	0.077	0.017	2.03771e-41
tx	1.40675e-14	0.159651	0.187	0.112	1.4619e-10
MESK2	2.3981e-13	0.15953	0.53	0.416	2.49211e-09
scf	1.96971e-09	0.15916	0.777	0.688	2.04693e-05
c11.1	5.83138e-11	0.158832	0.14	0.086	6.05997e-07
Nsf2	1.29654e-13	0.158828	0.249	0.167	1.34737e-09
loco	5.1081e-13	0.158779	0.389	0.284	5.30834e-09
cnn	1.72875e-15	0.158237	0.185	0.11	1.79651e-11
CG33995	3.66392e-11	0.15816	0.21	0.142	3.80755e-07
eIF3g1	2.03589e-12	0.157765	0.555	0.441	2.1157e-08
Prosbeta2	9.94919e-11	0.157347	0.516	0.419	1.03392e-06
CG5323	1.10499e-13	0.157093	0.235	0.155	1.1483e-09
Rab18	1.48066e-12	0.157034	0.243	0.165	1.53871e-08
Nmda1	6.68336e-10	0.155981	0.532	0.434	6.94535e-06
Prestin	1.47015e-08	0.15568	0.15	0.101	0.000152778
CR43275	2.62758e-15	0.155573	0.063	0.025	2.73058e-11
Ccdc56	6.04563e-19	0.155051	0.166	0.089	6.28262e-15
jtb	3.0774e-11	0.155047	0.181	0.118	3.19803e-07
CG6084	6.20514e-12	0.154469	0.834	0.762	6.44838e-08
MAPk-Ak2	9.81494e-12	0.154262	0.35	0.26	1.01997e-07
CG9248	1.79583e-13	0.153917	0.286	0.195	1.86623e-09
CG5903	1.12572e-10	0.153321	0.473	0.379	1.16985e-06
Cyt-c1	4.33764e-11	0.152873	0.516	0.42	4.50768e-07
poe	1.39519e-13	0.152059	0.295	0.204	1.44988e-09
CG10055	4.35631e-15	0.151867	0.272	0.179	4.52708e-11
SmB	3.47113e-15	0.151819	0.474	0.358	3.6072e-11
Uch	2.10992e-10	0.151807	0.407	0.315	2.19263e-06
CG4038	2.24896e-11	0.150776	0.483	0.379	2.33712e-07
UbcE2H	1.11874e-12	0.150332	0.31	0.22	1.16259e-08
Rpn13	1.17566e-09	0.150239	0.372	0.291	1.22174e-05
CG17574	2.09274e-11	0.150024	0.732	0.625	2.17478e-07
shep	5.24227e-08	-0.150011	0.892	0.872	0.000544777
CG34232	0.0210433	-0.150551	0.251	0.272	1
EcR	0.0013777	-0.150883	0.133	0.164	1
CG17896	5.32947e-06	-0.151345	0.516	0.548	0.0553838
mt:ND5	2.75533e-07	-0.151744	0.854	0.868	0.00286334
Klp67A	5.48508e-09	-0.151935	0.042	0.091	5.70009e-05
Pabp2	0.00711437	-0.152459	0.349	0.369	1
NimB1	0.0167252	-0.152649	0.303	0.317	1
Patronin	0.000519191	-0.152963	0.165	0.202	1
jim	4.17239e-05	-0.153743	0.125	0.166	0.433595
CG1910	0.000441674	-0.153907	0.494	0.513	1
LanA	5.03894e-10	-0.154034	0.672	0.745	5.23647e-06
Svil	0.000462308	-0.154092	0.174	0.213	1
eIF4H1	7.73746e-06	-0.154266	0.466	0.518	0.0804077
Claspin	0.000140129	-0.154687	0.087	0.122	1
gw	0.000557017	-0.155252	0.319	0.356	1
Rab35	0.00572391	-0.155382	0.399	0.413	1
Vha100-2	0.000512358	-0.156001	0.338	0.371	1
fzy	4.03149e-07	-0.156566	0.067	0.113	0.00418952
CG34437	4.45654e-07	-0.156723	0.569	0.618	0.00463124
CG12702	1.81246e-09	-0.157146	0.036	0.084	1.8835e-05
Col4a1	2.34016e-09	-0.157266	0.591	0.679	2.43189e-05
mt:ND1	4.89234e-09	-0.158793	0.884	0.881	5.08412e-05
Mink	1.41321e-07	-0.159449	0.08	0.131	0.00146861
mamo	0.0016302	-0.160518	0.448	0.461	1
mys	0.381287	-0.16087	0.503	0.473	1
Klp10A	0.00053509	-0.161127	0.164	0.199	1
RnrS	2.10323e-05	-0.161944	0.194	0.247	0.218568
l(3)05822	0.00301008	-0.162132	0.291	0.319	1
GlcAT-P	0.000563391	-0.162832	0.399	0.43	1
Caf1-180	6.04446e-07	-0.16289	0.071	0.117	0.0062814
CG3328	0.000370634	-0.163541	0.203	0.243	1
NimC1	0.353889	-0.164115	0.22	0.221	1
Treh	0.408481	-0.164592	0.187	0.191	1
Syn1	2.80493e-09	-0.164657	0.039	0.088	2.91488e-05
kuk	0.000810886	-0.165199	0.25	0.282	1
Tig	1.84888e-05	-0.16574	0.495	0.54	0.192135
gb	0.00158628	-0.165791	0.21	0.242	1
Mmp2	9.77765e-05	-0.165961	0.06	0.092	1
Swip-1	0.000856503	-0.166077	0.497	0.495	1
Nepl20	0.000204236	-0.166465	0.234	0.278	1
CG43110	0.0923865	-0.166523	0.148	0.164	1
Idgf6	7.88437e-14	-0.166616	0.921	0.938	8.19343e-10
Myb	2.04959e-05	-0.166617	0.176	0.224	0.212994
Galphaq	2.16588e-05	-0.166661	0.322	0.373	0.225078
His2Av	3.30475e-08	-0.16688	0.69	0.71	0.00034343
ben	3.20027e-05	-0.166942	0.493	0.53	0.332572
Chc	0.000405139	-0.167029	0.523	0.54	1
SppL	4.14573e-05	-0.167491	0.122	0.162	0.430824
glu	5.18288e-05	-0.167746	0.118	0.157	0.538605
Oat	9.11926e-06	-0.167808	0.151	0.199	0.0947674
asRNA:CR46093	1.72436e-05	-0.16791	0.027	0.056	0.179196
kar	4.45117e-05	-0.168023	0.084	0.122	0.462565
UGP	0.000274264	-0.168405	0.193	0.232	1
CG7920	4.96054e-06	-0.168411	0.263	0.319	0.0515499
Men	5.41984e-08	-0.168445	0.572	0.478	0.00056323
borr	4.29339e-06	-0.168709	0.101	0.147	0.0446169
CG17544	0.00199875	-0.169264	0.29	0.316	1
sip2	1.75934e-10	-0.169553	0.057	0.117	1.82831e-06
Chrac-16	1.69343e-05	-0.169662	0.08	0.12	0.175981
Mcm7	4.32809e-07	-0.169673	0.1	0.153	0.00449775
CG6236	0.00744817	-0.169937	0.339	0.357	1
CG9436	2.17894e-07	-0.17003	0.118	0.175	0.00226436
CG14629	1.39538e-10	-0.170414	0.859	0.878	1.45008e-06
CG6650	4.46069e-05	-0.170611	0.137	0.18	0.463555
HDAC1	0.000124293	-0.171185	0.128	0.167	1
lap	0.00236496	-0.171312	0.226	0.255	1
Vap33	5.17476e-07	-0.172227	0.468	0.529	0.00537761
Jupiter	3.19917e-05	-0.173631	0.615	0.624	0.332458
CG4829	0.000162283	-0.174167	0.319	0.363	1
ATPsynbeta	7.20707e-07	-0.174343	0.444	0.493	0.00748959
LpR2	0.00076974	-0.175054	0.532	0.553	1
Ubx	2.706e-11	-0.175172	0.595	0.674	2.81208e-07
Gel	3.89055e-05	-0.17518	0.622	0.625	0.404306
ena	1.12569e-05	-0.175182	0.293	0.349	0.116982
TRAM	0.000360767	-0.175616	0.382	0.411	1
CG10469	0.110873	-0.175819	0.078	0.091	1
VhaAC45	1.87819e-05	-0.176394	0.53	0.565	0.195181
CG34331	1.46265e-12	-0.17652	0.641	0.723	1.51998e-08
wdb	2.15919e-05	-0.17658	0.31	0.356	0.224383
CG1092	2.61022e-10	-0.176803	0.576	0.654	2.71254e-06
Catsup	0.000137936	-0.177024	0.423	0.448	1
sle	6.00796e-06	-0.177035	0.292	0.34	0.0624347
cv-d	1.41615e-05	-0.178154	0.421	0.467	0.147167
Tgi	5.45683e-06	-0.178334	0.169	0.222	0.0567073
dpr17	0.0466375	-0.17892	0.096	0.111	1
RhoGAP92B	0.00132806	-0.179931	0.3	0.33	1
Glt	4.53094e-13	-0.179947	0.692	0.787	4.70855e-09
Idgf1	0.00199893	-0.180157	0.37	0.392	1
mt:lrRNA	1.37558e-16	-0.180172	1	1	1.42951e-12
Pvr	3.34344e-05	-0.180691	0.326	0.367	0.34745
Tudor-SN	1.30955e-06	-0.181208	0.566	0.59	0.0136088
CG10863	1.00176e-05	-0.182746	0.365	0.412	0.104103
vir-1	5.51515e-10	-0.182778	0.576	0.657	5.73134e-06
Eb1	2.64472e-05	-0.183257	0.478	0.501	0.27484
stai	1.8328e-09	-0.183352	0.027	0.072	1.90465e-05
CG10932	1.82704e-05	-0.185206	0.279	0.327	0.189866
SMC2	5.0847e-10	-0.185587	0.073	0.134	5.28402e-06
svr	8.93006e-06	-0.185625	0.412	0.454	0.0928012
hoe1	5.53182e-07	-0.186119	0.072	0.119	0.00574867
TwdlE	0.000960493	-0.18617	0.135	0.169	1
Klp61F	2.58131e-10	-0.186534	0.066	0.128	2.68249e-06
Syp	1.06885e-13	-0.186547	0.722	0.773	1.11075e-09
Rrp1	2.91116e-06	-0.187507	0.174	0.227	0.0302527
Sesn	0.000116782	-0.187824	0.223	0.264	1
fmt	0.00488015	-0.188268	0.596	0.597	1
Gal	0.000907386	-0.188376	0.13	0.162	1
TM4SF	6.96842e-07	-0.189182	0.06	0.104	0.00724158
sigmar	5.00791e-05	-0.190275	0.197	0.24	0.520422
dUTPase	0.000229593	-0.190388	0.417	0.436	1
Mcm6	9.68146e-08	-0.190479	0.073	0.122	0.0010061
rin	3.60111e-10	-0.194739	0.635	0.662	3.74227e-06
drpr	9.56751e-07	-0.194887	0.251	0.311	0.00994256
Ctr1A	0.0596603	-0.195084	0.192	0.21	1
CG10602	0.0613761	-0.196248	0.267	0.278	1
fdl	4.02819e-05	-0.196735	0.289	0.333	0.41861
cmet	6.97839e-13	-0.19714	0.046	0.11	7.25194e-09
cher	0.000103215	-0.198464	0.542	0.556	1
CG10512	2.44356e-07	-0.198679	0.458	0.504	0.00253935
Ts	5.76053e-08	-0.198788	0.14	0.202	0.000598634
pav	1.84176e-10	-0.199311	0.055	0.112	1.91396e-06
Had2	8.22618e-10	-0.199549	0.404	0.483	8.54865e-06
Fkbp59	0.0896012	-0.19995	0.175	0.191	1
Cks30A	1.20203e-13	-0.199993	0.062	0.136	1.24915e-09
Sec61alpha	1.47986e-09	-0.201383	0.657	0.692	1.53787e-05
Sodh-2	4.71638e-05	-0.20417	0.257	0.297	0.490126
CG8501	2.39581e-14	-0.204781	0.58	0.695	2.48973e-10
Ser	1.06513e-10	-0.205463	0.042	0.098	1.10689e-06
Pgant9	2.6594e-08	-0.207933	0.342	0.408	0.000276365
CG15093	1.26334e-08	-0.208182	0.516	0.557	0.000131286
RapGAP1	0.0110136	-0.20976	0.401	0.421	1
Incenp	4.65272e-11	-0.210008	0.091	0.16	4.83511e-07
lncRNA:roX2	1.70496e-10	-0.210605	0.104	0.175	1.77179e-06
PPO3	0.344697	-0.210879	0.047	0.052	1
ct	5.1533e-08	-0.211024	0.494	0.542	0.000535531
Pxn	4.35661e-17	-0.211505	0.699	0.803	4.52739e-13
chinmo	7.40673e-11	-0.214751	0.621	0.654	7.69708e-07
Ppn	1.45253e-18	-0.215267	0.858	0.904	1.50947e-14
28SrRNA-Psi:CR40741	0.0544088	-0.216117	0.142	0.159	1
alc	2.03565e-06	-0.216886	0.344	0.39	0.0211545
spz	1.72075e-13	-0.218954	0.751	0.783	1.78821e-09
mew	9.08245e-08	-0.219476	0.098	0.151	0.000943849
fabp	3.40969e-09	-0.22019	0.212	0.289	3.54335e-05
mud	2.31363e-12	-0.220537	0.059	0.126	2.40433e-08
Glut4EF	7.52318e-06	-0.22449	0.168	0.215	0.0781809
lncRNA:CR44316	0.0167781	-0.224889	0.163	0.133	1
fat-spondin	5.40529e-11	-0.225924	0.458	0.541	5.61718e-07
Meltrin	4.65476e-06	-0.226452	0.49	0.544	0.0483723
geminin	1.11867e-07	-0.227117	0.249	0.31	0.00116253
ed	9.65296e-11	-0.227242	0.112	0.182	1.00314e-06
Vamp7	8.06183e-09	-0.227702	0.321	0.393	8.37785e-05
hdc	8.98703e-10	-0.22855	0.605	0.632	9.33932e-06
Gip	0.146512	-0.229732	0.19	0.201	1
LanB1	1.97562e-21	-0.230723	0.807	0.86	2.05307e-17
Orct	5.55432e-10	-0.231842	0.081	0.143	5.77205e-06
l(1)G0289	6.64751e-11	-0.233418	0.502	0.562	6.90809e-07
Nrt	4.96112e-06	-0.237463	0.099	0.143	0.0515559
CG31337	6.81306e-22	-0.238998	0.674	0.76	7.08013e-18
mthl2	0.000195947	-0.243636	0.422	0.445	1
pre-rRNA:CR45845	0.100214	-0.243755	0.502	0.519	1
ncd	6.5828e-16	-0.244418	0.065	0.148	6.84085e-12
Msp300	4.9532e-18	-0.24497	0.87	0.887	5.14736e-14
28SrRNA-Psi:CR45860	0.0614181	-0.246272	0.109	0.124	1
nAChRbeta3	1.26047e-14	-0.24641	0.544	0.62	1.30988e-10
aurB	2.22772e-13	-0.247516	0.088	0.165	2.31504e-09
CG15211	2.25575e-09	-0.247979	0.445	0.495	2.34418e-05
rgn	6.49779e-07	-0.249807	0.097	0.145	0.0067525
CecB	0.00926873	-0.250518	0.062	0.082	1
CG42232	1.23231e-09	-0.251146	0.179	0.248	1.28062e-05
Jheh2	1.34526e-09	-0.251195	0.272	0.34	1.39799e-05
28SrRNA-Psi:CR45851	0.054932	-0.252171	0.285	0.303	1
Gdh	4.00156e-16	-0.252454	0.618	0.68	4.15842e-12
lectin-28C	1.76343e-12	-0.254547	0.572	0.641	1.83256e-08
tum	2.76466e-14	-0.259347	0.084	0.164	2.87303e-10
CG5854	2.39941e-08	-0.260024	0.36	0.418	0.000249346
sty	2.56197e-23	-0.262072	0.674	0.746	2.66239e-19
eater	6.36501e-16	-0.27128	0.542	0.624	6.61451e-12
pre-rRNA:CR45846	0.189753	-0.276735	0.35	0.359	1
CG2444	1.57654e-14	-0.27998	0.069	0.147	1.63834e-10
mmy	7.05518e-11	-0.280277	0.334	0.406	7.33175e-07
Atox1	0.213479	-0.280488	0.351	0.357	1
pre-rRNA:CR45847	0.10537	-0.289372	0.351	0.364	1
28SrRNA:CR45844	0.0477661	-0.289801	0.296	0.313	1
jumu	3.08849e-16	-0.293002	0.061	0.145	3.20956e-12
28SrRNA-Psi:CR40596	2.18387e-06	-0.298124	0.415	0.462	0.0226948
NimB4	2.93615e-15	-0.299424	0.573	0.635	3.05125e-11
CG7860	0.007432	-0.299631	0.042	0.06	1
28SrRNA:CR45837	0.00204807	-0.303629	0.164	0.197	1
NtR	4.08607e-24	-0.30365	0.538	0.66	4.24624e-20
Tis11	7.22655e-21	-0.304201	0.575	0.66	7.50984e-17
Sr-CI	1.90856e-27	-0.305076	0.677	0.762	1.98337e-23
Prip	5.38917e-33	-0.305517	0.732	0.806	5.60042e-29
CG1640	4.44599e-15	-0.305526	0.192	0.287	4.62027e-11
br	2.16427e-15	-0.312359	0.212	0.315	2.24911e-11
CG3902	1.24635e-16	-0.314526	0.243	0.347	1.2952e-12
CecA1	0.708415	-0.314651	0.095	0.094	1
Hml	7.23929e-37	-0.315287	0.84	0.909	7.52307e-33
CG5397	1.81337e-22	-0.320551	0.449	0.578	1.88446e-18
CG31324	2.33873e-16	-0.321341	0.544	0.616	2.43041e-12
28SrRNA-Psi:CR45848	4.76258e-05	-0.328468	0.108	0.147	0.494928
Mtk	0.297468	-0.32899	0.285	0.27	1
CG43175	0.637431	-0.330904	0.259	0.25	1
Prosap	5.48294e-26	-0.334491	0.483	0.601	5.69787e-22
CecA2	0.373366	-0.33641	0.133	0.12	1
Inos	3.80324e-20	-0.341498	0.586	0.68	3.95233e-16
Df31	2.17367e-30	-0.341636	0.782	0.847	2.25888e-26
CycB	4.45923e-20	-0.346333	0.074	0.174	4.63403e-16
CG9372	1.45989e-25	-0.350546	0.449	0.572	1.51711e-21
18SrRNA-Psi:CR41602	0.0250273	-0.350721	0.445	0.451	1
polo	5.80373e-20	-0.37096	0.105	0.212	6.03123e-16
scra	3.97342e-18	-0.372547	0.117	0.219	4.12918e-14
CG33225	0.0439762	-0.379656	0.2	0.213	1
pre-rRNA:CR45856	0.0397976	-0.38844	0.309	0.33	1
lncRNA:roX1	3.01841e-27	-0.390786	0.352	0.506	3.13673e-23
lectin-24Db	6.63607e-26	-0.413023	0.376	0.501	6.89621e-22
18SrRNA:CR41548	0.0209831	-0.449307	0.257	0.276	1
18SrRNA:CR45838	0.0131073	-0.463118	0.252	0.274	1
18SrRNA:CR45841	0.0124593	-0.469145	0.248	0.27	1
stg	6.60625e-30	-0.469303	0.257	0.409	6.86522e-26
18SrRNA-Psi:CR45861	0.00642543	-0.478354	0.199	0.224	1
CecC	0.0106822	-0.487145	0.181	0.202	1
Pen	1.66889e-36	-0.496014	0.339	0.501	1.73431e-32
regucalcin	3.97528e-93	-0.529513	0.909	0.967	4.13112e-89
CG42807	3.07577e-33	-0.591496	0.439	0.582	3.19634e-29
alphaTub85E	1.17571e-05	-0.664575	0.199	0.246	0.122179
atilla	0.0328189	-0.688065	0.061	0.076	1
MtnA	0.144989	-0.719755	0.321	0.288	1
CG10467	0.00623482	-0.722027	0.083	0.106	1
betaTub60D	0.00881602	-0.889309	0.067	0.087	1
fok	0.0349294	-1.009	0.085	0.102	1
PPO1	0.375275	-1.23112	0.207	0.214	1
PPO2	0.24618	-1.23463	0.272	0.283	1

## Sheet: PM6
gene	cluster10.p_val	cluster10.avg_logFC	cluster10.pct.1	cluster10.pct.2	cluster10.p_val_adj
CecA2	0	2.04688	0.658	0.107	0
Ance	7.48334e-118	1.56956	0.838	0.545	7.77668e-114
IM18	0	1.41272	0.562	0.07	0
CecC	1.01452e-239	1.3784	0.76	0.186	1.05429e-235
lncRNA:CR43855	8.55072e-97	1.36378	0.802	0.572	8.88591e-93
CecA1	1.57251e-278	1.35781	0.548	0.082	1.63416e-274
Tep4	4.14564e-122	1.16122	0.856	0.54	4.30815e-118
NK7.1	4.54751e-305	1.11893	0.636	0.107	4.72577e-301
CG42566	7.48204e-136	1.02513	0.928	0.571	7.77533e-132
Mtk	0.00585913	0.96825	0.29	0.27	1
CG6023	0	0.965666	0.444	0.045	0
CG33225	1.42344e-138	0.9627	0.658	0.201	1.47924e-134
CG2865	1.9591e-118	0.920457	0.796	0.367	2.0359e-114
Gdap2	7.42398e-199	0.902206	0.582	0.126	7.715e-195
CG6006	1.26481e-125	0.875984	0.538	0.148	1.31439e-121
Psc	1.02592e-99	0.862537	0.658	0.272	1.06613e-95
Jra	7.38171e-99	0.861104	0.774	0.395	7.67108e-95
Lip4	2.29718e-207	0.859316	0.472	0.079	2.38723e-203
Dro	4.68593e-91	0.85412	0.278	0.056	4.86962e-87
CG44250	8.2268e-120	0.85215	0.616	0.197	8.54929e-116
CG5953	8.35985e-174	0.841249	0.658	0.176	8.68756e-170
CG42394	9.43986e-66	0.810358	0.86	0.621	9.8099e-62
Rel	1.85635e-115	0.802311	0.826	0.38	1.92912e-111
LamC	2.05663e-101	0.797875	0.75	0.339	2.13725e-97
CG3348	3.1141e-103	0.789486	0.56	0.176	3.23617e-99
rgn	6.22135e-93	0.769837	0.452	0.134	6.46523e-89
CG43210	1.98653e-120	0.760653	0.702	0.245	2.0644e-116
Nrt	5.17725e-156	0.746326	0.552	0.129	5.3802e-152
asRNA:CR46093	1.75932e-148	0.73467	0.314	0.047	1.82828e-144
Gclc	2.03723e-126	0.732717	0.644	0.204	2.11709e-122
CAP	4.43451e-180	0.728222	0.556	0.12	4.60834e-176
Ets21C	1.25881e-107	0.713383	0.888	0.416	1.30816e-103
Mmp1	9.72496e-93	0.709756	0.71	0.302	1.01062e-88
lncRNA:CR40469	4.75297e-95	0.694999	0.794	0.371	4.93929e-91
CG8177	1.64315e-94	0.668015	0.758	0.336	1.70756e-90
puc	6.05836e-80	0.663649	0.678	0.303	6.29585e-76
CG8157	6.24912e-38	0.659797	0.92	0.796	6.49408e-34
prage	1.57551e-144	0.658823	0.578	0.149	1.63727e-140
Lst	6.17435e-202	0.613824	0.348	0.043	6.41639e-198
CecB	1.89133e-74	0.612758	0.304	0.075	1.96547e-70
PGRP-LB	5.81808e-147	0.595069	0.396	0.073	6.04615e-143
bin3	1.12913e-62	0.560396	0.664	0.307	1.17339e-58
shrb	8.24651e-61	0.559043	0.754	0.43	8.56977e-57
chn	2.49436e-126	0.551432	0.53	0.136	2.59214e-122
loco	2.06792e-76	0.549815	0.672	0.281	2.14898e-72
Spn55B	2.51305e-93	0.547731	0.55	0.179	2.61156e-89
Nph	2.59517e-64	0.533002	0.818	0.463	2.6969e-60
CG13160	6.59626e-304	0.528766	0.332	0.026	6.85483e-300
vib	1.59293e-66	0.527087	0.74	0.371	1.65537e-62
sesB	1.444e-43	0.523228	0.946	0.88	1.5006e-39
Su(dx)	2.42419e-91	0.517597	0.564	0.186	2.51922e-87
RpL9	1.9075e-50	0.507959	0.956	0.915	1.98228e-46
zfh1	6.5178e-66	0.502565	0.974	0.758	6.77329e-62
mthl6	1.82231e-88	0.497649	0.548	0.18	1.89374e-84
Mp	2.37783e-204	0.49637	0.37	0.049	2.47104e-200
CG5346	4.31582e-64	0.495728	0.574	0.242	4.485e-60
stv	3.14702e-158	0.491299	0.396	0.07	3.27038e-154
mod	1.32868e-53	0.48963	0.8	0.481	1.38076e-49
CNBP	1.13733e-54	0.487825	0.984	0.903	1.18191e-50
CG10376	2.1093e-96	0.487159	0.586	0.191	2.19199e-92
crc	1.72757e-65	0.485341	0.888	0.505	1.79529e-61
Nedd4	6.76051e-76	0.483661	0.586	0.223	7.02553e-72
CG13868	1.44871e-63	0.4758	0.618	0.264	1.5055e-59
IP3K2	3.14406e-98	0.474007	0.392	0.096	3.26731e-94
CG11236	7.51859e-214	0.468059	0.362	0.044	7.81332e-210
IP3K1	8.06513e-58	0.463922	0.524	0.206	8.38128e-54
Drs	8.74054e-06	0.462227	0.278	0.205	0.0908317
CG42674	1.283e-52	0.460705	0.562	0.251	1.33329e-48
Baldspot	5.9511e-56	0.456754	0.848	0.491	6.18438e-52
shn	9.71593e-74	0.454722	0.484	0.164	1.00968e-69
tara	1.72163e-83	0.451491	0.434	0.129	1.78912e-79
kra	4.91266e-49	0.451047	0.88	0.646	5.10523e-45
Df31	1.44142e-56	0.448309	0.96	0.84	1.49792e-52
Gprk2	1.88032e-68	0.445545	0.564	0.216	1.95403e-64
GstO3	1.93059e-46	0.444746	0.834	0.541	2.00627e-42
nop5	1.35344e-58	0.442171	0.722	0.354	1.40649e-54
CG12112	2.9808e-78	0.440611	0.576	0.206	3.09765e-74
CrebB	4.89141e-65	0.440498	0.586	0.237	5.08315e-61
Alh	5.10921e-76	0.432159	0.506	0.172	5.30949e-72
Dyak-FK506-bp2	6.07731e-37	0.430757	0.68	0.382	6.31554e-33
CG32066	1.37862e-64	0.429693	0.654	0.279	1.43267e-60
RpL18	6.67392e-36	0.426886	0.988	0.942	6.93553e-32
ITP	2.08817e-89	0.425577	0.496	0.147	2.17002e-85
sea	1.04499e-55	0.425161	0.696	0.32	1.08596e-51
CG33460	3.65218e-47	0.423387	0.7	0.345	3.79534e-43
RpS18	1.9687e-44	0.41565	0.992	0.927	2.04588e-40
CG5004	2.09797e-66	0.415065	0.524	0.193	2.18021e-62
CG14253	2.34485e-45	0.414946	0.802	0.477	2.43676e-41
GstD3	6.64166e-52	0.413934	0.782	0.399	6.90201e-48
RpS14b	3.39063e-39	0.40905	0.882	0.716	3.52355e-35
CG45050	3.04171e-47	0.408743	0.928	0.726	3.16094e-43
RpL30	1.30188e-42	0.405965	0.964	0.93	1.35291e-38
hoip	3.77255e-49	0.40508	0.728	0.385	3.92044e-45
Swim	8.98957e-203	0.40191	0.302	0.032	9.34196e-199
Adgf-A	4.69684e-53	0.397103	0.768	0.386	4.88095e-49
RpS4	4.16413e-53	0.390028	0.992	0.971	4.32736e-49
PRL-1	3.69542e-54	0.385583	0.71	0.331	3.84028e-50
RpL13	5.12278e-47	0.381169	0.982	0.965	5.3236e-43
CG10433	2.89099e-194	0.38019	0.302	0.034	3.00431e-190
spin	8.92317e-51	0.379862	0.728	0.357	9.27296e-47
CG6299	1.59372e-86	0.379387	0.412	0.112	1.65619e-82
RpS12	4.59473e-32	0.379002	0.99	0.951	4.77485e-28
RpS6	3.45479e-41	0.378057	0.982	0.963	3.59022e-37
Gapdh2	3.62779e-47	0.376065	0.792	0.462	3.77e-43
pirk	6.20245e-57	0.374124	0.532	0.206	6.44559e-53
Dbp80	3.37117e-50	0.373166	0.674	0.319	3.50332e-46
GILT3	2.94085e-78	0.37145	0.486	0.152	3.05613e-74
Chmp1	1.52439e-41	0.368642	0.706	0.382	1.58415e-37
Nc73EF	1.45569e-61	0.368304	0.546	0.213	1.51275e-57
InR	8.64745e-64	0.36711	0.426	0.142	8.98643e-60
CG8545	4.24822e-60	0.366355	0.526	0.201	4.41475e-56
Arc1	2.81442e-35	0.364571	0.83	0.546	2.92475e-31
CG31174	3.55741e-71	0.364351	0.24	0.052	3.69686e-67
l(2)gl	1.48295e-49	0.364103	0.618	0.286	1.54108e-45
RhoGAP18B	5.42295e-57	0.363488	0.588	0.244	5.63553e-53
Cyt-c-p	2.20799e-41	0.359746	0.848	0.521	2.29454e-37
mys	1.76349e-51	0.359362	0.828	0.466	1.83262e-47
RpS26	6.06255e-40	0.358066	0.992	0.965	6.3002e-36
vig	1.15022e-42	0.357974	0.83	0.5	1.19531e-38
RpS29	6.26919e-63	0.356465	0.992	0.983	6.51495e-59
CG30269	5.56188e-101	0.354903	0.362	0.08	5.7799e-97
Dyak-FKBP59	6.78122e-48	0.352608	0.556	0.243	7.04705e-44
kraken	6.68023e-60	0.352332	0.418	0.144	6.9421e-56
NHP2	6.90007e-49	0.351681	0.644	0.297	7.17055e-45
lncRNA:CR45018	7.9922e-30	0.34859	0.776	0.49	8.30549e-26
CG6767	1.71138e-49	0.348311	0.606	0.274	1.77847e-45
Lis-1	7.83919e-51	0.347597	0.564	0.246	8.14649e-47
RpL11	6.81117e-53	0.347138	0.998	0.98	7.07817e-49
RpL28	4.58306e-36	0.346871	0.986	0.969	4.76272e-32
pst	1.46691e-43	0.34657	0.662	0.324	1.52442e-39
RpL36	3.84785e-35	0.346215	0.988	0.961	3.99869e-31
CG46385	3.90705e-44	0.34547	0.75	0.379	4.06021e-40
kis	4.46776e-35	0.344311	0.684	0.388	4.64289e-31
RpL6	6.13474e-51	0.344246	0.998	0.977	6.37522e-47
NimB1	1.17415e-38	0.34408	0.606	0.308	1.22017e-34
gem	7.13215e-49	0.339295	0.556	0.238	7.41173e-45
sle	9.91522e-46	0.339026	0.686	0.328	1.03039e-41
Su(var)205	2.26413e-29	0.335445	0.734	0.457	2.35289e-25
CG15611	2.25807e-63	0.335427	0.536	0.198	2.34658e-59
awd	1.16337e-31	0.335196	0.986	0.944	1.20898e-27
CG42542	5.25077e-48	0.334552	0.548	0.238	5.4566e-44
RpS10b	4.79809e-45	0.333265	0.986	0.978	4.98617e-41
bic	1.81636e-47	0.332332	0.98	0.899	1.88756e-43
RpL22	4.3492e-39	0.331109	0.968	0.772	4.51969e-35
CHMP2B	1.29616e-60	0.32935	0.496	0.181	1.34697e-56
Pino	1.31976e-77	0.32835	0.336	0.085	1.37149e-73
CG11357	4.47859e-35	0.327093	0.718	0.407	4.65415e-31
drk	1.09888e-44	0.326147	0.704	0.349	1.14196e-40
RpL24	2.32337e-57	0.326138	0.994	0.98	2.41444e-53
Hsc70Cb	3.15363e-30	0.325812	0.74	0.459	3.27725e-26
cv-c	1.68705e-81	0.324462	0.378	0.099	1.75318e-77
Nlp	1.06761e-35	0.324417	0.902	0.692	1.10946e-31
eIF5B	3.47027e-36	0.32405	0.686	0.368	3.60631e-32
CG8026	1.04019e-75	0.32374	0.332	0.086	1.08096e-71
lost	5.97016e-31	0.322217	0.902	0.756	6.20419e-27
Glut4EF	1.09226e-49	0.322027	0.508	0.204	1.13508e-45
corto	3.9617e-50	0.321611	0.536	0.222	4.117e-46
Irk1	2.2263e-43	0.32106	0.558	0.246	2.31358e-39
RhoGAP71E	1.3776e-36	0.320754	0.682	0.365	1.4316e-32
rho-4	8.50778e-77	0.319396	0.376	0.104	8.84129e-73
Uhg5	3.48102e-64	0.319309	0.418	0.135	3.61748e-60
RpS11	3.09124e-53	0.319233	0.998	0.987	3.21241e-49
CD98hc	5.93677e-34	0.318283	0.704	0.403	6.16949e-30
Nmdmc	1.83811e-47	0.318048	0.478	0.194	1.91016e-43
CG5399	2.21357e-34	0.317893	0.568	0.289	2.30034e-30
CG10103	4.27485e-49	0.317462	0.53	0.223	4.44243e-45
RpS3A	1.05704e-55	0.317169	1	0.986	1.09848e-51
CG4250	7.17615e-40	0.312333	0.978	0.787	7.45745e-36
Nhe3	9.46734e-61	0.311701	0.414	0.138	9.83846e-57
eIF3k	9.37379e-28	0.309403	0.782	0.522	9.74124e-24
vari	1.97367e-47	0.307924	0.494	0.203	2.05104e-43
Akap200	1.41941e-31	0.307791	0.814	0.496	1.47505e-27
drongo	1.61387e-45	0.307741	0.514	0.219	1.67713e-41
sgg	3.42622e-32	0.306582	0.778	0.463	3.56053e-28
Pak3	1.43553e-34	0.306521	0.752	0.434	1.4918e-30
lncRNA:CR43900	1.29634e-51	0.30609	0.282	0.084	1.34716e-47
Su(z)2	2.45399e-79	0.305991	0.36	0.093	2.55019e-75
viaf	2.92209e-38	0.30588	0.612	0.305	3.03664e-34
Adk2	2.79643e-31	0.304096	0.786	0.506	2.90605e-27
ssp2	1.21654e-67	0.303607	0.392	0.118	1.26422e-63
Uhg2	2.53599e-51	0.301146	0.432	0.161	2.6354e-47
Ac76E	1.29687e-149	0.300068	0.264	0.033	1.34771e-145
La	4.86652e-33	0.298902	0.626	0.339	5.05729e-29
RpL37A	7.10841e-57	0.298543	0.998	0.991	7.38706e-53
RpL14	1.58799e-32	0.298161	0.992	0.977	1.65024e-28
SF2	2.96031e-28	0.298033	0.812	0.514	3.07636e-24
RpS24	1.93342e-50	0.296737	0.996	0.979	2.00921e-46
dpr17	3.30419e-25	0.296525	0.258	0.107	3.43371e-21
chinmo	1.35588e-25	0.29405	0.876	0.646	1.40903e-21
Rm62	1.48561e-28	0.293795	0.856	0.601	1.54385e-24
lncRNA:CR45973	8.60873e-78	0.29284	0.226	0.044	8.94619e-74
RpS3	1.58394e-48	0.292402	0.988	0.973	1.64603e-44
mnd	9.97161e-30	0.29068	0.586	0.314	1.03625e-25
Mapmodulin	4.09399e-30	0.290555	0.8	0.497	4.25447e-26
Dyak-Scsalpha	1.22601e-38	0.288373	0.546	0.249	1.27407e-34
ZnT63C	8.25836e-40	0.287847	0.546	0.253	8.58209e-36
Tim10	8.00925e-48	0.285882	0.528	0.219	8.32321e-44
Nop60B	7.89803e-30	0.285856	0.726	0.429	8.20764e-26
CG5535	1.14373e-70	0.28461	0.348	0.096	1.18856e-66
CG8112	2.44688e-49	0.284361	0.402	0.147	2.5428e-45
CG9253	2.50292e-45	0.284113	0.506	0.213	2.60103e-41
CG13096	1.61171e-38	0.283251	0.558	0.263	1.67489e-34
CG6937	1.29158e-54	0.282754	0.462	0.169	1.34221e-50
RpL31	5.1543e-33	0.282629	0.986	0.963	5.35635e-29
RpL15	9.29676e-54	0.281953	0.998	0.992	9.66119e-50
CG1890	4.53868e-26	0.281814	0.802	0.537	4.7166e-22
Sam-S	8.78126e-39	0.280954	0.756	0.408	9.12548e-35
tacc	3.35538e-36	0.280364	0.602	0.297	3.48691e-32
RpS20	5.54531e-46	0.279961	0.998	0.985	5.76269e-42
CG11267	5.24377e-25	0.279283	0.86	0.629	5.44933e-21
Rtnl1	2.64401e-25	0.277993	0.89	0.67	2.74766e-21
sd	4.78161e-42	0.275737	0.586	0.266	4.96905e-38
28SrRNA-Psi:CR45859	3.06232e-37	0.275685	0.64	0.329	3.18236e-33
RpL12	3.07477e-52	0.273035	0.998	0.986	3.1953e-48
vri	1.46843e-79	0.271602	0.292	0.066	1.52599e-75
RpS21	2.24942e-29	0.271119	0.982	0.959	2.33759e-25
Vps2	2.56766e-37	0.27099	0.602	0.292	2.66831e-33
CG12004	3.72224e-43	0.270533	0.53	0.231	3.86815e-39
RpL27A	6.29488e-37	0.269916	0.996	0.988	6.54163e-33
RpS8	4.87991e-56	0.269569	0.996	0.992	5.0712e-52
RpL18A	4.11942e-27	0.267934	0.99	0.963	4.2809e-23
RpS27A	3.5955e-45	0.267504	0.998	0.994	3.73644e-41
capu	2.50868e-37	0.264763	0.504	0.228	2.60702e-33
RpL35A	3.31767e-46	0.264288	0.996	0.976	3.44772e-42
olf186-M	1.18628e-27	0.264173	0.756	0.458	1.23278e-23
CG42245	2.33971e-58	0.263925	0.384	0.123	2.43142e-54
Nop56	9.99793e-35	0.261728	0.724	0.394	1.03899e-30
Ack-like	1.73334e-47	0.261663	0.434	0.165	1.80128e-43
RpL23	2.24767e-58	0.261602	0.998	0.991	2.33578e-54
lncRNA:CR46035	3.53065e-210	0.261557	0.154	0.007	3.66905e-206
Tgt	1.10797e-47	0.260971	0.328	0.111	1.15141e-43
Rack1	4.16872e-47	0.260524	0.996	0.961	4.33214e-43
lncRNA:CR42862	3.04618e-28	0.259953	0.674	0.391	3.16559e-24
His2Av	8.33638e-22	0.259949	0.914	0.703	8.66316e-18
RpL7	8.72466e-42	0.259486	0.998	0.977	9.06667e-38
CG7215	2.07794e-44	0.258053	0.556	0.234	2.15939e-40
RhoGEF3	2.52678e-41	0.257782	0.436	0.178	2.62583e-37
Npc2h	1.88885e-39	0.257281	0.314	0.113	1.96289e-35
larp	1.14191e-23	0.256587	0.676	0.4	1.18668e-19
Tre1	5.15217e-57	0.255746	0.34	0.104	5.35414e-53
Arc2	4.34476e-42	0.254373	0.432	0.173	4.51507e-38
Vago	1.0009e-161	0.254121	0.16	0.011	1.04013e-157
Gmap	8.12701e-33	0.25402	0.478	0.225	8.44559e-29
nudC	4.49363e-30	0.25247	0.578	0.299	4.66978e-26
yps	9.47726e-25	0.251833	0.816	0.55	9.84877e-21
gish	2.32502e-29	0.251597	0.666	0.356	2.41616e-25
eRF1	9.65655e-29	0.251052	0.61	0.33	1.00351e-24
JhI-21	7.10124e-48	0.25018	0.286	0.088	7.37961e-44
RpL21	1.62648e-34	0.250034	0.996	0.987	1.69023e-30
Hrb87F	5.43551e-26	0.249133	0.728	0.434	5.64858e-22
Vps28	3.49337e-38	0.248136	0.59	0.277	3.63031e-34
Rs1	2.91769e-43	0.248051	0.47	0.193	3.03206e-39
Set	4.87076e-31	0.247516	0.598	0.31	5.0617e-27
REG	6.39665e-28	0.246551	0.78	0.469	6.6474e-24
blw	3.90866e-30	0.245993	0.982	0.907	4.06188e-26
RpS13	7.04114e-27	0.245838	0.996	0.974	7.31715e-23
Hrb98DE	2.58698e-22	0.244732	0.71	0.454	2.68839e-18
CG31523	1.37723e-41	0.243882	0.502	0.216	1.43122e-37
RpL26	5.84664e-34	0.24356	0.998	0.988	6.07583e-30
Eglp4	2.86262e-36	0.242705	0.564	0.267	2.97483e-32
Tom40	5.16417e-36	0.24265	0.662	0.335	5.3666e-32
Keap1	1.67449e-49	0.242153	0.312	0.099	1.74013e-45
RpL41	2.49755e-54	0.241513	1	0.999	2.59546e-50
Pfdn5	1.55864e-27	0.24149	0.642	0.357	1.61974e-23
Pde8	2.97478e-35	0.24147	0.468	0.21	3.09139e-31
Prtl99C	1.82164e-120	0.241462	0.17	0.017	1.89305e-116
P32	2.04431e-35	0.24132	0.638	0.318	2.12445e-31
Lnk	1.99631e-40	0.241069	0.346	0.129	2.07457e-36
yellow-c	3.27774e-60	0.239232	0.138	0.022	3.40623e-56
ND-MNLL	1.21127e-39	0.239112	0.626	0.288	1.25875e-35
HEATR2	7.00882e-107	0.238753	0.212	0.03	7.28357e-103
RpLP0-like	1.28588e-38	0.238351	0.6	0.28	1.33629e-34
RpS5a	4.67895e-46	0.237612	0.998	0.991	4.86236e-42
RpL5	1.18036e-43	0.237485	0.998	0.979	1.22663e-39
lace	4.07588e-31	0.237374	0.586	0.298	4.23566e-27
cnc	1.17162e-24	0.237231	0.704	0.416	1.21755e-20
bif	6.50449e-27	0.236635	0.772	0.461	6.75946e-23
RpL32	6.33015e-23	0.235826	0.982	0.954	6.57829e-19
ATPsynC	5.48082e-21	0.234863	0.98	0.93	5.69567e-17
RpS9	2.77953e-31	0.234792	0.992	0.981	2.88849e-27
CG6051	1.86249e-59	0.234652	0.29	0.079	1.9355e-55
aqz	1.43679e-22	0.234198	0.976	0.871	1.49311e-18
RhoGAP16F	1.75233e-30	0.233106	0.672	0.36	1.82103e-26
CG4806	1.33128e-41	0.232663	0.41	0.16	1.38346e-37
CG15019	4.50898e-29	0.232505	0.57	0.296	4.68574e-25
CG6126	3.03078e-37	0.232504	0.458	0.199	3.14959e-33
RpL10Ab	9.48244e-44	0.232295	1	0.988	9.85416e-40
Pep	1.25412e-20	0.23224	0.716	0.453	1.30328e-16
Smg5	1.89711e-45	0.231492	0.416	0.159	1.97147e-41
CG5446	3.25303e-31	0.231281	0.668	0.346	3.38055e-27
jdp	1.08998e-59	0.231118	0.24	0.058	1.1327e-55
RpL10	6.45238e-42	0.230303	0.998	0.994	6.70531e-38
kay	5.59471e-32	0.229516	0.78	0.445	5.81402e-28
Csk	2.68498e-35	0.229134	0.424	0.182	2.79023e-31
bur	6.05409e-41	0.228622	0.51	0.219	6.29141e-37
RpL13A	1.20091e-36	0.228269	1	0.988	1.24799e-32
CG13631	5.10846e-23	0.227656	0.764	0.482	5.30871e-19
AttD	3.39989e-16	0.227019	0.088	0.027	3.53316e-12
RpL27	6.22582e-46	0.225583	0.998	0.992	6.46987e-42
Phb2	1.3997e-28	0.225255	0.642	0.345	1.45457e-24
RpL7A	1.73638e-32	0.2249	0.992	0.98	1.80445e-28
Dhap-at	4.19038e-55	0.224765	0.3	0.087	4.35465e-51
mew	6.21656e-44	0.22455	0.386	0.142	6.46024e-40
CG6115	5.11041e-25	0.22395	0.65	0.37	5.31074e-21
CCT2	3.32568e-21	0.223708	0.856	0.589	3.45605e-17
Cpr49Ac	0.0624989	0.223498	0.038	0.056	1
Tpi	1.02344e-51	0.223173	0.376	0.128	1.06356e-47
Prx3	1.70958e-30	0.223031	0.55	0.271	1.7766e-26
Shmt	1.1913e-39	0.221409	0.566	0.252	1.23799e-35
RpLP1	1.92673e-23	0.220667	0.998	0.991	2.00226e-19
CG43187	1.00653e-81	0.219878	0.192	0.031	1.04598e-77
CG7523	3.36641e-30	0.219707	0.49	0.239	3.49837e-26
r-l	1.23081e-37	0.21967	0.496	0.216	1.27905e-33
RASSF8	3.59696e-36	0.21897	0.386	0.158	3.73796e-32
GstE6	1.86764e-28	0.218881	0.756	0.43	1.94085e-24
Swip-1	5.50209e-25	0.218227	0.812	0.487	5.71777e-21
klu	1.43814e-43	0.217646	0.204	0.054	1.49451e-39
RpS19a	6.6179e-49	0.217367	0.998	0.992	6.87732e-45
cpa	2.23385e-21	0.216891	0.742	0.455	2.32142e-17
SCaMC	1.06557e-22	0.216644	0.764	0.466	1.10734e-18
CG14907	2.72711e-42	0.216444	0.376	0.141	2.83401e-38
CG18178	5.48364e-45	0.215558	0.406	0.152	5.6986e-41
Dif	1.28431e-41	0.214862	0.358	0.131	1.33465e-37
RpS17	1.9527e-29	0.214517	0.994	0.982	2.02925e-25
Vps24	1.03557e-35	0.21399	0.484	0.216	1.07617e-31
lncRNA:CR45640	4.96924e-54	0.213371	0.196	0.044	5.16403e-50
CkIIalpha	2.43014e-19	0.213238	0.648	0.398	2.5254e-15
RpL8	8.08915e-33	0.213044	0.998	0.982	8.40624e-29
CG42455	4.46741e-36	0.212598	0.48	0.21	4.64254e-32
Spn42Da	3.37795e-37	0.211829	0.392	0.159	3.51037e-33
CG14322	7.76454e-36	0.210983	0.244	0.08	8.06892e-32
Gadd45	1.64558e-19	0.210789	0.644	0.396	1.71009e-15
sta	2.60357e-26	0.210586	0.994	0.971	2.70563e-22
cpo	2.97405e-47	0.209988	0.284	0.087	3.09064e-43
DptB	2.25131e-23	0.209961	0.068	0.013	2.33956e-19
CG14906	1.30752e-41	0.209151	0.23	0.068	1.35877e-37
Fim	7.08772e-21	0.20884	0.692	0.431	7.36556e-17
baf	1.31857e-19	0.208401	0.756	0.487	1.37026e-15
CG10960	2.8691e-31	0.207703	0.506	0.242	2.98157e-27
Ns1	5.69691e-40	0.207259	0.406	0.16	5.92023e-36
tx	1.85681e-36	0.206927	0.308	0.112	1.9296e-32
MICAL-like	1.51811e-45	0.206441	0.392	0.144	1.57762e-41
vig2	4.83789e-20	0.206077	0.91	0.702	5.02754e-16
CG13159	6.78627e-145	0.205416	0.158	0.012	7.05229e-141
pho	5.37882e-34	0.204108	0.416	0.18	5.58967e-30
Ccdc56	8.028e-43	0.203971	0.278	0.089	8.3427e-39
par-1	3.91967e-22	0.202812	0.634	0.366	4.07332e-18
RpL40	2.92451e-27	0.202665	0.994	0.972	3.03916e-23
Galphai	8.61716e-26	0.202111	0.624	0.339	8.95496e-22
CG18659	1.78974e-33	0.20182	0.404	0.172	1.8599e-29
RpII18	6.38645e-24	0.201503	0.604	0.341	6.6368e-20
Cyp1	3.22075e-33	0.201294	0.988	0.985	3.34701e-29
Cad86C	4.69625e-94	0.201138	0.196	0.028	4.88035e-90
mt:Cyt-b	3.17407e-17	0.200879	0.968	0.897	3.29849e-13
CG5903	4.70806e-24	0.20032	0.664	0.378	4.89262e-20
Tep2	6.39983e-50	0.200245	0.216	0.055	6.6507e-46
QC	2.27828e-62	0.199523	0.176	0.033	2.36759e-58
RpL37a	3.26382e-36	0.199127	1	0.99	3.39177e-32
sra	7.54634e-36	0.199087	0.426	0.18	7.84216e-32
14-3-3zeta	9.78111e-24	0.19816	0.992	0.924	1.01645e-19
HmgZ	1.44558e-15	0.198038	0.934	0.732	1.50225e-11
RpLP2	1.52674e-38	0.198027	1	0.998	1.58659e-34
PGRP-LF	2.07438e-33	0.196891	0.414	0.179	2.1557e-29
stx	1.53572e-40	0.196376	0.296	0.101	1.59592e-36
Tspo	8.77419e-29	0.195991	0.582	0.299	9.11814e-25
mip40	1.57398e-32	0.194243	0.348	0.143	1.63569e-28
RasGAP1	1.23291e-42	0.194105	0.324	0.112	1.28124e-38
smt3	6.01553e-20	0.193097	0.96	0.82	6.25134e-16
Ip259	1.81346e-18	0.192797	0.802	0.557	1.88455e-14
mbl	1.56663e-28	0.191653	0.314	0.131	1.62804e-24
mago	5.71417e-26	0.19142	0.542	0.279	5.93817e-22
Atf3	2.6496e-31	0.190926	0.42	0.185	2.75347e-27
Non2	6.51119e-20	0.190692	0.762	0.483	6.76643e-16
CG6180	3.83483e-25	0.190416	0.588	0.312	3.98516e-21
CG42668	2.42683e-25	0.190323	0.502	0.258	2.52196e-21
CkIIbeta	1.93066e-21	0.189963	0.768	0.471	2.00634e-17
Pdcd4	2.00587e-17	0.189879	0.712	0.462	2.0845e-13
Nurf-38	6.97946e-17	0.189844	0.69	0.45	7.25306e-13
Xbp1	1.37099e-16	0.189834	0.84	0.59	1.42473e-12
bel	1.55013e-16	0.18834	0.804	0.525	1.6109e-12
RpS14a	6.63038e-31	0.188157	0.996	0.977	6.89029e-27
CG7971	1.05317e-28	0.188027	0.506	0.248	1.09446e-24
RpL17	2.50373e-34	0.187985	0.996	0.988	2.60187e-30
CG7839	8.70508e-34	0.187943	0.338	0.134	9.04632e-30
RpL23A	1.07323e-23	0.187446	0.99	0.968	1.1153e-19
UQCR-14	4.02974e-16	0.186548	0.774	0.527	4.1877e-12
His4r	1.11193e-15	0.186479	0.882	0.693	1.15551e-11
RpS7	3.37723e-31	0.186271	0.998	0.992	3.50962e-27
CG10527	1.02792e-16	0.186061	0.76	0.518	1.06821e-12
D1	1.13529e-17	0.186052	0.842	0.575	1.17979e-13
dl	2.69168e-32	0.185918	0.336	0.136	2.79719e-28
Hsc70-4	2.52094e-24	0.18552	0.992	0.919	2.61976e-20
CG13937	5.39117e-42	0.185459	0.226	0.065	5.6025e-38
CG32425	3.73607e-33	0.184593	0.444	0.196	3.88252e-29
tomboy40	3.30754e-64	0.183942	0.164	0.029	3.43719e-60
CG10576	7.29199e-16	0.183913	0.802	0.585	7.57783e-12
NAT1	1.1071e-17	0.183263	0.716	0.456	1.1505e-13
CG17734	3.32102e-21	0.183259	0.57	0.32	3.45121e-17
Vps60	6.62813e-23	0.183156	0.56	0.309	6.88796e-19
upd3	1.18687e-44	0.182749	0.208	0.055	1.2334e-40
Ssrp	5.1421e-29	0.182123	0.626	0.328	5.34367e-25
CG9922	2.37134e-23	0.181987	0.578	0.317	2.46429e-19
mt:ATPase6	7.72753e-14	0.181977	0.978	0.887	8.03045e-10
RpL34b	3.85644e-21	0.181861	0.99	0.956	4.00761e-17
CG5850	2.74847e-21	0.181145	0.664	0.385	2.85621e-17
CG32512	4.22876e-36	0.181052	0.12	0.026	4.39453e-32
CG11873	7.15481e-46	0.181045	0.31	0.1	7.43528e-42
RpL34a	1.38342e-15	0.180027	0.912	0.743	1.43765e-11
RpS28b	9.42044e-31	0.1799	0.998	0.988	9.78972e-27
rush	6.82789e-23	0.179584	0.676	0.374	7.09554e-19
CG11076	7.18512e-36	0.178294	0.356	0.139	7.46677e-32
Mthfs	1.99775e-40	0.178146	0.318	0.112	2.07606e-36
brat	1.5081e-24	0.177567	0.522	0.272	1.56721e-20
RpL19	2.73517e-29	0.176879	1	0.991	2.84238e-25
ifc	6.80676e-19	0.176769	0.718	0.446	7.07359e-15
RpS23	1.12067e-34	0.176524	0.998	0.995	1.1646e-30
Mob2	3.2512e-25	0.176243	0.53	0.274	3.37865e-21
bor	2.20973e-32	0.176189	0.312	0.121	2.29635e-28
Dsim-Pgm	2.24543e-50	0.175972	0.22	0.056	2.33345e-46
SpdS	4.13324e-39	0.175749	0.436	0.176	4.29526e-35
RpL35	7.84276e-31	0.175589	0.996	0.987	8.1502e-27
RpL3	4.80174e-26	0.17533	0.992	0.985	4.98996e-22
CG2003	1.63905e-22	0.175113	0.422	0.215	1.7033e-18
Tif-IA	3.16564e-28	0.174877	0.39	0.175	3.28973e-24
Mys45A	4.43268e-32	0.174485	0.394	0.168	4.60644e-28
Sr-CIII	6.723e-33	0.174195	0.296	0.112	6.98654e-29
E2f1	6.18917e-20	0.173819	0.566	0.327	6.43179e-16
Sms	1.0324e-27	0.173803	0.308	0.128	1.07287e-23
CG3760	2.08213e-21	0.172659	0.67	0.383	2.16375e-17
RpS15Aa	1.31499e-24	0.172366	0.994	0.977	1.36654e-20
Ent2	6.02873e-30	0.171597	0.564	0.275	6.26506e-26
olf186-F	2.57192e-27	0.171276	0.41	0.189	2.67274e-23
elB	7.56589e-79	0.170258	0.168	0.025	7.86247e-75
schlank	3.85072e-14	0.169889	0.86	0.628	4.00167e-10
alph	1.53985e-20	0.169258	0.62	0.356	1.60021e-16
Xrp1	3.89338e-16	0.16913	0.922	0.695	4.046e-12
CG10098	8.48578e-30	0.168922	0.352	0.15	8.81843e-26
CG17768	4.08407e-39	0.168757	0.382	0.146	4.24416e-35
Fib	6.40299e-29	0.168579	0.62	0.316	6.65399e-25
CG15423	1.56792e-11	0.167364	0.072	0.024	1.62938e-07
coro	9.66939e-37	0.167271	0.454	0.191	1.00484e-32
RFeSP	4.25009e-17	0.166985	0.718	0.46	4.41669e-13
GstE9	6.11405e-42	0.166895	0.192	0.05	6.35373e-38
CG30109	1.33021e-43	0.166553	0.226	0.064	1.38236e-39
mthl13	9.21998e-164	0.166326	0.114	0.005	9.58141e-160
RpL38	3.0839e-28	0.16612	0.998	0.995	3.20479e-24
AMPdeam	8.69869e-33	0.166091	0.314	0.121	9.03968e-29
eEF1delta	1.06865e-12	0.165675	0.816	0.61	1.11054e-08
Cad99C	6.17204e-55	0.165588	0.134	0.023	6.41398e-51
CG7800	5.22004e-36	0.165425	0.282	0.099	5.42466e-32
Crag	2.81192e-35	0.165163	0.34	0.131	2.92215e-31
Sod2	4.50374e-20	0.164539	0.622	0.36	4.68028e-16
et	1.2592e-28	0.163961	0.562	0.276	1.30856e-24
CG11583	1.06049e-31	0.163898	0.336	0.135	1.10206e-27
fray	8.62007e-43	0.163802	0.272	0.086	8.95797e-39
CG31431	2.18392e-29	0.163278	0.472	0.223	2.26953e-25
CG4025	7.14278e-29	0.162748	0.432	0.198	7.42277e-25
CG4080	1.93702e-24	0.161724	0.338	0.152	2.01295e-20
UQCR-C1	5.31246e-19	0.1617	0.724	0.432	5.52071e-15
HmgD	6.72366e-14	0.16142	0.94	0.806	6.98723e-10
Ars2	9.3912e-22	0.161387	0.518	0.279	9.75934e-18
spict	5.26028e-31	0.161247	0.488	0.226	5.46648e-27
pont	2.91424e-29	0.161173	0.454	0.211	3.02848e-25
Tim17b	1.9522e-14	0.160964	0.808	0.571	2.02872e-10
stck	3.85567e-28	0.159706	0.456	0.214	4.00681e-24
mRpS26	2.38358e-28	0.159414	0.352	0.152	2.47701e-24
mge	8.71285e-26	0.159213	0.542	0.276	9.05439e-22
mRpS5	1.57446e-30	0.15904	0.328	0.133	1.63618e-26
Surf6	8.48873e-32	0.158989	0.346	0.14	8.82149e-28
RpS30	2.29974e-25	0.158765	0.992	0.982	2.38989e-21
CG5323	5.95292e-31	0.158592	0.368	0.155	6.18627e-27
Fur1	2.47463e-34	0.158533	0.266	0.093	2.57164e-30
cup	4.90964e-28	0.158484	0.332	0.14	5.10209e-24
AdSS	3.36252e-22	0.158431	0.562	0.302	3.49433e-18
Acn	2.63737e-27	0.157416	0.494	0.241	2.74075e-23
SerRS	5.58857e-21	0.156964	0.62	0.348	5.80764e-17
CG32795	4.05557e-36	0.156874	0.296	0.106	4.21455e-32
CG1703	4.74902e-18	0.156735	0.576	0.338	4.93518e-14
CG44251	3.81263e-39	0.156462	0.17	0.043	3.96208e-35
CG12288	7.1411e-28	0.15639	0.256	0.098	7.42103e-24
CG33671	7.66099e-34	0.156199	0.318	0.121	7.9613e-30
CG44774	1.11371e-10	0.155237	0.4	0.241	1.15737e-06
CG10565	2.24695e-28	0.154881	0.448	0.21	2.33503e-24
CG11486	7.29937e-22	0.154553	0.664	0.377	7.5855e-18
CG11563	1.32514e-29	0.154063	0.308	0.124	1.37708e-25
Map205	4.50758e-18	0.153946	0.73	0.445	4.68428e-14
l(2)k09848	1.83951e-40	0.15374	0.298	0.101	1.91162e-36
He	7.31942e-15	0.153553	0.962	0.819	7.60634e-11
yuri	1.2568e-32	0.15335	0.262	0.093	1.30607e-28
eIF3g1	4.94208e-14	0.153195	0.68	0.442	5.13581e-10
CG42788	3.72496e-44	0.153112	0.148	0.031	3.87097e-40
CG34288	2.75426e-30	0.152852	0.32	0.129	2.86222e-26
Moe	8.9395e-18	0.152644	0.994	0.961	9.28993e-14
ghi	1.12144e-18	0.152597	0.546	0.31	1.1654e-14
uex	3.6751e-19	0.15233	0.682	0.406	3.81917e-15
GILT1	1.38156e-28	0.152012	0.296	0.119	1.43572e-24
CG14480	7.68734e-27	0.151992	0.356	0.158	7.98869e-23
PDCD-5	2.66139e-21	0.151936	0.464	0.244	2.76572e-17
RpS2	2.44707e-21	0.151904	0.998	0.986	2.54299e-17
Rad23	9.17454e-23	0.151499	0.518	0.271	9.53418e-19
EndoGI	7.89771e-29	0.15148	0.438	0.201	8.2073e-25
CG30349	2.24566e-26	0.151087	0.352	0.156	2.33369e-22
CG31917	7.35434e-28	0.150558	0.254	0.097	7.64263e-24
Sf3b2	2.28391e-25	0.150551	0.432	0.208	2.37343e-21
CG17982	9.51489e-44	0.150398	0.206	0.055	9.88787e-40
CG42259	5.19549e-08	0.150391	0.16	0.087	0.000539916
Arf79F	1.92733e-14	0.15023	0.974	0.871	2.00288e-10
CG8620	1.66308e-27	0.15013	0.656	0.359	1.72827e-23
CG8891	1.02097e-18	0.150022	0.518	0.287	1.06099e-14
Spase22-23	0.635447	-0.150014	0.706	0.555	1
dup	0.092244	-0.150419	0.06	0.077	1
CG8306	0.798381	-0.150445	0.128	0.115	1
AMPKalpha	0.740367	-0.150538	0.11	0.108	1
Csp	0.0826236	-0.150789	0.324	0.25	1
wdp	0.0708329	-0.150812	0.098	0.12	1
Chchd3	0.00181662	-0.151043	0.08	0.125	1
CG34436	4.59761e-07	-0.151338	0.008	0.062	0.00477784
Ugt316A1	0.439022	-0.152124	0.186	0.158	1
asRNA:CR43957	0.414961	-0.152248	0.242	0.205	1
Klp98A	0.0350649	-0.152297	0.078	0.103	1
msi	0.0392742	-0.152367	0.516	0.381	1
CG9302	0.949987	-0.152684	0.39	0.338	1
cnn	0.046916	-0.15272	0.09	0.115	1
Gk1	0.0021523	-0.152811	0.046	0.083	1
CG2493	0.893324	-0.15308	0.606	0.48	1
GstD7	0.378277	-0.153654	0.162	0.136	1
Cpsf6	0.0342164	-0.153742	0.386	0.29	1
CG43340	0.768256	-0.154343	0.168	0.15	1
CG33978	0.000135724	-0.15483	0.03	0.075	1
dnk	0.517476	-0.155022	0.15	0.153	1
RNASEK	0.00192084	-0.15505	0.902	0.769	1
Dsp1	0.0778277	-0.155067	0.402	0.308	1
gammaTub23C	0.6421	-0.155201	0.172	0.151	1
CG3902	0.0679468	-0.155273	0.45	0.338	1
sPLA2	0.381179	-0.155741	0.096	0.102	1
CG1620	0.5527	-0.155837	0.112	0.113	1
ScsbetaG	0.0226357	-0.155956	0.098	0.129	1
Rab14	0.733293	-0.156388	0.25	0.218	1
Rbcn-3B	0.461225	-0.156576	0.138	0.118	1
wech	0.383656	-0.157111	0.25	0.251	1
28SrRNA-Psi:CR41609	0.690938	-0.157155	0.09	0.081	1
Usp47	0.0110695	-0.15721	0.068	0.101	1
CG1103	0.560399	-0.157473	0.256	0.221	1
cv	0.209877	-0.157581	0.13	0.142	1
Rme-8	0.826068	-0.15777	0.168	0.152	1
Gpdh1	0.0308581	-0.158377	0.136	0.171	1
alpha-Est1	0.0339772	-0.158427	0.066	0.091	1
CG3065	0.0403266	-0.158876	0.088	0.113	1
CG1840	0.324134	-0.15891	0.116	0.123	1
Sec61gamma	0.503597	-0.159176	0.646	0.504	1
CG15211	0.448527	-0.15976	0.636	0.488	1
CG6805	0.0231424	-0.159889	0.068	0.096	1
CG40160	0.0308592	-0.159981	0.064	0.089	1
Der-1	0.120803	-0.160174	0.4	0.309	1
Pitslre	0.960816	-0.160244	0.146	0.136	1
mtgo	0.976	-0.160804	0.5	0.426	1
TrpRS	0.00136233	-0.160995	0.046	0.085	1
Npc1a	0.647618	-0.160999	0.19	0.183	1
CG18549	0.426935	-0.161017	0.114	0.119	1
CG34159	0.165316	-0.1612	0.374	0.294	1
Prosap	0.837676	-0.161273	0.73	0.59	1
wrd	0.0194882	-0.161356	0.102	0.134	1
l(3)05822	0.152702	-0.161432	0.4	0.315	1
CG1265	0.605618	-0.161741	0.22	0.19	1
Psa	0.162812	-0.161925	0.342	0.271	1
CG44085	0.00132063	-0.161998	0.04	0.078	1
Cpr	0.616563	-0.162074	0.16	0.157	1
mRpL34	0.329334	-0.162081	0.256	0.211	1
Gip	2.25951e-06	-0.162314	0.31	0.198	0.0234809
CG12744	0.556609	-0.162433	0.142	0.142	1
CG43110	0.668723	-0.163556	0.16	0.163	1
poe	0.994419	-0.163872	0.23	0.209	1
sky	0.00634569	-0.163892	0.078	0.115	1
lncRNA:CR45625	0.000183824	-0.164083	0.028	0.071	1
Tis11	0.153747	-0.164343	0.792	0.651	1
BuGZ	0.0935192	-0.164411	0.318	0.246	1
eIF4G2	0.0879648	-0.164498	0.21	0.223	1
CG14966	0.777498	-0.165779	0.16	0.151	1
CG33181	0.00279352	-0.166025	0.04	0.074	1
ScpX	0.17123	-0.166054	0.15	0.163	1
scra	0.385704	-0.167369	0.212	0.213	1
CG8066	0.00232652	-0.167493	0.1	0.144	1
CG33303	0.484049	-0.167723	0.718	0.567	1
Smr	0.60991	-0.167787	0.56	0.447	1
cpx	0.0273268	-0.168528	0.042	0.066	1
gzl	0.000997278	-0.168615	0.076	0.123	1
l(3)80Fg	0.00193417	-0.169252	0.056	0.096	1
TM4SF	0.0581986	-0.169436	0.078	0.101	1
Pgant5	0.00646589	-0.169555	0.11	0.15	1
Lon	0.632044	-0.169604	0.388	0.334	1
caz	0.0452566	-0.170012	0.436	0.319	1
mamo	0.469037	-0.170055	0.578	0.457	1
nsl1	0.564865	-0.170663	0.214	0.208	1
PCNA	0.369673	-0.17067	0.33	0.273	1
ND-42	0.00593977	-0.172066	0.114	0.155	1
Nct	0.00678627	-0.172162	0.082	0.119	1
Abi	0.0540963	-0.17239	0.202	0.225	1
axed	0.00851714	-0.172929	0.056	0.088	1
Pgm2a	0.0055769	-0.173078	0.104	0.145	1
Edem2	0.113028	-0.173164	0.098	0.116	1
lncRNA:CR43334	0.414208	-0.173871	0.156	0.158	1
CG9171	0.303022	-0.173971	0.39	0.314	1
twr	0.167599	-0.174043	0.768	0.627	1
Scsalpha1	0.0112279	-0.174416	0.19	0.232	1
ValRS	5.18039e-06	-0.17451	0.016	0.067	0.0538347
CG33459	0.0474981	-0.174525	0.266	0.199	1
Jheh1	0.00698043	-0.174786	0.046	0.076	1
Rab35	0.313107	-0.174942	0.54	0.408	1
Fer2LCH	6.73227e-11	-0.175077	0.852	0.808	6.99618e-07
Atpalpha	0.602476	-0.175151	0.732	0.608	1
CG10425	0.908519	-0.175163	0.324	0.289	1
CG1640	0.0444384	-0.175361	0.372	0.278	1
Eip74EF	0.00880847	-0.176727	0.052	0.082	1
Sdc	0.00309619	-0.177182	0.088	0.13	1
fog	0.714904	-0.177321	0.282	0.243	1
Bsg	0.105681	-0.177392	0.782	0.621	1
sgl	0.437485	-0.178479	0.394	0.32	1
ND-19	0.00182585	-0.178556	0.1	0.148	1
CalpB	0.371063	-0.17866	0.34	0.279	1
CG1275	0.00240036	-0.178901	0.096	0.141	1
Alg3	8.5857e-05	-0.179196	0.034	0.082	0.892226
CG17776	0.914655	-0.179417	0.26	0.234	1
CG13315	0.000722513	-0.17989	0.05	0.093	1
RpII140	0.256296	-0.17991	0.114	0.124	1
CG42322	0.235303	-0.180091	0.148	0.16	1
HisRS	0.000737578	-0.180854	0.054	0.097	1
CG7322	0.834602	-0.18094	0.172	0.162	1
GstE11	2.57558e-05	-0.181188	0.042	0.098	0.267654
LpR2	0.000412594	-0.181446	0.542	0.552	1
ubl	0.576795	-0.181662	0.336	0.278	1
agt	0.267785	-0.181754	0.218	0.222	1
CG5522	0.938941	-0.181867	0.2	0.185	1
ergic53	0.533946	-0.182206	0.576	0.45	1
Paics	0.00130398	-0.182543	0.088	0.135	1
Not1	0.741967	-0.182588	0.68	0.539	1
eas	0.569234	-0.182896	0.172	0.168	1
Got2	0.643766	-0.183301	0.596	0.468	1
Bet3	0.823584	-0.18345	0.182	0.17	1
CG31915	0.24453	-0.183703	0.116	0.126	1
hfp	0.000101995	-0.183958	0.036	0.083	1
gus	0.840281	-0.184015	0.168	0.157	1
Pi3K68D	0.11343	-0.184457	0.11	0.127	1
Grasp65	0.895222	-0.184606	0.264	0.233	1
Xpc	0.000569758	-0.185307	0.04	0.081	1
Pat1	0.405892	-0.185407	0.238	0.232	1
NimB2	0.0128814	-0.185552	0.084	0.116	1
CG17029	0.100082	-0.185775	0.132	0.15	1
CG9005	0.0057087	-0.185848	0.07	0.105	1
mt:ND1	0.000169283	-0.186194	0.958	0.879	1
asf1	0.602406	-0.186198	0.224	0.192	1
TER94	0.325739	-0.18623	0.654	0.545	1
Hsp70Aa	0.0134889	-0.186347	0.07	0.102	1
OstDelta	0.8972	-0.186379	0.602	0.48	1
CG5196	0.804429	-0.186638	0.17	0.16	1
grsm	0.838702	-0.186758	0.274	0.247	1
betaCOP	0.242204	-0.186819	0.336	0.266	1
Galphaq	0.683786	-0.187672	0.454	0.368	1
gammaCOP	0.131956	-0.187716	0.372	0.287	1
Pcf11	0.00050407	-0.187894	0.058	0.104	1
tral	0.49951	-0.188053	0.388	0.318	1
lncRNA:CR34335	4.64999e-14	-0.188262	0.992	0.971	4.83227e-10
PIG-T	0.74295	-0.188593	0.248	0.216	1
AP-2alpha	0.573187	-0.18869	0.36	0.296	1
CG17574	0.0218502	-0.189146	0.756	0.628	1
MFS16	0.508862	-0.189348	0.138	0.137	1
PIG-K	0.0911192	-0.189402	0.1	0.118	1
CG9425	0.517433	-0.189484	0.214	0.207	1
sano	0.00199551	-0.189761	0.03	0.063	1
RnrL	0.397803	-0.189971	0.172	0.173	1
VhaAC45	0.0210943	-0.190006	0.628	0.561	1
Piezo	0.617166	-0.1921	0.402	0.331	1
wol	0.52818	-0.192183	0.402	0.328	1
Cdc42	0.00157166	-0.192318	0.8	0.692	1
Pen	0.593104	-0.19264	0.634	0.487	1
pbl	0.00169056	-0.192758	0.064	0.104	1
CG14969	0.279696	-0.19285	0.124	0.131	1
prtp	0.2642	-0.193254	0.542	0.475	1
sug	0.016589	-0.19329	0.066	0.094	1
Sec23	0.144725	-0.193562	0.356	0.277	1
ClC-b	0.681524	-0.193587	0.16	0.153	1
Hsp70Ab	0.0108733	-0.193981	0.072	0.105	1
RpA-70	0.698772	-0.194021	0.254	0.235	1
Sema1b	0.0333726	-0.194157	0.116	0.144	1
Sec31	0.503601	-0.194383	0.228	0.218	1
CG18343	0.176303	-0.19446	0.214	0.219	1
GM130	0.992618	-0.194661	0.184	0.166	1
CG6236	0.998275	-0.19509	0.416	0.354	1
CG1902	0.406828	-0.195369	0.256	0.212	1
CG32069	0.577587	-0.19572	0.232	0.22	1
Cht2	0.00590737	-0.195974	0.12	0.159	1
Jafrac2	0.331699	-0.196001	0.482	0.367	1
Fdh	0.530891	-0.196172	0.612	0.504	1
Mes2	0.92467	-0.196273	0.314	0.276	1
GstE2	0.00410081	-0.196366	0.284	0.199	1
Alg-2	0.478357	-0.197158	0.438	0.347	1
mRpL33	0.475115	-0.197349	0.486	0.381	1
CG3091	0.000130959	-0.197518	0.068	0.123	1
lncRNA:CR45321	2.5505e-06	-0.197653	0.018	0.072	0.0265048
Ubi-p63E	0.429795	-0.197834	0.466	0.403	1
GstE1	0.00368285	-0.197887	0.358	0.255	1
GstD9	0.113599	-0.198021	0.144	0.159	1
Msp300	0.00711261	-0.198043	0.95	0.884	1
CR18228	1.43744e-05	-0.198091	0.062	0.125	0.149379
Sin3A	0.586298	-0.198501	0.186	0.179	1
CG12171	0.746256	-0.198505	0.254	0.233	1
Ankle2	0.000282484	-0.198819	0.04	0.084	1
CG30046	0.473074	-0.198867	0.24	0.229	1
CG30456	0.0203713	-0.199067	0.094	0.123	1
srp	0.985991	-0.200298	0.638	0.498	1
Sec13	0.378467	-0.201028	0.534	0.404	1
cib	1.0552e-05	-0.201408	0.97	0.881	0.109657
Adk3	0.0388408	-0.201494	0.114	0.139	1
HDAC1	0.0037317	-0.201795	0.122	0.166	1
CG8080	0.351618	-0.202189	0.204	0.202	1
peng	1.74624e-05	-0.202204	0.028	0.079	0.181469
Aldh	0.0146514	-0.202661	0.816	0.663	1
lncRNA:CR44459	6.17313e-06	-0.202739	0.028	0.084	0.0641512
mEFTu1	0.000872511	-0.202926	0.088	0.137	1
CG2162	0.362854	-0.202957	0.172	0.172	1
Sara	0.00716262	-0.203069	0.078	0.112	1
CG32147	0.147163	-0.203175	0.17	0.183	1
CG5934	0.0219778	-0.203219	0.174	0.203	1
CG7483	1.07453e-05	-0.203372	0.042	0.1	0.111666
alphaCOP	0.650711	-0.203482	0.316	0.268	1
CDase	0.00491924	-0.203903	0.066	0.1	1
Ppa	0.00128897	-0.204399	0.048	0.086	1
Spred	0.00103072	-0.204455	0.1	0.148	1
CG10469	0.433555	-0.20527	0.104	0.09	1
rudhira	0.754259	-0.205467	0.32	0.287	1
Traf-like	0.0607598	-0.206159	0.252	0.272	1
CG5254	0.875313	-0.206159	0.232	0.204	1
bru3	0.0206219	-0.206789	0.094	0.126	1
CG14695	0.00124377	-0.206882	0.08	0.125	1
yip2	0.000655352	-0.207003	0.254	0.307	1
CG10859	3.67319e-06	-0.207076	0.066	0.139	0.0381718
sn	0.0134124	-0.2075	0.074	0.105	1
Phm	0.311926	-0.207824	0.416	0.374	1
Gs1	0.00201204	-0.208048	0.102	0.149	1
l(2)k09913	0.990936	-0.208069	0.226	0.202	1
Treh	0.155031	-0.208217	0.236	0.19	1
Pkc98E	0.0299405	-0.209467	0.12	0.148	1
Tsp42Ed	0.00837814	-0.209472	0.16	0.202	1
Ank	0.743739	-0.210028	0.446	0.361	1
chrb	0.112377	-0.210115	0.098	0.115	1
CG4572	0.880362	-0.210175	0.486	0.397	1
CG17765	0.219918	-0.210644	0.478	0.37	1
SCAR	0.319355	-0.210707	0.362	0.337	1
sigmar	0.386698	-0.210885	0.246	0.237	1
cass	1.23526e-05	-0.211281	0.07	0.137	0.128368
Spn28Dc	8.82005e-05	-0.211633	0.076	0.133	0.91658
Prp8	0.493459	-0.21184	0.156	0.153	1
CG5828	0.0966725	-0.211986	0.042	0.058	1
Jupiter	0.347174	-0.211999	0.778	0.62	1
RhoGEF2	0.162482	-0.212244	0.136	0.148	1
Jheh2	0.630555	-0.212512	0.412	0.334	1
SppL	0.0253972	-0.212879	0.132	0.161	1
Mhcl	0.00612004	-0.213516	0.144	0.186	1
sel	0.465957	-0.21373	0.49	0.386	1
CG18135	0.0024026	-0.213842	0.07	0.109	1
Sec61alpha	0.00244333	-0.214114	0.802	0.687	1
CR43482	0.0013519	-0.215318	0.044	0.082	1
TyrRS	4.44882e-05	-0.216123	0.078	0.141	0.462321
Cyp4e2	0.354753	-0.216748	0.312	0.293	1
br	0.50104	-0.217111	0.374	0.307	1
Ser	5.6722e-05	-0.217175	0.044	0.096	0.589455
P58IPK	0.593677	-0.217497	0.238	0.223	1
UGP	0.0420913	-0.217553	0.206	0.23	1
LysRS	0.000329077	-0.218242	0.14	0.2	1
AP-1-2beta	0.380356	-0.218879	0.294	0.277	1
Tgi	0.0181918	-0.218915	0.188	0.219	1
CG9331	0.165747	-0.219286	0.614	0.513	1
Surf4	0.154582	-0.22136	0.61	0.514	1
beta'COP	0.563328	-0.221401	0.312	0.286	1
GlyRS	0.000460302	-0.222833	0.138	0.195	1
CG31219	0.220139	-0.223936	0.18	0.144	1
brm	0.368842	-0.224524	0.17	0.169	1
kud	0.925733	-0.225284	0.616	0.47	1
CG1648	2.63322e-08	-0.225424	0.366	0.214	0.000273644
udd	0.827147	-0.225557	0.354	0.316	1
Hsp70Ba	0.00934681	-0.226399	0.04	0.068	1
Oat	0.128404	-0.226592	0.186	0.196	1
CG7484	0.593721	-0.227048	0.314	0.279	1
Cnx99A	0.133751	-0.227676	0.6	0.5	1
Stt3A	0.676015	-0.228103	0.478	0.4	1
Uggt	0.000363348	-0.228197	0.118	0.176	1
ND-75	5.30567e-05	-0.229051	0.104	0.168	0.551365
vsg	1.19783e-13	-0.229572	0.948	0.901	1.24479e-09
Pdk	0.0283317	-0.231219	0.14	0.166	1
jp	0.00032498	-0.23165	0.072	0.122	1
CG2915	0.977102	-0.23184	0.402	0.333	1
Hsp70Bbb	0.00590969	-0.233001	0.038	0.068	1
Snx17	0.000830801	-0.233876	0.07	0.115	1
CG2991	0.219737	-0.234771	0.326	0.308	1
cv-2	0.162257	-0.235638	0.196	0.203	1
Oatp74D	0.0674384	-0.23596	0.14	0.158	1
CG1532	0.0224168	-0.236112	0.2	0.224	1
Caf1-55	0.000150571	-0.236169	0.13	0.193	1
CG43759	4.68868e-07	-0.236751	0.026	0.09	0.00487247
ced-6	0.648259	-0.236794	0.416	0.361	1
PI31	0.0299799	-0.236808	0.168	0.191	1
Svil	0.0227734	-0.237077	0.184	0.211	1
Sr-CIV	0.000207698	-0.239989	0.098	0.153	1
mam	0.529502	-0.240637	0.366	0.325	1
CG4927	0.000124014	-0.240643	0.228	0.293	1
CG10413	0.0095438	-0.241105	0.258	0.287	1
Rbf	0.382936	-0.242449	0.242	0.233	1
Gfat2	0.0486909	-0.244641	0.598	0.512	1
Stip1	1.03961e-05	-0.245668	0.126	0.202	0.108037
Prip	2.4626e-07	-0.245929	0.842	0.8	0.00255913
CG8176	0.00768204	-0.246051	0.214	0.246	1
Cse1	2.7447e-05	-0.246549	0.072	0.133	0.285229
AP-2sigma	0.152481	-0.247797	0.512	0.44	1
pnr	0.000402918	-0.24782	0.164	0.221	1
Naa15-16	6.50894e-06	-0.248449	0.082	0.152	0.067641
prominin-like	0.194457	-0.250064	0.346	0.329	1
RnrS	0.662079	-0.251089	0.288	0.242	1
CG8668	0.0150289	-0.251336	0.164	0.191	1
Cds	4.34814e-06	-0.251393	0.052	0.116	0.0451858
Slik	9.21282e-07	-0.251583	0.144	0.233	0.00957397
crp	0.857185	-0.252608	0.372	0.305	1
Hipk	9.86442e-05	-0.252667	0.112	0.175	1
CG12643	0.0489031	-0.253399	0.162	0.181	1
kar	4.07819e-06	-0.253421	0.056	0.121	0.0423805
Mmp2	2.42457e-05	-0.253609	0.038	0.092	0.251962
CG17928	5.75845e-06	-0.254418	0.068	0.134	0.0598418
GlnRS	1.80105e-05	-0.255349	0.056	0.114	0.187165
RanBP3	0.00560382	-0.255662	0.142	0.179	1
26-29-p	0.0198512	-0.255815	0.666	0.573	1
CaBP1	0.00765577	-0.255869	0.77	0.647	1
ps	2.36927e-18	-0.25628	0.95	0.904	2.46214e-14
Nepl4	4.70949e-05	-0.256546	0.086	0.147	0.489411
CG6191	0.00866475	-0.256631	0.332	0.374	1
cindr	0.0300907	-0.256664	0.66	0.553	1
fax	0.000424724	-0.256739	0.302	0.364	1
eIF3j	1.96295e-05	-0.257729	0.17	0.246	0.20399
Ndae1	0.000278063	-0.257799	0.246	0.303	1
RpL39	0.000932234	-0.258348	0.994	0.969	1
Karl	8.68554e-14	-0.258489	0.908	0.834	9.02602e-10
Lamp1	1.2575e-05	-0.258706	0.732	0.644	0.130679
CoRest	0.0186046	-0.259041	0.14	0.167	1
Pi3K21B	0.0237594	-0.259378	0.182	0.206	1
Spase12	0.529354	-0.260663	0.568	0.447	1
Pgant6	1.0181e-06	-0.260975	0.064	0.138	0.0105801
ScsbetaA	4.42007e-05	-0.262292	0.178	0.252	0.459334
CG42846	5.55824e-07	-0.262618	0.048	0.118	0.00577613
rl	0.262022	-0.262852	0.218	0.214	1
pigs	9.78864e-05	-0.263962	0.164	0.225	1
Acer	3.50653e-06	-0.264959	0.07	0.139	0.0364399
AlaRS	0.000154769	-0.265189	0.102	0.158	1
28SrRNA:CR45837	0.312028	-0.265847	0.182	0.195	1
CG32638	0.000627484	-0.266486	0.182	0.235	1
AspRS	4.46234e-07	-0.267056	0.06	0.135	0.00463726
mAcon1	3.6091e-05	-0.267952	0.166	0.241	0.375057
CG2444	0.00581655	-0.268304	0.108	0.143	1
Meltrin	1.18624e-14	-0.268536	0.34	0.546	1.23274e-10
Pdha	3.4243e-05	-0.26885	0.14	0.21	0.355853
lola	0.00386399	-0.269499	0.628	0.555	1
ThrRS	6.17662e-06	-0.270005	0.104	0.179	0.0641874
EGFP	0.00165916	-0.270137	0.292	0.352	1
CG30414	3.19052e-06	-0.270601	0.07	0.139	0.0331558
cher	0.195489	-0.270947	0.67	0.552	1
Sps1	5.23881e-07	-0.271205	0.076	0.155	0.00544417
shep	4.41513e-11	-0.271321	0.946	0.872	4.58821e-07
alc	0.0355794	-0.271474	0.406	0.386	1
ItgaPS5	0.000347901	-0.271563	0.108	0.162	1
zda	0.244016	-0.271652	0.506	0.423	1
N	0.0173365	-0.273293	0.382	0.383	1
betaTub97EF	0.0963531	-0.273527	0.258	0.257	1
ref(2)P	0.143822	-0.273606	0.2	0.207	1
PyK	0.00829964	-0.273969	0.592	0.52	1
kek1	0.000317171	-0.274551	0.118	0.173	1
CG5888	0.00746121	-0.275021	0.19	0.223	1
Idh3a	9.68348e-06	-0.275699	0.214	0.3	0.100631
Cp1	4.409e-33	-0.276334	0.828	0.892	4.58183e-29
pum	4.75965e-11	-0.27779	0.9	0.807	4.94623e-07
Eno	0.745943	-0.278137	0.652	0.507	1
CG7627	0.00648898	-0.278454	0.14	0.174	1
ND-PDSW	3.71109e-06	-0.279073	0.154	0.237	0.0385656
Snx6	0.0846406	-0.280094	0.456	0.411	1
CG2852	1.59903e-26	-0.280365	0.994	0.963	1.66171e-22
CG6770	0.0243869	-0.281335	0.37	0.274	1
Fer1HCH	7.32343e-08	-0.281366	0.668	0.639	0.000761051
MP1	0.000912888	-0.281473	0.176	0.222	1
Hsp70Bb	0.00027233	-0.281514	0.046	0.091	1
CG43658	2.11023e-06	-0.283385	0.064	0.133	0.0219295
su(r)	5.81797e-06	-0.285488	0.116	0.19	0.0604604
RhoGAP68F	0.100716	-0.285568	0.3	0.29	1
eIF4EHP	1.19181e-05	-0.285839	0.124	0.197	0.123853
CG5854	0.000205407	-0.286815	0.386	0.416	1
SERCA	2.80087e-06	-0.287038	0.174	0.259	0.0291066
cwo	0.0262522	-0.288081	0.224	0.24	1
GlcAT-P	6.63293e-05	-0.288274	0.396	0.429	0.689294
SREBP	7.97683e-06	-0.289259	0.17	0.25	0.0828952
Snoo	0.66596	-0.289839	0.456	0.408	1
eRF3	3.42696e-06	-0.293844	0.164	0.247	0.035613
ND-30	2.24369e-06	-0.295191	0.12	0.2	0.0233164
wge	0.0697235	-0.295421	0.442	0.397	1
TM9SF2	0.0108936	-0.296202	0.542	0.482	1
CG5377	0.0609671	-0.297265	0.25	0.25	1
CG3609	0.0510415	-0.297808	0.376	0.352	1
capt	0.0011525	-0.297936	0.7	0.586	1
AP-2mu	0.0320993	-0.298954	0.332	0.328	1
cv-d	0.00335892	-0.299433	0.492	0.464	1
CG4259	1.66233e-12	-0.299564	0.804	0.738	1.7275e-08
tna	0.000108824	-0.299642	0.098	0.156	1
FucTB	1.05906e-07	-0.300094	0.078	0.163	0.00110057
ci	1.34311e-06	-0.300259	0.044	0.109	0.0139576
Idgf3	1.69287e-07	-0.301305	0.754	0.684	0.00175923
CG10863	0.0344716	-0.302941	0.452	0.407	1
fdl	0.0428197	-0.303666	0.342	0.33	1
ND-SGDH	1.12824e-06	-0.303684	0.11	0.191	0.0117247
Had2	1.80589e-11	-0.304113	0.328	0.482	1.87668e-07
Pfdn2	1.01232e-07	-0.305453	0.126	0.221	0.001052
ena	0.00405932	-0.306082	0.328	0.346	1
Orct	7.96028e-08	-0.306825	0.06	0.142	0.000827232
mt:ND4	1.58328e-12	-0.306902	0.944	0.866	1.64535e-08
CG10877	1.25904e-07	-0.308249	0.108	0.199	0.0013084
Hsp83	1.32281e-06	-0.309043	0.946	0.886	0.0137467
CG15347	1.10739e-32	-0.309137	0.516	0.233	1.1508e-28
EcR	6.79214e-05	-0.310071	0.106	0.164	0.705839
UQCR-6.4	0.0325743	-0.311862	0.548	0.468	1
Vamp7	0.233221	-0.312021	0.452	0.387	1
Gale	1.88943e-06	-0.312261	0.678	0.608	0.0196349
CG17839	8.40616e-07	-0.312779	0.098	0.18	0.00873568
AsnRS	4.47972e-08	-0.313287	0.1	0.192	0.000465533
Mcm7	0.000834675	-0.314473	0.106	0.151	1
ox	0.0117528	-0.314735	0.696	0.566	1
CG31337	2.49798e-12	-0.316309	0.826	0.753	2.5959e-08
Sod1	2.46797e-09	-0.317798	0.204	0.326	2.56472e-05
CG5151	8.39469e-07	-0.318897	0.198	0.283	0.00872376
Taldo	7.15921e-07	-0.320127	0.12	0.204	0.00743985
CG7120	7.56041e-08	-0.321008	0.122	0.215	0.000785677
Aldh-III	0.00122338	-0.323004	0.362	0.369	1
Plp	7.68469e-08	-0.32448	0.066	0.149	0.000798593
CG42748	5.2772e-06	-0.324829	0.13	0.203	0.0548407
eIF3i	6.20866e-08	-0.324916	0.244	0.35	0.000645203
CG3164	0.00222234	-0.325089	0.316	0.335	1
ND-B17	2.07415e-09	-0.326287	0.118	0.226	2.15545e-05
C1GalTA	8.36925e-07	-0.330635	0.174	0.256	0.00869733
CG3558	0.000392367	-0.330715	0.31	0.34	1
eIF3m	4.74325e-10	-0.330865	0.192	0.321	4.92918e-06
Cyt-b5	0.0111341	-0.332241	0.56	0.48	1
Mpcp2	1.31688e-13	-0.332522	0.278	0.469	1.3685e-09
Gbeta13F	5.52923e-17	-0.332545	0.912	0.831	5.74598e-13
lncRNA:CR45660	7.92731e-09	-0.333825	0.052	0.138	8.23806e-05
ush	2.31881e-06	-0.33422	0.138	0.218	0.024097
Hsp60A	1.5112e-10	-0.335764	0.22	0.364	1.57044e-06
Mtpbeta	2.83957e-08	-0.336705	0.14	0.24	0.000295089
Cndp2	1.49396e-06	-0.336722	0.66	0.605	0.0155252
hoe1	6.76001e-10	-0.337166	0.03	0.118	7.025e-06
Myo61F	7.77996e-07	-0.337639	0.56	0.55	0.00808494
Npc2a	3.58852e-09	-0.337746	0.712	0.648	3.72919e-05
sxc	0.426574	-0.338381	0.35	0.305	1
Vha55	0.00111044	-0.340179	0.676	0.577	1
zip	1.71788e-15	-0.340305	0.858	0.786	1.78522e-11
LKRSDH	1.87458e-06	-0.340731	0.136	0.215	0.0194807
Ctr1A	0.018344	-0.341114	0.182	0.21	1
CG5958	4.29724e-05	-0.341782	0.204	0.27	0.446569
Tnpo	6.1337e-08	-0.34265	0.08	0.167	0.000637414
Ect4	4.94583e-06	-0.342872	0.13	0.2	0.0513971
eIF3h	3.0143e-08	-0.342964	0.094	0.185	0.000313246
CG3505	0.00238576	-0.34351	0.476	0.436	1
Ugt317A1	1.0397e-07	-0.343626	0.11	0.199	0.00108046
fmt	3.81185e-09	-0.344149	0.528	0.598	3.96127e-05
GCS2alpha	2.14595e-07	-0.347834	0.604	0.593	0.00223007
CCT6	7.65691e-08	-0.350328	0.17	0.268	0.000795706
ND-13B	3.04281e-11	-0.351403	0.062	0.175	3.16208e-07
Idh	8.11707e-06	-0.351673	0.472	0.482	0.0843526
CG7860	0.021248	-0.352639	0.036	0.059	1
Ahcy	5.26406e-09	-0.352958	0.104	0.206	5.47041e-05
CG15695	1.78981e-09	-0.354835	0.294	0.395	1.85997e-05
CG31075	2.60884e-05	-0.356028	0.666	0.573	0.271111
bt	9.48119e-07	-0.357198	0.038	0.103	0.00985285
Zasp52	8.46014e-08	-0.357751	0.12	0.211	0.000879178
GCS2beta	0.000321105	-0.357852	0.468	0.451	1
CCT5	1.81922e-10	-0.359075	0.24	0.373	1.89053e-06
CG31705	1.12989e-07	-0.359255	0.244	0.328	0.00117418
mrva	0.000185967	-0.359931	0.334	0.359	1
CG13585	3.20748e-05	-0.360293	0.506	0.48	0.333321
Nepl21	7.61194e-09	-0.361498	0.152	0.258	7.91033e-05
imd	0.000804203	-0.362398	0.22	0.256	1
Uhg7	0.0153826	-0.364801	0.356	0.37	1
cer	1.96691e-06	-0.364989	0.62	0.557	0.0204401
nrv3	9.56447e-07	-0.365742	0.162	0.253	0.00993939
mmy	0.000123231	-0.366158	0.386	0.402	1
pnt	1.35734e-08	-0.366332	0.416	0.485	0.000141054
nuf	2.96172e-08	-0.366363	0.124	0.216	0.000307782
eIF2alpha	1.93944e-09	-0.367508	0.19	0.31	2.01546e-05
ct	8.2278e-07	-0.369339	0.556	0.538	0.00855033
Abl	0.494342	-0.369632	0.516	0.459	1
CG31673	3.27245e-09	-0.369723	0.178	0.288	3.40073e-05
CG3328	2.56127e-09	-0.369836	0.134	0.243	2.66167e-05
eIF2gamma	1.08953e-11	-0.370345	0.04	0.146	1.13224e-07
E(spl)mbeta-HLH	0.0555288	-0.370349	0.26	0.264	1
eIF3d1	1.84478e-11	-0.375132	0.126	0.255	1.9171e-07
CG33774	0.0183339	-0.375388	0.502	0.438	1
eIF4B	1.15471e-10	-0.37701	0.136	0.258	1.19998e-06
28SrRNA-Psi:CR45860	0.00804971	-0.378702	0.09	0.123	1
CCT7	3.67546e-10	-0.379304	0.192	0.311	3.81954e-06
18SrRNA-Psi:CR45861	0.0134312	-0.381819	0.176	0.224	1
mt:ND5	6.30032e-14	-0.38186	0.934	0.866	6.5473e-10
Cyp9f2	1.81598e-09	-0.383146	0.156	0.262	1.88717e-05
Syp	2.5993e-13	-0.383784	0.828	0.768	2.70119e-09
COX5B	2.48083e-14	-0.384121	0.202	0.366	2.57808e-10
mthl4	0.0393674	-0.384456	0.13	0.152	1
eIF3c	1.06171e-11	-0.392872	0.156	0.29	1.10333e-07
Frl	8.47751e-21	-0.393283	0.732	0.77	8.80983e-17
eIF4E1	6.20412e-11	-0.393523	0.198	0.333	6.44732e-07
yellow-f	1.02516e-10	-0.393615	0.158	0.283	1.06535e-06
scf	4.18108e-15	-0.394862	0.732	0.692	4.34498e-11
CG15784	0.783158	-0.394915	0.19	0.172	1
CCT3	3.58993e-12	-0.395099	0.22	0.365	3.73065e-08
Idgf1	4.20587e-07	-0.396253	0.322	0.392	0.00437074
PPO3	0.000896749	-0.397302	0.02	0.053	1
mthl2	0.000102682	-0.401081	0.448	0.443	1
Chc	8.581e-06	-0.402383	0.592	0.538	0.0891737
Hsp27	0.0107224	-0.40311	0.354	0.344	1
Pvr	2.51539e-06	-0.410313	0.318	0.366	0.0261399
CG42369	2.42956e-10	-0.410875	0.178	0.298	2.52479e-06
LManI	5.18225e-07	-0.414518	0.204	0.276	0.00538539
kst	1.24162e-10	-0.41801	0.506	0.549	1.29029e-06
Lsd-2	3.98463e-06	-0.419041	0.232	0.296	0.0414083
lncRNA:alphagamma-element:CR32865	4.20475e-14	-0.421208	0.004	0.11	4.36957e-10
Atox1	0.0588069	-0.421981	0.362	0.356	1
CG30090	0.850167	-0.424209	0.23	0.202	1
drpr	1.19618e-10	-0.424983	0.188	0.311	1.24307e-06
NimB3	5.95265e-11	-0.42547	0.07	0.178	6.186e-07
HINT1	1.51486e-14	-0.427566	0.234	0.394	1.57425e-10
Gp93	1.2232e-13	-0.429259	0.806	0.729	1.27115e-09
Ugt37D1	4.68104e-12	-0.430195	0.06	0.175	4.86454e-08
Tlk	2.45201e-12	-0.430519	0.058	0.173	2.54813e-08
28SrRNA-Psi:CR40741	0.0431265	-0.430532	0.138	0.158	1
eIF3b	2.82769e-12	-0.430981	0.218	0.357	2.93853e-08
ERp60	4.69173e-43	-0.43624	0.98	0.949	4.87565e-39
CCT1	9.37496e-13	-0.437502	0.168	0.303	9.74246e-09
28SrRNA:CR45844	0.000280006	-0.437971	0.244	0.314	1
Fum1	1.7696e-13	-0.43816	0.072	0.202	1.83897e-09
NimB5	5.57455e-21	-0.438883	0.746	0.727	5.79307e-17
Sesn	1.68246e-05	-0.442234	0.21	0.263	0.174841
pre-rRNA:CR45846	3.64624e-05	-0.444337	0.28	0.361	0.378917
CG8860	1.63177e-05	-0.444602	0.74	0.608	0.169574
LManII	6.41492e-12	-0.447636	0.13	0.261	6.66638e-08
Hsc70-3	2.466e-16	-0.450816	0.952	0.887	2.56267e-12
CG9917	1.21759e-10	-0.451123	0.326	0.414	1.26532e-06
eIF3a	2.84792e-14	-0.453056	0.18	0.336	2.95956e-10
Gal	7.28164e-12	-0.453119	0.052	0.162	7.56708e-08
ATPsyngamma	7.17954e-14	-0.453989	0.148	0.293	7.46098e-10
ATPsynD	3.00641e-13	-0.454513	0.182	0.325	3.12426e-09
CG5973	1.01959e-14	-0.454863	0.164	0.32	1.05956e-10
Fkbp59	3.2556e-07	-0.456388	0.106	0.193	0.00338322
COX4	1.48855e-17	-0.457033	0.252	0.444	1.5469e-13
28SrRNA-Psi:CR45848	6.56506e-06	-0.457223	0.078	0.147	0.0682241
Myc	1.11104e-14	-0.457889	0.178	0.341	1.15459e-10
CG42711	1.12747e-18	-0.459236	0.266	0.469	1.17167e-14
CG30344	5.15529e-11	-0.459873	0.188	0.304	5.35738e-07
mt:ND2	0.000409181	-0.460867	0.746	0.616	1
pre-rRNA:CR45847	4.26527e-05	-0.460937	0.286	0.366	0.443247
Stt3B	2.52112e-13	-0.461652	0.184	0.326	2.61995e-09
Pdi	1.18071e-53	-0.462716	0.972	0.951	1.22699e-49
NimC1	3.99666e-11	-0.463992	0.11	0.224	4.15333e-07
Dad1	2.15868e-13	-0.464274	0.156	0.298	2.2433e-09
CG43799	2.91496e-15	-0.467929	0.164	0.324	3.02923e-11
ATPsyndelta	3.5733e-15	-0.469566	0.134	0.288	3.71337e-11
28SrRNA-Psi:CR45851	0.000274795	-0.469979	0.24	0.304	1
mt:lrRNA	3.54514e-25	-0.472769	1	1	3.68411e-21
eIF3e	5.4524e-14	-0.473459	0.072	0.203	5.66613e-10
Rip11	8.03899e-11	-0.47439	0.5	0.52	8.35412e-07
CR43105	2.95107e-09	-0.475246	0.078	0.174	3.06675e-05
l(3)80Fj	1.96666e-14	-0.476507	0.074	0.212	2.04376e-10
eIF2beta	2.30999e-15	-0.477632	0.176	0.334	2.40054e-11
CG6310	4.69555e-27	-0.479259	0.776	0.762	4.87961e-23
ATP6AP2	1.75289e-15	-0.482249	0.138	0.296	1.8216e-11
Fkbp12	4.97549e-15	-0.484404	0.262	0.427	5.17053e-11
18SrRNA:CR45838	0.000527874	-0.487673	0.204	0.274	1
Act42A	1.48247e-39	-0.487739	1	0.983	1.54059e-35
18SrRNA:CR45841	0.000963518	-0.489681	0.204	0.27	1
18SrRNA:CR41548	0.000335837	-0.489989	0.204	0.277	1
COX5A	6.39019e-15	-0.490968	0.186	0.338	6.64068e-11
fabp	1.89368e-11	-0.491311	0.16	0.287	1.96791e-07
CG34054	1.39207e-14	-0.492525	0.07	0.205	1.44664e-10
pre-rRNA:CR45856	1.14184e-06	-0.494491	0.224	0.331	0.011866
ATPsynO	8.13333e-16	-0.495516	0.132	0.287	8.45215e-12
Men	0.737629	-0.499101	0.61	0.48	1
ND-ACP	6.31402e-17	-0.499454	0.116	0.279	6.56153e-13
SNRPG	3.39571e-16	-0.500526	0.128	0.289	3.52883e-12
ATPsynB	3.3575e-17	-0.509697	0.138	0.305	3.48911e-13
cathD	5.49499e-16	-0.512571	0.746	0.69	5.71039e-12
pre-rRNA:CR45845	8.74984e-18	-0.512807	0.3	0.524	9.09283e-14
CG10764	1.41858e-13	-0.515869	0.236	0.366	1.47419e-09
eIF1A	7.51996e-23	-0.515936	0.26	0.485	7.81474e-19
stg	2.52176e-13	-0.521617	0.262	0.403	2.62061e-09
Nepl19	2.51141e-21	-0.527242	0.2	0.406	2.60985e-17
eEF5	7.24745e-32	-0.528132	0.316	0.678	7.53155e-28
ATPsynCF6	1.82364e-21	-0.530469	0.198	0.404	1.89513e-17
DnaJ-1	1.7605e-09	-0.534517	0.346	0.406	1.82951e-05
luna	6.23541e-20	-0.540099	0.346	0.516	6.47984e-16
lncRNA:CR44316	0.963167	-0.540951	0.148	0.135	1
CG43125	5.25424e-20	-0.541187	0.12	0.297	5.4602e-16
Gel	3.84777e-15	-0.544564	0.656	0.624	3.99861e-11
Fkbp39	2.09641e-15	-0.545872	0.142	0.292	2.17859e-11
Hexo2	1.23661e-20	-0.547584	0.688	0.678	1.28509e-16
Plod	1.18476e-18	-0.549077	0.568	0.594	1.2312e-14
nAChRbeta3	7.16208e-23	-0.551522	0.514	0.618	7.44283e-19
scyl	4.13815e-18	-0.554116	0.328	0.481	4.30037e-14
Pgant9	1.08467e-16	-0.585839	0.268	0.407	1.12719e-12
UQCR-11	5.15639e-22	-0.601568	0.174	0.377	5.35852e-18
eIF4H1	4.92935e-28	-0.608636	0.268	0.522	5.12258e-24
spz	5.02894e-43	-0.619667	0.742	0.782	5.22607e-39
ATPsynbeta	4.75927e-28	-0.620406	0.25	0.496	4.94584e-24
kuz	1.07001e-28	-0.620444	0.328	0.537	1.11196e-24
COX8	1.55749e-20	-0.625975	0.214	0.394	1.61855e-16
CG34232	2.83394e-14	-0.629276	0.138	0.274	2.94503e-10
eIF4G1	1.36007e-25	-0.629545	0.188	0.411	1.41339e-21
Rap1	3.96488e-29	-0.634484	0.264	0.516	4.1203e-25
eEF1gamma	1.34567e-37	-0.640611	0.31	0.637	1.39842e-33
Ald1	9.28965e-21	-0.641588	0.234	0.442	9.65381e-17
Nepl20	4.15054e-23	-0.645384	0.088	0.281	4.31324e-19
Vap33	4.35949e-31	-0.65365	0.264	0.532	4.53038e-27
CG31777	7.94025e-28	-0.653729	0.69	0.689	8.25151e-24
l(1)G0289	4.85785e-36	-0.663411	0.274	0.566	5.04828e-32
Tep1	0.00101219	-0.669249	0.388	0.388	1
CG3961	1.41988e-19	-0.670135	0.124	0.298	1.47554e-15
COX7C	5.68901e-30	-0.670464	0.26	0.501	5.91202e-26
eEF2	1.99052e-41	-0.678345	0.314	0.672	2.06855e-37
lectin-24Db	5.51441e-27	-0.679584	0.292	0.499	5.73057e-23
Hsp70Bc	2.04976e-19	-0.680795	0.068	0.238	2.13011e-15
LanA	2.60545e-41	-0.685387	0.552	0.745	2.70758e-37
CG8501	5.58761e-47	-0.688293	0.316	0.698	5.80664e-43
eIF4A	1.83868e-42	-0.689233	0.312	0.663	1.91076e-38
Ten-m	2.91017e-31	-0.704821	0.296	0.527	3.02424e-27
Hsp68	2.30001e-15	-0.71308	0.08	0.222	2.39017e-11
COX6B	5.04908e-30	-0.72667	0.198	0.438	5.247e-26
LanB2	2.71029e-53	-0.738166	0.344	0.716	2.81653e-49
eater	2.17814e-35	-0.744584	0.436	0.624	2.26352e-31
fat-spondin	1.30526e-35	-0.755924	0.276	0.543	1.35643e-31
Tsp42Ee	7.74512e-43	-0.759119	0.384	0.644	8.04873e-39
Inos	2.85822e-30	-0.763885	0.6	0.676	2.97026e-26
ATPsynG	6.40699e-33	-0.770164	0.236	0.486	6.65814e-29
CG5397	2.12952e-40	-0.77329	0.282	0.577	2.213e-36
CG9372	1.76069e-43	-0.77856	0.29	0.572	1.82971e-39
CG4829	2.15442e-31	-0.779135	0.122	0.367	2.23887e-27
CG12065	1.97701e-13	-0.78268	0.69	0.626	2.05451e-09
eEF1beta	7.98246e-37	-0.793802	0.26	0.527	8.29537e-33
PH4alphaEFB	6.24816e-18	-0.798424	0.168	0.317	6.49309e-14
LanB1	5.04762e-64	-0.799649	0.794	0.858	5.24549e-60
Ance-5	1.10965e-40	-0.809343	0.298	0.577	1.15315e-36
Sr-CI	2.27514e-63	-0.813231	0.358	0.767	2.36432e-59
alphaTub85E	3.60512e-05	-0.827105	0.176	0.245	0.374644
CG10467	0.763547	-0.829229	0.114	0.104	1
CG42807	7.54545e-29	-0.834175	0.376	0.578	7.84123e-25
Ggamma30A	9.34237e-27	-0.836425	0.224	0.441	9.70859e-23
Tig	5.02082e-45	-0.850647	0.24	0.545	5.21764e-41
Ppn	8.24438e-77	-0.85637	0.682	0.907	8.56756e-73
Hsp23	6.64229e-27	-0.860699	0.164	0.381	6.90267e-23
Hsp26	2.48321e-31	-0.861997	0.17	0.418	2.58055e-27
vkg	4.19489e-54	-0.863407	0.346	0.758	4.35933e-50
CG34331	1.17514e-54	-0.872369	0.498	0.724	1.2212e-50
SPARC	6.71594e-56	-0.878321	0.312	0.679	6.9792e-52
lectin-24A	2.6784e-12	-0.886082	0.062	0.175	2.78339e-08
MtnA	6.13594e-05	-0.888679	0.412	0.287	0.637646
betaTub60D	0.209728	-0.90025	0.106	0.085	1
NtR	7.29603e-52	-0.907911	0.388	0.66	7.58203e-48
Ubx	3.88923e-56	-0.928919	0.306	0.678	4.04169e-52
atilla	0.000138083	-0.939333	0.032	0.076	1
28SrRNA-Psi:CR40596	2.43576e-35	-0.967098	0.19	0.467	2.53125e-31
CG1092	9.07762e-64	-0.993598	0.312	0.658	9.43346e-60
Cys	8.05719e-34	-0.993957	0.318	0.51	8.37303e-30
eEF1alpha1	1.85644e-69	-1.00159	0.316	0.692	1.92921e-65
Col4a1	1.89234e-59	-1.0063	0.312	0.683	1.96652e-55
vir-1	5.94613e-61	-1.01127	0.302	0.661	6.17922e-57
regucalcin	4.21298e-100	-1.0244	0.98	0.963	4.37813e-96
lectin-28C	7.24979e-56	-1.02752	0.28	0.647	7.53398e-52
Calr	2.57588e-53	-1.03426	0.292	0.616	2.67686e-49
NimB4	1.09786e-45	-1.05141	0.48	0.636	1.1409e-41
CG34437	4.99303e-66	-1.05241	0.238	0.625	5.18876e-62
Hml	5.72612e-87	-1.05994	0.82	0.907	5.95058e-83
lncRNA:Hsromega	1.51892e-37	-1.13125	0.102	0.373	1.57847e-33
fok	0.0451639	-1.16929	0.078	0.101	1
Pxn	1.64561e-96	-1.19829	0.39	0.808	1.71012e-92
CG43124	2.10844e-58	-1.2317	0.172	0.505	2.1911e-54
Glt	1.83035e-98	-1.24444	0.35	0.793	1.9021e-94
PPO1	0.000230323	-1.67154	0.154	0.216	1
PPO2	1.07656e-07	-1.91581	0.184	0.285	0.00111876

## Sheet: PM7
gene	cluster11.p_val	cluster11.avg_logFC	cluster11.pct.1	cluster11.pct.2	cluster11.p_val_adj
Mtk	2.33631e-57	2.76503	0.513	0.265	2.4279e-53
DptB	0	2.31152	0.24	0.01	0
Drs	3.5969e-62	2.1725	0.47	0.201	3.73789e-58
CecC	7.20077e-251	2.11373	0.777	0.188	7.48304e-247
CecA2	1.92667e-125	1.98721	0.463	0.113	2.0022e-121
AttD	3.73169e-282	1.9623	0.311	0.022	3.87798e-278
CecA1	6.56122e-161	1.6593	0.456	0.086	6.81842e-157
Dro	7.36259e-131	1.59731	0.337	0.056	7.6512e-127
CG43236	4.21253e-163	1.4007	0.865	0.306	4.37766e-159
PGRP-LB	1.07882e-196	1.34502	0.468	0.073	1.12111e-192
CG45045	0	1.22789	0.328	0.021	0
AttB	3.28429e-214	1.20215	0.311	0.029	3.41303e-210
CG33225	2.95605e-96	1.13236	0.599	0.204	3.07193e-92
Ance	7.64216e-37	1.00609	0.746	0.548	7.94173e-33
CG43175	1.88596e-39	1.00546	0.492	0.245	1.95988e-35
CecB	4.94466e-84	0.991521	0.333	0.075	5.13849e-80
CG42259	2.98923e-52	0.857259	0.29	0.084	3.10641e-48
AttA	4.89217e-233	0.850892	0.254	0.017	5.08394e-229
lncRNA:CR43855	4.20808e-15	0.847074	0.637	0.577	4.37304e-11
IM18	3.32324e-83	0.836521	0.34	0.077	3.45351e-79
Tep4	1.28469e-61	0.786651	0.836	0.542	1.33505e-57
NK7.1	1.95108e-72	0.747974	0.39	0.114	2.02756e-68
CG44250	7.78189e-32	0.730636	0.411	0.203	8.08694e-28
PGRP-SD	2.13658e-178	0.729056	0.178	0.011	2.22033e-174
Mmp1	1.2809e-29	0.711318	0.515	0.308	1.33111e-25
CG3348	3.23562e-38	0.686068	0.418	0.181	3.36245e-34
Rel	3.49564e-44	0.613778	0.67	0.385	3.63267e-40
Arc1	8.30969e-36	0.602822	0.805	0.548	8.63543e-32
asRNA:CR46093	1.62499e-56	0.595886	0.226	0.05	1.68868e-52
Gdap2	9.1165e-62	0.574771	0.406	0.132	9.47387e-58
Idgf2	1.91766e-44	0.549982	0.929	0.682	1.99283e-40
pst	1.16941e-29	0.521358	0.582	0.327	1.21525e-25
CG4250	1.75556e-57	0.520709	0.979	0.788	1.82437e-53
Lst	1.68034e-79	0.514579	0.252	0.046	1.74621e-75
CG44325	6.21607e-37	0.509032	0.209	0.06	6.45974e-33
rgn	1.68186e-25	0.50381	0.314	0.138	1.74779e-21
Lip4	4.70972e-54	0.500106	0.302	0.084	4.89434e-50
CG43210	1.03857e-24	0.492347	0.451	0.252	1.07928e-20
IP3K1	1.63495e-31	0.488115	0.439	0.209	1.69904e-27
CG8177	2.34776e-31	0.487007	0.584	0.341	2.43979e-27
CG42566	2.73234e-33	0.486005	0.817	0.575	2.83945e-29
Nrt	9.19427e-47	0.464674	0.382	0.135	9.55468e-43
ome	2.95938e-42	0.464032	0.347	0.121	3.07539e-38
teq	1.1286e-33	0.462188	0.169	0.044	1.17284e-29
Tep2	1.70955e-78	0.460628	0.271	0.054	1.77656e-74
Jra	1.07612e-14	0.459916	0.534	0.401	1.11831e-10
CG43109	3.89125e-181	0.442818	0.078	0.001	4.04379e-177
Spn55B	4.62475e-30	0.436255	0.399	0.184	4.80604e-26
CG6006	3.75399e-30	0.435433	0.361	0.153	3.90114e-26
CG5953	1.0589e-32	0.434402	0.411	0.184	1.10041e-28
yellow-c	7.12685e-146	0.432038	0.219	0.021	7.40622e-142
Gclc	5.34747e-30	0.424005	0.442	0.21	5.55709e-26
CG10126	3.38686e-27	0.422203	0.238	0.087	3.51962e-23
Gprk2	2.11107e-38	0.419067	0.489	0.219	2.19383e-34
CG16713	5.39994e-25	0.416412	0.159	0.048	5.61162e-21
Tep1	8.37512e-16	0.415868	0.58	0.383	8.70342e-12
CG42394	1.06379e-06	0.405698	0.67	0.626	0.0110549
Ets21C	2.9597e-22	0.400325	0.644	0.423	3.07572e-18
chn	2.43121e-39	0.396364	0.371	0.141	2.52652e-35
Idgf1	2.29547e-16	0.390542	0.577	0.386	2.38545e-12
CG33926	1.37105e-21	0.38623	0.164	0.055	1.42479e-17
PGRP-SC2	1.00252e-114	0.385065	0.124	0.008	1.04182e-110
CG8157	1.15951e-05	0.382025	0.815	0.799	0.120496
CG6023	2.28595e-62	0.380311	0.242	0.051	2.37556e-58
CG2865	9.54933e-16	0.370768	0.553	0.374	9.92367e-12
lncRNA:CR40469	1.06633e-13	0.367256	0.527	0.379	1.10813e-09
CG11686	5.96783e-25	0.363035	0.508	0.265	6.20177e-21
capu	2.25605e-31	0.361169	0.48	0.229	2.34449e-27
CG5399	1.52435e-11	0.360633	0.442	0.293	1.5841e-07
ZnT63C	4.21992e-28	0.358295	0.494	0.255	4.38534e-24
stv	1.33526e-68	0.355301	0.306	0.073	1.3876e-64
Su(dx)	1.66248e-29	0.35168	0.416	0.191	1.72765e-25
pirk	1.36522e-21	0.345934	0.413	0.21	1.41874e-17
Chmp1	2.68819e-20	0.34478	0.599	0.386	2.79356e-16
CG5346	4.99902e-19	0.338989	0.437	0.246	5.19498e-15
Baldspot	3.2017e-21	0.338377	0.708	0.495	3.32721e-17
CG13868	1.04022e-19	0.337736	0.468	0.269	1.081e-15
CG14322	5.8759e-34	0.331691	0.249	0.08	6.10624e-30
Psc	4.19405e-15	0.327114	0.451	0.278	4.35845e-11
Nha2	2.95061e-46	0.325052	0.109	0.016	3.06627e-42
CAP	8.26757e-37	0.324992	0.342	0.126	8.59166e-33
Had2	3.479e-09	0.320921	0.627	0.475	3.61537e-05
zfh1	8.95034e-17	0.316208	0.869	0.761	9.30119e-13
CG11236	6.6782e-77	0.314236	0.254	0.048	6.93998e-73
Rac2	5.26275e-25	0.313137	0.879	0.642	5.46905e-21
Stacl	5.53555e-56	0.305884	0.093	0.01	5.75254e-52
Mp	1.30194e-59	0.304079	0.24	0.053	1.35298e-55
vib	1.20825e-15	0.296545	0.561	0.377	1.25561e-11
CG42542	1.81288e-25	0.294644	0.475	0.241	1.88394e-21
Alh	9.00156e-23	0.294589	0.371	0.176	9.35442e-19
CHMP2B	1.54472e-30	0.294176	0.418	0.184	1.60527e-26
IP3K2	8.08399e-25	0.292068	0.257	0.1	8.40088e-21
CG13160	3.19507e-61	0.290864	0.178	0.031	3.32032e-57
RhoGAP71E	1.57041e-19	0.287741	0.594	0.368	1.63197e-15
CtsB1	7.75635e-14	0.28718	0.884	0.698	8.0604e-10
puc	4.61612e-14	0.28709	0.477	0.309	4.79707e-10
Tre1	3.66297e-37	0.286867	0.309	0.106	3.80655e-33
Glut4EF	1.60377e-27	0.283628	0.444	0.207	1.66664e-23
Spn88Ea	1.97798e-17	0.281749	0.333	0.171	2.05552e-13
prage	1.17479e-23	0.281738	0.344	0.156	1.22084e-19
olf186-M	2.8728e-18	0.275643	0.708	0.46	2.98541e-14
Pino	4.78623e-31	0.27247	0.257	0.088	4.97385e-27
Ubi-p5E	1.01325e-15	0.27055	0.739	0.52	1.05297e-11
loco	8.19021e-19	0.267551	0.496	0.286	8.51127e-15
LpR2	3.46671e-07	0.265779	0.682	0.549	0.00360261
CG45050	2.22754e-16	0.263226	0.876	0.728	2.31486e-12
GstD3	6.60514e-14	0.262021	0.603	0.405	6.86406e-10
CG42674	8.49893e-18	0.261516	0.449	0.254	8.83209e-14
RhoGEF3	2.93624e-26	0.25911	0.397	0.18	3.05134e-22
CG31174	1.58545e-17	0.258931	0.152	0.055	1.6476e-13
tx	2.29881e-24	0.257538	0.28	0.113	2.38892e-20
Fim	7.63399e-16	0.257001	0.648	0.433	7.93325e-12
CG42807	7.93514e-11	0.256109	0.686	0.57	8.24619e-07
RpL9	3.48923e-10	0.254157	0.95	0.916	3.62601e-06
Pdxk	0.00010351	0.253713	0.214	0.148	1
CG6231	8.36535e-16	0.253174	0.143	0.053	8.69328e-12
Vha16-1	4.46328e-18	0.25304	0.99	0.922	4.63824e-14
CG32368	6.96127e-14	0.251805	0.1	0.033	7.23415e-10
shrb	5.54736e-10	0.250211	0.57	0.435	5.76482e-06
VhaPPA1-1	1.91704e-12	0.249855	0.703	0.488	1.99219e-08
Nc73EF	7.16319e-19	0.246748	0.409	0.217	7.44399e-15
CG5004	1.37417e-16	0.246251	0.371	0.198	1.42804e-12
28SrRNA-Psi:CR45855	1.68005e-15	0.244752	0.309	0.154	1.7459e-11
viaf	2.74058e-15	0.242939	0.504	0.308	2.84801e-11
CG9932	2.70846e-15	0.235998	0.532	0.33	2.81463e-11
GstO3	1.88664e-13	0.235829	0.727	0.544	1.96059e-09
InR	1.24409e-22	0.234236	0.325	0.146	1.29286e-18
Vha13	1.48356e-09	0.234082	0.817	0.651	1.54172e-05
CG17574	2.24218e-07	0.233396	0.808	0.628	0.00233007
Vha100-2	9.86713e-17	0.23211	0.599	0.364	1.02539e-12
CG7523	1.84964e-18	0.232094	0.439	0.241	1.92215e-14
VhaAC45	2.81595e-05	0.231566	0.691	0.56	0.292634
lncRNA:CR34335	0.302165	0.229445	0.99	0.971	1
drk	2.32555e-15	0.225675	0.563	0.354	2.41672e-11
CG32170	4.82006e-29	0.223643	0.086	0.015	5.00901e-25
Adgf-A	3.76101e-13	0.223567	0.584	0.392	3.90844e-09
PHGPx	1.58097e-12	0.221539	0.563	0.365	1.64294e-08
Irc	3.58992e-17	0.22131	0.428	0.232	3.73065e-13
lncRNA:CR42862	3.75771e-11	0.21805	0.553	0.395	3.90501e-07
Sodh-2	1.08748e-14	0.217443	0.482	0.291	1.13011e-10
RpS14b	1.13372e-09	0.217209	0.805	0.719	1.17816e-05
Ack-like	1.1602e-22	0.215316	0.361	0.168	1.20568e-18
GILT3	3.47408e-19	0.212054	0.328	0.157	3.61026e-15
lncRNA:CR46035	5.83529e-73	0.211871	0.102	0.009	6.06403e-69
Vha36-1	1.92753e-11	0.207699	0.634	0.43	2.00309e-07
CG10376	9.79706e-18	0.207406	0.38	0.197	1.01811e-13
mthl6	4.3361e-15	0.207084	0.347	0.186	4.50607e-11
CG6126	1.06023e-15	0.206847	0.373	0.202	1.10179e-11
CG1572	1.51204e-11	0.206404	0.798	0.669	1.57131e-07
sea	1.07493e-09	0.206338	0.473	0.327	1.11706e-05
CG31523	1.79441e-14	0.20569	0.39	0.219	1.86475e-10
Vha68-2	1.16625e-05	0.204772	0.822	0.663	0.121197
tacc	2.184e-12	0.203268	0.477	0.301	2.26962e-08
PGRP-SA	1.58138e-16	0.20319	0.209	0.089	1.64337e-12
drongo	7.52345e-19	0.202308	0.425	0.222	7.81837e-15
lncRNA:CR45973	9.53083e-29	0.20179	0.164	0.046	9.90444e-25
CG14253	1.11166e-13	0.199825	0.686	0.481	1.15524e-09
Spn27A	1.91047e-09	0.199147	0.694	0.527	1.98536e-05
GstE12	7.7746e-15	0.198923	0.504	0.301	8.07936e-11
RpS18	1.93554e-09	0.197376	0.964	0.928	2.01142e-05
RpL30	1.10989e-07	0.196372	0.941	0.931	0.0011534
Vha44	1.87276e-07	0.196039	0.594	0.428	0.00194617
PGRP-LF	1.30495e-16	0.195519	0.352	0.181	1.35611e-12
spri	4.70356e-15	0.195298	0.157	0.061	4.88794e-11
28SrRNA-Psi:CR45859	5.7195e-11	0.19514	0.496	0.334	5.94371e-07
RhoGAP18B	1.32041e-14	0.194392	0.432	0.249	1.37217e-10
spict	2.80132e-16	0.194093	0.418	0.229	2.91114e-12
NimB1	3.68357e-09	0.193848	0.456	0.313	3.82796e-05
CG12112	3.41251e-17	0.193447	0.401	0.211	3.54629e-13
Vha55	1.94751e-07	0.191777	0.751	0.576	0.00202386
CG9616	1.21312e-06	0.191033	0.114	0.058	0.0126067
CG6891	8.1059e-10	0.190765	0.591	0.433	8.42365e-06
CG6299	9.86731e-21	0.189827	0.273	0.117	1.02541e-16
Eglp4	2.08702e-13	0.188595	0.451	0.271	2.16883e-09
GstE6	1.41016e-13	0.188344	0.656	0.433	1.46544e-09
Swip-1	1.08845e-14	0.188325	0.722	0.49	1.13112e-10
fend	9.34846e-07	0.187717	0.219	0.135	0.00971492
CG6701	2.33528e-14	0.187141	0.534	0.326	2.42682e-10
gem	4.80296e-12	0.187014	0.406	0.242	4.99124e-08
CG6553	0.000639126	0.186709	0.069	0.037	1
loh	3.07515e-05	0.186044	0.154	0.095	0.319569
LamC	8.35934e-08	0.185247	0.475	0.347	0.000868703
Nhe3	8.26379e-16	0.184207	0.287	0.142	8.58773e-12
l(2)gl	1.87457e-10	0.18343	0.449	0.291	1.94805e-06
CG10103	5.47682e-16	0.182588	0.411	0.227	5.69151e-12
Vago	2.27056e-67	0.1823	0.116	0.013	2.35956e-63
vari	1.49568e-14	0.181274	0.375	0.207	1.55431e-10
CG1890	4.20692e-08	0.181191	0.665	0.541	0.000437183
CG5390	5.5102e-12	0.180562	0.563	0.362	5.7262e-08
Spn88Eb	7.97899e-12	0.180518	0.482	0.302	8.29177e-08
Dbp80	1.98111e-11	0.179823	0.496	0.324	2.05877e-07
Ac76E	3.986e-41	0.179011	0.166	0.036	4.14225e-37
sle	2.29164e-11	0.178974	0.508	0.333	2.38147e-07
CG5273	9.37743e-07	0.178288	0.157	0.088	0.00974503
CG33460	1.87055e-05	0.177596	0.447	0.352	0.194388
key	1.88614e-21	0.174982	0.278	0.117	1.96007e-17
CG15098	4.52511e-11	0.174069	0.962	0.866	4.7025e-07
Akap200	4.10918e-11	0.173599	0.682	0.501	4.27026e-07
Vha14-1	5.3272e-09	0.172797	0.696	0.502	5.53602e-05
Tpi	4.66919e-22	0.172393	0.302	0.13	4.85222e-18
lncRNA:CR42715	8.59993e-40	0.172365	0.185	0.044	8.93705e-36
Hydr2	1.18039e-09	0.172353	0.242	0.134	1.22666e-05
sesB	0.000720326	0.172224	0.912	0.881	1
MCU	3.04257e-37	0.172056	0.207	0.055	3.16183e-33
Gapdh2	9.12248e-10	0.171794	0.606	0.468	9.48008e-06
stx	4.23047e-18	0.171619	0.24	0.103	4.3963e-14
Lis-1	2.70674e-11	0.17129	0.411	0.25	2.81285e-07
rho-4	7.26295e-20	0.17124	0.254	0.108	7.54766e-16
UQCR-14	1.54954e-11	0.171017	0.736	0.529	1.61028e-07
CG7668	8.60223e-13	0.170804	0.401	0.233	8.93944e-09
Lnk	1.80327e-13	0.169673	0.261	0.132	1.87396e-09
Su(z)2	5.83402e-21	0.169617	0.242	0.097	6.06271e-17
RhoGAP16F	1.16414e-10	0.169016	0.537	0.364	1.20978e-06
VhaM9.7-b	1.39832e-07	0.167949	0.815	0.654	0.00145314
lace	9.59005e-10	0.167936	0.456	0.302	9.96598e-06
VhaAC39-1	1.43008e-07	0.167497	0.572	0.41	0.00148613
stac	9.00887e-09	0.167365	0.067	0.023	9.36202e-05
lncRNA:roX1	0.000316787	0.166735	0.577	0.495	1
Xbp1	7.79722e-09	0.166535	0.734	0.593	8.10287e-05
stai	3.96477e-16	0.166532	0.171	0.067	4.12019e-12
Dhap-at	4.37183e-22	0.166531	0.233	0.09	4.5432e-18
mt:ATPase6	3.35145e-08	0.166498	0.917	0.888	0.000348283
CG12004	1.32126e-11	0.164108	0.394	0.235	1.37305e-07
CG8112	6.6918e-17	0.164078	0.309	0.15	6.95412e-13
CG31637	1.21774e-12	0.164012	0.61	0.398	1.26547e-08
QC	1.60893e-28	0.163722	0.138	0.034	1.672e-24
Arpc3B	5.10037e-08	0.163621	0.556	0.396	0.00053003
Keap1	9.68005e-20	0.162539	0.245	0.101	1.00595e-15
Nplp2	1.04643e-14	0.161267	1	0.99	1.08745e-10
bin3	1.65499e-10	0.161235	0.48	0.312	1.71987e-06
His4r	2.58977e-09	0.161193	0.817	0.695	2.69129e-05
ITP	9.41954e-09	0.161161	0.264	0.154	9.78878e-05
Csk	2.61647e-14	0.161027	0.344	0.184	2.71904e-10
cv-c	2.08333e-22	0.160308	0.259	0.103	2.16499e-18
cathD	0.00390729	0.159521	0.819	0.688	1
CG15611	9.85976e-14	0.159358	0.366	0.203	1.02463e-09
lncRNA:CR43334	9.40515e-07	0.159123	0.247	0.156	0.00977383
CG13896	6.71564e-28	0.159047	0.159	0.044	6.97889e-24
CG10433	4.13703e-26	0.157086	0.143	0.038	4.2992e-22
Spn42Da	7.0971e-16	0.156725	0.321	0.161	7.3753e-12
RpL18	4.32459e-05	0.156472	0.962	0.943	0.449411
crc	7.5376e-07	0.156217	0.629	0.513	0.00783307
Tsp66E	1.5326e-25	0.15585	0.135	0.036	1.59268e-21
Pak3	1.20228e-08	0.155017	0.606	0.438	0.000124941
AGO2	7.82399e-11	0.1538	0.48	0.309	8.13069e-07
Mec2	3.31326e-10	0.153156	0.404	0.25	3.44314e-06
RpL29	7.13142e-10	0.152554	0.99	0.952	7.41097e-06
CG32521	5.90437e-12	0.152491	0.283	0.15	6.13582e-08
Flo2	3.95029e-07	0.152307	0.385	0.263	0.00410514
CG32264	5.58489e-17	0.151889	0.302	0.144	5.80382e-13
RpS26	1.0179e-06	0.15173	0.971	0.965	0.010578
RpS6	5.19191e-05	0.151506	0.974	0.964	0.539543
CG15423	1.60043e-11	0.151093	0.076	0.024	1.66317e-07
Dhpr	2.1671e-13	0.150887	0.335	0.181	2.25205e-09
CG6180	5.39498e-09	0.150474	0.477	0.316	5.60646e-05
kraken	1.80884e-16	0.150428	0.304	0.147	1.87975e-12
CG10863	8.85036e-08	0.150339	0.565	0.405	0.000919729
CG18659	1.94543e-12	0.150267	0.318	0.175	2.02169e-08
kdn	6.94699e-08	0.150265	0.582	0.41	0.000721931
Fib	0.325111	-0.150323	0.394	0.322	1
Cnx99A	0.521815	-0.150478	0.563	0.501	1
Hex-A	0.916837	-0.150946	0.245	0.229	1
alphaCOP	0.469091	-0.151234	0.273	0.269	1
Idh	0.340754	-0.151254	0.518	0.481	1
18SrRNA-Psi:CR45861	0.929244	-0.151384	0.221	0.223	1
betaggt-II	0.971097	-0.151723	0.228	0.21	1
pyd	0.00661663	-0.151773	0.081	0.124	1
CG5828	0.712221	-0.15196	0.055	0.058	1
CG2991	0.513447	-0.152589	0.321	0.308	1
Treh	0.459045	-0.152977	0.219	0.191	1
Dp1	0.235881	-0.153024	0.66	0.589	1
cindr	0.228466	-0.153321	0.613	0.554	1
Snx3	0.34231	-0.153656	0.58	0.515	1
twr	0.106585	-0.153876	0.66	0.63	1
GluProRS	0.00202265	-0.154177	0.059	0.106	1
Hml	7.059e-05	-0.154374	0.926	0.905	0.733572
beta'COP	0.994474	-0.154445	0.323	0.286	1
pzg	0.79353	-0.15497	0.197	0.187	1
ATPsynbeta	0.00894569	-0.155128	0.439	0.491	1
pic	0.68615	-0.155177	0.221	0.211	1
AP-2mu	0.866936	-0.155367	0.373	0.327	1
18SrRNA:CR41548	0.581485	-0.155409	0.254	0.276	1
CG2915	0.5441	-0.156081	0.394	0.334	1
DppIII	0.921226	-0.156292	0.328	0.295	1
CG30414	0.120674	-0.15651	0.116	0.137	1
Caf1-55	0.0210118	-0.156797	0.15	0.192	1
Mtap	0.494153	-0.156906	0.159	0.162	1
Cat	0.389607	-0.156917	0.247	0.251	1
Pgant9	0.457227	-0.157098	0.418	0.403	1
Hsc70-5	0.80189	-0.157452	0.425	0.375	1
Droj2	0.414239	-0.15806	0.546	0.493	1
28SrRNA-Psi:CR45848	0.825681	-0.158731	0.15	0.145	1
CG46314	0.00451145	-0.158842	0.069	0.113	1
CG10602	0.101593	-0.158908	0.347	0.276	1
Sec13	0.234746	-0.158911	0.428	0.407	1
18SrRNA:CR45838	0.591846	-0.15941	0.252	0.273	1
Zasp52	0.0334812	-0.159495	0.171	0.21	1
Gyc76C	0.00359701	-0.159901	0.062	0.106	1
CG10877	0.0266613	-0.159923	0.157	0.197	1
CG8668	0.138258	-0.160383	0.176	0.191	1
Orct2	0.057441	-0.160406	0.064	0.088	1
Dek	0.623864	-0.160492	0.444	0.371	1
ref(2)P	0.50349	-0.16056	0.204	0.207	1
CG1677	0.445782	-0.160699	0.178	0.18	1
Not1	0.332528	-0.160848	0.608	0.541	1
luna	0.131382	-0.160901	0.518	0.511	1
ThrRS	0.0234262	-0.160909	0.138	0.177	1
eater	0.0954971	-0.161005	0.641	0.619	1
CG9302	0.558345	-0.161233	0.366	0.338	1
CG9171	0.473083	-0.161414	0.335	0.315	1
CG8080	0.962905	-0.161711	0.219	0.201	1
18SrRNA:CR45841	0.67864	-0.162	0.252	0.269	1
Pits	0.716245	-0.162037	0.24	0.229	1
mkg-p	0.0507031	-0.162369	0.116	0.147	1
GlcAT-P	0.25997	-0.162426	0.435	0.428	1
CG12535	0.11418	-0.162992	0.105	0.126	1
Cndp2	0.436475	-0.163843	0.696	0.604	1
CG30090	0.00602573	-0.164025	0.278	0.201	1
Atf6	0.530592	-0.164338	0.247	0.239	1
capt	0.331229	-0.164345	0.665	0.587	1
His3.3B	0.155158	-0.164408	0.812	0.719	1
CrebA	0.866362	-0.164536	0.416	0.368	1
lncRNA:CR45184	0.00457223	-0.164553	0.086	0.133	1
Grasp65	0.845047	-0.164982	0.264	0.233	1
Bap111	0.00964714	-0.165222	0.071	0.109	1
mbf1	0.543044	-0.165612	0.475	0.421	1
Tapdelta	0.00659986	-0.165743	0.715	0.706	1
Sod1	0.0284639	-0.166486	0.285	0.324	1
Spp	0.416698	-0.167086	0.513	0.47	1
NimB2	0.00509748	-0.167267	0.074	0.116	1
srp	0.575447	-0.168713	0.57	0.5	1
eff	5.1833e-05	-0.168897	0.931	0.881	0.538649
CG12744	0.0377527	-0.169262	0.112	0.143	1
cnn	0.0225494	-0.16929	0.083	0.115	1
RhoGAP68F	0.617652	-0.16935	0.309	0.289	1
CG34331	6.81631e-05	-0.169435	0.682	0.719	0.708351
crol	0.499803	-0.169845	0.42	0.387	1
CG15093	0.271192	-0.170007	0.613	0.553	1
ATPsyndelta	0.0374493	-0.170777	0.247	0.285	1
zip	0.000169478	-0.170842	0.836	0.786	1
GCS2beta	0.305288	-0.172191	0.489	0.451	1
Mnt	0.533097	-0.173914	0.162	0.161	1
CG32638	0.0841864	-0.175317	0.207	0.234	1
Npc2g	0.142041	-0.175484	0.109	0.127	1
Arpc2	0.136526	-0.176133	0.546	0.506	1
CG33057	0.00704767	-0.176158	0.076	0.118	1
eIF3j	0.0232848	-0.176845	0.202	0.245	1
AlaRS	0.00170556	-0.177289	0.102	0.158	1
CG10638	0.636715	-0.177463	0.344	0.32	1
ItgaPS5	0.0161744	-0.178477	0.119	0.161	1
Slik	0.00108627	-0.178531	0.164	0.232	1
Sgsh	0.000175319	-0.17939	0.019	0.063	1
Tgi	0.0871106	-0.179798	0.19	0.219	1
mt:ND1	0.00132177	-0.180351	0.945	0.88	1
CG17928	0.00184646	-0.18039	0.083	0.133	1
Mes2	0.422681	-0.180775	0.287	0.277	1
IscU	0.798299	-0.181586	0.48	0.395	1
sn	0.00332429	-0.181832	0.062	0.105	1
TER94	0.185452	-0.182089	0.615	0.546	1
pre-rRNA:CR45847	0.0231848	-0.182201	0.295	0.365	1
Tsp42Ee	8.27164e-05	-0.182756	0.582	0.638	0.859588
Dsp1	0.145662	-0.182955	0.304	0.311	1
prtp	0.0930654	-0.183235	0.508	0.476	1
HnRNP-K	9.42987e-05	-0.183631	0.05	0.111	0.979952
kuz	0.0100651	-0.184313	0.506	0.532	1
O-fut1	0.273369	-0.184947	0.254	0.253	1
eIF3h	0.00650542	-0.185001	0.133	0.183	1
crp	0.935474	-0.185412	0.34	0.306	1
GstE2	0.0623142	-0.186274	0.261	0.2	1
kek1	0.0637031	-0.18686	0.145	0.172	1
Fkbp39	0.0873476	-0.18712	0.264	0.289	1
Pdk	0.0778433	-0.187171	0.143	0.166	1
Tudor-SN	0.0233767	-0.188514	0.625	0.588	1
Idh3a	0.0114662	-0.188725	0.245	0.298	1
sano	0.0100167	-0.188816	0.033	0.063	1
corn	0.509219	-0.189056	0.2	0.197	1
Got2	0.187339	-0.189694	0.52	0.47	1
Gadd45	0.62217	-0.189765	0.468	0.401	1
CG1628	0.122654	-0.190609	0.116	0.134	1
mamo	0.572522	-0.191531	0.525	0.459	1
eIF4G1	0.0107013	-0.192264	0.361	0.406	1
lola	0.022804	-0.192547	0.58	0.557	1
Hsp60A	0.0335518	-0.192576	0.323	0.361	1
CG9328	0.800247	-0.193536	0.423	0.375	1
Ubqn	0.207436	-0.194727	0.439	0.415	1
Fdh	0.0123748	-0.195162	0.53	0.506	1
Gale	0.0100651	-0.196113	0.651	0.609	1
CG5377	0.892465	-0.196343	0.278	0.249	1
br	0.771961	-0.196967	0.335	0.308	1
Ahcy	0.00726126	-0.1971	0.154	0.204	1
mthl2	0.924015	-0.197405	0.513	0.442	1
ct	0.0181976	-0.198514	0.561	0.538	1
sgl	0.184503	-0.198859	0.33	0.322	1
Echs1	0.0106895	-0.199134	0.665	0.625	1
CG42322	0.00861469	-0.200522	0.114	0.16	1
Chrac-16	0.00307946	-0.200523	0.074	0.118	1
CG5885	0.00980608	-0.200668	0.67	0.642	1
Pgant6	0.000397608	-0.200862	0.078	0.138	1
CG8745	0.000228167	-0.200913	0.069	0.131	1
Lam	0.0452477	-0.201441	0.684	0.607	1
Wdfy2	0.314853	-0.202028	0.413	0.378	1
Gip	0.0106257	-0.202139	0.271	0.199	1
28SrRNA-Psi:CR40596	0.303928	-0.205603	0.451	0.46	1
eIF3a	0.0176607	-0.20591	0.29	0.333	1
tral	0.238657	-0.206	0.33	0.32	1
CaBP1	0.0468161	-0.207304	0.694	0.649	1
hoe1	0.00617664	-0.207942	0.076	0.117	1
Mpcp2	0.00243786	-0.208165	0.416	0.465	1
CG5854	0.0256475	-0.209697	0.401	0.415	1
Hsp83	0.000412562	-0.210003	0.926	0.887	1
Naa15-16	0.000332928	-0.210424	0.09	0.152	1
PyK	0.0428327	-0.210606	0.553	0.521	1
eIF4B	0.00113939	-0.210852	0.19	0.256	1
Rpn8	0.280404	-0.211959	0.401	0.371	1
bru3	0.0560417	-0.21236	0.097	0.126	1
CG10859	0.000837636	-0.213206	0.083	0.138	1
Trx-2	4.0722e-06	-0.214722	0.855	0.804	0.0423183
EcR	0.12896	-0.214921	0.145	0.163	1
pnt	2.85132e-05	-0.216183	0.399	0.485	0.29631
cher	0.256881	-0.218338	0.639	0.553	1
CG9372	3.24076e-05	-0.219508	0.492	0.566	0.33678
eIF4H1	0.000412524	-0.21988	0.454	0.516	1
eEF1beta	7.74215e-05	-0.220009	0.435	0.523	0.804564
path	0.371817	-0.220751	0.169	0.175	1
CG4829	0.000139318	-0.220855	0.271	0.363	1
CG8468	0.4616	-0.22098	0.261	0.245	1
chrb	0.00265649	-0.220994	0.071	0.116	1
Stt3A	0.283677	-0.223163	0.435	0.401	1
prominin-like	0.615692	-0.224211	0.359	0.329	1
Ndf	0.070696	-0.226785	0.399	0.385	1
CG6512	0.105855	-0.227391	0.192	0.209	1
udd	0.179908	-0.228738	0.309	0.317	1
Ance-5	2.03858e-06	-0.229464	0.461	0.573	0.0211849
CG5973	0.000733883	-0.229565	0.247	0.318	1
CG2852	6.85242e-15	-0.231118	0.971	0.963	7.12104e-11
eIF3b	0.000447529	-0.231809	0.283	0.355	1
LanB1	1.48105e-07	-0.231981	0.862	0.856	0.00153911
CG12133	0.368398	-0.233547	0.062	0.07	1
Orct	9.02066e-05	-0.233651	0.076	0.141	0.937427
dom	0.400433	-0.234876	0.328	0.301	1
CG1910	0.0454374	-0.23499	0.556	0.511	1
Vap33	0.000110906	-0.238338	0.454	0.527	1
Stt3B	0.00164383	-0.239822	0.264	0.324	1
lncRNA:Hsromega	0.00394611	-0.241784	0.302	0.367	1
Inos	0.00323096	-0.241788	0.696	0.674	1
ush	0.00828807	-0.242252	0.171	0.217	1
fabp	0.0466292	-0.242283	0.259	0.285	1
l(1)G0289	2.21452e-05	-0.243011	0.475	0.56	0.230133
His2Av	4.90258e-05	-0.243472	0.715	0.708	0.509476
Ten-m	4.52058e-05	-0.244165	0.442	0.523	0.469779
Pvr	0.0182069	-0.244179	0.347	0.365	1
RnrS	0.0380151	-0.244296	0.216	0.244	1
Stat92E	0.200452	-0.244478	0.485	0.432	1
CCT6	8.47429e-05	-0.244906	0.185	0.268	0.880648
N	0.0707196	-0.245066	0.385	0.383	1
ham	0.179999	-0.245547	0.242	0.246	1
eIF1A	0.000414563	-0.245573	0.418	0.481	1
CG7860	0.851175	-0.245844	0.057	0.059	1
Act42A	1.6832e-07	-0.246151	0.993	0.983	0.00174918
glec	6.7069e-05	-0.246597	0.078	0.146	0.696981
scf	9.37352e-06	-0.25021	0.715	0.693	0.0974096
Bacc	3.7473e-05	-0.250224	0.846	0.85	0.38942
Nepl20	1.30211e-05	-0.251951	0.183	0.278	0.135315
pre-rRNA:CR45845	7.83614e-05	-0.252062	0.409	0.52	0.814332
SsRbeta	0.00211889	-0.25378	0.544	0.539	1
sel	0.161031	-0.254503	0.418	0.388	1
pre-rRNA:CR45856	0.0321635	-0.254661	0.271	0.33	1
cwo	0.0193436	-0.255859	0.211	0.241	1
agt	0.000103607	-0.255915	0.145	0.223	1
CG31673	0.00608451	-0.25704	0.242	0.286	1
Hsp68	0.0108144	-0.257109	0.173	0.22	1
Myo61F	0.0097304	-0.257133	0.587	0.549	1
CCT5	0.0001253	-0.258491	0.292	0.371	1
tna	0.00306508	-0.258988	0.107	0.156	1
CG9331	0.0106842	-0.259026	0.542	0.515	1
Rip11	0.00869202	-0.26086	0.563	0.519	1
eIF4E1	0.000312862	-0.261392	0.259	0.331	1
CR43482	2.43449e-05	-0.261618	0.026	0.082	0.252992
Traf-like	0.0102489	-0.261626	0.233	0.273	1
CCT7	2.81713e-05	-0.262238	0.219	0.31	0.292756
28SrRNA-Psi:CR40741	0.465046	-0.263406	0.152	0.158	1
eRF3	0.00130185	-0.263913	0.185	0.246	1
pre-rRNA:CR45846	0.00603516	-0.263915	0.287	0.36	1
Ran	1.67632e-09	-0.264311	0.86	0.842	1.74203e-05
CG10469	0.00571721	-0.265605	0.052	0.091	1
CG5397	9.31823e-07	-0.265871	0.47	0.572	0.00968351
Snx6	0.0703086	-0.266263	0.435	0.411	1
Ctr1A	0.147352	-0.266829	0.19	0.21	1
mthl4	0.970091	-0.267833	0.164	0.152	1
lncRNA:CR44316	0.00473423	-0.268267	0.192	0.134	1
Hsp70Bb	0.00023637	-0.268811	0.04	0.091	1
Fkbp14	0.000982359	-0.273735	0.515	0.52	1
C1GalTA	0.000148766	-0.274206	0.183	0.256	1
vir-1	8.86472e-07	-0.274397	0.539	0.655	0.00921221
GCS2alpha	0.00136618	-0.275833	0.629	0.592	1
Nepl21	8.48609e-06	-0.27981	0.164	0.257	0.0881875
CG5888	0.00221673	-0.280203	0.176	0.223	1
Calr	2.40976e-06	-0.281507	0.511	0.61	0.0250423
LKRSDH	0.00128475	-0.281727	0.157	0.214	1
Syp	3.61147e-06	-0.283885	0.803	0.769	0.0375304
Hsp70Ba	2.25733e-05	-0.286076	0.017	0.068	0.234581
PH4alphaEFB	0.0707837	-0.286202	0.292	0.314	1
Sec61alpha	7.40462e-06	-0.286539	0.698	0.69	0.0769489
scyl	1.64016e-05	-0.28772	0.392	0.479	0.170446
bt	0.000156725	-0.290568	0.048	0.103	1
Hsp70Aa	0.000168558	-0.290672	0.048	0.102	1
Gal	0.000122932	-0.290963	0.095	0.161	1
Hsp70Bbb	2.40016e-05	-0.291742	0.017	0.068	0.249425
Hsp70Ab	0.000268105	-0.29276	0.052	0.105	1
Ubx	1.58554e-08	-0.292822	0.563	0.671	0.000164769
CG34054	0.000109404	-0.294235	0.133	0.203	1
Gp93	4.27032e-05	-0.294466	0.755	0.73	0.443771
Fkbp59	0.0770279	-0.297428	0.164	0.191	1
eIF3m	5.20389e-06	-0.298917	0.223	0.32	0.0540789
Plod	2.11799e-06	-0.298942	0.565	0.594	0.0220101
Lon	0.0225723	-0.298991	0.316	0.335	1
Myc	0.000158103	-0.30221	0.266	0.339	1
HINT1	1.02906e-05	-0.302517	0.309	0.391	0.10694
NimC1	0.000191177	-0.304627	0.152	0.223	1
eIF4A	4.90504e-09	-0.306228	0.558	0.656	5.09732e-05
CCT1	7.36165e-07	-0.30862	0.197	0.302	0.00765022
DnaJ-1	0.000421306	-0.311654	0.356	0.406	1
eIF2alpha	1.66698e-05	-0.313187	0.223	0.308	0.173233
CG43125	3.55718e-07	-0.315862	0.192	0.295	0.00369662
CG1092	2.45274e-10	-0.31634	0.53	0.652	2.54889e-06
kar	3.92241e-06	-0.317343	0.05	0.121	0.0407617
PPO3	0.0155121	-0.31857	0.026	0.052	1
Pdi	8.55358e-22	-0.319367	0.955	0.952	8.88888e-18
Ugt37D1	5.37845e-06	-0.319736	0.093	0.173	0.0558928
CG10764	1.9513e-05	-0.321782	0.292	0.365	0.202779
CG34437	7.58458e-11	-0.326267	0.475	0.618	7.8819e-07
fat-spondin	8.4128e-08	-0.327056	0.425	0.538	0.000874258
EGFP	0.00102179	-0.32945	0.283	0.352	1
E(spl)mbeta-HLH	0.0251068	-0.329844	0.24	0.265	1
Atox1	0.343546	-0.33842	0.432	0.355	1
HmgD	1.4832e-10	-0.338525	0.789	0.809	1.54134e-06
SPARC	1.41168e-11	-0.340888	0.563	0.672	1.46701e-07
eEF5	1.37557e-10	-0.35046	0.558	0.671	1.42949e-06
CG15347	7.5571e-09	-0.350647	0.387	0.237	7.85334e-05
eEF1gamma	3.66311e-09	-0.359292	0.532	0.631	3.80671e-05
CCT3	1.76813e-07	-0.361408	0.249	0.364	0.00183745
Nepl19	1.69994e-07	-0.36372	0.299	0.403	0.00176657
lncRNA:CR42491	0.0277966	-0.373713	0.359	0.358	1
LManII	1.07779e-07	-0.381863	0.152	0.26	0.00112004
eEF1alpha1	5.97401e-17	-0.383945	0.565	0.685	6.20819e-13
lectin-24A	0.069458	-0.388717	0.147	0.172	1
LanA	9.19883e-12	-0.390649	0.694	0.741	9.55942e-08
Men	0.512866	-0.39918	0.568	0.482	1
Pxn	2.97166e-19	-0.399599	0.67	0.8	3.08815e-15
Hsc70-3	9.45982e-12	-0.403038	0.884	0.889	9.83064e-08
LanB2	8.72824e-13	-0.407269	0.591	0.709	9.07039e-09
spz	4.21761e-18	-0.407596	0.734	0.782	4.38294e-14
Ald1	3.94877e-05	-0.408009	0.366	0.439	0.410356
ERp60	5.76868e-31	-0.444031	0.945	0.95	5.99481e-27
eEF2	3.22498e-16	-0.452885	0.553	0.665	3.3514e-12
stg	5.13659e-08	-0.453013	0.292	0.402	0.000533795
regucalcin	1.22201e-24	-0.453582	0.967	0.964	1.26992e-20
Tig	1.44796e-14	-0.482747	0.392	0.541	1.50472e-10
Hsp27	1.58225e-05	-0.483128	0.295	0.346	0.164427
Glt	3.19195e-25	-0.486387	0.608	0.785	3.31707e-21
Hsp70Bc	1.18683e-09	-0.497678	0.112	0.236	1.23335e-05
Uhg7	1.72466e-05	-0.498556	0.292	0.371	0.179227
Snoo	0.0349732	-0.527108	0.416	0.409	1
Abl	0.191978	-0.591751	0.506	0.459	1
alphaTub85E	0.205141	-0.598047	0.228	0.244	1
Hsp23	1.01301e-12	-0.598203	0.221	0.379	1.05272e-08
Ppn	8.52877e-31	-0.598841	0.846	0.902	8.86309e-27
Col4a1	3.90742e-23	-0.637058	0.565	0.676	4.06059e-19
Hsp26	8.90512e-12	-0.640969	0.285	0.415	9.2542e-08
Ggamma30A	4.81408e-16	-0.70395	0.268	0.44	5.00279e-12
CG43124	9.04233e-20	-0.775192	0.342	0.499	9.39679e-16
vkg	2.62999e-23	-0.80427	0.601	0.75	2.73309e-19
CG10467	0.636241	-0.811114	0.116	0.104	1
betaTub60D	0.386712	-0.822109	0.1	0.086	1
atilla	0.00159198	-0.85947	0.036	0.075	1
MtnA	0.24324	-0.943783	0.352	0.289	1
fok	0.00247557	-1.22395	0.059	0.102	1
PPO1	8.85397e-05	-1.76979	0.14	0.216	0.920104
PPO2	8.94514e-07	-2.24166	0.183	0.284	0.00929579

## Sheet: PM8
gene	cluster8.p_val	cluster8.avg_logFC	cluster8.pct.1	cluster8.pct.2	cluster8.p_val_adj
Prx2540-1	0	1.4717	0.633	0.024	0
CG12896	0	1.16506	0.492	0.009	0
Prx2540-2	0	1.16178	0.532	0.013	0
Mlc2	2.46194e-14	0.565727	0.054	0.015	2.55845e-10
NimB4	4.40978e-22	0.368556	0.763	0.627	4.58265e-18
Inos	3.11949e-17	0.332757	0.767	0.671	3.24177e-13
Nepl20	5.09836e-15	0.323846	0.408	0.271	5.29822e-11
CG34437	4.3471e-20	0.323279	0.752	0.61	4.51751e-16
fat-spondin	5.48032e-16	0.304004	0.66	0.532	5.69515e-12
lectin-28C	1.71352e-17	0.301606	0.754	0.633	1.78069e-13
regucalcin	1.10753e-30	0.301129	0.994	0.963	1.15094e-26
eater	9.06906e-17	0.28415	0.748	0.615	9.42456e-13
Hml	2.95895e-24	0.282337	0.979	0.903	3.07494e-20
Pxn	1.96158e-20	0.280895	0.905	0.793	2.03848e-16
Dad1	4.61161e-11	0.275263	0.41	0.291	4.79239e-07
CG34331	9.95518e-17	0.2741	0.827	0.715	1.03454e-12
CG3961	1.11095e-12	0.270832	0.419	0.289	1.1545e-08
Tig	1.66104e-17	0.260604	0.697	0.532	1.72615e-13
Glt	2.53701e-17	0.255843	0.883	0.778	2.63646e-13
Nepl19	1.66398e-14	0.252798	0.549	0.395	1.72921e-10
CG42369	8.53905e-11	0.248569	0.41	0.291	8.87378e-07
CG1092	9.71101e-13	0.247936	0.752	0.646	1.00917e-08
Calr	3.14112e-11	0.246518	0.705	0.605	3.26425e-07
Gel	3.08978e-17	0.243837	0.752	0.62	3.2109e-13
Ugt37D1	3.51164e-14	0.242026	0.283	0.168	3.64929e-10
Cys	1.45838e-11	0.241568	0.622	0.501	1.51554e-07
LManI	4.22073e-10	0.240593	0.379	0.271	4.38618e-06
SPARC	9.24893e-15	0.240406	0.768	0.666	9.61149e-11
lncRNA:Hsromega	1.09861e-08	0.237893	0.468	0.362	0.000114168
Plod	1.5103e-10	0.237397	0.69	0.591	1.56951e-06
CG31075	1.05714e-12	0.235429	0.689	0.572	1.09858e-08
NtR	5.1821e-14	0.229393	0.783	0.648	5.38524e-10
UQCR-11	1.5213e-09	0.221646	0.483	0.368	1.58094e-05
Ance-5	2.51574e-11	0.217681	0.689	0.566	2.61436e-07
LManII	4.76426e-07	0.21271	0.341	0.255	0.00495102
Cyp9f2	1.10927e-07	0.211215	0.346	0.257	0.00115275
CG42807	9.78775e-11	0.206528	0.695	0.569	1.01714e-06
Gs1	5.47766e-09	0.203533	0.229	0.145	5.69239e-05
CG15093	1.62893e-09	0.201454	0.649	0.551	1.69278e-05
CG34232	5.79518e-07	0.201232	0.357	0.268	0.00602235
Hexo2	3.85397e-09	0.200496	0.737	0.677	4.00505e-05
Aldh	3.02225e-10	0.199779	0.74	0.664	3.14072e-06
CG43799	9.62421e-09	0.199334	0.425	0.317	0.000100015
Nplp2	2.8645e-12	0.198511	0.998	0.99	2.97679e-08
Col4a1	3.33926e-10	0.196974	0.77	0.67	3.47016e-06
Idgf6	5.0019e-21	0.195713	0.962	0.936	5.19798e-17
fabp	2.23097e-05	0.195564	0.359	0.282	0.231843
nAChRbeta3	1.43875e-09	0.195298	0.714	0.612	1.49515e-05
CG17839	8.09866e-10	0.194995	0.271	0.175	8.41613e-06
Ugt317A1	5.31538e-07	0.194715	0.273	0.194	0.00552375
CG5397	4.2318e-10	0.192821	0.676	0.566	4.39768e-06
CG5973	1.55268e-06	0.192562	0.4	0.313	0.0161355
Gal	2.00309e-10	0.192487	0.254	0.156	2.08162e-06
CG31337	3.67025e-13	0.191558	0.846	0.752	3.81412e-09
CR43105	1.11661e-07	0.189559	0.251	0.169	0.00116038
ubl	3.79321e-05	0.189373	0.343	0.277	0.394191
Stt3B	1.93108e-07	0.186836	0.417	0.319	0.00200678
LanB1	2.98719e-13	0.186627	0.933	0.854	3.10429e-09
CG8306	3.77674e-08	0.186192	0.183	0.113	0.000392479
CG3902	5.54078e-07	0.184939	0.422	0.338	0.00575798
CG42711	8.44363e-09	0.184238	0.578	0.46	8.77463e-05
kud	1.88406e-05	0.1835	0.537	0.472	0.195792
eIF4G2	0.000751973	0.183483	0.27	0.221	1
Msp300	6.60967e-09	0.177139	0.916	0.885	6.86877e-05
CG6310	7.65002e-12	0.17681	0.852	0.759	7.9499e-08
Pgant9	3.47435e-07	0.176562	0.497	0.4	0.00361055
CG2444	8.82567e-09	0.17559	0.221	0.14	9.17164e-05
Pdxk	9.35747e-10	0.174622	0.238	0.146	9.72429e-06
drpr	8.73379e-06	0.174298	0.384	0.305	0.0907615
kar	3.25579e-05	0.172055	0.171	0.118	0.338342
COX8	6.80812e-07	0.170971	0.483	0.387	0.00707499
Had2	3.54873e-08	0.170896	0.592	0.475	0.000368784
CG42748	4.74531e-06	0.166621	0.27	0.199	0.0493132
MP1	8.7482e-06	0.166294	0.29	0.218	0.0909113
lectin-24Db	3.03526e-06	0.165822	0.583	0.491	0.0315424
CG13585	2.57398e-06	0.165696	0.554	0.479	0.0267488
eIF2gamma	2.72285e-06	0.16519	0.208	0.141	0.0282958
COX6B	1.8606e-06	0.165077	0.522	0.429	0.0193353
CDase	2.46296e-07	0.164312	0.159	0.097	0.00255951
26-29-p	4.61794e-07	0.164241	0.646	0.573	0.00479896
lncRNA:roX1	1.19958e-05	0.163914	0.586	0.493	0.12466
LanA	1.45904e-09	0.163369	0.833	0.737	1.51623e-05
hoe1	4.84806e-07	0.161088	0.179	0.114	0.0050381
Cndp2	3.88548e-09	0.160446	0.713	0.603	4.03779e-05
Sr-CI	1.70457e-08	0.159834	0.838	0.754	0.000177139
CG5854	4.99362e-06	0.158604	0.497	0.412	0.0518937
COX7C	1.58146e-05	0.158097	0.575	0.493	0.164346
luna	5.02535e-06	0.157226	0.597	0.509	0.0522234
NimB2	3.48399e-05	0.156141	0.167	0.113	0.362056
CG1910	6.84023e-05	0.156122	0.573	0.51	0.710837
CG1275	0.00191411	0.156085	0.179	0.138	1
eIF2beta	2.7045e-06	0.151811	0.422	0.327	0.0281051
ATPsynG	8.64339e-06	0.151301	0.567	0.476	0.0898221
Syx7	1.01233e-05	-0.150685	0.076	0.139	0.105202
flr	0.000446372	-0.151727	0.34	0.409	1
Baldspot	0.000308376	-0.151735	0.443	0.502	1
Trx-2	4.05986e-05	-0.15187	0.789	0.806	0.4219
Rs1	0.000802594	-0.152073	0.149	0.202	1
CG43179	4.45129e-06	-0.152285	0.017	0.061	0.0462578
Nc73EF	5.76194e-05	-0.152846	0.156	0.224	0.598781
Arc2	0.00304292	-0.155435	0.137	0.181	1
Nph	0.156028	-0.156135	0.481	0.472	1
NAT1	0.000521676	-0.156828	0.41	0.464	1
mthl2	0.205238	-0.157078	0.44	0.443	1
Gprk2	0.0108737	-0.157352	0.187	0.226	1
CCT8	0.00162543	-0.1577	0.467	0.513	1
CG4793	0.00264491	-0.158056	0.105	0.147	1
Chd64	2.22463e-09	-0.158704	0.978	0.974	2.31184e-05
18SrRNA-Psi:CR41602	0.0291104	-0.159165	0.413	0.452	1
tsr	1.18855e-06	-0.159393	0.975	0.967	0.0123514
spir	1.54886e-06	-0.160099	0.04	0.097	0.0160957
Rel	0.00457487	-0.160476	0.341	0.393	1
Hsc70-4	6.94534e-08	-0.160815	0.905	0.921	0.00072176
Eb1	0.00129674	-0.161507	0.451	0.502	1
AdSS	2.35528e-05	-0.162418	0.23	0.311	0.244761
mew	0.000164456	-0.162534	0.095	0.15	1
Rab11	3.544e-05	-0.162621	0.77	0.791	0.368293
CG42455	0.000281133	-0.162623	0.159	0.218	1
ssp2	6.93804e-07	-0.162665	0.06	0.127	0.00721001
C3G	0.000163985	-0.163995	0.157	0.221	1
sea	0.000749268	-0.164092	0.265	0.332	1
bin3	0.0470779	-0.164102	0.292	0.316	1
AnxB9	0.000542971	-0.164471	0.737	0.749	1
CG43210	0.000380851	-0.164636	0.197	0.259	1
olf186-F	0.000127901	-0.165262	0.137	0.197	1
CG17760	0.00301748	-0.165429	0.2	0.25	1
CG7215	0.000656614	-0.167828	0.189	0.244	1
sesB	0.000124329	-0.167844	0.875	0.882	1
alphaTub84B	2.88142e-05	-0.170602	0.91	0.921	0.299438
CG5953	2.52147e-05	-0.170836	0.122	0.191	0.262031
CG9253	3.16818e-05	-0.171003	0.152	0.223	0.329238
Spn88Eb	0.00099698	-0.172208	0.252	0.308	1
CG33460	0.00119715	-0.172718	0.297	0.356	1
Ctr1A	0.212868	-0.174391	0.192	0.21	1
Pvf2	4.56279e-06	-0.174768	0.043	0.097	0.0474165
CG11357	0.000519265	-0.175346	0.357	0.417	1
chic	7.80116e-11	-0.17553	0.957	0.966	8.10697e-07
Vrp1	5.21301e-05	-0.176013	0.092	0.152	0.541736
CG4511	4.12741e-05	-0.176667	0.237	0.31	0.428921
nop5	0.000283232	-0.177997	0.302	0.366	1
CNBP	5.5349e-06	-0.179767	0.903	0.905	0.0575186
mod	0.00874515	-0.180643	0.46	0.49	1
Fim	0.00109594	-0.183889	0.389	0.439	1
puc	0.00167829	-0.185318	0.26	0.314	1
lectin-24A	0.06462	-0.186437	0.144	0.173	1
PCNA	0.000164319	-0.186526	0.208	0.276	1
sd	3.58136e-05	-0.187249	0.205	0.277	0.372175
tna	0.0162256	-0.189772	0.122	0.156	1
CG8177	0.000601578	-0.193091	0.289	0.348	1
Jra	9.6679e-05	-0.19329	0.337	0.407	1
Gapdh2	0.0120794	-0.193477	0.435	0.472	1
CG9932	0.116811	-0.1949	0.319	0.335	1
Mob2	2.17333e-05	-0.195351	0.21	0.283	0.225852
Arc1	0.0991185	-0.196141	0.546	0.553	1
Tep4	0.445137	-0.196698	0.552	0.548	1
Dyak-FKBP59	0.000550324	-0.197502	0.195	0.253	1
Df31	1.6601e-06	-0.197665	0.817	0.844	0.0172518
CG7956	9.75093e-08	-0.198218	0.032	0.094	0.00101332
prage	1.02827e-05	-0.199313	0.098	0.162	0.106858
Nrt	0.00014341	-0.202524	0.089	0.142	1
Gip	0.216488	-0.20311	0.183	0.201	1
CG13096	2.40622e-05	-0.203232	0.2	0.273	0.250055
CG10469	0.0817956	-0.203892	0.071	0.091	1
CG12112	4.44473e-05	-0.204101	0.152	0.217	0.461896
RhoGAP18B	4.58088e-05	-0.204216	0.189	0.255	0.476045
CG33494	4.16265e-07	-0.204397	0.679	0.726	0.00432583
CG42566	0.260663	-0.205348	0.589	0.579	1
Mtk	0.238982	-0.20745	0.256	0.271	1
Nop60B	0.000177196	-0.207961	0.378	0.439	1
Lip4	5.77168e-07	-0.20873	0.033	0.091	0.00599793
Naxd	0.00135576	-0.208766	0.148	0.199	1
CG2865	0.00189895	-0.20925	0.329	0.379	1
Gclc	4.57598e-05	-0.210819	0.152	0.217	0.475536
28SrRNA-Psi:CR45859	0.0905073	-0.214215	0.313	0.338	1
CG1890	0.00055721	-0.215174	0.519	0.544	1
cl	0.000108631	-0.215749	0.513	0.554	1
path	1.27742e-05	-0.219523	0.111	0.177	0.132749
Pfdn5	1.59892e-05	-0.21981	0.294	0.367	0.16616
CG7860	0.228916	-0.222384	0.048	0.059	1
Droj2	8.9585e-06	-0.22303	0.429	0.497	0.0930968
Act5C	2.40635e-13	-0.224537	0.998	0.992	2.50068e-09
tx	5.67353e-06	-0.224756	0.06	0.119	0.0589593
loco	1.19646e-05	-0.225619	0.221	0.293	0.124336
CAP	2.22607e-08	-0.226092	0.057	0.134	0.000231333
IP3K1	1.10909e-05	-0.228342	0.146	0.216	0.115257
CG44250	0.00145412	-0.230995	0.16	0.209	1
CG32066	3.98117e-05	-0.231869	0.225	0.291	0.413723
NK7.1	7.36948e-08	-0.234625	0.052	0.123	0.000765836
CG13117	0.00047473	-0.236369	0.603	0.624	1
hebe	5.2901e-09	-0.241321	0.032	0.103	5.49748e-05
rgn	4.56077e-06	-0.242118	0.081	0.144	0.0473955
Atox1	0.69877	-0.243577	0.37	0.356	1
Cyt-c-p	2.90962e-07	-0.246251	0.446	0.532	0.00302368
CG17841	5.27142e-08	-0.246407	0.114	0.202	0.000547806
shot	6.77613e-05	-0.250297	0.283	0.358	0.704176
CG12133	5.20867e-05	-0.252997	0.03	0.071	0.541285
CG1648	9.6798e-06	-0.260659	0.149	0.22	0.100592
Glut4EF	2.73886e-07	-0.260705	0.132	0.215	0.00284622
Ssrp	9.04841e-06	-0.26917	0.267	0.338	0.0940311
Men	0.702851	-0.270743	0.495	0.483	1
RapGAP1	0.00694524	-0.273644	0.386	0.421	1
CG6023	0.000690198	-0.275468	0.025	0.057	1
Cam	1.11594e-14	-0.285505	0.948	0.953	1.15969e-10
Dyak-FK506-bp2	3.04729e-07	-0.293434	0.3	0.393	0.00316674
Ggamma30A	0.00186375	-0.312555	0.403	0.437	1
Dro	0.0054484	-0.334766	0.037	0.063	1
mys	2.04467e-07	-0.335179	0.4	0.478	0.00212482
LamC	1.03295e-07	-0.340087	0.26	0.352	0.00107344
CG43175	0.00354454	-0.343992	0.206	0.252	1
CecB	1.79418e-07	-0.346829	0.025	0.083	0.00186451
CG31219	5.04477e-12	-0.362733	0.051	0.149	5.24253e-08
lncRNA:CR43855	0.192489	-0.37716	0.592	0.577	1
lncRNA:CR40469	3.22906e-07	-0.385862	0.302	0.385	0.00335563
mthl4	1.9588e-07	-0.416076	0.083	0.154	0.00203558
PPO3	1.47832e-07	-0.420024	0.006	0.053	0.00153627
CG42394	7.82386e-08	-0.430387	0.571	0.629	0.000813055
CG3348	9.00168e-07	-0.465986	0.113	0.188	0.00935454
CecA1	9.37164e-07	-0.521159	0.04	0.096	0.00973901
Mmp1	1.01365e-05	-0.544993	0.246	0.315	0.105339
CG15784	1.27063e-05	-0.553074	0.11	0.174	0.132044
alphaTub85E	0.0276856	-0.568597	0.214	0.244	1
lncRNA:CR44316	3.19227e-07	-0.570027	0.07	0.137	0.00331741
Ance	0.00611661	-0.573083	0.541	0.553	1
IM18	5.44019e-09	-0.579725	0.021	0.085	5.65344e-05
CG33225	1.44615e-07	-0.585096	0.133	0.215	0.00150284
CecC	1.0224e-07	-0.588139	0.122	0.203	0.00106248
CG10467	0.0333077	-0.794795	0.079	0.105	1
CecA2	1.54157e-09	-0.854177	0.046	0.123	1.60199e-05
atilla	7.37528e-05	-0.892249	0.035	0.076	0.766439
CG15347	1.35171e-11	-0.947142	0.135	0.243	1.4047e-07
fok	0.102508	-0.974695	0.083	0.101	1
MtnA	0.00932779	-1.08016	0.252	0.291	1
betaTub60D	2.37165e-07	-1.08146	0.03	0.088	0.00246462
PPO1	0.00131834	-1.752	0.168	0.215	1
PPO2	0.25861	-1.98603	0.281	0.282	1

## Sheet: PM9
gene	cluster9.p_val	cluster9.avg_logFC	cluster9.pct.1	cluster9.pct.2	cluster9.p_val_adj
Abl	4.01616e-33	0.805368	0.637	0.456	4.1736e-29
Snoo	1.24657e-44	0.77038	0.648	0.402	1.29543e-40
EGFP	1.76592e-34	0.687791	0.566	0.345	1.83514e-30
Pen	2.14733e-67	0.61134	0.814	0.483	2.2315e-63
Ubx	2.77614e-83	0.590314	0.961	0.661	2.88497e-79
polo	1.20065e-45	0.561449	0.438	0.199	1.24772e-41
CycB	1.01651e-52	0.531776	0.408	0.161	1.05635e-48
udd	2.6091e-27	0.530624	0.51	0.312	2.71138e-23
Uhg7	2.67633e-27	0.516546	0.574	0.364	2.78124e-23
vkg	2.32644e-42	0.494786	0.951	0.742	2.41764e-38
Hsp70Aa	1.48674e-41	0.486252	0.279	0.096	1.54502e-37
Hsp70Ab	6.75502e-40	0.479455	0.281	0.099	7.01982e-36
Hsp68	7.73614e-41	0.477016	0.469	0.212	8.0394e-37
vsg	7.28579e-56	0.469001	0.971	0.9	7.57139e-52
Col4a1	6.7623e-49	0.460139	0.961	0.666	7.02738e-45
scra	6.76269e-34	0.459448	0.422	0.207	7.02778e-30
eEF1alpha1	1.29846e-52	0.430138	0.963	0.675	1.34936e-48
CG8501	1.39232e-45	0.425299	0.959	0.681	1.4469e-41
fabp	4.0839e-29	0.418481	0.514	0.278	4.24399e-25
Hsp27	3.32924e-18	0.416838	0.494	0.341	3.45975e-14
eEF1gamma	3.07444e-43	0.415466	0.934	0.62	3.19496e-39
Vap33	3.82553e-40	0.411114	0.838	0.517	3.97549e-36
luna	6.17459e-23	0.406359	0.684	0.507	6.41664e-19
Lon	2.57228e-24	0.405282	0.529	0.33	2.67312e-20
Hsp23	1.2087e-35	0.403784	0.656	0.368	1.25608e-31
stg	7.72015e-30	0.403543	0.637	0.393	8.02278e-26
Poc1	7.90583e-29	0.402099	0.275	0.119	8.21574e-25
Pxn	1.71916e-43	0.400805	0.963	0.792	1.78655e-39
Hsp70Bc	6.66363e-26	0.393501	0.436	0.228	6.92485e-22
eIF4H1	3.37831e-37	0.392784	0.809	0.507	3.51074e-33
Hsp26	4.4742e-40	0.392634	0.729	0.403	4.64958e-36
SPARC	3.69805e-38	0.390937	0.959	0.662	3.84302e-34
Had2	1.91243e-31	0.386345	0.734	0.472	1.98739e-27
fax	1.34195e-42	0.378689	0.672	0.354	1.39456e-38
Ten-m	1.69844e-31	0.3745	0.793	0.514	1.76501e-27
eEF5	4.89959e-36	0.37222	0.955	0.661	5.09165e-32
Klp61F	7.65652e-22	0.370575	0.256	0.121	7.95666e-18
Glt	4.52093e-37	0.366378	0.961	0.777	4.69815e-33
eEF2	1.9704e-36	0.363566	0.951	0.655	2.04764e-32
LanB2	4.99145e-37	0.360814	0.936	0.7	5.18712e-33
eIF4A	1.38201e-37	0.358777	0.941	0.646	1.43619e-33
CR43482	6.52141e-25	0.353895	0.205	0.078	6.77705e-21
CG4927	1.13128e-20	0.352288	0.473	0.287	1.17563e-16
HDAC1	1.44023e-24	0.352134	0.33	0.16	1.49669e-20
His3.3B	1.27821e-22	0.348687	0.818	0.719	1.32831e-18
l(1)G0289	7.74108e-30	0.348276	0.816	0.551	8.04453e-26
nrv3	4.39223e-24	0.344467	0.439	0.245	4.56441e-20
COX4	1.91662e-26	0.344316	0.691	0.432	1.99175e-22
ncd	1.9098e-21	0.340166	0.281	0.139	1.98466e-17
CG7194	2.38019e-22	0.337238	0.252	0.114	2.47349e-18
drpr	2.31412e-21	0.33665	0.498	0.302	2.40483e-17
Sap-r	3.28091e-28	0.336201	0.885	0.729	3.40952e-24
Hsp70Bbb	1.17253e-29	0.335017	0.193	0.064	1.2185e-25
eIF3a	4.62113e-30	0.334312	0.582	0.325	4.80227e-26
Traf-like	4.07238e-20	0.333766	0.455	0.267	4.23201e-16
CG3961	1.89945e-22	0.3336	0.508	0.288	1.9739e-18
Hsp70Bb	4.11125e-27	0.331582	0.229	0.087	4.27241e-23
eEF1beta	2.55598e-29	0.329811	0.818	0.513	2.65618e-25
Tig	1.13303e-23	0.328665	0.758	0.531	1.17744e-19
eIF3i	1.33274e-25	0.327222	0.572	0.341	1.38499e-21
Ppn	4.64674e-29	0.324786	0.965	0.899	4.82889e-25
tum	2.4113e-20	0.323789	0.299	0.155	2.50582e-16
LanA	3.93995e-31	0.323737	0.924	0.735	4.09439e-27
Idh3a	1.15785e-21	0.322776	0.49	0.292	1.20324e-17
Cp1	4.07048e-31	0.322239	0.967	0.889	4.23004e-27
feo	3.3645e-23	0.320811	0.279	0.131	3.49639e-19
lncRNA:CR42491	3.79001e-13	0.318876	0.484	0.355	3.93858e-09
eIF3j	3.12238e-19	0.317913	0.41	0.239	3.24478e-15
sip2	1.50093e-16	0.317614	0.221	0.11	1.55976e-12
Hsp70Ba	8.69512e-28	0.317602	0.189	0.064	9.03597e-24
eIF4E1	7.6727e-25	0.316018	0.559	0.323	7.97347e-21
eIF1A	4.4154e-26	0.313686	0.74	0.473	4.58848e-22
fat-spondin	1.68237e-29	0.313339	0.848	0.527	1.74832e-25
FASN1	7.24545e-16	0.311686	0.4	0.256	7.52947e-12
CCT5	3.64635e-23	0.309279	0.59	0.363	3.78928e-19
Rap1	3.94151e-31	0.307674	0.816	0.501	4.09602e-27
Klp67A	1.36803e-18	0.307091	0.193	0.085	1.42165e-14
TM4SF	7.53031e-18	0.303043	0.213	0.098	7.82549e-14
alc	2.03735e-17	0.301861	0.555	0.382	2.11721e-13
Madm	3.67542e-13	0.301497	0.332	0.208	3.8195e-09
eIF3b	1.74494e-20	0.30115	0.557	0.348	1.81334e-16
CCT3	4.01426e-21	0.300305	0.576	0.356	4.17162e-17
CCT1	1.46056e-22	0.299382	0.504	0.294	1.51782e-18
Ance-5	7.06274e-25	0.298053	0.826	0.563	7.3396e-21
Mpcp2	1.05106e-23	0.297692	0.713	0.457	1.09226e-19
msps	1.98642e-14	0.296044	0.301	0.178	2.06428e-10
jumu	9.66537e-13	0.294928	0.244	0.137	1.00443e-08
CG42232	1.09979e-12	0.294119	0.361	0.241	1.1429e-08
mei-38	2.53688e-21	0.293584	0.355	0.181	2.63632e-17
ND-PDSW	2.9644e-20	0.293119	0.41	0.23	3.0806e-16
sti	2.43571e-12	0.290267	0.182	0.095	2.53119e-08
Ama	6.43847e-18	0.289135	0.201	0.089	6.69086e-14
lectin-28C	2.77525e-24	0.28908	0.912	0.63	2.88404e-20
AsnRS	2.41808e-19	0.288469	0.344	0.185	2.51286e-15
Nepl21	8.17811e-20	0.288101	0.436	0.25	8.49869e-16
CG6650	1.43205e-13	0.286319	0.293	0.174	1.48819e-09
Mcm7	1.76801e-08	0.28495	0.229	0.147	0.000183731
galene	1.26236e-34	0.282897	0.146	0.037	1.31184e-30
Pdha	7.02928e-21	0.282556	0.381	0.204	7.30483e-17
Gs1	4.9106e-17	0.282241	0.279	0.144	5.1031e-13
ATPsynbeta	5.8816e-23	0.280444	0.76	0.482	6.11216e-19
CG17839	2.97226e-17	0.279728	0.32	0.174	3.08877e-13
Plp	1.51175e-13	0.279679	0.26	0.144	1.57101e-09
ATP6AP2	2.0365e-20	0.278294	0.492	0.287	2.11633e-16
lectin-24Db	2.16565e-17	0.277996	0.695	0.488	2.25054e-13
miple2	7.32414e-18	0.277768	0.195	0.086	7.61124e-14
mmy	5.28889e-16	0.277742	0.555	0.397	5.49621e-12
CCT7	1.0187e-20	0.277008	0.51	0.303	1.05863e-16
Slik	9.15181e-18	0.276148	0.396	0.226	9.51056e-14
eater	2.44968e-18	0.275259	0.809	0.614	2.5457e-14
ND-23	2.67323e-15	0.274604	0.26	0.137	2.77802e-11
LManII	1.78506e-17	0.27454	0.428	0.253	1.85503e-13
Ubi-p63E	4.11718e-13	0.273977	0.539	0.401	4.27857e-09
ScsbetaG	2.3822e-16	0.273252	0.246	0.125	2.47559e-12
PyK	1.17316e-14	0.272266	0.65	0.518	1.21915e-10
COX5A	2.08464e-18	0.270104	0.531	0.329	2.16635e-14
CG3328	7.87684e-14	0.269958	0.377	0.237	8.18561e-10
eIF3d1	1.69442e-17	0.269496	0.42	0.247	1.76084e-13
Hml	7.94904e-26	0.269342	0.965	0.904	8.26064e-22
Unr	1.34519e-18	0.268793	0.805	0.675	1.39792e-14
HINT1	7.01682e-19	0.266803	0.611	0.383	7.29188e-15
ATPsyngamma	2.25151e-15	0.266139	0.453	0.285	2.33977e-11
CG5888	1.11244e-11	0.265327	0.334	0.219	1.15604e-07
vir-1	1.51393e-22	0.264565	0.922	0.645	1.57327e-18
Fas1	1.55457e-28	0.26394	0.182	0.06	1.61551e-24
eIF3m	2.95652e-20	0.263799	0.518	0.312	3.07241e-16
AP-2mu	6.35697e-13	0.263676	0.463	0.325	6.60616e-09
lncRNA:CR45197	1.05192e-23	0.263573	0.262	0.11	1.09315e-19
CG44243	8.88733e-21	0.262911	0.254	0.115	9.23571e-17
Incenp	3.87169e-12	0.262591	0.258	0.153	4.02346e-08
pav	6.8955e-09	0.261336	0.182	0.107	7.1658e-05
cmet	6.56242e-12	0.260295	0.193	0.104	6.81967e-08
Sod1	5.60436e-20	0.259086	0.527	0.318	5.82405e-16
Cdc42	3.00272e-19	0.258305	0.824	0.691	3.12043e-15
ItgaPS5	5.87748e-13	0.258008	0.277	0.157	6.10787e-09
Stt3A	9.66537e-14	0.257903	0.541	0.398	1.00443e-09
Sr-CI	1.24884e-21	0.257698	0.936	0.752	1.29779e-17
Nepl19	6.72721e-17	0.257321	0.586	0.395	6.99092e-13
CG11882	1.72852e-12	0.256882	0.15	0.071	1.79628e-08
Sdc	4.00961e-17	0.25652	0.252	0.126	4.16678e-13
CG3618	1.77158e-13	0.25607	0.16	0.074	1.84103e-09
ScsbetaA	2.5491e-16	0.255786	0.412	0.245	2.64903e-12
ND-75	1.37883e-14	0.25446	0.293	0.163	1.43288e-10
COX6B	1.06195e-19	0.252562	0.682	0.425	1.10358e-15
Myo61F	2.62322e-14	0.251168	0.678	0.547	2.72605e-10
LanB1	4.8605e-22	0.248487	0.959	0.854	5.05103e-18
CG14207	2.93016e-07	0.248274	0.244	0.167	0.00304503
Fatp1	7.35602e-14	0.247879	0.145	0.063	7.64437e-10
lncRNA:CR34335	2.82125e-32	0.247682	1	0.971	2.93184e-28
LKRSDH	7.5136e-19	0.24746	0.379	0.208	7.80813e-15
CG31337	8.39355e-17	0.246952	0.869	0.752	8.72258e-13
agt	2.76298e-12	0.24643	0.355	0.218	2.87129e-08
LpR2	3.32475e-21	0.245734	0.783	0.545	3.45508e-17
ATPsynCF6	4.34469e-16	0.244893	0.604	0.394	4.515e-12
Fer2LCH	6.09193e-24	0.243851	0.924	0.806	6.33073e-20
Chrac-16	1.04733e-15	0.243776	0.232	0.114	1.08838e-11
Smr	1.60276e-12	0.243672	0.58	0.446	1.66558e-08
kar	1.45185e-15	0.243539	0.232	0.116	1.50876e-11
Ndae1	4.07167e-10	0.242523	0.42	0.299	4.23128e-06
Cks30A	9.48565e-11	0.242315	0.223	0.129	9.85749e-07
DnaJ-1	1.08704e-10	0.242025	0.525	0.401	1.12965e-06
Tis11	1.9226e-16	0.239914	0.799	0.65	1.99796e-12
svr	2.75947e-11	0.239714	0.572	0.448	2.86765e-07
Gp150	3.90653e-08	0.239496	0.145	0.08	0.000405966
Dref	1.38319e-07	0.23908	0.205	0.132	0.00143741
CG9372	3.91636e-16	0.239079	0.75	0.559	4.06989e-12
mtm	2.98555e-09	0.237351	0.271	0.177	3.10258e-05
GCS2alpha	1.77712e-13	0.237186	0.709	0.59	1.84678e-09
CG4829	2.16355e-18	0.236479	0.559	0.355	2.24836e-14
Nlg4	3.36353e-17	0.23568	0.236	0.11	3.49538e-13
CG12702	2.34436e-13	0.234293	0.166	0.079	2.43626e-09
spd-2	8.13193e-17	0.232141	0.135	0.052	8.4507e-13
Snx6	1.81636e-10	0.231929	0.529	0.409	1.88756e-06
CG1265	2.50006e-08	0.231185	0.275	0.189	0.000259807
CG10877	3.04347e-11	0.23108	0.311	0.193	3.16278e-07
cass	1.3108e-09	0.231005	0.225	0.133	1.36218e-05
Tgi	7.38843e-13	0.230727	0.348	0.215	7.67806e-09
Bap111	2.41065e-16	0.230511	0.221	0.106	2.50514e-12
Fkbp12	1.50426e-10	0.228379	0.566	0.419	1.56323e-06
nesd	1.87726e-09	0.228061	0.182	0.104	1.95085e-05
mars	3.59648e-09	0.227188	0.146	0.078	3.73747e-05
CG15083	1.24044e-09	0.22705	0.252	0.156	1.28907e-05
Stip1	1.31041e-12	0.226135	0.326	0.197	1.36178e-08
COX7C	1.85362e-17	0.224449	0.762	0.488	1.92628e-13
Orct	5.08193e-13	0.224163	0.248	0.136	5.28115e-09
br	7.5551e-09	0.223761	0.412	0.306	7.85126e-05
COX5B	2.06038e-14	0.223408	0.549	0.357	2.14114e-10
CG34232	3.44646e-11	0.223334	0.412	0.267	3.58156e-07
Uggt	8.5161e-14	0.222913	0.303	0.171	8.84993e-10
eRF3	2.12198e-14	0.222561	0.395	0.241	2.20516e-10
eIF4G2	2.31822e-08	0.222559	0.316	0.22	0.00024091
cv-d	9.44525e-15	0.222553	0.635	0.46	9.8155e-11
eIF2alpha	7.55422e-15	0.222417	0.475	0.302	7.85035e-11
CG31549	5.79802e-13	0.222349	0.24	0.13	6.02531e-09
regucalcin	1.55036e-16	0.220456	0.967	0.964	1.61114e-12
ND-ACP	5.50741e-13	0.220417	0.43	0.271	5.7233e-09
GlyRS	1.26024e-13	0.220032	0.326	0.19	1.30964e-09
Tlk	1.01644e-10	0.21967	0.277	0.167	1.05628e-06
CG7878	4.16952e-07	0.219087	0.186	0.116	0.00433297
asRNA:CR46104	4.24871e-18	0.217699	0.275	0.132	4.41526e-14
ERp60	3.9552e-17	0.217291	0.979	0.949	4.11025e-13
Sesn	1.13837e-06	0.217192	0.348	0.259	0.01183
Npc1a	8.3082e-09	0.216011	0.275	0.181	8.63388e-05
CCT6	5.76724e-14	0.215407	0.418	0.262	5.99332e-10
ab	4.50861e-40	0.214785	0.072	0.01	4.68535e-36
Acer	3.90818e-13	0.214755	0.248	0.134	4.06138e-09
CG14814	2.95186e-14	0.21259	0.102	0.037	3.06758e-10
dre4	4.50548e-10	0.211498	0.248	0.151	4.6821e-06
CG34331	3.87209e-15	0.211017	0.867	0.714	4.02387e-11
CG6236	3.55304e-10	0.210805	0.479	0.353	3.69232e-06
Sps1	2.04057e-10	0.210432	0.252	0.151	2.12056e-06
Nup358	6.57233e-08	0.210338	0.332	0.237	0.000682997
CG18549	3.93806e-09	0.210294	0.201	0.117	4.09243e-05
RanBP3	2.85574e-10	0.209244	0.279	0.175	2.96768e-06
Capr	2.36392e-05	0.209	0.441	0.385	0.245658
CG32638	1.50535e-09	0.20859	0.342	0.23	1.56436e-05
Prosap	1.54158e-10	0.207983	0.73	0.59	1.60201e-06
lig	8.96419e-07	0.207805	0.453	0.373	0.00931558
Fum1	9.27291e-10	0.207672	0.305	0.196	9.6364e-06
N	4.81302e-08	0.207236	0.484	0.38	0.000500169
Gyc76C	1.02949e-17	0.206957	0.227	0.101	1.06984e-13
Caf1-55	3.78382e-11	0.206783	0.307	0.188	3.93214e-07
eIF4G1	8.306e-14	0.206264	0.605	0.4	8.6316e-10
CG10803	4.8204e-09	0.206033	0.195	0.115	5.00936e-05
Gss1	1.65555e-12	0.205069	0.209	0.106	1.72045e-08
Gss2	1.65555e-12	0.205069	0.209	0.106	1.72045e-08
CG5273	3.28823e-11	0.2039	0.172	0.087	3.41713e-07
Pkc98E	3.35523e-07	0.203338	0.221	0.145	0.00348675
eIF2Bbeta	6.03792e-12	0.203196	0.174	0.087	6.27461e-08
Idh	2.80919e-07	0.202836	0.576	0.479	0.00291931
Fer1HCH	8.64996e-14	0.202564	0.771	0.636	8.98904e-10
flfl	4.84008e-05	0.202526	0.193	0.137	0.502981
endos	8.84264e-07	0.201995	0.303	0.223	0.00918927
Tsp42Ee	9.43266e-16	0.201666	0.834	0.632	9.80242e-12
Mtpbeta	1.83639e-11	0.201061	0.369	0.234	1.90838e-07
Prestin	1.75369e-11	0.200832	0.193	0.101	1.82244e-07
Xpc	2.08073e-11	0.200739	0.158	0.078	2.1623e-07
CG46314	7.12644e-16	0.200378	0.23	0.109	7.4058e-12
CG7272	7.06741e-06	0.200168	0.186	0.124	0.0734445
CG12643	5.93732e-05	0.199743	0.242	0.179	0.617006
hpRNA:CR46342	6.28718e-12	0.199205	0.158	0.075	6.53363e-08
Hsp83	5.57793e-13	0.198938	0.955	0.886	5.79658e-09
CG15695	3.21652e-08	0.198709	0.492	0.39	0.000334261
Cat	5.10878e-09	0.197975	0.355	0.249	5.30905e-05
lncRNA:Hsromega	1.69722e-09	0.197608	0.518	0.362	1.76375e-05
O-fut1	1.26865e-08	0.197327	0.354	0.251	0.000131838
aurB	2.77937e-05	0.197114	0.219	0.159	0.288833
ben	9.83478e-11	0.197098	0.652	0.524	1.02203e-06
Gal	9.77065e-11	0.197087	0.266	0.157	1.01537e-06
CG42837	5.49735e-16	0.196936	0.168	0.07	5.71285e-12
asRNA:CR45350	4.55138e-13	0.19679	0.236	0.124	4.72979e-09
TORIP	4.44174e-10	0.196729	0.197	0.11	4.61585e-06
ND-B17	2.45054e-11	0.196375	0.35	0.22	2.5466e-07
Naa15-16	8.43249e-11	0.196117	0.252	0.148	8.76304e-07
mt:lrRNA	1.17628e-15	0.195888	1	1	1.2224e-11
Hsp60A	4.80508e-14	0.195853	0.553	0.355	4.99344e-10
Syp	1.00524e-14	0.19553	0.871	0.767	1.04464e-10
Oatp74D	0.000489629	0.195426	0.207	0.156	1
Not1	1.65226e-08	0.195144	0.633	0.54	0.000171703
Pi3K68D	1.55523e-06	0.195117	0.191	0.125	0.016162
Pp2A-29B	4.36684e-08	0.194944	0.545	0.455	0.000453802
Atpalpha	4.65884e-11	0.194068	0.729	0.608	4.84147e-07
SREBP	1.03098e-11	0.194054	0.383	0.244	1.0714e-07
borr	1.56377e-07	0.193216	0.219	0.142	0.00162507
Plod	8.26858e-12	0.192429	0.736	0.59	8.59271e-08
CG8478	4.92986e-09	0.191569	0.111	0.054	5.12311e-05
Myc	6.89184e-13	0.191546	0.504	0.333	7.162e-09
SERCA	1.56529e-12	0.191099	0.402	0.253	1.62665e-08
MED31	7.25384e-06	0.190987	0.129	0.078	0.0753819
fzy	5.06272e-07	0.190939	0.176	0.109	0.00526118
SLIRP1	5.66638e-19	0.190888	0.18	0.071	5.8885e-15
Zasp52	1.87616e-08	0.190722	0.311	0.206	0.000194971
eff	6.2124e-13	0.190579	0.936	0.881	6.45593e-09
Lsd-1	2.17281e-12	0.190416	0.119	0.05	2.25798e-08
CG5397	6.69127e-14	0.189352	0.775	0.564	6.95357e-10
CG3558	4.96029e-08	0.188866	0.441	0.336	0.000515473
CG42711	1.32985e-11	0.188731	0.635	0.46	1.38198e-07
Src42A	0.00051673	0.18831	0.289	0.238	1
DCP2	1.7045e-07	0.187534	0.295	0.205	0.00177131
CG9425	2.47535e-07	0.18655	0.295	0.205	0.00257239
CG16953	9.06782e-09	0.186483	0.238	0.149	9.42328e-05
Klp3A	1.45208e-06	0.186376	0.133	0.078	0.01509
Rab10	3.46072e-08	0.186215	0.385	0.278	0.000359638
Smyd4-4	2.63411e-08	0.185878	0.184	0.109	0.000273736
Ppa	4.35737e-06	0.184709	0.139	0.084	0.0452818
CG2694	2.184e-14	0.184642	0.104	0.038	2.26961e-10
CG17278	0.000358391	0.18456	0.068	0.124	1
ATPsynG	3.06732e-13	0.184469	0.701	0.473	3.18756e-09
SNRPG	4.13432e-10	0.184341	0.42	0.281	4.29639e-06
VhaAC45	1.32405e-08	0.184113	0.66	0.56	0.000137595
eIF3c	1.18009e-12	0.183088	0.443	0.283	1.22635e-08
Cap-G	9.50643e-09	0.182273	0.154	0.084	9.87908e-05
Rme-8	4.71027e-08	0.181752	0.234	0.15	0.000489492
NSD	7.26019e-11	0.181678	0.119	0.053	7.54479e-07
asRNA:CR43916	1.04259e-12	0.181546	0.129	0.055	1.08346e-08
CG2218	0.000174734	0.181367	0.166	0.117	1
Lsd-2	0.00179742	0.181036	0.344	0.293	1
Cenp-C	1.75694e-06	0.180888	0.133	0.077	0.0182581
CG1640	7.91858e-06	0.180772	0.355	0.279	0.0822899
Pdi	1.39586e-14	0.180736	0.98	0.951	1.45057e-10
Nup35	0.000255838	0.180307	0.189	0.141	1
Bap60	4.637e-06	0.180149	0.238	0.169	0.0481877
CG7627	6.34955e-07	0.179596	0.254	0.171	0.00659845
Phm	2.44923e-07	0.179228	0.469	0.372	0.00254524
Snx17	1.20141e-07	0.179087	0.188	0.112	0.0012485
rod	3.91391e-08	0.179066	0.109	0.054	0.000406734
Meltrin	2.74406e-14	0.179002	0.738	0.535	2.85163e-10
ush	0.000226672	0.178961	0.275	0.214	1
ND-30	7.53745e-09	0.178884	0.301	0.195	7.83292e-05
CG3402	3.13996e-07	0.178814	0.176	0.107	0.00326305
Amun	6.32164e-07	0.178746	0.414	0.319	0.00656945
mkg-p	1.37978e-09	0.17851	0.244	0.144	1.43387e-05
HUWE1	1.17987e-06	0.178297	0.289	0.207	0.0122612
ATPsynO	3.41255e-08	0.178005	0.404	0.28	0.000354633
Chchd3	3.08731e-09	0.177778	0.209	0.121	3.20833e-05
stai	1.46976e-06	0.177638	0.121	0.068	0.0152738
CDase	6.54388e-08	0.177553	0.168	0.097	0.00068004
pds5	0.00063446	0.177361	0.203	0.153	1
ATPsynD	1.30448e-09	0.177348	0.463	0.317	1.35562e-05
grp	0.000214072	0.176788	0.17	0.122	1
Ugt317A1	2.44443e-10	0.17673	0.312	0.194	2.54025e-06
Tnpo	4.40917e-06	0.176404	0.236	0.163	0.0458201
Rbf	4.0201e-06	0.176384	0.312	0.231	0.0417769
Klp10A	5.68345e-05	0.176179	0.254	0.195	0.590624
E(spl)m3-HLH	1.37451e-08	0.175985	0.078	0.032	0.000142839
Mtpalpha	4.89098e-05	0.175813	0.352	0.285	0.508271
Cds	5.51341e-09	0.175748	0.195	0.112	5.72953e-05
CG42637	9.05691e-15	0.175545	0.188	0.084	9.41194e-11
mud	8.71532e-07	0.175491	0.189	0.12	0.00905696
Pat1	8.17351e-07	0.174793	0.318	0.23	0.00849391
Hsp22	1.22828e-12	0.174558	0.111	0.044	1.27643e-08
CoRest	0.000792397	0.174335	0.213	0.165	1
CG1440	2.69391e-05	0.174014	0.383	0.311	0.279951
Inos	8.92644e-13	0.173523	0.848	0.669	9.27635e-09
msi	9.72021e-05	0.173501	0.447	0.382	1
rig	0.000164823	0.173331	0.111	0.071	1
lncRNA:CR45660	6.71274e-08	0.173119	0.217	0.134	0.000697588
CG42322	7.54081e-14	0.172995	0.293	0.156	7.83641e-10
Ald1	2.08901e-21	0.17274	0.68	0.431	2.1709e-17
Fkbp39	7.44759e-07	0.172616	0.395	0.285	0.00773954
CG12065	1.46465e-06	0.17132	0.709	0.626	0.0152206
tws	3.78267e-05	0.171142	0.295	0.228	0.393095
dpa	6.22029e-05	0.170772	0.182	0.126	0.646412
wrd	4.88653e-09	0.170127	0.223	0.131	5.07809e-05
CG12535	1.03372e-07	0.170078	0.203	0.124	0.00107424
ND-42	4.59092e-08	0.170033	0.242	0.152	0.000477088
Cyp28a5	1.3907e-07	0.170009	0.219	0.138	0.00144522
twin	0.000514419	0.169941	0.182	0.135	1
sn	1.64165e-08	0.16943	0.18	0.102	0.0001706
Mink	0.00326709	0.169292	0.164	0.126	1
CG4822	4.18546e-11	0.169283	0.156	0.077	4.34953e-07
Culd	2.16605e-09	0.169266	0.076	0.03	2.25096e-05
CG9302	5.03527e-05	0.169092	0.406	0.337	0.523265
CG31673	7.15309e-09	0.169035	0.398	0.282	7.43349e-05
CG33057	5.92374e-12	0.168822	0.221	0.114	6.15595e-08
CG10859	1.15334e-07	0.168725	0.217	0.135	0.00119855
CycA	7.24009e-06	0.16848	0.217	0.15	0.075239
CtsB1	6.33491e-08	0.168092	0.773	0.7	0.000658324
tank	3.49069e-07	0.168052	0.145	0.083	0.00362753
mt:ND5	9.55614e-06	0.167425	0.889	0.867	0.0993074
SelG	1.53184e-07	0.167051	0.578	0.475	0.00159188
RnrL	1.46949e-06	0.166741	0.248	0.17	0.0152709
CG13917	1.33631e-08	0.166612	0.178	0.101	0.000138869
CG5235	1.95982e-09	0.166589	0.074	0.029	2.03665e-05
Dpck	0.000196269	0.166339	0.113	0.072	1
gzl	1.64686e-06	0.166206	0.189	0.12	0.0171142
RhoGAP54D	9.74943e-09	0.165994	0.098	0.045	0.000101316
RpA-70	2.72288e-05	0.165185	0.305	0.234	0.282961
Pfas	2.58939e-09	0.165136	0.102	0.045	2.69089e-05
Ref1	0.00158831	0.164899	0.414	0.373	1
Cyp6u1	8.9206e-07	0.164679	0.123	0.069	0.00927029
Ets21C	0.000154896	0.164588	0.49	0.426	1
Ir40a	0.000217282	0.164381	0.135	0.088	1
x16	2.86371e-05	0.163965	0.357	0.287	0.297597
psq	0.00614072	0.163628	0.33	0.292	1
CG6028	0.00479497	0.163541	0.297	0.256	1
Trxr-1	6.32276e-07	0.163165	0.52	0.435	0.00657061
CG9705	1.81812e-06	0.162948	0.627	0.552	0.0188939
Cirl	1.90004e-05	0.162818	0.176	0.118	0.197453
bun	1.21525e-08	0.161969	0.814	0.69	0.000126288
CG44194	2.67882e-18	0.1619	0.119	0.04	2.78383e-14
asp	3.63335e-12	0.161457	0.105	0.042	3.77578e-08
AP-2alpha	2.25602e-05	0.161054	0.365	0.296	0.234445
FucTB	1.03237e-07	0.160892	0.244	0.159	0.00107284
Jheh2	3.59158e-06	0.160647	0.424	0.333	0.0373237
C1GalTA	0.000411354	0.160495	0.309	0.252	1
ATPsynB	6.4933e-08	0.160429	0.426	0.298	0.000674784
CG1103	1.12497e-06	0.16039	0.305	0.219	0.0116907
PCNA	0.00193099	0.160249	0.328	0.273	1
Sec31	0.000117164	0.160068	0.279	0.217	1
CG9804	2.65168e-07	0.159897	0.166	0.1	0.00275563
Mms19	6.32001e-05	0.159849	0.168	0.115	0.656775
lola	3.29714e-06	0.159519	0.637	0.555	0.0342639
CG9331	5.6261e-06	0.159248	0.582	0.513	0.0584664
hook	6.742e-08	0.158683	0.1	0.048	0.000700629
fend	1.71802e-05	0.158459	0.197	0.135	0.178537
CG1317	6.10313e-05	0.158303	0.148	0.097	0.634238
Cse1	4.24868e-08	0.1579	0.215	0.13	0.000441523
MFS17	0.0135475	0.157747	0.195	0.164	1
CG14695	6.13128e-06	0.157731	0.186	0.122	0.0637162
UGP	3.90412e-07	0.15771	0.322	0.227	0.00405716
HnRNP-K	1.57131e-08	0.157669	0.188	0.107	0.000163291
Stt3B	2.29965e-09	0.157588	0.467	0.319	2.3898e-05
CG4502	1.59838e-06	0.157078	0.164	0.101	0.0166103
pzg	6.43374e-06	0.157066	0.258	0.186	0.0668595
Mcm2	6.83266e-07	0.156845	0.133	0.075	0.0071005
CG42369	1.25414e-07	0.15683	0.412	0.292	0.0013033
scu	5.94386e-06	0.156676	0.66	0.593	0.0617686
Taldo	9.17961e-09	0.156655	0.309	0.199	9.53945e-05
l(2)k05819	1.33157e-05	0.156416	0.152	0.097	0.138376
Calr	4.73596e-14	0.156129	0.887	0.601	4.92161e-10
mtgo	3.41006e-06	0.155824	0.525	0.425	0.0354373
CG46319	1.14755e-13	0.155728	0.146	0.062	1.19254e-09
CG30344	0.000101698	0.155633	0.371	0.299	1
Gk1	1.71252e-09	0.155338	0.154	0.08	1.77966e-05
trol	1.32182e-08	0.155175	0.553	0.434	0.000137363
vnc	5.26254e-14	0.15515	0.148	0.062	5.46883e-10
CG9536	0.000847548	0.154824	0.164	0.12	1
sky	3.56379e-08	0.154777	0.191	0.112	0.000370349
NimB3	8.71071e-06	0.154018	0.25	0.173	0.0905217
crol	1.32815e-05	0.153646	0.459	0.385	0.138021
Karybeta3	3.1696e-06	0.153639	0.488	0.398	0.0329385
Nup205	0.00450089	0.153137	0.129	0.095	1
Echs1	3.92306e-06	0.152613	0.688	0.624	0.0407685
Cka	7.72179e-05	0.152367	0.205	0.147	0.802449
CG4968	0.0112053	0.152267	0.215	0.182	1
Surf4	1.86884e-05	0.152249	0.574	0.515	0.194209
CG7504	1.01562e-07	0.152128	0.139	0.075	0.00105544
E(Pc)	0.00689835	0.151989	0.195	0.158	1
CG8080	0.00220534	0.151876	0.246	0.201	1
asRNA:CR45044	1.08831e-12	0.151783	0.094	0.034	1.13097e-08
Mmp2	2.31226e-07	0.15178	0.154	0.088	0.0024029
eIF4B	7.16023e-08	0.151713	0.363	0.251	0.000744092
CG18446	1.4382e-06	0.151643	0.146	0.085	0.0149458
Syx7	0.000133142	0.1516	0.189	0.135	1
ATPsyndelta	5.30324e-08	0.151448	0.4	0.281	0.000551113
Scsalpha1	3.34803e-05	0.151384	0.307	0.229	0.347928
Chc	4.08768e-09	0.151372	0.662	0.536	4.24791e-05
CysRS	1.68134e-07	0.150836	0.141	0.077	0.00174725
CG4456	4.32275e-11	0.150774	0.098	0.039	4.4922e-07
kek1	0.000222353	0.150285	0.229	0.17	1
Spc105R	8.31297e-05	0.150225	0.08	0.045	0.863883
sqd	2.00943e-12	0.150194	0.988	0.956	2.0882e-08
Myb	6.39442e-06	0.150019	0.295	0.219	0.0664508
CG6767	0.000101167	-0.150274	0.197	0.285	1
zetaCOP	0.00154629	-0.150822	0.291	0.364	1
meigo	0.000291631	-0.151014	0.119	0.185	1
CG9662	1.96847e-06	-0.151451	0.098	0.187	0.0204564
Tim10	0.00149257	-0.1521	0.168	0.228	1
stv	2.45068e-09	-0.153118	0.008	0.08	2.54675e-05
Rpb12	0.000241008	-0.153377	0.264	0.352	1
CG30120	2.22364e-05	-0.15398	0.074	0.141	0.23108
SelR	4.82951e-05	-0.154333	0.082	0.149	0.501883
Nop60B	0.00148764	-0.154435	0.369	0.438	1
Ufc1	4.96039e-06	-0.154526	0.102	0.185	0.0515484
vtd	2.25557e-06	-0.15462	0.092	0.177	0.0234398
Rab6	8.6453e-05	-0.155691	0.26	0.352	0.89842
Prx3	3.16585e-05	-0.156048	0.188	0.281	0.328995
Rbp1	0.00116461	-0.156187	0.42	0.488	1
wun2	1.20716e-06	-0.156785	0.006	0.055	0.0125448
CG34317	3.66357e-06	-0.157037	0.049	0.115	0.0380718
Pmm2	6.25762e-06	-0.157288	0.129	0.22	0.0650292
CG34132	1.23288e-05	-0.157492	0.188	0.286	0.128121
Syx1A	0.00532391	-0.157765	0.367	0.428	1
mRpS21	2.33264e-06	-0.157807	0.152	0.255	0.0242408
Nedd4	7.66752e-05	-0.157899	0.154	0.235	0.796809
Reg-5	0.000541736	-0.158056	0.109	0.169	1
CG3792	1.58259e-05	-0.158245	0.146	0.236	0.164462
yuri	3.75351e-07	-0.158761	0.031	0.099	0.00390064
CG10527	0.00885133	-0.158819	0.502	0.525	1
ND-MWFE	0.000312097	-0.159231	0.309	0.397	1
CG2199	5.23672e-05	-0.159685	0.086	0.152	0.5442
CG14483	6.86082e-05	-0.159826	0.184	0.272	0.712977
RpL37A	1.18048e-14	-0.160635	0.998	0.991	1.22676e-10
tacc	0.000293209	-0.161135	0.229	0.307	1
Galt	0.000230121	-0.161321	0.191	0.271	1
CG11137	3.45939e-05	-0.161485	0.17	0.258	0.3595
RpL40	1.6224e-11	-0.161492	0.988	0.972	1.686e-07
CG8545	1.18183e-05	-0.16169	0.127	0.212	0.122816
CG42542	3.49609e-05	-0.161734	0.164	0.248	0.363314
uex	0.00157739	-0.162088	0.342	0.415	1
Uhg3	3.07979e-08	-0.16218	0.041	0.124	0.000320052
RASSF8	3.76907e-07	-0.162611	0.078	0.167	0.00391681
alph	0.000740833	-0.16337	0.289	0.364	1
CG17841	0.0145205	-0.163637	0.156	0.2	1
CG44008	4.78508e-09	-0.163808	0.006	0.074	4.97265e-05
Lis-1	4.8598e-05	-0.16391	0.172	0.256	0.505031
corto	0.000242443	-0.164268	0.16	0.232	1
Dhap-at	3.50167e-09	-0.165394	0.018	0.095	3.63894e-05
CaMKII	7.65335e-06	-0.165836	0.141	0.233	0.0795336
Pglym78	0.000101528	-0.166377	0.107	0.177	1
TBCB	1.54809e-05	-0.166526	0.162	0.252	0.160878
RpLP0-like	0.000151746	-0.167609	0.209	0.29	1
SmD1	9.41064e-05	-0.167648	0.205	0.293	0.977953
CG8891	1.53567e-05	-0.167791	0.197	0.296	0.159586
Nc73EF	2.39317e-05	-0.167991	0.141	0.224	0.248698
lace	0.00023106	-0.168199	0.225	0.307	1
CG7630	1.70028e-06	-0.168246	0.719	0.721	0.0176693
spir	8.25852e-05	-0.168388	0.045	0.097	0.858226
AIMP1	2.48558e-06	-0.168482	0.117	0.209	0.0258301
CG7637	3.81557e-05	-0.168678	0.217	0.316	0.396514
olf186-F	8.19248e-06	-0.168769	0.113	0.197	0.0851362
Sec61gamma	5.17506e-05	-0.168866	0.418	0.51	0.537792
Galphai	0.000179519	-0.168906	0.264	0.349	1
CG16710	5.39115e-07	-0.168966	0.006	0.058	0.00560248
CG42668	1.87698e-05	-0.169708	0.174	0.266	0.195056
Rpn13	3.64633e-05	-0.169971	0.205	0.299	0.378927
CG8026	2.20901e-08	-0.169971	0.021	0.094	0.000229561
Myo31DF	0.00170144	-0.17004	0.273	0.343	1
CG3408	4.27992e-06	-0.170091	0.098	0.18	0.044477
Arpc4	0.000128577	-0.170091	0.236	0.325	1
CG6567	2.35543e-07	-0.170535	0.068	0.154	0.00244776
kraken	1.02235e-06	-0.170689	0.072	0.153	0.0106242
l(2)k09848	7.08948e-08	-0.170988	0.033	0.108	0.000736739
mRpL55	3.84246e-06	-0.171717	0.135	0.228	0.0399308
CG5323	6.90856e-07	-0.172439	0.078	0.162	0.00717937
CHOp24	0.000252336	-0.172716	0.551	0.608	1
CG10103	6.46484e-06	-0.173252	0.143	0.234	0.0671826
CG1703	5.30131e-05	-0.17352	0.254	0.346	0.550912
Paip2	9.37504e-06	-0.173554	0.139	0.228	0.0974254
CG33995	1.32697e-05	-0.173752	0.078	0.148	0.137899
mt:CoI	7.82019e-13	-0.174049	0.984	0.983	8.12674e-09
ND-18	1.57642e-05	-0.17424	0.203	0.302	0.163822
RpL13A	7.41406e-11	-0.174397	0.996	0.988	7.70469e-07
vig	0.000304524	-0.174684	0.441	0.51	1
CG6937	2.98403e-07	-0.174822	0.088	0.179	0.003101
Gdap2	1.23688e-06	-0.174828	0.062	0.14	0.0128537
CG5535	9.25059e-09	-0.175037	0.025	0.104	9.61321e-05
CG17544	0.000129924	-0.175087	0.23	0.316	1
wun	5.91086e-09	-0.175674	0.029	0.112	6.14257e-05
RpL26	7.9743e-15	-0.17599	1	0.988	8.28689e-11
CG42846	6.34445e-07	-0.176209	0.045	0.118	0.00659316
Prosbeta4	0.000110733	-0.176305	0.473	0.551	1
shn	5.08934e-07	-0.176626	0.086	0.175	0.00528884
ZnT63C	0.000212349	-0.177151	0.186	0.262	1
CG43179	2.23973e-08	-0.178142	0.002	0.061	0.000232753
ND-13A	1.18044e-05	-0.178784	0.232	0.337	0.122671
RpL29	3.91784e-12	-0.179191	0.959	0.952	4.07141e-08
SCaMC	0.00155164	-0.179716	0.412	0.475	1
CG43125	0.00169976	-0.181019	0.232	0.294	1
SmD2	0.000115506	-0.181322	0.354	0.442	1
Glut4EF	0.0156711	-0.181527	0.17	0.213	1
Dhpr	3.17402e-07	-0.182035	0.094	0.186	0.00329844
CRIF	4.36826e-07	-0.182189	0.086	0.174	0.00453949
Tim9a	5.43608e-07	-0.18296	0.094	0.184	0.00564917
CG18659	4.5925e-07	-0.18333	0.09	0.181	0.00477252
Rpt6	0.000337493	-0.183386	0.275	0.358	1
Tgt	1.77805e-08	-0.184008	0.037	0.118	0.000184775
Ars2	1.95733e-06	-0.184039	0.182	0.288	0.0203406
baf	0.000700419	-0.184465	0.43	0.495	1
ND-B17.2	3.56303e-05	-0.184929	0.211	0.302	0.37027
RpS21	3.99377e-13	-0.185195	0.99	0.958	4.15032e-09
RpL31	1.26386e-13	-0.185546	0.979	0.963	1.3134e-09
CG31174	1.79163e-07	-0.186621	0.004	0.058	0.00186187
Pfdn5	0.000128433	-0.187911	0.279	0.367	1
Spase25	0.000172031	-0.188076	0.461	0.534	1
CG2003	2.08741e-06	-0.188687	0.129	0.222	0.0216923
mys	0.0465827	-0.188844	0.445	0.476	1
Cdc37	2.99039e-07	-0.188925	0.207	0.328	0.00310761
lncRNA:CR43900	4.00677e-09	-0.189205	0.016	0.091	4.16384e-05
HmgZ	0.00385854	-0.189942	0.771	0.736	1
spin	0.000112078	-0.190346	0.285	0.369	1
CG5004	6.9085e-07	-0.190489	0.109	0.204	0.00717932
mRpL14	1.72174e-07	-0.19054	0.076	0.166	0.00178923
RpL34a	1.03569e-05	-0.190665	0.75	0.748	0.107629
CG13117	0.0586015	-0.191442	0.617	0.624	1
Spn42Da	6.54797e-07	-0.191485	0.082	0.167	0.00680465
hoip	8.13547e-06	-0.192745	0.299	0.396	0.0845438
RFeSP	0.000341043	-0.193046	0.406	0.468	1
Set	7.72208e-06	-0.193089	0.217	0.32	0.0802479
CG17454	1.50573e-07	-0.194118	0.088	0.181	0.00156475
ghi	9.32709e-05	-0.194124	0.234	0.318	0.969271
Rpn10	3.67999e-06	-0.194347	0.227	0.332	0.0382424
Mo25	4.8097e-05	-0.194509	0.207	0.295	0.499824
Rpn5	1.65276e-06	-0.196144	0.244	0.363	0.0171754
Syb	0.000289966	-0.196429	0.719	0.709	1
bif	0.000949384	-0.196809	0.412	0.47	1
RpS20	6.59129e-12	-0.196887	0.994	0.985	6.84966e-08
Myd88	2.69036e-07	-0.196917	0.107	0.205	0.00279583
CG13551	3.40634e-05	-0.197575	0.67	0.684	0.353986
Su(dx)	1.60739e-06	-0.198586	0.109	0.198	0.016704
Trp1	2.50447e-05	-0.199034	0.258	0.354	0.260265
Roc1a	1.84597e-05	-0.199403	0.316	0.412	0.191833
Rpb11	3.14076e-08	-0.199533	0.098	0.201	0.000326388
Nop56	0.000296943	-0.199807	0.328	0.404	1
CG2444	1.39821e-05	-0.200126	0.074	0.144	0.145302
spict	2.69672e-06	-0.200727	0.143	0.235	0.0280243
pst	7.05526e-06	-0.203587	0.232	0.336	0.0733183
Sodh-2	0.00121323	-0.20369	0.234	0.296	1
CG10055	1.20748e-05	-0.205592	0.109	0.187	0.125481
CG31715	8.94383e-07	-0.205728	0.162	0.268	0.00929443
CG7860	0.451819	-0.206169	0.066	0.059	1
Nrg	4.32843e-05	-0.206693	0.541	0.606	0.449811
CG33462	2.83136e-10	-0.206754	0.004	0.08	2.94234e-06
28SrRNA-Psi:CR45848	0.0405831	-0.206955	0.186	0.144	1
l(2)gl	4.82121e-06	-0.20758	0.199	0.297	0.050102
RpL21	1.47378e-15	-0.207804	0.992	0.987	1.53155e-11
ND-B12	9.35488e-07	-0.207897	0.303	0.42	0.00972159
mago	4.95685e-08	-0.208651	0.172	0.289	0.000515116
ND-B14.7	2.98157e-07	-0.209224	0.158	0.268	0.00309845
Prosbeta1	1.37116e-05	-0.209812	0.359	0.448	0.14249
Pvf2	5.74412e-07	-0.212094	0.031	0.097	0.00596929
CCT4	1.09838e-05	-0.213256	0.471	0.547	0.114144
Nmdmc	2.05192e-07	-0.213643	0.107	0.204	0.00213236
Su(var)205	0.00158757	-0.213887	0.424	0.466	1
Dyak-FK506-bp2	2.08324e-05	-0.213958	0.297	0.392	0.216491
asRNA:CR46093	9.96665e-07	-0.213982	0.006	0.056	0.0103573
Chchd2	0.000194559	-0.214552	0.553	0.591	1
Gip	0.0741096	-0.21532	0.166	0.201	1
CG17271	3.22366e-06	-0.215571	0.146	0.238	0.0335002
Jafrac1	3.83194e-06	-0.215595	0.674	0.717	0.0398215
Arpc3B	2.10779e-05	-0.215722	0.314	0.402	0.219041
chn	1.64994e-06	-0.215742	0.072	0.148	0.0171462
Rtnl1	2.5666e-07	-0.216003	0.609	0.677	0.00266721
Swip-1	0.000914795	-0.216301	0.449	0.497	1
CG10376	1.69405e-07	-0.216504	0.107	0.203	0.00176046
Diap1	4.21254e-07	-0.216921	0.186	0.296	0.00437767
nop5	1.90687e-05	-0.217094	0.271	0.366	0.198162
ND-B15	6.1486e-08	-0.218315	0.189	0.311	0.000638962
Vrp1	6.09944e-07	-0.219475	0.07	0.152	0.00633854
RhoL	5.02704e-05	-0.219962	0.244	0.329	0.52241
CNBP	0.000124367	-0.220127	0.936	0.904	1
RpS4	1.82139e-14	-0.22016	0.986	0.971	1.89279e-10
Fit1	2.50422e-05	-0.220257	0.17	0.256	0.260239
crc	2.27984e-05	-0.222886	0.457	0.517	0.236921
Tim17b	3.38581e-07	-0.222944	0.486	0.579	0.00351854
28SrRNA:CR45837	7.36862e-06	-0.223158	0.299	0.192	0.0765747
ND-MNLL	2.44348e-05	-0.223161	0.217	0.299	0.253926
gem	7.41853e-05	-0.223218	0.174	0.248	0.770933
Mob2	1.26599e-05	-0.223535	0.193	0.282	0.131561
Manf	0.000608149	-0.223679	0.494	0.533	1
RpII18	3.01578e-07	-0.223701	0.232	0.351	0.003134
sun	1.5831e-07	-0.223908	0.609	0.66	0.00164516
Prosalpha5	2.71669e-05	-0.224521	0.447	0.52	0.282319
Pomp	9.7284e-07	-0.224659	0.402	0.498	0.0101098
Xbp1	4.48242e-06	-0.225102	0.527	0.598	0.0465813
Fis1	4.26143e-07	-0.225334	0.316	0.43	0.00442848
bai	9.15192e-08	-0.225413	0.465	0.561	0.000951067
alt	2.52502e-05	-0.2266	0.584	0.616	0.2624
CG10960	3.22357e-09	-0.22682	0.129	0.252	3.34993e-05
CG42245	9.16669e-12	-0.22694	0.029	0.133	9.52602e-08
PGRP-LB	1.1766e-06	-0.227375	0.023	0.083	0.0122272
cup	5.10682e-09	-0.228384	0.055	0.147	5.307e-05
bin3	1.73653e-05	-0.228561	0.227	0.318	0.180461
klar	1.7665e-06	-0.228799	0.234	0.342	0.0183574
CG8209	2.6603e-10	-0.229752	0.1	0.222	2.76459e-06
PGRP-LF	1.25878e-07	-0.231254	0.094	0.187	0.00130813
Sr-CIII	6.14052e-12	-0.231509	0.02	0.12	6.38123e-08
h	0.00458714	-0.231814	0.293	0.342	1
Pfdn1	1.98504e-08	-0.231889	0.174	0.297	0.000206286
CG42455	8.72988e-07	-0.232496	0.127	0.219	0.0090721
NK7.1	6.68784e-08	-0.233241	0.043	0.122	0.000695
ham	2.92931e-05	-0.233451	0.168	0.248	0.304414
RpS13	2.18472e-19	-0.233907	0.982	0.975	2.27036e-15
UQCR-C1	1.34256e-06	-0.234354	0.334	0.442	0.0139519
Tpi	2.70736e-08	-0.234737	0.051	0.136	0.000281349
lost	6.15142e-09	-0.23588	0.762	0.759	6.39255e-05
28SrRNA-Psi:CR45855	0.000985111	-0.236598	0.105	0.159	1
Keap1	1.59174e-12	-0.239491	0.01	0.107	1.65413e-08
CG8177	9.05867e-05	-0.239693	0.273	0.349	0.941377
La	7.24579e-06	-0.24013	0.254	0.349	0.0752982
Prosalpha4	1.04071e-06	-0.240483	0.312	0.423	0.0108151
NHP2	4.36455e-06	-0.240554	0.211	0.308	0.0453564
Nurf-38	4.92317e-07	-0.241113	0.352	0.459	0.00511616
SmE	2.73132e-06	-0.241475	0.318	0.412	0.0283839
eRF1	5.2444e-09	-0.242042	0.209	0.341	5.44998e-05
mt:CoII	3.30818e-23	-0.242092	0.979	0.973	3.43786e-19
18SrRNA:CR45841	7.58815e-11	-0.242153	0.43	0.264	7.8856e-07
CG46385	4.42745e-05	-0.242336	0.312	0.391	0.460101
RpL6	1.58998e-18	-0.242339	0.988	0.977	1.65231e-14
rost	6.06787e-07	-0.242725	0.125	0.218	0.00630573
Ac78C	7.87684e-10	-0.243168	0.041	0.137	8.18561e-06
CG9396	2.2997e-09	-0.244794	0.047	0.14	2.38984e-05
viaf	4.62648e-08	-0.245475	0.195	0.316	0.000480784
Alh	7.024e-10	-0.246171	0.074	0.183	7.29934e-06
CG5446	2.11113e-06	-0.246239	0.256	0.357	0.0219389
Drs	0.000703805	-0.246388	0.275	0.205	1
CG31431	4.75042e-07	-0.247355	0.135	0.232	0.00493664
CG11267	1.76961e-07	-0.247432	0.576	0.637	0.00183898
CG30148	2.44406e-10	-0.24772	0.006	0.084	2.53987e-06
18SrRNA:CR41548	6.3325e-11	-0.248067	0.441	0.271	6.58073e-07
CG14464	5.70721e-10	-0.24821	0.125	0.254	5.93094e-06
lncRNA:CR45018	0.000426147	-0.249064	0.449	0.498	1
eEF1delta	1.27949e-08	-0.252481	0.539	0.618	0.000132964
emc	2.55724e-05	-0.252568	0.293	0.376	0.265748
mt:CoIII	1.95931e-17	-0.253516	0.891	0.933	2.03611e-13
PGRP-SA	7.96204e-11	-0.25396	0.01	0.094	8.27415e-07
Hsc70Cb	6.43489e-06	-0.254008	0.391	0.468	0.0668714
18SrRNA:CR45838	6.59785e-11	-0.254412	0.438	0.268	6.85649e-07
cl	9.80851e-06	-0.254631	0.486	0.555	0.10193
CG13364	1.04707e-09	-0.256755	0.357	0.495	1.08811e-05
kra	3.36216e-07	-0.25701	0.609	0.653	0.00349396
RpL27A	8.7326e-26	-0.259094	0.998	0.987	9.07491e-22
CG11791	0.000234462	-0.259414	0.275	0.341	1
Nrt	1.24377e-09	-0.25964	0.047	0.143	1.29253e-05
CG3376	2.04253e-10	-0.260839	0.141	0.275	2.12259e-06
bbc	6.05252e-08	-0.262638	0.164	0.273	0.000628978
levy	4.20502e-11	-0.262958	0.639	0.709	4.36985e-07
sd	5.34415e-09	-0.263185	0.158	0.278	5.55365e-05
Nhe2	4.98378e-12	-0.265663	0.045	0.159	5.17915e-08
CG8112	1.05469e-12	-0.265691	0.039	0.157	1.09603e-08
CG6126	1.08404e-12	-0.266282	0.074	0.209	1.12653e-08
His4r	3.02311e-13	-0.267359	0.641	0.699	3.14162e-09
RpL13	1.36133e-17	-0.26878	0.982	0.965	1.41469e-13
epsilonCOP	1.18081e-08	-0.26894	0.229	0.355	0.00012271
RpS3A	2.53628e-22	-0.271209	0.988	0.987	2.63571e-18
CG18747	1.76459e-12	-0.271354	0.047	0.167	1.83377e-08
CG6180	2.21828e-09	-0.27143	0.195	0.323	2.30524e-05
RpS6	1.04316e-16	-0.271484	0.992	0.963	1.08405e-12
Chmp1	5.75875e-06	-0.27357	0.303	0.393	0.0598449
capu	5.30424e-09	-0.27434	0.123	0.238	5.51216e-05
CHMP2B	2.50211e-12	-0.274578	0.066	0.193	2.6002e-08
CG2065	6.20558e-09	-0.274807	0.027	0.108	6.44884e-05
Rab1	5.82745e-09	-0.276347	0.484	0.589	6.05589e-05
trio	2.42988e-06	-0.27635	0.16	0.253	0.0252514
CG43175	0.675561	-0.27665	0.248	0.25	1
sel	3.74697e-06	-0.277894	0.293	0.391	0.0389385
GstD7	1.04308e-11	-0.278747	0.033	0.139	1.08397e-07
mod	1.13309e-05	-0.284104	0.426	0.491	0.117751
SerRS	6.07632e-09	-0.284127	0.232	0.358	6.31452e-05
Sec61beta	2.5408e-10	-0.285145	0.691	0.722	2.6404e-06
RpLP1	5.50608e-26	-0.28669	1	0.991	5.72192e-22
RpL18A	2.34438e-23	-0.287088	0.994	0.963	2.43628e-19
E(spl)mbeta-HLH	0.000174695	-0.287174	0.195	0.266	1
lncRNA:CR40469	1.18483e-10	-0.287673	0.275	0.385	1.23128e-06
RpS10b	1.66002e-21	-0.288799	0.986	0.978	1.72509e-17
alphaTub84B	1.30078e-12	-0.28932	0.945	0.92	1.35177e-08
CG9743	1.9383e-09	-0.290306	0.197	0.329	2.01428e-05
loco	2.53202e-07	-0.291403	0.189	0.293	0.00263128
CG4250	1.70041e-10	-0.291651	0.793	0.792	1.76707e-06
CG1890	3.16508e-06	-0.294835	0.494	0.545	0.0328915
Lip4	8.00674e-12	-0.296451	0.004	0.091	8.3206e-08
CG15611	8.17383e-13	-0.297447	0.076	0.21	8.49425e-09
NUCB1	3.10424e-12	-0.297516	0.541	0.659	3.22593e-08
Spn55B	1.7352e-10	-0.297781	0.078	0.191	1.80322e-06
CG33459	1.22607e-10	-0.298156	0.086	0.204	1.27413e-06
RpL30	3.90142e-19	-0.30224	0.955	0.93	4.05436e-15
Atg8a	1.80444e-07	-0.303655	0.477	0.557	0.00187518
Spn88Eb	1.74226e-05	-0.30659	0.227	0.308	0.181055
jtb	1.71051e-15	-0.309752	0.008	0.125	1.77757e-11
Dyak-Scsalpha	3.17786e-09	-0.31022	0.145	0.26	3.30243e-05
RpL32	2.4221e-24	-0.310392	0.969	0.955	2.51705e-20
CG16713	4.21792e-07	-0.310687	0.002	0.051	0.00438326
RhoGAP18B	1.77465e-09	-0.310947	0.139	0.256	1.84422e-05
CkIIalpha	2.00371e-09	-0.311005	0.279	0.408	2.08226e-05
CG12133	1.01731e-09	-0.313723	0.002	0.072	1.05719e-05
ND-15	2.68896e-12	-0.318542	0.273	0.428	2.79437e-08
Yeti	1.37169e-09	-0.319076	0.377	0.486	1.42546e-05
RpS14b	3.08462e-14	-0.321084	0.693	0.721	3.20554e-10
CG5346	1.42459e-10	-0.323553	0.129	0.254	1.48043e-06
CG6023	8.57355e-08	-0.325627	0.002	0.057	0.000890964
RpL14	4.95979e-21	-0.325718	0.994	0.977	5.15422e-17
ATPsynF	6.49103e-13	-0.326998	0.625	0.677	6.74548e-09
prage	3.14776e-14	-0.327055	0.037	0.164	3.27116e-10
eIF5B	2.65453e-10	-0.329855	0.242	0.379	2.75859e-06
hebe	6.2624e-14	-0.331661	0.002	0.103	6.50788e-10
CG33465	1.27036e-11	-0.33189	0.234	0.382	1.32016e-07
ATPsynC	4.61096e-21	-0.334101	0.949	0.931	4.79171e-17
NijA	8.38569e-12	-0.336071	0.055	0.17	8.71441e-08
UQCR-14	2.58058e-12	-0.339583	0.416	0.537	2.68174e-08
RpL28	3.67805e-23	-0.340091	0.982	0.969	3.82223e-19
CAP	3.09448e-15	-0.340352	0.014	0.134	3.21578e-11
CG42674	3.00561e-10	-0.345082	0.139	0.262	3.12343e-06
Glo1	3.49894e-11	-0.345187	0.361	0.487	3.6361e-07
Cyt-c1	2.43885e-10	-0.346809	0.299	0.429	2.53446e-06
CG11686	2.83363e-11	-0.34875	0.141	0.274	2.94471e-07
CG12112	4.86729e-12	-0.350233	0.092	0.219	5.05808e-08
Mtk	3.76595e-12	-0.351478	0.418	0.267	3.91357e-08
RpL36	5.55423e-26	-0.353766	0.984	0.961	5.77195e-22
CG5953	1.64443e-13	-0.354998	0.062	0.192	1.70889e-09
eIF3k	2.70936e-12	-0.35533	0.41	0.532	2.81557e-08
Adk2	1.9855e-09	-0.356604	0.428	0.516	2.06334e-05
18SrRNA-Psi:CR45861	8.16796e-06	-0.358744	0.334	0.22	0.0848814
mt:ATPase6	2.6317e-23	-0.359661	0.846	0.89	2.73486e-19
Men	0.507374	-0.36025	0.473	0.484	1
Arf102F	2.20684e-11	-0.36044	0.393	0.509	2.29335e-07
RpS26	7.24179e-28	-0.362992	0.986	0.965	7.52567e-24
smt3	2.80406e-19	-0.363262	0.803	0.824	2.91398e-15
tsr	6.80743e-22	-0.363264	0.988	0.967	7.07429e-18
IP3K1	9.46352e-09	-0.366783	0.113	0.217	9.83449e-05
PPO3	0.00286877	-0.367396	0.023	0.053	1
CG6006	9.12111e-10	-0.369458	0.061	0.161	9.47866e-06
RpS18	6.66743e-24	-0.369762	0.949	0.928	6.9288e-20
alphaTub85E	9.81692e-05	-0.370828	0.326	0.241	1
hdly	1.11854e-09	-0.371446	0.316	0.428	1.16239e-05
Nph	1.15007e-10	-0.373185	0.354	0.476	1.19515e-06
Dbp80	1.253e-12	-0.375655	0.184	0.332	1.30211e-08
CG9922	3.77522e-13	-0.375965	0.174	0.328	3.92321e-09
NimB1	9.07207e-13	-0.379994	0.172	0.32	9.4277e-09
Adgf-A	1.1786e-09	-0.380941	0.281	0.399	1.22481e-05
Arc2	7.84706e-15	-0.385303	0.049	0.183	8.15466e-11
mnd	3.26583e-11	-0.385887	0.191	0.325	3.39385e-07
dpr17	6.26008e-14	-0.388904	0.008	0.113	6.50548e-10
GstO3	3.2358e-09	-0.392593	0.482	0.55	3.36264e-05
CG7215	1.93613e-15	-0.395789	0.096	0.246	2.01202e-11
shrb	1.6644e-13	-0.397888	0.291	0.442	1.72964e-09
CG4793	6.09974e-17	-0.400457	0.016	0.149	6.33885e-13
Cyt-c-p	6.32443e-12	-0.400786	0.426	0.532	6.57235e-08
Dyak-FKBP59	1.90477e-14	-0.403817	0.107	0.255	1.97944e-10
RpL9	1.01704e-25	-0.405626	0.938	0.916	1.05691e-21
CG2865	2.74297e-08	-0.413966	0.273	0.381	0.000285049
AnxB9	4.62604e-09	-0.415778	0.762	0.748	4.80738e-05
CG42566	4.13506e-08	-0.41714	0.498	0.582	0.000429715
RapGAP1	8.50014e-08	-0.418884	0.318	0.423	0.000883335
tx	7.23057e-16	-0.420409	0.004	0.12	7.51401e-12
awd	3.80247e-31	-0.421499	0.963	0.945	3.95153e-27
GstD1	2.1468e-16	-0.423986	0.965	0.93	2.23095e-12
CG32066	5.87232e-15	-0.425104	0.135	0.293	6.10252e-11
GstD3	1.62873e-08	-0.428213	0.309	0.412	0.000169258
vib	3.14428e-14	-0.431177	0.232	0.385	3.26753e-10
CG9932	1.40804e-08	-0.433401	0.227	0.337	0.000146323
PRL-1	4.09958e-13	-0.44116	0.209	0.344	4.26028e-09
GstE6	7.06803e-14	-0.442035	0.287	0.442	7.3451e-10
Gclc	2.43218e-16	-0.447138	0.068	0.219	2.52752e-12
CG43210	4.27421e-11	-0.456217	0.143	0.26	4.44176e-07
GILT3	1.37297e-20	-0.457602	0.012	0.165	1.42679e-16
CG31219	1.19739e-14	-0.460791	0.027	0.149	1.24433e-10
28SrRNA-Psi:CR45859	3.36306e-10	-0.460893	0.215	0.341	3.49489e-06
Dro	3.7954e-09	-0.468733	0	0.064	3.94418e-05
18SrRNA-Psi:CR41602	0.00321219	-0.469536	0.416	0.452	1
Arc1	6.11407e-14	-0.472584	0.447	0.556	6.35375e-10
CG43124	5.94008e-10	-0.473707	0.41	0.498	6.17294e-06
Thor	2.03091e-12	-0.473948	0.064	0.184	2.11052e-08
IM18	1.2603e-09	-0.480221	0.01	0.085	1.3097e-05
CG13868	2.43228e-18	-0.492652	0.104	0.278	2.52762e-14
GstE1	8.24446e-15	-0.500625	0.111	0.262	8.56764e-11
pirk	7.42206e-17	-0.501161	0.066	0.218	7.713e-13
CecB	1.0509e-11	-0.502724	0	0.083	1.09209e-07
CG33461	1.15711e-23	-0.503918	0.004	0.173	1.20247e-19
RpL18	6.34476e-32	-0.50653	0.965	0.943	6.59348e-28
RpS12	4.82395e-27	-0.512495	0.986	0.951	5.01305e-23
mthl6	1.64134e-22	-0.519852	0.021	0.194	1.70568e-18
Ance	2.88375e-06	-0.524516	0.5	0.554	0.0299679
Tep4	1.28809e-11	-0.527676	0.441	0.551	1.33858e-07
mt:Cyt-b	3.69147e-35	-0.535771	0.852	0.9	3.83618e-31
sea	5.00345e-17	-0.540974	0.174	0.334	5.19959e-13
GstE2	3.85261e-20	-0.553669	0.041	0.206	4.00363e-16
Eglp4	1.32206e-19	-0.577091	0.102	0.279	1.37388e-15
He	6.04588e-40	-0.58743	0.758	0.824	6.28287e-36
mthl4	5.60765e-17	-0.588918	0.021	0.155	5.82747e-13
CecA1	8.1673e-11	-0.600918	0.012	0.097	8.48745e-07
Rel	2.28551e-15	-0.601179	0.254	0.395	2.3751e-11
CG33225	1.23397e-06	-0.609228	0.133	0.215	0.0128234
Gapdh2	3.71674e-17	-0.611759	0.324	0.475	3.86243e-13
CG17760	4.37474e-22	-0.612464	0.068	0.254	4.54623e-18
CG42807	6.64357e-10	-0.618429	0.498	0.575	6.904e-06
puc	1.30746e-26	-0.650799	0.098	0.318	1.35871e-22
Psc	6.1807e-23	-0.659126	0.09	0.287	6.42298e-19
Irk1	1.80946e-22	-0.6933	0.074	0.259	1.88039e-18
Nplp2	1.73502e-51	-0.705033	0.982	0.99	1.80303e-47
CG1572	2.74368e-33	-0.733207	0.525	0.676	2.85123e-29
CG44250	2.37517e-25	-0.734076	0.023	0.212	2.46827e-21
CG30090	9.56674e-25	-0.739701	0.023	0.207	9.94175e-21
CG14253	1.11756e-30	-0.765929	0.277	0.491	1.16137e-26
lncRNA:CR44316	1.59923e-18	-0.775637	0.004	0.139	1.66192e-14
sesB	4.7807e-34	-0.778912	0.891	0.882	4.96811e-30
CG1648	3.20911e-29	-0.794554	0.014	0.224	3.33491e-25
LamC	6.52295e-28	-0.803947	0.135	0.355	6.77865e-24
Jra	2.61189e-21	-0.812566	0.24	0.409	2.71428e-17
CG10467	0.0018991	-0.834845	0.062	0.106	1
CG30283	1.79664e-34	-0.83511	0.018	0.257	1.86707e-30
Mmp1	1.81825e-15	-0.903549	0.164	0.317	1.88953e-11
CG3348	4.0303e-20	-0.909911	0.031	0.19	4.18829e-16
lectin-24A	2.29022e-18	-0.917024	0.029	0.175	2.37999e-14
atilla	1.16956e-06	-0.944311	0.02	0.076	0.012154
fok	0.017662	-0.976109	0.135	0.1	1
kay	1.98567e-28	-0.990894	0.262	0.459	2.06351e-24
betaTub60D	0.000610362	-0.990958	0.045	0.087	1
CecA2	1.99491e-16	-1.03469	0.004	0.124	2.07312e-12
CecC	1.56846e-13	-1.09867	0.078	0.204	1.62995e-09
MtnA	0.000107253	-1.14774	0.219	0.292	1
CG5399	1.56527e-19	-1.17875	0.133	0.301	1.62662e-15
CG15347	8.11531e-24	-1.21098	0.055	0.245	8.43343e-20
CG8620	9.38065e-29	-1.21529	0.156	0.372	9.74838e-25
CG33460	4.83046e-38	-1.22539	0.102	0.361	5.01981e-34
lncRNA:CR43855	6.64954e-37	-1.24272	0.367	0.584	6.9102e-33
Tep1	1.58808e-35	-1.32265	0.143	0.394	1.65033e-31
PPO1	0.000304697	-1.58503	0.291	0.212	1
PPO2	4.59914e-06	-1.67516	0.381	0.279	0.0477942
CG42394	1.22531e-49	-1.87566	0.408	0.633	1.27335e-45
CG8157	6.15013e-62	-2.40545	0.688	0.802	6.39122e-58

## Sheet: PM10
gene	cluster13.p_val	cluster13.avg_logFC	cluster13.pct.1	cluster13.pct.2	cluster13.p_val_adj
IA-2	3.72447e-95	1.91972	0.07	0.002	3.87047e-91
cpx	1.79065e-45	1.64328	0.28	0.062	1.86084e-41
Rdl	2.8586e-129	1.62845	0.07	0.001	2.97066e-125
nrv3	4.57469e-18	1.45547	0.465	0.248	4.75402e-14
nSyb	2.47823e-170	1.37005	0.082	0.001	2.57537e-166
Rbp6	3.55158e-127	1.33099	0.082	0.002	3.69081e-123
Appl	1.21373e-102	1.26324	0.074	0.002	1.2613e-98
Pglym78	0.24731	1.15931	0.185	0.175	1
lncRNA:noe	6.67782e-35	1.13195	0.053	0.003	6.93959e-31
chrb	8.76678e-21	1.13182	0.292	0.113	9.11044e-17
Sh	5.35285e-59	1.12376	0.07	0.003	5.56268e-55
Argk	1.86477e-75	1.07671	0.091	0.004	1.93787e-71
fne	4.48825e-08	1.06152	0.111	0.043	0.000466419
l(3)neo38	4.94051e-104	1.00236	0.193	0.015	5.13418e-100
CG6329	1.3383e-23	0.997719	0.074	0.009	1.39076e-19
CG13928	8.45293e-83	0.976796	0.074	0.002	8.78429e-79
Sap47	0.361373	0.959142	0.251	0.255	1
Atpalpha	1.29167e-08	0.931879	0.728	0.609	0.00013423
fax	2.17515e-38	0.910844	0.72	0.358	2.26041e-34
futsch	7.23323e-35	0.904666	0.07	0.006	7.51677e-31
sif	6.78789e-117	0.874938	0.078	0.002	7.05398e-113
Abl	4.17621e-16	0.860244	0.613	0.459	4.33992e-12
Syt1	4.6206e-07	0.858276	0.206	0.108	0.00480173
Snoo	8.15169e-22	0.843396	0.634	0.406	8.47124e-18
igl	1.99553e-153	0.841994	0.053	0	2.07376e-149
CG2269	1.72699e-146	0.833442	0.058	0	1.79469e-142
Hex-A	0.59968	0.813034	0.222	0.229	1
sm	8.8427e-28	0.811968	0.111	0.017	9.18933e-24
Snap25	1.35251e-89	0.799828	0.07	0.002	1.40553e-85
bol	5.7199e-35	0.788434	0.156	0.027	5.94412e-31
Ggamma30A	1.88886e-05	0.779647	0.572	0.434	0.19629
Tpi	0.61428	0.777245	0.132	0.134	1
CG3662	1.55348e-30	0.767608	0.288	0.087	1.61437e-26
unc-13	0.00381797	0.740144	0.082	0.046	1
para	9.13691e-30	0.719368	0.07	0.007	9.49507e-26
TM4SF	1.49496e-14	0.713141	0.243	0.099	1.55356e-10
Pgi	1.42548e-06	0.710299	0.23	0.139	0.0148135
7B2	1.47387e-237	0.708035	0.07	0	1.53165e-233
tutl	1.35922e-49	0.696035	0.062	0.003	1.4125e-45
kcc	0.00369426	0.68645	0.156	0.108	1
stai	9.56392e-05	0.686092	0.128	0.069	0.993882
mei-P26	0.000461318	0.671534	0.395	0.33	1
Galphao	0.0619375	0.669796	0.288	0.265	1
CG7781	7.42801e-06	0.664421	0.058	0.019	0.0771919
nAChRalpha1	4.47301e-132	0.657225	0.053	0	4.64835e-128
Eno	0.119845	0.642572	0.506	0.511	1
nAChRalpha5	1.26838e-156	0.628507	0.066	0.001	1.3181e-152
Gapdh2	0.00199047	0.620416	0.37	0.472	1
Ank2	2.21251e-69	0.604822	0.053	0.001	2.29924e-65
GlyP	5.74171e-11	0.604281	0.107	0.033	5.96678e-07
VhaM9.7-a	3.49701e-41	0.603117	0.053	0.003	3.63409e-37
Pal2	1.30463e-20	0.59143	0.062	0.008	1.35577e-16
OtopLa	1.16101e-52	0.584708	0.062	0.003	1.20652e-48
abd-A	1.7896e-111	0.572731	0.058	0.001	1.85975e-107
Hsp23	1.08703e-27	0.569982	0.712	0.372	1.12964e-23
dysc	5.30388e-66	0.563936	0.053	0.002	5.51179e-62
scrt	8.76396e-121	0.559334	0.053	0.001	9.10751e-117
CG32264	0.00808711	0.553296	0.193	0.146	1
Gapdh1	0.841007	0.54176	0.342	0.395	1
cpo	0.244849	0.538285	0.107	0.092	1
CG31140	2.4779e-68	0.535302	0.058	0.002	2.57503e-64
jdp	0.665528	0.519494	0.066	0.062	1
Uhg7	3.65173e-11	0.51575	0.543	0.367	3.79488e-07
Ric	0.000727157	0.512233	0.123	0.072	1
Pka-C1	0.00959454	0.511607	0.251	0.206	1
CASK	0.000265567	0.510124	0.111	0.06	1
EGFP	6.3608e-11	0.503626	0.531	0.348	6.61014e-07
elav	1.81297e-06	0.5017	0.111	0.047	0.0188404
rg	1.61017e-15	0.500574	0.058	0.009	1.67329e-11
Dhit	2.42443e-05	0.498846	0.107	0.05	0.251947
udd	1.12692e-13	0.497837	0.514	0.315	1.17109e-09
cac	5.4171e-61	0.496111	0.062	0.002	5.62945e-57
Nckx30C	1.68246e-13	0.483668	0.07	0.014	1.74841e-09
Frq1	1.76499e-57	0.483226	0.053	0.002	1.83418e-53
Vha68-1	4.46097e-28	0.46885	0.058	0.005	4.63584e-24
Ih	0.00349473	0.467113	0.078	0.042	1
vkg	1.01896e-16	0.464503	0.901	0.745	1.0589e-12
eEF1gamma	4.4459e-23	0.463923	0.877	0.625	4.62018e-19
dnc	6.19385e-06	0.463068	0.317	0.222	0.0643665
fabp	1.40913e-17	0.463035	0.535	0.281	1.46437e-13
unc-104	1.97253e-06	0.460428	0.062	0.02	0.0204985
Sdc	0.000342827	0.444125	0.198	0.128	1
slgA	0.199737	0.438269	0.082	0.066	1
CG3961	1.54228e-14	0.437739	0.51	0.291	1.60274e-10
Hsp26	2.16285e-21	0.434959	0.737	0.408	2.24763e-17
LanB2	4.73412e-20	0.433153	0.885	0.704	4.9197e-16
Ubx	2.94482e-21	0.433103	0.918	0.666	3.06026e-17
sbb	0.0102044	0.432108	0.28	0.234	1
His3.3B	6.26635e-13	0.432107	0.807	0.72	6.51199e-09
P5CDh1	5.13819e-06	0.430965	0.247	0.154	0.0533961
luna	1.0305e-15	0.426241	0.72	0.509	1.07089e-11
Hsp27	1.08707e-11	0.425525	0.523	0.342	1.12969e-07
Col4a1	1.86515e-19	0.425214	0.909	0.67	1.93826e-15
CG17839	2.24783e-11	0.421399	0.337	0.176	2.33595e-07
vsg	2.87387e-21	0.421069	0.93	0.902	2.98653e-17
mub	0.0145963	0.418405	0.14	0.1	1
CG17816	2.35048e-10	0.414036	0.053	0.011	2.44262e-06
Tob	3.08745e-15	0.400246	0.136	0.039	3.20847e-11
CG7646	3.7359e-10	0.399336	0.07	0.017	3.88234e-06
eIF4E1	1.3125e-11	0.399287	0.514	0.327	1.36395e-07
CG12071	0.00105978	0.39855	0.053	0.023	1
PyK	2.84816e-10	0.398231	0.65	0.52	2.95981e-06
Ten-m	9.62055e-16	0.397469	0.761	0.518	9.99768e-12
CG8501	3.09581e-18	0.3934	0.909	0.686	3.21716e-14
shep	6.54035e-10	0.392604	0.922	0.873	6.79673e-06
Pdxk	1.45297e-10	0.392254	0.288	0.148	1.50993e-06
mam	0.0104022	0.392073	0.374	0.326	1
eEF1alpha1	1.20756e-22	0.38952	0.914	0.68	1.2549e-18
fat-spondin	1.12525e-17	0.389443	0.811	0.532	1.16936e-13
CG4612	1.77737e-05	0.388736	0.136	0.069	0.184704
eEF2	1.29613e-17	0.385678	0.909	0.659	1.34694e-13
Hsp70Bc	4.75275e-09	0.384717	0.383	0.231	4.93906e-05
Gs1	4.3934e-07	0.383909	0.251	0.146	0.00456562
eIF3a	1.37091e-09	0.38303	0.498	0.33	1.42465e-05
Pgk	0.0947424	0.381695	0.193	0.267	1
CaMKII	0.471948	0.380078	0.189	0.231	1
Glt	3.78498e-19	0.378324	0.909	0.78	3.93335e-15
Hsp70Ab	1.38816e-08	0.375092	0.214	0.103	0.000144258
Ten-a	3.70947e-05	0.370594	0.095	0.042	0.385488
LanA	3.7689e-17	0.366364	0.901	0.738	3.91664e-13
CG2082	2.60863e-12	0.365649	0.148	0.05	2.71089e-08
Rap1	3.01748e-14	0.365264	0.757	0.507	3.13577e-10
Hsp70Aa	1.18615e-07	0.362841	0.202	0.1	0.00123265
tna	4.12967e-05	0.360475	0.243	0.154	0.429155
CanA-14F	0.0318921	0.355673	0.226	0.189	1
DCP2	3.22485e-07	0.350785	0.321	0.206	0.00335126
CG13917	0.00965552	0.349743	0.148	0.103	1
Sxl	0.0352066	0.348841	0.284	0.255	1
AP-1-2beta	6.20426e-06	0.34828	0.379	0.276	0.0644747
CG10077	0.0090831	0.347824	0.362	0.324	1
eIF3m	1.41028e-12	0.345717	0.527	0.315	1.46557e-08
Ance-5	2.99777e-12	0.34215	0.794	0.567	3.11529e-08
AGO1	6.9308e-05	0.336772	0.543	0.482	0.720248
AP-2mu	3.50681e-07	0.336553	0.449	0.327	0.00364428
Pfk	2.82473e-08	0.336353	0.099	0.035	0.000293546
CG42711	5.28248e-11	0.336336	0.663	0.462	5.48955e-07
eIF4A	1.99816e-14	0.332982	0.897	0.651	2.07649e-10
Slik	2.47563e-09	0.332642	0.383	0.229	2.57267e-05
Csp	0.0169206	0.332481	0.288	0.252	1
Imp	0.000222937	0.332092	0.749	0.727	1
heph	0.0601774	0.32938	0.144	0.115	1
ush	9.14045e-11	0.326928	0.379	0.213	9.49876e-07
mtd	0.0371239	0.326383	0.267	0.23	1
SPARC	8.49447e-14	0.325023	0.905	0.667	8.82746e-10
Mlf	1.47168e-07	0.323827	0.23	0.125	0.00152937
bun	2.13608e-07	0.322795	0.778	0.692	0.00221982
CG5056	0.000127517	0.31963	0.128	0.069	1
l(2)k09913	2.09868e-07	0.319536	0.321	0.201	0.00218095
CG42748	8.97949e-08	0.318885	0.329	0.2	0.000933148
Calr	7.74131e-15	0.318588	0.877	0.605	8.04477e-11
endos	9.72863e-05	0.316736	0.305	0.225	1
Mp	0.360546	0.314062	0.041	0.057	1
fz2	0.0897884	0.312787	0.07	0.049	1
crp	3.79004e-05	0.309913	0.395	0.306	0.393861
Hsp70Ba	0.000119895	0.308057	0.128	0.067	1
COX7C	9.10779e-12	0.307816	0.753	0.492	9.46481e-08
Had2	1.34442e-10	0.307728	0.667	0.476	1.39712e-06
CG3328	3.93396e-09	0.307599	0.395	0.238	4.08818e-05
Nepl21	1.73558e-08	0.306966	0.407	0.253	0.000180362
eIF1A	1.0729e-11	0.305915	0.728	0.476	1.11496e-07
Unr	7.00823e-08	0.305695	0.77	0.677	0.000728295
mbl	0.866835	0.304383	0.123	0.136	1
Sap-r	2.72298e-08	0.303716	0.798	0.732	0.000282972
CG17124	0.144486	0.303301	0.062	0.044	1
Evi5	0.0027641	0.303091	0.144	0.093	1
CG34401	0.324978	0.300174	0.095	0.082	1
Gyc76C	8.17618e-07	0.2998	0.202	0.103	0.00849669
nmo	0.382497	0.299323	0.16	0.151	1
comt	5.58099e-05	0.298635	0.066	0.025	0.579976
CG16974	0.000325207	0.296299	0.226	0.155	1
beta-Spec	0.000512855	0.296266	0.263	0.194	1
Hsp70Bbb	0.000308952	0.294477	0.123	0.066	1
Bsg	3.17794e-05	0.294175	0.675	0.625	0.330252
COX6B	1.11796e-09	0.29374	0.634	0.429	1.16179e-05
Tlk	4.44493e-09	0.293084	0.309	0.168	4.61917e-05
Pxn	1.8155e-11	0.290825	0.914	0.795	1.88667e-07
eIF4H1	5.80633e-09	0.290222	0.7	0.513	6.03394e-05
Traf-like	3.70419e-05	0.286366	0.383	0.27	0.38494
CG34232	1.47924e-05	0.284699	0.395	0.269	0.153723
Lpin	0.00271318	0.283335	0.107	0.063	1
Drat	0.0779826	0.283004	0.099	0.072	1
Vap33	4.1666e-11	0.282521	0.765	0.522	4.32993e-07
Rb97D	0.000157517	0.282246	0.165	0.099	1
CG33057	6.9416e-07	0.28203	0.218	0.116	0.00721371
ena	1.32825e-05	0.280657	0.457	0.344	0.138032
Ugt317A1	4.14308e-09	0.280156	0.346	0.195	4.30549e-05
mib2	4.85379e-06	0.280148	0.296	0.194	0.0504406
Tig	8.03294e-08	0.279893	0.679	0.536	0.000834783
CR43482	1.04002e-11	0.279737	0.202	0.08	1.08079e-07
CG42637	6.74644e-07	0.279282	0.177	0.086	0.00701091
Pdha	7.13949e-08	0.277412	0.346	0.207	0.000741935
Lon	0.000215438	0.276257	0.428	0.334	1
Gdi	1.40383e-06	0.276079	0.753	0.685	0.0145886
Gabat	6.79486e-05	0.276025	0.119	0.06	0.706122
swm	0.00379219	0.275848	0.226	0.171	1
Syp	4.02539e-10	0.275754	0.86	0.768	4.18319e-06
Smr	1.32861e-06	0.274732	0.556	0.448	0.0138069
pnut	0.024698	0.274693	0.399	0.373	1
EndoA	0.0909	0.273335	0.16	0.132	1
Cpr49Ac	0.000912392	0.272579	0.103	0.055	1
eEF5	7.95941e-11	0.272178	0.901	0.665	8.27142e-07
kar	0.000191838	0.271516	0.193	0.119	1
mahe	0.0108678	0.271417	0.292	0.243	1
UGP	1.08176e-05	0.27141	0.337	0.228	0.112416
Syx1A	0.428306	0.270955	0.37	0.428	1
MFS3	0.000303524	0.270902	0.214	0.14	1
Atet	4.36506e-09	0.269322	0.119	0.043	4.53617e-05
Pka-R1	0.344409	0.268178	0.128	0.116	1
svr	1.64182e-06	0.267831	0.572	0.45	0.0170618
Pdp1	0.781668	0.26491	0.313	0.36	1
mkg-p	4.50114e-05	0.264824	0.235	0.145	0.467758
RnrS	0.000119048	0.264592	0.333	0.242	1
Cp1	8.98473e-10	0.263717	0.905	0.891	9.33694e-06
Hsp70Bb	0.00465988	0.262934	0.14	0.09	1
nocte	0.0468475	0.262755	0.412	0.396	1
CG42369	1.21767e-06	0.262076	0.436	0.293	0.012654
LKRSDH	3.70812e-06	0.261408	0.329	0.211	0.0385348
mura	0.000103957	0.261406	0.251	0.165	1
jim	0.218435	0.261362	0.181	0.164	1
lola	0.000141638	0.261164	0.613	0.557	1
Zasp52	1.89441e-05	0.259568	0.313	0.207	0.196867
sn	0.000459583	0.259458	0.169	0.103	1
Spred	0.0215464	0.25919	0.189	0.146	1
Irp-1B	0.0263399	0.258524	0.152	0.114	1
Galphas	0.011576	0.258106	0.288	0.243	1
CG43759	1.47359e-05	0.257963	0.165	0.088	0.153135
Lsd-2	0.0222256	0.257346	0.337	0.294	1
ATPsynB	3.36849e-07	0.256759	0.453	0.299	0.00350053
Got2	2.11296e-05	0.25536	0.556	0.47	0.219579
Gbeta13F	1.40312e-05	0.255184	0.881	0.832	0.145812
mei-38	2.35901e-06	0.254988	0.305	0.184	0.0245148
Cat	0.000152471	0.254298	0.337	0.25	1
csw	0.593316	0.254277	0.128	0.125	1
Gal	1.03687e-06	0.254229	0.272	0.158	0.0107752
Plod	1.24929e-06	0.253817	0.7	0.592	0.0129826
NaCP60E	7.41203e-05	0.253681	0.074	0.031	0.770258
Fum1	1.49369e-06	0.253484	0.317	0.197	0.0155224
Sep1	0.000266686	0.253415	0.407	0.334	1
l(1)G0289	7.26564e-07	0.252989	0.733	0.556	0.00755045
scramb2	0.0137294	0.252899	0.263	0.218	1
Fkbp12	3.28053e-05	0.252832	0.547	0.421	0.340913
CG9674	0.0219851	0.25139	0.103	0.068	1
tral	0.000377179	0.250833	0.391	0.319	1
CG31688	1.30641e-06	0.25074	0.062	0.019	0.0135763
Smox	0.0062091	0.248676	0.383	0.335	1
lncRNA:CR42491	0.000135389	0.248634	0.457	0.357	1
CG5009	1.32694e-06	0.248207	0.144	0.068	0.0137895
Nca	0.0202331	0.248065	0.23	0.189	1
CG10431	2.65941e-06	0.247425	0.3	0.179	0.0276366
Sin3A	0.124268	0.246765	0.202	0.178	1
exd	0.0132413	0.246657	0.259	0.214	1
CG9331	0.000834723	0.246465	0.556	0.515	1
kat-60L1	3.94979e-08	0.245936	0.103	0.036	0.000410462
GCS2alpha	4.12507e-06	0.245544	0.671	0.592	0.0428677
Ppn	3.5177e-08	0.245324	0.918	0.901	0.00036556
Pgant5	7.88173e-07	0.244798	0.259	0.148	0.00819069
Orct	0.000349013	0.243847	0.214	0.138	1
Pepck1	5.39174e-08	0.243358	0.095	0.032	0.00056031
CG45087	5.39174e-08	0.243358	0.095	0.032	0.00056031
Nepl19	5.39432e-06	0.243202	0.531	0.399	0.0560578
ATPsyngamma	6.18703e-08	0.243186	0.457	0.287	0.000642956
shi	0.69238	0.242837	0.37	0.401	1
Tis11	4.33018e-08	0.242651	0.77	0.653	0.000449992
spen	0.189459	0.242168	0.519	0.506	1
Snx6	0.00191774	0.24126	0.469	0.411	1
CG6770	0.0701934	0.241219	0.305	0.276	1
LanB1	7.73571e-10	0.240503	0.909	0.856	8.03895e-06
COX4	8.72718e-08	0.240324	0.634	0.437	0.000906929
MESK2	0.0900559	0.239941	0.436	0.422	1
enc	0.554271	0.239805	0.095	0.089	1
Fer1HCH	6.63644e-07	0.239724	0.72	0.638	0.00689659
br	5.53728e-05	0.239218	0.407	0.307	0.575434
CG31324	0.000142305	0.238905	0.687	0.61	1
kek1	0.00690109	0.238141	0.226	0.171	1
cv-d	1.47692e-05	0.238105	0.568	0.463	0.153481
mAcon1	5.76536e-06	0.237925	0.358	0.237	0.0599136
stau	0.0510446	0.237222	0.111	0.081	1
Fer2LCH	9.45501e-11	0.236684	0.893	0.808	9.82565e-07
CG3625	0.54917	0.236412	0.082	0.076	1
Sra-1	0.000278876	0.236222	0.305	0.222	1
DnaJ-1	3.96725e-05	0.235952	0.498	0.403	0.412276
CG1317	3.30586e-05	0.235937	0.173	0.098	0.343545
Spn	0.000830401	0.235848	0.144	0.086	1
Unc-76	0.0253508	0.235649	0.177	0.136	1
NimB3	2.36912e-06	0.235351	0.288	0.173	0.0246199
loqs	0.000256149	0.235088	0.07	0.03	1
ps	7.64902e-09	0.235013	0.947	0.904	7.94886e-05
CG4829	2.46409e-05	0.234867	0.49	0.359	0.256068
CG1440	0.05099	0.23431	0.337	0.312	1
ATPsynbeta	2.32732e-07	0.23406	0.687	0.487	0.00241856
CCT6	1.6693e-05	0.233902	0.387	0.264	0.173474
Pgm2a	4.09694e-05	0.233538	0.23	0.142	0.425754
stx	0.211606	0.233122	0.123	0.105	1
CCT7	2.88283e-07	0.232156	0.469	0.306	0.00299584
Diap2	0.00388982	0.231685	0.156	0.106	1
CG10859	0.000792777	0.231644	0.206	0.136	1
Tat	0.00381595	0.231245	0.111	0.067	1
Actn	0.00047617	0.230479	0.185	0.119	1
CCT3	6.2637e-06	0.230269	0.506	0.36	0.0650924
Chc	4.88848e-06	0.230147	0.642	0.538	0.0508011
eEF1beta	4.5495e-07	0.229721	0.716	0.518	0.00472784
CG12290	0.00335438	0.229669	0.198	0.14	1
lap	0.137513	0.229323	0.272	0.253	1
Zn72D	0.0467344	0.229108	0.128	0.095	1
Dyrk3	0.117577	0.229067	0.198	0.174	1
CG1275	7.72767e-05	0.228753	0.222	0.138	0.80306
Nct	1.64128e-06	0.228618	0.214	0.117	0.0170562
Prosap	0.000102875	0.228042	0.671	0.593	1
Ggamma1	0.00539134	0.227931	0.807	0.743	1
lncRNA:CR34335	6.789e-14	0.227827	0.975	0.972	7.05513e-10
sdt	3.69997e-06	0.227337	0.058	0.018	0.0384501
Ama	3.44162e-06	0.226365	0.177	0.091	0.0357654
CG31712	0.199026	0.226224	0.177	0.161	1
agt	7.07863e-05	0.226206	0.325	0.22	0.735611
eIF3c	1.19904e-05	0.226172	0.403	0.285	0.124604
Ndae1	5.68178e-05	0.225873	0.407	0.301	0.59045
Mtap	0.0127912	0.225498	0.21	0.161	1
eIF3j	6.32057e-07	0.225372	0.383	0.242	0.00656833
Rop	0.692115	0.224646	0.28	0.301	1
eIF2alpha	9.54804e-05	0.22451	0.416	0.305	0.992232
CG7120	0.000432817	0.223999	0.296	0.212	1
CG32767	0.231923	0.223911	0.173	0.156	1
Scsalpha1	0.000135591	0.223825	0.329	0.23	1
ND-ACP	2.44063e-05	0.223566	0.391	0.274	0.25363
ND-42	9.80338e-05	0.223289	0.239	0.153	1
CG7971	0.134778	0.223218	0.189	0.256	1
lectin-28C	3.95594e-07	0.223081	0.823	0.635	0.00411101
PH4alphaEFB	0.000162824	0.222915	0.407	0.312	1
CG30344	0.000327849	0.221674	0.387	0.3	1
ND-PDSW	1.08321e-05	0.220858	0.35	0.233	0.112567
CG17754	0.00286513	0.220413	0.128	0.079	1
Sps1	9.63472e-07	0.220277	0.263	0.152	0.0100124
GstE11	1.12511e-05	0.219323	0.177	0.096	0.116922
mrva	0.00145873	0.219255	0.424	0.358	1
CG15083	3.02122e-05	0.219091	0.251	0.157	0.313965
Ykt6	0.0719607	0.218343	0.193	0.162	1
lncRNA:Hsromega	2.18232e-05	0.21803	0.523	0.364	0.226787
Idh3a	8.41278e-07	0.217634	0.453	0.295	0.00874256
CG7627	3.87471e-05	0.217629	0.267	0.172	0.40266
CG7194	0.0410501	0.217601	0.156	0.117	1
Cdc42	1.0237e-05	0.217401	0.741	0.694	0.106383
CG9646	0.981884	0.216914	0.115	0.124	1
CG5973	0.00047198	0.216765	0.407	0.315	1
Corin	0.0525084	0.216515	0.099	0.07	1
eIF4EHP	0.000117916	0.216313	0.288	0.194	1
Vha100-1	0.404077	0.216279	0.16	0.154	1
Cirl	0.301767	0.215843	0.136	0.12	1
cv-2	0.0018715	0.215368	0.276	0.202	1
twin	0.0155939	0.214705	0.181	0.135	1
Spt6	0.0220438	0.214479	0.218	0.174	1
eIF4B	5.0131e-05	0.214352	0.362	0.253	0.520961
Tet	0.173556	0.21391	0.095	0.075	1
lgs	0.0655209	0.213681	0.206	0.175	1
CG10877	9.29586e-06	0.212989	0.309	0.195	0.0966026
E(Pc)	0.159936	0.21287	0.181	0.159	1
l(3)80Fj	0.00103954	0.212636	0.288	0.207	1
ci	0.0188782	0.212613	0.148	0.106	1
CG43736	0.109907	0.212411	0.313	0.292	1
LManII	4.2088e-06	0.212395	0.391	0.256	0.0437379
l(3)73Ah	0.0302151	0.211753	0.16	0.123	1
C1GalTA	0.00232404	0.211036	0.321	0.253	1
CtsB1	8.31252e-05	0.210945	0.741	0.702	0.863837
UQCR-11	0.00271686	0.210653	0.473	0.371	1
eIF4G1	2.41786e-06	0.21023	0.564	0.403	0.0251264
CG3262	0.251109	0.209838	0.251	0.241	1
HINT1	1.05757e-07	0.209711	0.584	0.387	0.00109903
CG4502	0.00132167	0.209709	0.16	0.102	1
Coq7	1.4443e-05	0.209395	0.148	0.075	0.150092
CG3638	0.0130171	0.209295	0.181	0.132	1
mtgo	0.00477237	0.208817	0.481	0.427	1
Gat	6.01112e-10	0.208676	0.099	0.03	6.24676e-06
Pde6	9.89904e-05	0.20866	0.074	0.031	1
DIP1	0.229435	0.2086	0.177	0.162	1
ERp60	5.26101e-07	0.208327	0.934	0.95	0.00546725
asRNA:CR44031	7.11281e-05	0.20814	0.16	0.088	0.739164
SERCA	0.000123665	0.207537	0.362	0.255	1
lncRNA:CR43334	0.0538135	0.207204	0.193	0.157	1
Tsp97E	0.0628185	0.207039	0.066	0.043	1
eIF3b	1.23536e-06	0.205217	0.514	0.352	0.0128378
MEP-1	6.42525e-06	0.20512	0.123	0.056	0.0667712
CG30015	0.000585237	0.20475	0.156	0.095	1
asRNA:CR45350	2.86148e-05	0.204678	0.218	0.126	0.297365
vir-1	4.88209e-08	0.204018	0.864	0.649	0.000507347
caps	5.57808e-10	0.203791	0.053	0.011	5.79674e-06
hpRNA:CR46342	0.000459645	0.202989	0.136	0.077	1
CG44243	2.17919e-05	0.202713	0.206	0.117	0.226461
CG4927	0.000506212	0.202455	0.387	0.291	1
Dsp1	0.324949	0.202162	0.313	0.31	1
Pgant6	0.000356754	0.201994	0.21	0.136	1
Inos	0.000130174	0.201654	0.757	0.673	1
CG16791	0.0424268	0.201614	0.066	0.041	1
Atg1	0.182886	0.201533	0.16	0.14	1
SREBP	1.35329e-06	0.201399	0.383	0.246	0.0140633
asRNA:CR43812	0.000166374	0.201204	0.095	0.045	1
Mnt	0.0666295	0.200643	0.193	0.161	1
GCS2beta	0.000741193	0.200261	0.531	0.45	1
Der-2	0.306541	0.200133	0.181	0.169	1
Moca-cyp	0.0546793	0.199958	0.173	0.139	1
Pvr	0.00130485	0.199872	0.444	0.364	1
wrd	0.00104806	0.199801	0.202	0.133	1
CCT5	7.24997e-08	0.199707	0.564	0.367	0.000753416
hts	0.514888	0.199706	0.169	0.165	1
eIF2gamma	5.07315e-05	0.199533	0.23	0.142	0.527202
FASN1	0.00235329	0.199427	0.329	0.259	1
CG5397	1.79105e-06	0.199323	0.728	0.568	0.0186125
Tgi	0.000421508	0.199263	0.3	0.217	1
Snx3	0.00193491	0.19901	0.568	0.516	1
gas	1.13481e-05	0.198843	0.169	0.089	0.11793
Fur1	0.326216	0.198073	0.111	0.097	1
Pur-alpha	0.0430508	0.198032	0.218	0.182	1
ScsbetaA	1.45969e-05	0.19759	0.37	0.248	0.151691
flw	0.00976887	0.19739	0.465	0.422	1
ctrip	0.0644796	0.19721	0.202	0.168	1
CG3402	0.0674704	0.197154	0.14	0.109	1
Src42A	0.0529899	0.196662	0.272	0.239	1
CG42322	0.000160348	0.194913	0.251	0.158	1
mfrn	0.000366675	0.194674	0.169	0.103	1
Ank	0.00555433	0.194623	0.42	0.362	1
O-fut1	0.000764762	0.19462	0.333	0.252	1
Mkp3	0.461669	0.194168	0.058	0.049	1
CG18135	0.000641811	0.194111	0.173	0.107	1
NimB2	0.00143116	0.194019	0.177	0.114	1
Karybeta3	0.00401387	0.193676	0.449	0.4	1
COX5A	4.26219e-06	0.192932	0.49	0.332	0.0442927
Faf2	9.74502e-06	0.192887	0.136	0.066	0.10127
nito	0.000698805	0.192801	0.173	0.11	1
Hml	5.38276e-06	0.192656	0.914	0.905	0.0559377
Syx6	3.77378e-05	0.192461	0.074	0.03	0.392171
Vha55	1.03121e-05	0.192148	0.671	0.578	0.107164
EMRE	0.394036	0.191963	0.144	0.134	1
lute	0.214156	0.191505	0.119	0.099	1
CG6236	0.00562102	0.191096	0.412	0.355	1
Hipk	3.11096e-05	0.190961	0.272	0.172	0.323291
eRF3	3.59136e-05	0.190512	0.358	0.244	0.373214
alphaCOP	0.0054492	0.190046	0.329	0.268	1
PIP5K59B	1.66893e-06	0.190041	0.07	0.023	0.0173435
Fmr1	0.0336009	0.190012	0.284	0.246	1
wcy	0.777407	0.189777	0.181	0.19	1
CG14435	0.104505	0.18977	0.132	0.104	1
Snx27	0.62185	0.18971	0.185	0.189	1
CCT1	9.41165e-05	0.189347	0.416	0.298	0.978058
CG42837	2.37094e-06	0.188637	0.152	0.072	0.0246388
Taf4	0.0117396	0.188506	0.284	0.234	1
Mpcp2	8.24303e-05	0.188387	0.609	0.462	0.856616
CG13603	0.000944177	0.188214	0.189	0.124	1
CG10413	8.46305e-05	0.188052	0.391	0.285	0.87948
CG45049	0.193152	0.188028	0.136	0.115	1
CG42724	0.403248	0.187909	0.255	0.257	1
CG18549	0.000385425	0.187628	0.189	0.118	1
asRNA:CR45926	0.0150363	0.187047	0.181	0.131	1
CG33199	5.16929e-08	0.187016	0.111	0.041	0.000537193
miple2	0.00082119	0.18691	0.148	0.088	1
CG7470	0.000317168	0.186437	0.107	0.055	1
Nlg4	0.00153892	0.186405	0.181	0.113	1
SLIRP1	3.17467e-05	0.186301	0.144	0.073	0.329911
CG10465	0.13182	0.185902	0.169	0.145	1
LpR2	3.32312e-06	0.185822	0.728	0.55	0.0345339
ATPsynG	9.16553e-06	0.185483	0.671	0.477	0.0952482
Apc2	4.32822e-06	0.185442	0.111	0.048	0.0449788
wdb	0.0797516	0.185214	0.383	0.353	1
Lztr1	0.0055712	0.185178	0.062	0.031	1
CG3198	0.493596	0.184547	0.189	0.184	1
Dh44-R2	4.11775e-05	0.184517	0.165	0.088	0.427917
CG42258	0.311046	0.184453	0.123	0.109	1
CG43658	0.00107904	0.18431	0.198	0.13	1
RhoGAPp190	0.99857	0.183795	0.123	0.131	1
Uggt	1.11417e-05	0.183656	0.284	0.173	0.115784
CG13895	0.0110829	0.183308	0.107	0.068	1
ClpP	0.00121271	0.182606	0.128	0.074	1
Dcr-2	0.00367127	0.182097	0.206	0.145	1
GlcAT-P	0.000423176	0.181331	0.502	0.427	1
CG12643	0.000532971	0.181277	0.259	0.18	1
Tmtc3	0.00310605	0.180751	0.115	0.069	1
Madm	0.0293161	0.180594	0.255	0.211	1
mRpL19	0.0892971	0.180301	0.185	0.157	1
Cds	6.20745e-05	0.179916	0.193	0.113	0.645078
Nipped-A	0.103963	0.179898	0.21	0.183	1
pyd	0.00150216	0.179325	0.189	0.122	1
Not1	0.00119887	0.179127	0.609	0.541	1
CG8080	0.141485	0.178898	0.226	0.202	1
Pdi	3.43257e-08	0.17887	0.926	0.952	0.000356713
Zcchc7	0.464825	0.178828	0.136	0.127	1
Gug	0.34921	0.178757	0.119	0.107	1
14-3-3zeta	0.923719	0.178657	0.971	0.925	1
alpha-Spec	0.00614502	0.178549	0.469	0.421	1
Pde9	0.0793839	0.178499	0.152	0.121	1
CG10803	0.0304722	0.178307	0.156	0.116	1
Atx2	0.0325241	0.177865	0.325	0.288	1
CG4045	0.000560396	0.177654	0.095	0.048	1
msi	0.046128	0.177266	0.416	0.384	1
bc10	0.335722	0.177172	0.119	0.106	1
hpRNA:CR18854	0.0973851	0.177048	0.095	0.07	1
fwe	0.672926	0.176984	0.255	0.266	1
lig	0.0478964	0.176928	0.399	0.375	1
Tektin-C	0.00423235	0.176781	0.082	0.045	1
CG12163	0.0278227	0.176312	0.35	0.314	1
CG9121	7.12373e-05	0.175974	0.103	0.048	0.740298
Mitofilin	0.328365	0.175882	0.255	0.248	1
alphaSnap	0.823711	0.175808	0.28	0.323	1
anne	0.805033	0.175774	0.177	0.185	1
Syx17	0.000160336	0.175181	0.066	0.027	1
kuz	0.00650042	0.174878	0.597	0.531	1
Cals	0.404357	0.174812	0.226	0.221	1
CG32803	0.00884115	0.174199	0.16	0.112	1
CG2991	0.0104314	0.173853	0.358	0.308	1
SNRPG	0.000189686	0.17363	0.403	0.283	1
Galphaq	0.0140444	0.172857	0.412	0.37	1
Usp47	0.000253539	0.172723	0.169	0.099	1
chinmo	0.0132963	0.172434	0.724	0.651	1
Gss2	1.87169e-05	0.17234	0.198	0.108	0.194506
Gss1	1.87169e-05	0.17234	0.198	0.108	0.194506
CG4266	0.0180639	0.172325	0.156	0.114	1
CG5888	0.000330298	0.172066	0.309	0.221	1
Rbf	0.0279717	0.17201	0.276	0.232	1
CG3618	0.00372321	0.171968	0.123	0.076	1
Pfdn2	0.000194436	0.171943	0.317	0.218	1
CG3902	0.052244	0.171796	0.37	0.341	1
CG3164	0.0111037	0.171764	0.395	0.334	1
cass	0.014019	0.171572	0.185	0.135	1
Amun	0.17736	0.171457	0.329	0.321	1
scrib	0.290857	0.171336	0.123	0.107	1
CG18815	0.716348	0.171118	0.173	0.178	1
Phm	0.00119399	0.170914	0.44	0.374	1
psq	0.163914	0.170744	0.309	0.292	1
kst	0.0170408	0.170642	0.593	0.548	1
Tomosyn	0.829736	0.170375	0.099	0.109	1
px	0.050794	0.170332	0.169	0.133	1
milt	0.00204639	0.170321	0.136	0.083	1
Nuak1	0.00616091	0.170279	0.177	0.123	1
prtp	0.000411535	0.170227	0.556	0.476	1
Larp4B	0.103214	0.170157	0.272	0.246	1
CG32638	0.0115791	0.169523	0.288	0.233	1
ATP6AP2	9.35225e-06	0.169514	0.432	0.291	0.0971885
CG31673	0.00317267	0.168946	0.358	0.284	1
Pgant9	0.00259844	0.16893	0.486	0.402	1
rdgA	0.00819195	0.168637	0.111	0.068	1
CG10365	0.0046527	0.168516	0.128	0.081	1
KrT95D	0.194171	0.168261	0.095	0.076	1
l(3)05822	0.0265046	0.168208	0.362	0.317	1
ND-23	0.0529518	0.168116	0.177	0.14	1
alc	0.00205651	0.168012	0.465	0.386	1
asRNA:CR46104	0.0032321	0.167619	0.202	0.135	1
lncRNA:CR45660	0.00915273	0.167472	0.189	0.136	1
Sr-CI	1.01831e-05	0.167297	0.897	0.755	0.105823
Trxr-1	0.000573563	0.166989	0.51	0.436	1
eIF3i	5.53418e-05	0.166951	0.481	0.346	0.575112
Ahcy	0.000388451	0.166869	0.296	0.202	1
Ubc10	0.0864952	0.166181	0.239	0.208	1
AspRS-m	0.172724	0.16609	0.099	0.078	1
mmy	0.00742156	0.165739	0.461	0.401	1
P58IPK	0.0233489	0.165249	0.267	0.223	1
CG18766	0.0114292	0.165131	0.091	0.055	1
CG42663	0.121544	0.16508	0.091	0.068	1
CG14969	0.0220311	0.164507	0.173	0.13	1
nej	0.695023	0.164331	0.267	0.283	1
CG9636	0.0484039	0.164252	0.148	0.112	1
beta'COP	0.159799	0.163965	0.3	0.286	1
CG9132	0.0872124	0.163902	0.156	0.127	1
Lk6	0.00637235	0.163536	0.654	0.601	1
Eph	0.880372	0.163415	0.119	0.131	1
Dip-B	0.150309	0.163412	0.486	0.488	1
Nup214	0.058969	0.163288	0.107	0.078	1
sina	0.667294	0.162998	0.16	0.162	1
IntS11	0.0323719	0.162991	0.165	0.125	1
pan	0.295997	0.162989	0.214	0.203	1
VhaSFD	0.00755251	0.162688	0.473	0.413	1
Gga	0.019859	0.162604	0.091	0.058	1
Chchd3	0.0036013	0.162471	0.181	0.123	1
mld	0.00119136	0.162182	0.111	0.062	1
Tsp42Ee	1.54961e-05	0.161501	0.786	0.635	0.161035
Lst8	0.0590798	0.16092	0.152	0.12	1
dom	0.0346861	0.160582	0.342	0.301	1
AspRS	0.0178298	0.160432	0.181	0.133	1
trr	0.00713901	0.160199	0.115	0.072	1
Cka	0.0307152	0.160187	0.189	0.148	1
EndoB	0.290535	0.16015	0.082	0.068	1
cora	0.000476274	0.160042	0.613	0.525	1
lncRNA:CR45625	0.00145349	0.160001	0.119	0.069	1
CG3634	0.000283816	0.159973	0.103	0.051	1
Rbpn-5	0.00441483	0.159937	0.107	0.064	1
stg	0.000410964	0.159826	0.514	0.398	1
CG5191	0.000906058	0.159815	0.115	0.064	1
JHDM2	0.00622206	0.159803	0.111	0.068	1
Hsp68	7.08583e-06	0.159797	0.35	0.217	0.0736359
Vps25	0.0329545	0.159726	0.259	0.221	1
CG8001	0.00423731	0.159715	0.107	0.063	1
Myo61F	0.000694006	0.159672	0.621	0.549	1
Cpsf5	0.0424791	0.159641	0.169	0.133	1
CG14442	0.841123	0.15955	0.103	0.104	1
spoon	0.103341	0.159516	0.412	0.401	1
tra2	0.271797	0.158353	0.107	0.092	1
ND-75	0.00262314	0.158099	0.235	0.165	1
Aldh-III	0.0702201	0.157767	0.387	0.369	1
aay	2.71076e-05	0.157726	0.103	0.046	0.281702
Ubi-p63E	0.000888103	0.15759	0.481	0.403	1
gro	0.0695392	0.157382	0.255	0.221	1
CG32486	0.160917	0.157146	0.156	0.133	1
cert	0.269317	0.157064	0.305	0.297	1
CG44085	0.000774844	0.157025	0.132	0.076	1
porin	3.33942e-05	0.156943	0.897	0.833	0.347033
CG15514	0.201842	0.156897	0.099	0.08	1
Ir40a	0.00506199	0.156799	0.14	0.089	1
SCCRO	0.309216	0.156659	0.123	0.11	1
Stip1	0.010712	0.156316	0.263	0.199	1
Cyp9f3	5.80184e-05	0.156051	0.152	0.081	0.602927
Drp1	0.449398	0.155833	0.169	0.162	1
CanB2	0.0964948	0.155449	0.28	0.251	1
Kank	0.192952	0.1553	0.091	0.071	1
RNaseZ	0.000211384	0.155228	0.086	0.04	1
CG34331	0.000507004	0.155045	0.84	0.717	1
Tudor-SN	0.01105	0.154933	0.621	0.588	1
rumi	0.119439	0.15476	0.111	0.087	1
asRNA:CR43916	0.000203551	0.154644	0.111	0.056	1
CG17528	0.348929	0.154347	0.14	0.127	1
Sema2a	0.000452408	0.154017	0.115	0.061	1
Vps13	0.0372777	0.153779	0.23	0.186	1
CG12099	0.0614896	0.153579	0.177	0.143	1
pnt	0.00840172	0.15339	0.551	0.482	1
CG30046	0.00523586	0.153379	0.292	0.229	1
tou	0.470122	0.153331	0.136	0.128	1
AOX3	0.00020525	0.153237	0.128	0.068	1
pum	0.00116277	0.153124	0.823	0.809	1
AlaRS	0.0393198	0.153107	0.202	0.156	1
Nmt	0.0940219	0.153003	0.226	0.198	1
Asator	0.0794217	0.152889	0.099	0.072	1
CG11158	0.010041	0.152724	0.078	0.045	1
Tnpo-SR	0.000155005	0.152699	0.074	0.032	1
sxc	0.333986	0.152259	0.313	0.306	1
CG31635	0.072943	0.151908	0.119	0.09	1
Usp2	0.127314	0.15144	0.255	0.232	1
Tsp96F	0.41628	0.151434	0.095	0.083	1
fl(2)d	0.450781	0.151171	0.128	0.118	1
Sec61alpha	0.00790598	0.151063	0.695	0.69	1
Mob4	0.0579198	0.151013	0.181	0.146	1
CG1371	0.0284862	0.150979	0.296	0.251	1
ItgaPS5	0.0027981	0.150853	0.23	0.16	1
CG14478	0.324205	0.150684	0.21	0.201	1
ref(2)P	0.0296084	0.150509	0.251	0.206	1
dpp	0.0012785	0.150389	0.119	0.068	1
AsnRS	0.000545964	0.150168	0.276	0.188	1
rtet	0.0657092	0.150165	0.169	0.135	1
mRpL2	1.11391e-06	-0.150463	0.033	0.146	0.0115757
sip2	0.00101504	-0.150576	0.045	0.114	1
CG4594	0.000118706	-0.15058	0.049	0.137	1
CG1416	0.0170421	-0.150626	0.374	0.466	1
CG5535	0.000193472	-0.150823	0.029	0.103	1
nudC	0.000604959	-0.151379	0.189	0.307	1
RpS17	8.8933e-07	-0.151573	0.979	0.982	0.00924192
RpL5	1.17181e-06	-0.152158	0.984	0.979	0.0121774
CG8891	0.00070294	-0.152332	0.181	0.294	1
TSG101	0.000423196	-0.152477	0.107	0.207	1
opm	0.000623711	-0.152829	0.111	0.21	1
Dyak-Scsalpha	0.00183309	-0.152899	0.16	0.258	1
CG6937	0.000270937	-0.152935	0.082	0.178	1
CG14434	0.00211685	-0.153396	0.095	0.174	1
MCTS1	0.000171856	-0.153623	0.078	0.179	1
Gmap	0.000304305	-0.153824	0.128	0.232	1
Myd88	0.00171558	-0.153875	0.115	0.204	1
CG13096	0.000452322	-0.153888	0.156	0.272	1
Cyp4e2	0.015912	-0.153978	0.214	0.295	1
SmD2	0.00289959	-0.15399	0.325	0.441	1
Su(Tpl)	0.00342688	-0.154057	0.23	0.337	1
CG3436	0.000279717	-0.154084	0.049	0.131	1
Khc	0.00766748	-0.154227	0.23	0.326	1
mRpL21	4.99012e-05	-0.154297	0.062	0.163	0.518573
CDC50	0.0016121	-0.154345	0.259	0.383	1
Dera	0.0008718	-0.154428	0.037	0.103	1
Tim8	0.00253208	-0.154677	0.239	0.353	1
mt:CoIII	0.000140825	-0.154967	0.926	0.932	1
CG31460	0.000578049	-0.154968	0.103	0.199	1
mRpS18A	0.000104913	-0.155056	0.041	0.127	1
eRF1	0.00152264	-0.155248	0.226	0.339	1
CG42455	5.00773e-06	-0.155657	0.091	0.218	0.0520403
CG10103	0.000954856	-0.155744	0.132	0.233	1
CG15717	0.00191257	-0.155974	0.165	0.266	1
Glut4EF	0.0107765	-0.156029	0.14	0.213	1
Cys	0.102325	-0.15604	0.461	0.506	1
CG17544	0.00967503	-0.156185	0.226	0.315	1
Cyp6a17	0.000803791	-0.156281	0.029	0.092	1
l(2)09851	0.00084243	-0.156547	0.074	0.156	1
Pmm2	0.000419085	-0.156566	0.115	0.219	1
Ns1	0.00137038	-0.156779	0.086	0.167	1
CG4866	6.61126e-05	-0.156847	0.049	0.142	0.687042
mRpS33	8.72195e-05	-0.157098	0.07	0.171	0.906385
CG8549	0.000346995	-0.157223	0.045	0.123	1
Mo25	0.00579568	-0.157238	0.202	0.294	1
Mapmodulin	0.0176966	-0.157255	0.432	0.506	1
mRpS10	0.000272638	-0.157584	0.062	0.149	1
CG9253	0.0034124	-0.157792	0.136	0.222	1
CG13364	0.00249288	-0.158317	0.387	0.492	1
Rbp1	0.0275131	-0.158487	0.403	0.487	1
CG7006	8.19108e-05	-0.158525	0.041	0.128	0.851217
Spase12	0.00740281	-0.158844	0.346	0.452	1
Rpb12	0.00374865	-0.159693	0.247	0.351	1
Bet1	0.000188586	-0.160129	0.103	0.208	1
Rpt5	0.00151885	-0.160495	0.173	0.279	1
BCAS2	8.68213e-05	-0.161064	0.025	0.102	0.902247
Nedd8	0.000965332	-0.161288	0.267	0.398	1
baf	0.000738146	-0.161386	0.362	0.495	1
RpL24	1.48846e-05	-0.161443	0.984	0.981	0.15468
Keap1	0.000145525	-0.161458	0.029	0.105	1
Archease	0.00032793	-0.161682	0.07	0.159	1
tko	6.24188e-05	-0.161792	0.095	0.209	0.648657
Nmdmc	0.00184236	-0.162211	0.115	0.202	1
CenG1A	0.000126589	-0.162388	0.004	0.065	1
Hmu	0.0351426	-0.162576	0.193	0.258	1
Aef1	7.78971e-05	-0.162969	0.029	0.111	0.809506
mt:CoI	3.88524e-06	-0.163275	0.979	0.983	0.0403754
Atg8a	0.00191846	-0.163374	0.465	0.556	1
mys	0.43545	-0.163758	0.461	0.475	1
CG2076	9.18267e-05	-0.164185	0.115	0.232	0.954263
alphaTub84B	0.0216336	-0.164324	0.951	0.921	1
CG30187	0.000234428	-0.164761	0.066	0.155	1
Vps20	0.000170107	-0.165132	0.119	0.232	1
CG9932	0.139973	-0.165604	0.292	0.335	1
how	0.003035	-0.167437	0.177	0.272	1
CG17508	3.07766e-05	-0.167496	0.095	0.212	0.31983
Prosalpha6	0.00287772	-0.167655	0.288	0.397	1
CG5044	0.000410788	-0.167687	0.115	0.216	1
Cyp1	1.85371e-07	-0.167924	0.992	0.985	0.00192637
Nhe3	8.73208e-05	-0.168633	0.053	0.146	0.907438
bin3	0.00475726	-0.168696	0.218	0.317	1
thoc7	1.45419e-05	-0.168897	0.033	0.129	0.15112
Ttc19	0.0231679	-0.169096	0.066	0.112	1
CG3566	0.000677797	-0.169706	0.222	0.349	1
mRpL23	1.84893e-05	-0.169792	0.062	0.172	0.192141
LSm1	0.0001452	-0.169911	0.041	0.123	1
CG6180	0.000276969	-0.170184	0.198	0.321	1
Phb2	0.00139811	-0.170324	0.243	0.354	1
Best1	0.000929092	-0.170393	0.078	0.16	1
Pvf2	0.00410845	-0.170785	0.041	0.096	1
CG3408	0.00129335	-0.171424	0.095	0.179	1
Nipped-B	0.00207835	-0.171624	0.23	0.339	1
mRpL49	0.00010977	-0.171948	0.07	0.167	1
RpL40	2.11987e-06	-0.172136	0.988	0.972	0.0220297
CG3008	0.000289759	-0.172154	0.033	0.106	1
CG5861	3.56247e-05	-0.172652	0.119	0.247	0.370212
Prosbeta2	0.00372429	-0.172731	0.313	0.427	1
Rpn3	0.00740843	-0.17289	0.202	0.291	1
GstE7	0.000628411	-0.173242	0.025	0.087	1
LSm3	0.000938336	-0.173309	0.148	0.253	1
CG40228	0.000133608	-0.173408	0.21	0.348	1
Nxt1	0.00349829	-0.173469	0.152	0.24	1
Nlp	0.00868318	-0.173501	0.626	0.699	1
Cyt-c1	0.000234376	-0.173967	0.296	0.428	1
CG5590	0.000857359	-0.174094	0.107	0.199	1
CG12007	9.57037e-05	-0.174455	0.045	0.133	0.994552
spin	0.00135267	-0.174514	0.255	0.368	1
Rpb11	0.000126039	-0.174765	0.095	0.199	1
CG13117	0.0917691	-0.174801	0.584	0.624	1
Xrp1	0.00263569	-0.174886	0.638	0.702	1
Graf	0.000219161	-0.174937	0.156	0.279	1
Dhpr	6.18138e-05	-0.175021	0.078	0.185	0.642369
Pak3	0.00542205	-0.175026	0.346	0.443	1
shn	0.000422438	-0.175518	0.082	0.174	1
su(Hw)	0.00122555	-0.175701	0.095	0.178	1
ND-18	6.76661e-05	-0.175954	0.165	0.301	0.703186
Rpt2	0.00182624	-0.176887	0.23	0.342	1
Lst	0.00234015	-0.1772	0.008	0.051	1
TfIIA-S	0.000201041	-0.177674	0.123	0.234	1
Pgam5	0.000505673	-0.177831	0.074	0.159	1
CG34423	0.000639599	-0.177858	0.095	0.187	1
CG44008	1.26961e-05	-0.177981	0	0.073	0.131938
CG8209	2.7758e-05	-0.178082	0.099	0.221	0.288461
CCT4	0.00273076	-0.17873	0.428	0.546	1
drongo	0.00100897	-0.17934	0.132	0.228	1
Catsup	0.0244025	-0.179899	0.366	0.448	1
CG7800	5.75493e-05	-0.17991	0.025	0.105	0.598052
RhoGAP16F	0.0115423	-0.180838	0.28	0.369	1
RpS25	6.73009e-12	-0.180844	0.996	0.997	6.99391e-08
RpL10	8.11512e-10	-0.180851	0.984	0.994	8.43324e-06
GstO2	0.000720918	-0.180876	0.16	0.271	1
28SrRNA-Psi:CR40741	0.881	-0.18118	0.156	0.158	1
CG42674	0.00100402	-0.18135	0.156	0.26	1
CG6712	1.37379e-05	-0.181412	0.025	0.116	0.142764
SpdS	0.000355984	-0.181722	0.091	0.184	1
CG8635	0.00198718	-0.182405	0.198	0.299	1
Tim17b	0.00132879	-0.182671	0.49	0.578	1
ND-20	9.08193e-05	-0.183066	0.218	0.36	0.943794
CG43179	7.56205e-05	-0.183172	0	0.061	0.785849
RpS29	1.2467e-06	-0.183198	0.984	0.983	0.0129557
Tif-IA	3.34187e-05	-0.183556	0.074	0.182	0.347287
CG16710	0.000129977	-0.183673	0	0.057	1
CG6299	0.000193774	-0.183821	0.041	0.121	1
RpL26	4.24209e-08	-0.183922	0.979	0.988	0.000440838
CG32409	0.000523208	-0.183949	0.062	0.142	1
Rrp47	2.03308e-05	-0.184845	0.062	0.169	0.211278
asRNA:CR46093	0.0015257	-0.184933	0.008	0.055	1
SmE	0.000549081	-0.185578	0.284	0.412	1
CG9246	6.28434e-05	-0.185857	0.037	0.123	0.653068
glu	0.000426202	-0.186187	0.07	0.156	1
CG30269	3.29863e-05	-0.186292	0.012	0.089	0.342793
Nop60B	0.000225485	-0.186777	0.305	0.438	1
CG9396	0.000772443	-0.187156	0.062	0.138	1
dpr17	2.87491e-05	-0.187428	0.025	0.112	0.298761
CG9743	0.00423954	-0.188989	0.23	0.327	1
CG11555	2.56084e-05	-0.18909	0.025	0.111	0.266122
CG31174	0.000371013	-0.189172	0.004	0.057	1
robl	0.000237633	-0.189612	0.222	0.352	1
lncRNA:CR43900	2.737e-05	-0.189845	0.012	0.09	0.284429
mbf1	0.000700497	-0.18997	0.292	0.424	1
Txl	0.000130815	-0.190437	0.152	0.272	1
Nc73EF	0.000393408	-0.19051	0.119	0.223	1
ghi	0.00116473	-0.190545	0.206	0.317	1
RpS27A	6.59239e-10	-0.190689	0.992	0.994	6.85081e-06
RpL10Ab	1.7306e-08	-0.191004	0.971	0.989	0.000179844
SerRS	0.00038892	-0.191005	0.23	0.356	1
Ufm1	0.000275779	-0.191084	0.218	0.349	1
RpS24	1.32026e-07	-0.191195	0.971	0.98	0.00137201
Gnf1	0.000271923	-0.192092	0.053	0.136	1
SF2	0.00129342	-0.192404	0.412	0.523	1
CG8177	0.00290454	-0.192562	0.243	0.348	1
pst	0.00114761	-0.192651	0.218	0.334	1
CG11858	0.00015387	-0.192761	0.156	0.28	1
Prosalpha3	0.000406751	-0.193594	0.387	0.518	1
Xbp1	0.00146459	-0.193619	0.506	0.597	1
RpL38	4.96606e-14	-0.193826	0.992	0.995	5.16073e-10
Prosalpha5	0.000392921	-0.194183	0.395	0.519	1
RpS11	4.16392e-07	-0.194254	0.984	0.987	0.00432715
CG7637	0.000111949	-0.194606	0.181	0.315	1
CG11357	0.00118419	-0.195385	0.3	0.416	1
Act42A	0.000122299	-0.195458	0.942	0.984	1
levy	1.68957e-05	-0.195869	0.605	0.708	0.17558
cnc	0.00277276	-0.196354	0.313	0.424	1
zetaCOP	0.000301041	-0.196626	0.235	0.364	1
Nedd4	0.000108327	-0.196792	0.119	0.234	1
RpL13A	3.19535e-07	-0.196945	0.988	0.988	0.00332061
RpS21	1.84956e-07	-0.198405	0.951	0.959	0.00192207
PGRP-LF	0.000318996	-0.198427	0.091	0.186	1
boca	0.000541306	-0.199044	0.169	0.28	1
Cdk1	5.45793e-05	-0.199711	0.082	0.19	0.567188
Prosalpha2	0.000348613	-0.200092	0.329	0.46	1
PDCD-5	0.000219138	-0.200614	0.14	0.251	1
CG3226	3.14088e-05	-0.201158	0.107	0.229	0.3264
eIF3k	0.000598292	-0.201222	0.432	0.53	1
SmF	3.13633e-05	-0.201501	0.193	0.341	0.325928
ND-MNLL	0.000600638	-0.20184	0.189	0.298	1
mRpL36	1.10198e-06	-0.202831	0.066	0.196	0.0114518
CG18178	0.000215902	-0.202839	0.07	0.16	1
ND-B14.7	9.16844e-06	-0.202983	0.128	0.267	0.0952784
RpL31	3.39346e-07	-0.203678	0.975	0.963	0.00352648
myo	0.000227279	-0.20389	0.115	0.22	1
CG11791	0.00524959	-0.204533	0.251	0.34	1
RpS13	6.69879e-08	-0.204967	0.979	0.975	0.000696139
Cndp2	0.00746146	-0.205182	0.523	0.607	1
SmB	0.000264094	-0.205844	0.235	0.367	1
Roc1a	0.00102648	-0.206633	0.296	0.411	1
CG9034	8.98134e-05	-0.207063	0.313	0.464	0.933341
CCT2	0.00361729	-0.207221	0.527	0.597	1
RpLP0-like	0.000344991	-0.20726	0.173	0.29	1
dUTPase	0.00142158	-0.207663	0.321	0.437	1
Tim10	3.44549e-05	-0.209342	0.107	0.228	0.358056
bif	0.00252726	-0.210622	0.366	0.47	1
wnd	6.25817e-05	-0.211635	0.066	0.165	0.650349
eIF6	3.54913e-05	-0.21169	0.103	0.223	0.368825
CG4806	4.14607e-05	-0.212386	0.066	0.168	0.43086
28SrRNA-Psi:CR45848	0.885765	-0.213128	0.144	0.145	1
P32	0.000703764	-0.213144	0.214	0.327	1
CG43125	0.00179156	-0.214334	0.193	0.294	1
cup	3.02422e-06	-0.214609	0.037	0.146	0.0314277
CG33462	5.41098e-06	-0.215341	0	0.079	0.0562309
sel	0.0067364	-0.215729	0.3	0.389	1
CG1943	0.00229622	-0.217292	0.523	0.597	1
Moe	6.51718e-07	-0.218217	0.955	0.962	0.00677265
uex	0.000393771	-0.218548	0.288	0.415	1
CG10863	0.00260414	-0.218558	0.309	0.41	1
ND-15	0.000222066	-0.219403	0.296	0.426	1
CG10418	1.64157e-05	-0.219528	0.074	0.188	0.170592
Acn	1.0252e-05	-0.219753	0.115	0.249	0.106539
CG11180	1.00957e-05	-0.220205	0.045	0.149	0.104915
PGRP-LB	0.000221926	-0.220758	0.016	0.082	1
CG31431	0.00012965	-0.221588	0.119	0.231	1
ATPsynC	5.26626e-06	-0.221805	0.979	0.931	0.054727
capu	0.00030018	-0.221906	0.132	0.236	1
Nop56	0.000884531	-0.222094	0.288	0.403	1
lncRNA:roX2	0.000202085	-0.222898	0.078	0.171	1
CG18659	4.82047e-06	-0.22296	0.062	0.18	0.0500943
CG42542	3.08803e-05	-0.223424	0.123	0.248	0.320908
CG42846	2.79824e-05	-0.223689	0.029	0.117	0.290793
28SrRNA-Psi:CR45851	0.0472233	-0.224483	0.399	0.301	1
RpL34a	0.000268087	-0.224528	0.737	0.748	1
CG5828	0.00236363	-0.225086	0.012	0.058	1
RpL37A	2.4202e-13	-0.225214	0.984	0.992	2.51507e-09
Clic	0.000214182	-0.225224	0.481	0.616	1
GstD7	0.000196695	-0.225296	0.053	0.138	1
CG13630	2.00298e-06	-0.225409	0.033	0.142	0.0208149
Aprt	8.74518e-07	-0.22581	0.008	0.106	0.00908799
CG30148	7.59073e-05	-0.226612	0.012	0.082	0.788829
spir	6.88826e-05	-0.2277	0.021	0.097	0.715828
CkIIalpha	0.000378607	-0.22781	0.288	0.406	1
CG3224	0.000103755	-0.227822	0.099	0.203	1
ham	0.000636808	-0.228071	0.148	0.247	1
CG4511	7.34334e-05	-0.228681	0.177	0.309	0.76312
CG42668	3.19192e-05	-0.229554	0.136	0.265	0.331704
olf186-F	5.85041e-06	-0.229847	0.074	0.197	0.0607975
CG3376	0.000574511	-0.231895	0.169	0.273	1
PGRP-SA	1.7742e-05	-0.233078	0.012	0.093	0.184375
CG42232	9.33244e-06	-0.233431	0.115	0.245	0.0969827
Nrt	1.2015e-05	-0.233719	0.041	0.142	0.12486
Spn42Da	2.09472e-05	-0.235444	0.062	0.166	0.217683
bai	0.000148168	-0.237046	0.436	0.56	1
msd1	8.72049e-06	-0.237319	0.041	0.143	0.0906233
CG10376	1.30358e-06	-0.237819	0.07	0.203	0.0135468
RpII18	1.68823e-06	-0.239009	0.185	0.35	0.0175441
PRL-1	0.000138761	-0.239114	0.226	0.342	1
janA	4.46063e-06	-0.241	0.189	0.349	0.0463548
RpS6	6.78785e-07	-0.241328	0.975	0.964	0.00705393
CG8320	5.04217e-07	-0.241801	0.062	0.197	0.00523983
Ostgamma	0.000332741	-0.241837	0.374	0.497	1
hoip	0.000891256	-0.243147	0.288	0.395	1
CG4858	3.12474e-06	-0.245362	0.037	0.144	0.0324723
Spn88Eb	0.0007437	-0.24599	0.206	0.307	1
eIF5B	7.92021e-05	-0.246094	0.243	0.378	0.823068
rgn	5.43467e-05	-0.246551	0.049	0.143	0.564771
Manf	0.000588564	-0.247657	0.436	0.533	1
CG8545	3.87729e-05	-0.248598	0.099	0.211	0.402928
Sem1	1.23193e-05	-0.248636	0.366	0.524	0.128023
nop5	2.32163e-05	-0.2497	0.222	0.366	0.241264
CG30120	4.35796e-06	-0.249747	0.037	0.141	0.0452879
mt:ATPase6	8.2844e-07	-0.250865	0.868	0.889	0.00860915
CG8112	1.80614e-06	-0.251245	0.041	0.155	0.0187694
Rpn12	7.60023e-05	-0.251864	0.239	0.371	0.789816
CG6724	7.22935e-07	-0.252016	0.012	0.114	0.00751274
rost	0.000121449	-0.252569	0.111	0.217	1
NijA	0.00046301	-0.25272	0.082	0.168	1
eIF1	2.54388e-06	-0.252845	0.621	0.707	0.026436
Fit1	0.000247777	-0.253119	0.144	0.255	1
viaf	9.28043e-06	-0.253886	0.169	0.314	0.0964422
RpL29	1.05399e-10	-0.254485	0.93	0.953	1.0953e-06
Adgf-A	0.00392181	-0.254816	0.309	0.397	1
28SrRNA-Psi:CR45855	0.000137987	-0.255295	0.066	0.159	1
CG6084	1.26031e-05	-0.256538	0.691	0.767	0.130972
RhoL	0.000171876	-0.257911	0.206	0.328	1
ATPsynF	9.42677e-07	-0.259857	0.58	0.676	0.0097963
CG13868	5.07594e-05	-0.261602	0.152	0.275	0.527492
CG7860	0.533535	-0.261603	0.049	0.059	1
CG10527	0.000931561	-0.261843	0.444	0.525	1
CG12112	0.000126317	-0.262028	0.111	0.216	1
Prosbeta4	5.95411e-05	-0.262998	0.42	0.551	0.618751
Sodh-2	0.000876176	-0.263425	0.193	0.296	1
28SrRNA-Psi:CR45860	0.268516	-0.26368	0.103	0.123	1
sra	6.47205e-07	-0.264901	0.058	0.188	0.00672575
Chchd2	0.000161813	-0.265303	0.498	0.591	1
Rs1	2.12052e-06	-0.265995	0.074	0.202	0.0220365
tsu	1.34634e-05	-0.266251	0.198	0.344	0.139912
CG2065	1.64605e-05	-0.266267	0.021	0.107	0.171058
cl	0.00495418	-0.26738	0.502	0.554	1
Alh	5.19538e-06	-0.267601	0.066	0.182	0.0539904
lost	1.24269e-06	-0.267624	0.7	0.76	0.0129141
RpS4	1.39898e-09	-0.269173	0.975	0.971	1.45382e-05
CG5850	0.000123536	-0.269274	0.272	0.393	1
Ssrp	8.97014e-05	-0.269603	0.21	0.338	0.932177
Nurf-38	0.000154969	-0.269777	0.329	0.458	1
Chmp1	7.83585e-05	-0.270728	0.259	0.392	0.814301
NK7.1	1.20367e-05	-0.271316	0.029	0.121	0.125085
h	0.00306786	-0.27153	0.251	0.342	1
kra	3.90542e-05	-0.271941	0.539	0.653	0.405851
Eip55E	0.000202521	-0.274297	0.267	0.393	1
RpS20	5.48899e-11	-0.275771	0.984	0.985	5.70416e-07
UQCR-14	3.19352e-06	-0.275815	0.391	0.535	0.0331871
pre-rRNA:CR45856	4.5522e-05	-0.277069	0.494	0.326	0.473064
28SrRNA:CR45844	0.0120234	-0.277458	0.436	0.31	1
Uhg3	5.92301e-08	-0.278353	0.008	0.123	0.000615519
RpL32	5.5025e-10	-0.278508	0.988	0.955	5.7182e-06
CG5346	0.000103141	-0.280308	0.14	0.252	1
RpL21	2.56355e-13	-0.280388	0.996	0.987	2.66404e-09
CG2003	2.00199e-07	-0.281407	0.074	0.222	0.00208047
CG11267	2.84263e-05	-0.281441	0.556	0.636	0.295406
Rab1	7.47947e-05	-0.284117	0.481	0.587	0.777267
crc	2.15013e-06	-0.284916	0.387	0.517	0.0223441
RpL27A	5.4428e-15	-0.285437	0.992	0.988	5.65615e-11
Su(var)205	3.31901e-05	-0.287603	0.333	0.466	0.344911
CG6126	9.81267e-07	-0.287744	0.074	0.207	0.0101973
CG43175	0.319934	-0.288397	0.226	0.251	1
Syb	3.44829e-05	-0.289746	0.646	0.71	0.358346
Lip4	3.18368e-06	-0.290558	0.004	0.09	0.0330848
CG4250	1.21326e-05	-0.29101	0.724	0.793	0.126081
CG12133	5.44025e-05	-0.293932	0.004	0.071	0.565351
Men	0.805934	-0.294617	0.453	0.484	1
jtb	2.1202e-08	-0.297126	0.004	0.123	0.000220331
CAP	5.4821e-08	-0.298228	0.012	0.133	0.0005697
Prosalpha4	1.3757e-06	-0.298638	0.247	0.422	0.0142963
eEF1delta	5.23635e-06	-0.299287	0.477	0.617	0.0544162
RpL6	1.12178e-14	-0.301795	0.975	0.977	1.16575e-10
mnd	7.88808e-05	-0.302338	0.202	0.323	0.819729
lncRNA:CR45018	2.27663e-05	-0.302625	0.354	0.499	0.236588
RpLP1	4.63947e-14	-0.305776	0.992	0.991	4.82134e-10
Gip	0.00251279	-0.311692	0.119	0.202	1
CG16713	0.00031916	-0.312087	0	0.051	1
CG34054	4.3528e-05	-0.312551	0.095	0.202	0.452343
NimB1	4.66279e-05	-0.312589	0.193	0.317	0.484557
loco	4.72971e-05	-0.313196	0.173	0.292	0.491511
Arf102F	1.68326e-05	-0.315345	0.374	0.508	0.174925
klar	1.47471e-08	-0.315993	0.152	0.341	0.000153252
CNBP	1.54516e-06	-0.316392	0.922	0.905	0.0160573
RpS10b	2.84014e-12	-0.317627	0.975	0.978	2.95147e-08
CG15611	5.10497e-07	-0.318976	0.074	0.208	0.00530509
Spn55B	6.08456e-07	-0.319383	0.062	0.19	0.00632307
RpS14b	5.41999e-08	-0.319537	0.63	0.722	0.000563245
gem	2.2033e-06	-0.319908	0.111	0.248	0.0228967
CG11686	9.24181e-06	-0.320853	0.14	0.272	0.0960409
La	3.24241e-07	-0.322234	0.181	0.348	0.00336951
sle	7.18517e-06	-0.322519	0.193	0.339	0.0746683
Prosbeta1	1.5399e-06	-0.324381	0.288	0.447	0.0160027
CG18747	2.94187e-07	-0.324473	0.041	0.165	0.00305719
Adk2	2.98492e-06	-0.325352	0.391	0.515	0.0310193
Naxd	1.57969e-06	-0.325762	0.07	0.199	0.0164161
meigo	2.03284e-08	-0.325769	0.041	0.185	0.000211252
smt3	7.883e-09	-0.326216	0.802	0.824	8.19201e-05
Glo1	2.22955e-06	-0.329536	0.329	0.486	0.0231695
hebe	1.72474e-07	-0.330101	0	0.102	0.00179235
mago	4.51571e-08	-0.330187	0.119	0.288	0.000469272
CG6023	0.000144377	-0.334542	0	0.056	1
RhoGAP18B	1.49683e-06	-0.334927	0.115	0.255	0.015555
NUCB1	2.0514e-07	-0.337584	0.519	0.658	0.00213182
Arpc3B	2.99559e-07	-0.337786	0.23	0.402	0.00311302
IP3K1	8.58741e-05	-0.337825	0.111	0.216	0.892404
Yeti	1.06306e-06	-0.338061	0.321	0.485	0.0110473
Pomp	3.97684e-07	-0.338966	0.337	0.497	0.00413273
RpL14	1.73667e-11	-0.341922	0.975	0.977	1.80474e-07
RpL30	4.00582e-12	-0.343535	0.938	0.931	4.16285e-08
NHP2	6.45205e-07	-0.34556	0.152	0.308	0.00670497
CG43236	0.00191416	-0.346234	0.226	0.319	1
CG6006	3.79619e-05	-0.346554	0.062	0.159	0.3945
PPO3	0.0263418	-0.348479	0.021	0.052	1
28SrRNA-Psi:CR45859	0.0010651	-0.349334	0.23	0.339	1
RpL36	2.23943e-12	-0.35033	0.967	0.962	2.32721e-08
RpL13	6.16458e-14	-0.352006	0.971	0.966	6.40623e-10
CHMP2B	6.027e-09	-0.353081	0.041	0.191	6.26326e-05
CG33459	2.0953e-07	-0.354441	0.066	0.203	0.00217744
Ac78C	2.61924e-08	-0.355015	0.012	0.136	0.000272192
Dbp80	7.04768e-09	-0.355613	0.144	0.33	7.32395e-05
vib	1.22831e-06	-0.357562	0.23	0.383	0.0127646
AnxB9	0.000811927	-0.357604	0.761	0.748	1
prage	3.26266e-09	-0.358801	0.021	0.162	3.39055e-05
CG5953	1.84415e-08	-0.359143	0.045	0.19	0.000191644
epsilonCOP	1.01003e-08	-0.362219	0.169	0.354	0.000104962
tsr	2.69387e-11	-0.362317	0.988	0.967	2.79947e-07
CG4793	4.25258e-08	-0.36381	0.021	0.147	0.000441928
RpL18A	4.75296e-16	-0.36736	0.975	0.964	4.93928e-12
18SrRNA:CR41548	0.00799609	-0.379429	0.387	0.274	1
Jafrac1	4.54022e-10	-0.379699	0.576	0.718	4.71819e-06
tx	1.26057e-07	-0.381006	0.008	0.118	0.00130998
CG32066	1.39395e-07	-0.381429	0.132	0.291	0.00144859
Gclc	1.20725e-08	-0.385537	0.062	0.217	0.000125457
28SrRNA:CR45837	0.910735	-0.389861	0.214	0.195	1
GstD3	0.000522853	-0.393701	0.313	0.41	1
CG2865	5.35434e-06	-0.400519	0.239	0.38	0.0556423
RpL28	5.81553e-15	-0.401259	0.984	0.969	6.0435e-11
CG9922	9.20876e-09	-0.406112	0.148	0.326	9.56975e-05
18SrRNA:CR45838	0.0138115	-0.406235	0.379	0.271	1
IM18	8.48295e-06	-0.408464	0.004	0.084	0.0881548
mod	1.84031e-06	-0.410064	0.358	0.491	0.0191245
RpS3A	5.81144e-24	-0.410113	0.979	0.987	6.03925e-20
E(spl)mbeta-HLH	1.07621e-05	-0.410333	0.14	0.266	0.111839
Dyak-FKBP59	1.73906e-08	-0.410888	0.091	0.253	0.000180723
mt:Cyt-b	5.13e-13	-0.412705	0.852	0.899	5.33109e-09
alphaTub85E	0.0936717	-0.413167	0.292	0.243	1
hdly	3.4705e-08	-0.423446	0.259	0.427	0.000360654
18SrRNA:CR45841	0.0266854	-0.424808	0.366	0.267	1
RpL9	2.50671e-13	-0.426036	0.905	0.917	2.60497e-09
Nph	1.12715e-07	-0.427184	0.329	0.474	0.00117134
sea	7.28039e-08	-0.432267	0.177	0.332	0.000756578
RpS18	1.04713e-15	-0.433647	0.914	0.929	1.08817e-11
sesB	1.60639e-08	-0.434221	0.893	0.882	0.000166936
CG31219	2.24217e-07	-0.436009	0.029	0.147	0.00233007
CG1890	8.14817e-08	-0.436378	0.387	0.545	0.000846758
RapGAP1	4.80826e-05	-0.438339	0.3	0.421	0.499674
GstE6	3.99495e-07	-0.440085	0.284	0.44	0.00415156
awd	6.33838e-16	-0.445269	0.959	0.945	6.58684e-12
RpS12	3.41299e-08	-0.452343	0.979	0.952	0.000354678
CG42807	0.00562626	-0.458961	0.523	0.573	1
RpS26	2.39138e-19	-0.462479	0.959	0.965	2.48512e-15
Dro	5.54958e-05	-0.463481	0	0.063	0.576712
Drs	0.483073	-0.464925	0.23	0.207	1
CecB	1.00465e-05	-0.478313	0.004	0.082	0.104403
GILT3	8.17435e-12	-0.478454	0	0.163	8.49479e-08
Thor	2.33108e-06	-0.482307	0.066	0.183	0.0242246
Arc2	1.12621e-10	-0.482568	0.021	0.182	1.17035e-06
GstE1	9.20746e-08	-0.49053	0.107	0.26	0.000956839
pirk	2.22687e-10	-0.499067	0.045	0.216	2.31416e-06
CG33461	6.73751e-12	-0.502327	0.004	0.171	7.00162e-08
mthl4	8.94706e-08	-0.511206	0.029	0.153	0.000929778
mthl6	7.63398e-12	-0.512208	0.016	0.191	7.93323e-08
CG43124	7.19117e-08	-0.519662	0.346	0.498	0.000747307
Tep4	6.35748e-07	-0.521352	0.416	0.55	0.00660669
shrb	1.96729e-10	-0.525338	0.247	0.44	2.04441e-06
CG43210	8.51314e-09	-0.530982	0.103	0.259	8.84686e-05
18SrRNA-Psi:CR45861	0.264284	-0.537928	0.28	0.222	1
GstO3	3.15259e-11	-0.541955	0.366	0.551	3.27617e-07
CG33465	2.07455e-12	-0.542982	0.156	0.381	2.15588e-08
Rel	8.16858e-09	-0.562079	0.222	0.394	8.48879e-05
RpL18	2.33558e-17	-0.566043	0.947	0.943	2.42713e-13
CG15784	0.123442	-0.567997	0.14	0.173	1
He	1.81403e-19	-0.571821	0.728	0.824	1.88514e-15
lncRNA:CR40469	4.28369e-09	-0.574218	0.206	0.384	4.45161e-05
GstD1	2.92638e-17	-0.58733	0.856	0.931	3.04109e-13
CG17760	2.84322e-10	-0.595745	0.078	0.251	2.95467e-06
Eglp4	7.15821e-12	-0.60317	0.078	0.277	7.43882e-08
CecA1	3.74357e-06	-0.607167	0.008	0.095	0.0389032
CG1572	8.49606e-13	-0.610908	0.531	0.674	8.82911e-09
GstE2	2.40069e-13	-0.618986	0.012	0.204	2.4948e-09
CG33225	0.000642284	-0.620032	0.128	0.214	1
18SrRNA-Psi:CR41602	6.61271e-06	-0.64946	0.321	0.452	0.0687193
Psc	3.56578e-12	-0.660397	0.082	0.284	3.70556e-08
CG42566	4.65455e-11	-0.671285	0.424	0.582	4.83701e-07
CG14253	8.30416e-15	-0.679985	0.251	0.489	8.62969e-11
Irk1	3.25347e-11	-0.682204	0.074	0.256	3.38101e-07
puc	2.31772e-15	-0.698171	0.074	0.315	2.40857e-11
CG30090	4.74878e-12	-0.699078	0.025	0.205	4.93493e-08
Nplp2	1.79259e-30	-0.752759	0.959	0.991	1.86286e-26
Jra	2.64404e-12	-0.774924	0.206	0.407	2.74769e-08
CG44250	1.91426e-14	-0.780444	0.008	0.21	1.9893e-10
lncRNA:CR44316	6.31944e-10	-0.784222	0	0.137	6.56716e-06
CG10467	0.26171	-0.785088	0.082	0.105	1
Mmp1	1.21337e-06	-0.78754	0.181	0.314	0.0126093
LamC	1.20335e-14	-0.814518	0.123	0.352	1.25053e-10
fok	0.00215972	-0.819124	0.16	0.1	1
CG30283	1.326e-17	-0.843297	0.012	0.253	1.37798e-13
CG1648	2.85213e-15	-0.873236	0.008	0.221	2.96394e-11
lectin-24A	1.06742e-09	-0.876955	0.025	0.174	1.10926e-05
Arc1	1.85576e-12	-0.881406	0.391	0.555	1.92851e-08
Ance	1.97434e-07	-0.909825	0.428	0.554	0.00205173
kay	1.15327e-13	-0.94422	0.255	0.456	1.19848e-09
atilla	0.000461796	-0.952174	0.016	0.075	1
betaTub60D	0.0365779	-0.956384	0.049	0.086	1
CecA2	1.95244e-08	-1.02601	0.004	0.122	0.000202897
CG3348	8.54155e-13	-1.04271	0.008	0.188	8.87638e-09
CecC	4.45934e-06	-1.04576	0.091	0.202	0.0463415
CG8620	8.67468e-12	-1.1125	0.185	0.369	9.01472e-08
MtnA	0.0142068	-1.11536	0.222	0.291	1
CG5399	4.61154e-10	-1.14985	0.128	0.298	4.79231e-06
CG15347	1.23467e-11	-1.1863	0.058	0.242	1.28307e-07
CG33460	9.96834e-21	-1.24763	0.078	0.358	1.03591e-16
Tep1	8.13528e-17	-1.33054	0.152	0.391	8.45418e-13
PPO1	0.00551102	-1.36332	0.292	0.213	1
lncRNA:CR43855	1.73881e-25	-1.62507	0.28	0.582	1.80697e-21
PPO2	0.0142508	-1.67532	0.366	0.281	1
CG42394	1.39629e-25	-2.01182	0.383	0.63	1.45102e-21
CG8157	1.78072e-33	-2.67725	0.63	0.802	1.85052e-29

[truncated: 7 more sheets: PM11, PM12, CC1, CC2, LM1, LM2, non-hemo]
