# Supplementary material for: A single-cell survey of Drosophila blood
Source: eLife. 2020 May 12;9:e54818. doi: 10.7554/eLife.54818 (PMC7237219; doi:10.7554/eLife.54818)
Supplement: Supplementary file 3. [file elife-54818-supp3.xlsx]

## Sheet: PM1
gene	Unwouned_AverageExpression	Wounded_AverageExpression	Wasp inf. 24h_AverageExpression
128up	-0.724615	-0.416281	1.1409
14-3-3epsilon	-0.0197896	-0.989958	1.00975
14-3-3zeta	-0.337225	-0.787792	1.12502
140up	0.811373	0.30583	-1.1172
18SrRNA-Psi:CR41602	1.13657	-0.391762	-0.744806
18SrRNA-Psi:CR45861	0.892185	0.188734	-1.08092
18SrRNA:CR41548	0.868339	0.224989	-1.09333
18SrRNA:CR45838	0.868253	0.225118	-1.09337
18SrRNA:CR45841	0.87403	0.216479	-1.09051
18w	-0.57735	1.1547	-0.57735
26-29-p	-0.242774	1.09903	-0.856261
28SrRNA-Psi:CR40596	0.76065	0.372043	-1.13269
28SrRNA-Psi:CR40741	1.06882	-0.155965	-0.912853
28SrRNA-Psi:CR41609	1.11226	-0.287509	-0.824752
28SrRNA-Psi:CR45848	1.03621	-0.0768634	-0.95935
28SrRNA-Psi:CR45851	0.803178	0.316867	-1.12004
28SrRNA-Psi:CR45853	1.07507	-0.172621	-0.902452
28SrRNA-Psi:CR45855	1.14718	-0.687504	-0.45968
28SrRNA-Psi:CR45859	1.06158	-0.924222	-0.137356
28SrRNA-Psi:CR45860	1.07777	-0.179982	-0.897787
28SrRNA-Psi:CR45862	1.14712	-0.459173	-0.687949
28SrRNA:CR45837	0.905707	0.167446	-1.07315
28SrRNA:CR45844	0.79181	0.331954	-1.12376
312	-1.03222	0.0679072	0.964316
4E-T	0.41599	0.724858	-1.14085
5-HT1A	-0.57735	-0.57735	1.1547
5.8SrRNA-Psi:CR45849	0.991135	0.017501	-1.00864
5.8SrRNA-Psi:CR45854	1.1546	-0.590495	-0.564105
5.8SrRNA-Psi:CR45857	0.975595	0.0471432	-1.02274
5.8SrRNA-Psi:CR45863	-0.337864	-0.787303	1.12517
5.8SrRNA:CR40454	1.15394	-0.540569	-0.613366
5.8SrRNA:CR45839	1.15394	-0.540569	-0.613366
5.8SrRNA:CR45842	1.15394	-0.540569	-0.613366
5.8SrRNA:CR45852	1.15394	-0.540569	-0.613366
5PtaseI	0.888061	0.195118	-1.08318
7B2	-0.57735	1.1547	-0.57735
7SLRNA:CR32864	0.933607	0.121656	-1.05526
7SLRNA:CR42652	0.933607	0.121656	-1.05526
a	-0.59089	1.15459	-0.563704
A16	-0.843313	-0.261437	1.10475
a6	0.336514	0.788335	-1.12485
AANAT1	0.598859	0.555571	-1.15443
AANATL2	-0.57735	1.1547	-0.57735
Aasdh	0.345219	0.781653	-1.12687
Aatf	-0.722828	-0.418419	1.14125
aay	-0.426468	1.14253	-0.716064
ab	0.646847	0.504943	-1.15179
ABCA	0.413086	0.727277	-1.14036
ABCB7	-1.07549	0.901744	0.173742
ABCD	0.317432	0.802756	-1.12019
abd-A	-0.868935	1.09304	-0.224102
Abd-B	-1.02316	0.975103	0.0480611
Abi	0.561684	0.592876	-1.15456
Abl	0.709268	0.434483	-1.14375
abo	0.0788788	0.958225	-1.0371
Abp1	0.0797459	0.957739	-1.03749
abs	-1.15219	0.510184	0.642006
Ac13E	0.202667	0.883143	-1.08581
Ac3	-0.865848	-0.228688	1.09454
Ac76E	-0.647402	-0.50434	1.15174
Ac78C	-0.687707	-0.459449	1.14716
Acbp1	-0.910467	-0.159817	1.07028
Acbp2	-0.257034	1.10343	-0.846393
Acbp3	-0.57735	-0.57735	1.1547
Acbp4	-0.57735	1.1547	-0.57735
Acbp5	0.64859	0.50305	-1.15164
Acbp6	-0.623097	1.15346	-0.530362
ACC	0.821589	0.291874	-1.11346
AcCoAS	-0.13301	-0.926838	1.05985
Ace	1.10992	-0.27919	-0.830735
Acer	0.514818	0.637701	-1.15252
Acf	0.602671	0.551653	-1.15432
achi	0.343857	0.782703	-1.12656
acj6	0.893251	0.187075	-1.08033
Ack	1.02604	-0.0542985	-0.971745
Ack-like	-0.782191	-0.344522	1.12671
Acn	-0.672244	-0.476938	1.14918
Acox57D-d	0.183847	0.89532	-1.07917
Acox57D-p	0.666116	0.483776	-1.14989
Acp95EF	0.72517	0.415616	-1.14079
Acph-1	0.697933	0.447693	-1.14563
Acsl	-1.1375	0.396796	0.740705
Act42A	-0.551027	-0.60328	1.15431
Act57B	0.192177	0.889965	-1.08214
Act5C	0.706015	0.438294	-1.14431
Act79B	-0.195895	1.08345	-0.887557
Act87E	-1.12746	0.347789	0.779668
Act88F	-0.467324	-0.680781	1.14811
Actbeta	1.12298	-0.328697	-0.79428
Actn	0.795388	0.327233	-1.12262
ACXD	1.1547	-0.57735	-0.57735
Acyp2	-0.860299	-0.236869	1.09717
Ada	0.166698	0.906176	-1.07287
Ada1-1	1.0287	-0.060111	-0.968589
Ada1-2	-0.0421428	1.02041	-0.978262
Ada2a	-0.667275	-0.482486	1.14976
Ada2b	1.14527	-0.700195	-0.445073
Ada3	0.681477	0.466536	-1.14801
AdamTS-A	-0.868884	-0.224178	1.09306
AdamTS-B	-0.57735	-0.57735	1.1547
Adar	0.982519	0.0340904	-1.01661
Adat1	-0.0946987	1.04398	-0.949282
Adck1	0.141426	0.921758	-1.06318
Adck5	0.431813	0.711538	-1.14335
ADD1	0.865437	0.229296	-1.09473
AdenoK	1.0633	-0.921587	-0.141709
Adf1	0.151733	-1.0672	0.915462
Adgf-A	-0.675952	-0.472774	1.14873
Adgf-A2	-0.57735	1.1547	-0.57735
Adh	0.648067	0.503618	-1.15168
Adhr	0.393847	0.743111	-1.13696
Adi1	-0.834957	-0.273272	1.10823
AdipoR	-0.284809	-0.826699	1.11151
Adk1	1.14622	-0.452169	-0.694056
Adk2	-0.595688	-0.558817	1.1545
Adk3	0.497678	0.653512	-1.15119
AdoR	-1.11702	0.811881	0.305141
adp	0.777696	0.350335	-1.12803
AdSL	0.116082	0.936893	-1.05297
AdSS	0.839169	-1.1065	0.267326
Aduk	0.112818	0.938807	-1.05162
Ady43A	0.861378	0.235284	-1.09666
Aef1	-0.669143	-0.480404	1.14955
aft	0.693181	0.453175	-1.14636
Afti	0.492127	0.658568	-1.1507
Ag5r	-0.57735	-0.57735	1.1547
Ag5r2	-0.57735	1.1547	-0.57735
AGBE	-0.71048	-0.433058	1.14354
AgmNAT	-0.504182	-0.647548	1.15173
ago	1.02133	-0.0441132	-0.977213
AGO1	1.1122	-0.287308	-0.824897
AGO2	-0.00504858	1.00251	-0.997466
AGO3	0.399896	0.738168	-1.13806
Agpat1	0.73017	0.409602	-1.13977
Agpat2	-0.57735	1.1547	-0.57735
Agpat3	-0.773517	-0.355706	1.12922
Agpat4	-1.15313	0.628658	0.524475
agt	0.681958	0.465991	-1.14795
Ahcy	0.619998	0.533625	-1.15362
AhcyL1	0.198155	0.886088	-1.08424
AIF	0.51527	0.63728	-1.15255
AIMP1	-0.721989	-0.419422	1.14141
AIMP2	-0.790919	-0.333125	1.12404
AIMP3	-0.764636	-0.367015	1.13165
Ak6	-0.816011	-0.299521	1.11553
Akap200	-0.708167	-0.435774	1.14394
Akh	-0.57735	-0.57735	1.1547
akirin	0.00602036	-1.003	0.996976
Akt1	0.68221	0.465705	-1.14791
Aladin	0.648207	0.503466	-1.15167
AlaRS	0.565231	0.589385	-1.15462
AlaRS-m	0.305071	0.811933	-1.117
Alas	-0.30679	1.11745	-0.810664
alc	0.758671	0.37453	-1.1332
Ald1	0.600332	0.554059	-1.15439
Aldh	-0.403691	1.13874	-0.735051
Aldh-III	0.675694	0.473064	-1.14876
Aldh7A1	-0.799407	-0.3219	1.12131
Alg-2	-1.00414	0.00834023	0.995804
Alg1	1.08933	-0.212971	-0.876359
Alg10	-0.884917	-0.199952	1.08487
Alg11	-0.961781	-0.0724924	1.03427
Alg14	-0.812606	-0.304157	1.11676
Alg2	-0.70768	-0.436344	1.14402
Alg3	0.746288	0.389935	-1.13622
Alg9	-0.0744758	1.03516	-0.96068
Alh	-0.540536	-0.613398	1.15393
alien	-1.14192	0.422617	0.719308
ALiX	0.956336	0.0822478	-1.03858
Alk	-0.98179	-0.0354766	1.01727
AlkB	-1.14094	0.416546	0.724394
Alp12	0.710051	0.433563	-1.14361
alph	-0.373724	-0.759313	1.13304
alpha-Cat	-0.87915	-0.208747	1.0879
alpha-Est1	0.954914	0.0847753	-1.03969
alpha-Est10	0.505396	0.64643	-1.15183
alpha-Est3	0.323469	-1.1217	0.798227
alpha-Est4	1.09805	-0.239635	-0.858411
alpha-Est5	0	0	0
alpha-Est7	0.541794	0.612191	-1.15398
alpha-Est8	-0.809029	-0.309001	1.11803
alpha-Est9	0.810006	0.30768	-1.11769
alpha-Man-Ia	0.568978	0.585682	-1.15466
alpha-Man-Ib	0.231254	0.864114	-1.09537
alpha-Man-Ic	1.02109	-0.0436158	-0.977478
alpha-Man-IIa	0.673211	0.475854	-1.14906
alpha-Man-IIb	-0.54004	-0.613874	1.15391
alpha-PheRS	-1.13534	0.385323	0.750018
alpha-Spec	0.777724	0.3503	-1.12802
alpha4GT1	0.299577	0.81597	-1.11555
alphaCOP	0.580358	0.574338	-1.1547
alphaSnap	-1.09248	0.222408	0.870071
alphaTub67C	-1.15005	0.66464	0.485415
alphaTub84B	-0.662325	-0.48798	1.1503
alphaTub84D	1.05038	-0.940552	-0.109829
alphaTub85E	-0.0460528	1.02223	-0.976178
Alr	0.927644	0.131668	-1.05931
Als2	0.625478	0.527846	-1.15332
alt	-0.571382	-0.583298	1.15468
Ama	0.437913	0.70634	-1.14425
Amacr	-1.09579	0.232576	0.863218
amn	0.471741	0.67687	-1.14861
amon	-0.57735	-0.57735	1.1547
AMPdeam	-0.683237	-0.464539	1.14778
Amph	-1.10117	0.851528	0.249643
AMPKalpha	0.696135	0.449771	-1.14591
Amun	0.644224	-1.15201	0.507786
amx	-0.719498	1.14189	-0.42239
ana	-0.57735	-0.57735	1.1547
ana1	0.974506	-1.02368	0.0491742
ana2	1.0746	-0.171332	-0.903265
ana3	0.830416	0.279635	-1.11005
Ance	-0.659725	-0.490852	1.15058
Ance-2	-0.558895	-0.595611	1.15451
Ance-3	-0.00722697	1.00359	-0.996367
Ance-4	-0.561609	-0.59295	1.15456
Ance-5	0.584568	0.570102	-1.15467
anchor	0.819083	0.295318	-1.1144
angel	-0.562599	-0.591977	1.15458
Ank	0.656754	0.494123	-1.15088
Ank2	-0.778444	-0.349371	1.12781
Ankle2	0.747381	0.388587	-1.13597
anne	0.353813	0.774993	-1.12881
anox	-0.216431	-0.874061	1.09049
Ant2	-0.888572	-0.19433	1.0829
antdh	-1.14726	0.460273	0.686985
Antp	-0.640418	-0.511896	1.15231
antr	1.05691	-0.125708	-0.931202
AnxB10	0.438472	0.705863	-1.14433
AnxB11	-0.294721	1.11424	-0.819518
AnxB9	-0.674053	-0.474909	1.14896
aop	-0.878839	-0.209219	1.08806
aos	1.01548	-0.0317219	-0.983762
Aos1	-0.805483	-0.313776	1.11926
AOX1	0.636271	0.516352	-1.15262
AOX3	0.71782	0.424385	-1.1422
ap	-0.57735	1.1547	-0.57735
AP-1-2beta	0.742951	0.394043	-1.13699
AP-1gamma	0.634456	0.518296	-1.15275
AP-1mu	0.583268	0.571412	-1.15468
AP-1sigma	-0.973232	-0.051543	1.02477
AP-2alpha	0.550841	0.60346	-1.1543
AP-2mu	0.820438	0.293458	-1.1139
AP-2sigma	-0.995854	1.0041	-0.00824177
Apc	0.519977	0.632882	-1.15286
APC10	1.15221	-0.510417	-0.64179
Apc2	0.597282	0.557186	-1.15447
APC4	0.794786	0.328028	-1.12281
ApepP	0.218794	0.872488	-1.09128
Apf	-0.968337	-0.0605724	1.02891
aph-1	-1.04383	0.094341	0.949486
aPKC	0.523513	0.629563	-1.15308
Apl	0.674123	0.474831	-1.14895
Aplip1	0.967311	-1.02976	0.0624509
apolpp	-0.0759714	1.03582	-0.959848
Apoltp	0.987385	0.0247699	-1.01215
app	-0.776082	-0.352413	1.1285
APP-BP1	0.287235	0.82495	-1.11218
Appl	1.02827	-0.0591656	-0.969104
Aprt	-0.504637	-0.647129	1.15177
Aps	-0.52201	-0.630975	1.15299
apt	-0.827556	-0.28362	1.11118
aqz	-0.517351	-0.635339	1.15269
ara	-0.57735	-0.57735	1.1547
aralar1	1.02804	-0.0586716	-0.969372
Arc1	-0.970961	-0.055746	1.02671
Arc2	-0.62504	-0.52831	1.15335
Arc42	-0.510168	1.15219	-0.642021
Archease	-1.13981	0.729977	0.409834
Arf102F	-0.739728	-0.397991	1.13772
Arf51F	-0.164331	-0.907656	1.07199
Arf79F	0.479863	-1.14949	0.669628
ArfGAP1	0.71436	0.428484	-1.14284
ArfGAP3	0.880066	0.207356	-1.08742
Arfip	-0.53245	-0.621116	1.15357
Arfrp1	-0.712084	-0.43117	1.14325
arg	0.757705	0.375742	-1.13345
Argk	-1.13267	0.371905	0.76076
Argl	0.84804	-1.10271	0.25467
ArgRS	0.228498	0.865976	-1.09447
ArgRS-m	0.90772	0.164228	-1.07195
ari-1	-0.677445	-0.471093	1.14854
ari-2	0.295667	0.818829	-1.1145
Arl1	0.077902	-1.03667	0.958771
Arl2	-1.1383	0.401214	0.737087
Arl4	-0.480904	-0.668695	1.1496
Arl5	-1.02003	0.0413421	0.978688
Arl6	-1.15361	0.620272	0.533337
Arl6IP1	0.971392	-1.02634	0.0549508
Arl8	0.664403	0.485678	-1.15008
arm	0.926083	0.134267	-1.06035
armi	-0.09444	1.04387	-0.94943
Arp1	0.382824	0.752031	-1.13485
Arp10	1.13398	-0.378391	-0.755588
Arp2	0.356647	0.772782	-1.12943
Arp3	-0.533929	-0.619709	1.15364
Arp5	-0.201409	1.08538	-0.883966
Arp53D	0	0	0
Arp6	1.11324	-0.291055	-0.822184
Arp8	0.799668	0.321552	-1.12122
Arpc1	1.11009	-0.27976	-0.830327
Arpc2	-0.285017	-0.82655	1.11157
Arpc3A	-0.896508	-0.181988	1.0785
Arpc3B	-0.892492	-0.188256	1.08075
Arpc4	-0.821895	-0.291454	1.11335
Arpc5	-0.599348	-0.55507	1.15442
arr	0.3991	0.738821	-1.13792
Ars2	-0.686005	-0.461391	1.1474
Art1	1.12956	-0.357253	-0.772309
Art3	-0.318873	1.12055	-0.801678
Art4	0.796106	0.326282	-1.12239
Art7	-1.15355	0.532056	0.621489
Art8	-1.12316	0.329432	0.793723
Arts	0.117936	0.935803	-1.05374
aru	-0.711003	-0.432443	1.14345
Arv1	0.834462	0.273968	-1.10843
arx	-0.21811	-0.872944	1.09105
Asap	0.626228	0.527052	-1.15328
Asator	0.297964	0.817151	-1.11512
Asciz	1.15027	-0.487646	-0.662626
asf1	0.946513	0.0995309	-1.04604
ash1	0.619269	0.534391	-1.15366
ash2	-0.605477	1.15424	-0.548759
Ask1	0.481431	0.668222	-1.14965
asl	-0.805988	1.11909	-0.313097
AsnRS	0.636478	0.51613	-1.15261
AsnRS-m	0.927147	-1.05964	0.132496
AsnS	0.291034	0.822199	-1.11323
asp	0.815728	0.299908	-1.11564
Asph	0.973091	0.0518038	-1.0249
ASPP	0.722001	0.419407	-1.14141
AspRS	0.55971	0.594812	-1.15452
AspRS-m	0.506561	0.645355	-1.15192
asrij	-0.974355	-0.0494552	1.02381
asRNA:ASTR	1.13707	-0.394447	-0.742621
asRNA:CR17025	-0.57735	1.1547	-0.57735
asRNA:CR31144	-0.613038	-0.540911	1.15395
asRNA:CR31514	0.414073	0.726456	-1.14053
asRNA:CR31912	-0.57735	-0.57735	1.1547
asRNA:CR32252	0	0	0
asRNA:CR33945	0.715941	0.426613	-1.14255
asRNA:CR42254	0.0245288	-1.01204	0.98751
asRNA:CR42547	0.995252	0.00943012	-1.00468
asRNA:CR42738	-0.846305	-0.25716	1.10347
asRNA:CR42871	0.392164	0.744479	-1.13664
asRNA:CR43152	0	0	0
asRNA:CR43159	-0.181238	-0.896986	1.07822
asRNA:CR43257	-0.667837	-0.481861	1.1497
asRNA:CR43425	1.0989	-0.856556	-0.242344
asRNA:CR43426	-0.629358	1.15309	-0.523731
asRNA:CR43460	0	0	0
asRNA:CR43463	0.539137	0.614738	-1.15388
asRNA:CR43465	1.07062	-0.160705	-0.909916
asRNA:CR43466	0	0	0
asRNA:CR43468	-1.057	0.931077	0.125919
asRNA:CR43474	-0.779814	-0.3476	1.12741
asRNA:CR43476	-0.57735	-0.57735	1.1547
asRNA:CR43480	-0.57735	-0.57735	1.1547
asRNA:CR43481	1.01484	-0.0303734	-0.984467
asRNA:CR43629	-1.12733	0.34721	0.780116
asRNA:CR43637	1.10639	-0.266956	-0.83943
asRNA:CR43683	-0.558763	-0.59574	1.1545
asRNA:CR43723	-0.67523	-0.473587	1.14882
asRNA:CR43730	1.10475	-0.261445	-0.843308
asRNA:CR43767	-0.57735	-0.57735	1.1547
asRNA:CR43786	-0.57735	-0.57735	1.1547
asRNA:CR43787	1.13416	-0.379277	-0.754878
asRNA:CR43809	0.511101	0.641156	-1.15226
asRNA:CR43812	0.583813	0.570863	-1.15468
asRNA:CR43824	-0.903305	1.07457	-0.171269
asRNA:CR43833	0.299043	0.816361	-1.1154
asRNA:CR43864	0.907799	-1.0719	0.164102
asRNA:CR43868	0.643812	0.508233	-1.15204
asRNA:CR43875	0.632282	0.520617	-1.1529
asRNA:CR43889	-0.646394	-0.505436	1.15183
asRNA:CR43906	-1.14655	0.454631	0.691914
asRNA:CR43916	0.904373	0.169571	-1.07394
asRNA:CR43933	0.8218	0.291584	-1.11338
asRNA:CR43944	1.10311	-0.255999	-0.847115
asRNA:CR43957	0.460612	0.686687	-1.1473
asRNA:CR43964	0.581483	0.573208	-1.15469
asRNA:CR43981	0	0	0
asRNA:CR44019	-0.57735	-0.57735	1.1547
asRNA:CR44021	0.739346	0.398458	-1.1378
asRNA:CR44029	1.14994	-0.484212	-0.665724
asRNA:CR44030	-0.5022	-0.64937	1.15157
asRNA:CR44031	0.422817	0.719139	-1.14196
asRNA:CR44045	-0.756534	1.13374	-0.377208
asRNA:CR44046	-0.133075	1.05987	-0.9268
asRNA:CR44047	0	0	0
asRNA:CR44049	0.634796	-1.15273	0.517931
asRNA:CR44053	1.1547	-0.578919	-0.575781
asRNA:CR44054	1.09424	-0.227765	-0.866471
asRNA:CR44064	0.958842	0.0777734	-1.03662
asRNA:CR44065	0.367808	0.764008	-1.13182
asRNA:CR44067	1.00396	-0.00797518	-0.995989
asRNA:CR44069	-0.57735	-0.57735	1.1547
asRNA:CR44093	-0.772764	-0.356671	1.12943
asRNA:CR44095	0.521864	0.631113	-1.15298
asRNA:CR44114	-0.859749	-0.237677	1.09743
asRNA:CR44116	0	0	0
asRNA:CR44119	1.07453	-0.903381	-0.171147
asRNA:CR44124	0.069301	-1.03285	0.963547
asRNA:CR44134	1.14089	-0.724669	-0.416216
asRNA:CR44137	-0.57735	-0.57735	1.1547
asRNA:CR44147	0.978629	0.0414525	-1.02008
asRNA:CR44160	1.1244	-0.789787	-0.334611
asRNA:CR44168	0.139176	0.923121	-1.0623
asRNA:CR44169	0.58273	0.571954	-1.15468
asRNA:CR44176	-0.57735	-0.57735	1.1547
asRNA:CR44179	0.614892	0.538977	-1.15387
asRNA:CR44182	0	0	0
asRNA:CR44201	0.664315	-1.15009	0.485775
asRNA:CR44224	1.10721	-0.269764	-0.837445
asRNA:CR44228	0.764559	0.367112	-1.13167
asRNA:CR44266	0.926279	0.133941	-1.06022
asRNA:CR44267	0.59396	0.56058	-1.15454
asRNA:CR44291	0.35954	0.770518	-1.13006
asRNA:CR44321	-0.57735	-0.57735	1.1547
asRNA:CR44340	-1.04743	0.1028	0.944629
asRNA:CR44367	0.181604	0.896753	-1.07836
asRNA:CR44368	1.08989	-0.214644	-0.875249
asRNA:CR44370	0	0	0
asRNA:CR44372	-0.726666	-0.413821	1.14049
asRNA:CR44374	-0.57735	1.1547	-0.57735
asRNA:CR44375	-0.854143	-0.245854	1.1
asRNA:CR44381	-0.476796	-0.67237	1.14917
asRNA:CR44382	-0.764231	1.13176	-0.367526
asRNA:CR44386	-0.28105	1.11045	-0.829402
asRNA:CR44390	-0.57735	1.1547	-0.57735
asRNA:CR44416	-0.57735	-0.57735	1.1547
asRNA:CR44429	-1.15234	0.640072	0.512268
asRNA:CR44431	0.0723046	0.961885	-1.03419
asRNA:CR44512	-0.57735	-0.57735	1.1547
asRNA:CR44599	1.15298	-0.521875	-0.631102
asRNA:CR44600	-0.57735	1.1547	-0.57735
asRNA:CR44690	1.00021	-0.000415623	-0.999792
asRNA:CR44703	0	0	0
asRNA:CR44704	0.985239	0.0288961	-1.01413
asRNA:CR44724	1.13564	-0.386869	-0.74877
asRNA:CR44793	0.675775	0.472974	-1.14875
asRNA:CR44806	-0.210965	-0.877686	1.08865
asRNA:CR44807	0.853375	0.24697	-1.10034
asRNA:CR44841	0.72223	0.419133	-1.14136
asRNA:CR44843	-0.933885	-0.121186	1.05507
asRNA:CR44849	0.832916	0.276137	-1.10905
asRNA:CR44872	0.745432	0.390991	-1.13642
asRNA:CR44891	-0.648363	-0.503296	1.15166
asRNA:CR44892	0.82556	-1.11195	0.286389
asRNA:CR44910	-0.57735	-0.57735	1.1547
asRNA:CR44911	-1.0958	0.232583	0.863213
asRNA:CR44959	-1.0609	0.925252	0.135647
asRNA:CR44960	0.994469	0.0109708	-1.00544
asRNA:CR44961	-0.649786	-0.501747	1.15153
asRNA:CR44962	0.828398	0.282448	-1.11085
asRNA:CR44968	-0.956116	1.03876	-0.0826387
asRNA:CR44969	0.881566	0.205074	-1.08664
asRNA:CR44972	0	0	0
asRNA:CR44976	-0.680744	-0.467366	1.14811
asRNA:CR44981	0.620394	0.533209	-1.1536
asRNA:CR44982	0.635136	0.517568	-1.1527
asRNA:CR44987	0.275533	0.833347	-1.10888
asRNA:CR44989	-0.275976	-0.833031	1.10901
asRNA:CR44992	-0.980753	1.0182	-0.0374418
asRNA:CR44996	-0.57735	-0.57735	1.1547
asRNA:CR44998	-0.891979	1.08103	-0.189054
asRNA:CR45000	0.0979221	-1.04536	0.947437
asRNA:CR45007	0.38825	0.747653	-1.1359
asRNA:CR45009	-0.57735	-0.57735	1.1547
asRNA:CR45026	1.10751	-0.270793	-0.836716
asRNA:CR45028	0.258037	0.845693	-1.10373
asRNA:CR45044	0.955408	0.083898	-1.03931
asRNA:CR45053	-0.220251	1.09177	-0.871515
asRNA:CR45108	-0.57735	-0.57735	1.1547
asRNA:CR45124	-0.638374	-0.514095	1.15247
asRNA:CR45126	0.389416	0.746709	-1.13613
asRNA:CR45129	-1.01166	0.987918	0.0237407
asRNA:CR45131	-0.57735	-0.57735	1.1547
asRNA:CR45132	0.793742	0.329408	-1.12315
asRNA:CR45135	0	0	0
asRNA:CR45136	-1.1359	0.38822	0.747678
asRNA:CR45139	0.458475	0.688559	-1.14703
asRNA:CR45140	-0.738788	-0.399139	1.13793
asRNA:CR45141	0.722833	0.418413	-1.14125
asRNA:CR45142	0.485194	0.664839	-1.15003
asRNA:CR45145	1.09879	-0.241985	-0.856802
asRNA:CR45149	1.1547	-0.57735	-0.57735
asRNA:CR45160	0.196493	0.887168	-1.08366
asRNA:CR45163	0.731803	0.407629	-1.13943
asRNA:CR45164	0.865878	0.228643	-1.09452
asRNA:CR45171	-1.14703	0.688613	0.458413
asRNA:CR45175	0.977933	0.0427619	-1.02069
asRNA:CR45182	-0.57735	1.1547	-0.57735
asRNA:CR45185	0.0535219	0.972164	-1.02569
asRNA:CR45189	0.215375	0.874763	-1.09014
asRNA:CR45190	0.0508955	0.97358	-1.02448
asRNA:CR45195	0.809573	0.308265	-1.11784
asRNA:CR45198	1.09531	-0.231066	-0.864241
asRNA:CR45202	-0.57735	-0.57735	1.1547
asRNA:CR45208	0.655875	0.495088	-1.15096
asRNA:CR45210	-0.57735	-0.57735	1.1547
asRNA:CR45214	0.233316	0.862716	-1.09603
asRNA:CR45264	0.134638	0.92586	-1.0605
asRNA:CR45272	-0.57735	-0.57735	1.1547
asRNA:CR45275	0.705078	0.439388	-1.14447
asRNA:CR45281	-0.966567	1.03038	-0.0638108
asRNA:CR45326	-1.15341	0.623893	0.529521
asRNA:CR45350	0.668861	0.480719	-1.14958
asRNA:CR45366	-0.730488	-0.409218	1.13971
asRNA:CR45367	0.444636	0.700571	-1.14521
asRNA:CR45396	-0.612463	-0.541511	1.15397
asRNA:CR45397	-1.12534	0.338618	0.786726
asRNA:CR45445	-0.57735	-0.57735	1.1547
asRNA:CR45466	-0.447514	-0.698088	1.1456
asRNA:CR45467	-0.828185	-0.282744	1.11093
asRNA:CR45468	-0.226465	1.09381	-0.867347
asRNA:CR45479	-0.761504	-0.370968	1.13247
asRNA:CR45485	0.753967	-1.13438	0.380413
asRNA:CR45501	-0.502242	-0.649331	1.15157
asRNA:CR45518	-0.57735	-0.57735	1.1547
asRNA:CR45520	0.720308	0.421426	-1.14173
asRNA:CR45528	-0.624194	1.1534	-0.529203
asRNA:CR45549	-0.87961	-0.208049	1.08766
asRNA:CR45600	1.13424	-0.379701	-0.754538
asRNA:CR45604	0.265616	0.840376	-1.10599
asRNA:CR45612	-0.57735	-0.57735	1.1547
asRNA:CR45620	-0.717063	1.14235	-0.425283
asRNA:CR45682	-0.57735	-0.57735	1.1547
asRNA:CR45683	-0.0703927	-0.962944	1.03334
asRNA:CR45686	0.550291	0.603993	-1.15428
asRNA:CR45713	-0.740981	1.13744	-0.396459
asRNA:CR45714	-0.60922	-0.544883	1.1541
asRNA:CR45778	0.051898	0.97304	-1.02494
asRNA:CR45789	0.599615	0.554796	-1.15441
asRNA:CR45798	0.485809	0.664284	-1.15009
asRNA:CR45800	-0.57735	1.1547	-0.57735
asRNA:CR45804	0	0	0
asRNA:CR45806	0.747772	0.388104	-1.13588
asRNA:CR45813	-0.57735	-0.57735	1.1547
asRNA:CR45814	-0.0161538	1.00798	-0.991825
asRNA:CR45815	-0.57735	-0.57735	1.1547
asRNA:CR45818	0.60249	0.55184	-1.15433
asRNA:CR45822	-0.58469	-0.569979	1.15467
asRNA:CR45827	-0.57735	-0.57735	1.1547
asRNA:CR45831	0.158528	0.911267	-1.06979
asRNA:CR45835	-0.614839	-0.539031	1.15387
asRNA:CR45865	-1.07039	0.910292	0.1601
asRNA:CR45870	0.288229	0.824231	-1.11246
asRNA:CR45871	-0.814348	-0.301788	1.11614
asRNA:CR45873	-0.666448	1.14985	-0.483407
asRNA:CR45874	0.822208	-1.11323	0.291021
asRNA:CR45875	-0.57735	-0.57735	1.1547
asRNA:CR45889	0.391026	0.745404	-1.13643
asRNA:CR45891	-0.770376	-0.359721	1.1301
asRNA:CR45892	1.13632	-0.390425	-0.745891
asRNA:CR45895	0.7301	0.409685	-1.13979
asRNA:CR45896	0	0	0
asRNA:CR45907	-0.188651	-0.892238	1.08089
asRNA:CR45908	-0.702166	-0.442782	1.14495
asRNA:CR45912	1.07932	-0.184261	-0.895055
asRNA:CR45925	-0.33973	1.1256	-0.785874
asRNA:CR45926	0.446106	0.699304	-1.14541
asRNA:CR45928	1.01758	-0.0361433	-0.981438
asRNA:CR45929	0.858929	0.238878	-1.09781
asRNA:CR45943	0.588576	-1.15463	0.566051
asRNA:CR45951	1.04194	-0.0899535	-0.951984
asRNA:CR45952	0.573996	-1.15469	0.580698
asRNA:CR45968	0.948745	0.0956384	-1.04438
asRNA:CR45969	-0.57735	-0.57735	1.1547
asRNA:CR45970	-0.57735	-0.57735	1.1547
asRNA:CR45999	0.414644	0.72598	-1.14062
asRNA:CR46018	1.1547	-0.57735	-0.57735
asRNA:CR46020	1.14629	-0.452696	-0.693597
asRNA:CR46029	-1.13452	0.381111	0.753407
asRNA:CR46033	-0.57735	-0.57735	1.1547
asRNA:CR46044	-0.57735	-0.57735	1.1547
asRNA:CR46048	1.13805	-0.399819	-0.738231
asRNA:CR46050	0	0	0
asRNA:CR46055	-1.15056	0.490718	0.659846
asRNA:CR46067	0.427289	0.71537	-1.14266
asRNA:CR46081	0.146995	0.918366	-1.06536
asRNA:CR46089	0.875375	0.214454	-1.08983
asRNA:CR46091	1.01955	-0.0403243	-0.979228
asRNA:CR46093	-0.591621	-0.562961	1.15458
asRNA:CR46096	1.1547	-0.57735	-0.57735
asRNA:CR46097	0.301771	0.814361	-1.11613
asRNA:CR46099	-0.512103	-0.640225	1.15233
asRNA:CR46104	0.701494	0.443564	-1.14506
asRNA:CR46105	1.05133	-0.939221	-0.112109
asRNA:CR46109	-0.716447	-0.426013	1.14246
asRNA:CR46133	0.0437272	0.977419	-1.02115
asRNA:CR46134	0.769016	0.361455	-1.13047
asRNA:CR46135	0.753822	0.380595	-1.13442
asRNA:CR46137	1.09644	-0.234597	-0.861845
asRNA:CR46138	0.637913	0.51459	-1.1525
asRNA:CR46140	0.921846	0.141282	-1.06313
asRNA:CR46145	-0.57735	1.1547	-0.57735
asRNA:CR46255	0.459927	0.687288	-1.14722
asRNA:CR46262	1.0155	-0.0317543	-0.983745
asRNA:CR46354	-0.0992548	1.04593	-0.946671
ast	0.786392	0.339054	-1.12545
AstA	0.5158	0.636786	-1.15259
AstA-R1	0.105324	0.943169	-1.04849
asun	0.225301	0.86813	-1.09343
Asx	0.612672	0.541293	-1.15396
Atac1	-1.14078	0.725179	0.415605
Atac2	-0.220332	1.09179	-0.87146
Atac3	-0.43009	-0.713	1.14309
ATbp	0.684062	0.463602	-1.14766
Ate1	0.840359	0.265639	-1.106
Atet	0.612229	0.541754	-1.15398
Atf-2	1.146	-0.45045	-0.695547
Atf3	-0.598505	1.15444	-0.555934
Atf6	-1.14731	0.46068	0.686628
Atg1	-0.778684	1.12774	-0.349061
Atg10	-1.00044	0.999559	0.000880461
Atg101	0.499513	0.651834	-1.15135
Atg12	-0.811753	1.11707	-0.305314
Atg13	0.967945	0.0612897	-1.02924
Atg14	0.89639	0.182174	-1.07856
Atg16	0.490027	0.660473	-1.1505
Atg17	-0.811169	-0.306106	1.11728
Atg18a	-0.793063	1.12337	-0.330302
Atg18b	-1.09559	0.863647	0.231943
Atg2	0.718733	0.4233	-1.14203
Atg3	0.989142	-1.01052	0.0213732
Atg4a	-0.728946	-0.411077	1.14002
Atg4b	0.611508	0.542505	-1.15401
Atg5	0.824127	0.288373	-1.1125
Atg6	0.81236	0.304491	-1.11685
Atg7	-0.145714	1.06486	-0.919149
Atg8a	-0.625464	-0.527861	1.15332
Atg8b	0	0	0
Atg9	-0.168365	1.0735	-0.90513
atilla	-0.655582	-0.49541	1.15099
atk	-0.980202	-0.0384843	1.01869
atl	0.701006	0.44413	-1.14514
atms	-1.04187	0.0898081	0.952067
Atox1	0.450759	0.695279	-1.14604
ATP6AP2	0.531066	0.62243	-1.1535
ATP7	0.806619	0.312249	-1.11887
ATP8A	0.306479	0.810894	-1.11737
ATP8B	0.239353	0.858604	-1.09796
Atpalpha	0.906725	0.16582	-1.07255
ATPCL	0.775012	0.353788	-1.1288
ATPsynB	0.486816	0.663376	-1.15019
ATPsynbeta	0.531838	0.621696	-1.15353
ATPsynbetaL	-0.57735	1.1547	-0.57735
ATPsynC	-0.646148	-0.505701	1.15185
ATPsynCF6	0.494886	0.656059	-1.15094
ATPsynCF6L	-0.57735	1.1547	-0.57735
ATPsynD	0.532728	0.620851	-1.15358
ATPsyndelta	0.367653	0.764131	-1.13178
ATPsynE	-0.727274	-0.41309	1.14036
ATPsynepsilonL	1.06326	-0.141622	-0.921639
ATPsynF	-0.803358	-0.316625	1.11998
ATPsynG	0.47973	0.669747	-1.14948
ATPsyngamma	0.427104	0.715526	-1.14263
ATPsynGL	0.665295	0.484688	-1.14998
ATPsynO	0.36233	0.768328	-1.13066
AttA	-0.586063	-0.568593	1.15466
AttB	-0.504856	-0.646927	1.15178
AttC	-0.57735	1.1547	-0.57735
AttD	-1.12118	0.321383	0.799795
Atu	0.856923	0.241809	-1.09873
Atx-1	0.486232	0.663904	-1.15014
Atx2	0.485648	0.66443	-1.15008
Atxn7	0.240986	0.857487	-1.09847
aub	-0.676537	1.14865	-0.472116
aurA	0.780879	0.346222	-1.1271
aurB	0.0521429	-1.02505	0.972908
aust	-0.57735	1.1547	-0.57735
aux	0.728087	0.412111	-1.1402
ave	-1.12723	0.346782	0.780447
Aven	-1.14588	0.696326	0.449552
awd	-0.805912	-0.313201	1.11911
Awh	-1.14961	0.668588	0.481023
axed	0.493615	0.657216	-1.15083
Axn	-0.790625	1.12414	-0.333511
Axs	-1.004	0.00805385	0.995949
Axud1	-0.569654	-0.585012	1.15467
az2	0.86257	0.233531	-1.0961
b	0.31397	0.805339	-1.11931
B-H2	0	0	0
B4	-0.729197	-0.410775	1.13997
B52	-0.203958	-0.882298	1.08626
B9d1	-0.93745	-0.115133	1.05258
bab1	0.802013	0.318425	-1.12044
bab2	0	0	0
babo	-1.15368	0.618832	0.53485
babos	-0.57735	-0.57735	1.1547
Bacc	-0.336539	-0.788316	1.12486
baf	-1.00583	0.0117611	0.994068
bai	-0.995405	-0.0091278	1.00453
Balat	-0.702071	-0.442893	1.14496
Baldspot	-0.493607	-0.657223	1.15083
ball	-0.419889	-0.721597	1.14149
bam	0.576431	0.578269	-1.1547
Bap111	0.677798	0.470695	-1.14849
Bap170	0.641376	0.510863	-1.15224
Bap55	0.936103	-1.05353	0.117426
Bap60	0.392998	0.743801	-1.1368
barc	-0.610631	-0.543417	1.15405
bark	-0.57735	1.1547	-0.57735
barr	0.43702	0.707104	-1.14412
baz	0.908092	0.163633	-1.07172
bb8	-0.255585	-0.847403	1.10299
bbc	-0.385684	-0.749727	1.13541
bbg	-0.688795	-0.458206	1.147
BBIP1	0.809548	0.3083	-1.11785
BBS8	-0.57735	-0.57735	1.1547
bbx	0.327698	0.795036	-1.12273
bc10	1.09795	-0.239318	-0.858628
BCAS2	-0.817335	-0.297712	1.11505
bchs	0.946837	0.0989659	-1.0458
BCL7-like	0.206333	0.880739	-1.08707
bcn92	-0.667543	-0.482188	1.14973
Bdbt	-0.398714	-0.739137	1.13785
bdg	0.0964773	-1.04474	0.948265
bdl	-0.57735	1.1547	-0.57735
Bdp1	1.06542	-0.147142	-0.918277
be	-0.0505671	-0.973757	1.02432
BEAF-32	-0.251745	-0.850072	1.10182
beag	0.379397	0.754782	-1.13418
beat-Ib	-0.57735	-0.57735	1.1547
beat-Ic	-0.57735	-0.57735	1.1547
beat-IIIc	-0.57735	-0.57735	1.1547
beat-VI	-1.13991	0.41039	0.729516
beat-VII	-1.0856	0.883549	0.202047
beg	-0.647542	1.15173	-0.504188
bel	-0.746389	-0.389812	1.1362
Bem46	-0.879334	-0.208469	1.0878
ben	0.530731	0.622746	-1.15348
Best1	-0.59329	-0.561263	1.15455
Best2	-0.57735	-0.57735	1.1547
Bet1	0.0931671	-1.04332	0.950156
Bet3	0.229498	0.865301	-1.0948
Bet5	-1.01689	0.0346747	0.982212
beta-Man	0.766397	0.364783	-1.13118
beta-PheRS	-0.624468	1.15338	-0.528914
beta-Spec	0.829619	0.280748	-1.11037
beta'COP	0.648793	0.502829	-1.15162
beta3GalTII	-0.451812	-0.694365	1.14618
beta4GalNAcTA	0.0122525	0.993817	-1.00607
beta4GalNAcTB	1.12716	-0.780676	-0.346486
beta4GalT7	0.270877	0.836657	-1.10753
betaCOP	0.778833	0.348868	-1.1277
betaggt-I	-0.597125	-0.557347	1.15447
betaggt-II	0.797091	0.324977	-1.12207
betaGlu	0.592335	0.562235	-1.15457
betaTub56D	-0.0382534	-0.980324	1.01858
betaTub60D	-0.869222	-0.223675	1.0929
betaTub85D	-0.465391	-0.682486	1.14788
betaTub97EF	-0.469996	-0.678418	1.14841
Bgb	0.83782	0.269235	-1.10705
bgcn	0.59588	-1.1545	0.55862
bgm	-0.558482	-0.596016	1.1545
BHD	-0.085277	1.03991	-0.954631
bi	-0.57735	-0.57735	1.1547
BI-1	-0.0487227	1.02347	-0.974748
bib	1.0929	-0.869207	-0.223696
bic	-0.596459	-0.558028	1.15449
BicD	-0.5991	-0.555324	1.15442
bif	-0.422982	-0.719	1.14198
BigH1	-0.57735	-0.57735	1.1547
bigmax	-1.06103	0.135988	0.925047
Bin1	-0.957566	-0.0800558	1.03762
bin3	-0.551833	-0.602497	1.15433
bip1	-0.0641773	-0.966366	1.03054
bip2	-0.466031	-0.681922	1.14795
Bka	-0.774429	-0.354536	1.12897
blanks	-0.990687	-0.0183723	1.00906
Blimp-1	-0.805622	1.11921	-0.313589
Blm	0.844245	0.260108	-1.10435
Blos1	-0.639108	-0.513305	1.15241
Blos2	-1.03108	0.965717	0.06536
Blos3	-1.08221	0.192382	0.889833
Blos4	-0.28615	1.11188	-0.825733
blot	-0.673847	-0.475141	1.14899
blow	0.778224	0.349654	-1.12788
blp	-1.00676	0.0136683	0.993096
blw	-0.590159	-0.564446	1.15461
bma	-0.0746367	1.03523	-0.96059
Bmcp	-1.14605	0.450815	0.69523
bmm	-0.821194	-0.292418	1.11361
bnb	-0.57735	1.1547	-0.57735
bnl	-1.10191	0.849856	0.252057
boca	-0.750024	-0.385316	1.13534
bocks	0.508019	0.644009	-1.15203
BOD1	0.568769	0.585889	-1.15466
boi	0.968718	0.0598733	-1.02859
bol	-0.711075	-0.432358	1.14343
Bom1	-0.57735	1.1547	-0.57735
Bom3	-0.57735	1.1547	-0.57735
bon	0.510393	0.641812	-1.1522
bond	-0.57735	1.1547	-0.57735
bonsai	-1.15273	0.634828	0.517897
bor	-0.117195	-0.936239	1.05343
bora	0.146627	0.918591	-1.06522
BORCS5	1.00449	-0.00903288	-0.995453
BORCS6	0.941068	0.108942	-1.05001
BORCS7	-0.999357	-0.00128499	1.00064
borr	0.810006	0.30768	-1.11769
botv	0.787919	0.337059	-1.12498
bou	0.856249	-1.09904	0.242792
bowl	1.14941	-0.670327	-0.479082
BoYb	0.484872	0.665129	-1.15
br	0.593506	0.561042	-1.15455
Br140	0.45752	0.689394	-1.14691
brat	-0.828767	-0.281935	1.1107
Brca2	0.324684	0.797312	-1.122
Brd	-0.57735	-0.57735	1.1547
Brd8	0.664993	0.485023	-1.15002
Bre1	0.116638	0.936566	-1.0532
Brf	0.676278	0.472407	-1.14869
brk	-0.933216	-0.122315	1.05553
brm	0.774659	0.354242	-1.1289
Brms1	-1.153	0.630803	0.522194
brn	-0.515993	-0.636606	1.1526
brp	-0.965972	1.03087	-0.0648957
bru1	1.1547	-0.57735	-0.57735
bru2	0	0	0
bru3	0.862583	0.233511	-1.09609
Bruce	0.457608	0.689317	-1.14692
brun	0.775737	0.352857	-1.12859
brv3	1.1547	-0.57735	-0.57735
BRWD3	0.964342	-1.0322	0.0678588
brwl	1.15454	-0.594198	-0.560337
bs	0.933384	0.122032	-1.05542
bsf	0.366574	0.764984	-1.13156
Bsg	0.380559	0.753851	-1.13441
Bsg25D	-0.499553	1.15135	-0.651797
bsk	0.989522	-1.01016	0.0206364
bt	0.707217	0.436887	-1.1441
BTBD9	0.403592	0.735133	-1.13872
BtbVII	0.4178	0.723346	-1.14115
btd	1.15402	-0.611332	-0.542688
BthD	0.0210413	-1.01035	0.989313
Btk29A	0.484541	0.665427	-1.14997
btl	0.592006	0.562569	-1.15458
btsz	-0.19235	1.0822	-0.889853
btz	0.0870671	0.95362	-1.04069
Bub1	0.833255	0.275661	-1.10892
Bub3	-1.05846	0.12954	0.928917
BubR1	0.695436	0.450577	-1.14601
bug	-0.482952	1.14981	-0.666856
Bug22	-0.629519	-0.523559	1.15308
BuGZ	0.682069	0.465865	-1.14793
bun	0.938268	-1.05201	0.113738
bur	-0.532376	-0.621185	1.15356
bves	-1.0957	0.863415	0.232286
bw	0.127222	0.930301	-1.05752
bwa	0.989008	0.0216331	-1.01064
Bx	0.524183	0.628932	-1.15312
Bx42	0.0406648	0.979047	-1.01971
by	0.916486	0.150066	-1.06655
bys	0.808427	0.309813	-1.11824
c(2)M	0.888662	0.194191	-1.08285
c(3)G	-0.521738	-0.631231	1.15297
c11.1	0.643155	0.508943	-1.1521
c12.1	-1.11031	0.280563	0.829751
c12.2	0.529034	0.624354	-1.15339
C1GalTA	0.268895	0.83806	-1.10696
C3G	0.366301	0.765199	-1.1315
ca	0.987372	0.0247951	-1.01217
Ca-alpha1D	-0.57735	1.1547	-0.57735
Ca-alpha1T	-0.701107	-0.444014	1.14512
Ca-Ma2d	-0.57735	-0.57735	1.1547
CaBP1	-0.372888	-0.759979	1.13287
cac	1.1499	-0.483874	-0.666028
cact	-0.629371	-0.523717	1.15309
cactin	-1.15111	0.654334	0.496777
Cad86C	-0.451404	-0.69472	1.14612
Cad87A	0.0991764	0.946717	-1.04589
Cad96Ca	-0.57735	-0.57735	1.1547
Cad99C	-0.620597	-0.532995	1.15359
CadN	-0.57735	-0.57735	1.1547
CadN2	0.814277	0.301885	-1.11616
Cadps	0.69064	0.456092	-1.14673
Caf1-105	-0.136262	1.06114	-0.924882
Caf1-180	-0.851136	-0.25021	1.10135
Caf1-55	0.575698	0.579001	-1.1547
cag	-0.513742	-0.638702	1.15244
CAH1	-0.838288	1.10686	-0.268573
CAH13	1.13553	-0.386281	-0.749245
CAH2	-0.101577	1.04691	-0.945335
CAH3	0.94325	0.105184	-1.04843
CAH7	1.14933	-0.670984	-0.478348
CAHbeta	0.869293	0.223569	-1.09286
cal1	1.15054	-0.660115	-0.490422
CalpA	0.679218	0.469092	-1.14831
CalpB	-0.166616	1.07284	-0.906227
CalpC	-0.893998	1.07991	-0.185912
Calr	0.559285	0.595229	-1.15451
Cals	0.919853	0.144559	-1.06441
Calx	0.772892	0.356506	-1.1294
calypso	0.693947	0.452293	-1.14624
Cam	-0.0105814	-0.994667	1.00525
CaMKI	-1.01741	0.0357808	0.981629
CaMKII	-0.540288	-0.613636	1.15392
Camp	0.132764	0.926986	-1.05975
Camta	1.15141	-0.500257	-0.651152
can	-0.57735	-0.57735	1.1547
cana	1.08672	-0.205309	-0.881412
CanA-14F	0.75884	0.374318	-1.13316
CanB	0	0	0
CanB2	-0.0437745	1.02117	-0.977394
Cand1	-1.11661	0.813021	0.303594
CAP	-0.562578	-0.591997	1.15458
Cap-D2	0.785331	0.340438	-1.12577
Cap-D3	0.668087	0.481582	-1.14967
Cap-G	0.590741	0.563856	-1.1546
Cap-H2	0.71276	0.430373	-1.14313
Caper	-0.14578	1.06489	-0.919109
Capr	0.327211	0.795404	-1.12262
caps	0.98015	0.0385834	-1.01873
capt	0.121649	0.933611	-1.05526
capu	-0.619356	-0.534299	1.15366
car	0.382436	0.752343	-1.13478
CARPB	0.608701	0.545421	-1.15412
CarT	-0.606919	1.15419	-0.547268
CASK	0.681118	0.466943	-1.14806
casp	0.979936	-1.01892	0.0389881
cass	0.615153	0.538704	-1.15386
Cat	0.701677	0.443351	-1.14503
cathD	0.558158	0.596332	-1.15449
Catsup	0.508125	0.643911	-1.15204
caup	0	0	0
cav	-0.521812	-0.631162	1.15297
caz	0.375308	0.758051	-1.13336
cbc	-0.476979	-0.672207	1.14919
Cbl	0.832635	0.276531	-1.10917
CBP	0.468612	0.679642	-1.14825
Cbp20	-0.950021	-0.0934038	1.04342
Cbp53E	-0.57735	-0.57735	1.1547
Cbp80	0.774934	0.353888	-1.12882
cbs	0.757441	0.376073	-1.13351
Cbs	0.574059	0.580635	-1.15469
cbt	1.10002	-0.245911	-0.854105
Cby	-0.888543	-0.194375	1.08292
Cc2d2a	1.15294	-0.521341	-0.631604
CCAP	1.08082	-0.188463	-0.892359
CCDC53	0.185648	0.894167	-1.07981
Ccdc56	-0.550301	-0.603983	1.15428
Ccdc58	-0.736866	-0.401484	1.13835
Ccdc85	-1.145	0.44313	0.701867
CCHa2	-0.954749	1.03982	-0.0850664
Cchl	-0.443677	-0.701397	1.14507
Ccm3	-0.921072	-0.142556	1.06363
Ccs	0.111314	0.939686	-1.051
CCT1	0.609273	0.544828	-1.1541
CCT2	-0.571945	-0.582739	1.15468
CCT3	0.580313	0.574383	-1.1547
CCT4	-0.740524	-0.397017	1.13754
CCT5	0.488555	0.661805	-1.15036
CCT6	0.598611	0.555825	-1.15444
CCT7	0.568664	0.585993	-1.15466
CCT8	1.13427	-0.754399	-0.379874
Ccz1	0.29665	0.818111	-1.11476
cd	-1.02969	0.0622872	0.9674
CD98hc	0.218861	-1.0913	0.872443
Cda5	-0.757581	1.13348	-0.375897
CDase	0.84356	0.261085	-1.10465
cdc14	0.641513	0.510716	-1.15223
Cdc16	1.14014	-0.411783	-0.72836
Cdc23	0.906357	0.166409	-1.07277
Cdc27	0.709198	0.434564	-1.14376
Cdc2rk	0.378091	0.755828	-1.13392
Cdc37	-0.984203	-0.0308796	1.01508
Cdc42	0.621465	0.532082	-1.15355
CDC45L	0.407427	0.731969	-1.1394
Cdc5	0.755531	0.378462	-1.13399
CDC50	0.423387	0.71866	-1.14205
Cdc6	0.0190674	0.99033	-1.0094
Cdc7	0.947695	0.0974723	-1.04517
Cdep	0.336073	0.788672	-1.12474
CdGAPr	0.0867622	0.953792	-1.04055
cdi	-0.520463	1.15289	-0.632426
cDIP	-1.01563	0.0320278	0.983601
Cdk1	-0.897434	-0.180537	1.07797
Cdk12	-0.212111	1.08904	-0.876928
Cdk2	0.462176	0.685315	-1.14749
CDK2AP1	1.0718	-0.163841	-0.907962
Cdk4	1.08698	-0.206066	-0.880915
Cdk5	-0.762569	-0.369625	1.13219
Cdk5alpha	-1.15468	0.571577	0.583104
Cdk7	-1.15059	0.491026	0.659568
Cdk8	0.689882	0.456961	-1.14684
Cdk9	0.496647	0.654454	-1.1511
Cdlc2	0.904986	-1.07358	0.168595
cdm	0.67867	0.469711	-1.14838
Cds	0.673053	0.476031	-1.14908
Cec2	0	0	0
CecA1	-0.589481	-0.565134	1.15461
CecA2	-0.584626	-0.570044	1.15467
CecB	-0.583121	-0.57156	1.15468
CecC	-0.890444	-0.191436	1.08188
Ced-12	0.590126	0.56448	-1.15461
ced-6	0.874973	0.215059	-1.09003
Cen	0.685642	0.461804	-1.14745
CenB1A	0.889845	0.192362	-1.08221
CenG1A	-0.550178	-0.604102	1.15428
Cenp-C	0.491964	0.658716	-1.15068
Cep135	-1.13525	0.384877	0.750378
cep290	-0.57735	-0.57735	1.1547
Cep89	-0.57735	-0.57735	1.1547
Cep97	-0.793585	-0.329614	1.1232
cer	-0.144919	1.06455	-0.919633
Cerk	-0.247722	-0.852856	1.10058
cert	1.06414	-0.143855	-0.920282
cerv	-0.289036	-0.823647	1.11268
Cf2	0.718595	0.423464	-1.14206
Cfp1	-0.815425	-0.300321	1.11575
cg	-0.699781	1.14533	-0.445553
CG10005	-0.696494	-0.449357	1.14585
CG10011	0.695832	0.450121	-1.14595
CG10026	0.789752	0.334657	-1.12441
CG10031	-0.57735	-0.57735	1.1547
CG10038	-0.809064	1.11802	-0.308953
CG10041	1.14905	-0.673373	-0.475673
CG10050	0.716413	-1.14247	0.426053
CG10053	-0.935052	1.05426	-0.119209
CG10055	-0.416796	-0.724185	1.14098
CG10063	0.861981	0.234398	-1.09638
CG10064	-1.15113	0.654139	0.496992
CG10068	0.618076	0.535643	-1.15372
CG10075	0.211507	-1.08883	0.877327
CG10077	0.682399	0.46549	-1.14789
CG10082	-0.0133614	-0.993252	1.00661
CG10086	0	0	0
CG10089	0	0	0
CG10096	-0.914167	-0.153837	1.068
CG10098	-0.226958	-0.867015	1.09397
CG10103	-0.524182	-0.628934	1.15312
CG10126	-0.112237	1.05138	-0.939147
CG10132	0.784649	0.341326	-1.12598
CG10137	0.987511	0.0245262	-1.01204
CG10139	-0.939044	-0.112413	1.05146
CG10147	-1.15466	0.585813	0.568846
CG10151	-0.88951	-0.19288	1.08239
CG10165	-0.596518	-0.557968	1.15449
CG10166	-1.0155	0.983738	0.0317665
CG10171	0.495151	0.655818	-1.15097
CG10184	-0.662686	-0.48758	1.15027
CG10185	-0.57735	1.1547	-0.57735
CG10188	0.693003	0.45338	-1.14638
CG10189	0.770396	-1.13009	0.359697
CG10194	-1.04311	0.950442	0.0926659
CG10195	-0.765993	-0.365295	1.13129
CG10208	1.14681	-0.690114	-0.456695
CG10209	0.388155	0.74773	-1.13589
CG10214	-0.484394	-0.665559	1.14995
CG10222	-0.847299	-0.255734	1.10303
CG10232	-0.651713	-0.499645	1.15136
CG10237	-0.57735	1.1547	-0.57735
CG1024	1.02034	-0.0420048	-0.978336
CG10252	0.984248	0.0307932	-1.01504
CG10254	0.17549	-1.07613	0.900639
CG10265	1.01472	-0.984598	-0.0301228
CG10268	0.901014	0.174897	-1.07591
CG10274	0.876412	0.21289	-1.0893
CG10283	-0.625234	-0.528104	1.15334
CG10286	0.37316	-1.13292	0.759762
CG10307	-0.57735	1.1547	-0.57735
CG10311	0.746286	0.389938	-1.13622
CG10321	0.735247	0.403453	-1.1387
CG10324	-0.515653	-0.636923	1.15258
CG10333	-0.793462	-0.329777	1.12324
CG10336	1.15385	-0.538527	-0.615322
CG10337	0.72163	0.41985	-1.14148
CG10338	0.218515	0.872673	-1.09119
CG10340	-0.658303	-0.492419	1.15072
CG10341	-0.796486	1.12226	-0.325779
CG10343	-0.901972	-0.173382	1.07535
CG10344	0.600259	0.554135	-1.15439
CG10347	-0.0499655	-0.974081	1.02405
CG10353	-1.08588	0.202867	0.883012
CG10359	0.170036	0.90408	-1.07412
CG10361	-0.57735	-0.57735	1.1547
CG10365	0.347967	0.77953	-1.1275
CG10366	0.0136486	0.993106	-1.00675
CG10375	-0.804697	-0.314832	1.11953
CG10376	-0.689256	-0.457678	1.14693
CG10383	-0.425541	-0.716846	1.14239
CG10384	-0.815863	1.11559	-0.299724
CG10395	-0.72038	-0.421341	1.14172
CG10405	-0.0986108	-0.947041	1.04565
CG10407	0.890531	0.191299	-1.08183
CG10413	0.567114	0.587527	-1.15464
CG10417	0.0825651	-1.03872	0.956158
CG10418	-0.987389	-0.024762	1.01215
CG10425	0.540107	0.613809	-1.15392
CG10428	-1.15214	0.509483	0.642655
CG10431	0.469871	0.678528	-1.1484
CG10433	-0.617729	-0.536007	1.15374
CG10435	-0.833711	-0.275022	1.10873
CG10444	-0.0158887	1.00785	-0.991961
CG10445	-0.680669	-0.467451	1.14812
CG10462	-0.447009	-0.698524	1.14553
CG10463	-0.788583	-0.33619	1.12477
CG10465	0.768865	-1.13051	0.361648
CG10466	-0.503885	-0.647822	1.15171
CG10467	-0.925892	1.06048	-0.134584
CG10469	0.120004	0.934583	-1.05459
CG10470	-1.15437	0.553251	0.601118
CG10472	1.13939	-0.407393	-0.731998
CG10492	0.811744	0.305327	-1.11707
CG10494	1.03448	-0.0729567	-0.961524
CG10495	-0.443434	1.14504	-0.701606
CG10505	0.997046	0.00588188	-1.00293
CG10508	0.878614	0.209559	-1.08817
CG10512	-0.150492	-0.916225	1.06672
CG10516	-0.0266067	-0.986431	1.01304
CG10527	-0.522455	-0.630557	1.15301
CG10543	0.590773	0.563822	-1.1546
CG10550	-0.57735	1.1547	-0.57735
CG10555	0.970335	0.0568994	-1.02723
CG10561	0.95334	0.0875623	-1.0409
CG10565	0.15719	0.912096	-1.06929
CG10576	-0.584202	-0.570472	1.15467
CG10581	0.466088	0.681872	-1.14796
CG10584	0.674811	0.474057	-1.14887
CG10589	-0.57735	1.1547	-0.57735
CG10600	-1.06344	0.142068	0.921368
CG10602	0.409737	-1.13979	0.730058
CG10616	0.933122	0.122474	-1.0556
CG10621	-0.408505	-0.731078	1.13958
CG10623	0.57376	0.580933	-1.15469
CG10628	0.83093	0.278917	-1.10985
CG10631	0.740565	0.396967	-1.13753
CG10638	0.315654	0.804083	-1.11974
CG10646	-1.15343	0.623613	0.529817
CG10650	-1.14767	0.463612	0.684053
CG10654	0.845992	0.257608	-1.1036
CG10657	-1.09056	0.216619	0.873936
CG10660	1.00692	-0.0139805	-0.992936
CG10663	-0.243741	1.09934	-0.855597
CG10669	1.14993	-0.665727	-0.484207
CG10672	-1.07214	0.907398	0.164743
CG10674	-1.15124	0.498269	0.652972
CG10681	0.617922	-1.15373	0.535805
CG10694	-1.01831	0.98062	0.0376949
CG10702	0.995068	0.0097915	-1.00486
CG10730	-0.57735	1.1547	-0.57735
CG10731	-1.02192	0.976534	0.0453863
CG10734	-0.805316	-0.314001	1.11932
CG10737	-0.252357	-0.849648	1.102
CG10738	-0.57735	1.1547	-0.57735
CG1074	-0.203222	-0.88278	1.086
CG10747	0.524766	0.628384	-1.15315
CG10764	-0.610128	1.15407	-0.54394
CG1077	0	0	0
CG10778	0.335506	-1.12461	0.789105
CG10795	0.620643	0.532947	-1.15359
CG10799	0	0	0
CG10801	-0.57735	-0.57735	1.1547
CG10802	1.07335	-0.167966	-0.905381
CG10803	0.517688	0.635024	-1.15271
CG10804	0	0	0
CG10809	-0.577647	-0.577054	1.1547
CG10814	0.100094	0.946189	-1.04628
CG10822	-0.57735	1.1547	-0.57735
CG10841	-1.07606	0.90075	0.175315
CG10859	0.523811	0.629283	-1.15309
CG10862	0	0	0
CG10863	-0.643059	-0.509046	1.15211
CG10866	0.989304	0.0210588	-1.01036
CG10869	1.11002	-0.279531	-0.83049
CG10874	0.939516	0.111604	-1.05112
CG10877	0.594004	0.560535	-1.15454
CG10889	0.00709405	0.996434	-1.00353
CG10898	-0.984688	1.01464	-0.0299505
CG1090	0.982419	0.0342813	-1.0167
CG10903	-0.704375	-0.440209	1.14458
CG10904	-0.806611	1.11887	-0.31226
CG10907	-0.50624	-0.645652	1.15189
CG10914	0.963618	0.0691728	-1.03279
CG10916	0.422826	0.719132	-1.14196
CG1092	0.328763	0.79423	-1.12299
CG10927	-0.631988	1.15292	-0.520931
CG10931	0	0	0
CG10932	0.341639	0.784409	-1.12605
CG10936	-0.57735	1.1547	-0.57735
CG10939	0.688328	0.458739	-1.14707
CG10947	-0.684504	-0.463099	1.1476
CG10948	0.428352	-1.14282	0.714471
CG10949	-0.722498	-0.418813	1.14131
CG10958	-0.715949	-0.426603	1.14255
CG10959	0.652076	0.499249	-1.15132
CG10960	-0.640585	-0.511716	1.1523
CG10962	0.533935	0.619703	-1.15364
CG10970	0.724755	0.416113	-1.14087
CG10973	-0.358458	-0.771366	1.12982
CG10979	0.719052	0.422921	-1.14197
CG10984	-0.758234	1.13331	-0.375078
CG11000	-0.642768	1.15213	-0.509361
CG11007	-0.621662	-0.531874	1.15354
CG1103	0.449277	0.696563	-1.14584
CG11030	-0.588541	-0.566087	1.15463
CG11034	-0.57735	-0.57735	1.1547
CG11035	0.269064	0.837941	-1.107
CG1105	-1.08206	0.890107	0.191956
CG11050	-0.679571	-0.468693	1.14826
CG11052	-1.06455	0.144914	0.919637
CG11068	-0.57735	1.1547	-0.57735
CG11069	-0.57735	-0.57735	1.1547
CG11070	0.865267	0.229548	-1.09482
CG11076	-0.377719	-0.756125	1.13384
CG11077	-1.13375	0.377248	0.756502
CG11089	-0.376259	1.13355	-0.757292
CG11095	1.10473	-0.843372	-0.261353
CG11103	0.551668	0.602657	-1.15433
CG11106	-0.57735	1.1547	-0.57735
CG11109	0.548795	-1.15424	0.605442
CG11110	-0.313802	-0.805464	1.11927
CG11122	0.290854	0.82233	-1.11318
CG11123	0.279435	0.830559	-1.10999
CG11125	1.13668	-0.392387	-0.744298
CG11127	-0.362157	-0.768464	1.13062
CG11134	-0.54077	-0.613173	1.15394
CG11137	-1.04289	0.092152	0.950734
CG11141	0.685065	-1.14753	0.462461
CG11151	-0.914117	1.06804	-0.153919
CG11155	1.12647	-0.343462	-0.783007
CG11158	-0.469826	-0.678568	1.14839
CG1116	0.334848	-1.12445	0.789607
CG11164	0.251278	0.850396	-1.10167
CG11168	0.763572	0.368359	-1.13193
CG11170	-0.194436	1.08294	-0.888503
CG11178	-0.994373	-0.0111608	1.00553
CG11180	-0.6076	-0.546563	1.15416
CG11200	-0.00405568	1.00202	-0.997966
CG11236	-0.57735	-0.57735	1.1547
CG1124	-0.16217	1.07117	-0.909004
CG11241	-0.357933	1.12971	-0.771777
CG11247	-0.0458022	-0.976312	1.02211
CG11248	0.282607	0.828284	-1.11089
CG11249	1.06003	-0.133465	-0.926565
CG11257	0.577702	0.576999	-1.1547
CG11267	-0.740433	-0.397129	1.13756
CG11275	-0.57735	-0.57735	1.1547
CG11279	-1.15313	0.524354	0.628772
CG1129	-0.426969	-0.715641	1.14261
CG11291	-0.57735	1.1547	-0.57735
CG11294	0.445093	0.700178	-1.14527
CG11307	-0.466477	-0.681529	1.14801
CG11309	0.569842	0.584827	-1.15467
CG11313	-0.939928	1.05083	-0.110898
CG11318	-0.57735	-0.57735	1.1547
CG11319	-0.57735	-0.57735	1.1547
CG11322	-0.916273	1.06669	-0.150413
CG11327	-0.57735	1.1547	-0.57735
CG11334	-0.377909	-0.755973	1.13388
CG11342	-1.13392	0.378088	0.75583
CG11350	0.814824	0.301141	-1.11596
CG11353	-0.57735	-0.57735	1.1547
CG11357	0.301194	-1.11598	0.814784
CG1136	-0.57735	-0.57735	1.1547
CG11360	0.476199	0.672904	-1.1491
CG11362	-0.773486	-0.355745	1.12923
CG11367	0.724046	0.416962	-1.14101
CG1137	-0.57735	-0.57735	1.1547
CG11373	0	0	0
CG11374	0.0479769	0.975148	-1.02312
CG11377	0.660962	0.489487	-1.15045
CG11378	-0.57735	1.1547	-0.57735
CG11396	-0.88437	-0.200791	1.08516
CG11398	-0.952165	1.0418	-0.0896351
CG11399	0.728867	0.411173	-1.14004
CG11400	-0.752073	-0.382772	1.13484
CG11403	0.989681	0.0203285	-1.01001
CG11406	0.796103	0.326286	-1.12239
CG11413	0.616154	0.537657	-1.15381
CG11414	0.969906	0.0576908	-1.0276
CG11417	-0.648208	-0.503464	1.15167
CG1142	-0.638419	-0.514046	1.15247
CG11426	-0.57735	-0.57735	1.1547
CG1143	-1.00893	0.990825	0.0181038
CG11436	0.437115	0.707022	-1.14414
CG11438	0	0	0
CG11444	-0.466222	-0.681754	1.14798
CG11447	0.0249878	-1.01226	0.987272
CG11454	-1.14371	0.709497	0.434213
CG11456	-0.970369	-0.0568378	1.02721
CG1146	-0.812303	-0.304569	1.11687
CG11474	0.640925	0.51135	-1.15227
CG11475	1.09961	-0.244601	-0.855006
CG11486	-0.0775508	-0.958967	1.03652
CG11504	0.78294	0.34355	-1.12649
CG11523	0.784245	0.341852	-1.1261
CG11537	-0.749854	-0.385526	1.13538
CG11539	-1.01033	0.0209831	0.989343
CG11555	-0.906744	-0.16579	1.07253
CG11560	-0.221361	-0.870772	1.09213
CG11562	-0.781551	-0.345351	1.1269
CG11563	-0.876238	-0.213154	1.08939
CG11583	-0.773558	-0.355654	1.12921
CG11586	0.822022	0.291278	-1.1133
CG11590	0.587217	0.567427	-1.15464
CG11593	-0.800446	-0.320516	1.12096
CG11594	1.03107	-0.0653445	-0.965725
CG11596	-0.43621	-0.707794	1.144
CG11597	-0.160585	1.07057	-0.90999
CG11598	-0.697341	1.14572	-0.448379
CG11601	-0.612383	-0.541594	1.15398
CG1161	0.969773	0.0579342	-1.02771
CG11619	-1.08227	0.889733	0.192536
CG11638	-0.337202	-0.78781	1.12501
CG11655	0.752742	0.381939	-1.13468
CG11656	-0.57735	1.1547	-0.57735
CG11658	1.13758	-0.740331	-0.397254
CG11663	0	0	0
CG11674	1.11806	-0.309128	-0.808934
CG11679	-0.217272	-0.873502	1.09077
CG11686	-0.808274	-0.31002	1.11829
CG11695	0.436824	-1.14409	0.707271
CG11696	0.389729	0.746455	-1.13618
CG11699	1.04804	-0.104249	-0.943792
CG11700	-0.0629986	-0.967011	1.03001
CG11710	0.295055	-1.11433	0.819275
CG1172	0.713125	-1.14307	0.429943
CG11722	-1.10714	0.837617	0.269521
CG11723	-0.174288	1.07569	-0.901399
CG11737	0.345204	0.781665	-1.12687
CG11752	-1.00368	0.00739447	0.996282
CG11753	-1.03506	0.0742523	0.960804
CG11755	-0.0656526	1.03121	-0.965556
CG11756	0.836316	-1.10767	0.271358
CG11760	0.727738	0.412532	-1.14027
CG11768	0.865985	0.228485	-1.09447
CG11771	0.131201	0.927923	-1.05912
CG11777	-0.611399	-0.542619	1.15402
CG11779	0.307543	0.810108	-1.11765
CG11781	-0.589008	1.15462	-0.565614
CG11786	-1.05749	0.127146	0.930346
CG11788	-1.14074	0.72542	0.415316
CG11790	-0.622358	-0.531141	1.1535
CG11791	-0.489719	-0.660752	1.15047
CG11807	0.700443	0.444784	-1.14523
CG11808	-0.564901	-0.589711	1.15461
CG11811	-0.861811	-0.234648	1.09646
CG11815	-0.57735	-0.57735	1.1547
CG11825	-0.523493	1.15307	-0.629582
CG11835	1.12262	-0.795383	-0.327239
CG11836	-0.634449	1.15275	-0.518303
CG11837	-1.05999	0.133369	0.926623
CG11839	-1.11174	0.285653	0.826091
CG11842	-0.57735	1.1547	-0.57735
CG11852	-0.57735	1.1547	-0.57735
CG11854	0.98911	0.0214354	-1.01055
CG11857	-0.687143	-0.460093	1.14724
CG11858	-1.05149	0.112504	0.93899
CG11873	-0.566938	-0.587701	1.15464
CG11882	0.754191	0.380134	-1.13433
CG11883	-0.779161	-0.348444	1.12761
CG11885	-0.957455	1.03771	-0.0802537
CG11893	0.780317	0.346951	-1.12727
CG11899	0.445882	0.699497	-1.14538
CG11902	0.699207	0.446218	-1.14543
CG11906	0.836684	0.270838	-1.10752
CG11911	-0.57735	1.1547	-0.57735
CG11920	-0.900532	-0.175659	1.07619
CG11927	0.919735	0.144752	-1.06449
CG11929	0.219784	0.871827	-1.09161
CG11961	0.728388	0.411749	-1.14014
CG11964	-0.701769	-0.443244	1.14501
CG11970	0.884695	0.200293	-1.08499
CG11975	0.787385	0.337757	-1.12514
CG11980	-0.946828	-0.0989832	1.04581
CG11983	0.929419	0.128701	-1.05812
CG11986	0.9461	0.100248	-1.04635
CG11999	-0.763496	-0.368455	1.13195
CG12003	-0.57735	1.1547	-0.57735
CG12004	-1.07537	0.173438	0.901937
CG12007	-0.883612	-0.20195	1.08556
CG12010	-0.0647229	1.03079	-0.966066
CG12012	0.144461	-1.06437	0.919913
CG12016	0.526479	0.626769	-1.15325
CG12024	-0.364544	-0.766586	1.13113
CG12025	1.14841	-0.67843	-0.469982
CG12054	0.695171	-1.14605	0.450883
CG12056	0.977424	0.0437183	-1.02114
CG12065	0.654858	0.496203	-1.15106
CG12071	-0.420385	-0.721181	1.14157
CG12075	-0.442398	1.14489	-0.702496
CG1208	-1.09515	0.230577	0.864572
CG12081	0.977987	0.0426598	-1.02065
CG12084	-1.10922	0.27671	0.832507
CG12091	1.08869	-0.877608	-0.211083
CG12093	0.579476	0.575222	-1.1547
CG12096	-0.0326938	-0.983252	1.01595
CG12099	0.792576	0.330945	-1.12352
CG12104	-0.194996	1.08314	-0.88814
CG12105	-0.660995	-0.48945	1.15045
CG12106	0.561311	0.593242	-1.15455
CG12107	-0.68891	-0.458074	1.14698
CG12112	-0.520348	-0.632535	1.15288
CG12116	-0.186573	1.08015	-0.893573
CG12118	0.983648	-1.01559	0.0319394
CG12121	0.818343	0.296333	-1.11468
CG12123	0.7731	0.356241	-1.12934
CG12126	1.1547	-0.57735	-0.57735
CG12128	0.341873	0.784229	-1.1261
CG12129	-0.719465	-0.42243	1.14189
CG1213	-0.57735	-0.57735	1.1547
CG12133	-0.580931	-0.573762	1.15469
CG12134	-1.0901	0.215265	0.874837
CG12155	-0.518617	1.15277	-0.634155
CG12159	0.949464	0.0943799	-1.04384
CG12163	-1.12055	0.801688	0.318859
CG12170	-0.911266	1.0698	-0.15853
CG12171	0.894287	0.18546	-1.07975
CG12173	-0.743233	-0.393696	1.13693
CG12177	0.601488	0.552872	-1.15436
CG12179	0.920847	0.142925	-1.06377
CG1218	0.68659	0.460724	-1.14731
CG12182	1.08191	-0.19151	-0.890395
CG12184	0.262498	0.842569	-1.10507
CG12194	1.09327	-0.22482	-0.868453
CG12204	0.0149738	0.992429	-1.0074
CG12206	-0.209613	1.08819	-0.878579
CG12209	-0.57735	-0.57735	1.1547
CG12213	0.540209	0.613712	-1.15392
CG12219	-1.03046	0.966466	0.0639943
CG12224	-0.58867	-0.565956	1.15463
CG12236	1.0047	-0.00947594	-0.995228
CG12237	0.675914	0.472818	-1.14873
CG12241	0.691857	0.454697	-1.14655
CG12253	-1.01877	0.980112	0.0386545
CG12259	-0.671901	-0.477322	1.14922
CG12267	-0.580527	-0.574168	1.15469
CG1227	-1.06697	0.15114	0.915826
CG12279	-1.02266	0.0469804	0.975682
CG12288	-0.700922	-0.444229	1.14515
CG12290	-1.00294	0.00591417	0.99703
CG12299	0.447317	0.698258	-1.14558
CG12301	-0.859658	-0.23781	1.09747
CG12316	-0.262819	1.10516	-0.842343
CG12320	-0.831181	-0.278566	1.10975
CG12321	-0.695301	1.14603	-0.450733
CG12325	-0.982384	-0.0343464	1.01673
CG1233	0.684403	0.463214	-1.14762
CG12333	0.801637	0.318928	-1.12056
CG12338	-1.11194	0.286358	0.825583
CG1234	-0.656316	-0.494604	1.15092
CG12341	0.259829	-1.10427	0.84444
CG12343	-1.14869	0.472475	0.676219
CG12344	0.658081	0.492664	-1.15074
CG12355	0	0	0
CG1236	-1.00595	0.99394	0.0120117
CG12362	-0.57735	-0.57735	1.1547
CG12374	-0.57735	1.1547	-0.57735
CG12375	-0.430853	1.14321	-0.712353
CG12376	-0.897101	-0.181059	1.07816
CG12379	-0.963818	-0.0688103	1.03263
CG12384	-0.781977	-0.344799	1.12678
CG1239	-0.622206	-0.531301	1.15351
CG12391	-0.687707	-0.459448	1.14716
CG12446	-0.57735	1.1547	-0.57735
CG12448	0	0	0
CG1246	-0.544002	1.15407	-0.610069
CG12470	-0.596893	1.15448	-0.557585
CG12493	1.15032	-0.488153	-0.662168
CG12499	0.723925	0.417107	-1.14103
CG12512	0.382925	0.75195	-1.13487
CG12519	0.502124	0.64944	-1.15156
CG12531	-1.06695	0.151093	0.915855
CG12535	0.465936	0.682006	-1.14794
CG12541	-0.57735	1.1547	-0.57735
CG12547	-0.905489	-0.167793	1.07328
CG12560	-0.563437	-0.591153	1.15459
CG12567	-0.375663	1.13343	-0.757768
CG12576	0.712986	0.430106	-1.14309
CG12581	1.06711	-0.915599	-0.15151
CG12592	0.731071	0.408513	-1.13958
CG12594	-0.57735	-0.57735	1.1547
CG12605	-0.57735	1.1547	-0.57735
CG12608	-0.595516	-0.558992	1.15451
CG12617	0	0	0
CG12643	0.471006	0.677522	-1.14853
CG1265	0.130032	0.928623	-1.05866
CG12655	-0.57735	-0.57735	1.1547
CG12659	-0.952588	-0.0888893	1.04148
CG12674	1.09316	-0.868682	-0.22448
CG12689	-0.57735	1.1547	-0.57735
CG12692	0	0	0
CG12693	0	0	0
CG12698	-1.01233	0.0251345	0.987196
CG12699	0.217701	0.873216	-1.09092
CG12702	0.75644	0.377325	-1.13377
CG1271	-0.797201	-0.324831	1.12203
CG12713	1.08595	-0.203068	-0.882881
CG12717	0.752531	-1.13473	0.382201
CG12725	-1.06216	0.923335	0.138823
CG12728	0.736343	0.40212	-1.13846
CG12730	0.00275342	0.99862	-1.00137
CG12744	0.679501	0.468773	-1.14827
CG12746	-0.721338	-0.420198	1.14154
CG1275	0.752329	0.382453	-1.13478
CG12766	-0.756256	-0.377556	1.13381
CG12768	0.856684	0.242157	-1.09884
CG12773	1.08086	-0.188578	-0.892285
CG12795	-0.659749	-0.490825	1.15057
CG12811	-0.633704	1.1528	-0.519099
CG12814	0	0	0
CG12818	1.14539	-0.44599	-0.699404
CG12822	1.06052	-0.925821	-0.134703
CG12824	-0.57735	1.1547	-0.57735
CG12825	-0.279437	1.10999	-0.830558
CG12826	-0.57735	-0.57735	1.1547
CG12836	0.814483	0.301605	-1.11609
CG12848	-0.85829	-0.239812	1.0981
CG12851	-1.01923	0.0396446	0.979588
CG12853	-0.57735	1.1547	-0.57735
CG12857	-1.14585	0.696477	0.449376
CG12860	-0.57735	1.1547	-0.57735
CG12861	0.176646	0.899907	-1.07655
CG12863	0.653289	0.497923	-1.15121
CG12868	-0.32914	-0.793945	1.12308
CG12869	0.199767	0.885038	-1.0848
CG12877	-1.02985	0.0626377	0.967209
CG1288	-0.57735	1.1547	-0.57735
CG12880	0	0	0
CG12883	-0.614622	-0.539258	1.15388
CG12895	-0.881555	-0.205091	1.08665
CG12896	-0.131838	1.05938	-0.927541
CG12909	-0.718574	-0.42349	1.14206
CG12910	-0.57735	-0.57735	1.1547
CG12913	0.893487	0.186707	-1.08019
CG12917	0	0	0
CG12920	0.792447	0.331114	-1.12356
CG12923	-0.57735	1.1547	-0.57735
CG12926	0.00376391	0.998113	-1.00188
CG12929	-1.13386	0.756077	0.377779
CG12934	0.679094	0.469232	-1.14833
CG12935	-0.517521	1.1527	-0.63518
CG12942	0.914287	0.153642	-1.06793
CG12945	-0.243744	-0.855595	1.09934
CG12947	1.1006	-0.852817	-0.247778
CG12948	-0.645018	1.15194	-0.506927
CG12963	-1.05989	0.133117	0.926775
CG12971	0	0	0
CG12974	-0.605052	-0.549198	1.15425
CG12975	-0.908339	-0.163236	1.07158
CG12984	1.04821	-0.104662	-0.943553
CG12990	-0.57735	-0.57735	1.1547
CG12991	-0.873692	-0.216987	1.09068
CG12992	0	0	0
CG13000	-1.01975	0.0407445	0.979005
CG13001	0.799784	0.321398	-1.12118
CG13003	-0.873129	-0.217832	1.09096
CG13004	-1.15248	0.514242	0.638237
CG13005	-0.926108	-0.134226	1.06033
CG13010	-1.1547	0.578542	0.576158
CG13012	0.574884	0.579813	-1.1547
CG13014	-0.630956	-0.522031	1.15299
CG13016	-0.653419	1.1512	-0.49778
CG13018	-0.351652	1.12833	-0.776674
CG13021	-0.57735	1.1547	-0.57735
CG13024	-0.57735	-0.57735	1.1547
CG13025	1.0511	-0.111564	-0.93954
CG13032	0	0	0
CG1307	-0.335337	-0.789234	1.12457
CG13074	0.615009	0.538854	-1.15386
CG13077	-0.684801	-0.462761	1.14756
CG13078	-0.615838	-0.537987	1.15383
CG13085	1.08771	-0.208193	-0.879515
CG13086	1.15021	-0.487014	-0.663197
CG13088	1.04154	-0.0890268	-0.95251
CG1309	-0.36026	1.13021	-0.769954
CG13096	-0.697349	-0.448368	1.14572
CG13097	-0.16835	-0.90514	1.07349
CG13101	-0.57735	-0.57735	1.1547
CG13102	-0.57735	-0.57735	1.1547
CG13108	1.03995	-0.0853803	-0.954572
CG13116	-0.604732	-0.549529	1.15426
CG13117	-0.201355	-0.884001	1.08536
CG13123	0.507575	0.644419	-1.15199
CG13124	-0.756588	-0.37714	1.13373
CG13126	0.682896	0.464926	-1.14782
CG13127	-0.57735	-0.57735	1.1547
CG13138	0.881916	-1.08646	0.204541
CG13144	0.473251	0.675529	-1.14878
CG13148	-1.13835	0.736867	0.401482
CG13151	-1.08359	0.196298	0.887296
CG13154	-1.07938	0.894951	0.184424
CG13155	1.14971	-0.481966	-0.667742
CG13159	-0.57735	-0.57735	1.1547
CG1316	0.200485	-1.08505	0.88457
CG13160	-0.57735	-0.57735	1.1547
CG13168	0	0	0
CG1317	0.634439	0.518313	-1.15275
CG13175	0.980587	0.0377569	-1.01834
CG13185	-0.576734	1.1547	-0.577966
CG13192	-0.662662	-0.487607	1.15027
CG13197	-0.289869	-0.823044	1.11291
CG13204	-0.382556	1.1348	-0.752246
CG13220	-0.681198	-0.466852	1.14805
CG13229	-1.1547	0.578324	0.576376
CG13231	1.15356	-0.621201	-0.53236
CG1324	-0.57735	1.1547	-0.57735
CG13244	-0.57735	-0.57735	1.1547
CG13247	0.787625	0.337444	-1.12507
CG13248	0.874481	0.2158	-1.09028
CG13252	0.521417	-1.15295	0.631532
CG13255	0.740561	0.396972	-1.13753
CG13258	-0.828843	-0.281829	1.11067
CG13282	-0.643414	1.15208	-0.508663
CG13293	-0.57735	1.1547	-0.57735
CG13295	0.0255808	-1.01254	0.986964
CG13300	1.15439	-0.600549	-0.553837
CG13314	0	0	0
CG13315	-0.817002	-0.298168	1.11517
CG13319	-1.07985	0.185733	0.894112
CG13321	-0.833999	-0.274618	1.10862
CG13337	-0.57735	-0.57735	1.1547
CG13339	-1.15019	0.486752	0.663434
CG13344	0.561127	0.593423	-1.15455
CG13358	-0.836955	1.10741	-0.270457
CG13359	-0.57735	1.1547	-0.57735
CG13360	0.87342	0.217395	-1.09081
CG13362	-0.57735	1.1547	-0.57735
CG13364	-0.933533	-0.12178	1.05531
CG13365	-0.80766	-0.310847	1.11851
CG13366	0.66512	-1.15	0.484882
CG13367	0.163277	-1.07159	0.908314
CG13369	-0.948552	-0.0959747	1.04453
CG13373	-1.12622	0.783845	0.342373
CG13375	-1.0905	0.21644	0.874055
CG13377	0.563947	0.590651	-1.1546
CG13384	0.505143	0.646663	-1.15181
CG13390	0.734936	0.403831	-1.13877
CG13392	-1.15278	0.634037	0.518743
CG13397	-0.821861	1.11336	-0.291499
CG13398	0.212949	-1.08932	0.876373
CG13405	-0.57735	1.1547	-0.57735
CG13409	1.02744	-0.0573389	-0.970097
CG13430	0.0215021	0.989076	-1.01058
CG13436	-0.853939	1.10009	-0.246151
CG13437	-0.493148	-0.657641	1.15079
CG1344	0.648028	0.503661	-1.15169
CG13442	-0.57735	1.1547	-0.57735
CG13449	-0.57735	1.1547	-0.57735
CG13457	0.0421249	0.978272	-1.0204
CG13458	-0.953509	1.04077	-0.0872626
CG13482	-0.590118	-0.564488	1.15461
CG13484	0.278402	0.831298	-1.1097
CG13488	-0.0553675	-0.971166	1.02653
CG13506	-0.586943	-0.567704	1.15465
CG13510	0.623102	0.530356	-1.15346
CG13511	0.608841	0.545277	-1.15412
CG13516	-0.593544	-0.561003	1.15455
CG13531	0.561644	0.592916	-1.15456
CG1354	-1.1142	0.819633	0.294564
CG13540	-0.57735	1.1547	-0.57735
CG13544	0	0	0
CG13551	-0.634813	-0.517913	1.15273
CG13559	-0.604872	-0.549385	1.15426
CG13562	0.610564	0.543487	-1.15405
CG13563	-0.731615	1.13947	-0.407856
CG13578	1.06852	-0.913333	-0.155189
CG1358	0.626064	0.527226	-1.15329
CG13585	0.871039	-1.092	0.220962
CG13599	0.345474	0.781457	-1.12693
CG1360	-1.15357	0.532528	0.621041
CG13601	0.188058	0.892619	-1.08068
CG13603	0.700611	0.44459	-1.1452
CG13604	0.0293606	-1.01436	0.984996
CG13605	0.72195	0.419468	-1.14142
CG13607	1.12339	-0.330418	-0.792976
CG13609	1.15174	-0.504256	-0.64748
CG13623	-1.14966	0.668145	0.481517
CG13625	-0.692529	-0.453925	1.14645
CG13630	-0.465253	-0.682608	1.14786
CG13631	0.0526433	-1.02528	0.972639
CG13654	0.624488	0.528893	-1.15338
CG13659	-0.57735	1.1547	-0.57735
CG13663	-0.327176	-0.795431	1.12261
CG13667	0.960567	0.0746789	-1.03525
CG13671	0.535919	0.617813	-1.15373
CG13676	0.475497	0.673529	-1.14903
CG13689	1.14225	-0.71759	-0.424658
CG13690	-0.927916	-0.131213	1.05913
CG13692	-0.952813	-0.0884917	1.0413
CG13693	-1.06528	0.146792	0.918491
CG13694	1.14119	-0.418067	-0.723122
CG13698	0	0	0
CG13707	0	0	0
CG1371	0.469288	0.679044	-1.14833
CG13739	1.13618	-0.389727	-0.746457
CG13741	1.15074	-0.492644	-0.658098
CG13742	-1.12713	0.780781	0.34635
CG13743	-0.57735	1.1547	-0.57735
CG13747	-0.836641	-0.270899	1.10754
CG13749	-0.96737	1.02971	-0.0623438
CG13751	-0.124602	1.05646	-0.93186
CG13760	1.1375	-0.740716	-0.396783
CG13766	0.576279	0.578421	-1.1547
CG13773	-0.311762	-0.806981	1.11874
CG13775	0.786201	0.339304	-1.1255
CG13784	-0.522027	-0.630959	1.15299
CG13807	-0.92583	1.06052	-0.134688
CG13813	-0.380715	1.13444	-0.753725
CG13827	-0.921005	1.06367	-0.142666
CG13850	-0.61606	-0.537755	1.15382
CG13868	-0.52837	-0.624983	1.15335
CG13871	-1.12342	0.330508	0.792907
CG13875	1.13372	-0.377083	-0.756634
CG13876	0.944435	-1.04757	0.103136
CG13877	-0.895776	1.07891	-0.183135
CG13887	-0.491283	-0.659334	1.15062
CG13891	-0.57735	-0.57735	1.1547
CG13893	0.943215	0.105246	-1.04846
CG13895	1.02673	-0.0557993	-0.970932
CG13896	-0.764198	-0.367568	1.13177
CG13898	-0.57735	1.1547	-0.57735
CG13901	-0.630937	-0.52205	1.15299
CG13907	0.450088	0.695861	-1.14595
CG13917	0.787716	0.337324	-1.12504
CG13919	-0.840536	-0.265388	1.10592
CG13920	1.13831	-0.401238	-0.737068
CG13921	1.00317	-0.0063697	-0.9968
CG13926	-1.15356	0.621202	0.532358
CG13928	-0.372157	-0.76056	1.13272
CG13933	0.439731	0.704785	-1.14452
CG13937	-0.495325	-0.655659	1.15098
CG1394	0.381389	0.753184	-1.13457
CG13982	1.05337	-0.117041	-0.936329
CG13992	-1.03853	0.0821277	0.956404
CG13994	0.0343988	0.982357	-1.01676
CG14005	-1.1529	0.632247	0.520655
CG14015	0.649476	0.502085	-1.15156
CG14020	1.1547	-0.57735	-0.57735
CG14024	-0.57735	1.1547	-0.57735
CG14036	-0.550263	1.15428	-0.604021
CG14042	1.05966	-0.132549	-0.927115
CG14043	0.0850414	-1.0398	0.954764
CG14044	-0.171191	1.07454	-0.903354
CG14050	-1.1547	0.579911	0.574785
CG14053	-0.57735	1.1547	-0.57735
CG14054	-0.57735	1.1547	-0.57735
CG14057	-0.948699	-0.0957194	1.04442
CG1407	-0.675979	-0.472745	1.14872
CG14072	-0.57735	1.1547	-0.57735
CG14073	-0.491152	-0.659453	1.1506
CG14074	0.859798	-1.0974	0.237604
CG14077	-0.710857	1.14347	-0.432615
CG14079	0.877022	0.211969	-1.08899
CG14100	-0.576972	1.1547	-0.577729
CG14102	1.06764	-0.15289	-0.91475
CG14104	-1.14065	0.725858	0.414791
CG14105	-0.804935	-0.314511	1.11945
CG14109	0	0	0
CG14113	0	0	0
CG14117	0.322276	0.799125	-1.1214
CG14130	-0.122183	-0.933294	1.05548
CG14132	-1.00228	0.00456913	0.997708
CG14135	-0.0238596	-0.987857	1.01172
CG14142	-0.179831	1.07771	-0.897883
CG14154	-0.965694	1.0311	-0.0654021
CG1416	-0.538876	-0.614988	1.15386
CG14174	-1.15411	0.544968	0.609138
CG1418	-0.204034	-0.882248	1.08628
CG14182	-0.263117	-0.842134	1.10525
CG14183	-0.594749	-0.559774	1.15452
CG14184	-0.949906	-0.0936063	1.04351
CG14194	1.10871	-0.274928	-0.833778
CG14196	-0.57735	1.1547	-0.57735
CG14200	0.651768	0.499585	-1.15135
CG14207	1.15257	-0.515629	-0.636945
CG14210	-0.990519	-0.0186993	1.00922
CG14212	-0.57735	1.1547	-0.57735
CG14220	-0.847486	-0.255467	1.10295
CG14221	-1.08621	0.203837	0.882377
CG14223	-0.822373	1.11317	-0.290794
CG14229	-0.609282	1.1541	-0.544819
CG14230	0.0978773	-1.04534	0.947462
CG14231	0.838163	0.26875	-1.10691
CG14232	-0.907804	-0.164094	1.0719
CG14252	1.0267	-0.970964	-0.0557409
CG14253	-0.587885	-0.566751	1.15464
CG14257	-0.326464	-0.795968	1.12243
CG14260	0.468494	0.679747	-1.14824
CG14262	-0.812237	-0.304658	1.11689
CG14269	-0.57735	1.1547	-0.57735
CG14270	-1.15214	0.509519	0.642622
CG14273	-0.57735	-0.57735	1.1547
CG14275	0	0	0
CG14285	-0.707321	1.14409	-0.436765
CG14286	-1.13934	0.407078	0.732258
CG14292	-0.508106	-0.643929	1.15203
CG14294	0	0	0
CG14297	-0.57735	1.1547	-0.57735
CG14302	-0.491687	1.15065	-0.658968
CG14305	0	0	0
CG14312	1.04906	-0.942385	-0.106677
CG14314	-0.57735	1.1547	-0.57735
CG14322	-0.845081	1.10399	-0.258913
CG14325	-0.57735	1.1547	-0.57735
CG14332	1.1547	-0.57735	-0.57735
CG1434	-0.478332	1.14933	-0.670999
CG14341	-1.06979	0.158519	0.911273
CG14346	0	0	0
CG14352	-1.14497	0.702056	0.44291
CG14355	-0.57735	1.1547	-0.57735
CG14367	0.0470096	0.975666	-1.02268
CG1440	0.841514	0.263999	-1.10551
CG14401	0.831891	0.277573	-1.10946
CG14402	-0.57735	1.1547	-0.57735
CG14406	0.510166	0.642022	-1.15219
CG14407	-0.805207	-0.314147	1.11935
CG14408	0.942013	-1.04933	0.107318
CG14411	0.715832	0.426742	-1.14257
CG14414	-1.01592	0.0326408	0.98328
CG14431	-1.04114	0.088116	0.953026
CG14434	-0.837337	-0.269917	1.10725
CG14435	0.85006	0.251762	-1.10182
CG14440	0.360369	0.769868	-1.13024
CG14441	0.219298	0.872151	-1.09145
CG14442	1.10485	-0.261785	-0.843069
CG14443	-0.998258	-0.00347478	1.00173
CG14450	-1.12998	0.770806	0.359174
CG14451	-1.03336	0.070456	0.962909
CG14459	-0.57735	-0.57735	1.1547
CG14464	-0.579358	-0.57534	1.1547
CG14478	1.05003	-0.108979	-0.941047
CG14480	-0.531185	-0.622316	1.1535
CG14483	-0.942116	-0.10714	1.04926
CG14488	-0.57735	1.1547	-0.57735
CG14490	1.13242	-0.370729	-0.761694
CG14491	0	0	0
CG14502	0.127362	0.930218	-1.05758
CG14511	0.246196	-1.1001	0.853908
CG14512	-1.15062	0.659272	0.491351
CG14516	1.1547	-0.57735	-0.57735
CG14535	-0.0103104	1.00512	-0.994805
CG14540	0	0	0
CG14543	-1.03167	0.0666735	0.964995
CG14544	-0.102252	1.0472	-0.944946
CG14545	1.11073	-0.828697	-0.282032
CG14556	-1.11455	0.295859	0.818689
CG14561	0.828654	0.282092	-1.11075
CG14562	0.347483	0.779905	-1.12739
CG14566	0.166622	0.906223	-1.07285
CG14567	-0.234779	-0.861722	1.0965
CG14572	-0.686401	-0.460939	1.14734
CG14579	-0.57735	1.1547	-0.57735
CG14589	0	0	0
CG14605	0	0	0
CG14609	0.598354	0.556089	-1.15444
CG1461	-1.13546	0.749538	0.385917
CG14610	-0.640752	-0.511537	1.15229
CG14613	-0.602642	-0.551683	1.15433
CG14615	0.778712	0.349025	-1.12774
CG14618	-0.897563	-0.180333	1.0779
CG14621	0.699063	0.446385	-1.14545
CG14628	-0.57735	1.1547	-0.57735
CG14629	-0.270863	1.10753	-0.836667
CG1463	0.844766	0.259363	-1.10413
CG14630	0.431217	0.712044	-1.14326
CG14636	-0.57735	-0.57735	1.1547
CG14641	-0.766617	-0.364504	1.13112
CG14642	0.759997	0.372865	-1.13286
CG14645	-0.625443	-0.527883	1.15333
CG14646	-0.184521	-0.894889	1.07941
CG14647	-0.543635	1.15406	-0.610422
CG14650	0.606219	0.547992	-1.15421
CG14655	0.852018	0.248935	-1.10095
CG14657	0.706007	0.438303	-1.14431
CG14658	-1.02857	0.968742	0.0598301
CG14662	-0.389908	1.13622	-0.746311
CG14664	1.12725	-0.780374	-0.346876
CG14667	-1.101	0.249104	0.851901
CG14669	-0.57735	-0.57735	1.1547
CG14671	-1.15338	0.528811	0.624565
CG14683	-0.745453	-0.390966	1.13642
CG14688	-0.583367	-0.571312	1.15468
CG14692	0	0	0
CG14693	-0.850432	1.10166	-0.251226
CG14694	-1.14574	0.697177	0.448568
CG14695	0.617695	0.536043	-1.15374
CG14696	-0.0386706	1.01877	-0.980104
CG14701	-0.256429	-0.846815	1.10324
CG14708	1.1547	-0.57735	-0.57735
CG14710	-0.868734	1.09314	-0.224402
CG14711	-1.15393	0.613549	0.540378
CG14712	0.00471523	0.997634	-1.00235
CG14715	-1.14962	0.481152	0.668472
CG14718	0	0	0
CG14721	0.974682	0.0488457	-1.02353
CG14722	-0.189462	-0.891716	1.08118
CG14740	-0.556786	-0.597674	1.15446
CG14757	0.605005	0.549247	-1.15425
CG14760	0.351513	0.776782	-1.12829
CG14762	-1.085	0.884668	0.200333
CG14763	1.09335	-0.225064	-0.868289
CG14764	0.277963	0.831612	-1.10958
CG14767	0.704942	0.439547	-1.14449
CG14777	1.08255	-0.193341	-0.889212
CG14778	-0.712522	-0.430653	1.14318
CG14780	-0.705015	1.14448	-0.439462
CG14785	1.14238	-0.425473	-0.716903
CG14787	-0.8942	1.0798	-0.185596
CG14797	-0.249213	1.10104	-0.851826
CG14803	-0.268216	1.10676	-0.838541
CG14805	-0.151345	1.06705	-0.915701
CG14806	-0.128445	-0.929571	1.05802
CG14812	-1.09806	0.85839	0.239666
CG14814	0.510041	0.642138	-1.15218
CG14817	-0.89101	-0.190558	1.08157
CG14818	0.656744	0.494134	-1.15088
CG14829	-1.15392	0.540279	0.613645
CG14830	0	0	0
CG14834	-0.70537	-0.439048	1.14442
CG14855	-0.598696	1.15443	-0.555738
CG14856	-0.939294	-0.111984	1.05128
CG1486	0.989928	0.019849	-1.00978
CG14860	-0.514906	1.15252	-0.637619
CG14864	1.14438	-0.438795	-0.705586
CG14866	0.842995	0.26189	-1.10489
CG14868	-1.09965	0.854901	0.244753
CG14879	-0.57735	-0.57735	1.1547
CG14881	0.397218	0.74036	-1.13758
CG14882	-0.27341	1.10827	-0.834859
CG14883	0.388881	0.747142	-1.13602
CG14894	-0.979048	-0.0406644	1.01971
CG14903	-1.04513	0.0973928	0.94774
CG14906	-0.390639	-0.745717	1.13636
CG14907	-0.456696	-0.690113	1.14681
CG1492	0.0215109	0.989071	-1.01058
CG14921	0.698854	0.446628	-1.14548
CG14926	-0.57735	1.1547	-0.57735
CG14931	-0.57735	1.1547	-0.57735
CG14932	1.02001	-0.0412976	-0.978711
CG14937	1.15385	-0.538555	-0.615296
CG1494	0.609213	0.54489	-1.1541
CG14957	0.180713	0.897321	-1.07803
CG14961	-0.70608	-0.438218	1.1443
CG14963	0.286572	0.825428	-1.112
CG14964	-0.57735	1.1547	-0.57735
CG14965	-0.697629	1.14567	-0.448046
CG14966	-0.709994	-0.43363	1.14362
CG14968	-0.57735	1.1547	-0.57735
CG14969	0.782855	0.34366	-1.12651
CG14971	0.434208	0.709502	-1.14371
CG14974	-0.57735	1.1547	-0.57735
CG14977	-1.14779	0.464664	0.683128
CG14984	0	0	0
CG14985	-1.11655	0.303366	0.813188
CG14989	0	0	0
CG14990	-0.490978	-0.659611	1.15059
CG14995	-0.621772	-0.531759	1.15353
CG14997	-0.849258	-0.252918	1.10218
CG15011	1.14053	-0.414061	-0.726466
CG15012	-0.582453	-0.572232	1.15469
CG15014	-1.09962	0.244653	0.85497
CG15019	-0.762094	-0.370225	1.13232
CG15027	-0.893792	-0.186233	1.08002
CG1503	1.15469	-0.580854	-0.573839
CG15034	0	0	0
CG15035	-0.57735	1.1547	-0.57735
CG15040	-0.57735	-0.57735	1.1547
CG15043	0.400063	0.738031	-1.13809
CG15073	0.599928	0.554474	-1.1544
CG15080	1.05627	-0.124141	-0.932134
CG15083	0.237497	0.859871	-1.09737
CG15084	-0.85876	-0.239125	1.09788
CG15093	0.723569	-1.1411	0.417534
CG15097	-0.675349	-0.473453	1.1488
CG15098	-0.956218	-0.0824574	1.03868
CG15099	0.760271	0.37252	-1.13279
CG15107	-1.13765	0.397629	0.740025
CG15109	-0.57735	1.1547	-0.57735
CG15111	1.01972	-0.0406851	-0.979037
CG15117	0.436281	0.707734	-1.14402
CG15118	0.768154	0.362552	-1.13071
CG15120	-0.57735	-0.57735	1.1547
CG15127	-0.57735	-0.57735	1.1547
CG15128	-0.57735	1.1547	-0.57735
CG1513	-0.486011	-0.664103	1.15011
CG15136	0	0	0
CG15141	0.868247	0.225127	-1.09337
CG15142	1.09872	-0.241769	-0.85695
CG15143	-0.57735	-0.57735	1.1547
CG15144	0.468201	0.680007	-1.14821
CG15145	0	0	0
CG15147	-0.57735	-0.57735	1.1547
CG15160	0.61322	0.540721	-1.15394
CG15168	0.381951	0.752733	-1.13468
CG15170	0.995811	0.00832533	-1.00414
CG15172	0.673062	0.476021	-1.14908
CG15177	0	0	0
CG15186	-0.57735	-0.57735	1.1547
CG15196	-0.994277	-0.0113498	1.00563
CG15199	-0.88142	-0.205296	1.08672
CG15200	-0.57735	1.1547	-0.57735
CG15201	-0.57735	1.1547	-0.57735
CG15202	0.328142	0.7947	-1.12284
CG15209	0.67092	0.478419	-1.14934
[truncated: 8,393 more rows]

## Sheet: PM2
gene	Unwouned_AverageExpression	Wounded_AverageExpression	Wasp inf. 24h_AverageExpression
128up	-0.739311	-0.398501	1.13781
14-3-3epsilon	-0.499612	-0.651743	1.15136
14-3-3zeta	-0.498844	-0.652446	1.15129
140up	0.0364943	0.981253	-1.01775
18SrRNA-Psi:CR41602	-1.05418	0.11901	0.93517
18SrRNA-Psi:CR45861	0.415676	0.72512	-1.1408
18SrRNA:CR41548	0.63023	0.522804	-1.15303
18SrRNA:CR45838	0.60506	0.54919	-1.15425
18SrRNA:CR45841	0.597736	0.556722	-1.15446
18w	-0.57735	-0.57735	1.1547
26-29-p	0.242854	0.856206	-1.09906
28SrRNA-Psi:CR40596	0.388512	0.747441	-1.13595
28SrRNA-Psi:CR40741	0.661731	0.488637	-1.15037
28SrRNA-Psi:CR41609	0.805209	0.314144	-1.11935
28SrRNA-Psi:CR45848	0.427988	0.714779	-1.14277
28SrRNA-Psi:CR45851	0.684177	0.463472	-1.14765
28SrRNA-Psi:CR45853	0.849484	0.252594	-1.10208
28SrRNA-Psi:CR45855	-0.746068	-0.390207	1.13628
28SrRNA-Psi:CR45859	-0.726075	-0.41453	1.1406
28SrRNA-Psi:CR45860	0.76308	0.368981	-1.13206
28SrRNA-Psi:CR45862	0.0943722	0.949469	-1.04384
28SrRNA:CR45837	0.30888	0.809118	-1.118
28SrRNA:CR45844	0.644543	0.507441	-1.15198
312	-0.982993	-0.0331882	1.01618
4E-T	0.614216	0.539682	-1.1539
5-HT1A	1.1547	-0.57735	-0.57735
5.8SrRNA-Psi:CR45849	0.0454088	0.976522	-1.02193
5.8SrRNA-Psi:CR45854	-0.275129	-0.833635	1.10876
5.8SrRNA-Psi:CR45857	-0.826447	-0.285159	1.11161
5.8SrRNA-Psi:CR45863	-0.495874	-0.655159	1.15103
5.8SrRNA:CR40454	1.03345	-0.0706383	-0.962808
5.8SrRNA:CR45839	1.03345	-0.0706383	-0.962808
5.8SrRNA:CR45842	1.03345	-0.0706383	-0.962808
5.8SrRNA:CR45852	1.03345	-0.0706383	-0.962808
5PtaseI	-0.243643	1.09931	-0.855665
7B2	0	0	0
7SLRNA:CR32864	0.51018	0.642009	-1.15219
7SLRNA:CR42652	0.362551	0.768155	-1.13071
a	-0.619894	1.15363	-0.533734
A16	-0.276264	-0.832825	1.10909
a6	0.997168	0.00563936	-1.00281
AANAT1	0.638105	0.514385	-1.15249
AANATL2	1.1547	-0.57735	-0.57735
Aasdh	0.633973	0.518811	-1.15278
Aatf	-0.423191	-0.718825	1.14202
aay	-0.0538799	1.02585	-0.971971
ab	0.367597	0.764176	-1.13177
ABCA	0.0232987	0.988147	-1.01145
ABCB7	0.904892	0.168744	-1.07364
ABCD	-0.395635	1.13729	-0.741653
abd-A	-0.924324	-0.137187	1.06151
Abd-B	-0.57735	1.1547	-0.57735
Abi	0.0568005	0.970389	-1.02719
Abl	0.826027	0.285742	-1.11177
abo	0.784155	0.34197	-1.12612
Abp1	0.16187	0.909191	-1.07106
abs	-0.0372803	1.01812	-0.980839
Ac13E	0.214662	0.875237	-1.0899
Ac3	-0.57735	-0.57735	1.1547
Ac76E	-0.63986	-0.512496	1.15236
Ac78C	-0.69544	-0.450574	1.14601
Acbp1	-0.959285	-0.0769811	1.03627
Acbp2	-0.208793	1.08791	-0.87912
Acbp3	-0.57735	-0.57735	1.1547
Acbp4	1.1547	-0.57735	-0.57735
Acbp5	-0.222977	1.09267	-0.86969
Acbp6	-0.622353	-0.531146	1.1535
ACC	-0.38724	1.13571	-0.74847
AcCoAS	-0.534043	-0.619601	1.15364
Ace	1.15465	-0.586342	-0.568312
Acer	0.555088	0.59933	-1.15442
Acf	0.574427	0.580269	-1.1547
achi	0.00568606	0.997145	-1.00283
acj6	0.526804	0.626462	-1.15327
Ack	1.00648	-0.0130982	-0.993387
Ack-like	-0.225641	-0.867901	1.09354
Acn	-0.762403	-0.369835	1.13224
Acox57D-d	-0.12337	1.05596	-0.932591
Acox57D-p	0.516753	0.635897	-1.15265
Acp95EF	0.294387	0.819761	-1.11415
Acph-1	0.261576	0.843216	-1.10479
Acsl	-0.993329	-0.0132112	1.00654
Act42A	-1.00198	0.00397575	0.998006
Act57B	-0.507186	1.15196	-0.644779
Act5C	0.813195	0.303357	-1.11655
Act79B	-0.635879	-0.516772	1.15265
Act87E	-0.611491	-0.542523	1.15401
Act88F	-0.681557	-0.466445	1.148
Actbeta	0.0672474	0.964679	-1.03193
Actn	0.968873	0.0595886	-1.02846
ACXD	-0.57735	1.1547	-0.57735
Acyp2	-1.09719	0.860242	0.236953
Ada	-1.12478	0.336227	0.788555
Ada1-1	-1.13202	0.368764	0.763252
Ada1-2	0.0770951	0.959221	-1.03632
Ada2a	-0.581726	-0.572964	1.15469
Ada2b	1.01821	-0.980738	-0.0374707
Ada3	0.527425	0.625876	-1.1533
AdamTS-A	-0.541049	-0.612906	1.15396
AdamTS-B	-0.57735	1.1547	-0.57735
Adar	0.340827	0.785033	-1.12586
Adat1	-0.127351	1.05758	-0.930224
Adck1	0.324639	0.797345	-1.12198
Adck5	0.0569181	0.970325	-1.02724
ADD1	-1.09536	0.231217	0.864139
AdenoK	0.200909	-1.0852	0.884292
Adf1	-0.650344	-0.501139	1.15148
Adgf-A	-0.73872	-0.399223	1.13794
Adgf-A2	-0.57735	1.1547	-0.57735
Adh	0.291081	0.822165	-1.11325
Adhr	0.82888	0.281777	-1.11066
Adi1	-0.780503	-0.346709	1.12721
AdipoR	-0.505472	-0.64636	1.15183
Adk1	0.69363	0.452658	-1.14629
Adk2	-0.644797	-0.507166	1.15196
Adk3	0.6607	0.489776	-1.15048
AdoR	0	0	0
adp	0.507715	0.64429	-1.15201
AdSL	-0.946677	1.04592	-0.0992449
AdSS	-1.01522	0.0311784	0.984046
Aduk	-0.274264	1.10851	-0.834251
Ady43A	1.00802	-0.0162322	-0.991785
Aef1	-0.672403	-0.47676	1.14916
aft	0.334863	0.789595	-1.12446
Afti	0.842847	0.262101	-1.10495
Ag5r	-0.57735	-0.57735	1.1547
Ag5r2	0.283217	0.827845	-1.11106
AGBE	-0.560796	-0.593748	1.15454
AgmNAT	0.810989	-1.11734	0.30635
ago	0.824677	0.287613	-1.11229
AGO1	1.07792	-0.180412	-0.897513
AGO2	-0.353493	1.12874	-0.775242
AGO3	0.112047	0.939257	-1.0513
Agpat1	0.387687	0.748109	-1.1358
Agpat2	-0.2725	1.108	-0.835505
Agpat3	-0.539238	-0.614641	1.15388
Agpat4	-0.723064	1.1412	-0.418137
agt	0.706108	0.438185	-1.14429
Ahcy	0.70747	0.43659	-1.14406
AhcyL1	1.06444	-0.144627	-0.919812
AIF	-0.97335	1.02467	-0.0513226
AIMP1	-0.78802	-0.336927	1.12495
AIMP2	-0.641981	-0.51021	1.15219
AIMP3	-0.746198	-0.390047	1.13624
Ak6	-0.779722	-0.347719	1.12744
Akap200	-0.934064	-0.120883	1.05495
Akh	1.0494	-0.94191	-0.107495
akirin	-0.309708	-0.808505	1.11821
Akt1	0.90829	0.163316	-1.07161
Aladin	-1.10668	0.267949	0.838729
AlaRS	0.596479	0.558008	-1.15449
AlaRS-m	0.661573	0.488811	-1.15038
Alas	0.348998	0.778732	-1.12773
alc	0.664841	0.485192	-1.15003
Ald1	0.562471	0.592103	-1.15457
Aldh	0.332947	0.791055	-1.124
Aldh-III	0.508791	0.643296	-1.15209
Aldh7A1	0.906152	-1.07289	0.166735
Alg-2	-1.1522	0.51026	0.641935
Alg1	0.818078	-1.11477	0.296695
Alg10	-0.901762	-0.173713	1.07548
Alg11	-0.548445	-0.605781	1.15423
Alg14	-0.83197	-0.277463	1.10943
Alg2	-0.829469	-0.280957	1.11043
Alg3	0.773134	0.356197	-1.12933
Alg9	-0.89494	1.07938	-0.184441
Alh	-0.678567	-0.469827	1.14839
alien	-0.876582	-0.212634	1.08922
ALiX	0.811669	0.305429	-1.1171
Alk	-1.1352	0.384591	0.750608
AlkB	-0.937695	-0.114716	1.05241
Alp12	0.557451	0.597023	-1.15447
alph	-0.583216	-0.571465	1.15468
alpha-Cat	-0.9079	-0.16394	1.07184
alpha-Est1	0.949282	0.0946994	-1.04398
alpha-Est10	1.13443	-0.380675	-0.753757
alpha-Est3	-0.819441	-0.294828	1.11427
alpha-Est4	-0.359365	1.13002	-0.770655
alpha-Est5	-0.57735	1.1547	-0.57735
alpha-Est7	0.469316	0.67902	-1.14834
alpha-Est8	-0.864162	-0.231182	1.09534
alpha-Est9	-0.24871	1.10088	-0.852173
alpha-Man-Ia	0.497843	0.653361	-1.1512
alpha-Man-Ib	-0.449021	1.14581	-0.696785
alpha-Man-Ic	0.76708	0.363917	-1.131
alpha-Man-IIa	0.830228	0.279898	-1.11013
alpha-Man-IIb	-0.564631	-0.589977	1.15461
alpha-PheRS	-0.893609	-0.186518	1.08013
alpha-Spec	0.700655	0.444539	-1.14519
alpha4GT1	-0.106117	1.04883	-0.94271
alphaCOP	0.701348	0.443734	-1.14508
alphaSnap	-0.412979	-0.727366	1.14035
alphaTub67C	1.00989	-0.0200827	-0.989807
alphaTub84B	-0.697907	-0.447723	1.14563
alphaTub84D	0.641887	-1.1522	0.510312
alphaTub85E	-0.200902	1.0852	-0.884297
Alr	0.910982	0.158987	-1.06997
Als2	0.51993	0.632926	-1.15286
alt	-0.481722	-0.667961	1.14968
Ama	0.688383	0.458676	-1.14706
Amacr	-0.273695	1.10835	-0.834655
amn	0.595054	0.559464	-1.15452
amon	0	0	0
AMPdeam	-0.589729	-0.564883	1.15461
Amph	-0.758038	1.13336	-0.375324
AMPKalpha	0.508118	0.643918	-1.15204
Amun	0.860276	-1.09718	0.236903
amx	-0.861482	-0.235132	1.09661
ana	-0.57735	-0.57735	1.1547
ana1	0.202423	0.883303	-1.08573
ana2	-0.222069	1.09237	-0.870298
ana3	0.23601	0.860884	-1.09689
Ance	-0.645332	-0.506587	1.15192
Ance-2	-0.671353	-0.477936	1.14929
Ance-3	0.495621	0.65539	-1.15101
Ance-4	-0.651925	-0.499414	1.15134
Ance-5	0.667664	0.482053	-1.14972
anchor	1.10571	-0.264665	-0.841045
angel	-0.740692	-0.396812	1.1375
Ank	0.671631	0.477624	-1.14925
Ank2	-0.57735	-0.57735	1.1547
Ankle2	0.527232	0.626058	-1.15329
anne	-0.826033	1.11177	-0.285733
anox	-0.0969024	-0.948021	1.04492
Ant2	-0.205928	-0.881005	1.08693
antdh	-0.57735	1.1547	-0.57735
Antp	-0.57735	-0.57735	1.1547
antr	0.394341	0.742708	-1.13705
AnxB10	0.625118	0.528227	-1.15334
AnxB11	-0.251157	1.10164	-0.85048
AnxB9	-0.64063	-0.511668	1.1523
aop	0.603317	-1.15431	0.550988
aos	-0.185186	1.07965	-0.894463
Aos1	-0.663882	-0.486256	1.15014
AOX1	0.760046	0.372803	-1.13285
AOX3	0.827277	0.284008	-1.11128
ap	0	0	0
AP-1-2beta	0.64199	0.510201	-1.15219
AP-1gamma	0.538048	0.61578	-1.15383
AP-1mu	0.880318	0.206974	-1.08729
AP-1sigma	-0.47214	-0.676516	1.14866
AP-2alpha	0.701377	0.4437	-1.14508
AP-2mu	0.706962	0.437186	-1.14415
AP-2sigma	0.0602412	0.968518	-1.02876
Apc	0.585585	0.569076	-1.15466
APC10	0.607537	0.546628	-1.15416
Apc2	0.441688	0.703106	-1.14479
APC4	1.01506	-0.0308289	-0.984229
ApepP	-0.0316318	1.01544	-0.983809
Apf	-0.936201	-0.11726	1.05346
aph-1	-0.619153	-0.534514	1.15367
aPKC	0.0981403	0.947311	-1.04545
Apl	0.657297	0.493525	-1.15082
Aplip1	0.883135	-1.08581	0.202679
apolpp	0.855935	0.243249	-1.09918
Apoltp	1.04004	-0.0855726	-0.954464
app	-0.677594	-0.470925	1.14852
APP-BP1	-0.1408	1.06294	-0.922138
Appl	1.15336	-0.528579	-0.624785
Aprt	-0.622527	-0.530963	1.15349
Aps	-0.498594	-0.652675	1.15127
apt	-0.882029	-0.204368	1.0864
aqz	-0.52179	-0.631182	1.15297
ara	0	0	0
aralar1	0.735888	0.402674	-1.13856
Arc1	-0.903658	-0.170708	1.07437
Arc2	-0.597293	-0.557175	1.15447
Arc42	-0.84229	-0.262895	1.10518
Archease	-1.12503	0.787736	0.337298
Arf102F	-0.668689	-0.480911	1.1496
Arf51F	-0.0198251	-0.98994	1.00977
Arf79F	-0.4111	-0.728927	1.14003
ArfGAP1	1.10032	-0.246883	-0.853434
ArfGAP3	-0.762567	1.1322	-0.369629
Arfip	-0.773212	-0.356097	1.12931
Arfrp1	-0.202676	-0.883138	1.08581
arg	0.807025	0.311703	-1.11873
Argk	0.801625	0.318944	-1.12057
Argl	0.881854	0.204634	-1.08649
ArgRS	0.417625	0.723492	-1.14112
ArgRS-m	0.780988	0.346081	-1.12707
ari-1	-0.76465	-0.366996	1.13165
ari-2	0.679304	0.468995	-1.1483
Arl1	0.171005	-1.07448	0.903471
Arl2	-0.900524	-0.175672	1.0762
Arl4	-0.824186	-0.288292	1.11248
Arl5	-0.804398	-0.315232	1.11963
Arl6	-0.895058	1.07932	-0.184257
Arl6IP1	1.07877	-0.896024	-0.182747
Arl8	0.416416	0.724502	-1.14092
arm	0.736987	0.401336	-1.13832
armi	-0.43255	1.14346	-0.710912
Arp1	0.304124	0.812631	-1.11675
Arp10	1.13253	-0.761273	-0.37126
Arp2	-0.0332157	1.01619	-0.982978
Arp3	-0.639873	-0.512483	1.15236
Arp5	-0.497218	1.15115	-0.653932
Arp53D	-0.57735	1.1547	-0.57735
Arp6	0.632342	0.520554	-1.1529
Arp8	1.03622	-0.959345	-0.0768721
Arpc1	0.985518	-1.01388	0.0283615
Arpc2	-0.244189	-0.855289	1.09948
Arpc3A	-1.14006	0.411303	0.728759
Arpc3B	-0.898129	-0.179444	1.07757
Arpc4	-0.854219	-0.245745	1.09996
Arpc5	-0.628573	-0.524565	1.15314
arr	0.351445	0.776835	-1.12828
Ars2	-0.60475	-0.54951	1.15426
Art1	1.15119	-0.497655	-0.653533
Art3	-0.981962	-0.0351485	1.01711
Art4	0.629568	0.523508	-1.15308
Art7	0.394853	0.742291	-1.13714
Art8	-1.0008	0.00159299	0.999203
Arts	0.341831	0.784262	-1.12609
aru	-1.01849	0.038071	0.980421
Arv1	-1.11087	0.282546	0.828328
arx	-0.642021	-0.510167	1.15219
Asap	0.792911	0.330503	-1.12341
Asator	0.319728	0.801037	-1.12076
Asciz	0.561403	0.593152	-1.15456
asf1	1.02154	-0.0445793	-0.976965
ash1	0.591719	0.562861	-1.15458
ash2	-0.523403	1.15307	-0.629666
Ask1	0.636313	0.516307	-1.15262
asl	0.308497	0.809402	-1.1179
AsnRS	0.616587	0.537204	-1.15379
AsnRS-m	-1.1212	0.799717	0.321487
AsnS	0.514867	0.637655	-1.15252
asp	0.775837	0.352728	-1.12857
Asph	0.648877	0.502737	-1.15161
ASPP	-0.57735	1.1547	-0.57735
AspRS	0.454206	0.692284	-1.14649
AspRS-m	0.376788	0.756869	-1.13366
asrij	-0.84762	-0.255274	1.10289
asRNA:ASTR	0.613871	0.540043	-1.15391
asRNA:CR17025	1.1547	-0.57735	-0.57735
asRNA:CR31144	-0.617037	-0.536732	1.15377
asRNA:CR31514	0.653785	0.49738	-1.15116
asRNA:CR31912	-0.398965	-0.738931	1.1379
asRNA:CR32252	-0.57735	1.1547	-0.57735
asRNA:CR33945	0.498448	0.652808	-1.15126
asRNA:CR42254	0.260532	-1.10448	0.843948
asRNA:CR42547	0.507022	0.64493	-1.15195
asRNA:CR42738	-1.13034	0.36085	0.769491
asRNA:CR42871	0.529958	0.623479	-1.15344
asRNA:CR43152	0.926918	0.132878	-1.0598
asRNA:CR43159	-0.910796	-0.159288	1.07008
asRNA:CR43257	-0.645603	-0.506293	1.1519
asRNA:CR43425	-1.0551	0.933841	0.121259
asRNA:CR43426	1.12676	-0.782035	-0.344724
asRNA:CR43460	-0.57735	-0.57735	1.1547
asRNA:CR43463	1.10991	-0.279128	-0.830779
asRNA:CR43465	-1.06718	0.15168	0.915495
asRNA:CR43466	-0.771883	-0.357797	1.12968
asRNA:CR43468	0.562653	0.591924	-1.15458
asRNA:CR43474	-0.57735	-0.57735	1.1547
asRNA:CR43476	0	0	0
asRNA:CR43480	0	0	0
asRNA:CR43481	-0.163483	1.07167	-0.908185
asRNA:CR43629	1.07502	-0.90255	-0.172466
asRNA:CR43637	1.1547	-0.57735	-0.57735
asRNA:CR43683	-0.309433	-0.808709	1.11814
asRNA:CR43723	0.343232	-1.12642	0.783185
asRNA:CR43730	0.731582	0.407895	-1.13948
asRNA:CR43767	-0.925183	1.06095	-0.135763
asRNA:CR43786	-0.57735	-0.57735	1.1547
asRNA:CR43787	0.800974	0.319811	-1.12079
asRNA:CR43809	0.131225	0.927909	-1.05913
asRNA:CR43812	0.94409	0.103733	-1.04782
asRNA:CR43824	-0.57735	1.1547	-0.57735
asRNA:CR43833	0.500545	0.650888	-1.15143
asRNA:CR43864	-0.359852	1.13013	-0.770274
asRNA:CR43868	0.600653	0.55373	-1.15438
asRNA:CR43875	0.667766	0.481939	-1.14971
asRNA:CR43889	-0.535776	-0.61795	1.15373
asRNA:CR43906	0.700025	0.44527	-1.14529
asRNA:CR43916	0.856365	0.242623	-1.09899
asRNA:CR43933	1.11257	-0.288625	-0.823944
asRNA:CR43944	0.915659	0.151413	-1.06707
asRNA:CR43957	0.255079	0.847756	-1.10283
asRNA:CR43964	-0.000924226	1.00046	-0.999538
asRNA:CR43981	0	0	0
asRNA:CR44019	0.00899688	-1.00447	0.995471
asRNA:CR44021	1.06588	-0.148337	-0.917546
asRNA:CR44029	-0.276012	1.10902	-0.833005
asRNA:CR44030	-0.0361179	-0.981452	1.01757
asRNA:CR44031	0.70878	0.435055	-1.14383
asRNA:CR44045	-0.57735	1.1547	-0.57735
asRNA:CR44046	0.0103708	0.994774	-1.00515
asRNA:CR44047	-0.57735	-0.57735	1.1547
asRNA:CR44049	1.07967	-0.894419	-0.185255
asRNA:CR44053	0.780403	0.346838	-1.12724
asRNA:CR44054	-0.0521683	1.02506	-0.972895
asRNA:CR44064	0.871579	0.220154	-1.09173
asRNA:CR44065	0.625799	0.527506	-1.15331
asRNA:CR44067	1.08183	-0.191293	-0.890536
asRNA:CR44069	-0.57735	1.1547	-0.57735
asRNA:CR44093	1.00219	-0.00440021	-0.997793
asRNA:CR44095	0.580549	0.574146	-1.15469
asRNA:CR44114	-0.713174	-0.429885	1.14306
asRNA:CR44116	-0.57735	-0.57735	1.1547
asRNA:CR44119	-0.655941	-0.495015	1.15096
asRNA:CR44124	-0.607525	1.15417	-0.546641
asRNA:CR44134	0.739636	0.398103	-1.13774
asRNA:CR44137	-0.57735	-0.57735	1.1547
asRNA:CR44147	0.609092	0.545015	-1.15411
asRNA:CR44160	0.724429	-1.14093	0.416504
asRNA:CR44168	0.483512	0.666353	-1.14987
asRNA:CR44169	0.863695	0.231872	-1.09557
asRNA:CR44176	1.11783	-0.8096	-0.308229
asRNA:CR44179	0.28607	0.82579	-1.11186
asRNA:CR44182	-1.07168	0.163527	0.908158
asRNA:CR44201	-0.21428	-0.87549	1.08977
asRNA:CR44224	0	0	0
asRNA:CR44228	1.14743	-0.461633	-0.685792
asRNA:CR44266	1.06919	-0.156942	-0.91225
asRNA:CR44267	0.691037	0.455638	-1.14667
asRNA:CR44291	0.494586	0.656332	-1.15092
asRNA:CR44321	-0.57735	-0.57735	1.1547
asRNA:CR44340	-1.04436	0.0955761	0.94878
asRNA:CR44367	-0.732589	1.13927	-0.406678
asRNA:CR44368	1.03215	-0.0677463	-0.964404
asRNA:CR44370	0.365868	0.765542	-1.13141
asRNA:CR44372	-0.60971	-0.544374	1.15408
asRNA:CR44374	-1.0812	0.189532	0.891671
asRNA:CR44375	-0.963323	-0.0697066	1.03303
asRNA:CR44381	-0.406693	1.13927	-0.732576
asRNA:CR44382	-0.977218	-0.0441054	1.02132
asRNA:CR44386	0.0845582	0.955036	-1.03959
asRNA:CR44390	0.849006	0.253282	-1.10229
asRNA:CR44416	-1.09661	0.861491	0.235118
asRNA:CR44429	-0.796222	-0.326128	1.12235
asRNA:CR44431	-0.377851	1.13387	-0.75602
asRNA:CR44512	-0.64938	-0.502189	1.15157
asRNA:CR44599	-0.364902	1.13121	-0.766303
asRNA:CR44600	-0.57735	1.1547	-0.57735
asRNA:CR44690	0.515581	0.63699	-1.15257
asRNA:CR44703	-0.57735	-0.57735	1.1547
asRNA:CR44704	-0.48531	1.15004	-0.664734
asRNA:CR44724	0.875229	0.214674	-1.0899
asRNA:CR44793	-0.107996	1.04961	-0.941619
asRNA:CR44806	-0.514782	-0.637734	1.15252
asRNA:CR44807	0.822565	0.290529	-1.11309
asRNA:CR44841	0.101543	0.945355	-1.0469
asRNA:CR44843	-1.0797	0.894377	0.18532
asRNA:CR44849	1.09852	-0.241147	-0.857376
asRNA:CR44872	0.154224	0.913928	-1.06815
asRNA:CR44891	-0.57735	-0.57735	1.1547
asRNA:CR44892	-0.57735	-0.57735	1.1547
asRNA:CR44910	-0.57735	-0.57735	1.1547
asRNA:CR44911	-1.0706	0.160663	0.909942
asRNA:CR44959	0	0	0
asRNA:CR44960	0.104122	0.943865	-1.04799
asRNA:CR44961	-0.57735	-0.57735	1.1547
asRNA:CR44962	0.838663	0.268043	-1.10671
asRNA:CR44968	1.10583	-0.840768	-0.265059
asRNA:CR44969	0.959075	0.077357	-1.03643
asRNA:CR44972	0	0	0
asRNA:CR44976	-0.52426	-0.62886	1.15312
asRNA:CR44981	-0.601875	1.15435	-0.552473
asRNA:CR44982	1.1547	-0.57735	-0.57735
asRNA:CR44987	0.352222	0.776231	-1.12845
asRNA:CR44989	1.1547	-0.57735	-0.57735
asRNA:CR44992	0	0	0
asRNA:CR44996	-0.57735	-0.57735	1.1547
asRNA:CR44998	1.1547	-0.57735	-0.57735
asRNA:CR45000	-0.768389	-0.362253	1.13064
asRNA:CR45007	0.702312	0.442612	-1.14492
asRNA:CR45009	-1.14606	0.450887	0.695168
asRNA:CR45026	-1.01648	0.0338134	0.982664
asRNA:CR45028	0.183299	0.895671	-1.07897
asRNA:CR45044	1.01342	-0.0273972	-0.98602
asRNA:CR45053	-0.000730849	1.00037	-0.999634
asRNA:CR45108	0	0	0
asRNA:CR45124	1.0853	-0.884099	-0.201205
asRNA:CR45126	0.867345	0.226468	-1.09381
asRNA:CR45129	-0.57735	1.1547	-0.57735
asRNA:CR45131	-0.57735	-0.57735	1.1547
asRNA:CR45132	1.10778	-0.836053	-0.271728
asRNA:CR45135	-0.711088	-0.432343	1.14343
asRNA:CR45136	-0.57735	-0.57735	1.1547
asRNA:CR45139	0.768897	0.361606	-1.1305
asRNA:CR45140	-0.395312	-0.741917	1.13723
asRNA:CR45141	0.398015	0.739709	-1.13772
asRNA:CR45142	0.420723	0.720898	-1.14162
asRNA:CR45145	1.09964	-0.244718	-0.854925
asRNA:CR45149	-0.57735	1.1547	-0.57735
asRNA:CR45160	0.462273	0.68523	-1.1475
asRNA:CR45163	1.08498	-0.200281	-0.884703
asRNA:CR45164	-0.546402	-0.607755	1.15416
asRNA:CR45171	1.12737	-0.347425	-0.77995
asRNA:CR45175	0.87294	0.218115	-1.09106
asRNA:CR45182	-0.276798	-0.832444	1.10924
asRNA:CR45185	0.657149	0.493688	-1.15084
asRNA:CR45189	1.14318	-0.712513	-0.430664
asRNA:CR45190	1.02456	-0.0510846	-0.973479
asRNA:CR45195	0.811678	0.305416	-1.11709
asRNA:CR45198	1.03379	-0.071398	-0.962388
asRNA:CR45202	-0.834597	-0.273778	1.10837
asRNA:CR45208	1.1517	-0.647856	-0.503847
asRNA:CR45210	-0.57735	-0.57735	1.1547
asRNA:CR45214	0.842283	0.262905	-1.10519
asRNA:CR45264	0.226053	0.867624	-1.09368
asRNA:CR45272	-1.15393	0.540352	0.613574
asRNA:CR45275	0.93471	0.119789	-1.0545
asRNA:CR45281	1.14091	-0.724532	-0.416381
asRNA:CR45326	0	0	0
asRNA:CR45350	0.701029	0.444104	-1.14513
asRNA:CR45366	-0.57735	-0.57735	1.1547
asRNA:CR45367	0.339385	0.786139	-1.12552
asRNA:CR45396	-0.532046	-0.621499	1.15354
asRNA:CR45397	0.781844	0.344971	-1.12682
asRNA:CR45445	-1.15423	0.548597	0.605633
asRNA:CR45466	-0.580875	-0.573818	1.15469
asRNA:CR45467	0.587764	0.566874	-1.15464
asRNA:CR45468	-0.411122	1.14003	-0.728909
asRNA:CR45479	-0.875224	1.08991	-0.214682
asRNA:CR45485	0.243161	0.855995	-1.09916
asRNA:CR45501	-0.76835	-0.362302	1.13065
asRNA:CR45518	-0.57735	-0.57735	1.1547
asRNA:CR45520	0.556568	0.597886	-1.15445
asRNA:CR45528	1.15429	-0.550409	-0.603879
asRNA:CR45549	-1.14543	0.699194	0.446234
asRNA:CR45600	1.12435	-0.33442	-0.789933
asRNA:CR45604	0.584613	0.570057	-1.15467
asRNA:CR45612	-0.57735	-0.57735	1.1547
asRNA:CR45620	1.08446	-0.198773	-0.885686
asRNA:CR45682	-0.57735	1.1547	-0.57735
asRNA:CR45683	1.12291	-0.794485	-0.328426
asRNA:CR45686	0.360134	0.770053	-1.13019
asRNA:CR45713	1.1547	-0.57735	-0.57735
asRNA:CR45714	-0.380414	-0.753966	1.13438
asRNA:CR45778	-0.0334117	1.01629	-0.982875
asRNA:CR45789	0.421439	0.720297	-1.14174
asRNA:CR45798	0.681523	0.466484	-1.14801
asRNA:CR45800	1.13285	-0.372795	-0.760052
asRNA:CR45804	-0.57735	-0.57735	1.1547
asRNA:CR45806	0.831006	0.278811	-1.10982
asRNA:CR45813	0	0	0
asRNA:CR45814	0.131306	0.927861	-1.05917
asRNA:CR45815	-1.15384	0.61558	0.538257
asRNA:CR45818	0.744753	0.391827	-1.13658
asRNA:CR45822	-0.57735	-0.57735	1.1547
asRNA:CR45827	0	0	0
asRNA:CR45831	-0.57735	1.1547	-0.57735
asRNA:CR45835	-0.528971	-0.624414	1.15338
asRNA:CR45865	-0.751213	1.13505	-0.38384
asRNA:CR45870	-0.0702132	-0.963043	1.03326
asRNA:CR45871	-0.57735	-0.57735	1.1547
asRNA:CR45873	-1.14586	0.696461	0.449395
asRNA:CR45874	0.237219	-1.09728	0.860061
asRNA:CR45875	-0.57735	-0.57735	1.1547
asRNA:CR45889	-0.57735	1.1547	-0.57735
asRNA:CR45891	-1.14726	0.460257	0.686999
asRNA:CR45892	1.03313	-0.963196	-0.0699369
asRNA:CR45895	1.03586	-0.0760614	-0.959797
asRNA:CR45896	1.1547	-0.57735	-0.57735
asRNA:CR45907	-0.391258	1.13647	-0.745215
asRNA:CR45908	-0.995883	-0.00818441	1.00407
asRNA:CR45912	0.461855	0.685597	-1.14745
asRNA:CR45925	-0.272471	1.108	-0.835525
asRNA:CR45926	0.796166	0.326203	-1.12237
asRNA:CR45928	1.0962	-0.233852	-0.862352
asRNA:CR45929	0.693035	0.453344	-1.14638
asRNA:CR45943	0.38951	-1.13614	0.746633
asRNA:CR45951	0.912566	0.15643	-1.069
asRNA:CR45952	0.188698	-1.08091	0.892208
asRNA:CR45968	0.601598	0.552759	-1.15436
asRNA:CR45969	-0.57735	-0.57735	1.1547
asRNA:CR45970	-0.57735	1.1547	-0.57735
asRNA:CR45999	0.675167	0.473657	-1.14882
asRNA:CR46018	1.13124	-0.365086	-0.766158
asRNA:CR46020	-0.57735	1.1547	-0.57735
asRNA:CR46029	-0.57735	-0.57735	1.1547
asRNA:CR46033	0	0	0
asRNA:CR46044	-0.668461	-0.481165	1.14963
asRNA:CR46048	-1.05599	0.123447	0.932545
asRNA:CR46050	-0.57735	1.1547	-0.57735
asRNA:CR46055	-0.673207	-0.475858	1.14907
asRNA:CR46067	0.361525	0.768961	-1.13049
asRNA:CR46081	-0.988611	1.01101	-0.0224016
asRNA:CR46089	1.04505	-0.0972046	-0.947848
asRNA:CR46091	0.758923	0.374214	-1.13314
asRNA:CR46093	-0.487841	-0.66245	1.15029
asRNA:CR46096	0.61405	0.539856	-1.15391
asRNA:CR46097	0.535311	0.618393	-1.1537
asRNA:CR46099	-1.14876	0.675654	0.47311
asRNA:CR46104	0.5793	0.575399	-1.1547
asRNA:CR46105	1.1547	-0.57735	-0.57735
asRNA:CR46109	-0.800373	-0.320614	1.12099
asRNA:CR46133	0.713077	0.429999	-1.14308
asRNA:CR46134	0.195253	0.887973	-1.08323
asRNA:CR46135	0.920322	0.143789	-1.06411
asRNA:CR46137	1.12379	-0.332044	-0.791741
asRNA:CR46138	0.593814	0.560728	-1.15454
asRNA:CR46140	0.980104	0.0386694	-1.01877
asRNA:CR46145	-0.57735	1.1547	-0.57735
asRNA:CR46255	0.775318	0.353396	-1.12871
asRNA:CR46262	1.12031	-0.31791	-0.802398
asRNA:CR46354	0.85311	0.247354	-1.10046
ast	0.689015	0.457954	-1.14697
AstA	-1.0896	0.875824	0.213778
AstA-R1	1.1197	-0.315495	-0.804202
asun	0.284803	0.826704	-1.11151
Asx	0.152798	0.914807	-1.06761
Atac1	-0.157398	1.06937	-0.911967
Atac2	0.425544	-1.14239	0.716843
Atac3	1.14101	-0.416951	-0.724055
ATbp	0.620936	0.532638	-1.15357
Ate1	0.596915	0.557562	-1.15448
Atet	-0.00775281	1.00385	-0.996101
Atf-2	-0.410281	1.13989	-0.729606
Atf3	-0.579018	1.1547	-0.575681
Atf6	-1.14174	0.720296	0.42144
Atg1	0.267875	0.838782	-1.10666
Atg10	-1.1525	0.514523	0.637975
Atg101	0.920066	0.14421	-1.06428
Atg12	-1.1177	0.809975	0.307722
Atg13	0.626916	0.526323	-1.15324
Atg14	0.781506	0.345411	-1.12692
Atg16	0.736355	0.402106	-1.13846
Atg17	-0.68167	-0.466317	1.14799
Atg18a	0.874458	0.215835	-1.09029
Atg18b	0.0747958	0.960502	-1.0353
Atg2	0.664567	0.485496	-1.15006
Atg3	0.982932	0.0333035	-1.01624
Atg4a	0.555037	0.59938	-1.15442
Atg4b	0.730999	0.408601	-1.1396
Atg5	0.724685	0.416197	-1.14088
Atg6	0.653998	0.497145	-1.15114
Atg7	0.0711818	0.962507	-1.03369
Atg8a	-0.673973	-0.474999	1.14897
Atg8b	-1.09097	0.217862	0.873109
Atg9	0.938424	0.113471	-1.0519
atilla	-0.769204	-0.361215	1.13042
atk	-1.154	0.611825	0.542175
atl	-0.839967	1.10616	-0.266196
atms	-0.699111	1.14544	-0.446329
Atox1	0.431158	0.712094	-1.14325
ATP6AP2	0.529313	0.62409	-1.1534
ATP7	0.932775	0.123059	-1.05583
ATP8A	0.653357	0.497848	-1.1512
ATP8B	-0.00461412	1.0023	-0.997685
Atpalpha	0.82365	0.289032	-1.11268
ATPCL	1.12141	-0.322314	-0.799096
ATPsynB	0.502945	0.648685	-1.15163
ATPsynbeta	0.52327	0.629791	-1.15306
ATPsynbetaL	-0.57735	1.1547	-0.57735
ATPsynC	-0.72445	-0.416479	1.14093
ATPsynCF6	0.524416	0.628713	-1.15313
ATPsynCF6L	-0.57735	1.1547	-0.57735
ATPsynD	0.528328	0.625022	-1.15335
ATPsyndelta	0.462696	0.684859	-1.14755
ATPsynE	-0.65031	-0.501176	1.15149
ATPsynepsilonL	-0.771678	1.12974	-0.358059
ATPsynF	-0.765744	-0.365611	1.13136
ATPsynG	0.513891	0.638564	-1.15245
ATPsyngamma	0.600185	0.554211	-1.1544
ATPsynGL	0.238419	0.859242	-1.09766
ATPsynO	0.482981	0.666831	-1.14981
AttA	-0.57735	-0.57735	1.1547
AttB	-0.694552	-0.451597	1.14615
AttC	-0.57735	1.1547	-0.57735
AttD	-1.11329	0.291255	0.822039
Atu	0.868797	0.224308	-1.0931
Atx-1	-1.14836	0.678818	0.469544
Atx2	0.721538	0.419959	-1.1415
Atxn7	0.975966	0.0464485	-1.02241
aub	-0.184398	1.07937	-0.894968
aurA	0.265382	0.84054	-1.10592
aurB	-0.0223996	1.01101	-0.988612
aust	0	0	0
aux	0.295419	0.81901	-1.11443
ave	-1.14391	0.708342	0.435569
Aven	1.15451	-0.595215	-0.559299
awd	-0.669271	-0.480262	1.14953
Awh	0	0	0
axed	0.408793	0.73084	-1.13963
Axn	0.272737	0.835337	-1.10807
Axs	-0.954831	-0.0849219	1.03975
Axud1	-0.401692	-0.736694	1.13839
az2	-0.0556483	1.02666	-0.971014
b	0.578567	0.576133	-1.1547
B-H2	0	0	0
B4	-0.654672	-0.496408	1.15108
B52	-0.660617	-0.489868	1.15048
B9d1	1.15442	-0.599425	-0.554991
bab1	0.565431	0.589188	-1.15462
bab2	-0.57735	-0.57735	1.1547
babo	-1.01265	0.0258	0.98685
babos	-0.57735	-0.57735	1.1547
Bacc	-0.57226	-0.582425	1.15469
baf	-0.805431	-0.313847	1.11928
bai	-0.989442	-0.0207915	1.01023
Balat	0	0	0
Baldspot	-0.126938	-0.93047	1.05741
ball	0.0713504	-1.03376	0.962414
bam	-0.387512	1.13576	-0.74825
Bap111	0.698303	0.447265	-1.14557
Bap170	0.672273	0.476905	-1.14918
Bap55	-0.524814	-0.628339	1.15315
Bap60	0.969444	0.0585405	-1.02798
barc	-0.589278	-0.56534	1.15462
bark	-0.75376	-0.380672	1.13443
barr	0.592147	0.562426	-1.15457
baz	0.690859	0.455842	-1.1467
bb8	-0.723418	1.14113	-0.417714
bbc	-0.404945	-0.734018	1.13896
bbg	-0.662222	-0.488094	1.15032
BBIP1	-0.298253	1.11519	-0.81694
BBS8	-0.830262	1.11011	-0.27985
bbx	0.695603	0.450385	-1.14599
bc10	0.973339	0.0513444	-1.02468
BCAS2	-0.805587	-0.313637	1.11922
bchs	0.347059	0.780232	-1.12729
BCL7-like	0.138199	0.923713	-1.06191
bcn92	-0.721165	-0.420404	1.14157
Bdbt	-0.69122	-0.455427	1.14665
bdg	-0.220009	1.09169	-0.871676
bdl	-0.57735	1.1547	-0.57735
Bdp1	1.00335	-0.0067291	-0.996618
be	0.693924	-1.14624	0.45232
BEAF-32	0.0699975	-1.03316	0.963162
beag	1.13328	-0.758374	-0.374902
beat-Ib	-0.57735	-0.57735	1.1547
beat-Ic	-0.57735	-0.57735	1.1547
beat-IIIc	-0.57735	-0.57735	1.1547
beat-VI	0	0	0
beat-VII	0	0	0
beg	-0.619214	-0.534449	1.15366
bel	-1.12988	0.771164	0.358716
Bem46	-0.588533	-0.566095	1.15463
ben	0.513408	0.639014	-1.15242
Best1	-0.513168	-0.639236	1.1524
Best2	0	0	0
Bet1	-0.585163	-0.569502	1.15467
Bet3	-0.111199	1.05095	-0.939753
Bet5	-0.987776	-0.0240153	1.01179
beta-Man	0.808238	0.310068	-1.11831
beta-PheRS	-0.663826	-0.486318	1.15014
beta-Spec	0.744984	0.391542	-1.13653
beta'COP	0.682712	0.465135	-1.14785
beta3GalTII	-0.788704	-0.336031	1.12474
beta4GalNAcTA	0.202024	0.883564	-1.08559
beta4GalNAcTB	0.0184252	0.99066	-1.00909
beta4GalT7	0.762992	0.369092	-1.13208
betaCOP	0.884752	0.200205	-1.08496
betaggt-I	-1.11438	0.295226	0.81915
betaggt-II	0.2921	0.821425	-1.11353
betaGlu	0.466685	0.681346	-1.14803
betaTub56D	-0.774531	-0.354406	1.12894
betaTub60D	-0.773002	-0.356366	1.12937
betaTub85D	-0.396184	-0.741205	1.13739
betaTub97EF	-0.0350433	-0.982018	1.01706
Bgb	0.809543	0.308306	-1.11785
bgcn	-0.276725	-0.832497	1.10922
bgm	-0.63744	-0.515098	1.15254
BHD	0.615785	0.538042	-1.15383
bi	-1.14959	0.480847	0.668746
BI-1	-0.0177654	1.00876	-0.990999
bib	-0.559959	1.15453	-0.594569
bic	-0.190599	-0.890983	1.08158
BicD	-0.606995	-0.547189	1.15418
bif	-0.661662	-0.488713	1.15038
BigH1	1.04083	-0.953438	-0.087389
bigmax	-1.03831	0.0816306	0.956683
Bin1	-0.848747	-0.253654	1.1024
bin3	-0.526186	-0.627045	1.15323
bip1	-0.898217	-0.179305	1.07752
bip2	-0.605146	-0.549101	1.15425
Bka	-0.686942	-0.460322	1.14726
blanks	-1.0646	0.919567	0.145028
Blimp-1	0.975639	0.0470601	-1.0227
Blm	0.788337	0.336511	-1.12485
Blos1	0.403218	-1.13866	0.73544
Blos2	-1.15011	0.485975	0.664135
Blos3	-0.451086	1.14608	-0.694995
Blos4	-0.826964	-0.284441	1.11141
blot	-0.864714	-0.230367	1.09508
blow	0.559899	0.594628	-1.15453
blp	-0.667177	-0.482595	1.14977
blw	-0.456559	-0.690233	1.14679
bma	-0.412161	1.14021	-0.728046
Bmcp	-0.964617	-0.0673602	1.03198
bmm	-1.04534	0.0978711	0.947466
bnb	0.215969	0.874369	-1.09034
bnl	-0.292289	1.11358	-0.821288
boca	-0.673914	-0.475066	1.14898
bocks	0.585278	0.569386	-1.15466
BOD1	0.687976	0.459141	-1.14712
boi	-0.131723	1.05933	-0.927611
bol	-0.974307	-0.0495435	1.02385
Bom1	0.111448	0.939607	-1.05106
Bom3	-0.57735	1.1547	-0.57735
bon	0.339015	0.786422	-1.12544
bond	-0.57735	1.1547	-0.57735
bonsai	-1.14805	0.466888	0.681166
bor	-0.493552	-0.657273	1.15083
bora	0.641486	0.510745	-1.15223
BORCS5	0.959946	0.0757946	-1.03574
BORCS6	0.315501	0.804198	-1.1197
BORCS7	0.00112364	-1.00056	0.999438
borr	-0.086154	1.04029	-0.954136
botv	0.829453	0.280978	-1.11043
bou	-1.10088	0.248683	0.852192
bowl	-0.57735	-0.57735	1.1547
BoYb	0.966315	0.0642699	-1.03058
br	0.276572	0.832606	-1.10918
Br140	0.635676	0.51699	-1.15267
brat	-0.511826	-0.640483	1.15231
Brca2	-0.537278	-0.616516	1.15379
Brd	0	0	0
Brd8	1.03678	-0.0781472	-0.958634
Bre1	0.428101	0.714684	-1.14278
Brf	0.39034	0.74596	-1.1363
brk	-1.0639	0.143261	0.920643
brm	0.460133	0.687107	-1.14724
Brms1	0.532195	-1.15355	0.621357
brn	-0.813964	-0.302311	1.11628
brp	0.292573	0.821081	-1.11365
bru1	-0.57735	1.1547	-0.57735
bru2	0	0	0
bru3	0.57058	0.584094	-1.15467
Bruce	0.456331	0.690432	-1.14676
brun	0.742788	0.394243	-1.13703
brv3	1.03096	-0.965858	-0.0651028
BRWD3	0.937453	0.115128	-1.05258
brwl	-0.455979	-0.69074	1.14672
bs	0.678104	0.470349	-1.14845
bsf	-0.294383	1.11415	-0.819764
Bsg	0.481264	0.668372	-1.14964
Bsg25D	0.69903	0.446423	-1.14545
bsk	0.494858	-1.15094	0.656085
bt	0.633101	0.519744	-1.15284
BTBD9	0.345234	0.781642	-1.12688
BtbVII	0.690955	0.455731	-1.14669
btd	0	0	0
BthD	-0.357664	-0.771988	1.12965
Btk29A	0.327945	0.794849	-1.12279
btl	-0.0339138	1.01653	-0.982612
btsz	0.168687	0.904928	-1.07362
btz	0.244277	0.855229	-1.09951
Bub1	0.653663	0.497513	-1.15118
Bub3	-1.10582	0.265045	0.840778
BubR1	0.238048	0.859495	-1.09754
bug	-1.04602	0.946538	0.0994869
Bug22	-0.442497	-0.702411	1.14491
BuGZ	0.86638	0.2279	-1.09428
bun	0.803363	-1.11998	0.316619
bur	-0.514491	-0.638006	1.1525
bves	1.0449	-0.0968466	-0.948053
bw	0.760898	0.371732	-1.13263
bwa	0.786075	0.339468	-1.12554
Bx	0.169764	0.904251	-1.07402
Bx42	-0.145368	1.06473	-0.91936
by	0.982594	0.0339478	-1.01654
bys	1.11742	-0.306658	-0.810761
c(2)M	-0.252885	1.10217	-0.849281
c(3)G	-1.08254	0.889239	0.193299
c11.1	0.399339	0.738625	-1.13796
c12.1	-1.03956	0.0844687	0.955086
c12.2	-1.14598	0.695636	0.450348
C1GalTA	0.693744	0.452528	-1.14627
C3G	-1.09601	0.862766	0.233242
ca	0.177615	0.899291	-1.07691
Ca-alpha1D	-0.311928	1.11879	-0.806858
Ca-alpha1T	1.1517	-0.503803	-0.647897
Ca-Ma2d	-0.57735	1.1547	-0.57735
CaBP1	-0.270108	-0.837202	1.10731
cac	0.528566	0.624797	-1.15336
cact	-0.361483	-0.768994	1.13048
cactin	-1.07921	0.18396	0.895248
Cad86C	-0.608556	-0.545572	1.15413
Cad87A	0.409581	0.730187	-1.13977
Cad96Ca	-1.02376	0.0493472	0.974413
Cad99C	-0.614301	-0.539594	1.15389
CadN	0	0	0
CadN2	0	0	0
Cadps	0.615948	0.537873	-1.15382
Caf1-105	-1.14037	0.41311	0.727257
Caf1-180	-1.00199	0.0039965	0.997996
Caf1-55	0.521712	0.631256	-1.15297
cag	-0.556787	-0.597673	1.15446
CAH1	-1.03316	0.0699983	0.963162
CAH13	-0.57735	1.1547	-0.57735
CAH2	0.320702	0.800306	-1.12101
CAH3	0.431247	0.712018	-1.14327
CAH7	-0.57735	-0.57735	1.1547
CAHbeta	0.545068	0.609041	-1.15411
cal1	0.489529	-1.15045	0.660924
CalpA	-0.918937	1.065	-0.146062
CalpB	0.227977	0.866328	-1.0943
CalpC	0.983335	0.0325353	-1.01587
Calr	0.54515	0.608962	-1.15411
Cals	0.865481	-1.09471	0.229231
Calx	0.601202	0.553166	-1.15437
calypso	1.08736	-0.20716	-0.880195
Cam	-0.18936	-0.891782	1.08114
CaMKI	-1.10759	0.271065	0.836524
CaMKII	-0.670535	-0.478849	1.14938
Camp	-0.535325	1.1537	-0.61838
Camta	1.13053	-0.361716	-0.768811
can	0	0	0
cana	0.063892	0.966522	-1.03041
CanA-14F	0.901859	0.173561	-1.07542
CanB	0	0	0
CanB2	0.393256	0.743591	-1.13685
Cand1	-1.06233	0.139256	0.923073
CAP	-0.555585	-0.598846	1.15443
Cap-D2	0.567028	0.587611	-1.15464
Cap-D3	0.0669519	0.964842	-1.03179
Cap-G	0.613026	0.540924	-1.15395
Cap-H2	0.576756	0.577944	-1.1547
Caper	-0.135173	1.06071	-0.925538
Capr	0.377461	0.756331	-1.13379
caps	1.13287	-0.759947	-0.372928
capt	-0.560628	1.15454	-0.593913
capu	-0.84083	-0.26497	1.1058
car	0.774034	0.355043	-1.12908
CARPB	0.201402	0.883971	-1.08537
CarT	0.354328	0.774591	-1.12892
CASK	0.91583	0.151134	-1.06696
casp	-0.612966	1.15395	-0.540986
cass	0.551379	0.602938	-1.15432
Cat	0.567952	0.586698	-1.15465
cathD	0.402562	0.73598	-1.13854
Catsup	-0.597709	1.15446	-0.556749
caup	-0.858494	-0.239514	1.09801
cav	-0.4322	-0.711209	1.14341
caz	0.284839	0.826678	-1.11152
cbc	0.128903	-1.0582	0.929298
Cbl	0.56189	0.592674	-1.15456
CBP	0.666087	0.483808	-1.14989
Cbp20	-0.922841	-0.13964	1.06248
Cbp53E	0	0	0
Cbp80	0.472009	0.676633	-1.14864
cbs	0.0223952	0.988614	-1.01101
Cbs	-0.273042	1.10816	-0.83512
cbt	1.06021	-0.133918	-0.926293
Cby	-0.811679	-0.305415	1.11709
Cc2d2a	-0.396597	1.13746	-0.740867
CCAP	-0.339333	-0.786178	1.12551
CCDC53	0.682103	0.465826	-1.14793
Ccdc56	-0.477308	-0.671913	1.14922
Ccdc58	-0.628669	-0.524464	1.15313
Ccdc85	0.863198	0.232604	-1.0958
CCHa2	0.962434	0.071314	-1.03375
Cchl	-0.635651	-0.517017	1.15267
Ccm3	-0.339337	-0.786175	1.12551
Ccs	-1.11629	0.302368	0.813922
CCT1	0.520303	0.632577	-1.15288
CCT2	-0.707638	-0.436394	1.14403
CCT3	0.548117	0.606098	-1.15422
CCT4	-0.68786	-0.459274	1.14713
CCT5	0.582438	0.572248	-1.15469
CCT6	0.612834	0.541124	-1.15396
CCT7	0.566875	0.587763	-1.15464
CCT8	0.868351	-1.09332	0.224972
Ccz1	1.14492	-0.702318	-0.442605
cd	-1.0624	0.139448	0.922957
CD98hc	-0.487467	-0.662788	1.15026
Cda5	-0.57735	1.1547	-0.57735
CDase	0.619378	0.534277	-1.15365
cdc14	0.0620945	0.967506	-1.0296
Cdc16	0.805864	0.313265	-1.11913
Cdc23	0.848037	0.254675	-1.10271
Cdc27	0.665954	0.483955	-1.14991
Cdc2rk	0.186102	0.893876	-1.07998
Cdc37	-0.923995	-0.137731	1.06173
Cdc42	0.546205	0.607945	-1.15415
CDC45L	-0.38566	1.13541	-0.749746
Cdc5	0.844921	0.259142	-1.10406
CDC50	0.503823	0.647879	-1.1517
Cdc6	-0.902974	-0.171793	1.07477
Cdc7	0.834117	0.274452	-1.10857
Cdep	0.0380341	0.98044	-1.01847
CdGAPr	-0.176829	1.07662	-0.89979
cdi	0.928836	0.129676	-1.05851
cDIP	-0.57735	1.1547	-0.57735
Cdk1	-0.8917	-0.189488	1.08119
Cdk12	-1.08484	0.19987	0.884971
Cdk2	0.317969	0.802354	-1.12032
CDK2AP1	1.08544	-0.883838	-0.201605
Cdk4	0.907185	0.165085	-1.07227
Cdk5	-0.777514	-0.350569	1.12808
Cdk5alpha	1.14988	-0.483648	-0.666231
Cdk7	-0.780522	-0.346684	1.12721
Cdk8	0.570977	0.5837	-1.15468
Cdk9	1.07225	-0.165031	-0.907218
Cdlc2	0.978458	-1.02023	0.0417751
cdm	0.66457	0.485492	-1.15006
Cds	0.692427	0.454042	-1.14647
Cec2	-0.57735	-0.57735	1.1547
CecA1	-0.581052	-0.57364	1.15469
CecA2	-0.579967	-0.574729	1.1547
CecB	-0.563893	-0.590704	1.1546
CecC	-0.805496	-0.313759	1.11925
Ced-12	0.497481	0.653692	-1.15117
ced-6	0.586056	0.5686	-1.15466
Cen	0.769059	0.3614	-1.13046
CenB1A	0.849873	0.252032	-1.10191
CenG1A	-0.624915	-0.528442	1.15336
Cenp-C	0.942376	0.106691	-1.04907
Cep135	-1.15264	0.636046	0.516593
cep290	-0.252964	-0.849227	1.10219
Cep89	-0.57735	-0.57735	1.1547
Cep97	0.108782	0.941162	-1.04994
cer	0.357737	0.77193	-1.12967
Cerk	-0.476844	-0.672328	1.14917
cert	-0.245324	1.09983	-0.854508
cerv	-0.229026	-0.86562	1.09465
Cf2	-0.260821	1.10457	-0.843745
Cfp1	0.091465	0.951125	-1.04259
cg	-0.23632	-0.860673	1.09699
CG10005	-0.57735	-0.57735	1.1547
CG10011	0.369005	0.763061	-1.13207
CG10026	0.682947	0.464868	-1.14782
CG10031	-1.1195	0.804791	0.314705
CG10038	-1.14564	0.447796	0.697844
CG10041	1.04429	-0.948874	-0.0954125
CG10050	-0.988753	-0.0221261	1.01088
CG10053	-0.149186	1.06621	-0.917026
CG10055	-0.582063	-0.572625	1.15469
CG10063	0.279708	0.830364	-1.11007
CG10064	0.63584	0.516814	-1.15265
CG10068	0.335434	0.78916	-1.12459
CG10075	-0.507515	-0.644475	1.15199
CG10077	0.509065	0.643041	-1.15211
CG10082	-1.13273	0.372206	0.760521
CG10086	-1.14839	0.678622	0.469765
CG10089	0.308868	0.809128	-1.118
CG10096	1.11868	-0.807163	-0.311517
CG10098	-0.733571	-0.405487	1.13906
CG10103	-0.694505	-0.451652	1.14616
CG10126	0.0418831	0.9784	-1.02028
CG10132	0.508436	0.643623	-1.15206
CG10137	-0.500048	1.15139	-0.651344
CG10139	-0.654668	-0.496412	1.15108
CG10147	-0.298463	1.11525	-0.816786
CG10151	1.10992	-0.830748	-0.279172
CG10165	-0.728808	-0.411243	1.14005
CG10166	-1.10617	0.266217	0.839952
CG10171	-0.0978861	1.04534	-0.947457
CG10184	-0.618876	-0.534804	1.15368
CG10185	-0.57735	-0.57735	1.1547
CG10188	0.60198	0.552365	-1.15435
CG10189	-0.396327	-0.741088	1.13742
CG10194	-0.196599	1.0837	-0.8871
CG10195	-0.750484	-0.384745	1.13523
CG10208	1.15323	-0.627053	-0.526178
CG10209	1.09463	-0.228983	-0.865649
CG10214	-0.71705	-0.425299	1.14235
CG10222	-1.08535	0.201324	0.884021
CG10232	-0.81019	-0.307432	1.11762
CG10237	-0.682697	1.14785	-0.465152
CG1024	1.11533	-0.298749	-0.816577
CG10252	1.09696	-0.236216	-0.860744
CG10254	-1.01278	0.986714	0.0260618
CG10265	-0.964007	-0.0684668	1.03247
CG10268	0.395129	-1.13719	0.742065
CG10274	0.139645	0.922838	-1.06248
CG10283	-0.8286	-0.282167	1.11077
CG10286	-0.842796	-0.262174	1.10497
CG10307	-1.12403	0.790952	0.333081
CG10311	0.675794	0.472953	-1.14875
CG10321	0.645954	0.505912	-1.15187
CG10324	0.474927	-1.14896	0.674037
CG10333	-0.757118	-0.376476	1.13359
CG10336	-0.219491	-0.872022	1.09151
CG10337	-0.307048	-0.810473	1.11752
CG10338	-0.757354	1.13354	-0.376182
CG10340	-0.474041	-0.674826	1.14887
CG10341	-0.107488	1.0494	-0.941914
CG10343	-0.607003	-0.547181	1.15418
CG10344	-0.805491	1.11926	-0.313765
CG10347	-0.943982	-0.103921	1.0479
CG10353	-0.448171	-0.69752	1.14569
CG10359	0.371656	0.760958	-1.13261
CG10361	-0.57735	1.1547	-0.57735
CG10365	0.754469	0.379788	-1.13426
CG10366	0.810377	0.307178	-1.11756
CG10375	-0.536517	-0.617243	1.15376
CG10376	-0.732167	-0.407187	1.13935
CG10383	0.48289	-1.1498	0.666912
CG10384	-0.57735	1.1547	-0.57735
CG10395	-0.799573	-0.321678	1.12125
CG10405	1.15416	-0.607555	-0.54661
CG10407	0.931089	0.125898	-1.05699
CG10413	0.628361	0.524791	-1.15315
CG10417	-0.479829	-0.669658	1.14949
CG10418	-1.00909	0.0184426	0.990651
CG10425	0.0206373	0.989522	-1.01016
CG10428	0.566145	0.588483	-1.15463
CG10431	0.52523	0.627947	-1.15318
CG10433	-0.224093	-0.868941	1.09303
CG10435	-0.659115	-0.491524	1.15064
CG10444	-0.631574	1.15295	-0.521373
CG10445	-0.87032	1.09236	-0.222037
CG10462	-1.1524	0.513104	0.639296
CG10463	-0.773883	-0.355237	1.12912
CG10465	-0.946453	-0.0996351	1.04609
CG10466	-0.737819	-0.400323	1.13814
CG10467	-0.930496	1.05739	-0.126895
CG10469	0.369927	0.76233	-1.13226
CG10470	-1.14435	0.705764	0.438587
CG10472	-0.57735	1.1547	-0.57735
CG10492	0.781247	0.345746	-1.12699
CG10494	0.803968	0.315809	-1.11978
CG10495	0.234777	0.861724	-1.0965
CG10505	0.825016	0.287144	-1.11216
CG10508	0.671455	0.477821	-1.14928
CG10512	-0.509197	1.15212	-0.64292
CG10516	-0.913964	-0.154166	1.06813
CG10527	-0.530185	-0.623265	1.15345
CG10543	0.426641	0.715918	-1.14256
CG10550	1.10484	-0.26173	-0.843108
CG10555	-0.968956	1.02839	-0.0594365
CG10561	0.932416	0.123666	-1.05608
CG10565	0.552453	-1.15435	0.601895
CG10576	-0.754817	-0.379354	1.13417
CG10581	1.00341	-0.00684574	-0.99656
CG10584	0.733264	0.405859	-1.13912
CG10589	0	0	0
CG10600	-1.06412	0.143823	0.920301
CG10602	-0.979373	-0.04005	1.01942
CG10616	0.171426	0.903206	-1.07463
CG10621	1.04778	-0.944149	-0.103632
CG10623	0.655416	0.495592	-1.15101
CG10628	0.923332	0.138828	-1.06216
CG10631	0.607794	0.546362	-1.15416
CG10638	-0.437883	1.14425	-0.706366
CG10646	-1.1452	0.444608	0.700595
CG10650	-0.57735	-0.57735	1.1547
CG10654	0.508521	0.643545	-1.15207
CG10657	-1.10509	0.262572	0.842517
CG10660	0.45481	0.691758	-1.14657
CG10663	-0.57735	-0.57735	1.1547
CG10669	0.777297	0.35085	-1.12815
CG10672	-1.12012	0.31715	0.802966
CG10674	-1.12426	0.334016	0.790241
CG10681	-1.03521	0.960613	0.0745962
CG10694	-0.990354	1.00938	-0.0190214
CG10702	0.386069	0.749416	-1.13549
CG10730	-0.57735	1.1547	-0.57735
CG10731	-1.02075	0.977875	0.042872
CG10734	-0.57735	1.1547	-0.57735
CG10737	-0.972139	-0.0535692	1.02571
CG10738	0.620049	0.533572	-1.15362
CG1074	-0.844461	-0.259799	1.10426
CG10747	0.355756	0.773478	-1.12923
CG10764	-1.15469	0.573856	0.580837
CG1077	0	0	0
CG10778	-0.731087	-0.408494	1.13958
CG10795	1.1078	-0.271802	-0.836
CG10799	-0.57735	1.1547	-0.57735
CG10801	-0.57735	-0.57735	1.1547
CG10802	1.15461	-0.589822	-0.564788
CG10803	0.543621	0.610435	-1.15406
CG10804	-0.57735	1.1547	-0.57735
CG10809	-1.14372	0.434252	0.709464
CG10814	-1.13806	0.738184	0.399877
CG10822	-0.57735	1.1547	-0.57735
CG10841	-0.57735	-0.57735	1.1547
CG10859	0.687833	0.459305	-1.14714
CG10862	1.10486	-0.261789	-0.843066
CG10863	-0.595958	-0.558541	1.1545
CG10866	0.609409	0.544687	-1.1541
CG10869	-0.57735	-0.57735	1.1547
CG10874	0.927425	0.132033	-1.05946
CG10877	0.738501	0.39949	-1.13799
CG10889	0.866263	0.228073	-1.09434
CG10898	-0.135093	-0.925586	1.06068
CG1090	0.988214	0.0231685	-1.01138
CG10903	-0.565763	-0.58886	1.15462
CG10904	0.721954	-1.14142	0.419464
CG10907	-0.253371	-0.848944	1.10231
CG10914	1.0915	-0.219466	-0.872039
CG10916	-0.513015	1.15239	-0.639379
CG1092	0.555478	0.598949	-1.15443
CG10927	-1.11638	0.302703	0.813676
CG10931	0.80777	0.310699	-1.11847
CG10932	0.131695	0.927627	-1.05932
CG10936	0	0	0
CG10939	0.500091	0.651304	-1.1514
CG10947	-0.622061	-0.531454	1.15351
CG10948	0.309845	-1.11825	0.808404
CG10949	1.01661	-0.982519	-0.0340905
CG10958	-1.06457	0.144955	0.919612
CG10959	1.06417	-0.143933	-0.920234
CG10960	-0.845417	-0.258433	1.10385
CG10962	0.915579	0.151543	-1.06712
CG10970	0.365392	0.765917	-1.13131
CG10973	-0.695578	-0.450415	1.14599
CG10979	0.35581	0.773436	-1.12925
CG10984	-1.14633	0.453006	0.693328
CG11000	-0.802081	1.12041	-0.318333
CG11007	-0.0483859	-0.974929	1.02331
CG1103	0.88224	0.204046	-1.08629
CG11030	-0.48289	-0.666912	1.1498
CG11034	-0.57735	-0.57735	1.1547
CG11035	0.485087	0.664935	-1.15002
CG1105	-0.674252	1.14894	-0.474685
CG11050	-0.656064	-0.494881	1.15094
CG11052	-1.10758	0.271032	0.836547
CG11068	0.664947	0.485074	-1.15002
CG11069	0	0	0
CG11070	1.00539	-0.0108603	-0.994526
CG11076	-0.566673	-0.587962	1.15464
CG11077	-1.11378	0.293043	0.820739
CG11089	-1.05226	0.11436	0.937904
CG11095	0.505821	0.646039	-1.15186
CG11103	0.917635	0.148192	-1.06583
CG11106	0.98942	0.0208341	-1.01025
CG11109	-0.83749	-0.269701	1.10719
CG11110	-0.358536	-0.771305	1.12984
CG11122	0.436746	0.707337	-1.14408
CG11123	0.882777	0.203226	-1.086
CG11125	-0.0753475	1.03554	-0.960195
CG11127	-0.495456	1.151	-0.65554
CG11134	-0.428327	-0.714493	1.14282
CG11137	-0.836744	-0.270754	1.1075
CG11141	-0.529877	1.15343	-0.623557
CG11151	-0.981787	1.01727	-0.0354807
CG11155	0.35944	0.770597	-1.13004
CG11158	-1.12801	0.350256	0.777757
CG1116	0.71284	-1.14312	0.430279
CG11164	0.790554	0.333605	-1.12416
CG11168	0.855828	0.243404	-1.09923
CG11170	0.834933	0.273304	-1.10824
CG11178	-0.408003	1.1395	-0.731493
CG11180	-0.634394	-0.518361	1.15276
CG11200	-0.250531	1.10144	-0.850914
CG11236	-0.599371	-0.555046	1.15442
CG1124	0.199071	0.885491	-1.08456
CG11241	-0.797166	1.12204	-0.324877
CG11247	-1.0854	0.201483	0.883918
CG11248	0.421493	0.720252	-1.14174
CG11249	1.01956	-0.0403317	-0.979224
CG11257	-1.01071	0.988932	0.0217804
CG11267	-0.701615	-0.443423	1.14504
CG11275	1.1547	-0.57735	-0.57735
CG11279	-1.05084	0.110931	0.939909
CG1129	-0.83928	-0.267168	1.10645
CG11291	-0.57735	1.1547	-0.57735
CG11294	-0.64023	1.15233	-0.512098
CG11307	0.0536845	-1.02576	0.972076
CG11309	-0.0732265	1.0346	-0.961374
CG11313	0.974023	0.050073	-1.0241
CG11318	-0.57735	-0.57735	1.1547
CG11319	-0.57735	-0.57735	1.1547
CG11322	0	0	0
CG11327	0.663696	0.486462	-1.15016
CG11334	0.969874	0.0577483	-1.02762
CG11342	-0.263673	-0.841743	1.10542
CG11350	1.1547	-0.57735	-0.57735
CG11353	-0.57735	-0.57735	1.1547
CG11357	0.103271	-1.04763	0.944357
CG1136	0	0	0
CG11360	-1.09165	0.871739	0.219915
CG11362	-0.57735	1.1547	-0.57735
CG11367	-0.310623	1.11845	-0.807827
CG1137	0.827085	0.284274	-1.11136
CG11373	1.03888	-0.0829225	-0.955957
CG11374	-0.164818	1.07217	-0.907352
CG11377	-0.656171	-0.494763	1.15093
CG11378	0	0	0
CG11396	0.254753	0.847982	-1.10274
CG11398	1.09887	-0.242237	-0.85663
CG11399	0.583975	0.5707	-1.15468
CG11400	-1.07438	0.903635	0.170745
CG11403	0.522197	0.6308	-1.153
CG11406	1.06316	-0.141356	-0.921801
CG11413	1.09474	-0.229331	-0.865414
CG11414	1.12597	-0.341282	-0.784683
CG11417	-0.537658	-0.616153	1.15381
CG1142	-0.632485	-0.520401	1.15289
CG11426	-0.57735	-0.57735	1.1547
CG1143	-0.412177	-0.728033	1.14021
CG11436	0.204493	0.881947	-1.08644
CG11438	0	0	0
CG11444	-0.690713	-0.456009	1.14672
CG11447	-0.526354	-0.626886	1.15324
CG11454	-0.412055	-0.728134	1.14019
CG11456	-0.990945	-0.0178714	1.00882
CG1146	-0.347462	-0.779921	1.12738
CG11474	0.0564911	0.970557	-1.02705
CG11475	-0.755769	-0.378165	1.13393
CG11486	-0.239468	-0.858525	1.09799
CG11504	1.0664	-0.149678	-0.916724
CG11523	0.737909	0.400212	-1.13812
CG11537	-0.404227	-0.734609	1.13884
CG11539	-0.656874	1.15086	-0.493991
CG11555	-0.628345	-0.524808	1.15315
CG11560	0.307283	-1.11758	0.8103
CG11562	-0.836025	1.10779	-0.271767
CG11563	-0.632812	-0.520052	1.15286
CG11583	-0.666285	-0.483588	1.14987
CG11586	-1.1338	0.756314	0.377483
CG11590	0.579231	0.575467	-1.1547
CG11593	-0.235833	-0.861005	1.09684
CG11594	0.100869	0.945743	-1.04661
CG11596	0.327907	-1.12279	0.794878
CG11597	-0.850717	-0.250815	1.10153
CG11598	1.1547	-0.57735	-0.57735
CG11601	-0.779874	-0.347524	1.1274
CG1161	0.630454	0.522565	-1.15302
CG11619	0.0370402	0.980965	-1.01801
CG11638	-0.370974	-0.7615	1.13247
CG11655	0.0665507	0.965062	-1.03161
CG11656	0	0	0
CG11658	-0.459088	1.14711	-0.688023
CG11663	-0.57735	1.1547	-0.57735
CG11674	-0.57735	1.1547	-0.57735
CG11679	-0.853987	-0.246081	1.10007
CG11686	-0.853152	-0.247293	1.10044
CG11695	1.14214	-0.718161	-0.42398
CG11696	0.101813	0.945199	-1.04701
CG11699	1.0209	-0.0432043	-0.977698
CG11700	-1.14785	0.682709	0.465139
CG11710	0.190366	-1.0815	0.891133
CG1172	-0.723524	-0.417587	1.14111
CG11722	-0.120427	1.05476	-0.934333
CG11723	1.05477	-0.120455	-0.934317
CG11737	0.228419	0.86603	-1.09445
CG11752	-0.99475	-0.0104186	1.00517
CG11753	-1.08813	0.878698	0.209432
CG11755	0.347566	0.779841	-1.12741
CG11756	-0.57735	-0.57735	1.1547
CG11760	0.774116	0.354938	-1.12905
CG11768	0.966917	0.0631712	-1.03009
CG11771	0.874285	0.216095	-1.09038
CG11777	-0.633413	-0.51941	1.15282
CG11779	-1.14348	0.432697	0.710787
CG11781	-0.177933	1.07702	-0.899089
CG11786	-0.57735	1.1547	-0.57735
CG11788	-0.0831877	-0.955808	1.039
CG11790	-0.708742	-0.4351	1.14384
CG11791	-0.361833	-0.768719	1.13055
CG11807	0.236455	0.860581	-1.09704
CG11808	-1.09345	0.225364	0.868087
CG11811	-0.751717	-0.383214	1.13493
CG11815	-0.57735	1.1547	-0.57735
CG11825	-0.0704273	1.03335	-0.962925
CG11835	-0.57735	-0.57735	1.1547
CG11836	1.15299	-0.522124	-0.630868
CG11837	-0.618168	-0.535547	1.15371
CG11839	-0.78419	-0.341924	1.12611
CG11842	1.1547	-0.57735	-0.57735
CG11852	-1.14754	0.462584	0.684957
CG11854	-0.397127	1.13756	-0.740434
CG11857	-0.840419	-0.265554	1.10597
CG11858	-1.15214	0.509523	0.642618
CG11873	-0.508939	-0.643158	1.1521
CG11882	0.667998	0.481681	-1.14968
CG11883	-0.350247	-0.777764	1.12801
CG11885	-1.15435	0.601828	0.552521
CG11893	-0.302354	1.11629	-0.813932
CG11899	0.455903	0.690806	-1.14671
CG11902	0.653994	0.49715	-1.15114
CG11906	1.1027	-0.254619	-0.848076
CG11911	1.04943	-0.107554	-0.941876
CG11920	-0.767436	-0.363464	1.1309
CG11927	0.572797	0.581891	-1.15469
CG11929	1.1547	-0.57735	-0.57735
CG11961	0.534643	0.619029	-1.15367
CG11964	-0.500568	-0.650867	1.15144
CG11970	1.0947	-0.229194	-0.865507
CG11975	-0.991329	1.00845	-0.0171222
CG11980	-0.934001	-0.120988	1.05499
CG11983	0.200897	0.8843	-1.0852
CG11986	-0.606444	1.1542	-0.54776
CG11999	-0.755703	-0.378247	1.13395
CG12003	0.707912	0.436072	-1.14398
CG12004	-0.738755	-0.39918	1.13794
CG12007	-0.624082	-0.529322	1.1534
CG12010	-0.244337	1.09952	-0.855187
CG12012	0.426343	-1.14251	0.716169
CG12016	0.920729	0.14312	-1.06385
CG12024	-0.846346	-0.257102	1.10345
CG12025	-0.97744	-0.0436887	1.02113
CG12054	1.15099	-0.495391	-0.655599
CG12056	0.547098	0.607083	-1.15418
CG12065	0.496812	0.654303	-1.15111
CG12071	-0.360682	-0.769623	1.1303
CG12075	0.894589	0.184989	-1.07958
CG1208	-1.00856	0.0173483	0.991213
CG12081	0.909753	0.160966	-1.07072
CG12084	1.07636	-0.900244	-0.176113
CG12091	1.14525	-0.700326	-0.44492
CG12093	0.439518	0.704967	-1.14448
CG12096	0.00752415	-1.00374	0.996217
CG12099	0.668647	0.480958	-1.1496
CG12104	0.751627	0.383326	-1.13495
CG12105	0.843424	-1.1047	0.261279
CG12106	0.256518	0.846753	-1.10327
CG12107	-0.675549	-0.473228	1.14878
CG12112	-0.581363	-0.573328	1.15469
CG12116	1.00825	-0.0167126	-0.991539
CG12118	-1.03565	0.0755945	0.960057
CG12121	0.501355	0.650146	-1.1515
CG12123	-1.06702	0.915735	0.15129
CG12126	-0.57735	1.1547	-0.57735
CG12128	-0.86399	-0.231436	1.09543
CG12129	-0.765359	-0.366099	1.13146
CG1213	1.1547	-0.57735	-0.57735
CG12133	-0.580288	-0.574408	1.1547
CG12134	-0.625319	-0.528014	1.15333
CG12155	-1.15351	0.622196	0.531312
CG12159	0.213335	0.876118	-1.08945
CG12163	0.829786	0.280514	-1.1103
CG12170	0.30789	0.809851	-1.11774
CG12171	0.773288	0.356	-1.12929
CG12173	-0.67226	-0.47692	1.14918
CG12177	-0.0101135	1.00502	-0.994905
CG12179	-0.344149	1.12663	-0.782478
CG1218	-0.617389	1.15375	-0.536363
CG12182	1.11898	-0.312702	-0.806282
CG12184	0.666514	0.483333	-1.14985
CG12194	1.0838	-0.196888	-0.886912
CG12204	0.265528	0.840438	-1.10597
CG12206	1.14038	-0.413161	-0.727214
CG12209	-0.57735	-0.57735	1.1547
CG12213	0.450211	0.695754	-1.14597
CG12219	0.498265	0.652975	-1.15124
CG12224	-0.570682	-0.583993	1.15467
CG12236	0.940991	0.109076	-1.05007
CG12237	1.03449	-0.0729791	-0.961511
CG12241	0.903241	0.17137	-1.07461
CG12253	-1.01725	0.981812	0.0354342
CG12259	-0.626351	-0.526922	1.15327
CG12267	-0.562142	-0.592427	1.15457
CG1227	-0.501005	-0.650467	1.15147
CG12279	-1.14723	0.460051	0.687179
CG12288	-0.638255	-0.514223	1.15248
CG12290	-0.382212	-0.752523	1.13473
CG12299	0.602051	0.552292	-1.15434
CG12301	-0.237885	-0.859606	1.09749
CG12316	-0.874933	1.09005	-0.215119
CG12320	-1.10589	0.265288	0.840607
CG12321	-0.816327	1.11542	-0.29909
CG12325	-0.733321	-0.40579	1.13911
CG1233	0.234491	0.861918	-1.09641
CG12333	1.03809	-0.0811179	-0.95697
CG12338	-1.09764	0.238337	0.859298
CG1234	-0.622883	-0.530588	1.15347
CG12341	-0.0172453	-0.991266	1.00851
CG12343	-0.822326	-0.290859	1.11319
CG12344	1.08947	-0.213384	-0.876085
CG12355	-1.15176	0.504504	0.647252
CG1236	-0.326841	-0.795684	1.12252
CG12362	-0.250093	-0.851217	1.10131
CG12374	-0.0436124	-0.97748	1.02109
CG12375	-0.522122	1.15299	-0.63087
CG12376	-0.57735	1.1547	-0.57735
CG12379	-1.14738	0.461283	0.6861
CG12384	-1.05993	0.133204	0.926722
CG1239	-0.052359	-0.972792	1.02515
CG12391	-0.675434	-0.473358	1.14879
CG12446	-0.57735	-0.57735	1.1547
CG12448	-0.57735	1.1547	-0.57735
CG1246	-0.57735	-0.57735	1.1547
CG12470	-0.280579	1.11032	-0.82974
CG12493	0.567602	0.587044	-1.15465
CG12499	1.12996	-0.359096	-0.770866
CG12512	0.92151	0.141836	-1.06335
CG12519	-0.782178	1.12672	-0.344538
CG12531	1.1547	-0.57735	-0.57735
CG12535	0.449027	0.69678	-1.14581
CG12541	-0.57735	-0.57735	1.1547
CG12547	-1.04007	0.0856587	0.954415
CG12560	-0.759792	-0.373123	1.13291
CG12567	-1.12016	0.802833	0.317328
CG12576	0.589042	0.56558	-1.15462
CG12581	-0.57735	-0.57735	1.1547
CG12592	0.65352	0.49767	-1.15119
CG12594	0	0	0
CG12605	-0.977653	1.02094	-0.0432875
CG12608	-0.588563	-0.566064	1.15463
CG12617	-1.01108	0.0225439	0.988537
CG12643	0.583832	0.570844	-1.15468
CG1265	-0.0501191	1.02412	-0.973998
CG12655	-0.57735	-0.57735	1.1547
CG12659	0.545895	0.608245	-1.15414
CG12674	0.38519	0.750125	-1.13532
CG12689	0	0	0
CG12692	-0.57735	1.1547	-0.57735
CG12693	0	0	0
CG12698	0.758931	0.374204	-1.13314
CG12699	0.341101	0.784823	-1.12592
CG12702	0.544859	0.609243	-1.1541
CG1271	0.306085	0.811185	-1.11727
CG12713	-0.656957	1.15086	-0.493899
CG12717	0.292393	-1.11361	0.821212
CG12725	1.1547	-0.57735	-0.57735
CG12728	-0.742178	1.13717	-0.394991
CG12730	-0.370836	1.13245	-0.761609
CG12744	0.129053	0.929208	-1.05826
CG12746	-0.462721	-0.684836	1.14756
CG1275	0.714365	0.428478	-1.14284
CG12766	-0.57735	-0.57735	1.1547
CG12768	0.901916	0.17347	-1.07539
CG12773	1.1543	-0.60358	-0.550717
CG12795	-0.559173	-0.595338	1.15451
CG12811	1.14263	-0.715541	-0.427087
CG12814	-0.57735	1.1547	-0.57735
CG12818	-0.194548	-0.88843	1.08298
CG12822	-0.526369	-0.626873	1.15324
CG12824	-0.0679894	1.03226	-0.96427
CG12825	0.87716	0.21176	-1.08892
CG12826	-1.12289	0.328334	0.794555
CG12836	1.08216	-0.192218	-0.889938
CG12848	-0.216952	1.09067	-0.873715
CG12851	-0.57735	1.1547	-0.57735
CG12853	0.688805	0.458194	-1.147
CG12857	-1.14611	0.451287	0.694821
CG12860	-0.57735	1.1547	-0.57735
CG12861	0.126635	0.930651	-1.05729
CG12863	-0.765089	1.13153	-0.366441
CG12868	-0.041626	1.02016	-0.978537
CG12869	0.0991598	0.946726	-1.04589
CG12877	-1.08223	0.192424	0.889805
CG1288	-0.57735	1.1547	-0.57735
CG12880	-0.57735	-0.57735	1.1547
CG12883	-0.834717	-0.273609	1.10833
CG12895	-1.07702	0.177932	0.89909
CG12896	-0.44551	1.14533	-0.699818
CG12909	-0.637557	-0.514973	1.15253
CG12910	-0.57735	-0.57735	1.1547
CG12913	1.1547	-0.57735	-0.57735
CG12917	-0.57735	1.1547	-0.57735
CG12920	-0.226031	1.09367	-0.867639
CG12923	-0.57735	-0.57735	1.1547
CG12926	0.692387	0.454088	-1.14647
CG12929	-0.825589	1.11194	-0.28635
CG12934	0.419117	0.722244	-1.14136
CG12935	-1.14658	0.691658	0.454925
CG12942	-0.787252	1.12518	-0.337932
CG12945	-0.719838	-0.421985	1.14182
CG12947	0.924088	0.137577	-1.06167
CG12948	0.969948	0.057613	-1.02756
CG12963	-0.707212	-0.436893	1.1441
CG12971	0	0	0
CG12974	-0.62989	-0.523165	1.15306
CG12975	-0.817838	-0.297024	1.11486
CG12984	0.334201	0.790099	-1.1243
CG12990	-0.57735	-0.57735	1.1547
CG12991	0	0	0
CG12992	-1.11598	0.814779	0.301201
CG13000	-0.57735	-0.57735	1.1547
CG13001	-1.1121	0.286921	0.825176
CG13003	-0.57735	-0.57735	1.1547
CG13004	0.715495	-1.14264	0.427141
CG13005	-1.12978	0.358246	0.771532
CG13010	1.10224	-0.253114	-0.849123
CG13012	0.478721	0.67065	-1.14937
CG13014	-1.13531	0.750161	0.385146
CG13016	-0.199797	1.08482	-0.885018
CG13018	-0.372477	1.13278	-0.760306
CG13021	1.1547	-0.57735	-0.57735
CG13024	-0.57735	-0.57735	1.1547
CG13025	0.285882	0.825927	-1.11181
CG13032	-0.57735	-0.57735	1.1547
CG1307	-0.0712448	-0.962472	1.03372
CG13074	0.821886	0.291466	-1.11335
CG13077	-0.770054	-0.360132	1.13019
CG13078	-0.57735	-0.57735	1.1547
CG13085	0.733684	0.40535	-1.13903
CG13086	0.917665	0.148143	-1.06581
CG13088	0.057978	0.96975	-1.02773
CG1309	-0.999053	-0.00189107	1.00094
CG13096	-0.62719	-0.526033	1.15322
CG13097	-0.521672	-0.631293	1.15296
CG13101	-0.57735	-0.57735	1.1547
CG13102	-1.10126	0.249919	0.851338
CG13108	0.729065	0.410934	-1.14
CG13116	-0.611787	-0.542215	1.154
CG13117	-0.235249	-0.861402	1.09665
CG13123	-0.197318	1.08395	-0.886632
CG13124	-0.244225	-0.855264	1.09949
CG13126	-1.01398	0.985412	0.0285638
CG13127	-0.57735	-0.57735	1.1547
CG13138	-0.57735	-0.57735	1.1547
CG13144	0.674652	0.474236	-1.14889
CG13148	0.417945	0.723225	-1.14117
CG13151	0.104458	0.943671	-1.04813
CG13154	0.953424	0.0874122	-1.04084
CG13155	-0.57735	1.1547	-0.57735
CG13159	-0.57735	-0.57735	1.1547
CG1316	1.15401	-0.542547	-0.611468
CG13160	-0.595942	-0.558556	1.1545
CG13168	-0.57735	1.1547	-0.57735
CG1317	0.781887	0.344916	-1.1268
CG13175	1.10525	-0.263115	-0.842136
CG13185	-1.02489	0.973091	0.0518036
CG13192	-0.727292	-0.413067	1.14036
CG13197	-0.796416	-0.325871	1.12229
CG13204	0.694601	0.451541	-1.14614
CG13220	-0.688066	-0.459038	1.1471
CG13229	-0.57735	1.1547	-0.57735
CG13231	0	0	0
CG1324	0.151891	0.915365	-1.06726
CG13244	-0.57735	-0.57735	1.1547
CG13247	-0.57735	1.1547	-0.57735
CG13248	0.145362	0.919363	-1.06473
CG13252	0.49532	-1.15098	0.655664
CG13255	0.990983	0.0177967	-1.00878
CG13258	1.1547	-0.57735	-0.57735
CG13282	-0.57735	1.1547	-0.57735
CG13293	-0.57735	1.1547	-0.57735
CG13295	1.10336	-0.846544	-0.256819
CG13300	-0.0552236	1.02647	-0.971244
CG13314	-0.57735	1.1547	-0.57735
CG13315	0.303424	0.813146	-1.11657
CG13319	-0.703908	-0.440753	1.14466
CG13321	-0.617749	-0.535986	1.15374
CG13337	-0.57735	1.1547	-0.57735
CG13339	-0.374936	-0.758348	1.13328
CG13344	1.05023	-0.109475	-0.940758
CG13358	0.37789	0.755989	-1.13388
CG13359	-0.57735	1.1547	-0.57735
CG13360	1.14519	-0.444488	-0.700698
CG13362	1.09831	-0.857831	-0.240483
CG13364	-0.784067	-0.342084	1.12615
CG13365	-0.748545	-0.387148	1.13569
CG13366	-1.09488	0.229741	0.865137
CG13367	-0.0536561	-0.972092	1.02575
CG13369	1.06601	-0.91734	-0.148673
CG13373	-0.835341	1.10807	-0.27273
CG13375	-0.920022	-0.144282	1.0643
CG13377	0.623359	0.530085	-1.15344
CG13384	0.420881	0.720766	-1.14165
CG13390	-1.15371	0.618245	0.535466
CG13392	-1.07431	0.903755	0.170553
CG13397	-0.375311	1.13336	-0.758048
CG13398	-0.484181	-0.665751	1.14993
CG13405	0.302707	0.813673	-1.11638
CG13409	-0.411199	-0.728845	1.14004
CG13430	0.982233	0.0346343	-1.01687
CG13436	-0.57735	1.1547	-0.57735
CG13437	1.05364	-0.935938	-0.117706
CG1344	0.887886	0.195388	-1.08327
CG13442	-0.57735	1.1547	-0.57735
CG13449	1.07304	-0.167147	-0.905895
CG13457	0.389069	0.74699	-1.13606
CG13458	0	0	0
CG13482	-0.6108	-0.543242	1.15404
CG13484	-0.229766	1.09489	-0.86512
CG13488	-1.14644	0.453799	0.692639
CG13506	-0.57735	-0.57735	1.1547
CG13510	0.642658	0.509479	-1.15214
CG13511	0.620839	0.532741	-1.15358
CG13516	-0.0449192	-0.976783	1.0217
CG13531	0.888026	0.195172	-1.0832
CG1354	-0.92744	-0.132007	1.05945
CG13540	-0.57735	1.1547	-0.57735
CG13544	0.772843	0.35657	-1.12941
CG13551	-0.510458	-0.641752	1.15221
CG13559	-0.721621	-0.41986	1.14148
CG13562	0.872406	0.218915	-1.09132
CG13563	1.14063	-0.414703	-0.725931
CG13578	0.00583972	0.997067	-1.00291
CG1358	0.729275	0.41068	-1.13996
CG13585	0.281591	0.829014	-1.1106
CG13599	-0.455611	1.14667	-0.69106
CG1360	0.173755	-1.07549	0.901736
CG13601	0.497989	0.653228	-1.15122
CG13603	0.896973	0.181259	-1.07823
CG13604	-1.12795	0.777992	0.349954
CG13605	1.00774	-0.0156538	-0.992081
CG13607	-0.57735	1.1547	-0.57735
CG13609	-0.922541	1.06268	-0.140135
CG13623	0.546723	0.607446	-1.15417
CG13625	-0.478765	-0.670611	1.14938
CG13630	-0.389156	-0.74692	1.13608
CG13631	1.149	-0.673725	-0.475277
CG13654	-0.386941	1.13565	-0.748712
CG13659	0.252583	0.849491	-1.10207
CG13663	0.772655	-1.12946	0.35681
CG13667	0.71277	0.430361	-1.14313
CG13671	0.684002	0.46367	-1.14767
CG13676	-0.0302109	1.01476	-0.984552
CG13689	-1.13268	0.760717	0.37196
CG13690	-0.623503	-0.529933	1.15344
CG13692	-0.487796	-0.662491	1.15029
CG13693	-0.57735	-0.57735	1.1547
CG13694	-0.345428	1.12692	-0.781493
CG13698	0	0	0
CG13707	0	0	0
CG1371	0.513053	0.639343	-1.1524
CG13739	0	0	0
CG13741	1.11286	-0.28966	-0.823195
CG13742	-0.172866	1.07516	-0.902297
CG13743	-0.144406	1.06435	-0.919946
CG13747	-0.57735	1.1547	-0.57735
CG13749	0	0	0
CG13751	0.687023	0.460229	-1.14725
CG13760	1.04106	-0.953137	-0.0879198
CG13766	-0.013066	1.00647	-0.993403
CG13773	-0.568497	-0.586159	1.15466
CG13775	0.712584	0.430581	-1.14316
CG13784	-0.644891	1.15196	-0.507065
CG13807	-0.0224551	1.01104	-0.988583
CG13813	0.768941	-1.13049	0.361551
CG13827	-0.936802	1.05304	-0.116237
CG13850	-0.746247	-0.389986	1.13623
CG13868	-0.58324	-0.57144	1.15468
CG13871	0	0	0
CG13875	0.875617	0.21409	-1.08971
CG13876	-0.366813	-0.764795	1.13161
CG13877	0.270588	0.836862	-1.10745
CG13887	-0.50433	-0.647411	1.15174
CG13891	-0.164377	-0.907627	1.072
CG13893	0.504885	0.646901	-1.15179
CG13895	1.14194	-0.719209	-0.422735
CG13896	-0.754296	-0.380004	1.1343
CG13898	-0.57735	1.1547	-0.57735
CG13901	-0.766805	-0.364265	1.13107
CG13907	0.231023	0.86427	-1.09529
CG13917	0.847784	0.255038	-1.10282
CG13919	0.215885	-1.09031	0.874425
CG13920	1.04201	-0.0901215	-0.951889
CG13921	-0.15415	1.06812	-0.913974
CG13926	-0.868213	1.09339	-0.225177
CG13928	-0.57735	-0.57735	1.1547
CG13933	0.397462	0.740161	-1.13762
CG13937	-0.479946	-0.669554	1.1495
CG1394	1.09911	-0.243016	-0.856095
CG13982	0.937429	0.115169	-1.0526
CG13992	-0.57735	1.1547	-0.57735
CG13994	0.158232	0.911451	-1.06968
CG14005	0.85281	0.247787	-1.1006
CG14015	0.643108	-1.1521	0.508994
CG14020	0.373551	0.759451	-1.133
CG14024	-0.57735	1.1547	-0.57735
CG14036	0.707311	0.436777	-1.14409
CG14042	0.560141	0.59439	-1.15453
CG14043	-1.15203	0.508106	0.643929
CG14044	1.07719	-0.178387	-0.898801
CG14050	0.461373	0.68602	-1.14739
CG14053	-0.57735	-0.57735	1.1547
CG14054	-0.57735	1.1547	-0.57735
CG14057	-1.11869	0.807129	0.311563
CG1407	-0.817681	-0.297239	1.11492
CG14072	0.566985	0.587654	-1.15464
CG14073	-0.76505	-0.36649	1.13154
CG14074	-0.523946	-0.629156	1.1531
CG14077	0.982461	0.0342005	-1.01666
CG14079	0.633748	0.519052	-1.1528
CG14100	-1.07172	0.908103	0.163616
CG14102	0.847643	0.255241	-1.10288
CG14104	0.311683	0.80704	-1.11872
CG14105	0.501018	-1.15147	0.650455
CG14109	-0.57735	-0.57735	1.1547
CG14113	-0.57735	1.1547	-0.57735
CG14117	0.825844	0.285997	-1.11184
CG14130	-0.439958	-0.70459	1.14455
CG14132	0	0	0
CG14135	-0.212926	-0.876389	1.08931
CG14142	0.469019	0.679283	-1.1483
CG14154	-0.94915	-0.0949298	1.04408
CG1416	-0.758307	-0.374987	1.13329
CG14174	-0.876271	-0.213103	1.08937
CG1418	-0.688099	-0.459001	1.1471
CG14182	-1.13231	0.37018	0.76213
CG14183	-1.05321	0.936563	0.116643
CG14184	-0.981416	-0.0361856	1.0176
CG14194	0.95178	0.0903136	-1.04209
CG14196	-0.57735	1.1547	-0.57735
CG14200	0.121304	0.933815	-1.05512
CG14207	1.13197	-0.368556	-0.763416
CG14210	-0.827072	-0.284292	1.11136
CG14212	-0.57735	1.1547	-0.57735
CG14220	-1.0086	0.0174365	0.991168
CG14221	0.835051	0.273139	-1.10819
CG14223	-0.293751	1.11398	-0.820225
CG14229	0.9818	0.0354578	-1.01726
CG14230	-0.559944	-0.594583	1.15453
CG14231	-0.539698	1.1539	-0.614201
CG14232	-0.187496	-0.892981	1.08048
CG14252	-0.0626301	-0.967213	1.02984
CG14253	-0.554537	-0.599867	1.1544
CG14257	-1.14334	0.431747	0.711594
CG14260	-0.216814	1.09062	-0.873807
CG14262	-0.716593	1.14243	-0.425841
CG14269	1.1547	-0.57735	-0.57735
CG14270	-0.713006	-0.430083	1.14309
CG14273	-0.57735	-0.57735	1.1547
CG14275	0	0	0
CG14285	1.13708	-0.394522	-0.74256
CG14286	-0.388926	-0.747106	1.13603
CG14292	-0.216929	-0.87373	1.09066
CG14294	-0.57735	1.1547	-0.57735
CG14297	0.261654	0.843161	-1.10482
CG14302	1.13249	-0.371057	-0.761434
CG14305	0.86194	0.234458	-1.0964
CG14312	1.14441	-0.439008	-0.705404
CG14314	0	0	0
CG14322	0.530335	0.623122	-1.15346
CG14325	0	0	0
CG14332	1.11039	-0.280845	-0.829549
CG1434	-0.649543	-0.502011	1.15155
CG14341	-0.601341	-0.553023	1.15436
CG14346	1.11526	-0.298486	-0.816769
CG14352	-0.817033	-0.298125	1.11516
CG14355	-0.57735	1.1547	-0.57735
CG14367	-0.57735	1.1547	-0.57735
CG1440	0.497948	0.653266	-1.15121
CG14401	0.561726	0.592835	-1.15456
CG14402	0	0	0
CG14406	0.00236845	0.998814	-1.00118
CG14407	-0.959429	-0.0767227	1.03615
CG14408	0.906156	-1.07289	0.16673
CG14411	0.60599	0.548229	-1.15422
CG14414	-0.169244	-0.904579	1.07382
CG14431	-0.885987	-0.198311	1.0843
CG14434	-0.760812	-0.37184	1.13265
CG14435	0.871454	0.220342	-1.0918
CG14440	0.645805	0.506074	-1.15188
CG14441	0.874617	0.215596	-1.09021
CG14442	1.02274	-0.0471548	-0.975588
CG14443	0	0	0
CG14450	1.10765	-0.836376	-0.271273
CG14451	-1.15087	0.494054	0.656816
CG14459	-0.57735	-0.57735	1.1547
CG14464	-0.655033	-0.496012	1.15104
CG14478	0.486168	-1.15013	0.663961
CG14480	-0.622221	-0.531285	1.15351
CG14483	-1.12707	0.346092	0.78098
CG14488	0.19942	0.885264	-1.08468
CG14490	0.272709	0.835356	-1.10807
CG14491	-0.57735	1.1547	-0.57735
CG14502	0.273699	0.834653	-1.10835
CG14511	1.0825	-0.193205	-0.8893
CG14512	-0.871229	-0.220678	1.09191
CG14516	-0.57735	1.1547	-0.57735
CG14535	-0.038112	1.01851	-0.980399
CG14540	-0.57735	-0.57735	1.1547
CG14543	-0.83755	-0.269616	1.10717
CG14544	-0.365895	-0.76552	1.13142
CG14545	-0.233275	1.09602	-0.862744
CG14556	-1.11522	0.298337	0.816878
CG14561	0.189914	0.891425	-1.08134
CG14562	0.405819	0.733297	-1.13912
CG14566	-0.57735	1.1547	-0.57735
CG14567	-1.01264	0.986865	0.0257727
CG14572	-0.65004	1.15151	-0.50147
CG14579	0.850517	0.251103	-1.10162
CG14589	-1.12958	0.357323	0.772254
CG14605	0	0	0
CG14609	0.458581	0.688466	-1.14705
CG1461	-0.156359	1.06897	-0.91261
CG14610	-0.63041	-0.522612	1.15302
CG14613	0.0336756	-1.01641	0.982737
CG14615	0.747621	0.38829	-1.13591
CG14618	-1.1525	0.51454	0.637959
CG14621	0.464773	0.683031	-1.1478
CG14628	0	0	0
CG14629	-0.045098	1.02179	-0.976688
CG1463	0.426368	0.716148	-1.14252
CG14630	0.63615	0.516482	-1.15263
CG14636	0.92509	-1.06101	0.135917
CG14641	-0.976145	-0.0461136	1.02226
CG14642	0.742106	0.39508	-1.13719
CG14645	-1.03572	0.959977	0.0757389
CG14646	-1.09202	0.870995	0.221028
CG14647	-0.0452878	1.02187	-0.976587
CG14650	0.70478	0.439736	-1.14452
CG14655	0.969387	0.0586452	-1.02803
CG14657	0.71469	0.428094	-1.14278
CG14658	-0.053784	1.02581	-0.972023
CG14662	-0.57735	1.1547	-0.57735
CG14664	-0.720998	-0.420604	1.1416
CG14667	-0.975652	-0.0470367	1.02269
CG14669	-0.57735	-0.57735	1.1547
CG14671	-1.09578	0.232545	0.863239
CG14683	-0.370186	-0.762125	1.13231
CG14688	-0.373926	1.13308	-0.759152
CG14692	0.630118	-1.15304	0.522922
CG14693	-0.57735	1.1547	-0.57735
CG14694	1.15219	-0.642052	-0.510134
CG14695	0.623407	0.530035	-1.15344
CG14696	0.83953	0.266815	-1.10634
CG14701	-0.790284	-0.333959	1.12424
CG14708	0.338862	0.78654	-1.1254
CG14710	-1.00135	0.00270497	0.998645
CG14711	1.0976	-0.859372	-0.238228
CG14712	1.15184	-0.505571	-0.646269
CG14715	0.824919	0.287277	-1.1122
CG14718	-0.57735	1.1547	-0.57735
CG14721	0.447637	0.697982	-1.14562
CG14722	-0.626326	-0.526948	1.15327
CG14740	-0.712455	-0.430733	1.14319
CG14757	0.258263	0.845535	-1.1038
CG14760	0.685458	0.462014	-1.14747
CG14762	0	0	0
CG14763	-1.13064	0.768412	0.362224
CG14764	0.777281	0.35087	-1.12815
CG14767	0.720416	0.421297	-1.14171
CG14777	-0.989795	-0.0201071	1.0099
CG14778	-0.57735	-0.57735	1.1547
CG14780	-1.06546	0.918211	0.147249
CG14785	1.05334	-0.116971	-0.93637
CG14787	-0.248507	1.10082	-0.852313
CG14797	1.13021	-0.360258	-0.769956
CG14803	0.61955	0.534096	-1.15365
CG14805	-0.870137	-0.222309	1.09245
CG14806	0.0449121	-1.0217	0.976787
CG14812	-0.96578	-0.0652439	1.03102
CG14814	0.706729	0.437459	-1.14419
CG14817	-1.15447	0.557112	0.597355
CG14818	0.313538	0.80566	-1.1192
CG14829	-0.57735	-0.57735	1.1547
CG14830	-0.57735	-0.57735	1.1547
CG14834	0.998086	0.00381712	-1.0019
CG14855	-0.537943	-0.615881	1.15382
CG14856	1.12926	-0.773368	-0.355897
CG1486	-0.794877	1.12279	-0.327908
CG14860	0.942544	0.106402	-1.04895
CG14864	0.448119	0.697565	-1.14568
CG14866	1.09041	-0.216178	-0.87423
CG14868	0.791329	0.332586	-1.12391
CG14879	-0.59193	-0.562647	1.15458
CG14881	1.04349	-0.0935533	-0.949936
CG14882	-0.905878	1.07305	-0.167172
CG14883	1.15084	-0.49368	-0.657157
CG14894	-0.781089	-0.345951	1.12704
CG14903	-0.989341	-0.0209871	1.01033
CG14906	-0.514251	-0.638229	1.15248
CG14907	-0.687556	-0.459621	1.14718
CG1492	0.453408	0.692978	-1.14639
CG14921	0.288924	0.823728	-1.11265
CG14926	0.950737	0.0921466	-1.04288
CG14931	1.1547	-0.57735	-0.57735
CG14932	-0.57735	1.1547	-0.57735
CG14937	1.07004	-0.910864	-0.159178
CG1494	0.386601	0.748987	-1.13559
CG14957	0.298244	0.816946	-1.11519
CG14961	-0.703774	-0.440909	1.14468
CG14963	0.765724	0.365637	-1.13136
CG14964	0.704087	0.440544	-1.14463
CG14965	0.979034	0.0406894	-1.01972
CG14966	1.00905	-0.0183487	-0.990699
CG14968	-1.1303	0.360682	0.769623
CG14969	0.631835	0.521094	-1.15293
CG14971	0.108012	0.94161	-1.04962
CG14974	0.40692	0.732388	-1.13931
CG14977	-1.1217	0.798204	0.3235
CG14984	-0.57735	-0.57735	1.1547
CG14985	-0.866874	1.09404	-0.227166
CG14989	-0.57735	-0.57735	1.1547
CG14990	0.310363	-1.11838	0.80802
CG14995	-0.700571	-0.444636	1.14521
CG14997	-1.11621	0.302047	0.814158
CG15011	-1.15379	0.616631	0.537157
CG15012	-0.760716	-0.371961	1.13268
CG15014	-0.711894	-0.431393	1.14329
CG15019	-0.715734	-0.426858	1.14259
CG15027	-0.791882	-0.331858	1.12374
CG1503	1.14929	-0.477976	-0.671316
CG15034	-0.57735	1.1547	-0.57735
CG15035	0.395766	0.741546	-1.13731
CG15040	0	0	0
CG15043	-0.57735	1.1547	-0.57735
CG15073	0.914884	0.152673	-1.06756
CG15080	0.152783	0.914817	-1.0676
CG15083	0.242396	0.85652	-1.09892
CG15084	-1.04731	0.10253	0.944785
CG15093	1.03678	-0.0781406	-0.958637
CG15097	0.714301	-1.14285	0.428553
CG15098	0.00510197	0.997439	-1.00254
CG15099	0.825469	0.286516	-1.11198
CG15107	-0.396668	1.13748	-0.740809
CG15109	0.432527	0.710931	-1.14346
CG15111	0.841755	0.263656	-1.10541
CG15117	0.787586	0.337494	-1.12508
CG15118	0.729333	0.410611	-1.13994
CG15120	1.1547	-0.57735	-0.57735
CG15127	0	0	0
CG15128	-0.57735	1.1547	-0.57735
CG1513	-0.224079	-0.868951	1.09303
CG15136	-0.57735	1.1547	-0.57735
CG15141	0.915952	0.150936	-1.06689
CG15142	-0.278633	1.10977	-0.831133
CG15143	-0.57735	-0.57735	1.1547
CG15144	-1.15284	0.519732	0.633112
CG15145	-1.071	0.161722	0.909283
CG15147	-0.57735	1.1547	-0.57735
CG15160	0.669642	0.479847	-1.14949
CG15168	-0.726841	1.14045	-0.41361
CG15170	-0.361853	1.13056	-0.768704
CG15172	-0.915389	1.06724	-0.151852
CG15177	1.09085	-0.217505	-0.873347
CG15186	-0.57735	-0.57735	1.1547
CG15196	-0.57735	-0.57735	1.1547
CG15199	-1.14845	0.470326	0.678125
CG15200	0.429248	0.713713	-1.14296
CG15201	-0.976729	1.02175	-0.0450203
CG15202	-0.315574	1.11972	-0.804143
CG15209	0.389991	0.746243	-1.13623
[truncated: 8,393 more rows]

## Sheet: PM3
gene	Unwouned_AverageExpression	Wounded_AverageExpression	Wasp inf. 24h_AverageExpression
128up	-0.931893	-0.124546	1.05644
14-3-3epsilon	-0.0342834	-0.982417	1.0167
14-3-3zeta	-0.476344	-0.672774	1.14912
140up	0.69914	0.446296	-1.14544
18SrRNA-Psi:CR41602	-0.754512	-0.379734	1.13425
18SrRNA-Psi:CR45861	0.540715	0.613227	-1.15394
18SrRNA:CR41548	0.737297	0.400959	-1.13826
18SrRNA:CR45838	0.715852	0.426719	-1.14257
18SrRNA:CR45841	0.726235	0.414338	-1.14057
18w	0	0	0
26-29-p	0.518298	0.634453	-1.15275
28SrRNA-Psi:CR40596	0.498115	0.653112	-1.15123
28SrRNA-Psi:CR40741	0.911845	0.157595	-1.06944
28SrRNA-Psi:CR41609	1.0631	-0.141201	-0.921894
28SrRNA-Psi:CR45848	0.629991	0.523058	-1.15305
28SrRNA-Psi:CR45851	0.760548	0.372172	-1.13272
28SrRNA-Psi:CR45853	1.09156	-0.219627	-0.871932
28SrRNA-Psi:CR45855	-0.682294	-0.46561	1.1479
28SrRNA-Psi:CR45859	-0.468134	-0.680065	1.1482
28SrRNA-Psi:CR45860	1.04404	-0.0948376	-0.949203
28SrRNA-Psi:CR45862	0.183232	0.895714	-1.07895
28SrRNA:CR45837	0.440764	0.703899	-1.14466
28SrRNA:CR45844	0.709013	0.434782	-1.14379
312	-0.944798	1.04731	-0.102508
4E-T	0.342536	0.78372	-1.12626
5-HT1A	0	0	0
5.8SrRNA-Psi:CR45849	-0.155792	1.06875	-0.91296
5.8SrRNA-Psi:CR45854	-0.57735	-0.57735	1.1547
5.8SrRNA-Psi:CR45857	0.541653	-1.15398	0.612327
5.8SrRNA-Psi:CR45863	-0.554677	-0.59973	1.15441
5.8SrRNA:CR40454	0	0	0
5.8SrRNA:CR45839	0	0	0
5.8SrRNA:CR45842	0	0	0
5.8SrRNA:CR45852	0	0	0
5PtaseI	-1.12629	0.342683	0.783607
7B2	0	0	0
7SLRNA:CR32864	0.0182271	0.990762	-1.00899
7SLRNA:CR42652	0.088529	0.952792	-1.04132
a	0.937562	-1.0525	0.114943
A16	0.900442	-1.07624	0.175801
a6	0.046669	0.975848	-1.02252
AANAT1	0.433225	0.710338	-1.14356
AANATL2	0	0	0
Aasdh	0.0896949	0.952131	-1.04183
Aatf	-0.752162	-0.382661	1.13482
aay	-0.326736	1.1225	-0.795764
ab	-0.894035	1.07989	-0.185854
ABCA	0.306672	0.810752	-1.11742
ABCB7	-0.240506	1.09832	-0.857815
ABCD	-0.485611	1.15007	-0.664463
abd-A	-0.57735	1.1547	-0.57735
Abd-B	-0.57735	-0.57735	1.1547
Abi	0.222898	0.869743	-1.09264
Abl	0.774166	0.354875	-1.12904
abo	0.808182	0.310144	-1.11833
Abp1	0.0701292	0.963089	-1.03322
abs	0.391868	0.74472	-1.13659
Ac13E	-1.00426	0.995686	0.00857322
Ac3	0	0	0
Ac76E	-0.654705	-0.496371	1.15108
Ac78C	-0.827635	-0.283509	1.11114
Acbp1	-1.12502	0.337251	0.787772
Acbp2	1.10776	-0.271651	-0.836108
Acbp3	-0.820676	1.11381	-0.293131
Acbp4	1.1547	-0.57735	-0.57735
Acbp5	1.10376	-0.258133	-0.845626
Acbp6	1.07261	-0.165998	-0.906614
ACC	-0.128149	1.0579	-0.929748
AcCoAS	-0.555637	-0.598795	1.15443
Ace	0.949056	0.095095	-1.04415
Acer	0.580186	0.57451	-1.1547
Acf	0.151144	0.915824	-1.06697
achi	-0.657313	1.15082	-0.493508
acj6	-0.57735	1.1547	-0.57735
Ack	0.571895	0.582788	-1.15468
Ack-like	-0.727366	-0.41298	1.14035
Acn	-0.663209	-0.487001	1.15021
Acox57D-d	-0.389687	1.13618	-0.74649
Acox57D-p	0.74079	0.396692	-1.13748
Acp95EF	0.407064	0.732269	-1.13933
Acph-1	0.361239	0.769186	-1.13042
Acsl	0.533555	0.620065	-1.15362
Act42A	-0.870415	-0.221895	1.09231
Act57B	-0.0516571	1.02483	-0.97317
Act5C	0.926205	0.134064	-1.06027
Act79B	-0.57735	-0.57735	1.1547
Act87E	1.12027	-0.317758	-0.802512
Act88F	-0.57735	-0.57735	1.1547
Actbeta	1.07822	-0.181235	-0.896988
Actn	0.606188	0.548024	-1.15421
ACXD	1.1547	-0.57735	-0.57735
Acyp2	-0.824593	1.11232	-0.287728
Ada	0.187699	-1.08055	0.892851
Ada1-1	1.15308	-0.629554	-0.523523
Ada1-2	-0.192037	1.08209	-0.890055
Ada2a	-0.518356	-0.634399	1.15276
Ada2b	0.79321	0.330109	-1.12332
Ada3	0.437048	0.707079	-1.14413
AdamTS-A	-0.591092	-0.563498	1.15459
AdamTS-B	0	0	0
Adar	-0.173069	1.07524	-0.902169
Adat1	-0.57735	1.1547	-0.57735
Adck1	-0.0336661	1.01641	-0.982742
Adck5	-0.214873	1.08997	-0.875097
ADD1	0.888661	0.194193	-1.08285
AdenoK	1.05261	-0.937416	-0.115191
Adf1	-1.15334	0.528184	0.625158
Adgf-A	-1.15224	0.510816	0.64142
Adgf-A2	0	0	0
Adh	-0.57735	1.1547	-0.57735
Adhr	-0.57735	1.1547	-0.57735
Adi1	-0.752523	-0.382212	1.13473
AdipoR	-0.634852	-0.517872	1.15272
Adk1	-0.727159	-0.413228	1.14039
Adk2	-0.600611	-0.553773	1.15438
Adk3	0.775561	0.353084	-1.12864
AdoR	0	0	0
adp	0.247767	0.852825	-1.10059
AdSL	0.50898	0.64312	-1.1521
AdSS	-0.444051	1.14513	-0.701075
Aduk	-0.64944	1.15156	-0.502124
Ady43A	0.913642	0.154688	-1.06833
Aef1	-1.13658	0.391815	0.744762
aft	0.371717	0.76091	-1.13263
Afti	-0.556788	1.15446	-0.597672
Ag5r	-0.57735	-0.57735	1.1547
Ag5r2	0	0	0
AGBE	0.291131	0.822129	-1.11326
AgmNAT	-0.474608	-0.674322	1.14893
ago	-0.0822916	-0.956312	1.0386
AGO1	1.0378	-0.0804512	-0.957344
AGO2	-1.05298	0.116084	0.936892
AGO3	0.934177	0.120691	-1.05487
Agpat1	0.413354	0.727054	-1.14041
Agpat2	0	0	0
Agpat3	0.885129	-1.08476	0.199628
Agpat4	-0.57735	1.1547	-0.57735
agt	0.728545	0.41156	-1.14011
Ahcy	0.643739	0.508311	-1.15205
AhcyL1	0.289835	0.823068	-1.1129
AIF	-0.589149	1.15462	-0.56547
AIMP1	-0.884034	-0.201304	1.08534
AIMP2	-0.904292	-0.1697	1.07399
AIMP3	-0.797297	-0.324704	1.122
Ak6	-0.950069	-0.0933197	1.04339
Akap200	-0.925201	-0.135733	1.06093
Akh	-0.720153	1.14176	-0.421611
akirin	-0.364597	-0.766544	1.13114
Akt1	0.798951	0.322506	-1.12146
Aladin	0.119172	0.935074	-1.05425
AlaRS	0.659184	0.491448	-1.15063
AlaRS-m	0.533317	0.620291	-1.15361
Alas	-0.661735	1.15037	-0.488633
alc	0.594336	0.560197	-1.15453
Ald1	0.551725	0.602602	-1.15433
Aldh	0.757163	0.37642	-1.13358
Aldh-III	0.428085	0.714698	-1.14278
Aldh7A1	0.0727149	-1.03437	0.961658
Alg-2	-1.12698	0.345686	0.781293
Alg1	1.03539	-0.074994	-0.960392
Alg10	-1.14464	0.440637	0.704008
Alg11	-0.993731	-0.0124226	1.00615
Alg14	-0.0904048	-0.951728	1.04213
Alg2	-0.723255	-0.417908	1.14116
Alg3	0.901425	0.174248	-1.07567
Alg9	-1.12642	0.783168	0.343253
Alh	-0.696027	-0.449896	1.14592
alien	0.944249	0.103457	-1.04771
ALiX	0.701136	0.44398	-1.14512
Alk	0.949046	0.0951123	-1.04416
AlkB	-1.08383	0.196978	0.886854
Alp12	0.393321	0.743538	-1.13686
alph	-0.741466	-0.395864	1.13733
alpha-Cat	-0.312884	-0.806147	1.11903
alpha-Est1	1.01069	-0.0217341	-0.988956
alpha-Est10	-0.990998	-0.0177663	1.00876
alpha-Est3	1.13872	-0.735142	-0.40358
alpha-Est4	0.923166	0.139102	-1.06227
alpha-Est5	0	0	0
alpha-Est7	0.776439	0.351954	-1.12839
alpha-Est8	0.062095	0.967506	-1.0296
alpha-Est9	-1.15233	0.640254	0.512073
alpha-Man-Ia	0.426164	0.71632	-1.14248
alpha-Man-Ib	-0.254317	1.1026	-0.848286
alpha-Man-Ic	-0.57735	-0.57735	1.1547
alpha-Man-IIa	0.298306	0.816901	-1.11521
alpha-Man-IIb	-0.646093	-0.505762	1.15185
alpha-PheRS	-0.0435765	1.02108	-0.977499
alpha-Spec	0.65895	0.491706	-1.15066
alpha4GT1	1.11933	-0.31406	-0.805272
alphaCOP	0.651634	0.499732	-1.15137
alphaSnap	-1.14852	0.677586	0.470934
alphaTub67C	-0.441055	1.1447	-0.703649
alphaTub84B	-0.731765	-0.407675	1.13944
alphaTub84D	0.573729	0.580964	-1.15469
alphaTub85E	-0.297615	1.11502	-0.817406
Alr	0.675297	0.473512	-1.14881
Als2	0.428831	0.714066	-1.1429
alt	-0.487888	-0.662408	1.1503
Ama	0.305022	0.811969	-1.11699
Amacr	-0.0941826	1.04376	-0.949577
amn	0.343984	0.782605	-1.12659
amon	-0.975333	1.02296	-0.0476321
AMPdeam	-0.749334	-0.386171	1.1355
Amph	-0.538887	1.15386	-0.614978
AMPKalpha	0.7849	0.341	-1.1259
Amun	1.04982	-0.108487	-0.941333
amx	0.632298	0.5206	-1.1529
ana	-0.57735	-0.57735	1.1547
ana1	-0.10736	1.04935	-0.941988
ana2	0.0370734	0.980948	-1.01802
ana3	0.867958	0.225555	-1.09351
Ance	-0.822628	-0.290442	1.11307
Ance-2	-0.586271	-0.568383	1.15465
Ance-3	0.175519	0.90062	-1.07614
Ance-4	-0.57735	-0.57735	1.1547
Ance-5	0.675012	0.473831	-1.14884
anchor	-0.768843	1.13052	-0.361675
angel	0.182592	-1.07871	0.896123
Ank	0.353652	0.775118	-1.12877
Ank2	-0.772627	1.12947	-0.356846
Ankle2	0.468926	0.679365	-1.14829
anne	-0.458667	1.14706	-0.688391
anox	0.668584	-1.14961	0.481028
Ant2	-0.799288	1.12135	-0.322058
antdh	0	0	0
Antp	-0.57735	-0.57735	1.1547
antr	-1.05759	0.930196	0.127397
AnxB10	0.473094	0.675668	-1.14876
AnxB11	-1.00548	0.994432	0.0110454
AnxB9	-0.748755	-0.386888	1.13564
aop	-1.09537	0.231252	0.864115
aos	0	0	0
Aos1	-0.908327	-0.163255	1.07158
AOX1	0.67586	0.472878	-1.14874
AOX3	0.65935	0.491265	-1.15062
ap	0	0	0
AP-1-2beta	0.621068	0.5325	-1.15357
AP-1gamma	0.137941	0.923869	-1.06181
AP-1mu	0.839249	0.267213	-1.10646
AP-1sigma	-1.15328	0.527066	0.626215
AP-2alpha	0.278186	0.831453	-1.10964
AP-2mu	0.720451	0.421256	-1.14171
AP-2sigma	0.477725	0.671541	-1.14927
Apc	0.527525	0.625782	-1.15331
APC10	0.938138	0.11396	-1.0521
Apc2	0.284206	0.827134	-1.11134
APC4	0.616615	0.537174	-1.15379
ApepP	-0.670851	1.14935	-0.478496
Apf	-0.693925	-0.452319	1.14624
aph-1	-0.479342	-0.670094	1.14944
aPKC	-1.15442	0.555259	0.599163
Apl	1.10799	-0.272447	-0.835543
Aplip1	-0.57735	-0.57735	1.1547
apolpp	0.171959	0.902869	-1.07483
Apoltp	0.835647	0.272299	-1.10795
app	-0.985949	-0.0275332	1.01348
APP-BP1	0.902238	0.17296	-1.0752
Appl	1.14446	-0.439351	-0.70511
Aprt	-0.576167	-0.578533	1.1547
Aps	-0.510241	-0.641953	1.15219
apt	-0.837387	1.10723	-0.269846
aqz	-0.553952	-0.600437	1.15439
ara	0	0	0
aralar1	0.291478	0.821877	-1.11335
Arc1	-1.03476	0.07358	0.961178
Arc2	-0.607791	-0.546365	1.15416
Arc42	1.14272	-0.715058	-0.427658
Archease	-1.12484	0.33649	0.788353
Arf102F	-0.907987	-0.1638	1.07179
Arf51F	0.794625	-1.12287	0.328241
Arf79F	-0.682194	-0.465723	1.14792
ArfGAP1	0.870651	0.221542	-1.09219
ArfGAP3	0.585646	0.569015	-1.15466
Arfip	-0.856395	-0.242579	1.09897
Arfrp1	0.801556	-1.12059	0.319035
arg	0.877212	0.211682	-1.08889
Argk	0.582484	0.572201	-1.15469
Argl	-0.453094	1.14635	-0.693251
ArgRS	0.545632	0.608498	-1.15413
ArgRS-m	1.01112	-0.0226272	-0.988494
ari-1	-1.08555	0.201926	0.883628
ari-2	0.971895	0.0540209	-1.02592
Arl1	0.495631	-1.15101	0.655381
Arl2	-1.06256	0.139839	0.92272
Arl4	-0.807286	-0.311352	1.11864
Arl5	-0.190477	-0.891062	1.08154
Arl6	-1.06577	0.917724	0.148046
Arl6IP1	1.11897	-0.806313	-0.31266
Arl8	0.636156	0.516475	-1.15263
arm	0.6993	0.446111	-1.14541
armi	-0.0155685	1.00769	-0.992125
Arp1	0.558323	0.596171	-1.15449
Arp10	0.806402	0.312541	-1.11894
Arp2	-0.153318	1.06781	-0.914487
Arp3	-0.988247	-0.0231051	1.01135
Arp5	0.748936	0.386664	-1.1356
Arp53D	-0.57735	1.1547	-0.57735
Arp6	1.15448	-0.557511	-0.596965
Arp8	1.13924	-0.406528	-0.732712
Arpc1	0.40351	-1.13871	0.7352
Arpc2	-0.560442	-0.594095	1.15454
Arpc3A	-0.65679	-0.494083	1.15087
Arpc3B	-0.85922	-0.238451	1.09767
Arpc4	-0.742156	-0.395019	1.13717
Arpc5	-0.534732	-0.618945	1.15368
arr	-0.0966548	1.04482	-0.948163
Ars2	-0.468173	-0.680031	1.1482
Art1	0.769616	0.360691	-1.13031
Art3	-0.189579	1.08122	-0.891641
Art4	0.461061	0.686294	-1.14735
Art7	0.809167	0.308815	-1.11798
Art8	-0.955098	-0.0844483	1.03955
Arts	0.615739	0.538091	-1.15383
aru	0.0962912	0.948371	-1.04466
Arv1	1.05729	-0.126656	-0.930638
arx	-1.12511	0.337631	0.787482
Asap	0.498191	0.653043	-1.15123
Asator	-0.0615472	1.02935	-0.967805
Asciz	1.03143	-0.0661343	-0.965291
asf1	1.13043	-0.361286	-0.769149
ash1	0.280158	0.830042	-1.1102
ash2	0.444464	0.700719	-1.14518
Ask1	0.540343	0.613583	-1.15393
asl	1.14383	-0.435007	-0.708821
AsnRS	0.692413	0.454058	-1.14647
AsnRS-m	0.335876	-1.1247	0.788822
AsnS	0.33347	0.790656	-1.12413
asp	0.806819	0.31198	-1.1188
Asph	-0.920224	1.06417	-0.14395
ASPP	0	0	0
AspRS	0.491167	0.659439	-1.15061
AspRS-m	0.786408	0.339033	-1.12544
asrij	-0.360611	-0.769679	1.13029
asRNA:ASTR	-0.735598	1.13862	-0.403026
asRNA:CR17025	-0.710657	1.14351	-0.432849
asRNA:CR31144	-0.608672	-0.545451	1.15412
asRNA:CR31514	0.876022	0.21348	-1.0895
asRNA:CR31912	-0.57735	-0.57735	1.1547
asRNA:CR32252	-0.57735	-0.57735	1.1547
asRNA:CR33945	-0.0528891	1.0254	-0.972506
asRNA:CR42254	-0.708701	-0.435147	1.14385
asRNA:CR42547	-0.965061	-0.0665527	1.03161
asRNA:CR42738	-0.57735	-0.57735	1.1547
asRNA:CR42871	0.61568	0.538153	-1.15383
asRNA:CR43152	1.1547	-0.57735	-0.57735
asRNA:CR43159	-0.14176	-0.921556	1.06332
asRNA:CR43257	-0.66071	-0.489765	1.15047
asRNA:CR43425	-0.57735	1.1547	-0.57735
asRNA:CR43426	1.1547	-0.57735	-0.57735
asRNA:CR43460	0.948008	0.0969264	-1.04493
asRNA:CR43463	1.10437	-0.260171	-0.8442
asRNA:CR43465	0.514793	-1.15252	0.637724
asRNA:CR43466	-0.57735	-0.57735	1.1547
asRNA:CR43468	-1.10801	0.835503	0.272502
asRNA:CR43474	-0.57735	-0.57735	1.1547
asRNA:CR43476	0	0	0
asRNA:CR43480	0	0	0
asRNA:CR43481	-0.57735	1.1547	-0.57735
asRNA:CR43629	-0.194536	-0.888438	1.08297
asRNA:CR43637	-0.57735	1.1547	-0.57735
asRNA:CR43683	-0.618539	-0.535158	1.1537
asRNA:CR43723	0.689796	-1.14686	0.45706
asRNA:CR43730	0.419661	0.721789	-1.14145
asRNA:CR43767	-0.57735	-0.57735	1.1547
asRNA:CR43786	-0.57735	-0.57735	1.1547
asRNA:CR43787	-0.912324	-0.156822	1.06915
asRNA:CR43809	-0.0992241	1.04591	-0.946689
asRNA:CR43812	0.869785	0.222835	-1.09262
asRNA:CR43824	0	0	0
asRNA:CR43833	-0.307953	1.11776	-0.809805
asRNA:CR43864	0.993407	0.0130571	-1.00646
asRNA:CR43868	1.03743	-0.0796145	-0.957813
asRNA:CR43875	0.294411	0.819744	-1.11416
asRNA:CR43889	-0.649777	-0.501757	1.15153
asRNA:CR43906	-0.11235	1.05143	-0.93908
asRNA:CR43916	0.767676	0.36316	-1.13084
asRNA:CR43933	1.11322	-0.290986	-0.822234
asRNA:CR43944	-1.08734	0.880234	0.207101
asRNA:CR43957	-0.114707	1.05241	-0.9377
asRNA:CR43964	0.450068	0.695878	-1.14595
asRNA:CR43981	-0.969747	1.02773	-0.0579834
asRNA:CR44019	-0.57735	-0.57735	1.1547
asRNA:CR44021	1.15238	-0.639517	-0.512866
asRNA:CR44029	-1.07336	0.168002	0.905358
asRNA:CR44030	-0.638993	-0.513429	1.15242
asRNA:CR44031	0.6357	0.516964	-1.15266
asRNA:CR44045	-0.57735	1.1547	-0.57735
asRNA:CR44046	-1.14123	0.418323	0.722908
asRNA:CR44047	-0.57735	-0.57735	1.1547
asRNA:CR44049	-0.57735	-0.57735	1.1547
asRNA:CR44053	-1.0521	0.113974	0.93813
asRNA:CR44054	-0.57735	-0.57735	1.1547
asRNA:CR44064	1.05413	-0.118892	-0.935239
asRNA:CR44065	0.623906	0.529508	-1.15341
asRNA:CR44067	-0.57735	-0.57735	1.1547
asRNA:CR44069	0	0	0
asRNA:CR44093	-1.10905	0.832927	0.276122
asRNA:CR44095	0.901384	0.174313	-1.0757
asRNA:CR44114	-0.851374	-0.249865	1.10124
asRNA:CR44116	-0.57735	-0.57735	1.1547
asRNA:CR44119	-0.745316	-0.391134	1.13645
asRNA:CR44124	-0.57735	-0.57735	1.1547
asRNA:CR44134	-0.684412	1.14762	-0.463204
asRNA:CR44137	-0.57735	-0.57735	1.1547
asRNA:CR44147	1.10116	-0.249601	-0.851557
asRNA:CR44160	-1.1475	0.685234	0.462269
asRNA:CR44168	0.175789	0.900449	-1.07624
asRNA:CR44169	1.14589	-0.696238	-0.449653
asRNA:CR44176	-0.57735	-0.57735	1.1547
asRNA:CR44179	0.358273	0.77151	-1.12978
asRNA:CR44182	0	0	0
asRNA:CR44201	-0.751785	-0.383129	1.13491
asRNA:CR44224	-1.12255	0.326953	0.795599
asRNA:CR44228	-1.05894	0.9282	0.130739
asRNA:CR44266	0.92558	0.135102	-1.06068
asRNA:CR44267	0.372135	0.760578	-1.13271
asRNA:CR44291	1.0422	-0.0905517	-0.951645
asRNA:CR44321	-0.57735	-0.57735	1.1547
asRNA:CR44340	-1.10634	0.839543	0.266796
asRNA:CR44367	-0.106683	1.04906	-0.942381
asRNA:CR44368	1.0637	-0.142746	-0.920957
asRNA:CR44370	0	0	0
asRNA:CR44372	-0.57735	-0.57735	1.1547
asRNA:CR44374	1.1547	-0.57735	-0.57735
asRNA:CR44375	1.03179	-0.964851	-0.0669352
asRNA:CR44381	-1.0548	0.120532	0.934271
asRNA:CR44382	-0.0706643	-0.962794	1.03346
asRNA:CR44386	-0.909764	1.07071	-0.160948
asRNA:CR44390	1.11108	-0.283269	-0.827808
asRNA:CR44416	-0.57735	-0.57735	1.1547
asRNA:CR44429	-1.09324	0.868522	0.224717
asRNA:CR44431	0.279987	0.830164	-1.11015
asRNA:CR44512	-0.57735	-0.57735	1.1547
asRNA:CR44599	1.15446	-0.557015	-0.597449
asRNA:CR44600	0	0	0
asRNA:CR44690	-0.017802	1.00878	-0.99098
asRNA:CR44703	0	0	0
asRNA:CR44704	-0.530647	1.15347	-0.622826
asRNA:CR44724	0	0	0
asRNA:CR44793	1.14127	-0.41857	-0.722702
asRNA:CR44806	-0.18235	-0.896277	1.07863
asRNA:CR44807	0.2303	0.864759	-1.09506
asRNA:CR44841	-0.57735	1.1547	-0.57735
asRNA:CR44843	-0.732797	-0.406426	1.13922
asRNA:CR44849	1.13953	-0.408183	-0.731344
asRNA:CR44872	-0.182568	1.07871	-0.896138
asRNA:CR44891	0	0	0
asRNA:CR44892	1.15442	-0.555198	-0.599223
asRNA:CR44910	-1.14591	0.696098	0.449814
asRNA:CR44911	-0.57735	-0.57735	1.1547
asRNA:CR44959	-0.57735	-0.57735	1.1547
asRNA:CR44960	1.10058	-0.247728	-0.852852
asRNA:CR44961	-0.108052	-0.941586	1.04964
asRNA:CR44962	0.631731	0.521205	-1.15294
asRNA:CR44968	0	0	0
asRNA:CR44969	0.514669	0.63784	-1.15251
asRNA:CR44972	0	0	0
asRNA:CR44976	-0.466429	-0.681571	1.148
asRNA:CR44981	-0.57735	-0.57735	1.1547
asRNA:CR44982	1.1547	-0.57735	-0.57735
asRNA:CR44987	0.625397	0.527932	-1.15333
asRNA:CR44989	0	0	0
asRNA:CR44992	0	0	0
asRNA:CR44996	0	0	0
asRNA:CR44998	0.510452	0.641758	-1.15221
asRNA:CR45000	-0.381686	-0.752946	1.13463
asRNA:CR45007	0.121667	0.9336	-1.05527
asRNA:CR45009	-0.57735	-0.57735	1.1547
asRNA:CR45026	-0.337664	-0.787456	1.12512
asRNA:CR45028	-0.285226	1.11163	-0.826399
asRNA:CR45044	0.584109	0.570565	-1.15467
asRNA:CR45053	-0.906491	1.07269	-0.166194
asRNA:CR45108	-0.57735	-0.57735	1.1547
asRNA:CR45124	-0.672437	-0.476722	1.14916
asRNA:CR45126	1.02697	-0.0563222	-0.970649
asRNA:CR45129	0	0	0
asRNA:CR45131	0	0	0
asRNA:CR45132	-1.11486	0.297031	0.817833
asRNA:CR45135	-0.57735	-0.57735	1.1547
asRNA:CR45136	-0.57735	-0.57735	1.1547
asRNA:CR45139	0.750978	0.384132	-1.13511
asRNA:CR45140	-0.266202	-0.839962	1.10616
asRNA:CR45141	0.100645	0.945872	-1.04652
asRNA:CR45142	0.558791	0.595713	-1.1545
asRNA:CR45145	0.749725	0.385686	-1.13541
asRNA:CR45149	-0.57735	1.1547	-0.57735
asRNA:CR45160	-0.0264101	1.01294	-0.986533
asRNA:CR45163	-0.57735	1.1547	-0.57735
asRNA:CR45164	-1.10907	0.832873	0.276198
asRNA:CR45171	-1.0648	0.145554	0.919246
asRNA:CR45175	1.14202	-0.423237	-0.718786
asRNA:CR45182	1.04678	-0.945516	-0.101263
asRNA:CR45185	0	0	0
asRNA:CR45189	-0.57735	-0.57735	1.1547
asRNA:CR45190	1.0703	-0.15985	-0.910447
asRNA:CR45195	0.295663	0.818831	-1.11449
asRNA:CR45198	-0.306919	1.11749	-0.810569
asRNA:CR45202	0	0	0
asRNA:CR45208	-0.57735	-0.57735	1.1547
asRNA:CR45210	-0.57735	-0.57735	1.1547
asRNA:CR45214	1.08226	-0.192504	-0.889753
asRNA:CR45264	0.424627	0.717616	-1.14224
asRNA:CR45272	0	0	0
asRNA:CR45275	1.05644	-0.12455	-0.93189
asRNA:CR45281	-0.57735	-0.57735	1.1547
asRNA:CR45326	-0.57735	-0.57735	1.1547
asRNA:CR45350	0.488309	0.662027	-1.15034
asRNA:CR45366	-0.57735	-0.57735	1.1547
asRNA:CR45367	0.262922	0.842271	-1.10519
asRNA:CR45396	-0.607701	-0.546458	1.15416
asRNA:CR45397	-0.249977	1.10127	-0.851297
asRNA:CR45445	-0.941632	-0.107973	1.04961
asRNA:CR45466	-0.232957	-0.862959	1.09592
asRNA:CR45467	-0.57735	-0.57735	1.1547
asRNA:CR45468	-0.57735	-0.57735	1.1547
asRNA:CR45479	-1.1522	0.510265	0.641931
asRNA:CR45485	1.1264	-0.343182	-0.783223
asRNA:CR45501	-0.775395	-0.353297	1.12869
asRNA:CR45518	-0.57735	-0.57735	1.1547
asRNA:CR45520	-0.57735	1.1547	-0.57735
asRNA:CR45528	-1.03979	0.0850053	0.954784
asRNA:CR45549	-0.57735	-0.57735	1.1547
asRNA:CR45600	0	0	0
asRNA:CR45604	0.516613	0.636027	-1.15264
asRNA:CR45612	-0.57735	-0.57735	1.1547
asRNA:CR45620	0	0	0
asRNA:CR45682	-0.57735	-0.57735	1.1547
asRNA:CR45683	0.909806	0.160881	-1.07069
asRNA:CR45686	1.01213	-0.0247162	-0.987413
asRNA:CR45713	-0.57735	-0.57735	1.1547
asRNA:CR45714	-0.985245	-0.0288836	1.01413
asRNA:CR45778	1.00058	-0.00115142	-0.999424
asRNA:CR45789	-0.0939418	1.04366	-0.949714
asRNA:CR45798	0.744039	0.392705	-1.13674
asRNA:CR45800	-0.57735	1.1547	-0.57735
asRNA:CR45804	0	0	0
asRNA:CR45806	0.211111	0.877589	-1.0887
asRNA:CR45813	0	0	0
asRNA:CR45814	-0.123104	1.05585	-0.932749
asRNA:CR45815	-0.57735	-0.57735	1.1547
asRNA:CR45818	0.632203	0.520702	-1.1529
asRNA:CR45822	-0.57735	-0.57735	1.1547
asRNA:CR45827	-0.57735	-0.57735	1.1547
asRNA:CR45831	-0.57735	1.1547	-0.57735
asRNA:CR45835	-0.57735	-0.57735	1.1547
asRNA:CR45865	1.15199	-0.507533	-0.644459
asRNA:CR45870	-0.962923	-0.0704294	1.03335
asRNA:CR45871	-1.08301	0.194639	0.888371
asRNA:CR45873	0.056911	0.970329	-1.02724
asRNA:CR45874	0.401003	-1.13826	0.73726
asRNA:CR45875	-0.57735	-0.57735	1.1547
asRNA:CR45889	-0.57735	1.1547	-0.57735
asRNA:CR45891	-0.57735	-0.57735	1.1547
asRNA:CR45892	0	0	0
asRNA:CR45895	1.01159	-0.0235933	-0.987995
asRNA:CR45896	-0.57735	-0.57735	1.1547
asRNA:CR45907	1.15377	-0.53666	-0.617106
asRNA:CR45908	-0.57735	-0.57735	1.1547
asRNA:CR45912	-0.57735	-0.57735	1.1547
asRNA:CR45925	-0.594169	1.15454	-0.560367
asRNA:CR45926	0.590832	0.563762	-1.15459
asRNA:CR45928	-1.06445	0.919789	0.144664
asRNA:CR45929	0.564549	0.590058	-1.15461
asRNA:CR45943	-0.710984	-0.432466	1.14345
asRNA:CR45951	-0.57735	1.1547	-0.57735
asRNA:CR45952	-0.57735	-0.57735	1.1547
asRNA:CR45968	0.791994	0.331711	-1.12371
asRNA:CR45969	-0.57735	-0.57735	1.1547
asRNA:CR45970	0	0	0
asRNA:CR45999	0.517892	0.634833	-1.15272
asRNA:CR46018	0.721913	0.419512	-1.14143
asRNA:CR46020	0	0	0
asRNA:CR46029	-0.141797	1.06333	-0.921533
asRNA:CR46033	0	0	0
asRNA:CR46044	-0.57735	-0.57735	1.1547
asRNA:CR46048	-0.57735	-0.57735	1.1547
asRNA:CR46050	-0.57735	-0.57735	1.1547
asRNA:CR46055	-0.977166	-0.0442023	1.02137
asRNA:CR46067	0.164613	0.90748	-1.07209
asRNA:CR46081	1.12342	-0.330518	-0.7929
asRNA:CR46089	1.14362	-0.710025	-0.433592
asRNA:CR46091	0.692019	0.454511	-1.14653
asRNA:CR46093	-0.579014	-0.575685	1.1547
asRNA:CR46096	1.14697	-0.689034	-0.457932
asRNA:CR46097	0.128245	0.929691	-1.05794
asRNA:CR46099	-0.57735	-0.57735	1.1547
asRNA:CR46104	0.596498	0.557988	-1.15449
asRNA:CR46105	-0.895734	1.07893	-0.1832
asRNA:CR46109	-1.13463	0.752963	0.381665
asRNA:CR46133	0.495078	0.655884	-1.15096
asRNA:CR46134	0.124815	0.931733	-1.05655
asRNA:CR46135	0.683701	0.464013	-1.14771
asRNA:CR46137	-0.57735	1.1547	-0.57735
asRNA:CR46138	1.15025	-0.487367	-0.662878
asRNA:CR46140	0.896348	0.182239	-1.07859
asRNA:CR46145	0	0	0
asRNA:CR46255	1.1547	-0.57735	-0.57735
asRNA:CR46262	1.02188	-0.0452991	-0.976581
asRNA:CR46354	1.09405	-0.227187	-0.86686
ast	0.673556	0.475467	-1.14902
AstA	-0.57735	1.1547	-0.57735
AstA-R1	0	0	0
asun	0.364253	0.766815	-1.13107
Asx	0.41168	0.728445	-1.14013
Atac1	0.475828	0.673234	-1.14906
Atac2	1.11832	-0.31014	-0.808185
Atac3	1.0219	-0.0453387	-0.976559
ATbp	0.52219	0.630807	-1.153
Ate1	1.14697	-0.45798	-0.688992
Atet	0.144174	0.920088	-1.06426
Atf-2	0.977093	0.0443391	-1.02143
Atf3	-0.510705	-0.641523	1.15223
Atf6	0.973544	0.0509629	-1.02451
Atg1	0.741042	0.396383	-1.13743
Atg10	-1.05823	0.128986	0.929249
Atg101	0.839876	0.266324	-1.1062
Atg12	0.982537	0.0340563	-1.01659
Atg13	0.986518	0.0264401	-1.01296
Atg14	0.755266	0.378793	-1.13406
Atg16	1.13902	-0.40527	-0.73375
Atg17	0.373882	-1.13307	0.759188
Atg18a	0.653773	0.497392	-1.15117
Atg18b	1.07888	-0.895837	-0.183039
Atg2	0.108388	0.941391	-1.04978
Atg3	-0.455879	1.14671	-0.690827
Atg4a	-0.521319	-0.631624	1.15294
Atg4b	0.669765	0.47971	-1.14948
Atg5	1.12796	-0.350008	-0.77795
Atg6	0.193924	0.888835	-1.08276
Atg7	0.241128	0.85739	-1.09852
Atg8a	-0.609593	-0.544496	1.15409
Atg8b	0	0	0
Atg9	0.811866	0.305162	-1.11703
atilla	-0.775617	-0.353011	1.12863
atk	0	0	0
atl	0.114488	0.937829	-1.05232
atms	-0.227142	1.09403	-0.866891
Atox1	0.472948	0.675798	-1.14875
ATP6AP2	0.436982	0.707136	-1.14412
ATP7	0.28184	0.828835	-1.11067
ATP8A	0.778786	0.348929	-1.12772
ATP8B	-0.703848	1.14467	-0.440823
Atpalpha	0.932011	0.124347	-1.05636
ATPCL	0.301513	0.81455	-1.11606
ATPsynB	0.495815	0.655213	-1.15103
ATPsynbeta	0.524856	0.628299	-1.15316
ATPsynbetaL	-0.57735	1.1547	-0.57735
ATPsynC	-0.772182	-0.357415	1.1296
ATPsynCF6	0.513702	0.63874	-1.15244
ATPsynCF6L	0	0	0
ATPsynD	0.628116	0.52505	-1.15317
ATPsyndelta	0.532747	0.620834	-1.15358
ATPsynE	-0.637112	-0.51545	1.15256
ATPsynepsilonL	-0.821646	-0.291797	1.11344
ATPsynF	-0.773588	-0.355615	1.1292
ATPsynG	0.488441	0.661908	-1.15035
ATPsyngamma	0.556201	0.598244	-1.15445
ATPsynGL	0	0	0
ATPsynO	0.518536	0.634231	-1.15277
AttA	-0.57735	-0.57735	1.1547
AttB	-0.581253	-0.573439	1.15469
AttC	-0.775702	1.1286	-0.352902
AttD	-1.13605	0.747041	0.389007
Atu	0.545019	0.609089	-1.15411
Atx-1	1.01287	-0.986617	-0.0262485
Atx2	0.596746	0.557735	-1.15448
Atxn7	0.529206	0.624192	-1.1534
aub	-0.6011	1.15437	-0.55327
aurA	-0.234046	1.09627	-0.86222
aurB	-0.11566	1.0528	-0.937141
aust	1.1547	-0.57735	-0.57735
aux	0.504318	0.647423	-1.15174
ave	0.909674	-1.07077	0.161093
Aven	-0.799813	1.12117	-0.32136
awd	-0.666769	-0.48305	1.14982
Awh	-0.57735	-0.57735	1.1547
axed	0.823292	0.289526	-1.11282
Axn	1.02274	-0.0471489	-0.975592
Axs	-0.706274	-0.437991	1.14426
Axud1	-1.15327	0.526855	0.626414
az2	-0.676852	1.14861	-0.471762
b	-0.289922	1.11293	-0.823006
B-H2	-0.57735	-0.57735	1.1547
B4	-0.800953	-0.31984	1.12079
B52	-0.347801	-0.779659	1.12746
B9d1	1.1547	-0.57735	-0.57735
bab1	-0.807137	1.11869	-0.311552
bab2	-0.57735	-0.57735	1.1547
babo	-0.476429	-0.672698	1.14913
babos	-0.57735	-0.57735	1.1547
Bacc	-0.462928	-0.684654	1.14758
baf	-0.842841	-0.26211	1.10495
bai	-0.939711	-0.111271	1.05098
Balat	-0.57735	-0.57735	1.1547
Baldspot	-0.183902	-0.895285	1.07919
ball	-0.648277	-0.503389	1.15167
bam	-0.710625	1.14351	-0.432887
Bap111	0.5139	0.638555	-1.15246
Bap170	0.146978	0.918377	-1.06536
Bap55	0.98128	0.0364445	-1.01772
Bap60	-0.596255	1.15449	-0.558237
barc	-0.896976	-0.181255	1.07823
bark	-1.14727	0.686901	0.460368
barr	-0.293978	1.11404	-0.82006
baz	0.981363	0.0362855	-1.01765
bb8	1.14261	-0.715619	-0.426994
bbc	-0.632295	-0.520604	1.1529
bbg	-0.514193	-0.638283	1.15248
BBIP1	0.561693	0.592867	-1.15456
BBS8	-1.08836	0.210097	0.878259
bbx	0.432974	0.710551	-1.14353
bc10	0.317643	0.802598	-1.12024
BCAS2	-0.796639	-0.325576	1.12221
bchs	-0.942174	1.04921	-0.10704
BCL7-like	0.185238	0.89443	-1.07967
bcn92	-0.79442	-0.328512	1.12293
Bdbt	-0.971111	-0.0554685	1.02658
bdg	-0.628153	-0.525011	1.15316
bdl	-0.921836	1.06313	-0.141297
Bdp1	0.906595	0.166028	-1.07262
be	-1.14725	0.687058	0.46019
BEAF-32	0.710084	-1.14361	0.433524
beag	0.961796	0.0724664	-1.03426
beat-Ib	-0.57735	-0.57735	1.1547
beat-Ic	0	0	0
beat-IIIc	-0.57735	-0.57735	1.1547
beat-VI	0	0	0
beat-VII	0	0	0
beg	0.884943	0.199912	-1.08486
bel	-0.986981	-0.0255476	1.01253
Bem46	-0.0876236	1.04093	-0.953305
ben	0.490647	0.659911	-1.15056
Best1	-0.547825	-0.60638	1.15421
Best2	0	0	0
Bet1	-1.03498	0.960899	0.0740824
Bet3	0.681251	0.466792	-1.14804
Bet5	-0.857664	-0.240727	1.09839
beta-Man	1.06097	-0.135832	-0.925141
beta-PheRS	-0.735426	1.13866	-0.403235
beta-Spec	0.692959	0.453431	-1.14639
beta'COP	0.542328	0.611678	-1.15401
beta3GalTII	1.15469	-0.574177	-0.580517
beta4GalNAcTA	0.704076	0.440557	-1.14463
beta4GalNAcTB	0.302386	0.813909	-1.11629
beta4GalT7	-0.0126385	1.00626	-0.993621
betaCOP	0.723095	0.4181	-1.14119
betaggt-I	-0.576615	-0.578086	1.1547
betaggt-II	0.753747	0.380688	-1.13443
betaGlu	0.663329	0.486868	-1.1502
betaTub56D	-0.428673	-0.7142	1.14287
betaTub60D	-0.88184	1.0865	-0.204656
betaTub85D	-0.2743	-0.834225	1.10852
betaTub97EF	0.889114	-1.08261	0.193493
Bgb	1.13723	-0.741892	-0.395342
bgcn	-0.57735	-0.57735	1.1547
bgm	-0.718764	-0.423264	1.14203
BHD	0.501307	0.65019	-1.1515
bi	0	0	0
BI-1	0.248077	0.852611	-1.10069
bib	-0.727422	1.14033	-0.412911
bic	-0.522258	-0.630742	1.153
BicD	-0.643628	-0.508432	1.15206
bif	-0.385963	-0.749501	1.13546
BigH1	-1.13703	0.394228	0.7428
bigmax	0.907794	-1.0719	0.16411
Bin1	-0.845694	-0.258035	1.10373
bin3	-0.394928	-0.742229	1.13716
bip1	-1.08821	0.209652	0.878553
bip2	-0.744301	-0.392383	1.13668
Bka	-0.687653	-0.45951	1.14716
blanks	-0.57735	-0.57735	1.1547
Blimp-1	-0.57735	1.1547	-0.57735
Blm	0.0265835	0.986443	-1.01303
Blos1	-1.04217	0.0904987	0.951675
Blos2	-0.630945	1.15299	-0.522043
Blos3	-1.15468	0.582969	0.571713
Blos4	-1.15397	0.541463	0.612509
blot	-0.57735	-0.57735	1.1547
blow	0.533479	0.620137	-1.15362
blp	-0.168218	-0.905223	1.07344
blw	-0.367707	-0.764088	1.1318
bma	-0.57735	-0.57735	1.1547
Bmcp	-0.94723	1.04551	-0.0982826
bmm	-1.07575	0.901297	0.17445
bnb	-0.472729	1.14872	-0.675993
bnl	1.08353	-0.196126	-0.887407
boca	-0.378004	-0.755898	1.1339
bocks	0.798177	0.323535	-1.12171
BOD1	1.05292	-0.115945	-0.936974
boi	0.227206	0.866847	-1.09405
bol	-0.556303	-0.598145	1.15445
Bom1	-0.57735	1.1547	-0.57735
Bom3	-0.57735	1.1547	-0.57735
bon	0.353418	0.7753	-1.12872
bond	-1.07102	0.909254	0.161768
bonsai	-1.015	0.984289	0.0307146
bor	-0.653201	-0.498019	1.15122
bora	1.1039	-0.258595	-0.845303
BORCS5	1.04669	-0.101058	-0.945634
BORCS6	0.848402	0.254151	-1.10255
BORCS7	-1.14	0.410923	0.729074
borr	0.325386	0.796782	-1.12217
botv	0.679953	0.468261	-1.14821
bou	-0.452662	-0.693627	1.14629
bowl	-0.902453	-0.172619	1.07507
BoYb	0.276276	0.832817	-1.10909
br	0.852514	0.248217	-1.10073
Br140	0.396599	0.740866	-1.13747
brat	-0.491501	-0.659136	1.15064
Brca2	1.11858	-0.311138	-0.807444
Brd	0	0	0
Brd8	1.08285	-0.194182	-0.888668
Bre1	0.117481	0.93607	-1.05355
Brf	0.518403	0.634355	-1.15276
brk	0.292596	0.821065	-1.11366
brm	-0.0159336	1.00787	-0.991938
Brms1	-0.479589	-0.669873	1.14946
brn	-0.421972	1.14182	-0.719849
brp	0.814369	-1.11613	0.30176
bru1	1.1547	-0.57735	-0.57735
bru2	0	0	0
bru3	0.875478	0.2143	-1.08978
Bruce	0.768138	0.362573	-1.13071
brun	0.942834	0.105902	-1.04874
brv3	0	0	0
BRWD3	-0.328919	1.12303	-0.794112
brwl	0.793079	0.330282	-1.12336
bs	-0.821708	1.11342	-0.291711
bsf	0.44737	0.698212	-1.14558
Bsg	0.49946	0.651883	-1.15134
Bsg25D	-1.13126	0.766084	0.36518
bsk	1.08998	-0.214898	-0.87508
bt	0.800109	0.320965	-1.12107
BTBD9	1.09147	-0.219367	-0.872105
BtbVII	0.429972	0.7131	-1.14307
btd	-0.57735	-0.57735	1.1547
BthD	1.14428	-0.438094	-0.706185
Btk29A	0.334359	0.789979	-1.12434
btl	-0.683085	1.1478	-0.464712
btsz	-0.732575	1.13927	-0.406694
btz	-0.105461	1.04855	-0.94309
Bub1	0.87658	0.212637	-1.08922
Bub3	-0.697676	-0.44799	1.14567
BubR1	0.590393	0.564209	-1.1546
bug	-0.976348	1.02208	-0.0457345
Bug22	-0.643701	-0.508352	1.15205
BuGZ	0.618888	0.534791	-1.15368
bun	0.696166	-1.1459	0.449735
bur	-0.836503	-0.271093	1.1076
bves	0.737753	0.400402	-1.13816
bw	-0.00924485	1.00459	-0.995346
bwa	0.779328	0.348229	-1.12756
Bx	-0.374678	1.13323	-0.758553
Bx42	-0.599515	1.15441	-0.554898
by	0.589859	0.56475	-1.15461
bys	0.103655	0.944135	-1.04779
c(2)M	1.10764	-0.271254	-0.836389
c(3)G	-0.66798	-0.481701	1.14968
c11.1	0.691612	0.454978	-1.14659
c12.1	-1.08597	0.203143	0.882832
c12.2	1.08068	-0.188064	-0.892616
C1GalTA	0.617197	0.536565	-1.15376
C3G	-1.11717	0.305715	0.811457
ca	0.891357	0.190019	-1.08138
Ca-alpha1D	-0.57735	-0.57735	1.1547
Ca-alpha1T	1.14997	-0.665399	-0.484573
Ca-Ma2d	-0.96244	1.03374	-0.0713026
CaBP1	0.950649	-1.04295	0.0923014
cac	-0.661024	1.15044	-0.489418
cact	-0.592989	-0.561569	1.15456
cactin	-0.608984	1.15411	-0.545128
Cad86C	-0.637658	-0.514864	1.15252
Cad87A	0.482102	0.66762	-1.14972
Cad96Ca	-1.11628	0.813955	0.302323
Cad99C	-0.57735	-0.57735	1.1547
CadN	0	0	0
CadN2	0	0	0
Cadps	0.0308863	0.984199	-1.01509
Caf1-105	0.693265	0.453078	-1.14634
Caf1-180	1.02929	-0.967881	-0.0614081
Caf1-55	0.513286	0.639126	-1.15241
cag	-0.503403	-0.648264	1.15167
CAH1	-0.57735	1.1547	-0.57735
CAH13	0	0	0
CAH2	-0.174267	1.07568	-0.901412
CAH3	-0.585922	1.15466	-0.568736
CAH7	0.920526	0.143453	-1.06398
CAHbeta	1.14921	-0.672032	-0.477175
cal1	1.15468	-0.57198	-0.582704
CalpA	-0.434122	1.1437	-0.709575
CalpB	0.629856	0.523201	-1.15306
CalpC	-0.994644	-0.0106264	1.00527
Calr	0.58475	0.569919	-1.15467
Cals	-0.696305	1.14588	-0.449575
Calx	1.1484	-0.469914	-0.67849
calypso	1.12962	-0.357498	-0.772117
Cam	-0.246749	-0.853527	1.10028
CaMKI	-0.903008	-0.171739	1.07475
CaMKII	-0.349318	-0.778485	1.1278
Camp	0.40234	0.736162	-1.1385
Camta	0.697085	0.448675	-1.14576
can	-0.57735	-0.57735	1.1547
cana	0.485927	0.664179	-1.15011
CanA-14F	0.995083	0.00976341	-1.00485
CanB	-0.57735	1.1547	-0.57735
CanB2	0.26506	0.840767	-1.10583
Cand1	1.04657	-0.100778	-0.945795
CAP	-0.61432	-0.539574	1.15389
Cap-D2	0.560781	0.593762	-1.15454
Cap-D3	0.954131	0.0861627	-1.04029
Cap-G	0.917805	0.147913	-1.06572
Cap-H2	0.599793	0.554613	-1.15441
Caper	-0.40975	1.1398	-0.730047
Capr	1.14671	-0.690821	-0.455886
caps	1.15246	-0.514006	-0.638457
capt	-1.13501	0.38364	0.751374
capu	-0.653733	-0.497436	1.15117
car	1.05236	-0.114592	-0.937767
CARPB	-1.08138	0.891352	0.190028
CarT	0.773262	0.356033	-1.12929
CASK	-1.15198	0.644621	0.507356
casp	1.00707	-0.0142925	-0.992777
cass	0.41663	0.724323	-1.14095
Cat	0.655188	0.495842	-1.15103
cathD	0.472035	0.676609	-1.14864
Catsup	0.175017	0.900938	-1.07596
caup	0	0	0
cav	0.614963	-1.15387	0.538902
caz	0.570426	0.584247	-1.15467
cbc	-1.15214	0.642651	0.509487
Cbl	-0.587772	1.15464	-0.566866
CBP	0.476333	0.672784	-1.14912
Cbp20	-1.15328	0.52706	0.62622
Cbp53E	-0.57735	1.1547	-0.57735
Cbp80	0.69645	0.449408	-1.14586
cbs	0.880878	0.206121	-1.087
Cbs	1.01374	-0.0280783	-0.985665
cbt	0.886506	0.197513	-1.08402
Cby	-1.13063	0.768431	0.3622
Cc2d2a	-0.57735	1.1547	-0.57735
CCAP	-1.1522	0.510347	0.641854
CCDC53	0.688376	0.458685	-1.14706
Ccdc56	-0.602428	-0.551904	1.15433
Ccdc58	-0.904151	-0.169924	1.07408
Ccdc85	-0.804721	-0.314799	1.11952
CCHa2	0.963237	0.0698621	-1.0331
Cchl	-0.395458	-0.741797	1.13726
Ccm3	-0.0234522	-0.988068	1.01152
Ccs	-0.937964	1.05222	-0.114257
CCT1	0.514447	0.638047	-1.15249
CCT2	-0.677984	-0.470486	1.14847
CCT3	0.554888	0.599525	-1.15441
CCT4	-0.521945	-0.631037	1.15298
CCT5	0.529657	0.623764	-1.15342
CCT6	0.618628	0.535064	-1.15369
CCT7	0.582654	0.57203	-1.15468
CCT8	1.14122	-0.418237	-0.72298
Ccz1	-0.765877	1.13132	-0.365442
cd	0	0	0
CD98hc	-0.431322	-0.711955	1.14328
Cda5	0	0	0
CDase	0.902625	0.172346	-1.07497
cdc14	-0.244357	1.09953	-0.855174
Cdc16	0.352046	0.776367	-1.12841
Cdc23	0.33595	0.788766	-1.12472
Cdc27	0.671162	0.478149	-1.14931
Cdc2rk	0.0450952	0.97669	-1.02178
Cdc37	-0.742856	-0.39416	1.13702
Cdc42	0.53469	0.618984	-1.15367
CDC45L	-0.861252	1.09672	-0.23547
Cdc5	0.716569	0.425869	-1.14244
CDC50	0.0273051	0.986068	-1.01337
Cdc6	0.387045	0.748627	-1.13567
Cdc7	0.914389	0.153477	-1.06787
Cdep	-0.206791	1.08723	-0.880438
CdGAPr	-0.335461	1.1246	-0.789139
cdi	0.48364	0.666238	-1.14988
cDIP	1.04378	-0.949552	-0.0942261
Cdk1	-1.13298	0.37346	0.759523
Cdk12	1.15426	-0.549468	-0.604791
Cdk2	-0.0178115	1.00879	-0.990975
CDK2AP1	0.676209	0.472485	-1.14869
Cdk4	0.316322	0.803585	-1.11991
Cdk5	-0.790451	-0.33374	1.12419
Cdk5alpha	-0.672875	-0.476231	1.14911
Cdk7	1.05282	-0.937111	-0.115711
Cdk8	0.654152	0.496977	-1.15113
Cdk9	0.399045	0.738866	-1.13791
Cdlc2	0	0	0
cdm	0.48156	0.668107	-1.14967
Cds	0.622626	0.530859	-1.15348
Cec2	-1.15426	0.549448	0.60481
CecA1	-0.595865	-0.558636	1.1545
CecA2	-0.59267	-0.561894	1.15456
CecB	-0.644398	-0.507598	1.152
CecC	-1.02504	0.0521087	0.972927
Ced-12	0.846417	0.257	-1.10342
ced-6	0.560447	0.59409	-1.15454
Cen	0.40828	0.731264	-1.13954
CenB1A	-1.14081	0.725062	0.415746
CenG1A	-0.60451	-0.549757	1.15427
Cenp-C	0.578758	0.575942	-1.1547
Cep135	0.480886	-1.1496	0.668711
cep290	-0.57735	-0.57735	1.1547
Cep89	-0.57735	-0.57735	1.1547
Cep97	-1.05766	0.930105	0.127551
cer	-0.105827	1.04871	-0.942878
Cerk	-1.15465	0.567961	0.586689
cert	0.57699	0.57771	-1.1547
cerv	1.09296	-0.869084	-0.22388
Cf2	0.857649	0.240749	-1.0984
Cfp1	1.13556	-0.386479	-0.749085
cg	-0.727409	1.14034	-0.412928
CG10005	1.12827	-0.351415	-0.776858
CG10011	-0.102369	1.04725	-0.944878
CG10026	0.850078	0.251737	-1.10182
CG10031	-0.57735	-0.57735	1.1547
CG10038	-0.820845	1.11374	-0.292898
CG10041	-0.665988	-0.483918	1.14991
CG10050	1.1278	-0.349318	-0.778485
CG10053	0.993794	0.0122993	-1.00609
CG10055	-0.447513	-0.698089	1.1456
CG10063	-0.0792175	1.03725	-0.958035
CG10064	1.00108	-0.0021548	-0.998921
CG10068	0.438148	0.706139	-1.14429
CG10075	-0.130259	-0.928487	1.05875
CG10077	0.737315	0.400937	-1.13825
CG10082	-0.899041	-0.178009	1.07705
CG10086	0	0	0
CG10089	0	0	0
CG10096	0.423887	0.718239	-1.14213
CG10098	-0.850963	-0.25046	1.10142
CG10103	-0.492559	-0.658176	1.15073
CG10126	-0.343443	1.12647	-0.783022
CG10132	-0.105657	1.04863	-0.942976
CG10137	0.902425	0.172664	-1.07509
CG10139	-1.15448	0.55772	0.59676
CG10147	-0.718471	1.14208	-0.423611
CG10151	-0.57735	-0.57735	1.1547
CG10165	-0.129845	-0.928735	1.05858
CG10166	-1.09525	0.230905	0.86435
CG10171	-0.354855	1.12904	-0.774181
CG10184	-0.264958	-0.840839	1.1058
CG10185	0.912998	-1.06873	0.155732
CG10188	0.388184	0.747707	-1.13589
CG10189	-0.973285	1.02473	-0.0514445
CG10194	0.984064	0.0311447	-1.01521
CG10195	-0.999996	-7.44765e-06	1
CG10208	0.453649	0.692768	-1.14642
CG10209	0.838506	0.268265	-1.10677
CG10214	-0.948062	-0.0968322	1.04489
CG10222	-0.987852	-0.0238694	1.01172
CG10232	-1.05692	0.931188	0.125732
CG10237	-0.57735	1.1547	-0.57735
CG1024	-0.231252	1.09537	-0.864114
CG10252	-0.134393	1.0604	-0.926008
CG10254	0.72143	0.420089	-1.14152
CG10265	-0.479889	-0.669605	1.14949
CG10268	-0.176018	1.07632	-0.900305
CG10274	0.541917	0.612073	-1.15399
CG10283	-1.15437	0.60113	0.553239
CG10286	1.12274	-0.327705	-0.795031
CG10307	-1.14257	0.715864	0.426704
CG10311	-0.88205	1.08639	-0.204336
CG10321	0.65437	0.496739	-1.15111
CG10324	-0.0422232	-0.97822	1.02044
CG10333	-0.812477	-0.304332	1.11681
CG10336	0.595156	0.55936	-1.15452
CG10337	-0.825694	-0.286203	1.1119
CG10338	-1.06355	0.921191	0.14236
CG10340	-0.573	-0.58169	1.15469
CG10341	-0.756019	1.13387	-0.377852
CG10343	-0.928925	-0.129527	1.05845
CG10344	0.871931	0.219627	-1.09156
CG10347	-0.954242	-0.085966	1.04021
CG10353	-0.778415	-0.349408	1.12782
CG10359	1.11447	-0.295562	-0.818906
CG10361	0	0	0
CG10365	0.3649	0.766305	-1.1312
CG10366	0.207037	0.880276	-1.08731
CG10375	-1.00044	0.000875657	0.999562
CG10376	-0.732096	-0.407273	1.13937
CG10383	1.14581	-0.449085	-0.696729
CG10384	0	0	0
CG10395	-0.875999	-0.213513	1.08951
CG10405	-1.14981	0.666844	0.482966
CG10407	1.14122	-0.418231	-0.722986
CG10413	0.552654	0.6017	-1.15435
CG10417	-0.751622	1.13495	-0.383333
CG10418	-0.868702	-0.22445	1.09315
CG10425	0.714953	0.427782	-1.14274
CG10428	0.411434	0.72865	-1.14008
CG10431	0.218255	0.872847	-1.0911
CG10433	-0.865939	-0.228553	1.09449
CG10435	0.0553094	-1.02651	0.971197
CG10444	-0.483397	1.14985	-0.666457
CG10445	-0.0695537	1.03296	-0.963407
CG10462	1.09302	-0.868977	-0.22404
CG10463	-1.14424	0.70643	0.437808
CG10465	-1.12907	0.774061	0.355009
CG10466	0.868281	-1.09336	0.225076
CG10467	-0.811886	1.11702	-0.305134
CG10469	-0.0469408	1.02264	-0.975703
CG10470	-0.915744	1.06702	-0.151275
CG10472	1.12504	-0.337336	-0.787707
CG10492	0.81316	0.303405	-1.11656
CG10494	1.05397	-0.118498	-0.935471
CG10495	0.484086	0.665836	-1.14992
CG10505	-0.159385	1.07012	-0.910735
CG10508	0.789357	0.335176	-1.12453
CG10512	-0.941836	1.04946	-0.107622
CG10516	-0.817936	-0.29689	1.11483
CG10527	-0.517606	-0.6351	1.15271
CG10543	0.374081	0.759029	-1.13311
CG10550	-0.57735	1.1547	-0.57735
CG10555	-1.15308	0.629529	0.523549
CG10561	1.11983	-0.316033	-0.803801
CG10565	0.997847	0.00429132	-1.00214
CG10576	-0.999926	-0.000148458	1.00007
CG10581	-1.1466	0.455036	0.691561
CG10584	0.0224986	0.988561	-1.01106
CG10589	0	0	0
CG10600	0.347313	0.780036	-1.12735
CG10602	0.595492	0.559016	-1.15451
CG10616	1.13585	-0.38797	-0.74788
CG10621	1.13016	-0.360014	-0.770147
CG10623	0.248329	0.852437	-1.10077
CG10628	0.563371	0.591217	-1.15459
CG10631	0.0570357	0.970262	-1.0273
CG10638	0.216335	0.874126	-1.09046
CG10646	-0.848211	1.10264	-0.254425
CG10650	0.967394	-1.02969	0.0622994
CG10654	0.901638	0.173911	-1.07555
CG10657	1.1547	-0.57735	-0.57735
CG10660	1.11373	-0.292843	-0.820885
CG10663	1.14895	-0.474842	-0.674113
CG10669	0.411561	0.728544	-1.14011
CG10672	0.395926	0.741415	-1.13734
CG10674	-1.15333	0.625315	0.528018
CG10681	-0.782958	1.12648	-0.343526
CG10694	-0.57735	-0.57735	1.1547
CG10702	-0.210903	1.08863	-0.877727
CG10730	0	0	0
CG10731	-1.10576	0.84093	0.264829
CG10734	0	0	0
CG10737	0.967235	-1.02982	0.0625893
CG10738	-0.57735	-0.57735	1.1547
CG1074	0.758732	-1.13319	0.374453
CG10747	-0.48859	1.15036	-0.661773
CG10764	-0.0419402	1.02031	-0.97837
CG1077	-0.57735	-0.57735	1.1547
CG10778	-0.950466	1.04309	-0.0926226
CG10795	0.772501	0.357007	-1.12951
CG10799	-0.57735	1.1547	-0.57735
CG10801	0	0	0
CG10802	1.01649	-0.0338348	-0.982653
CG10803	0.805853	0.313279	-1.11913
CG10804	-0.733312	1.13911	-0.405802
CG10809	-1.12345	0.330632	0.792813
CG10814	0.992833	0.0141833	-1.00702
CG10822	0	0	0
CG10841	0	0	0
CG10859	0.804748	0.314763	-1.11951
CG10862	0	0	0
CG10863	-0.537737	-0.616078	1.15381
CG10866	1.02113	-0.0437026	-0.977432
CG10869	-0.57735	-0.57735	1.1547
CG10874	0.34834	0.779242	-1.12758
CG10877	0.724678	0.416205	-1.14088
CG10889	0.921852	0.141271	-1.06312
CG10898	-0.338184	1.12524	-0.787059
CG1090	0.710742	0.432749	-1.14349
CG10903	-0.450254	-0.695717	1.14597
CG10904	1.14724	-0.687129	-0.460109
CG10907	-0.69438	1.14618	-0.451795
CG10914	0.601664	0.55269	-1.15435
CG10916	-0.125856	1.05697	-0.931114
CG1092	0.606715	0.547479	-1.15419
CG10927	-1.09218	0.2215	0.870679
CG10931	0	0	0
CG10932	0.196095	0.887427	-1.08352
CG10936	0	0	0
CG10939	0.711528	0.431825	-1.14335
CG10947	-0.57735	-0.57735	1.1547
CG10948	-0.836744	-0.270754	1.1075
CG10949	0.462195	0.685298	-1.14749
CG10958	-1.15187	0.645961	0.505905
CG10959	1.11411	-0.294237	-0.819871
CG10960	-0.704738	-0.439786	1.14452
CG10962	0.965083	0.0665131	-1.0316
CG10970	-0.57735	1.1547	-0.57735
CG10973	-0.841915	-0.263429	1.10534
CG10979	-0.84619	1.10352	-0.257326
CG10984	0.435505	0.708396	-1.1439
CG11000	0.670948	0.478388	-1.14934
CG11007	-0.803721	-0.31614	1.11986
CG1103	0.468003	0.680181	-1.14818
CG11030	-1.15429	0.55049	0.6038
CG11034	-0.57735	-0.57735	1.1547
CG11035	1.14365	-0.433829	-0.709824
CG1105	-1.13076	0.767937	0.362827
CG11050	0.277988	-1.10958	0.831594
CG11052	0	0	0
CG11068	0	0	0
CG11069	0	0	0
CG11070	0.424904	0.717382	-1.14229
CG11076	0.655009	-1.15105	0.496038
CG11077	-0.961722	-0.0725994	1.03432
CG11089	-1.13997	0.729201	0.41077
CG11095	-0.801936	1.12046	-0.318528
CG11103	0.484171	0.66576	-1.14993
CG11106	0	0	0
CG11109	0.505367	-1.15182	0.646457
CG11110	-0.921987	-0.141049	1.06304
CG11122	0.305718	0.811455	-1.11717
CG11123	1.0907	-0.217056	-0.873646
CG11125	-0.958247	-0.0788388	1.03709
CG11127	1.05015	-0.940879	-0.109268
CG11134	0.797118	-1.12206	0.324941
CG11137	-1.10623	0.266422	0.839807
CG11141	0.931956	-1.0564	0.12444
CG11151	-0.621108	1.15357	-0.532457
CG11155	1.09043	-0.216256	-0.874178
CG11158	0.0416606	-1.02018	0.978519
CG1116	-0.286275	1.11192	-0.825643
CG11164	0.834991	0.273223	-1.10821
CG11168	0.868192	0.225209	-1.0934
CG11170	0.921552	0.141765	-1.06332
CG11178	0.996223	-1.00373	0.00751097
CG11180	-0.663134	-0.487084	1.15022
CG11200	-0.819366	1.1143	-0.294931
CG11236	-0.57735	-0.57735	1.1547
CG1124	-0.709396	1.14373	-0.434332
CG11241	-1.10538	0.841839	0.263537
CG11247	-0.79621	1.12235	-0.326144
CG11248	-0.418671	-0.722617	1.14129
CG11249	1.07761	-0.179539	-0.898069
CG11257	-0.624898	1.15336	-0.52846
CG11267	-0.833437	-0.275407	1.10884
CG11275	-0.57735	1.1547	-0.57735
CG11279	-1.15469	0.572761	0.581927
CG1129	-0.438884	-0.70551	1.14439
CG11291	0	0	0
CG11294	-0.57735	1.1547	-0.57735
CG11307	-0.731064	-0.408521	1.13959
CG11309	-0.0743441	1.0351	-0.960753
CG11313	-0.685488	1.14747	-0.461979
CG11318	0	0	0
CG11319	-0.57735	-0.57735	1.1547
CG11322	0	0	0
CG11327	0	0	0
CG11334	0.589005	0.565616	-1.15462
CG11342	-1.1018	0.251687	0.850113
CG11350	0	0	0
CG11353	-0.57735	-0.57735	1.1547
CG11357	-0.122552	-0.933076	1.05563
CG1136	0	0	0
CG11360	-1.14754	0.68495	0.462592
CG11362	1.1547	-0.57735	-0.57735
CG11367	-0.182063	1.07852	-0.89646
CG1137	0	0	0
CG11373	0	0	0
CG11374	-0.57735	1.1547	-0.57735
CG11377	-0.557028	1.15446	-0.597437
CG11378	-0.57735	-0.57735	1.1547
CG11396	-1.15469	0.573369	0.581323
CG11398	-0.662871	1.15025	-0.487376
CG11399	0.874027	0.216483	-1.09051
CG11400	1.14803	-0.681325	-0.466708
CG11403	-0.118084	1.0538	-0.935715
CG11406	0.106981	0.942208	-1.04919
CG11413	1.02672	-0.0557792	-0.970943
CG11414	0.793078	0.330283	-1.12336
CG11417	-0.281497	-0.829081	1.11058
CG1142	-0.785088	-0.340755	1.12584
CG11426	0	0	0
CG1143	-1.12565	0.339936	0.785716
CG11436	0.000259029	0.99987	-1.00013
CG11438	-0.57735	1.1547	-0.57735
CG11444	-0.400595	-0.737595	1.13819
CG11447	-1.14212	0.423843	0.718276
CG11454	-0.367326	-0.76439	1.13172
CG11456	-0.291512	-0.821852	1.11336
CG1146	-0.428558	-0.714297	1.14286
CG11474	0.843634	0.26098	-1.10461
CG11475	-0.800997	1.12078	-0.319781
CG11486	1.00928	-0.990456	-0.0188227
CG11504	0.174999	0.90095	-1.07595
CG11523	0.777317	0.350824	-1.12814
CG11537	-0.831357	-0.27832	1.10968
CG11539	-0.32208	1.12135	-0.799271
CG11555	-0.990297	-0.0191306	1.00943
CG11560	1.15277	-0.518545	-0.634223
CG11562	0.849499	-1.10207	0.252571
CG11563	-0.622347	-0.531152	1.1535
CG11583	-0.712101	-0.43115	1.14325
CG11586	-0.254495	1.10266	-0.848163
CG11590	0.875509	-1.08976	0.214253
CG11593	-0.402879	-0.735719	1.1386
CG11594	0.728172	0.412009	-1.14018
CG11596	-0.886217	1.08417	-0.197957
CG11597	-1.079	0.183384	0.895617
CG11598	1.07895	-0.183234	-0.895712
CG11601	-0.683669	-0.464048	1.14772
CG1161	0.441996	0.702841	-1.14484
CG11619	-0.0203028	1.01	-0.989694
CG11638	0.0558318	-1.02675	0.970914
CG11655	-1.11081	0.828492	0.282318
CG11656	-0.57735	1.1547	-0.57735
CG11658	0.585845	0.568814	-1.15466
CG11663	0	0	0
CG11674	0	0	0
CG11679	-0.474564	1.14892	-0.67436
CG11686	-0.860867	-0.236036	1.0969
CG11695	1.04812	-0.104443	-0.943679
CG11696	-0.624444	1.15338	-0.528939
CG11699	0.979252	0.040278	-1.01953
CG11700	-1.10911	0.27633	0.832779
CG11710	-0.821781	1.11339	-0.291611
CG1172	-1.15418	0.547211	0.606974
CG11722	-0.836802	-0.270672	1.10747
CG11723	1.02873	-0.0601774	-0.968552
CG11737	0.12439	0.931986	-1.05638
CG11752	0.271453	-1.1077	0.836248
CG11753	-1.03196	0.0673152	0.964642
CG11755	-0.121806	1.05532	-0.933518
CG11756	-0.57735	1.1547	-0.57735
CG11760	0.33733	0.787712	-1.12504
CG11768	0.680832	0.467267	-1.1481
CG11771	0.516804	0.635849	-1.15265
CG11777	1.14804	-0.466754	-0.681285
CG11779	-0.120831	1.05493	-0.934094
CG11781	0.116167	0.936843	-1.05301
CG11786	-0.57735	-0.57735	1.1547
CG11788	-1.11878	0.806869	0.311913
CG11790	-0.70039	-0.444846	1.14524
CG11791	-0.415479	-0.725284	1.14076
CG11807	-0.524974	1.15316	-0.628187
CG11808	-0.796197	-0.326162	1.12236
CG11811	-0.725684	-0.414999	1.14068
CG11815	0	0	0
CG11825	1.13847	-0.402141	-0.736326
CG11835	0	0	0
CG11836	-0.468436	1.14823	-0.679799
CG11837	-0.783413	-0.342935	1.12635
CG11839	-0.643007	-0.509103	1.15211
CG11842	-0.57735	-0.57735	1.1547
CG11852	-0.57735	-0.57735	1.1547
CG11854	-0.57735	1.1547	-0.57735
CG11857	-1.05705	0.126065	0.93099
CG11858	-0.80607	-0.312987	1.11906
CG11873	-0.703077	-0.441722	1.1448
CG11882	-0.25177	1.10182	-0.850055
CG11883	-0.66279	-0.487465	1.15026
CG11885	-0.882466	1.08617	-0.203702
CG11893	-0.57735	-0.57735	1.1547
CG11899	0.15843	0.911328	-1.06976
CG11902	0.438557	0.70579	-1.14435
CG11906	-1.12124	0.799608	0.321633
CG11911	-0.57735	1.1547	-0.57735
CG11920	1.12709	-0.346192	-0.780903
CG11927	0.768894	0.36161	-1.1305
CG11929	0	0	0
CG11961	0.702633	0.442239	-1.14487
CG11964	-0.815653	-0.30001	1.11566
CG11970	1.15098	-0.495279	-0.655701
CG11975	-0.786252	1.12549	-0.339237
CG11980	0.0182138	-1.00898	0.990769
CG11983	0.819779	0.294364	-1.11414
CG11986	1.14467	-0.4408	-0.703868
CG11999	-0.818236	1.11472	-0.296479
CG12003	-0.57735	1.1547	-0.57735
CG12004	-0.291583	-0.821801	1.11338
CG12007	-0.5883	-0.566331	1.15463
CG12010	0.0212849	0.989188	-1.01047
CG12012	-1.13383	0.37763	0.756196
CG12016	0.381669	0.752959	-1.13463
CG12024	1.13283	-0.760139	-0.372687
CG12025	-0.933914	1.05505	-0.121135
CG12054	-0.913441	-0.155014	1.06845
CG12056	1.0009	-0.00179658	-0.9991
CG12065	0.497344	0.653817	-1.15116
CG12071	-0.80883	-0.309269	1.1181
CG12075	-0.57735	1.1547	-0.57735
CG1208	-0.57735	1.1547	-0.57735
CG12081	0.412552	0.727721	-1.14027
CG12084	-1.14986	0.66643	0.483427
CG12091	0.908492	0.162992	-1.07148
CG12093	-0.20532	1.08672	-0.881404
CG12096	0.971401	-1.02633	0.054934
CG12099	0.579235	0.575463	-1.1547
CG12104	0.611995	0.541999	-1.15399
CG12105	-0.928099	1.05901	-0.130908
CG12106	-1.08207	0.191979	0.890093
CG12107	-0.850952	-0.250476	1.10143
CG12112	-0.615755	-0.538074	1.15383
CG12116	-1.04274	0.950927	0.0918142
CG12118	-0.875118	1.08996	-0.214841
CG12121	0.635911	0.516738	-1.15265
CG12123	-0.178835	-0.898517	1.07735
CG12126	0	0	0
CG12128	0.0742532	0.960804	-1.03506
CG12129	-0.435921	-0.708041	1.14396
CG1213	0	0	0
CG12133	-0.57735	-0.57735	1.1547
CG12134	-1.10781	0.835978	0.271834
CG12155	1.15437	-0.600968	-0.553406
CG12159	1.14203	-0.423269	-0.718759
CG12163	0.889943	-1.08215	0.192211
CG12170	0.418602	0.722675	-1.14128
CG12171	0.0717623	0.962186	-1.03395
CG12173	-0.824991	-0.287178	1.11217
CG12177	0.838141	0.268781	-1.10692
CG12179	0.224019	0.868991	-1.09301
CG1218	0.804172	0.315536	-1.11971
CG12182	0.0983752	-1.04555	0.947177
CG12184	0.247837	0.852776	-1.10061
CG12194	0	0	0
CG12204	0.217513	0.873341	-1.09085
CG12206	1.12135	-0.322069	-0.79928
CG12209	-0.57735	-0.57735	1.1547
CG12213	0.042241	0.97821	-1.02045
CG12219	0.182817	0.895979	-1.0788
CG12224	-0.57735	-0.57735	1.1547
CG12236	-0.162293	1.07122	-0.908927
CG12237	1.0295	-0.0618706	-0.967628
CG12241	0.686011	0.461384	-1.14739
CG12253	-0.684883	-0.462669	1.14755
CG12259	-0.716386	-0.426086	1.14247
CG12267	-0.927224	-0.132367	1.05959
CG1227	-1.13339	0.375471	0.757921
CG12279	-1.15287	0.632786	0.520079
CG12288	-0.798319	-0.323347	1.12167
CG12290	-0.648805	-0.502815	1.15162
CG12299	-0.215479	1.09017	-0.874695
CG12301	-1.15312	0.628797	0.524327
CG12316	-0.0493955	1.02378	-0.974387
CG12320	0.00761514	-1.00379	0.996171
CG12321	-0.809258	1.11795	-0.308691
CG12325	-1.07098	0.161649	0.909328
CG1233	-0.00285874	1.00143	-0.998568
CG12333	0.733409	0.405684	-1.13909
CG12338	-0.321465	-0.799734	1.1212
CG1234	0.531781	-1.15353	0.621751
CG12341	-0.882399	-0.203803	1.0862
CG12343	-0.87392	-0.216644	1.09056
CG12344	0.991447	0.0168929	-1.00834
CG12355	0	0	0
CG1236	1.12951	-0.357019	-0.772492
CG12362	0	0	0
CG12374	-0.57735	-0.57735	1.1547
CG12375	0.318777	0.80175	-1.12053
CG12376	-0.57735	1.1547	-0.57735
CG12379	-0.775978	-0.352547	1.12852
CG12384	-0.979534	-0.0397471	1.01928
CG1239	-0.00320176	1.0016	-0.998395
CG12391	0.0405816	-1.01967	0.979091
CG12446	-0.57735	-0.57735	1.1547
CG12448	1.1547	-0.57735	-0.57735
CG1246	-0.57735	-0.57735	1.1547
CG12470	1.13573	-0.748372	-0.387362
CG12493	0	0	0
CG12499	1.11526	-0.816754	-0.298507
CG12512	0.770882	0.359077	-1.12996
CG12519	1.13365	-0.376743	-0.756905
CG12531	0	0	0
CG12535	0.80907	0.308945	-1.11802
CG12541	0	0	0
CG12547	-0.420692	-0.720924	1.14162
CG12560	-0.900846	-0.175163	1.07601
CG12567	-0.952578	-0.0889069	1.04148
CG12576	-0.0649211	1.03088	-0.965958
CG12581	-0.57735	-0.57735	1.1547
CG12592	0.679266	0.469037	-1.1483
CG12594	-0.57735	-0.57735	1.1547
CG12605	0	0	0
CG12608	-0.342543	-0.783714	1.12626
CG12617	-0.790817	1.12408	-0.33326
CG12643	0.623663	0.529764	-1.15343
CG1265	-0.882759	1.08601	-0.203254
CG12655	0	0	0
CG12659	-0.617315	-0.536441	1.15376
CG12674	-0.57735	-0.57735	1.1547
CG12689	-0.57735	1.1547	-0.57735
CG12692	0	0	0
CG12693	-0.57735	1.1547	-0.57735
CG12698	0	0	0
CG12699	0.339225	0.786262	-1.12549
CG12702	-0.139941	1.0626	-0.922658
CG1271	0.442828	0.702127	-1.14495
CG12713	0.0389533	0.979954	-1.01891
CG12717	-0.852977	1.10052	-0.247546
CG12725	-0.57735	-0.57735	1.1547
CG12728	1.13147	-0.765297	-0.366178
CG12730	-0.133873	1.06019	-0.92632
CG12744	0.524001	0.629104	-1.1531
CG12746	-0.555281	-0.599142	1.15442
CG1275	0.664787	0.485252	-1.15004
CG12766	0	0	0
CG12768	1.04391	-0.094538	-0.949374
CG12773	1.14671	-0.455904	-0.690805
CG12795	-0.477857	-0.671423	1.14928
CG12811	1.10221	-0.253021	-0.849186
CG12814	-0.893897	1.07997	-0.186068
CG12818	-0.286785	1.11206	-0.825274
CG12822	-0.356482	-0.772911	1.12939
CG12824	-0.57735	1.1547	-0.57735
CG12825	-0.0301156	1.01472	-0.984602
CG12826	-0.57735	-0.57735	1.1547
CG12836	0.632168	0.520739	-1.15291
CG12848	0.774371	0.354611	-1.12898
CG12851	-1.15346	0.530473	0.622992
CG12853	-0.57735	1.1547	-0.57735
CG12857	-0.57735	-0.57735	1.1547
CG12860	0	0	0
CG12861	-0.57735	1.1547	-0.57735
CG12863	0.691578	0.455017	-1.14659
CG12868	-0.446777	1.1455	-0.698724
CG12869	1.01246	-0.0254063	-0.987055
CG12877	0.94024	-1.0506	0.110364
CG1288	-0.57735	-0.57735	1.1547
CG12880	0	0	0
CG12883	-0.749179	-0.386363	1.13554
CG12895	-0.968263	-0.0607078	1.02897
CG12896	-0.442411	-0.702485	1.1449
CG12909	-0.765842	-0.365488	1.13133
CG12910	-0.57735	-0.57735	1.1547
CG12913	-0.972736	1.0252	-0.052463
CG12917	-1.05471	0.9344	0.120313
CG12920	0.394086	0.742915	-1.137
CG12923	0	0	0
CG12926	0.815233	0.300582	-1.11582
CG12929	-1.14894	0.474662	0.674273
CG12934	0.543561	0.610493	-1.15405
CG12935	-0.0193465	1.00953	-0.990186
CG12942	0.935899	0.117772	-1.05367
CG12945	-1.03881	0.0827627	0.956047
CG12947	-1.15408	0.544292	0.609789
CG12948	-1.08786	0.879217	0.208645
CG12963	-0.57735	-0.57735	1.1547
CG12971	-1.08745	0.207442	0.880009
CG12974	-0.509994	-0.642181	1.15218
CG12975	-0.50463	-0.647136	1.15177
CG12984	-0.57735	1.1547	-0.57735
CG12990	-0.57735	-0.57735	1.1547
CG12991	-0.57735	1.1547	-0.57735
CG12992	0	0	0
CG13000	0	0	0
CG13001	0.976231	0.0459536	-1.02218
CG13003	-0.57735	-0.57735	1.1547
CG13004	0.931464	-1.05673	0.125268
CG13005	0.455721	0.690964	-1.14669
CG13010	-1.06964	0.158118	0.911521
CG13012	0.923829	0.138006	-1.06184
CG13014	0.548677	0.605556	-1.15423
CG13016	-0.618111	1.15372	-0.535606
CG13018	-0.0692549	1.03283	-0.963572
CG13021	-0.57735	1.1547	-0.57735
CG13024	0	0	0
CG13025	0.864021	0.23139	-1.09541
CG13032	0	0	0
CG1307	0.969363	-1.02805	0.0586882
CG13074	-0.400235	1.13813	-0.73789
CG13077	-0.165319	-0.907039	1.07236
CG13078	-0.57735	-0.57735	1.1547
CG13085	0.873261	0.217634	-1.09089
CG13086	0.783283	0.343104	-1.12639
CG13088	0.0279038	0.985756	-1.01366
CG1309	-0.568263	1.15465	-0.58639
CG13096	-0.7809	-0.346196	1.1271
CG13097	-0.331203	-0.79238	1.12358
CG13101	0.512533	0.639827	-1.15236
CG13102	-0.57735	-0.57735	1.1547
CG13108	-0.57735	1.1547	-0.57735
CG13116	-0.554159	-0.600235	1.15439
CG13117	-0.22983	-0.865077	1.09491
CG13123	-0.0989791	1.04581	-0.94683
CG13124	-0.697661	-0.448008	1.14567
CG13126	1.15378	-0.616786	-0.536995
CG13127	0	0	0
CG13138	-1.15255	0.515281	0.637269
CG13144	1.00039	-0.000779999	-0.99961
CG13148	1.1547	-0.57735	-0.57735
CG13151	1.09141	-0.219179	-0.87223
CG13154	-0.57735	1.1547	-0.57735
CG13155	-0.57735	1.1547	-0.57735
CG13159	-0.57735	-0.57735	1.1547
CG1316	-0.789551	1.12447	-0.33492
CG13160	-0.57735	-0.57735	1.1547
CG13168	-0.57735	1.1547	-0.57735
CG1317	0.938673	0.113046	-1.05172
CG13175	-0.110493	1.05066	-0.940165
CG13185	0.984156	0.030968	-1.01512
CG13192	-0.520727	-0.63218	1.15291
CG13197	-0.803793	-0.316044	1.11984
CG13204	0.406594	0.732658	-1.13925
CG13220	-0.930428	-0.127009	1.05744
CG13229	-1.08741	0.207318	0.880091
CG13231	0.923122	0.139176	-1.0623
CG1324	-0.57735	1.1547	-0.57735
CG13244	-0.57735	-0.57735	1.1547
CG13247	0	0	0
CG13248	-0.321934	1.12132	-0.799381
CG13252	-0.100226	-0.946113	1.04634
CG13255	1.14497	-0.442941	-0.70203
CG13258	-0.57735	-0.57735	1.1547
CG13282	-0.116464	1.05313	-0.936668
CG13293	-0.914012	1.0681	-0.154089
CG13295	0.425013	-1.1423	0.71729
CG13300	1.06984	-0.158651	-0.911191
CG13314	-0.57735	-0.57735	1.1547
CG13315	0.169675	0.904308	-1.07398
CG13319	0.406102	-1.13917	0.733064
CG13321	0.454127	-1.14648	0.692353
CG13337	-0.57735	-0.57735	1.1547
CG13339	-0.412883	1.14033	-0.727446
CG13344	0.931001	0.126046	-1.05705
CG13358	-0.57735	1.1547	-0.57735
CG13359	0	0	0
CG13360	-0.916177	1.06675	-0.15057
CG13362	0	0	0
CG13364	-0.827409	-0.283823	1.11123
CG13365	-0.837723	-0.269372	1.10709
CG13366	-0.952959	-0.0882345	1.04119
CG13367	1.12534	-0.786748	-0.33859
CG13369	1.09808	-0.239743	-0.858337
CG13373	1.14866	-0.676489	-0.47217
CG13375	-0.931562	-0.125103	1.05666
CG13377	0.736293	0.402181	-1.13847
CG13384	0.919032	0.145906	-1.06494
CG13390	-0.955546	1.0392	-0.0836526
CG13392	1.1447	-0.441022	-0.703677
CG13397	-0.677681	1.14851	-0.470827
CG13398	1.15458	-0.562725	-0.591853
CG13405	-0.709818	1.14365	-0.433836
CG13409	0.0530996	0.972392	-1.02549
CG13430	0.137664	0.924036	-1.0617
CG13436	0.131681	0.927636	-1.05932
CG13437	-0.665304	-0.484677	1.14998
CG1344	0.511189	0.641074	-1.15226
CG13442	0	0	0
CG13449	0	0	0
CG13457	-0.982551	1.01658	-0.0340285
CG13458	-1.06772	0.153093	0.914626
CG13482	-0.621916	-0.531607	1.15352
CG13484	0.827487	0.283715	-1.1112
CG13488	-0.792175	-0.331473	1.12365
CG13506	-0.57735	-0.57735	1.1547
CG13510	1.01399	-0.0285861	-0.9854
CG13511	1.02684	-0.0560462	-0.970798
CG13516	0.820469	-1.11388	0.293416
CG13531	0.0466751	0.975845	-1.02252
CG1354	-0.862995	-0.232905	1.0959
CG13540	-0.57735	1.1547	-0.57735
CG13544	-0.57735	-0.57735	1.1547
CG13551	-0.688078	-0.459025	1.1471
CG13559	0.130527	-1.05885	0.928327
CG13562	0.308128	0.809675	-1.1178
CG13563	-0.550194	1.15428	-0.604088
CG13578	-0.57735	1.1547	-0.57735
CG1358	-0.667169	1.14977	-0.482605
CG13585	1.07905	-0.183523	-0.895528
CG13599	0.3449	0.781899	-1.1268
CG1360	0.836435	0.271189	-1.10762
CG13601	-0.983751	1.01549	-0.031742
CG13603	0.346766	0.780459	-1.12723
CG13604	-0.825612	-0.286318	1.11193
CG13605	0.85385	0.24628	-1.10013
CG13607	1.1547	-0.57735	-0.57735
CG13609	-1.15354	0.531986	0.621556
CG13623	0.592193	0.562379	-1.15457
CG13625	-0.272191	-0.835725	1.10792
CG13630	-0.0116527	-0.994123	1.00578
CG13631	-1.13078	0.767868	0.362915
CG13654	-1.15231	0.511833	0.640476
CG13659	-0.57735	1.1547	-0.57735
CG13663	-1.138	0.399522	0.738475
CG13667	1.15297	-0.521746	-0.631224
CG13671	0.95656	0.0818497	-1.03841
CG13676	0.633999	0.518784	-1.15278
CG13689	0.173913	0.901636	-1.07555
CG13690	-0.725233	-0.41554	1.14077
CG13692	1.14714	-0.687791	-0.459352
CG13693	0	0	0
CG13694	-0.57735	1.1547	-0.57735
CG13698	0	0	0
CG13707	0	0	0
CG1371	0.477558	0.67169	-1.14925
CG13739	0	0	0
CG13741	-1.11954	0.80466	0.314881
CG13742	-0.499755	-0.651612	1.15137
CG13743	1.15039	-0.488841	-0.661547
CG13747	0	0	0
CG13749	-0.57735	1.1547	-0.57735
CG13751	-0.730409	1.13972	-0.409313
CG13760	1.05167	-0.112918	-0.938748
CG13766	0.167663	0.905571	-1.07323
CG13773	-0.616987	-0.536785	1.15377
CG13775	1.02046	-0.0422677	-0.978196
CG13784	0.904376	-1.07394	0.169567
CG13807	0.475502	0.673525	-1.14903
CG13813	1.15454	-0.593924	-0.560616
CG13827	-1.03101	0.965797	0.0652137
CG13850	-0.78342	-0.342926	1.12635
CG13868	-0.576394	-0.578306	1.1547
CG13871	0	0	0
CG13875	-0.57735	-0.57735	1.1547
CG13876	-0.899542	1.07676	-0.17722
CG13877	-0.57735	1.1547	-0.57735
CG13887	-0.623064	-0.530396	1.15346
CG13891	0	0	0
CG13893	1.02891	-0.968333	-0.0605794
CG13895	0.816343	0.299068	-1.11541
CG13896	-0.667173	-0.4826	1.14977
CG13898	0	0	0
CG13901	0.0959077	-1.0445	0.948591
CG13907	0.398402	0.739392	-1.13779
CG13917	0.830588	0.279395	-1.10998
CG13919	-0.376016	-0.757486	1.1335
CG13920	0.943667	0.104464	-1.04813
CG13921	-0.849092	1.10225	-0.253157
CG13926	-1.13941	0.407505	0.731905
CG13928	-1.11454	0.295843	0.8187
CG13933	-0.0660197	1.03137	-0.965354
CG13937	-0.383578	-0.751424	1.135
CG1394	-0.57735	1.1547	-0.57735
CG13982	1.01	-0.0203154	-0.989688
CG13992	0.881298	0.205482	-1.08678
CG13994	0.409115	0.730573	-1.13969
CG14005	0.421458	0.720281	-1.14174
CG14015	0	0	0
CG14020	1.1547	-0.57735	-0.57735
CG14024	-0.57735	-0.57735	1.1547
CG14036	1.12583	-0.340705	-0.785126
CG14042	1.12202	-0.324775	-0.797243
CG14043	0.958024	0.0792372	-1.03726
CG14044	-0.644836	1.15196	-0.507124
CG14050	-0.859495	-0.238049	1.09754
CG14053	0	0	0
CG14054	-0.57735	1.1547	-0.57735
CG14057	1.06312	-0.141253	-0.921863
CG1407	-0.814298	-0.301857	1.11615
CG14072	-0.57735	1.1547	-0.57735
CG14073	-0.838606	-0.268123	1.10673
CG14074	-0.870541	1.09225	-0.221707
CG14077	-0.898559	1.07733	-0.178768
CG14079	0.0714555	0.962356	-1.03381
CG14100	-0.360941	1.13036	-0.76942
CG14102	0.211589	0.877274	-1.08886
CG14104	-1.14881	0.675306	0.473502
CG14105	-1.15402	0.611258	0.542765
CG14109	0	0	0
CG14113	-0.57735	-0.57735	1.1547
CG14117	0.342219	0.783964	-1.12618
CG14130	-0.50014	-0.65126	1.1514
CG14132	-0.57735	-0.57735	1.1547
CG14135	-0.539059	-0.614813	1.15387
CG14142	0.298822	0.816524	-1.11535
CG14154	-0.829447	1.11043	-0.280987
CG1416	-1.09237	0.222075	0.870294
CG14174	-1.15469	0.580741	0.573953
CG1418	-1.07144	0.908569	0.162867
CG14182	-0.597195	1.15447	-0.557276
CG14183	-1.14348	0.710817	0.432661
CG14184	-1.15467	0.584156	0.570517
CG14194	1.0195	-0.0402236	-0.979281
CG14196	0	0	0
CG14200	0.838229	0.268657	-1.10689
CG14207	-0.981558	1.01747	-0.0359169
CG14210	-1.12514	0.337728	0.787407
CG14212	-0.57735	1.1547	-0.57735
CG14220	-1.15081	0.493384	0.657426
CG14221	1.15145	-0.650683	-0.500769
CG14223	-1.1456	0.698133	0.447462
CG14229	-0.270118	1.10731	-0.837195
CG14230	-1.14541	0.699325	0.446082
CG14231	-0.950507	1.04306	-0.0925508
CG14232	-0.560252	1.15453	-0.594281
CG14252	-0.103493	-0.944229	1.04772
CG14253	-0.533217	-0.620386	1.1536
CG14257	-0.868063	1.09346	-0.2254
CG14260	-0.349728	1.12789	-0.778167
CG14262	-0.57735	-0.57735	1.1547
CG14269	-0.57735	1.1547	-0.57735
CG14270	-1.1545	0.558791	0.595713
CG14273	-0.57735	-0.57735	1.1547
CG14275	0	0	0
CG14285	0.696396	-1.14587	0.44947
CG14286	-0.973895	-0.0503112	1.02421
CG14292	-0.621509	-0.532036	1.15354
CG14294	0	0	0
CG14297	0	0	0
CG14302	1.00072	-0.00144918	-0.999275
CG14305	-0.57735	1.1547	-0.57735
CG14312	-1.01097	0.988651	0.0223237
CG14314	0	0	0
CG14322	-0.357263	-0.772301	1.12956
CG14325	-1.15076	0.492883	0.657881
CG14332	1.11562	-0.299855	-0.815767
CG1434	-1.00624	0.993642	0.012596
CG14341	-0.139395	-0.922989	1.06238
CG14346	0	0	0
CG14352	-0.50369	-0.648001	1.15169
CG14355	-0.57735	1.1547	-0.57735
CG14367	-1.12922	0.773537	0.355681
CG1440	0.533113	0.620485	-1.1536
CG14401	0.156271	0.912665	-1.06894
CG14402	-0.57735	1.1547	-0.57735
CG14406	-0.100923	1.04663	-0.945712
CG14407	-0.755106	-0.378993	1.1341
CG14408	-1.15105	0.496066	0.654983
CG14411	0.993905	0.0120809	-1.00599
CG14414	-0.13722	-0.924304	1.06152
CG14431	-0.57735	-0.57735	1.1547
CG14434	-1.05157	0.112698	0.938877
CG14435	0.725545	0.415166	-1.14071
CG14440	0.915261	0.152061	-1.06732
CG14441	0.778395	0.349434	-1.12783
CG14442	0.73517	0.403546	-1.13872
CG14443	0	0	0
CG14450	0.194127	0.888703	-1.08283
CG14451	0	0	0
CG14459	0	0	0
CG14464	-0.752404	-0.382359	1.13476
CG14478	0.824493	0.287867	-1.11236
CG14480	-0.712539	-0.430633	1.14317
CG14483	-1.10312	0.256005	0.847111
CG14488	0	0	0
CG14490	-0.768478	-0.36214	1.13062
CG14491	0	0	0
CG14502	-0.346607	1.12719	-0.780582
CG14511	1.14435	-0.705794	-0.438551
CG14512	-0.927095	-0.132583	1.05968
CG14516	1.02464	-0.051242	-0.973394
CG14535	0.245234	0.854571	-1.0998
CG14540	-1.0946	0.86571	0.228893
CG14543	0.543965	-1.15407	0.610104
CG14544	-0.769044	1.13046	-0.361419
CG14545	-0.57735	1.1547	-0.57735
CG14556	-0.820678	1.11381	-0.293128
CG14561	-1.13538	0.749843	0.385541
CG14562	0.638854	0.513579	-1.15243
CG14566	-0.57735	1.1547	-0.57735
CG14567	-0.871996	-0.21953	1.09153
CG14572	-0.57735	-0.57735	1.1547
CG14579	-0.57735	1.1547	-0.57735
CG14589	-0.951953	1.04196	-0.0900094
CG14605	-0.57735	-0.57735	1.1547
CG14609	0.904558	0.169276	-1.07383
CG1461	-0.57735	-0.57735	1.1547
CG14610	-0.659907	-0.490651	1.15056
CG14613	-0.19271	1.08233	-0.88962
CG14615	0.405928	0.733207	-1.13914
CG14618	-0.786989	1.12526	-0.338274
CG14621	0.589981	0.564627	-1.15461
CG14628	-0.57735	-0.57735	1.1547
CG14629	-0.730999	1.1396	-0.4086
CG1463	-0.177768	1.07696	-0.899194
CG14630	1.02188	-0.0453025	-0.976579
CG14636	-0.57735	1.1547	-0.57735
CG14641	-0.902494	-0.172555	1.07505
CG14642	-0.389911	1.13622	-0.746308
CG14645	-0.708467	-0.435423	1.14389
CG14646	1.14784	-0.682769	-0.465071
CG14647	0.559746	0.594778	-1.15452
CG14650	0.17337	0.90198	-1.07535
CG14655	-0.336225	1.12478	-0.788556
CG14657	-0.318271	1.1204	-0.802128
CG14658	0	0	0
CG14662	-0.57735	-0.57735	1.1547
CG14664	-0.57735	-0.57735	1.1547
CG14667	-0.494787	1.15094	-0.65615
CG14669	-0.57735	-0.57735	1.1547
CG14671	-0.90759	-0.164437	1.07203
CG14683	0.412949	-1.14034	0.727391
CG14688	-0.659302	-0.491318	1.15062
CG14692	1.06216	-0.923328	-0.138834
CG14693	-0.57735	1.1547	-0.57735
CG14694	-0.57735	-0.57735	1.1547
CG14695	0.329713	0.793511	-1.12322
CG14696	0.81334	0.30316	-1.1165
CG14701	-1.06373	0.142822	0.92091
CG14708	0	0	0
CG14710	0.995329	-1.00461	0.00927782
CG14711	1.04994	-0.108766	-0.941171
CG14712	0.82763	0.283516	-1.11115
CG14715	1.06306	-0.141118	-0.921945
CG14718	-0.57735	1.1547	-0.57735
CG14721	-0.282964	1.11099	-0.828027
CG14722	0.587755	0.566882	-1.15464
CG14740	-0.774115	-0.354939	1.12905
CG14757	-0.412302	1.14023	-0.727929
CG14760	-0.57735	1.1547	-0.57735
CG14762	-0.57735	1.1547	-0.57735
CG14763	0	0	0
CG14764	0.92777	0.131457	-1.05923
CG14767	0.741932	0.395293	-1.13722
CG14777	0.121023	0.933981	-1.055
CG14778	-0.57735	-0.57735	1.1547
CG14780	1.00335	-0.00672863	-0.996619
CG14785	0.938814	0.112805	-1.05162
CG14787	-1.04593	0.946663	0.0992695
CG14797	-0.57735	1.1547	-0.57735
CG14803	0.844124	0.26028	-1.1044
CG14805	-1.10952	0.831762	0.277754
CG14806	-0.724618	-0.416277	1.1409
CG14812	-0.287318	1.11221	-0.824889
CG14814	0.584746	0.569923	-1.15467
CG14817	0.865446	0.229283	-1.09473
CG14818	-1.14827	0.468713	0.679553
CG14829	-0.57735	-0.57735	1.1547
CG14830	1.13062	-0.768482	-0.362134
CG14834	1.1547	-0.57735	-0.57735
CG14855	0.351318	-1.12825	0.776933
CG14856	-0.57735	-0.57735	1.1547
CG1486	1.05591	-0.123252	-0.932661
CG14860	-0.413645	-0.726812	1.14046
CG14864	1.11226	-0.287496	-0.824761
CG14866	-0.57735	1.1547	-0.57735
CG14868	-0.67194	1.14922	-0.477278
CG14879	-0.57735	-0.57735	1.1547
CG14881	0.983795	0.0316579	-1.01545
CG14882	-0.379826	1.13426	-0.754438
CG14883	-0.460771	1.14732	-0.686549
CG14894	-0.326734	-0.795765	1.1225
CG14903	-0.882562	-0.203554	1.08612
CG14906	-0.627624	-0.525572	1.1532
CG14907	-0.797821	-0.324008	1.12183
CG1492	0.700086	0.445199	-1.14528
CG14921	-1.12902	0.774238	0.354781
CG14926	0	0	0
CG14931	0	0	0
CG14932	-0.57735	1.1547	-0.57735
CG14937	-0.997332	1.00265	-0.00531519
CG1494	0.613451	0.540481	-1.15393
CG14957	0.791498	0.332364	-1.12386
CG14961	-0.999422	-0.00115415	1.00058
CG14963	0.954639	0.0852615	-1.0399
CG14964	-0.57735	1.1547	-0.57735
CG14965	1.11223	-0.287395	-0.824834
CG14966	0.240584	0.857762	-1.09835
CG14968	-0.57735	-0.57735	1.1547
CG14969	0.584325	0.570347	-1.15467
CG14971	-0.0788629	1.0371	-0.958234
CG14974	0	0	0
CG14977	-1.03731	0.0793491	0.957962
CG14984	0	0	0
CG14985	-1.02636	0.0549813	0.971375
CG14989	0	0	0
CG14990	-0.420573	-0.721023	1.1416
CG14995	-0.640589	-0.511712	1.1523
CG14997	-0.105339	-0.943161	1.0485
CG15011	-0.113936	1.05209	-0.938152
CG15012	-0.596521	-0.557965	1.15449
CG15014	0.769186	0.361239	-1.13042
CG15019	-0.920563	-0.143392	1.06396
CG15027	1.06129	-0.924666	-0.136619
CG1503	-0.335981	-0.788743	1.12472
CG15034	-0.57735	-0.57735	1.1547
CG15035	1.1547	-0.57735	-0.57735
CG15040	-0.57735	-0.57735	1.1547
CG15043	-0.57735	1.1547	-0.57735
CG15073	0.48632	0.663824	-1.15014
CG15080	0	0	0
CG15083	0.304497	0.812355	-1.11685
CG15084	-0.684295	-0.463337	1.14763
CG15093	1.03438	-0.961647	-0.0727341
CG15097	-0.72624	-0.414332	1.14057
CG15098	-1.03493	0.0739564	0.960969
CG15099	0.712509	0.430669	-1.14318
CG15107	-0.245453	1.09987	-0.85442
CG15109	-0.735645	1.13861	-0.40297
CG15111	0.814767	-1.11598	0.301218
CG15117	0.762049	0.370281	-1.13233
CG15118	1.00584	-0.0117846	-0.994056
CG15120	-0.57735	-0.57735	1.1547
CG15127	0	0	0
CG15128	-0.57735	-0.57735	1.1547
CG1513	-0.488153	-0.662169	1.15032
CG15136	0	0	0
CG15141	1.14146	-0.419737	-0.721725
CG15142	1.1547	-0.57735	-0.57735
CG15143	-0.57735	-0.57735	1.1547
CG15144	0	0	0
CG15145	-0.57735	-0.57735	1.1547
CG15147	-0.57735	-0.57735	1.1547
CG15160	0.624287	0.529105	-1.15339
CG15168	-0.0166222	1.00821	-0.991585
CG15170	-0.420682	1.14161	-0.720932
CG15172	-0.57735	1.1547	-0.57735
CG15177	0	0	0
CG15186	-0.57735	-0.57735	1.1547
CG15196	-0.57735	1.1547	-0.57735
CG15199	-0.57735	-0.57735	1.1547
CG15200	0	0	0
CG15201	-0.57735	-0.57735	1.1547
CG15202	-0.110574	1.05069	-0.940117
CG15209	0.954597	0.0853365	-1.03993
[truncated: 8,393 more rows]

## Sheet: PM4
gene	Unwouned_AverageExpression	Wounded_AverageExpression	Wasp inf. 24h_AverageExpression
128up	-0.937558	-0.114949	1.05251
14-3-3epsilon	0.526612	-1.15326	0.626643
14-3-3zeta	-0.262924	-0.84227	1.10519
140up	1.12517	-0.337877	-0.787293
18SrRNA-Psi:CR41602	0.660169	-1.15053	0.490362
18SrRNA-Psi:CR45861	0.926446	0.133663	-1.06011
18SrRNA:CR41548	0.926419	0.133709	-1.06013
18SrRNA:CR45838	0.919015	0.145934	-1.06495
18SrRNA:CR45841	0.942348	0.10674	-1.04909
18w	0	0	0
26-29-p	0.412519	0.727748	-1.14027
28SrRNA-Psi:CR40596	0.332665	0.791269	-1.12393
28SrRNA-Psi:CR40741	0.911369	0.158364	-1.06973
28SrRNA-Psi:CR41609	1.13079	-0.362943	-0.767846
28SrRNA-Psi:CR45848	0.561228	0.593324	-1.15455
28SrRNA-Psi:CR45851	0.866216	0.228142	-1.09436
28SrRNA-Psi:CR45853	1.02449	-0.0509327	-0.97356
28SrRNA-Psi:CR45855	-0.600662	-0.55372	1.15438
28SrRNA-Psi:CR45859	-0.559544	-0.594975	1.15452
28SrRNA-Psi:CR45860	1.00117	-0.00234195	-0.998827
28SrRNA-Psi:CR45862	1.07809	-0.180864	-0.897225
28SrRNA:CR45837	0.826351	0.285294	-1.11164
28SrRNA:CR45844	0.845069	0.25893	-1.104
312	-0.972258	1.02561	-0.0533489
4E-T	0.0588056	0.9693	-1.02811
5-HT1A	0	0	0
5.8SrRNA-Psi:CR45849	-0.57735	1.1547	-0.57735
5.8SrRNA-Psi:CR45854	-0.57735	-0.57735	1.1547
5.8SrRNA-Psi:CR45857	0	0	0
5.8SrRNA-Psi:CR45863	-0.555426	-0.599	1.15443
5.8SrRNA:CR40454	0	0	0
5.8SrRNA:CR45839	0	0	0
5.8SrRNA:CR45842	0	0	0
5.8SrRNA:CR45852	0	0	0
5PtaseI	-0.637308	1.15255	-0.51524
7B2	0	0	0
7SLRNA:CR32864	0.983736	0.0317704	-1.01551
7SLRNA:CR42652	0.983736	0.0317704	-1.01551
a	-0.254723	1.10273	-0.848004
A16	0.967196	-1.02986	0.0626611
a6	-0.0115767	1.00574	-0.994161
AANAT1	0.88392	0.20148	-1.0854
AANATL2	0	0	0
Aasdh	1.04411	-0.0950032	-0.949108
Aatf	-0.748931	-0.386669	1.1356
aay	1.14928	-0.671434	-0.477844
ab	-0.194995	1.08314	-0.888141
ABCA	0.520764	0.632145	-1.15291
ABCB7	-0.332843	1.12398	-0.791133
ABCD	0.0365678	0.981215	-1.01778
abd-A	0	0	0
Abd-B	-0.57735	-0.57735	1.1547
Abi	0.255566	0.847417	-1.10298
Abl	0.976424	0.0455932	-1.02202
abo	1.03502	-0.0741695	-0.96085
Abp1	0.0849271	0.954828	-1.03976
abs	-0.640285	1.15232	-0.512039
Ac13E	-1.12669	0.782271	0.344418
Ac3	0	0	0
Ac76E	-0.357822	-0.771864	1.12969
Ac78C	-0.778208	-0.349675	1.12788
Acbp1	-1.15409	0.609548	0.544543
Acbp2	1.12046	-0.318516	-0.801945
Acbp3	-0.57735	-0.57735	1.1547
Acbp4	0	0	0
Acbp5	0.819036	0.295382	-1.11442
Acbp6	1.15074	-0.492597	-0.658141
ACC	-0.681336	-0.466696	1.14803
AcCoAS	-0.302945	1.11644	-0.813498
Ace	-0.371923	1.13267	-0.760746
Acer	0.389977	0.746255	-1.13623
Acf	0.342503	0.783745	-1.12625
achi	-1.07978	0.18555	0.89423
acj6	-1.15202	0.644128	0.50789
Ack	0.209199	0.878852	-1.08805
Ack-like	-0.524658	-0.628486	1.15314
Acn	-0.707314	-0.436773	1.14409
Acox57D-d	0.926234	0.134016	-1.06025
Acox57D-p	0.738295	0.399742	-1.13804
Acp95EF	1.07779	-0.180046	-0.897746
Acph-1	0.336307	0.788493	-1.1248
Acsl	-1.00532	0.0107343	0.99459
Act42A	-0.572446	1.15469	-0.582241
Act57B	-0.60166	1.15435	-0.552695
Act5C	1.02646	-0.0551969	-0.971258
Act79B	-0.872415	1.09132	-0.218902
Act87E	0.399691	0.738337	-1.13803
Act88F	-0.57735	-0.57735	1.1547
Actbeta	-0.57735	1.1547	-0.57735
Actn	1.1454	-0.446027	-0.699372
ACXD	0	0	0
Acyp2	-0.970342	1.02723	-0.0568871
Ada	1.1419	-0.42248	-0.719422
Ada1-1	1.1547	-0.57735	-0.57735
Ada1-2	-1.05382	0.118144	0.93568
Ada2a	-0.48631	-0.663833	1.15014
Ada2b	0.521797	0.631175	-1.15297
Ada3	0.317612	0.802621	-1.12023
AdamTS-A	-0.249581	-0.851571	1.10115
AdamTS-B	-0.57735	-0.57735	1.1547
Adar	0.22839	0.866049	-1.09444
Adat1	0.703148	0.441639	-1.14479
Adck1	-0.288144	1.11244	-0.824292
Adck5	0.182857	0.895953	-1.07881
ADD1	-1.12214	0.325256	0.796881
AdenoK	0.614849	-1.15387	0.539021
Adf1	-0.802654	1.12022	-0.317569
Adgf-A	-0.451239	-0.694863	1.1461
Adgf-A2	0	0	0
Adh	1.14879	-0.473353	-0.675438
Adhr	1.15178	-0.504824	-0.646957
Adi1	-1.10439	0.260232	0.844158
AdipoR	0.352702	-1.12856	0.775858
Adk1	1.0757	-0.174317	-0.901381
Adk2	-0.6611	-0.489334	1.15043
Adk3	0.873053	0.217946	-1.091
AdoR	0	0	0
adp	0.832461	0.276774	-1.10924
AdSL	0.832739	-1.10912	0.276386
AdSS	-0.348403	-0.779193	1.1276
Aduk	0.634623	0.518117	-1.15274
Ady43A	0.873296	0.217582	-1.09088
Aef1	-0.474459	-0.674454	1.14891
aft	0.916119	0.150664	-1.06678
Afti	0.956684	0.0816276	-1.03831
Ag5r	0	0	0
Ag5r2	-0.57735	1.1547	-0.57735
AGBE	-0.911494	-0.158161	1.06966
AgmNAT	-0.818332	-0.296347	1.11468
ago	0.0665441	0.965066	-1.03161
AGO1	1.15226	-0.6411	-0.511161
AGO2	-0.312486	1.11893	-0.806443
AGO3	1.05984	-0.132988	-0.926852
Agpat1	0.480001	0.669505	-1.14951
Agpat2	0.993967	0.0119585	-1.00593
Agpat3	-1.03985	0.0851538	0.9547
Agpat4	0	0	0
agt	0.97602	0.046348	-1.02237
Ahcy	0.692792	0.453623	-1.14641
AhcyL1	-0.626668	1.15325	-0.526586
AIF	-1.14166	0.720693	0.420967
AIMP1	-0.836459	-0.271157	1.10762
AIMP2	-0.965143	-0.0664049	1.03155
AIMP3	-0.830112	-0.280059	1.11017
Ak6	-0.964953	-0.0667488	1.0317
Akap200	-1.13195	0.368442	0.763507
Akh	0	0	0
akirin	0.223579	-1.09287	0.869286
Akt1	1.04234	-0.0908903	-0.951452
Aladin	-1.12814	0.777304	0.35084
AlaRS	0.424052	0.7181	-1.14215
AlaRS-m	0.751399	0.383609	-1.13501
Alas	0.173059	0.902176	-1.07523
alc	0.685775	0.461653	-1.14743
Ald1	0.678156	0.470291	-1.14845
Aldh	0.0474718	0.975419	-1.02289
Aldh-III	0.299979	0.815676	-1.11565
Aldh7A1	1.09653	-0.861667	-0.234859
Alg-2	-0.474807	1.14895	-0.674144
Alg1	1.15454	-0.593711	-0.560834
Alg10	-0.980694	-0.037554	1.01825
Alg11	-1.15268	0.635402	0.517283
Alg14	-0.371644	-0.760967	1.13261
Alg2	-1.11882	0.806757	0.312063
Alg3	0.680963	0.467118	-1.14808
Alg9	0.316352	0.803562	-1.11991
Alh	-0.559139	-0.595372	1.15451
alien	-1.1515	0.650203	0.501293
ALiX	0.730701	0.40896	-1.13966
Alk	-1.08267	0.888992	0.193681
AlkB	-0.767857	-0.36293	1.13079
Alp12	0.728276	0.411884	-1.14016
alph	-0.46467	-0.683122	1.14779
alpha-Cat	0.718992	0.422992	-1.14198
alpha-Est1	0.730746	0.408906	-1.13965
alpha-Est10	-0.0736171	1.03477	-0.961157
alpha-Est3	-1.1547	0.576981	0.577719
alpha-Est4	-0.57735	-0.57735	1.1547
alpha-Est5	0	0	0
alpha-Est7	0.555466	0.598962	-1.15443
alpha-Est8	-0.45137	-0.694749	1.14612
alpha-Est9	1.01227	-0.987264	-0.0250023
alpha-Man-Ia	0.647093	0.504676	-1.15177
alpha-Man-Ib	-0.217759	1.09094	-0.873177
alpha-Man-Ic	0	0	0
alpha-Man-IIa	0.715364	0.427296	-1.14266
alpha-Man-IIb	-0.519543	-0.633289	1.15283
alpha-PheRS	-0.981214	1.01778	-0.0365688
alpha-Spec	0.867697	0.225945	-1.09364
alpha4GT1	0.0875634	0.953339	-1.0409
alphaCOP	0.713591	0.429392	-1.14298
alphaSnap	1.1307	-0.768187	-0.36251
alphaTub67C	1.14559	-0.447448	-0.698145
alphaTub84B	-0.846406	-0.257016	1.10342
alphaTub84D	-1.08522	0.884265	0.200951
alphaTub85E	-0.0719159	1.03402	-0.962101
Alr	0.928037	0.131012	-1.05905
Als2	0.82678	0.284698	-1.11148
alt	-0.480049	-0.669462	1.14951
Ama	0.575493	0.579206	-1.1547
Amacr	-0.653185	1.15122	-0.498036
amn	1.03695	-0.0785306	-0.958419
amon	0	0	0
AMPdeam	-0.466742	-0.681295	1.14804
Amph	-0.32746	-0.795216	1.12268
AMPKalpha	0.31465	0.804832	-1.11948
Amun	0.993645	-1.00624	0.0125914
amx	-0.506922	1.15194	-0.645023
ana	-0.57735	-0.57735	1.1547
ana1	1.13722	-0.741974	-0.395241
ana2	0.00720899	0.996376	-1.00359
ana3	-0.35857	1.12985	-0.771278
Ance	-0.661626	-0.488753	1.15038
Ance-2	-0.59468	-0.559846	1.15453
Ance-3	0.597437	0.557027	-1.15446
Ance-4	-0.57735	-0.57735	1.1547
Ance-5	0.579068	0.575631	-1.1547
anchor	0.474363	0.674539	-1.1489
angel	-0.96081	-0.0742413	1.03505
Ank	0.849535	0.25252	-1.10205
Ank2	-0.57735	-0.57735	1.1547
Ankle2	0.403423	0.735271	-1.13869
anne	-1.04459	0.94847	0.0961185
anox	0.187301	-1.08041	0.893106
Ant2	-0.655514	-0.495485	1.151
antdh	-0.57735	1.1547	-0.57735
Antp	-0.57735	-0.57735	1.1547
antr	0.703259	0.441509	-1.14477
AnxB10	0.791366	0.332537	-1.1239
AnxB11	-1.03855	0.0821711	0.956379
AnxB9	-0.5647	-0.589909	1.15461
aop	-0.665852	-0.484069	1.14992
aos	-1.07902	0.895574	0.18345
Aos1	-0.845407	-0.258446	1.10385
AOX1	0.59124	0.563348	-1.15459
AOX3	0.823161	0.289707	-1.11287
ap	-0.57735	-0.57735	1.1547
AP-1-2beta	0.548334	0.605888	-1.15422
AP-1gamma	0.265936	0.84015	-1.10609
AP-1mu	0.798788	0.322723	-1.12151
AP-1sigma	-0.141008	-0.922012	1.06302
AP-2alpha	0.113577	0.938362	-1.05194
AP-2mu	0.418384	0.722858	-1.14124
AP-2sigma	0.389468	0.746667	-1.13614
Apc	0.814175	0.302024	-1.1162
APC10	1.08692	-0.205887	-0.881032
Apc2	0.880902	0.206085	-1.08699
APC4	-0.715441	1.14265	-0.427205
ApepP	0.148818	0.917251	-1.06607
Apf	-1.11481	0.29683	0.81798
aph-1	-0.749104	-0.386455	1.13556
aPKC	-0.559011	1.15451	-0.595498
Apl	0.802502	0.317771	-1.12027
Aplip1	-1.15198	0.507424	0.644559
apolpp	0.867376	0.226421	-1.0938
Apoltp	1.04546	-0.0981696	-0.947295
app	0.0844966	-1.03957	0.955071
APP-BP1	-0.859929	1.09734	-0.237413
Appl	0	0	0
Aprt	-0.594316	-0.560217	1.15453
Aps	-0.570079	-0.584591	1.15467
apt	-0.768131	-0.362581	1.13071
aqz	-0.326143	-0.796211	1.12235
ara	0	0	0
aralar1	0.348459	0.77915	-1.12761
Arc1	-0.88368	-0.201847	1.08553
Arc2	-0.566721	-0.587915	1.15464
Arc42	-0.075444	1.03559	-0.960141
Archease	-0.952761	1.04135	-0.0885841
Arf102F	-0.84138	-0.264189	1.10557
Arf51F	0.73046	-1.13971	0.409251
Arf79F	0.576453	-1.1547	0.578247
ArfGAP1	0.772334	0.357221	-1.12955
ArfGAP3	-1.05244	0.114774	0.937661
Arfip	-0.646379	-0.505452	1.15183
Arfrp1	-1.09828	0.240389	0.857895
arg	0.775869	0.352687	-1.12856
Argk	1.11085	-0.282458	-0.828391
Argl	1.02286	-0.0473961	-0.975459
ArgRS	0.391527	0.744997	-1.13652
ArgRS-m	1.05664	-0.12503	-0.931606
ari-1	0.0950348	-1.04412	0.94909
ari-2	0.0637647	0.966592	-1.03036
Arl1	0.90171	-1.07551	0.173797
Arl2	-1.14681	0.690113	0.456697
Arl4	-1.00627	0.0126578	0.993611
Arl5	-0.703079	-0.44172	1.1448
Arl6	-0.616447	1.1538	-0.53735
Arl6IP1	1.03088	-0.965953	-0.064929
Arl8	0.608916	0.545198	-1.15411
arm	0.845741	0.257968	-1.10371
armi	0.207313	0.880094	-1.08741
Arp1	1.09042	-0.21621	-0.874209
Arp10	0.808151	0.310186	-1.11834
Arp2	0.261103	0.843548	-1.10465
Arp3	0.279582	-1.11004	0.830454
Arp5	-1.05658	0.931684	0.124899
Arp53D	0	0	0
Arp6	0.892895	-1.08052	0.187629
Arp8	-1.07988	0.894059	0.185816
Arpc1	1.08573	-0.202444	-0.883289
Arpc2	0.0995234	-1.04604	0.946517
Arpc3A	-1.15115	0.497202	0.653947
Arpc3B	-1.13344	0.375707	0.757733
Arpc4	-1.05447	0.119711	0.934756
Arpc5	0.402173	-1.13847	0.7363
arr	-0.314557	1.11946	-0.804902
Ars2	-0.824052	-0.288476	1.11253
Art1	-1.15226	0.641152	0.511105
Art3	-0.764619	-0.367035	1.13165
Art4	0.610708	0.543337	-1.15405
Art7	-0.974662	-0.0488839	1.02355
Art8	-0.521433	-0.631517	1.15295
Arts	0.243503	0.855761	-1.09926
aru	-0.874221	1.09041	-0.216191
Arv1	0.789559	-1.12447	0.33491
arx	-0.185317	-0.894379	1.0797
Asap	0.749566	0.385884	-1.13545
Asator	0.570937	0.58374	-1.15468
Asciz	1.15376	-0.536506	-0.617253
asf1	0.0778083	0.958823	-1.03663
ash1	0.000130307	0.999935	-1.00007
ash2	1.09656	-0.234973	-0.86159
Ask1	0.767529	0.363346	-1.13088
asl	-1.04337	0.95009	0.093283
AsnRS	0.63801	0.514486	-1.1525
AsnRS-m	-1.0969	0.860869	0.236033
AsnS	0.617965	0.53576	-1.15372
asp	0.529429	0.623981	-1.15341
Asph	-0.57735	-0.57735	1.1547
ASPP	-0.57735	-0.57735	1.1547
AspRS	0.277901	0.831657	-1.10956
AspRS-m	0.844495	0.25975	-1.10425
asrij	-0.892966	-0.18752	1.08049
asRNA:ASTR	-0.863727	1.09555	-0.231824
asRNA:CR17025	0	0	0
asRNA:CR31144	-0.523549	-0.629529	1.15308
asRNA:CR31514	0.560706	0.593836	-1.15454
asRNA:CR31912	-0.57735	-0.57735	1.1547
asRNA:CR32252	-0.57735	-0.57735	1.1547
asRNA:CR33945	0	0	0
asRNA:CR42254	-0.990275	1.00945	-0.019174
asRNA:CR42547	0.545523	-1.15413	0.608603
asRNA:CR42738	-0.57735	-0.57735	1.1547
asRNA:CR42871	0.390392	0.745918	-1.13631
asRNA:CR43152	-0.57735	1.1547	-0.57735
asRNA:CR43159	-0.57735	-0.57735	1.1547
asRNA:CR43257	-0.459931	-0.687285	1.14722
asRNA:CR43425	0	0	0
asRNA:CR43426	0	0	0
asRNA:CR43460	-0.57735	-0.57735	1.1547
asRNA:CR43463	0	0	0
asRNA:CR43465	-0.0306153	1.01496	-0.984341
asRNA:CR43466	0	0	0
asRNA:CR43468	-1.06274	0.922443	0.140297
asRNA:CR43474	-0.57735	-0.57735	1.1547
asRNA:CR43476	0	0	0
asRNA:CR43480	-0.57735	-0.57735	1.1547
asRNA:CR43481	-0.57735	1.1547	-0.57735
asRNA:CR43629	-0.793924	-0.329168	1.12309
asRNA:CR43637	1.1547	-0.57735	-0.57735
asRNA:CR43683	-0.835235	-0.272879	1.10811
asRNA:CR43723	0.589687	0.564925	-1.15461
asRNA:CR43730	-0.57735	1.1547	-0.57735
asRNA:CR43767	0	0	0
asRNA:CR43786	0	0	0
asRNA:CR43787	0.221395	0.870749	-1.09214
asRNA:CR43809	0.922273	0.140577	-1.06285
asRNA:CR43812	1.10744	-0.270562	-0.83688
asRNA:CR43824	1.08368	-0.887129	-0.196554
asRNA:CR43833	0.500878	0.650583	-1.15146
asRNA:CR43864	0.600166	0.55423	-1.1544
asRNA:CR43868	0.662595	0.487681	-1.15028
asRNA:CR43875	1.03958	-0.0845235	-0.955056
asRNA:CR43889	-0.57735	-0.57735	1.1547
asRNA:CR43906	-1.04642	0.946004	0.100415
asRNA:CR43916	1.0678	-0.153294	-0.914502
asRNA:CR43933	-0.57735	1.1547	-0.57735
asRNA:CR43944	-0.12338	1.05597	-0.932585
asRNA:CR43957	-0.596681	1.15448	-0.557801
asRNA:CR43964	0.723244	0.417922	-1.14117
asRNA:CR43981	-0.57735	-0.57735	1.1547
asRNA:CR44019	-0.57735	-0.57735	1.1547
asRNA:CR44021	0.68933	-1.14692	0.457594
asRNA:CR44029	-1.15451	0.559001	0.595507
asRNA:CR44030	-0.797099	-0.324966	1.12207
asRNA:CR44031	0.888869	0.193871	-1.08274
asRNA:CR44045	0	0	0
asRNA:CR44046	-0.933471	1.05536	-0.121885
asRNA:CR44047	-1.0981	0.23979	0.858305
asRNA:CR44049	-0.836051	1.10778	-0.27173
asRNA:CR44053	0.340076	0.785609	-1.12569
asRNA:CR44054	1.1547	-0.57735	-0.57735
asRNA:CR44064	1.07841	-0.181756	-0.896656
asRNA:CR44065	1.15312	-0.628806	-0.524318
asRNA:CR44067	0	0	0
asRNA:CR44069	0	0	0
asRNA:CR44093	-0.11274	-0.938852	1.05159
asRNA:CR44095	0.827685	0.283441	-1.11113
asRNA:CR44114	0.594938	-1.15452	0.559582
asRNA:CR44116	-0.57735	-0.57735	1.1547
asRNA:CR44119	0.697662	-1.14567	0.448007
asRNA:CR44124	-1.11464	0.29621	0.818433
asRNA:CR44134	1.13606	-0.389073	-0.746987
asRNA:CR44137	0	0	0
asRNA:CR44147	1.14274	-0.714908	-0.427835
asRNA:CR44160	-0.57735	-0.57735	1.1547
asRNA:CR44168	1.00413	-0.0083055	-0.995821
asRNA:CR44169	0	0	0
asRNA:CR44176	0	0	0
asRNA:CR44179	1.08284	-0.194155	-0.888685
asRNA:CR44182	0	0	0
asRNA:CR44201	-0.57735	-0.57735	1.1547
asRNA:CR44224	1.15174	-0.50425	-0.647485
asRNA:CR44228	1.03698	-0.0786095	-0.958375
asRNA:CR44266	1.12292	-0.328479	-0.794445
asRNA:CR44267	1.02599	-0.0541909	-0.971803
asRNA:CR44291	0.290607	0.822509	-1.11312
asRNA:CR44321	-0.57735	-0.57735	1.1547
asRNA:CR44340	-0.259316	1.10412	-0.844799
asRNA:CR44367	0.99379	0.0123065	-1.0061
asRNA:CR44368	1.15122	-0.497978	-0.653238
asRNA:CR44370	0	0	0
asRNA:CR44372	-0.57735	-0.57735	1.1547
asRNA:CR44374	0	0	0
asRNA:CR44375	-0.57735	1.1547	-0.57735
asRNA:CR44381	-0.970066	1.02746	-0.0573958
asRNA:CR44382	-0.57735	-0.57735	1.1547
asRNA:CR44386	1.10207	-0.849509	-0.252557
asRNA:CR44390	-0.871439	1.0918	-0.220364
asRNA:CR44416	0	0	0
asRNA:CR44429	-0.148949	-0.917171	1.06612
asRNA:CR44431	-0.370436	1.13236	-0.761927
asRNA:CR44512	-0.57735	-0.57735	1.1547
asRNA:CR44599	-0.852064	1.10093	-0.248868
asRNA:CR44600	-0.57735	-0.57735	1.1547
asRNA:CR44690	-0.945274	1.04696	-0.101683
asRNA:CR44703	0	0	0
asRNA:CR44704	-0.946766	1.04586	-0.0990906
asRNA:CR44724	1.1547	-0.57735	-0.57735
asRNA:CR44793	-0.948129	1.04484	-0.0967152
asRNA:CR44806	-0.57735	1.1547	-0.57735
asRNA:CR44807	0.404647	0.734263	-1.13891
asRNA:CR44841	0.366515	0.765031	-1.13155
asRNA:CR44843	-0.57735	-0.57735	1.1547
asRNA:CR44849	1.14285	-0.714331	-0.428518
asRNA:CR44872	0.595074	0.559443	-1.15452
asRNA:CR44891	0	0	0
asRNA:CR44892	-0.726742	-0.413729	1.14047
asRNA:CR44910	-0.57735	-0.57735	1.1547
asRNA:CR44911	-0.57735	-0.57735	1.1547
asRNA:CR44959	1.09854	-0.857342	-0.241197
asRNA:CR44960	0.998261	-1.00173	0.00346905
asRNA:CR44961	-1.02505	0.0521482	0.972906
asRNA:CR44962	1.13611	-0.389343	-0.746768
asRNA:CR44968	-0.57735	-0.57735	1.1547
asRNA:CR44969	0.965894	0.0650367	-1.03093
asRNA:CR44972	0	0	0
asRNA:CR44976	-0.733104	-0.406053	1.13916
asRNA:CR44981	-0.57735	1.1547	-0.57735
asRNA:CR44982	-0.57735	1.1547	-0.57735
asRNA:CR44987	1.12578	-0.340481	-0.785299
asRNA:CR44989	1.1547	-0.57735	-0.57735
asRNA:CR44992	0	0	0
asRNA:CR44996	0	0	0
asRNA:CR44998	-0.57735	1.1547	-0.57735
asRNA:CR45000	-0.634778	-0.517951	1.15273
asRNA:CR45007	0.707745	0.436269	-1.14401
asRNA:CR45009	-1.08642	0.204447	0.881977
asRNA:CR45026	-0.57735	1.1547	-0.57735
asRNA:CR45028	0.567923	0.586727	-1.15465
asRNA:CR45044	1.00895	-0.0181535	-0.9908
asRNA:CR45053	0.486741	0.663444	-1.15018
asRNA:CR45108	-0.57735	-0.57735	1.1547
asRNA:CR45124	-0.964236	-0.0680512	1.03229
asRNA:CR45126	1.01451	-0.0296733	-0.984833
asRNA:CR45129	0	0	0
asRNA:CR45131	-0.57735	1.1547	-0.57735
asRNA:CR45132	1.1547	-0.57735	-0.57735
asRNA:CR45135	0	0	0
asRNA:CR45136	-0.57735	-0.57735	1.1547
asRNA:CR45139	0.204437	0.881984	-1.08642
asRNA:CR45140	0.496987	0.654143	-1.15113
asRNA:CR45141	0.935372	0.118667	-1.05404
asRNA:CR45142	0.896354	0.18223	-1.07858
asRNA:CR45145	0.926429	0.133691	-1.06012
asRNA:CR45149	1.1547	-0.57735	-0.57735
asRNA:CR45160	0.218385	0.87276	-1.09115
asRNA:CR45163	1.1547	-0.57735	-0.57735
asRNA:CR45164	0.880149	0.20723	-1.08738
asRNA:CR45171	1.14426	-0.706279	-0.437985
asRNA:CR45175	-0.937262	1.05272	-0.115454
asRNA:CR45182	1.1547	-0.57735	-0.57735
asRNA:CR45185	-0.57735	1.1547	-0.57735
asRNA:CR45189	0	0	0
asRNA:CR45190	0.882298	0.203958	-1.08626
asRNA:CR45195	1.0651	-0.14633	-0.918773
asRNA:CR45198	0.605997	0.548222	-1.15422
asRNA:CR45202	-0.57735	-0.57735	1.1547
asRNA:CR45208	1.1547	-0.57735	-0.57735
asRNA:CR45210	0	0	0
asRNA:CR45214	1.08759	-0.207838	-0.879749
asRNA:CR45264	0.340815	0.785042	-1.12586
asRNA:CR45272	-0.57735	-0.57735	1.1547
asRNA:CR45275	0.787691	0.337357	-1.12505
asRNA:CR45281	-0.57735	1.1547	-0.57735
asRNA:CR45326	0	0	0
asRNA:CR45350	0.972915	0.052131	-1.02505
asRNA:CR45366	-0.57735	-0.57735	1.1547
asRNA:CR45367	0.680611	0.467516	-1.14813
asRNA:CR45396	-0.686522	-0.460801	1.14732
asRNA:CR45397	1.09908	-0.242932	-0.856153
asRNA:CR45445	-0.57735	-0.57735	1.1547
asRNA:CR45466	-0.255456	-0.847493	1.10295
asRNA:CR45467	-1.15283	0.519575	0.633259
asRNA:CR45468	-0.57735	-0.57735	1.1547
asRNA:CR45479	-0.57735	-0.57735	1.1547
asRNA:CR45485	0.844551	0.259671	-1.10422
asRNA:CR45501	-0.928776	-0.129777	1.05855
asRNA:CR45518	-0.57735	-0.57735	1.1547
asRNA:CR45520	0.885773	0.198639	-1.08441
asRNA:CR45528	-0.902872	-0.171954	1.07483
asRNA:CR45549	-1.1373	0.395689	0.741609
asRNA:CR45600	1.11254	-0.824027	-0.28851
asRNA:CR45604	0.904945	0.168661	-1.07361
asRNA:CR45612	-0.57735	-0.57735	1.1547
asRNA:CR45620	1.1483	-0.679274	-0.469028
asRNA:CR45682	-0.57735	-0.57735	1.1547
asRNA:CR45683	1.15382	-0.616019	-0.537799
asRNA:CR45686	1.0761	-0.175415	-0.900686
asRNA:CR45713	0	0	0
asRNA:CR45714	-0.828816	-0.281866	1.11068
asRNA:CR45778	0.698403	0.44715	-1.14555
asRNA:CR45789	1.06823	-0.154434	-0.913799
asRNA:CR45798	1.02939	-0.0616313	-0.967759
asRNA:CR45800	0	0	0
asRNA:CR45804	-0.827029	1.11138	-0.284352
asRNA:CR45806	0.695113	0.45095	-1.14606
asRNA:CR45813	-0.57735	-0.57735	1.1547
asRNA:CR45814	1.03843	-0.0819022	-0.95653
asRNA:CR45815	-1.14875	0.473016	0.675738
asRNA:CR45818	1.03459	-0.0732139	-0.961381
asRNA:CR45822	-0.57735	-0.57735	1.1547
asRNA:CR45827	0	0	0
asRNA:CR45831	0	0	0
asRNA:CR45835	-0.57735	-0.57735	1.1547
asRNA:CR45865	0.948802	-1.04434	0.0955387
asRNA:CR45870	-1.12557	0.785996	0.339571
asRNA:CR45871	0	0	0
asRNA:CR45873	0.992334	0.01516	-1.00749
asRNA:CR45874	0.706746	-1.14418	0.437439
asRNA:CR45875	0	0	0
asRNA:CR45889	-0.57735	-0.57735	1.1547
asRNA:CR45891	-0.57735	-0.57735	1.1547
asRNA:CR45892	0	0	0
asRNA:CR45895	1.1424	-0.425639	-0.716763
asRNA:CR45896	0	0	0
asRNA:CR45907	-0.753554	1.13448	-0.380928
asRNA:CR45908	-0.57735	-0.57735	1.1547
asRNA:CR45912	0	0	0
asRNA:CR45925	-0.0147483	1.00729	-0.992544
asRNA:CR45926	1.00718	-0.0145223	-0.99266
asRNA:CR45928	0.715189	0.427503	-1.14269
asRNA:CR45929	1.04044	-0.0864972	-0.953942
asRNA:CR45943	0.813015	-1.11662	0.303602
asRNA:CR45951	1.1547	-0.57735	-0.57735
asRNA:CR45952	0	0	0
asRNA:CR45968	1.14308	-0.43004	-0.713042
asRNA:CR45969	-0.57735	-0.57735	1.1547
asRNA:CR45970	-0.57735	-0.57735	1.1547
asRNA:CR45999	1.07011	-0.159369	-0.910745
asRNA:CR46018	0.515557	0.637012	-1.15257
asRNA:CR46020	0	0	0
asRNA:CR46029	-0.57735	-0.57735	1.1547
asRNA:CR46033	0	0	0
asRNA:CR46044	-0.57735	-0.57735	1.1547
asRNA:CR46048	0	0	0
asRNA:CR46050	-0.57735	-0.57735	1.1547
asRNA:CR46055	-0.57735	-0.57735	1.1547
asRNA:CR46067	0.831945	0.277497	-1.10944
asRNA:CR46081	0	0	0
asRNA:CR46089	1.05558	-0.93314	-0.122444
asRNA:CR46091	1.08958	-0.213726	-0.875858
asRNA:CR46093	-0.603531	-0.550767	1.1543
asRNA:CR46096	1.1547	-0.57735	-0.57735
asRNA:CR46097	-0.145988	1.06497	-0.918982
asRNA:CR46099	-1.13927	0.406699	0.732571
asRNA:CR46104	1.03884	-0.0828253	-0.956012
asRNA:CR46105	0	0	0
asRNA:CR46109	-0.57735	-0.57735	1.1547
asRNA:CR46133	0.896639	0.181782	-1.07842
asRNA:CR46134	0.249099	0.851904	-1.101
asRNA:CR46135	1.13271	-0.372107	-0.760599
asRNA:CR46137	-0.57735	1.1547	-0.57735
asRNA:CR46138	0.101806	0.945203	-1.04701
asRNA:CR46140	0	0	0
asRNA:CR46145	1.1547	-0.57735	-0.57735
asRNA:CR46255	1.1547	-0.57735	-0.57735
asRNA:CR46262	1.1547	-0.57735	-0.57735
asRNA:CR46354	0.0808212	0.957137	-1.03796
ast	0.508982	0.643119	-1.1521
AstA	0.284288	0.827075	-1.11136
AstA-R1	1.1547	-0.57735	-0.57735
asun	1.15434	-0.552045	-0.602291
Asx	1.09295	-0.223846	-0.869107
Atac1	-1.06661	0.150206	0.9164
Atac2	-0.807762	1.11847	-0.31071
Atac3	-1.13276	0.760398	0.37236
ATbp	-0.453467	1.14639	-0.692927
Ate1	0.540445	0.613485	-1.15393
Atet	0.698382	0.447174	-1.14556
Atf-2	0.295838	0.818704	-1.11454
Atf3	1.14006	-0.728776	-0.411282
Atf6	-0.635849	1.15265	-0.516804
Atg1	0.846939	0.256252	-1.10319
Atg10	-0.597856	-0.556598	1.15445
Atg101	0.839521	0.266828	-1.10635
Atg12	-0.0858992	1.04018	-0.95428
Atg13	0.679151	0.469168	-1.14832
Atg14	0.784426	0.341617	-1.12604
Atg16	0.416909	0.724091	-1.141
Atg17	-0.0653107	-0.965744	1.03105
Atg18a	1.0997	-0.244895	-0.854803
Atg18b	1.13359	-0.376474	-0.75712
Atg2	-0.120827	1.05492	-0.934097
Atg3	0.878748	-1.0881	0.209357
Atg4a	-1.14911	0.476237	0.672869
Atg4b	0.687434	0.45976	-1.14719
Atg5	0.595474	0.559034	-1.15451
Atg6	-0.324665	1.12199	-0.797326
Atg7	-1.01095	0.988678	0.0222718
Atg8a	-0.563527	-0.591064	1.15459
Atg8b	-0.57735	1.1547	-0.57735
Atg9	0.520453	0.632436	-1.15289
atilla	-0.832937	-0.276108	1.10904
atk	-0.57735	-0.57735	1.1547
atl	0.750532	0.384685	-1.13522
atms	-1.04669	0.945642	0.101044
Atox1	0.494175	0.656706	-1.15088
ATP6AP2	0.335858	0.788837	-1.12469
ATP7	0.820306	0.29364	-1.11395
ATP8A	1.12856	-0.77584	-0.352725
ATP8B	0.365453	0.765869	-1.13132
Atpalpha	0.960781	0.0742949	-1.03508
ATPCL	1.02394	-0.0497314	-0.974206
ATPsynB	0.310305	0.808062	-1.11837
ATPsynbeta	0.534439	0.619224	-1.15366
ATPsynbetaL	-0.57735	1.1547	-0.57735
ATPsynC	-0.855079	-0.244494	1.09957
ATPsynCF6	0.532758	0.620823	-1.15358
ATPsynCF6L	-0.57735	1.1547	-0.57735
ATPsynD	0.541393	0.612576	-1.15397
ATPsyndelta	0.572743	0.581946	-1.15469
ATPsynE	-0.730346	-0.409389	1.13973
ATPsynepsilonL	-1.14506	0.701491	0.443567
ATPsynF	-0.958199	-0.0789249	1.03712
ATPsynG	0.398669	0.739174	-1.13784
ATPsyngamma	0.55394	0.600448	-1.15439
ATPsynGL	0	0	0
ATPsynO	0.346717	0.780497	-1.12721
AttA	-0.57735	-0.57735	1.1547
AttB	-0.386151	-0.74935	1.1355
AttC	0	0	0
AttD	1.10293	-0.847545	-0.255382
Atu	0.890359	0.191567	-1.08193
Atx-1	-0.694799	1.14611	-0.451312
Atx2	0.516302	0.636318	-1.15262
Atxn7	0.868433	0.224849	-1.09328
aub	0.133366	0.926624	-1.05999
aurA	-1.02723	0.970337	0.0568963
aurB	-1.06315	0.141332	0.921815
aust	0	0	0
aux	1.08171	-0.190951	-0.890756
ave	-0.935784	1.05375	-0.117967
Aven	1.03873	-0.0825743	-0.956153
awd	-0.876018	-0.213485	1.0895
Awh	0	0	0
axed	0.490033	0.660467	-1.1505
Axn	1.01894	-0.039017	-0.97992
Axs	-1.15281	0.633605	0.519205
Axud1	-1.1546	0.564178	0.590423
az2	-0.996327	1.00363	-0.00730626
b	0.280734	0.829629	-1.11036
B-H2	0	0	0
B4	-0.65456	-0.49653	1.15109
B52	-0.871478	-0.220305	1.09178
B9d1	0	0	0
bab1	1.07165	-0.163431	-0.908218
bab2	0	0	0
babo	-0.984438	-0.03043	1.01487
babos	0	0	0
Bacc	-0.639506	-0.512878	1.15238
baf	-1.09145	0.21929	0.872156
bai	-1.1505	0.660456	0.490046
Balat	-0.57735	-0.57735	1.1547
Baldspot	0.142026	-1.06342	0.921394
ball	-0.756656	-0.377055	1.13371
bam	-0.0132679	1.00657	-0.9933
Bap111	0.358086	0.771658	-1.12974
Bap170	0.548452	0.605774	-1.15423
Bap55	-1.15329	0.527223	0.626067
Bap60	0.993278	0.0133118	-1.00659
barc	-0.932472	-0.123571	1.05604
bark	-0.57735	-0.57735	1.1547
barr	-1.06581	0.14814	0.917666
baz	0.960399	0.0749817	-1.03538
bb8	-0.57735	1.1547	-0.57735
bbc	0.175477	-1.07612	0.900647
bbg	-0.585032	-0.569635	1.15467
BBIP1	1.03759	-0.0799761	-0.95761
BBS8	-0.57735	-0.57735	1.1547
bbx	1.06945	-0.157624	-0.911827
bc10	1.05521	-0.121516	-0.933689
BCAS2	-0.92472	-0.13653	1.06125
bchs	0.959022	0.0774516	-1.03647
BCL7-like	0.254443	0.848198	-1.10264
bcn92	-0.729852	-0.409985	1.13984
Bdbt	-1.09608	0.862609	0.233474
bdg	0.69711	0.448646	-1.14576
bdl	-0.57735	1.1547	-0.57735
Bdp1	0.389671	-1.13617	0.746502
be	1.09496	-0.229999	-0.864962
BEAF-32	-0.450923	-0.695137	1.14606
beag	-0.162441	-0.908835	1.07128
beat-Ib	0	0	0
beat-Ic	0	0	0
beat-IIIc	-0.57735	-0.57735	1.1547
beat-VI	0	0	0
beat-VII	0	0	0
beg	-0.447682	1.14562	-0.697943
bel	-1.10373	0.258051	0.845683
Bem46	0.636446	0.516164	-1.15261
ben	0.77341	0.355843	-1.12925
Best1	-0.339245	-0.786246	1.12549
Best2	0	0	0
Bet1	-0.652861	1.15125	-0.49839
Bet3	0.332925	0.791072	-1.124
Bet5	-0.472389	-0.676294	1.14868
beta-Man	0.369906	0.762347	-1.13225
beta-PheRS	-1.01271	0.986782	0.0259325
beta-Spec	0.550991	0.603314	-1.15431
beta'COP	0.737975	0.400131	-1.13811
beta3GalTII	0.0830974	-1.03896	0.955859
beta4GalNAcTA	-0.368275	1.13191	-0.763639
beta4GalNAcTB	0.0837425	0.955495	-1.03924
beta4GalT7	0.239599	0.858436	-1.09803
betaCOP	0.325865	0.796421	-1.12229
betaggt-I	-0.76504	-0.366502	1.13154
betaggt-II	0.68228	0.465625	-1.14791
betaGlu	-0.432748	1.14349	-0.710744
betaTub56D	-1.04395	0.094638	0.949317
betaTub60D	-0.842032	-0.263262	1.10529
betaTub85D	-1.09669	0.235379	0.861314
betaTub97EF	1.03185	-0.964774	-0.0670745
Bgb	0.838254	0.268622	-1.10688
bgcn	0	0	0
bgm	-0.504996	-0.646798	1.15179
BHD	-0.421887	1.14181	-0.719921
bi	-0.57735	-0.57735	1.1547
BI-1	1.15436	-0.601513	-0.552846
bib	1.1547	-0.57735	-0.57735
bic	-0.0924902	-0.950542	1.04303
BicD	-0.818398	-0.296258	1.11466
bif	-0.431873	-0.711487	1.14336
BigH1	-0.841372	1.10557	-0.2642
bigmax	-1.14966	0.481461	0.668195
Bin1	-1.14826	0.468657	0.679602
bin3	-0.483522	-0.666344	1.14987
bip1	-0.150451	-0.91625	1.0667
bip2	-0.567908	-0.586741	1.15465
Bka	-0.957268	-0.0805881	1.03786
blanks	-0.57735	-0.57735	1.1547
Blimp-1	0	0	0
Blm	-0.791227	1.12395	-0.332721
Blos1	-1.10605	0.265815	0.840235
Blos2	-0.510466	1.15221	-0.641745
Blos3	-0.520866	1.15291	-0.632049
Blos4	-0.836939	1.10742	-0.270478
blot	-0.57735	-0.57735	1.1547
blow	0.751456	0.383538	-1.13499
blp	-0.826204	-0.285496	1.1117
blw	-0.158336	-0.911386	1.06972
bma	1.0914	-0.219137	-0.872258
Bmcp	-0.953301	-0.0876307	1.04093
bmm	-0.405954	-0.733186	1.13914
bnb	-0.57735	-0.57735	1.1547
bnl	0.970076	0.0573774	-1.02745
boca	-1.15461	0.589595	0.565018
bocks	0.344411	0.782277	-1.12669
BOD1	1.07081	-0.161209	-0.909602
boi	-1.0339	0.0716556	0.962245
bol	-1.14945	0.670001	0.479447
Bom1	-0.57735	1.1547	-0.57735
Bom3	-0.301873	1.11616	-0.814286
bon	0.899129	0.177871	-1.077
bond	-0.57735	-0.57735	1.1547
bonsai	-0.880269	-0.207047	1.08732
bor	-0.290864	-0.822323	1.11319
bora	-1.12418	0.333702	0.79048
BORCS5	0.839344	0.267079	-1.10642
BORCS6	-0.19676	1.08376	-0.886995
BORCS7	0.353342	-1.1287	0.77536
borr	-0.806549	1.11889	-0.312343
botv	0.914892	0.15266	-1.06755
bou	1.14732	-0.460788	-0.686533
bowl	-0.57735	-0.57735	1.1547
BoYb	0.611705	0.542301	-1.15401
br	0.796213	0.326141	-1.12235
Br140	0.816931	0.298264	-1.1152
brat	-0.841579	-0.263907	1.10549
Brca2	-0.0225353	1.01108	-0.988542
Brd	0	0	0
Brd8	0.836263	0.271432	-1.1077
Bre1	-0.605797	1.15423	-0.548428
Brf	0.525617	0.627582	-1.1532
brk	-0.979468	-0.0398718	1.01934
brm	-0.319575	1.12073	-0.801151
Brms1	1.14917	-0.672322	-0.47685
brn	0.961186	-1.03475	0.0735643
brp	-1.09999	0.854159	0.245831
bru1	-0.57735	1.1547	-0.57735
bru2	0	0	0
bru3	0.770391	0.359703	-1.13009
Bruce	0.261177	0.843495	-1.10467
brun	0.968988	0.0593772	-1.02837
brv3	1.1547	-0.57735	-0.57735
BRWD3	0.220488	0.871356	-1.09184
brwl	-0.764844	1.1316	-0.366751
bs	0.999732	0.000536238	-1.00027
bsf	-1.15449	0.558038	0.596449
Bsg	0.542781	0.611243	-1.15402
Bsg25D	-0.821823	1.11338	-0.291553
bsk	1.09828	-0.240373	-0.857906
bt	0.773766	0.355387	-1.12915
BTBD9	-0.64935	1.15157	-0.502222
BtbVII	0.698949	0.446517	-1.14547
btd	-0.57735	-0.57735	1.1547
BthD	-0.674335	-0.474592	1.14893
Btk29A	-0.219967	1.09167	-0.871704
btl	0.845672	0.258067	-1.10374
btsz	0.459795	0.687404	-1.1472
btz	0.86433	-1.09526	0.230934
Bub1	0.834883	0.273376	-1.10826
Bub3	-1.12878	0.353676	0.7751
BubR1	0.34151	0.784509	-1.12602
bug	1.03018	-0.0633768	-0.966804
Bug22	-0.833988	-0.274633	1.10862
BuGZ	0.782257	0.344436	-1.12669
bun	0.925782	-1.06055	0.134767
bur	-0.745623	-0.390756	1.13638
bves	-0.339132	1.12546	-0.786333
bw	0.977588	0.043411	-1.021
bwa	0.15975	0.910509	-1.07026
Bx	0.102108	0.945029	-1.04714
Bx42	0.578448	0.576252	-1.1547
by	1.15106	-0.496228	-0.654836
bys	0.554805	0.599605	-1.15441
c(2)M	1.11124	-0.827387	-0.283855
c(3)G	0.0909116	-1.04235	0.95144
c11.1	0.11355	0.938378	-1.05193
c12.1	-1.05435	0.11942	0.934928
c12.2	0.790401	-1.12421	0.333805
C1GalTA	0.698683	0.446825	-1.14551
C3G	-0.00390478	1.00195	-0.998042
ca	0.96642	0.0640775	-1.0305
Ca-alpha1D	0	0	0
Ca-alpha1T	1.14978	-0.667066	-0.482719
Ca-Ma2d	-0.57735	-0.57735	1.1547
CaBP1	1.13924	-0.406535	-0.732706
cac	-0.913316	1.06853	-0.155217
cact	0.0143524	-1.0071	0.992747
cactin	-1.11374	0.292873	0.820864
Cad86C	-0.583559	-0.57112	1.15468
Cad87A	-0.284409	1.1114	-0.826988
Cad96Ca	0	0	0
Cad99C	-0.57735	-0.57735	1.1547
CadN	-0.57735	-0.57735	1.1547
CadN2	0	0	0
Cadps	0.869733	0.222913	-1.09265
Caf1-105	-0.131455	1.05923	-0.927771
Caf1-180	-1.11216	0.825023	0.287133
Caf1-55	0.468369	0.679858	-1.14823
cag	-1.15421	0.606291	0.547917
CAH1	0	0	0
CAH13	-0.57735	1.1547	-0.57735
CAH2	1.14205	-0.423409	-0.718641
CAH3	0.562493	0.592081	-1.15457
CAH7	0	0	0
CAHbeta	-0.234637	1.09646	-0.861818
cal1	0.0681137	-1.03232	0.964202
CalpA	-0.033881	1.01651	-0.982629
CalpB	0.504338	0.647404	-1.15174
CalpC	0.991868	-1.00794	0.0160695
Calr	0.494487	0.656422	-1.15091
Cals	0.498913	0.652383	-1.1513
Calx	-0.57735	1.1547	-0.57735
calypso	1.15192	-0.645312	-0.506609
Cam	0.409572	-1.13977	0.730194
CaMKI	-1.14783	0.46496	0.682866
CaMKII	-0.899365	-0.1775	1.07686
Camp	0.405489	-1.13906	0.73357
Camta	0.553644	0.600737	-1.15438
can	0	0	0
cana	-0.00189543	-0.999051	1.00095
CanA-14F	1.08692	-0.205899	-0.881024
CanB	0	0	0
CanB2	0.828535	0.282258	-1.11079
Cand1	-1.14856	0.471304	0.677258
CAP	-0.583846	-0.57083	1.15468
Cap-D2	-0.220223	1.09176	-0.871533
Cap-D3	-0.0133137	1.00659	-0.993277
Cap-G	0.667181	0.482591	-1.14977
Cap-H2	0.47064	0.677847	-1.14849
Caper	-1.06889	0.912738	0.156152
Capr	-0.641503	1.15223	-0.510727
caps	1.14216	-0.424102	-0.718058
capt	0.338542	0.786784	-1.12533
capu	-0.815037	-0.30085	1.11589
car	-0.25971	1.10423	-0.844523
CARPB	-0.788197	1.12489	-0.336694
CarT	-0.57735	1.1547	-0.57735
CASK	0.979693	0.0394471	-1.01914
casp	-1.10438	0.844185	0.260193
cass	0.480675	0.668901	-1.14958
Cat	0.79551	0.327072	-1.12258
cathD	0.157497	0.911906	-1.0694
Catsup	-0.320143	1.12087	-0.800726
caup	0	0	0
cav	-0.878164	-0.210242	1.08841
caz	0.186207	0.893809	-1.08002
cbc	-0.785269	-0.34052	1.12579
Cbl	-0.0451221	1.0218	-0.976675
CBP	1.13914	-0.405945	-0.733193
Cbp20	-0.554922	-0.599491	1.15441
Cbp53E	-0.57735	1.1547	-0.57735
Cbp80	0.782031	0.344729	-1.12676
cbs	0.0999835	0.946252	-1.04624
Cbs	-0.898959	1.0771	-0.178138
cbt	-0.0671744	-0.964719	1.03189
Cby	-0.553727	-0.600656	1.15438
Cc2d2a	-1.08539	0.201463	0.883931
CCAP	-1.09731	0.237317	0.859994
CCDC53	0.24765	0.852906	-1.10056
Ccdc56	-0.376966	-0.756727	1.13369
Ccdc58	-0.689114	-0.45784	1.14695
Ccdc85	-1.14213	0.718209	0.423923
CCHa2	1.1547	-0.57735	-0.57735
Cchl	-0.321658	-0.799588	1.12125
Ccm3	0.998229	0.00353294	-1.00176
Ccs	-0.84816	-0.254498	1.10266
CCT1	0.541343	0.612624	-1.15397
CCT2	-0.484409	-0.665546	1.14995
CCT3	0.604865	0.549391	-1.15426
CCT4	-0.881562	-0.205079	1.08664
CCT5	0.625662	0.527651	-1.15331
CCT6	0.773196	0.356118	-1.12931
CCT7	0.617305	0.536451	-1.15376
CCT8	0.742505	-1.1371	0.39459
Ccz1	-0.727769	1.14026	-0.412495
cd	0	0	0
CD98hc	-0.366847	-0.764768	1.13162
Cda5	-0.57735	-0.57735	1.1547
CDase	0.559248	0.595265	-1.15451
cdc14	0.330751	0.792723	-1.12347
Cdc16	-0.671323	1.14929	-0.477968
Cdc23	0.539985	0.613926	-1.15391
Cdc27	0.608815	0.545303	-1.15412
Cdc2rk	0.0997172	0.946406	-1.04612
Cdc37	-1.11717	0.305723	0.811452
Cdc42	0.761699	0.370723	-1.13242
CDC45L	-0.307298	1.11759	-0.810288
Cdc5	-0.741485	1.13733	-0.395841
CDC50	-0.034331	1.01672	-0.982392
Cdc6	-1.09063	0.873784	0.216848
Cdc7	0.871733	0.219925	-1.09166
Cdep	0.00673122	0.996617	-1.00335
CdGAPr	-0.269526	1.10714	-0.837614
cdi	1.01474	-0.0301558	-0.984581
cDIP	1.1547	-0.57735	-0.57735
Cdk1	-1.04022	0.0860007	0.954222
Cdk12	-1.12576	0.785371	0.340386
Cdk2	-0.599079	1.15442	-0.555346
CDK2AP1	0.678146	-1.14845	0.470302
Cdk4	0.822302	-1.11319	0.290893
Cdk5	-1.02111	0.0436518	0.977459
Cdk5alpha	-1.15378	0.536988	0.616793
Cdk7	-1.11836	0.808086	0.310273
Cdk8	0.860162	0.23707	-1.09723
Cdk9	1.09513	-0.23051	-0.864617
Cdlc2	-0.57735	-0.57735	1.1547
cdm	0.539472	0.614418	-1.15389
Cds	0.707251	0.436847	-1.1441
Cec2	-0.57735	-0.57735	1.1547
CecA1	-0.57735	-0.57735	1.1547
CecA2	-0.58072	-0.573974	1.15469
CecB	-0.57735	-0.57735	1.1547
CecC	-0.889008	-0.193657	1.08266
Ced-12	0.268501	0.838339	-1.10684
ced-6	0.599162	0.555261	-1.15442
Cen	0.371595	0.761007	-1.1326
CenB1A	-1.15449	0.596202	0.558291
CenG1A	-0.587828	-0.566809	1.15464
Cenp-C	-0.852621	1.10068	-0.248062
Cep135	-1.13614	0.746658	0.38948
cep290	0	0	0
Cep89	-0.57735	-0.57735	1.1547
Cep97	0.587307	0.567335	-1.15464
cer	0.281874	0.828811	-1.11068
Cerk	-1.15337	0.62473	0.528637
cert	-0.00788788	1.00392	-0.996033
cerv	0.874494	-1.09027	0.21578
Cf2	0.585075	0.569591	-1.15467
Cfp1	1.06229	-0.139149	-0.923138
cg	-1.13067	0.768272	0.362401
CG10005	-0.57735	-0.57735	1.1547
CG10011	0.0301239	0.984598	-1.01472
CG10026	0.649989	0.501526	-1.15151
CG10031	0	0	0
CG10038	0.262436	-1.10505	0.842612
CG10041	-0.0828907	1.03887	-0.955975
CG10050	-0.58681	-0.567839	1.15465
CG10053	1.07246	-0.16558	-0.906875
CG10055	-0.534859	-0.618823	1.15368
CG10063	0.237416	0.859926	-1.09734
CG10064	1.1547	-0.57735	-0.57735
CG10068	0.904227	0.169803	-1.07403
CG10075	-1.10454	0.843797	0.260746
CG10077	0.955391	0.0839285	-1.03932
CG10082	0.960699	0.0744416	-1.03514
CG10086	0	0	0
CG10089	0	0	0
CG10096	-0.57735	-0.57735	1.1547
CG10098	-0.575602	-0.579096	1.1547
CG10103	-0.713609	-0.42937	1.14298
CG10126	-0.105822	1.0487	-0.942881
CG10132	0.377913	0.75597	-1.13388
CG10137	-0.360675	1.1303	-0.769628
CG10139	-1.15159	0.502389	0.649196
CG10147	-1.02936	0.967799	0.0615571
CG10151	0	0	0
CG10165	-0.719353	-0.422563	1.14192
CG10166	-0.7175	1.14226	-0.424765
CG10171	-1.01746	0.981573	0.0358883
CG10184	-0.647918	-0.50378	1.1517
CG10185	0	0	0
CG10188	0.914607	0.153122	-1.06773
CG10189	-1.12448	0.78953	0.334949
CG10194	1.15234	-0.640023	-0.512321
CG10195	-0.833435	-0.275409	1.10884
CG10208	1.04544	-0.0981086	-0.94733
CG10209	-0.461226	1.14738	-0.68615
CG10214	-0.645919	-0.50595	1.15187
CG10222	-1.14865	0.47207	0.676578
CG10232	0	0	0
CG10237	-0.57735	1.1547	-0.57735
CG1024	0.280642	0.829694	-1.11034
CG10252	-0.258452	1.10386	-0.845403
CG10254	-0.564126	1.1546	-0.590475
CG10265	1.12584	-0.340735	-0.785104
CG10268	0.557283	-1.15447	0.597188
CG10274	-0.392007	1.13661	-0.744607
CG10283	-0.57735	-0.57735	1.1547
CG10286	0.903466	-1.07448	0.171013
CG10307	0	0	0
CG10311	-0.57735	-0.57735	1.1547
CG10321	0.83553	0.272465	-1.10799
CG10324	-0.748157	-0.387627	1.13578
CG10333	-0.838632	-0.268087	1.10672
CG10336	1.14629	-0.452657	-0.693631
CG10337	1.00293	-0.997048	-0.00587737
CG10338	0.0543695	0.971706	-1.02608
CG10340	-0.611451	-0.542565	1.15402
CG10341	-1.10527	0.842082	0.263191
CG10343	-0.907989	-0.163798	1.07179
CG10344	1.00424	-0.995708	-0.0085298
CG10347	-0.851982	-0.248986	1.10097
CG10353	-0.084732	-0.954938	1.03967
CG10359	-0.200308	1.08499	-0.884685
CG10361	0	0	0
CG10365	1.13139	-0.365765	-0.765622
CG10366	1.08457	-0.199089	-0.88548
CG10375	-0.862644	-0.233421	1.09607
CG10376	-0.572042	-0.582642	1.15468
CG10383	1.07013	-0.1594	-0.910726
CG10384	-0.57735	1.1547	-0.57735
CG10395	-0.880865	-0.206141	1.08701
CG10405	-1.12073	0.80115	0.319577
CG10407	0.578328	0.576372	-1.1547
CG10413	0.715916	0.426643	-1.14256
CG10417	-1.15187	0.645959	0.505907
CG10418	-1.15398	0.541615	0.612362
CG10425	0.451888	0.694299	-1.14619
CG10428	-0.50922	1.15212	-0.642898
CG10431	0.775118	0.353653	-1.12877
CG10433	-0.623957	-0.529454	1.15341
CG10435	-0.673484	-0.475547	1.14903
CG10444	-0.334401	1.12435	-0.789947
CG10445	0.659018	0.491632	-1.15065
CG10462	1.09882	-0.856722	-0.242102
CG10463	-1.01815	0.0373539	0.9808
CG10465	-1.12003	0.803208	0.316827
CG10466	-1.14396	0.43592	0.708043
CG10467	-0.672195	1.14919	-0.476992
CG10469	0.699014	0.446442	-1.14546
CG10470	-0.995667	1.00428	-0.00860988
CG10472	1.1547	-0.57735	-0.57735
CG10492	0.53658	0.617183	-1.15376
CG10494	1.12935	-0.356298	-0.773055
CG10495	-0.0498984	1.02402	-0.974117
CG10505	1.15416	-0.546477	-0.607682
CG10508	0.765438	0.366	-1.13144
CG10512	-1.10872	0.274985	0.833738
CG10516	1.01474	-0.984578	-0.0301608
CG10527	-0.665406	-0.484565	1.14997
CG10543	0.488749	0.66163	-1.15038
CG10550	-0.33368	1.12418	-0.790496
CG10555	-0.992452	1.00738	-0.0149292
CG10561	0.947156	0.0984109	-1.04557
CG10565	-0.332746	-0.791207	1.12395
CG10576	-0.886483	-0.197548	1.08403
CG10581	-0.870113	1.09246	-0.222346
CG10584	1.11071	-0.281949	-0.828757
CG10589	0	0	0
CG10600	-0.894743	1.07949	-0.184749
CG10602	1.13879	-0.734839	-0.403948
CG10616	-0.0499787	1.02405	-0.974074
CG10621	-0.565502	1.15462	-0.589118
CG10623	-0.214231	1.08975	-0.875523
CG10628	1.1526	-0.516044	-0.636558
CG10631	0.343662	0.782853	-1.12652
CG10638	0.0746441	0.960586	-1.03523
CG10646	0.58456	-1.15467	0.57011
CG10650	-0.57735	-0.57735	1.1547
CG10654	0.534642	0.61903	-1.15367
CG10657	0	0	0
CG10660	0.885903	0.198439	-1.08434
CG10663	0	0	0
CG10669	-0.76649	1.13116	-0.364665
CG10672	-1.03274	0.963685	0.0690508
CG10674	-0.850011	1.10184	-0.251834
CG10681	1.09808	-0.858331	-0.239752
CG10694	0	0	0
CG10702	1.13725	-0.395436	-0.741815
CG10730	0	0	0
CG10731	0.87837	-1.0883	0.20993
CG10734	-0.57735	-0.57735	1.1547
CG10737	-0.852344	1.10081	-0.248463
CG10738	-0.94227	1.04915	-0.106876
CG1074	-1.14737	0.4612	0.686172
CG10747	-0.244029	1.09943	-0.855399
CG10764	0.0795435	0.957853	-1.0374
CG1077	1.01675	-0.982358	-0.0343959
CG10778	1.14074	-0.725379	-0.415366
CG10795	1.01976	-0.0407654	-0.978994
CG10799	1.082	-0.191763	-0.890233
CG10801	0	0	0
CG10802	-0.814823	1.11596	-0.301142
CG10803	1.04973	-0.108275	-0.941457
CG10804	0	0	0
CG10809	-1.106	0.265643	0.840356
CG10814	0	0	0
CG10822	-0.57735	1.1547	-0.57735
CG10841	1.1547	-0.57735	-0.57735
CG10859	0.716792	0.425604	-1.1424
CG10862	1.1547	-0.57735	-0.57735
CG10863	-0.472658	1.14871	-0.676056
CG10866	0.593865	0.560676	-1.15454
CG10869	0	0	0
CG10874	0.368619	0.763367	-1.13199
CG10877	0.627167	0.526057	-1.15322
CG10889	-0.374968	1.13329	-0.758322
CG10898	1.05767	-0.127578	-0.930089
CG1090	0.937743	0.114634	-1.05238
CG10903	-0.591356	-0.56323	1.15459
CG10904	-0.590471	1.1546	-0.564129
CG10907	-1.09036	0.216047	0.874317
CG10914	0.978083	0.0424798	-1.02056
CG10916	-0.00114482	1.00057	-0.999427
CG1092	0.445654	0.699694	-1.14535
CG10927	-0.130979	1.05904	-0.928057
CG10931	0	0	0
CG10932	-0.215749	1.09026	-0.874515
CG10936	-0.57735	-0.57735	1.1547
CG10939	0.796985	0.325117	-1.1221
CG10947	-0.57735	-0.57735	1.1547
CG10948	0.583751	-1.15468	0.570926
CG10949	-0.858324	1.09809	-0.239762
CG10958	1.14074	-0.725396	-0.415345
CG10959	-0.57735	1.1547	-0.57735
CG10960	-0.601074	-0.553297	1.15437
CG10962	1.14876	-0.473069	-0.67569
CG10970	-0.57735	1.1547	-0.57735
CG10973	-0.736795	-0.40157	1.13836
CG10979	-0.335842	1.12469	-0.788849
CG10984	0.757613	0.375857	-1.13347
CG11000	-0.990809	1.00894	-0.0181363
CG11007	-0.812788	-0.30391	1.1167
CG1103	0.722917	0.418313	-1.14123
CG11030	-0.724493	-0.416427	1.14092
CG11034	-0.57735	-0.57735	1.1547
CG11035	0.756349	0.377439	-1.13379
CG1105	-1.07046	0.910171	0.160293
CG11050	-0.535187	-0.618511	1.1537
CG11052	-0.57735	-0.57735	1.1547
CG11068	1.1547	-0.57735	-0.57735
CG11069	0	0	0
CG11070	-0.40058	1.13819	-0.737608
CG11076	-0.499363	-0.651971	1.15133
CG11077	-0.512959	1.15239	-0.63943
CG11089	-0.844687	-0.259476	1.10416
CG11095	1.12304	-0.328966	-0.794076
CG11103	0.501362	0.650139	-1.1515
CG11106	-0.57735	1.1547	-0.57735
CG11109	-1.00783	0.0158454	0.991983
CG11110	-0.756827	-0.376841	1.13367
CG11122	-0.108803	1.04995	-0.94115
CG11123	0.0235124	0.988036	-1.01155
CG11125	-0.929819	-0.12803	1.05785
CG11127	0.987777	0.0240138	-1.01179
CG11134	-0.693551	1.1463	-0.45275
CG11137	-1.1514	0.5001	0.651296
CG11141	-0.661142	-0.489288	1.15043
CG11151	0.167995	0.905363	-1.07336
CG11155	0.757375	0.376155	-1.13353
CG11158	0.5368	-1.15377	0.616972
CG1116	-0.130552	1.05886	-0.928312
CG11164	-0.331	1.12353	-0.792534
CG11168	0.540911	0.613038	-1.15395
CG11170	0.315636	0.804097	-1.11973
CG11178	0.290667	-1.11313	0.822466
CG11180	-0.651754	-0.499601	1.15135
CG11200	0.740174	0.397446	-1.13762
CG11236	-0.57735	-0.57735	1.1547
CG1124	1.14857	-0.677198	-0.471371
CG11241	0.905299	0.168096	-1.0734
CG11247	-1.01929	0.0397755	0.979519
CG11248	-0.646811	-0.504983	1.15179
CG11249	1.1525	-0.514533	-0.637967
CG11257	-0.872548	1.09125	-0.218703
CG11267	-0.681193	-0.466858	1.14805
CG11275	0	0	0
CG11279	-1.15243	0.513606	0.638829
CG1129	-1.14308	0.713026	0.430059
CG11291	-0.57735	-0.57735	1.1547
CG11294	1.1547	-0.57735	-0.57735
CG11307	-0.677185	-0.471386	1.14857
CG11309	-0.638621	1.15245	-0.513829
CG11313	1.08121	-0.189565	-0.89165
CG11318	-0.57735	1.1547	-0.57735
CG11319	0	0	0
CG11322	-0.57735	-0.57735	1.1547
CG11327	-0.57735	1.1547	-0.57735
CG11334	1.12001	-0.803295	-0.31671
CG11342	-0.859039	-0.238716	1.09776
CG11350	0	0	0
CG11353	-0.57735	-0.57735	1.1547
CG11357	0.184072	-1.07925	0.895176
CG1136	0	0	0
CG11360	-0.981671	1.01737	-0.0357013
CG11362	0	0	0
CG11367	0.149592	0.916777	-1.06637
CG1137	-0.57735	1.1547	-0.57735
CG11373	0	0	0
CG11374	-0.57735	1.1547	-0.57735
CG11377	-1.14939	0.670526	0.47886
CG11378	0	0	0
CG11396	1.1486	-0.47167	-0.676933
CG11398	-0.851865	-0.249156	1.10102
CG11399	-0.29457	1.1142	-0.819629
CG11400	-0.57735	-0.57735	1.1547
CG11403	-0.683369	1.14776	-0.464389
CG11406	1.12496	-0.336967	-0.787989
CG11413	1.12686	-0.345152	-0.781705
CG11414	1.14231	-0.425057	-0.717254
CG11417	-0.68109	-0.466975	1.14806
CG1142	-0.787991	-0.336965	1.12496
CG11426	-0.57735	-0.57735	1.1547
CG1143	-0.845364	1.10387	-0.258508
CG11436	-0.171627	1.07471	-0.903079
CG11438	0	0	0
CG11444	-0.519821	-0.633028	1.15285
CG11447	-0.771707	1.12973	-0.358023
CG11454	0.981891	-1.01717	0.0352837
CG11456	-0.330349	-0.793028	1.12338
CG1146	1.12725	-0.780363	-0.346891
CG11474	-0.366935	1.13163	-0.764699
CG11475	1.1547	-0.57735	-0.57735
CG11486	-0.171454	-0.903188	1.07464
CG11504	0.819593	0.294618	-1.11421
CG11523	1.01476	-0.0301992	-0.984558
CG11537	-0.0279451	-0.985735	1.01368
CG11539	-0.807777	-0.31069	1.11847
CG11555	-0.709061	-0.434725	1.14379
CG11560	0.332512	-1.1239	0.791385
CG11562	-0.114234	-0.937977	1.05221
CG11563	-0.754031	-0.380334	1.13436
CG11583	-0.764832	-0.366766	1.1316
CG11586	-1.13741	0.396315	0.741098
CG11590	0.589934	0.564675	-1.15461
CG11593	-0.658488	-0.492215	1.1507
CG11594	1.15469	-0.57238	-0.582306
CG11596	-0.629543	-0.523535	1.15308
CG11597	-0.960905	1.03498	-0.0740713
CG11598	0.950662	-1.04294	0.0922785
CG11601	-0.613668	-0.540254	1.15392
CG1161	0.425252	0.717089	-1.14234
CG11619	1.1547	-0.57735	-0.57735
CG11638	-0.970146	-0.0572493	1.02739
CG11655	0.563945	0.590652	-1.1546
CG11656	-0.57735	1.1547	-0.57735
CG11658	-1.13194	0.36839	0.763548
CG11663	-0.57735	1.1547	-0.57735
CG11674	-0.57735	1.1547	-0.57735
CG11679	-0.880545	-0.206628	1.08717
CG11686	-1.15002	0.664945	0.485077
CG11695	0.587659	0.56698	-1.15464
CG11696	-1.15321	0.627321	0.525894
CG11699	0.76459	0.367072	-1.13166
CG11700	-1.11285	0.289635	0.823214
CG11710	-0.527866	-0.625459	1.15332
CG1172	-0.0558104	-0.970926	1.02674
CG11722	-0.96765	-0.0618305	1.02948
CG11723	0.864461	0.23074	-1.0952
CG11737	0.363271	0.767588	-1.13086
CG11752	-1.0317	0.964952	0.0667507
CG11753	0.890895	-1.08163	0.190735
CG11755	-0.960946	-0.0739962	1.03494
CG11756	0	0	0
CG11760	0.312354	0.806541	-1.1189
CG11768	1.04824	-0.104722	-0.943518
CG11771	1.04283	-0.0920131	-0.950814
CG11777	0.501365	-1.1515	0.650137
CG11779	1.01348	-0.0275185	-0.985957
CG11781	-0.610404	1.15406	-0.543653
CG11786	-0.57735	1.1547	-0.57735
CG11788	-0.892754	1.0806	-0.187848
CG11790	-0.861527	-0.235065	1.09659
CG11791	-0.248997	-0.851975	1.10097
CG11807	0.41856	0.72271	-1.14127
CG11808	1.12542	-0.786494	-0.338921
CG11811	-0.850817	-0.25067	1.10149
CG11815	0	0	0
CG11825	0.840329	0.265682	-1.10601
CG11835	0	0	0
CG11836	1.12804	-0.350356	-0.77768
CG11837	-1.03532	0.0748459	0.960474
CG11839	-1.03793	0.957168	0.0807648
CG11842	0	0	0
CG11852	0.656379	0.494535	-1.15091
CG11854	0.217188	0.873558	-1.09075
CG11857	-1.15461	0.564626	0.589982
CG11858	-1.15392	0.613754	0.540165
CG11873	-0.741951	-0.395269	1.13722
CG11882	0.187587	0.892923	-1.08051
CG11883	-0.57735	-0.57735	1.1547
CG11885	-0.553331	1.15437	-0.601041
CG11893	1.09496	-0.229991	-0.864968
CG11899	0.545865	0.608274	-1.15414
CG11902	0.953794	0.0867592	-1.04055
CG11906	0.277411	0.832007	-1.10942
CG11911	-0.57735	1.1547	-0.57735
CG11920	-1.06964	0.158117	0.911522
CG11927	0.218866	0.872439	-1.09131
CG11929	0	0	0
CG11961	0.422002	0.719825	-1.14183
CG11964	-1.13024	0.769845	0.360398
CG11970	1.13008	-0.359636	-0.770443
CG11975	1.14512	-0.444004	-0.701115
CG11980	-0.492434	-0.658289	1.15072
CG11983	-0.756339	1.13379	-0.377452
CG11986	-0.262545	1.10508	-0.842535
CG11999	-1.14315	0.712681	0.430466
CG12003	0.41961	0.721831	-1.14144
CG12004	-1.01231	0.0250915	0.987218
CG12007	-1.1206	0.801526	0.319075
CG12010	-0.431442	1.14329	-0.711853
CG12012	0.831911	-1.10946	0.277545
CG12016	0.18488	0.894659	-1.07954
CG12024	-0.684265	1.14764	-0.463371
CG12025	-1.00216	0.997822	0.0043426
CG12054	0.991234	-1.00854	0.0173081
CG12056	0.954508	0.0854938	-1.04
CG12065	0.266518	0.83974	-1.10626
CG12071	0.855609	-1.09933	0.243723
CG12075	1.08673	-0.881394	-0.205336
CG1208	-0.57735	-0.57735	1.1547
CG12081	1.07355	-0.168513	-0.905037
CG12084	0.896328	0.18227	-1.0786
CG12091	-0.935976	-0.117641	1.05362
CG12093	0.19388	0.888863	-1.08274
CG12096	-0.667463	-0.482277	1.14974
CG12099	0.819896	0.294202	-1.1141
CG12104	0.530115	0.62333	-1.15345
CG12105	0.566978	-1.15464	0.587661
CG12106	0.563314	0.591274	-1.15459
CG12107	-0.895489	-0.183583	1.07907
CG12112	-0.557371	-0.597102	1.15447
CG12116	1.10252	-0.254058	-0.848466
CG12118	-1.0825	0.193191	0.889309
CG12121	-0.303543	1.1166	-0.813058
CG12123	-1.13501	0.383622	0.751389
CG12126	0	0	0
CG12128	-0.323096	-0.798507	1.1216
CG12129	-0.868706	-0.224444	1.09315
CG1213	-0.57735	-0.57735	1.1547
CG12133	-0.57735	-0.57735	1.1547
CG12134	-1.05876	0.130304	0.92846
CG12155	1.1547	-0.578361	-0.576339
CG12159	0.493392	0.657419	-1.15081
CG12163	0.628314	0.52484	-1.15315
CG12170	-0.969341	-0.0587287	1.02807
CG12171	0.197375	0.886595	-1.08397
CG12173	-0.636371	-0.516245	1.15262
CG12177	0.413764	0.726713	-1.14048
CG12179	-1.08998	0.214899	0.87508
CG1218	-0.177965	1.07703	-0.899069
CG12182	-0.364381	1.13109	-0.766714
CG12184	0.0929554	0.950277	-1.04323
CG12194	-0.770329	1.13011	-0.359782
CG12204	-0.580253	1.1547	-0.574443
CG12206	-0.871104	1.09197	-0.220865
CG12209	-1.0859	0.882977	0.202922
CG12213	0.589688	0.564924	-1.15461
CG12219	-0.163547	1.07169	-0.908145
CG12224	-0.57735	-0.57735	1.1547
CG12236	0.377658	0.756174	-1.13383
CG12237	0.613922	0.539989	-1.15391
CG12241	1.10905	-0.276131	-0.832921
CG12253	-1.01017	0.989506	0.0206669
CG12259	-0.700303	-0.444947	1.14525
CG12267	-0.714557	-0.42825	1.14281
CG1227	-0.77045	1.13008	-0.359628
CG12279	-0.870548	1.09224	-0.221697
CG12288	-0.656334	-0.494584	1.15092
CG12290	1.154	-0.611846	-0.542154
CG12299	0.643135	0.508964	-1.1521
CG12301	-0.56248	-0.592094	1.15457
CG12316	-0.68596	1.1474	-0.461441
CG12320	-0.78705	-0.338195	1.12525
CG12321	-0.773609	1.1292	-0.355589
CG12325	-0.729994	-0.409813	1.13981
CG1233	0.525822	0.627388	-1.15321
CG12333	0.552687	0.601667	-1.15435
CG12338	-0.724918	-0.415917	1.14084
CG1234	-0.684337	-0.463289	1.14763
CG12341	1.14976	-0.667281	-0.482479
CG12343	-0.88916	-0.193421	1.08258
CG12344	0.952337	0.0893327	-1.04167
CG12355	-0.57735	-0.57735	1.1547
CG1236	-1.04556	0.947163	0.0983986
CG12362	0	0	0
CG12374	-0.57735	-0.57735	1.1547
CG12375	0.713769	0.429182	-1.14295
CG12376	0	0	0
CG12379	-1.15469	0.572461	0.582225
CG12384	-1.11774	0.809848	0.307894
CG1239	-0.996423	1.00354	-0.0071157
CG12391	-0.653392	-0.497809	1.1512
CG12446	0	0	0
CG12448	0	0	0
CG1246	0.864612	0.230518	-1.09513
CG12470	-1.02346	0.974757	0.0487069
CG12493	0	0	0
CG12499	-0.93804	-0.114127	1.05217
CG12512	0.611921	0.542075	-1.154
CG12519	-0.446005	1.1454	-0.699391
CG12531	0.838249	0.268628	-1.10688
CG12535	0.635166	0.517536	-1.1527
CG12541	-0.57735	-0.57735	1.1547
CG12547	-0.613453	-0.540479	1.15393
CG12560	-0.682659	-0.465195	1.14785
CG12567	-0.296714	1.11478	-0.818064
CG12576	0.251317	0.850369	-1.10169
CG12581	-0.57735	-0.57735	1.1547
CG12592	1.03072	-0.0645598	-0.966156
CG12594	-1.12212	0.325177	0.79694
CG12605	0	0	0
CG12608	-0.697903	-0.447728	1.14563
CG12617	-0.57735	1.1547	-0.57735
CG12643	0.166277	0.906439	-1.07272
CG1265	-0.342429	1.12623	-0.783802
CG12655	0	0	0
CG12659	-1.152	0.644402	0.507594
CG12674	1.08742	-0.207351	-0.880069
CG12689	-0.57735	1.1547	-0.57735
CG12692	-0.57735	1.1547	-0.57735
CG12693	0	0	0
CG12698	0	0	0
CG12699	-0.10837	1.04977	-0.941401
CG12702	0.314258	0.805124	-1.11938
CG1271	0.617819	0.535913	-1.15373
CG12713	-1.12971	0.771774	0.357937
CG12717	-0.630249	-0.522784	1.15303
CG12725	0	0	0
CG12728	0.834304	0.274189	-1.10849
CG12730	0.0240431	0.987762	-1.0118
CG12744	0.0409896	0.978875	-1.01986
CG12746	-1.14925	0.477573	0.671677
CG1275	0.726179	0.414405	-1.14058
CG12766	0	0	0
CG12768	0.591271	0.563317	-1.15459
CG12773	1.15432	-0.551652	-0.602672
CG12795	-0.31671	-0.803295	1.12001
CG12811	1.10013	-0.246271	-0.853857
CG12814	0	0	0
CG12818	-1.04289	0.950736	0.0921497
CG12822	0.981228	-1.01777	0.0365414
CG12824	-0.634618	1.15274	-0.518122
CG12825	1.06859	-0.155367	-0.913223
CG12826	-0.57735	-0.57735	1.1547
CG12836	0.997239	0.00549844	-1.00274
CG12848	-0.948304	1.04471	-0.0964087
CG12851	0.608015	-1.15415	0.546132
CG12853	0.949036	0.0951286	-1.04416
CG12857	-0.57735	1.1547	-0.57735
CG12860	1.1547	-0.57735	-0.57735
CG12861	0	0	0
CG12863	0.189314	0.891811	-1.08113
CG12868	-1.1545	0.558558	0.595941
CG12869	-0.57735	-0.57735	1.1547
CG12877	0.0492078	-1.0237	0.974488
CG1288	0.567776	0.586872	-1.15465
CG12880	0	0	0
CG12883	1.15221	-0.641697	-0.510517
CG12895	-1.07421	0.903923	0.170286
CG12896	-0.679218	1.14831	-0.469092
CG12909	-0.399905	-0.738161	1.13807
CG12910	-0.57735	-0.57735	1.1547
CG12913	1.1547	-0.57735	-0.57735
CG12917	0	0	0
CG12920	0.00371905	0.998135	-1.00185
CG12923	0	0	0
CG12926	0.188318	0.892452	-1.08077
CG12929	-0.615196	1.15385	-0.538659
CG12934	0.229204	0.8655	-1.0947
CG12935	-0.898839	1.07717	-0.178327
CG12942	0.218537	0.872659	-1.0912
CG12945	-1.14442	0.439063	0.705356
CG12947	0.127201	0.930313	-1.05751
CG12948	-1.14206	0.718593	0.423467
CG12963	-1.14698	0.458021	0.688956
CG12971	-0.57735	-0.57735	1.1547
CG12974	-0.57735	-0.57735	1.1547
CG12975	-0.841108	-0.264576	1.10568
CG12984	-0.57735	1.1547	-0.57735
CG12990	0	0	0
CG12991	0	0	0
CG12992	-0.57735	1.1547	-0.57735
CG13000	-0.57735	-0.57735	1.1547
CG13001	-0.667412	1.14975	-0.482334
CG13003	-0.57735	-0.57735	1.1547
CG13004	1.11336	-0.821861	-0.291499
CG13005	0.0407514	-1.01975	0.979001
CG13010	-0.57735	1.1547	-0.57735
CG13012	-0.57735	1.1547	-0.57735
CG13014	-1.10463	0.261026	0.843601
CG13016	-0.985932	1.0135	-0.0275656
CG13018	-0.766356	1.13119	-0.364835
CG13021	0.83827	-1.10687	0.268598
CG13024	0	0	0
CG13025	0.387638	0.748148	-1.13579
CG13032	-0.909875	1.07065	-0.160771
CG1307	-0.536788	-0.616984	1.15377
CG13074	0.67958	0.468682	-1.14826
CG13077	-0.687721	-0.459432	1.14715
CG13078	-0.57735	-0.57735	1.1547
CG13085	0.574867	0.57983	-1.1547
CG13086	1.03608	-0.0765716	-0.959513
CG13088	-1.1046	0.260922	0.843674
CG1309	-1.06375	0.920884	0.142865
CG13096	-0.720282	-0.421457	1.14174
CG13097	-0.787486	-0.337625	1.12511
CG13101	-0.680443	1.14815	-0.467707
CG13102	-0.57735	-0.57735	1.1547
CG13108	-0.57735	1.1547	-0.57735
CG13116	-0.487821	-0.662468	1.15029
CG13117	0.657573	-1.1508	0.493223
CG13123	1.1175	-0.306977	-0.810526
CG13124	-0.949287	-0.09469	1.04398
CG13126	-0.951092	1.04262	-0.0915238
CG13127	-0.57735	-0.57735	1.1547
CG13138	0	0	0
CG13144	1.00128	-0.00255995	-0.998718
CG13148	0	0	0
CG13151	0.760512	-1.13273	0.372217
CG13154	-0.57735	1.1547	-0.57735
CG13155	-0.57735	1.1547	-0.57735
CG13159	-0.57735	-0.57735	1.1547
CG1316	-0.983552	-0.0321212	1.01567
CG13160	-0.57735	-0.57735	1.1547
CG13168	-0.57735	1.1547	-0.57735
CG1317	1.07523	-0.173039	-0.902189
CG13175	1.14938	-0.478795	-0.670584
CG13185	-1.02285	0.975462	0.0473905
CG13192	-0.900243	-0.176115	1.07636
CG13197	-0.56011	-0.59442	1.15453
CG13204	0.905836	0.16724	-1.07308
CG13220	-0.945391	-0.10148	1.04687
CG13229	0	0	0
CG13231	-0.57735	1.1547	-0.57735
CG1324	-0.57735	1.1547	-0.57735
CG13244	-1.14389	0.708483	0.435404
CG13247	0	0	0
CG13248	0	0	0
CG13252	-0.57735	-0.57735	1.1547
CG13255	1.15091	-0.656366	-0.494549
CG13258	-0.57735	-0.57735	1.1547
CG13282	1.1547	-0.57735	-0.57735
CG13293	0	0	0
CG13295	0.617506	0.536241	-1.15375
CG13300	1.09664	-0.235218	-0.861423
CG13314	-0.57735	-0.57735	1.1547
CG13315	0.733437	0.405649	-1.13909
CG13319	-0.560043	-0.594487	1.15453
CG13321	-0.692353	-0.454127	1.14648
CG13337	0	0	0
CG13339	-1.13927	0.406679	0.732587
CG13344	1.14511	-0.443971	-0.701144
CG13358	0	0	0
CG13359	0	0	0
CG13360	-0.131689	1.05932	-0.927631
CG13362	0	0	0
CG13364	-1.09535	0.231203	0.864148
CG13365	-1.00664	0.0134231	0.993221
CG13366	-1.12485	0.336507	0.788341
CG13367	-0.444913	-0.700332	1.14525
CG13369	0.270252	0.8371	-1.10735
CG13373	-0.682678	1.14785	-0.465174
CG13375	-0.965697	1.03109	-0.065395
CG13377	1.03054	-0.064172	-0.966369
CG13384	0.615677	0.538156	-1.15383
CG13390	0.210454	0.878023	-1.08848
CG13392	0.54752	-1.1542	0.606675
CG13397	-1.15445	0.598072	0.556378
CG13398	-0.836306	-0.271372	1.10768
CG13405	1.04264	-0.0915845	-0.951057
CG13409	0.601024	-1.15437	0.553348
CG13430	1.12242	-0.326423	-0.796
CG13436	0	0	0
CG13437	-0.57735	-0.57735	1.1547
CG1344	0.863152	0.232673	-1.09582
CG13442	0	0	0
CG13449	0	0	0
CG13457	-0.57735	1.1547	-0.57735
CG13458	0	0	0
CG13482	-0.57735	-0.57735	1.1547
CG13484	-1.15297	0.631139	0.521835
CG13488	0.740957	0.396488	-1.13744
CG13506	-0.57735	-0.57735	1.1547
CG13510	0.645152	0.506781	-1.15193
CG13511	0.645152	0.506781	-1.15193
CG13516	-0.432753	-0.710739	1.14349
CG13531	0.313925	0.805372	-1.1193
CG1354	-1.0263	0.0548634	0.971439
CG13540	-0.57735	1.1547	-0.57735
CG13544	-0.57735	1.1547	-0.57735
CG13551	-0.564525	-0.590081	1.15461
CG13559	-0.752647	-0.382057	1.1347
CG13562	0.72434	0.416611	-1.14095
CG13563	-1.00056	0.999436	0.00112671
CG13578	0	0	0
CG1358	-0.407981	1.13949	-0.731511
CG13585	0.801059	0.319699	-1.12076
CG13599	-1.14961	0.668618	0.48099
CG1360	-0.111207	1.05096	-0.939748
CG13601	0.378074	0.755841	-1.13392
CG13603	0.691882	0.454668	-1.14655
CG13604	-0.376455	-0.757136	1.13359
CG13605	-0.152875	1.06763	-0.91476
CG13607	1.1547	-0.57735	-0.57735
CG13609	1.15062	-0.491353	-0.65927
CG13623	-0.921616	1.06328	-0.14166
CG13625	-0.558745	-0.595758	1.1545
CG13630	-0.76231	-0.369952	1.13226
CG13631	0.572671	-1.15469	0.582017
CG13654	0.988948	0.0217488	-1.0107
CG13659	0	0	0
CG13663	-0.0507201	-0.973675	1.02439
CG13667	-0.732822	-0.406395	1.13922
CG13671	0.114217	0.937988	-1.0522
CG13676	1.07741	-0.178991	-0.898417
CG13689	-0.929367	1.05815	-0.128787
CG13690	-0.488004	-0.662303	1.15031
CG13692	-0.57735	1.1547	-0.57735
CG13693	0	0	0
CG13694	0	0	0
CG13698	-0.57735	-0.57735	1.1547
CG13707	0	0	0
CG1371	0.800492	0.320455	-1.12095
CG13739	0	0	0
CG13741	-0.57735	1.1547	-0.57735
CG13742	-0.803405	1.11997	-0.316563
CG13743	-0.57735	1.1547	-0.57735
CG13747	-0.57735	1.1547	-0.57735
CG13749	0	0	0
CG13751	0.337199	0.787812	-1.12501
CG13760	1.06272	-0.92247	-0.140252
CG13766	0.450646	0.695377	-1.14602
CG13773	-0.593186	-0.561369	1.15455
CG13775	1.05652	-0.124757	-0.931768
CG13784	-1.1399	0.729546	0.410354
CG13807	0.488278	0.662056	-1.15033
CG13813	-0.57735	1.1547	-0.57735
CG13827	0.933684	-1.05521	0.121525
CG13850	-0.760142	-0.372683	1.13282
CG13868	-0.659049	-0.491598	1.15065
CG13871	-0.57735	1.1547	-0.57735
CG13875	1.12854	-0.352617	-0.775923
CG13876	-1.13128	0.76604	0.365236
CG13877	0.43092	0.712295	-1.14322
CG13887	0.288806	-1.11262	0.823814
CG13891	-0.57735	-0.57735	1.1547
CG13893	1.14156	-0.420376	-0.721189
CG13895	0.992219	0.0153852	-1.0076
CG13896	-0.475928	-0.673145	1.14907
CG13898	-0.57735	1.1547	-0.57735
CG13901	-1.05481	0.120551	0.93426
CG13907	0.541862	0.612126	-1.15399
CG13917	1.10013	-0.246271	-0.853856
CG13919	-1.03704	0.0787332	0.958306
CG13920	1.12196	-0.324528	-0.797429
CG13921	0.953831	0.0866929	-1.04052
CG13926	-0.569842	1.15467	-0.584826
CG13928	0.774833	-1.12885	0.354018
CG13933	0.873557	0.21719	-1.09075
CG13937	-0.479098	-0.670313	1.14941
CG1394	-0.57735	1.1547	-0.57735
CG13982	1.1097	-0.278394	-0.831304
CG13992	-0.57735	-0.57735	1.1547
CG13994	-0.174222	1.07566	-0.901441
CG14005	1.15399	-0.612006	-0.541986
CG14015	0	0	0
CG14020	1.1013	-0.250076	-0.851229
CG14024	-0.57735	-0.57735	1.1547
CG14036	0.566689	0.587946	-1.15464
CG14042	1.1547	-0.57735	-0.57735
CG14043	-1.1541	0.609369	0.544729
CG14044	1.1547	-0.57735	-0.57735
CG14050	-1.12437	0.789881	0.334489
CG14053	0	0	0
CG14054	0	0	0
CG14057	-1.06869	0.15563	0.913061
CG1407	-1.14068	0.414952	0.725723
CG14072	1.1547	-0.57735	-0.57735
CG14073	-1.08214	0.192175	0.889966
CG14074	-0.486828	1.15019	-0.663365
CG14077	-0.57735	1.1547	-0.57735
CG14079	0.187152	0.893202	-1.08035
CG14100	-0.751239	1.13505	-0.383808
CG14102	-0.669076	1.14956	-0.480479
CG14104	-0.578431	1.1547	-0.576269
CG14105	-1.08199	0.191753	0.890239
CG14109	0	0	0
CG14113	-0.643472	1.15207	-0.5086
CG14117	0.635758	0.516901	-1.15266
CG14130	-0.873014	-0.218005	1.09102
CG14132	-0.57735	-0.57735	1.1547
CG14135	-0.835711	-0.27221	1.10792
CG14142	0.989916	0.0198725	-1.00979
CG14154	-1.10879	0.275216	0.833573
CG1416	-0.822058	-0.291229	1.11329
CG14174	-0.643603	-0.508459	1.15206
CG1418	0.157237	-1.0693	0.912067
CG14182	-1.1196	0.80449	0.31511
CG14183	-0.953216	-0.0877813	1.041
CG14184	-1.1545	0.595793	0.558709
CG14194	1.14372	-0.434258	-0.709459
CG14196	0	0	0
CG14200	0.312595	0.806362	-1.11896
CG14207	0.148912	-1.06611	0.917194
CG14210	-1.14464	0.44063	0.704014
CG14212	-0.57735	1.1547	-0.57735
CG14220	-0.573302	-0.581389	1.15469
CG14221	0.620296	-1.15361	0.533312
CG14223	-0.57735	-0.57735	1.1547
CG14229	0.521659	0.631305	-1.15296
CG14230	-0.947362	-0.0980517	1.04541
CG14231	-1.12789	0.778198	0.349688
CG14232	1.05138	-0.939152	-0.112228
CG14252	0.657463	0.493343	-1.15081
CG14253	-0.670416	-0.478983	1.1494
CG14257	-0.57735	-0.57735	1.1547
CG14260	-0.57735	1.1547	-0.57735
CG14262	-0.57735	-0.57735	1.1547
CG14269	0	0	0
CG14270	-1.00369	0.00741883	0.99627
CG14273	0	0	0
CG14275	0	0	0
CG14285	0.62016	-1.15361	0.533454
CG14286	-1.15318	0.525255	0.627923
CG14292	0	0	0
CG14294	-0.57735	1.1547	-0.57735
CG14297	-0.68889	1.14699	-0.458097
CG14302	1.13884	-0.404258	-0.734584
CG14305	1.1547	-0.57735	-0.57735
CG14312	-0.57735	1.1547	-0.57735
CG14314	0	0	0
CG14322	0.543583	-1.15405	0.610472
CG14325	0	0	0
CG14332	0	0	0
CG1434	0.250191	-1.10134	0.851149
CG14341	-0.310097	1.11831	-0.808217
CG14346	0	0	0
CG14352	0.0465801	-1.02248	0.975896
CG14355	0	0	0
CG14367	-0.57735	-0.57735	1.1547
CG1440	0.850078	0.251736	-1.10181
CG14401	1.14661	-0.455163	-0.69145
CG14402	0	0	0
CG14406	1.06727	-0.151935	-0.915338
CG14407	-0.840759	-0.265071	1.10583
CG14408	-0.873592	1.09073	-0.217136
CG14411	-0.0320021	1.01562	-0.983615
CG14414	-1.15459	0.563258	0.591329
CG14431	-0.965517	-0.0657232	1.03124
CG14434	-0.926373	-0.133786	1.06016
CG14435	1.13757	-0.397182	-0.74039
CG14440	0.955685	0.0834061	-1.03909
CG14441	0.0633023	0.966845	-1.03015
CG14442	1.0986	-0.241391	-0.857209
CG14443	0	0	0
CG14450	-0.707848	-0.436147	1.144
CG14451	-1.11936	0.805203	0.314152
CG14459	0	0	0
CG14464	-0.90705	-0.165301	1.07235
CG14478	1.15392	-0.540229	-0.613692
CG14480	-0.6604	-0.490107	1.15051
CG14483	-1.00033	0.99967	0.00065968
CG14488	-0.57735	1.1547	-0.57735
CG14490	-1.13612	0.38937	0.746747
CG14491	0	0	0
CG14502	-1.13563	0.748813	0.386815
CG14511	-0.0226474	1.01113	-0.988484
CG14512	-1.14014	0.411772	0.728369
CG14516	1.1547	-0.57735	-0.57735
CG14535	0.182769	0.896009	-1.07878
CG14540	-0.57735	1.1547	-0.57735
CG14543	-0.721107	-0.420474	1.14158
CG14544	-1.12197	0.32458	0.79739
CG14545	-0.57735	1.1547	-0.57735
CG14556	-0.652518	-0.498766	1.15128
CG14561	-0.929195	-0.129075	1.05827
CG14562	-0.18149	1.07832	-0.896826
CG14566	0	0	0
CG14567	-0.57735	-0.57735	1.1547
CG14572	0	0	0
CG14579	-0.57735	1.1547	-0.57735
CG14589	-0.57735	-0.57735	1.1547
CG14605	-0.57735	1.1547	-0.57735
CG14609	1.11599	-0.301254	-0.81474
CG1461	0	0	0
CG14610	-0.742812	-0.394214	1.13703
CG14613	0.233518	-1.0961	0.862579
CG14615	1.07815	-0.181044	-0.89711
CG14618	-1.1357	0.748508	0.387193
CG14621	0.640297	0.512027	-1.15232
CG14628	-0.57735	1.1547	-0.57735
CG14629	-0.0405113	1.01964	-0.979129
CG1463	-0.369608	-0.762583	1.13219
CG14630	1.06076	-0.135308	-0.925457
CG14636	-0.57735	-0.57735	1.1547
CG14641	-0.284255	-0.827098	1.11135
CG14642	0.155815	0.912946	-1.06876
CG14645	1.1547	-0.57735	-0.57735
CG14646	-0.676432	1.14867	-0.472234
CG14647	0.989649	0.0203907	-1.01004
CG14650	0.523909	0.629191	-1.1531
CG14655	0.331725	0.791983	-1.12371
CG14657	-0.156792	1.06913	-0.912342
CG14658	0	0	0
CG14662	-0.57735	1.1547	-0.57735
CG14664	1.03703	-0.0787133	-0.958317
CG14667	-1.13318	0.758764	0.374414
CG14669	-0.931898	1.05644	-0.124537
CG14671	-1.04985	0.941288	0.108565
CG14683	-0.769749	-0.360521	1.13027
CG14688	-0.0472157	1.02277	-0.975556
CG14692	0	0	0
CG14693	0	0	0
CG14694	-0.661174	1.15043	-0.489253
CG14695	0.528235	0.62511	-1.15335
CG14696	0.479971	0.669531	-1.1495
CG14701	-0.699455	-0.44593	1.14539
CG14708	-0.57735	1.1547	-0.57735
CG14710	0.740454	0.397103	-1.13756
CG14711	-0.982969	1.0162	-0.0332335
CG14712	0.669158	0.480388	-1.14955
CG14715	0.800327	0.320674	-1.121
CG14718	0	0	0
CG14721	0.249284	-1.10106	0.851776
CG14722	-0.953278	-0.0876709	1.04095
CG14740	1.04234	-0.951456	-0.0908835
CG14757	0.35852	0.771317	-1.12984
CG14760	1.1547	-0.57735	-0.57735
CG14762	0	0	0
CG14763	-0.57735	-0.57735	1.1547
CG14764	1.09946	-0.244127	-0.855332
CG14767	1.0074	-0.0149608	-0.992436
CG14777	0.33341	-1.12411	0.790702
CG14778	0	0	0
CG14780	1.1547	-0.57735	-0.57735
CG14785	0.760144	0.37268	-1.13282
CG14787	-0.036234	1.01762	-0.981391
CG14797	1.1547	-0.57735	-0.57735
CG14803	-0.258222	1.10379	-0.845564
CG14805	-0.984366	-0.0305665	1.01493
CG14806	-0.683271	1.14777	-0.464501
CG14812	-0.29115	1.11326	-0.822115
CG14814	-0.552558	1.15435	-0.601792
CG14817	-1.07287	0.906187	0.16668
CG14818	0.634559	0.518185	-1.15274
CG14829	0	0	0
CG14830	0	0	0
CG14834	-0.988928	-0.0217885	1.01072
CG14855	0.216234	-1.09043	0.874193
CG14856	-0.796299	-0.326026	1.12233
CG1486	0.784758	0.341185	-1.12594
CG14860	0.397589	0.740057	-1.13765
CG14864	-0.57735	-0.57735	1.1547
CG14866	0	0	0
CG14868	1.1547	-0.57735	-0.57735
CG14879	-0.57735	-0.57735	1.1547
CG14881	0.602586	-1.15433	0.551741
CG14882	-1.14696	0.457863	0.689094
CG14883	-0.0711015	1.03365	-0.962552
CG14894	-0.978881	-0.0409777	1.01986
CG14903	-1.11458	0.295984	0.818597
CG14906	-0.935879	-0.117806	1.05368
CG14907	-0.576042	-0.578658	1.1547
CG1492	-0.693799	1.14626	-0.452464
CG14921	1.04557	-0.947157	-0.0984087
CG14926	-0.57735	1.1547	-0.57735
CG14931	0	0	0
CG14932	1.1547	-0.57735	-0.57735
CG14937	-0.852515	-0.248216	1.10073
CG1494	0.728993	0.411021	-1.14001
CG14957	0.0902944	0.951791	-1.04209
CG14961	-0.933189	-0.122361	1.05555
CG14963	0.729809	0.410037	-1.13985
CG14964	1.1547	-0.57735	-0.57735
CG14965	0.209691	0.878527	-1.08822
CG14966	0.291978	0.821514	-1.11349
CG14968	-0.57735	1.1547	-0.57735
CG14969	0.0896668	0.952147	-1.04181
CG14971	0.0734461	0.961252	-1.0347
CG14974	0	0	0
CG14977	-1.08522	0.884266	0.20095
CG14984	0	0	0
CG14985	-0.711117	-0.432309	1.14343
CG14989	-0.57735	-0.57735	1.1547
CG14990	0.266335	0.839868	-1.1062
CG14995	-0.999165	-0.00166817	1.00083
CG14997	-0.988034	1.01155	-0.0235167
CG15011	0.797245	0.324772	-1.12202
CG15012	-0.863435	-0.232255	1.09569
CG15014	-0.977185	-0.0441664	1.02135
CG15019	-0.827936	-0.283092	1.11103
CG15027	-0.90439	-0.169544	1.07393
CG1503	1.03461	-0.0732467	-0.961363
CG15034	-0.57735	1.1547	-0.57735
CG15035	0	0	0
CG15040	-1.03004	0.966973	0.0630676
CG15043	-0.945486	1.0468	-0.101315
CG15073	0.768633	0.361942	-1.13058
CG15080	-0.57735	1.1547	-0.57735
CG15083	0.46649	0.681517	-1.14801
CG15084	-0.95067	-0.0922658	1.04294
CG15093	1.14501	-0.443209	-0.701799
CG15097	-0.336021	-0.788711	1.12473
CG15098	0.512954	0.639436	-1.15239
CG15099	0.771093	0.358807	-1.1299
CG15107	-0.61596	1.15382	-0.53786
CG15109	-0.57735	1.1547	-0.57735
CG15111	0.491341	0.659281	-1.15062
CG15117	1.13399	-0.378451	-0.755539
CG15118	0.121572	0.933656	-1.05523
CG15120	-0.57735	-0.57735	1.1547
CG15127	0	0	0
CG15128	-0.57735	1.1547	-0.57735
CG1513	-0.12398	-0.932229	1.05621
CG15136	-0.57735	1.1547	-0.57735
CG15141	0.778065	0.34986	-1.12792
CG15142	-0.736627	1.1384	-0.401774
CG15143	0	0	0
CG15144	-0.57735	-0.57735	1.1547
CG15145	0	0	0
CG15147	0	0	0
CG15160	0.145449	0.91931	-1.06476
CG15168	-0.639404	1.15239	-0.512988
CG15170	-0.57735	1.1547	-0.57735
CG15172	1.15054	-0.660046	-0.490498
CG15177	-0.57735	1.1547	-0.57735
CG15186	-0.57735	-0.57735	1.1547
CG15196	-0.57735	-0.57735	1.1547
CG15199	-0.872384	1.09133	-0.218948
CG15200	0.795639	0.3269	-1.12254
CG15201	-1.1213	0.799413	0.321892
CG15202	0.628059	0.525111	-1.15317
CG15209	0.263744	0.841693	-1.10544
[truncated: 8,393 more rows]

## Sheet: PM5
gene	Unwouned_AverageExpression	Wounded_AverageExpression	Wasp inf. 24h_AverageExpression
128up	-0.883658	-0.20188	1.08554
14-3-3epsilon	-0.400585	-0.737604	1.13819
14-3-3zeta	-0.460786	-0.686535	1.14732
140up	0.598564	0.555873	-1.15444
18SrRNA-Psi:CR41602	-0.938165	-0.113913	1.05208
18SrRNA-Psi:CR45861	0.534412	0.619249	-1.15366
18SrRNA:CR41548	0.676196	0.4725	-1.1487
18SrRNA:CR45838	0.667622	0.4821	-1.14972
18SrRNA:CR45841	0.665824	0.4841	-1.14992
18w	0	0	0
26-29-p	0.588575	0.566052	-1.15463
28SrRNA-Psi:CR40596	0.39196	0.744645	-1.13661
28SrRNA-Psi:CR40741	0.756694	0.377008	-1.1337
28SrRNA-Psi:CR41609	0.574538	0.580158	-1.1547
28SrRNA-Psi:CR45848	0.687153	0.460081	-1.14723
28SrRNA-Psi:CR45851	0.719543	0.422337	-1.14188
28SrRNA-Psi:CR45853	1.05002	-0.108959	-0.941059
28SrRNA-Psi:CR45855	-0.682925	-0.464894	1.14782
28SrRNA-Psi:CR45859	-0.573785	-0.580908	1.15469
28SrRNA-Psi:CR45860	0.956189	0.0825096	-1.0387
28SrRNA-Psi:CR45862	0.991309	0.0171618	-1.00847
28SrRNA:CR45837	0.580233	0.574463	-1.1547
28SrRNA:CR45844	0.689256	0.457678	-1.14693
312	-0.870529	-0.221724	1.09225
4E-T	0.273487	0.834803	-1.10829
5-HT1A	0	0	0
5.8SrRNA-Psi:CR45849	1.0428	-0.0919523	-0.950848
5.8SrRNA-Psi:CR45854	-0.57735	-0.57735	1.1547
5.8SrRNA-Psi:CR45857	0	0	0
5.8SrRNA-Psi:CR45863	-0.57735	-0.57735	1.1547
5.8SrRNA:CR40454	0	0	0
5.8SrRNA:CR45839	0	0	0
5.8SrRNA:CR45842	0	0	0
5.8SrRNA:CR45852	0	0	0
5PtaseI	-0.832648	1.10916	-0.276512
7B2	0	0	0
7SLRNA:CR32864	1.1547	-0.57735	-0.57735
7SLRNA:CR42652	1.1547	-0.57735	-0.57735
a	0.367945	0.7639	-1.13185
A16	0.596638	-1.15448	0.557846
a6	-0.117108	1.0534	-0.93629
AANAT1	1.10731	-0.270093	-0.837212
AANATL2	-0.428381	1.14283	-0.714447
Aasdh	0.356059	0.773241	-1.1293
Aatf	-0.720107	-0.421665	1.14177
aay	-0.448142	1.14569	-0.697545
ab	1.07496	-0.172309	-0.902649
ABCA	-0.124317	1.05635	-0.932029
ABCB7	-0.943445	-0.104848	1.04829
ABCD	-0.248036	1.10067	-0.852639
abd-A	-0.57735	1.1547	-0.57735
Abd-B	-0.57735	-0.57735	1.1547
Abi	0.289528	0.823291	-1.11282
Abl	0.871618	0.220096	-1.09171
abo	1.15301	-0.522345	-0.630661
Abp1	0.653719	0.497452	-1.15117
abs	-1.02404	0.0499471	0.97409
Ac13E	-0.61083	1.15404	-0.543211
Ac3	-0.57735	1.1547	-0.57735
Ac76E	-0.74859	-0.387092	1.13568
Ac78C	-0.924649	-0.136649	1.0613
Acbp1	-0.873889	-0.21669	1.09058
Acbp2	0.841047	0.264662	-1.10571
Acbp3	-0.59891	-0.555518	1.15443
Acbp4	1.08772	-0.879491	-0.208229
Acbp5	1.15446	-0.556816	-0.597644
Acbp6	1.15459	-0.591254	-0.563334
ACC	1.14519	-0.444498	-0.70069
AcCoAS	-0.0115609	-0.994169	1.00573
Ace	-0.812598	1.11677	-0.304167
Acer	0.534882	0.618801	-1.15368
Acf	0.0512565	0.973386	-1.02464
achi	-0.419591	1.14144	-0.721847
acj6	-0.57735	1.1547	-0.57735
Ack	0.287456	0.824789	-1.11225
Ack-like	-0.805376	-0.31392	1.1193
Acn	-0.673806	-0.475186	1.14899
Acox57D-d	0.516686	0.635959	-1.15265
Acox57D-p	0.627097	0.526131	-1.15323
Acp95EF	0.565494	0.589126	-1.15462
Acph-1	0.816851	0.298374	-1.11523
Acsl	-0.749537	1.13546	-0.38592
Act42A	-1.11916	0.313407	0.805758
Act57B	1.03641	-0.0772968	-0.959109
Act5C	0.856484	0.242449	-1.09893
Act79B	1.1547	-0.57735	-0.57735
Act87E	-0.57735	1.1547	-0.57735
Act88F	-0.57735	-0.57735	1.1547
Actbeta	0.32576	0.7965	-1.12226
Actn	1.00862	-0.0174666	-0.991152
ACXD	0.800278	0.320739	-1.12102
Acyp2	-0.90395	-0.170244	1.07419
Ada	-0.435285	-0.708584	1.14387
Ada1-1	-0.872075	1.09149	-0.219413
Ada1-2	-1.14969	0.667912	0.481776
Ada2a	-0.69357	-0.452728	1.1463
Ada2b	1.08283	-0.888711	-0.194116
Ada3	0.552367	0.601978	-1.15435
AdamTS-A	-0.405628	-0.733455	1.13908
AdamTS-B	0	0	0
Adar	-0.354329	1.12892	-0.774591
Adat1	-0.154509	1.06826	-0.913753
Adck1	0.599198	0.555223	-1.15442
Adck5	-0.402874	1.1386	-0.735723
ADD1	-0.83536	1.10806	-0.272705
AdenoK	0.181186	0.89702	-1.07821
Adf1	-0.914386	-0.153481	1.06787
Adgf-A	-0.621725	-0.531808	1.15353
Adgf-A2	-0.57735	1.1547	-0.57735
Adh	0.451147	0.694942	-1.14609
Adhr	0.237408	0.859931	-1.09734
Adi1	-0.922723	-0.139835	1.06256
AdipoR	-0.712373	-0.430829	1.1432
Adk1	0.102801	0.944628	-1.04743
Adk2	-0.749747	-0.385659	1.13541
Adk3	0.753449	0.381059	-1.13451
AdoR	0	0	0
adp	1.06367	-0.142655	-0.921012
AdSL	-1.04289	0.0921585	0.950731
AdSS	-0.700112	-0.445169	1.14528
Aduk	-1.10697	0.268953	0.838019
Ady43A	0.876781	0.212333	-1.08911
Aef1	-0.528865	-0.624514	1.15338
aft	0.625945	0.527352	-1.1533
Afti	0.85317	0.247266	-1.10044
Ag5r	1.1547	-0.57735	-0.57735
Ag5r2	1.1547	-0.57735	-0.57735
AGBE	-0.104539	-0.943624	1.04816
AgmNAT	1.15454	-0.56083	-0.593715
ago	0.527975	0.625356	-1.15333
AGO1	0.391832	0.744749	-1.13658
AGO2	-0.903003	1.07475	-0.171747
AGO3	0.49413	0.656747	-1.15088
Agpat1	1.1537	-0.53529	-0.618413
Agpat2	1.1255	-0.339285	-0.786215
Agpat3	-1.11779	0.809701	0.308092
Agpat4	0.504094	-1.15172	0.647629
agt	0.761565	0.370892	-1.13246
Ahcy	0.534355	0.619304	-1.15366
AhcyL1	-0.714774	1.14277	-0.427994
AIF	-0.485707	1.15008	-0.664377
AIMP1	-0.370556	-0.761831	1.13239
AIMP2	-1.15382	0.537818	0.616
AIMP3	-0.859164	-0.238534	1.0977
Ak6	-0.238378	-0.85927	1.09765
Akap200	-0.761435	-0.371056	1.13249
Akh	-0.57735	-0.57735	1.1547
akirin	0.0502994	-1.0242	0.973901
Akt1	0.99475	0.0104191	-1.00517
Aladin	-0.785813	1.12562	-0.33981
AlaRS	0.717758	0.424459	-1.14222
AlaRS-m	0.867893	0.225653	-1.09355
Alas	-0.147298	1.06548	-0.918181
alc	0.640307	0.512016	-1.15232
Ald1	0.420272	0.721276	-1.14155
Aldh	1.10849	-0.834315	-0.274173
Aldh-III	0.221181	0.870893	-1.09207
Aldh7A1	-0.441767	-0.703038	1.14481
Alg-2	-1.03653	0.0775828	0.958949
Alg1	1.11008	-0.279746	-0.830336
Alg10	-0.66075	-0.48972	1.15047
Alg11	-0.689738	-0.457126	1.14686
Alg14	-1.0541	0.93528	0.118823
Alg2	-0.953784	-0.0867764	1.04056
Alg3	0.791978	0.331732	-1.12371
Alg9	-1.12844	0.776279	0.35216
Alh	-0.620148	-0.533468	1.15362
alien	-0.759973	-0.372895	1.13287
ALiX	0.588535	0.566093	-1.15463
Alk	-0.57735	-0.57735	1.1547
AlkB	-0.284218	-0.827125	1.11134
Alp12	0.70935	0.434386	-1.14374
alph	-0.653088	-0.498142	1.15123
alpha-Cat	-0.978217	1.02044	-0.0422278
alpha-Est1	0.88189	0.204581	-1.08647
alpha-Est10	-0.0404085	1.01959	-0.979183
alpha-Est3	1.11104	-0.283144	-0.827898
alpha-Est4	-0.445454	1.14532	-0.699866
alpha-Est5	1.1547	-0.57735	-0.57735
alpha-Est7	0.713018	0.430068	-1.14309
alpha-Est8	-0.519794	-0.633053	1.15285
alpha-Est9	1.12637	-0.783336	-0.343035
alpha-Man-Ia	0.52976	0.623667	-1.15343
alpha-Man-Ib	0.257936	0.845764	-1.1037
alpha-Man-Ic	-0.65469	1.15108	-0.496388
alpha-Man-IIa	0.57687	0.577831	-1.1547
alpha-Man-IIb	-0.613316	-0.540622	1.15394
alpha-PheRS	-0.943264	-0.105161	1.04842
alpha-Spec	0.836749	0.270747	-1.1075
alpha4GT1	0.0124512	0.993716	-1.00617
alphaCOP	0.37547	0.757922	-1.13339
alphaSnap	-0.573876	1.15469	-0.580818
alphaTub67C	-0.57735	1.1547	-0.57735
alphaTub84B	-0.866155	-0.228233	1.09439
alphaTub84D	1.02478	-0.97322	-0.0515647
alphaTub85E	-0.295192	1.11437	-0.819175
Alr	0.739758	0.397955	-1.13771
Als2	0.548428	0.605797	-1.15423
alt	-0.698886	-0.44659	1.14548
Ama	0.524512	0.628623	-1.15313
Amacr	0.493209	0.657585	-1.15079
amn	0.552216	0.602125	-1.15434
amon	1.1547	-0.57735	-0.57735
AMPdeam	-0.817065	-0.298082	1.11515
Amph	-0.921693	1.06323	-0.141534
AMPKalpha	0.119764	0.934725	-1.05449
Amun	1.13628	-0.390226	-0.746052
amx	-0.356824	1.12947	-0.772644
ana	0	0	0
ana1	1.02249	-0.0466131	-0.975878
ana2	1.1136	-0.821215	-0.29239
ana3	0.498968	0.652332	-1.1513
Ance	-0.538538	-0.615311	1.15385
Ance-2	-0.48853	-0.661827	1.15036
Ance-3	0.746137	0.390122	-1.13626
Ance-4	-0.702616	-0.442259	1.14487
Ance-5	0.704936	0.439554	-1.14449
anchor	0.325499	0.796697	-1.1222
angel	-1.0505	0.110118	0.940383
Ank	0.0159058	0.991952	-1.00786
Ank2	-1.10608	0.2659	0.840175
Ankle2	0.45184	0.694341	-1.14618
anne	-1.14347	0.432634	0.71084
anox	0.0803226	-1.03774	0.957416
Ant2	-0.738178	-0.399884	1.13806
antdh	-0.57735	1.1547	-0.57735
Antp	-0.57735	-0.57735	1.1547
antr	0.663365	0.486828	-1.15019
AnxB10	0.635094	0.517613	-1.15271
AnxB11	-1.06868	0.913082	0.155595
AnxB9	-1.03284	0.0692932	0.963551
aop	-0.623418	-0.530023	1.15344
aos	0	0	0
Aos1	-0.96282	-0.0706173	1.03344
AOX1	0.823763	0.288875	-1.11264
AOX3	0.79186	0.331888	-1.12375
ap	0	0	0
AP-1-2beta	0.649844	0.501683	-1.15153
AP-1gamma	-0.46743	1.14812	-0.680688
AP-1mu	0.48784	0.662451	-1.15029
AP-1sigma	-1.13027	0.36054	0.769734
AP-2alpha	0.143771	0.920333	-1.0641
AP-2mu	0.524044	0.629063	-1.15311
AP-2sigma	-0.957153	1.03795	-0.0807923
Apc	0.545333	0.608787	-1.15412
APC10	0.194378	0.888541	-1.08292
Apc2	0.301927	0.814247	-1.11617
APC4	0.992713	-1.00713	0.0144184
ApepP	0.126008	0.931024	-1.05703
Apf	-1.10488	0.261885	0.842999
aph-1	-0.170878	-0.903551	1.07443
aPKC	0.124434	0.93196	-1.05639
Apl	0.542674	0.611346	-1.15402
Aplip1	-0.57735	-0.57735	1.1547
apolpp	1.06532	-0.1469	-0.918425
Apoltp	0.9868	0.0258978	-1.0127
app	-1.07899	0.183348	0.895639
APP-BP1	-1.12237	0.796152	0.326222
Appl	0.984625	0.0300721	-1.0147
Aprt	-0.631719	-0.521218	1.15294
Aps	-1.13508	0.383977	0.751103
apt	-0.738906	-0.398996	1.1379
aqz	-0.492537	-0.658196	1.15073
ara	-0.57735	-0.57735	1.1547
aralar1	1.11733	-0.811018	-0.30631
Arc1	-0.974234	-0.0496804	1.02391
Arc2	-0.545508	-0.608618	1.15413
Arc42	-1.01541	0.983846	0.031561
Archease	0.754982	0.379147	-1.13413
Arf102F	-0.927379	-0.13211	1.05949
Arf51F	-0.0170768	-0.991352	1.00843
Arf79F	-0.744894	1.13655	-0.391654
ArfGAP1	0.712202	0.431031	-1.14323
ArfGAP3	-0.396395	1.13743	-0.741033
Arfip	-0.406726	-0.732549	1.13927
Arfrp1	-1.12247	0.326626	0.795846
arg	0.699114	0.446326	-1.14544
Argk	1.14418	-0.437433	-0.706751
Argl	-1.12342	0.792905	0.330511
ArgRS	0.612851	0.541106	-1.15396
ArgRS-m	0.945247	0.10173	-1.04698
ari-1	-0.644767	-0.507199	1.15197
ari-2	0.325822	0.796453	-1.12228
Arl1	0.299941	-1.11564	0.815703
Arl2	-0.421639	-0.720129	1.14177
Arl4	-0.525133	-0.628039	1.15317
Arl5	-0.695094	-0.450973	1.14607
Arl6	1.15328	-0.626261	-0.527017
Arl6IP1	1.15437	-0.553264	-0.601106
Arl8	0.56438	0.590224	-1.1546
arm	0.578376	0.576324	-1.1547
armi	0.120584	0.93424	-1.05482
Arp1	0.461962	0.685503	-1.14747
Arp10	0.432411	0.71103	-1.14344
Arp2	0.12299	0.932817	-1.05581
Arp3	-0.754225	-0.380092	1.13432
Arp5	-0.0172859	1.00853	-0.991245
Arp53D	0	0	0
Arp6	-0.746402	-0.389795	1.1362
Arp8	0.544986	0.60912	-1.15411
Arpc1	0.612935	0.541019	-1.15395
Arpc2	-0.384016	-0.751072	1.13509
Arpc3A	-1.03351	0.0707765	0.962731
Arpc3B	-0.658487	-0.492216	1.1507
Arpc4	-0.772435	-0.357091	1.12953
Arpc5	-0.659827	-0.49074	1.15057
arr	-0.12768	1.05771	-0.930028
Ars2	-0.725389	-0.415353	1.14074
Art1	-0.895495	1.07907	-0.183574
Art3	-1.07213	0.164721	0.907412
Art4	0.226179	0.867539	-1.09372
Art7	-1.09511	0.23045	0.864658
Art8	-0.441243	-0.703488	1.14473
Arts	0.264037	0.841487	-1.10552
aru	-1.06726	0.151906	0.915356
Arv1	1.15469	-0.573495	-0.581197
arx	-0.684445	-0.463167	1.14761
Asap	0.587047	0.567599	-1.15465
Asator	0.989155	0.021348	-1.0105
Asciz	-0.719031	1.14198	-0.422946
asf1	0.626496	0.526768	-1.15326
ash1	0.224945	0.868369	-1.09331
ash2	0.878072	0.210381	-1.08845
Ask1	0.514117	0.638354	-1.15247
asl	-0.907781	1.07191	-0.16413
AsnRS	0.47308	0.67568	-1.14876
AsnRS-m	-1.15085	0.493789	0.657058
AsnS	0.302706	0.813674	-1.11638
asp	-0.185296	1.07969	-0.894393
Asph	1.15459	-0.591333	-0.563254
ASPP	0	0	0
AspRS	0.23316	0.862821	-1.09598
AspRS-m	1.01846	-0.0379966	-0.98046
asrij	-0.703934	-0.440723	1.14466
asRNA:ASTR	1.07939	-0.894921	-0.18447
asRNA:CR17025	-0.57735	-0.57735	1.1547
asRNA:CR31144	-0.64833	-0.503332	1.15166
asRNA:CR31514	0.748019	0.387798	-1.13582
asRNA:CR31912	-0.57735	-0.57735	1.1547
asRNA:CR32252	0	0	0
asRNA:CR33945	0	0	0
asRNA:CR42254	1.14247	-0.426079	-0.716392
asRNA:CR42547	-0.57735	-0.57735	1.1547
asRNA:CR42738	-1.01697	0.982119	0.0348506
asRNA:CR42871	0.625203	0.528137	-1.15334
asRNA:CR43152	0	0	0
asRNA:CR43159	-1.05268	0.937319	0.115356
asRNA:CR43257	-0.339189	-0.786289	1.12548
asRNA:CR43425	0.89468	0.184847	-1.07953
asRNA:CR43426	-0.57735	1.1547	-0.57735
asRNA:CR43460	-0.57735	-0.57735	1.1547
asRNA:CR43463	0	0	0
asRNA:CR43465	-0.758812	1.13317	-0.374353
asRNA:CR43466	-0.57735	-0.57735	1.1547
asRNA:CR43468	-0.34558	-0.781375	1.12696
asRNA:CR43474	-0.57735	-0.57735	1.1547
asRNA:CR43476	0	0	0
asRNA:CR43480	0	0	0
asRNA:CR43481	-0.57735	1.1547	-0.57735
asRNA:CR43629	-0.535992	1.15374	-0.617743
asRNA:CR43637	-0.57735	1.1547	-0.57735
asRNA:CR43683	-0.57735	-0.57735	1.1547
asRNA:CR43723	1.07032	-0.91041	-0.159909
asRNA:CR43730	0.162066	0.909069	-1.07113
asRNA:CR43767	-0.737288	1.13826	-0.40097
asRNA:CR43786	-0.57735	-0.57735	1.1547
asRNA:CR43787	0.589755	0.564856	-1.15461
asRNA:CR43809	0.218369	0.872771	-1.09114
asRNA:CR43812	0.956337	0.0822464	-1.03858
asRNA:CR43824	0	0	0
asRNA:CR43833	0.557203	0.597266	-1.15447
asRNA:CR43864	-1.13382	0.37761	0.756212
asRNA:CR43868	1.006	-0.0121193	-0.993885
asRNA:CR43875	0.862145	0.234157	-1.0963
asRNA:CR43889	-0.586789	-0.567859	1.15465
asRNA:CR43906	0.583822	0.570855	-1.15468
asRNA:CR43916	1.02697	-0.0563204	-0.97065
asRNA:CR43933	-0.439792	1.14452	-0.704732
asRNA:CR43944	-0.620337	1.15361	-0.533269
asRNA:CR43957	0.620621	0.53297	-1.15359
asRNA:CR43964	0.0936314	0.949891	-1.04352
asRNA:CR43981	-0.767485	1.13089	-0.363402
asRNA:CR44019	0	0	0
asRNA:CR44021	0.53963	0.614267	-1.1539
asRNA:CR44029	0.387037	0.748634	-1.13567
asRNA:CR44030	-0.776857	-0.351417	1.12827
asRNA:CR44031	0.539889	0.614018	-1.15391
asRNA:CR44045	-0.57735	1.1547	-0.57735
asRNA:CR44046	0	0	0
asRNA:CR44047	1.1547	-0.57735	-0.57735
asRNA:CR44049	0	0	0
asRNA:CR44053	1.14087	-0.416144	-0.724729
asRNA:CR44054	0.964939	0.0667757	-1.03171
asRNA:CR44064	0.477451	0.671785	-1.14924
asRNA:CR44065	1.15247	-0.63836	-0.51411
asRNA:CR44067	-1.0914	0.219144	0.872254
asRNA:CR44069	-0.57735	-0.57735	1.1547
asRNA:CR44093	-0.74384	1.13679	-0.39295
asRNA:CR44095	0.810561	0.30693	-1.11749
asRNA:CR44114	-0.909278	-0.161729	1.07101
asRNA:CR44116	0	0	0
asRNA:CR44119	-0.841223	-0.264412	1.10564
asRNA:CR44124	1.1547	-0.57735	-0.57735
asRNA:CR44134	1.14146	-0.41973	-0.72173
asRNA:CR44137	-0.57735	-0.57735	1.1547
asRNA:CR44147	-0.646119	1.15185	-0.505733
asRNA:CR44160	0.770014	-1.1302	0.360183
asRNA:CR44168	-0.12996	1.05863	-0.928666
asRNA:CR44169	0.747574	0.388348	-1.13592
asRNA:CR44176	-0.57735	-0.57735	1.1547
asRNA:CR44179	0.17181	0.902964	-1.07477
asRNA:CR44182	0	0	0
asRNA:CR44201	0.207225	-1.08738	0.880152
asRNA:CR44224	-1.13633	0.745829	0.390502
asRNA:CR44228	-0.57735	1.1547	-0.57735
asRNA:CR44266	0.967185	0.0626817	-1.02987
asRNA:CR44267	0.0684644	0.964009	-1.03247
asRNA:CR44291	-0.0995992	1.04607	-0.946473
asRNA:CR44321	-0.57735	-0.57735	1.1547
asRNA:CR44340	-0.78263	1.12658	-0.343952
asRNA:CR44367	-0.482853	1.1498	-0.666946
asRNA:CR44368	1.12605	-0.341628	-0.784418
asRNA:CR44370	-0.57735	-0.57735	1.1547
asRNA:CR44372	-0.57735	-0.57735	1.1547
asRNA:CR44374	0.849841	0.252078	-1.10192
asRNA:CR44375	1.1547	-0.57735	-0.57735
asRNA:CR44381	-1.10903	0.276063	0.832969
asRNA:CR44382	-0.220579	1.09187	-0.871295
asRNA:CR44386	1.09688	-0.860924	-0.235952
asRNA:CR44390	1.13574	-0.38741	-0.748333
asRNA:CR44416	0	0	0
asRNA:CR44429	-0.863078	-0.232782	1.09586
asRNA:CR44431	-0.477726	1.14927	-0.67154
asRNA:CR44512	-0.57735	1.1547	-0.57735
asRNA:CR44599	-0.882658	1.08607	-0.203409
asRNA:CR44600	0	0	0
asRNA:CR44690	-0.947914	1.045	-0.09709
asRNA:CR44703	-0.57735	-0.57735	1.1547
asRNA:CR44704	-0.397843	1.13769	-0.739849
asRNA:CR44724	0	0	0
asRNA:CR44793	1.08738	-0.207245	-0.880139
asRNA:CR44806	-0.457443	-0.689461	1.1469
asRNA:CR44807	-0.57735	1.1547	-0.57735
asRNA:CR44841	1.00278	-0.0055768	-0.9972
asRNA:CR44843	-0.944059	-0.103787	1.04785
asRNA:CR44849	1.03769	-0.0802051	-0.957482
asRNA:CR44872	-0.0794299	1.03735	-0.957916
asRNA:CR44891	0	0	0
asRNA:CR44892	-0.57735	-0.57735	1.1547
asRNA:CR44910	-0.57735	-0.57735	1.1547
asRNA:CR44911	-0.57735	-0.57735	1.1547
asRNA:CR44959	-0.823121	-0.289762	1.11288
asRNA:CR44960	0.956722	0.0815606	-1.03828
asRNA:CR44961	-0.57735	-0.57735	1.1547
asRNA:CR44962	1.00636	-0.0128346	-0.993521
asRNA:CR44968	-0.57735	-0.57735	1.1547
asRNA:CR44969	0.00508528	0.997448	-1.00253
asRNA:CR44972	0	0	0
asRNA:CR44976	-0.516811	-0.635843	1.15265
asRNA:CR44981	-0.57735	-0.57735	1.1547
asRNA:CR44982	-0.57735	1.1547	-0.57735
asRNA:CR44987	0.977632	0.0433269	-1.02096
asRNA:CR44989	0	0	0
asRNA:CR44992	0	0	0
asRNA:CR44996	-0.57735	-0.57735	1.1547
asRNA:CR44998	-0.542369	1.15401	-0.611639
asRNA:CR45000	0.757131	-1.13359	0.376461
asRNA:CR45007	0.604844	0.549412	-1.15426
asRNA:CR45009	0.10446	-1.04813	0.94367
asRNA:CR45026	-1.04483	0.948141	0.0966943
asRNA:CR45028	0.552016	0.602319	-1.15434
asRNA:CR45044	0.94366	0.104476	-1.04814
asRNA:CR45053	0.660992	0.489453	-1.15045
asRNA:CR45108	0	0	0
asRNA:CR45124	-0.936281	-0.117123	1.0534
asRNA:CR45126	0.578488	0.576211	-1.1547
asRNA:CR45129	-0.57735	1.1547	-0.57735
asRNA:CR45131	-0.57735	-0.57735	1.1547
asRNA:CR45132	0	0	0
asRNA:CR45135	-0.57735	-0.57735	1.1547
asRNA:CR45136	-0.572949	-0.58174	1.15469
asRNA:CR45139	0.724776	0.416088	-1.14086
asRNA:CR45140	-0.421904	-0.719906	1.14181
asRNA:CR45141	0.168394	0.905112	-1.07351
asRNA:CR45142	0.885119	0.199642	-1.08476
asRNA:CR45145	1.13477	-0.752394	-0.382373
asRNA:CR45149	0	0	0
asRNA:CR45160	0.497896	0.653313	-1.15121
asRNA:CR45163	-0.169654	1.07397	-0.904321
asRNA:CR45164	0.89442	0.185253	-1.07967
asRNA:CR45171	0.712496	0.430684	-1.14318
asRNA:CR45175	1.02897	-0.0607047	-0.968265
asRNA:CR45182	-0.57735	-0.57735	1.1547
asRNA:CR45185	0	0	0
asRNA:CR45189	-0.57735	-0.57735	1.1547
asRNA:CR45190	0.165837	0.906714	-1.07255
asRNA:CR45195	-0.155722	1.06873	-0.913003
asRNA:CR45198	1.15342	-0.52968	-0.623743
asRNA:CR45202	-0.57735	-0.57735	1.1547
asRNA:CR45208	0.842195	-1.10523	0.26303
asRNA:CR45210	-0.57735	1.1547	-0.57735
asRNA:CR45214	0.735381	0.40329	-1.13867
asRNA:CR45264	0.444275	0.700882	-1.14516
asRNA:CR45272	-0.57735	-0.57735	1.1547
asRNA:CR45275	0.88143	0.205281	-1.08671
asRNA:CR45281	-1.06724	0.91539	0.15185
asRNA:CR45326	0	0	0
asRNA:CR45350	0.572121	0.582564	-1.15468
asRNA:CR45366	0	0	0
asRNA:CR45367	0.0413554	0.978681	-1.02004
asRNA:CR45396	-0.601329	-0.553035	1.15436
asRNA:CR45397	1.05652	-0.124752	-0.931771
asRNA:CR45445	-0.57735	-0.57735	1.1547
asRNA:CR45466	-1.11592	0.300961	0.814956
asRNA:CR45467	-0.57735	-0.57735	1.1547
asRNA:CR45468	-0.64546	1.15191	-0.506447
asRNA:CR45479	-0.57735	-0.57735	1.1547
asRNA:CR45485	-0.57735	1.1547	-0.57735
asRNA:CR45501	-0.592689	-0.561875	1.15456
asRNA:CR45518	-0.57735	-0.57735	1.1547
asRNA:CR45520	1.14107	-0.417318	-0.723749
asRNA:CR45528	0.984173	0.030937	-1.01511
asRNA:CR45549	-0.898032	-0.179597	1.07763
asRNA:CR45600	-0.0122757	1.00608	-0.993806
asRNA:CR45604	0.659394	0.491217	-1.15061
asRNA:CR45612	0	0	0
asRNA:CR45620	1.14566	-0.697719	-0.447941
asRNA:CR45682	0	0	0
asRNA:CR45683	-0.00167178	1.00083	-0.999163
asRNA:CR45686	1.03459	-0.0731985	-0.961389
asRNA:CR45713	0	0	0
asRNA:CR45714	-1.09793	0.239267	0.858663
asRNA:CR45778	0.472924	0.675819	-1.14874
asRNA:CR45789	0.0345986	0.982252	-1.01685
asRNA:CR45798	0.523688	0.629399	-1.15309
asRNA:CR45800	1.15167	-0.503428	-0.648242
asRNA:CR45804	-0.57735	-0.57735	1.1547
asRNA:CR45806	0.697117	0.448638	-1.14575
asRNA:CR45813	-0.57735	-0.57735	1.1547
asRNA:CR45814	0.991309	0.0171617	-1.00847
asRNA:CR45815	-0.57735	-0.57735	1.1547
asRNA:CR45818	0.455801	0.690895	-1.1467
asRNA:CR45822	-0.57735	-0.57735	1.1547
asRNA:CR45827	0	0	0
asRNA:CR45831	-0.57735	-0.57735	1.1547
asRNA:CR45835	-0.735688	-0.402917	1.1386
asRNA:CR45865	0.843801	0.260741	-1.10454
asRNA:CR45870	-0.845491	1.10382	-0.258326
asRNA:CR45871	-0.57735	-0.57735	1.1547
asRNA:CR45873	-0.699215	1.14542	-0.446209
asRNA:CR45874	1.00403	-0.995921	-0.00810788
asRNA:CR45875	-0.57735	1.1547	-0.57735
asRNA:CR45889	0.693995	0.452239	-1.14623
asRNA:CR45891	-0.57735	-0.57735	1.1547
asRNA:CR45892	-0.57735	1.1547	-0.57735
asRNA:CR45895	0.909659	0.161117	-1.07078
asRNA:CR45896	-0.57735	-0.57735	1.1547
asRNA:CR45907	1.13662	-0.7446	-0.392015
asRNA:CR45908	0	0	0
asRNA:CR45912	-0.57735	1.1547	-0.57735
asRNA:CR45925	-0.153005	1.06768	-0.91468
asRNA:CR45926	0.769281	0.361118	-1.1304
asRNA:CR45928	0.962514	0.0711695	-1.03368
asRNA:CR45929	1.05052	-0.110154	-0.940363
asRNA:CR45943	-1.15197	0.644758	0.507208
asRNA:CR45951	-0.57735	1.1547	-0.57735
asRNA:CR45952	-0.685411	-0.462067	1.14748
asRNA:CR45968	0.372292	0.760453	-1.13274
asRNA:CR45969	-0.57735	-0.57735	1.1547
asRNA:CR45970	0	0	0
asRNA:CR45999	0.548669	0.605564	-1.15423
asRNA:CR46018	-0.57735	1.1547	-0.57735
asRNA:CR46020	-0.57735	1.1547	-0.57735
asRNA:CR46029	0	0	0
asRNA:CR46033	-0.52274	-0.63029	1.15303
asRNA:CR46044	-1.0318	0.964831	0.0669715
asRNA:CR46048	-0.813889	1.1163	-0.302413
asRNA:CR46050	-0.57735	1.1547	-0.57735
asRNA:CR46055	-1.06787	0.153484	0.914385
asRNA:CR46067	0.390518	0.745816	-1.13633
asRNA:CR46081	0.282723	0.828201	-1.11092
asRNA:CR46089	-0.696064	-0.449854	1.14592
asRNA:CR46091	1.149	-0.475273	-0.673729
asRNA:CR46093	-0.57735	-0.57735	1.1547
asRNA:CR46096	0	0	0
asRNA:CR46097	0.912123	0.157147	-1.06927
asRNA:CR46099	-0.705609	-0.438768	1.14438
asRNA:CR46104	0.457356	0.689537	-1.14689
asRNA:CR46105	0	0	0
asRNA:CR46109	-0.57735	-0.57735	1.1547
asRNA:CR46133	0.226122	0.867577	-1.0937
asRNA:CR46134	1.15277	-0.518638	-0.634135
asRNA:CR46135	0.566549	0.588085	-1.15463
asRNA:CR46137	1.04334	-0.0932161	-0.950128
asRNA:CR46138	1.08804	-0.209161	-0.878877
asRNA:CR46140	1.09585	-0.232741	-0.863106
asRNA:CR46145	0	0	0
asRNA:CR46255	0.00620582	0.996883	-1.00309
asRNA:CR46262	0.86194	0.234458	-1.0964
asRNA:CR46354	0.46066	0.686645	-1.14731
ast	1.02261	-0.0468723	-0.97574
AstA	-0.279587	-0.830451	1.11004
AstA-R1	-0.83983	1.10622	-0.26639
asun	1.04116	-0.0881559	-0.953004
Asx	0.167783	0.905495	-1.07328
Atac1	-1.10621	0.839862	0.266345
Atac2	1.14941	-0.670313	-0.479098
Atac3	0.855976	0.24319	-1.09917
ATbp	-0.24817	1.10072	-0.852546
Ate1	0.906094	0.166828	-1.07292
Atet	0.449343	0.696506	-1.14585
Atf-2	1.08157	-0.890997	-0.190578
Atf3	1.08946	-0.21335	-0.876108
Atf6	-0.765196	-0.366305	1.1315
Atg1	0.181057	0.897102	-1.07816
Atg10	0.552484	0.601865	-1.15435
Atg101	0.260825	0.843742	-1.10457
Atg12	-1.1038	0.258279	0.845524
Atg13	0.803116	0.31695	-1.12007
Atg14	0.970759	0.0561188	-1.02688
Atg16	-0.346116	1.12708	-0.780962
Atg17	-1.0836	0.196329	0.887275
Atg18a	-1.11958	0.804535	0.315049
Atg18b	0.836433	0.271192	-1.10763
Atg2	0.810383	0.307171	-1.11755
Atg3	0.0204747	-1.01008	0.989605
Atg4a	1.11883	-0.312086	-0.80674
Atg4b	0.821162	0.292462	-1.11362
Atg5	1.10711	-0.837682	-0.269429
Atg6	-0.556442	1.15445	-0.598009
Atg7	0.485732	0.664354	-1.15009
Atg8a	-0.742992	-0.393992	1.13698
Atg8b	0	0	0
Atg9	0.941912	0.107491	-1.0494
atilla	-0.724395	-0.416544	1.14094
atk	0	0	0
atl	-0.05542	1.02656	-0.971138
atms	1.14779	-0.464692	-0.683103
Atox1	0.462848	0.684725	-1.14757
ATP6AP2	0.376848	0.756821	-1.13367
ATP7	0.808488	0.309731	-1.11822
ATP8A	0.0328047	0.983194	-1.016
ATP8B	0.125202	0.931503	-1.05671
Atpalpha	0.68762	0.459548	-1.14717
ATPCL	0.750548	0.384666	-1.13521
ATPsynB	0.462283	0.685221	-1.1475
ATPsynbeta	0.600546	0.553839	-1.15439
ATPsynbetaL	0	0	0
ATPsynC	-0.676034	-0.472682	1.14872
ATPsynCF6	0.528741	0.624632	-1.15337
ATPsynCF6L	1.1547	-0.57735	-0.57735
ATPsynD	0.654055	0.497084	-1.15114
ATPsyndelta	0.585454	0.569209	-1.15466
ATPsynE	-0.414066	-0.726462	1.14053
ATPsynepsilonL	-1.10939	0.277317	0.832074
ATPsynF	-0.730705	-0.408956	1.13966
ATPsynG	0.562386	0.592187	-1.15457
ATPsyngamma	0.652699	0.498567	-1.15127
ATPsynGL	1.1547	-0.57735	-0.57735
ATPsynO	0.59786	0.556595	-1.15445
AttA	-0.57735	-0.57735	1.1547
AttB	-0.624877	-0.528482	1.15336
AttC	-0.274685	1.10864	-0.833951
AttD	-0.531705	1.15353	-0.621822
Atu	-0.000942958	1.00047	-0.999528
Atx-1	-1.13351	0.376062	0.757449
Atx2	0.473539	0.675272	-1.14881
Atxn7	0.783502	0.34282	-1.12632
aub	-0.258343	1.10382	-0.845479
aurA	0.435516	0.708387	-1.1439
aurB	0.374698	0.758537	-1.13324
aust	0	0	0
aux	-0.0777804	1.03662	-0.958839
ave	-1.15021	0.486992	0.663217
Aven	-0.0506528	-0.973711	1.02436
awd	-0.588098	-0.566535	1.15463
Awh	-0.57735	1.1547	-0.57735
axed	0.176126	0.900236	-1.07636
Axn	-1.12434	0.789971	0.33437
Axs	0.68092	0.467166	-1.14809
Axud1	-1.09409	0.227327	0.866766
az2	0.869106	0.223847	-1.09295
b	1.02341	-0.0485813	-0.974824
B-H2	-0.57735	1.1547	-0.57735
B4	-1.05024	0.109502	0.940742
B52	-0.644955	-0.506995	1.15195
B9d1	0	0	0
bab1	0.849782	0.252163	-1.10195
bab2	0	0	0
babo	-0.719995	-0.421799	1.14179
babos	-0.57735	-0.57735	1.1547
Bacc	-0.475902	-0.673168	1.14907
baf	-0.816254	-0.29919	1.11544
bai	-0.782253	-0.344441	1.12669
Balat	-0.57735	-0.57735	1.1547
Baldspot	-0.193063	-0.889392	1.08245
ball	1.14962	-0.668511	-0.48111
bam	0.126105	0.930966	-1.05707
Bap111	0.703152	0.441635	-1.14479
Bap170	0.975776	0.0468042	-1.02258
Bap55	0.0293578	-1.01436	0.984998
Bap60	0.146817	0.918475	-1.06529
barc	-0.703745	-0.440944	1.14469
bark	-0.57735	-0.57735	1.1547
barr	-0.449816	1.14591	-0.696097
baz	0.843958	0.260517	-1.10448
bb8	-0.57735	-0.57735	1.1547
bbc	-0.806953	-0.311799	1.11875
bbg	-0.580274	-0.574422	1.1547
BBIP1	1.1547	-0.57735	-0.57735
BBS8	0.954002	0.0863906	-1.04039
bbx	0.998902	0.0021919	-1.00109
bc10	-0.361777	1.13054	-0.768763
BCAS2	-0.783695	-0.342568	1.12626
bchs	-1.15426	0.549583	0.604679
BCL7-like	0.492285	0.658424	-1.15071
bcn92	-0.868961	-0.224063	1.09302
Bdbt	-0.65949	-0.491111	1.1506
bdg	0.000551498	-1.00028	0.999724
bdl	-0.57735	1.1547	-0.57735
Bdp1	-0.787432	1.12513	-0.337696
be	-0.00941897	1.00468	-0.995257
BEAF-32	-0.141362	-0.921797	1.06316
beag	0.27276	0.83532	-1.10808
beat-Ib	0	0	0
beat-Ic	0	0	0
beat-IIIc	-0.707097	-0.437028	1.14412
beat-VI	0	0	0
beat-VII	0	0	0
beg	0.621476	0.532071	-1.15355
bel	-1.14459	0.704359	0.440227
Bem46	-0.159318	-0.910777	1.0701
ben	0.417921	0.723245	-1.14117
Best1	-0.546842	-0.60733	1.15417
Best2	-1.15434	0.552052	0.602284
Bet1	-1.00212	0.997871	0.0042437
Bet3	0.32214	0.799226	-1.12137
Bet5	-0.253772	-0.848665	1.10244
beta-Man	0.706139	0.438149	-1.14429
beta-PheRS	-1.15458	0.562846	0.591734
beta-Spec	0.725434	0.4153	-1.14073
beta'COP	0.436282	0.707734	-1.14402
beta3GalTII	-1.13356	0.757242	0.376322
beta4GalNAcTA	-0.630994	1.15298	-0.52199
beta4GalNAcTB	1.04433	-0.0955197	-0.948813
beta4GalT7	0.704839	0.439667	-1.14451
betaCOP	0.152195	0.915178	-1.06737
betaggt-I	-0.24043	1.0983	-0.857868
betaggt-II	0.598226	0.55622	-1.15445
betaGlu	0.827865	0.28319	-1.11105
betaTub56D	-1.08848	0.210464	0.878017
betaTub60D	-1.07754	0.179353	0.898187
betaTub85D	-0.935356	-0.118694	1.05405
betaTub97EF	-0.152214	-0.915166	1.06738
Bgb	1.12806	-0.777587	-0.350476
bgcn	-0.57735	1.1547	-0.57735
bgm	-0.548489	-0.605739	1.15423
BHD	-0.497954	1.15121	-0.65326
bi	0	0	0
BI-1	-0.466298	1.14798	-0.681687
bib	-0.57735	-0.57735	1.1547
bic	-0.400789	-0.737436	1.13822
BicD	-0.99481	-0.0103008	1.00511
bif	-0.112871	-0.938776	1.05165
BigH1	-0.57735	-0.57735	1.1547
bigmax	-0.811041	-0.30628	1.11732
Bin1	-1.03996	0.954559	0.0854038
bin3	-0.647163	-0.5046	1.15176
bip1	-0.789563	-0.334905	1.12447
bip2	-0.704003	-0.440643	1.14465
Bka	-0.994302	-0.0113	1.0056
blanks	1.1547	-0.57735	-0.57735
Blimp-1	0	0	0
Blm	0.375363	0.758007	-1.13337
Blos1	-0.459748	-0.687445	1.14719
Blos2	-0.744279	1.13669	-0.39241
Blos3	-0.348054	1.12752	-0.779463
Blos4	-0.818072	-0.296704	1.11478
blot	-0.57735	-0.57735	1.1547
blow	0.625857	0.527445	-1.1533
blp	1.14896	-0.674048	-0.474914
blw	-0.391741	-0.744823	1.13656
bma	1.08152	-0.190436	-0.891089
Bmcp	-1.1053	0.263271	0.842026
bmm	-0.693751	-0.452519	1.14627
bnb	0	0	0
bnl	-0.782269	1.12669	-0.34442
boca	-0.738431	-0.399576	1.13801
bocks	0.43863	0.705727	-1.14436
BOD1	0.956479	0.0819933	-1.03847
boi	0.768707	0.361848	-1.13056
bol	-1.15364	0.6197	0.533939
Bom1	-0.57735	1.1547	-0.57735
Bom3	0.514678	0.637831	-1.15251
bon	1.00527	-0.0106206	-0.994647
bond	-0.57735	-0.57735	1.1547
bonsai	-0.95583	-0.0831478	1.03898
bor	0.730192	0.409575	-1.13977
bora	1.15464	-0.587695	-0.566943
BORCS5	1.13336	-0.375312	-0.758048
BORCS6	0.315319	0.804333	-1.11965
BORCS7	1.15328	-0.527042	-0.626237
borr	0.328418	0.794492	-1.12291
botv	0.562636	0.59194	-1.15458
bou	0.977468	-1.0211	0.0436355
bowl	-0.690471	1.14676	-0.456286
BoYb	1.13687	-0.393402	-0.743472
br	0.604424	0.549846	-1.15427
Br140	0.691092	0.455574	-1.14667
brat	-0.801073	-0.31968	1.12075
Brca2	-0.449095	1.14582	-0.69672
Brd	1.1547	-0.57735	-0.57735
Brd8	1.11739	-0.810847	-0.306542
Bre1	0.684359	0.463264	-1.14762
Brf	-0.466478	1.14801	-0.681528
brk	0.388751	-1.136	0.747248
brm	0.0408725	0.978937	-1.01981
Brms1	-0.532133	1.15355	-0.621417
brn	-1.14951	0.669427	0.480088
brp	-0.57735	1.1547	-0.57735
bru1	-0.57735	1.1547	-0.57735
bru2	1.1547	-0.57735	-0.57735
bru3	0.670686	0.478681	-1.14937
Bruce	0.313441	0.805733	-1.11917
brun	0.800205	0.320837	-1.12104
brv3	0.152124	0.915222	-1.06735
BRWD3	1.12543	-0.338977	-0.786451
brwl	0.189599	0.891628	-1.08123
bs	-0.501062	1.15148	-0.650414
bsf	-0.0548028	1.02627	-0.971472
Bsg	0.60499	0.549262	-1.15425
Bsg25D	0.71749	0.424777	-1.14227
bsk	-0.557877	1.15448	-0.596607
bt	0.591625	0.562957	-1.15458
BTBD9	0.45453	0.692002	-1.14653
BtbVII	0.347091	0.780208	-1.1273
btd	0	0	0
BthD	1.12723	-0.780457	-0.346768
Btk29A	0.725227	0.415547	-1.14077
btl	1.12766	-0.348704	-0.77896
btsz	0.325115	0.796987	-1.1221
btz	0.698332	0.447232	-1.14556
Bub1	0.545842	0.608295	-1.15414
Bub3	-0.9807	-0.0375433	1.01824
BubR1	-0.0266288	1.01305	-0.98642
bug	0.199272	-1.08463	0.88536
Bug22	-0.867583	-0.226113	1.0937
BuGZ	0.123913	0.932269	-1.05618
bun	1.11305	-0.290366	-0.822683
bur	-0.934553	-0.120055	1.05461
bves	0.645394	0.506519	-1.15191
bw	1.13816	-0.400412	-0.737745
bwa	0.984456	0.0303958	-1.01485
Bx	0.208615	0.879237	-1.08785
Bx42	-1.15267	0.635572	0.517101
by	0.354569	0.774404	-1.12897
bys	-0.0656518	-0.965557	1.03121
c(2)M	1.02062	-0.0426019	-0.978018
c(3)G	-0.870145	-0.222298	1.09244
c11.1	0.0122624	0.993812	-1.00607
c12.1	-1.11803	0.309005	0.809026
c12.2	-0.750732	1.13517	-0.384437
C1GalTA	0.699965	0.445339	-1.1453
C3G	-0.530522	1.15347	-0.622945
ca	1.04761	-0.103234	-0.944379
Ca-alpha1D	-0.0737323	1.03483	-0.961093
Ca-alpha1T	-0.619753	-0.533883	1.15364
Ca-Ma2d	0	0	0
CaBP1	-0.47488	1.14896	-0.674079
cac	1.02602	-0.97177	-0.054252
cact	-0.572637	-0.582051	1.15469
cactin	0.744178	-1.13671	0.392535
Cad86C	-0.606242	-0.547969	1.15421
Cad87A	-0.211065	1.08868	-0.87762
Cad96Ca	-0.753932	1.13439	-0.380457
Cad99C	-0.57735	-0.57735	1.1547
CadN	-0.57735	-0.57735	1.1547
CadN2	0	0	0
Cadps	-0.0639967	1.03046	-0.966465
Caf1-105	-0.340602	1.12581	-0.785206
Caf1-180	1.08134	-0.189919	-0.891422
Caf1-55	0.630245	0.522787	-1.15303
cag	-1.01856	0.0382099	0.980347
CAH1	0.579479	0.575219	-1.1547
CAH13	1.1547	-0.57735	-0.57735
CAH2	-0.253503	1.10236	-0.848852
CAH3	0.172675	0.902418	-1.07509
CAH7	0.0736119	0.96116	-1.03477
CAHbeta	-0.336594	1.12487	-0.788274
cal1	1.14466	-0.703915	-0.440745
CalpA	0.760445	0.372302	-1.13275
CalpB	-0.195117	1.08318	-0.888062
CalpC	-1.14298	0.429351	0.713626
Calr	0.480421	0.669128	-1.14955
Cals	-0.960082	1.03563	-0.0755501
Calx	-1.15332	0.527719	0.625598
calypso	1.14888	-0.674695	-0.474188
Cam	-0.217594	-0.873288	1.09088
CaMKI	-0.912977	1.06874	-0.155765
CaMKII	-0.901111	-0.174744	1.07585
Camp	-0.335094	1.12451	-0.789419
Camta	0.842836	0.262117	-1.10495
can	0	0	0
cana	-0.615778	1.15383	-0.53805
CanA-14F	0.572616	0.582071	-1.15469
CanB	0	0	0
CanB2	0.469233	0.679093	-1.14833
Cand1	-0.507097	-0.644861	1.15196
CAP	-0.579016	-0.575683	1.1547
Cap-D2	0.36977	0.762455	-1.13222
Cap-D3	0.477237	0.671977	-1.14921
Cap-G	0.89409	0.185768	-1.07986
Cap-H2	0.332121	0.791683	-1.1238
Caper	0.367466	0.764279	-1.13174
Capr	-0.69249	1.14646	-0.45397
caps	0.222646	0.869912	-1.09256
capt	-0.572065	1.15468	-0.582619
capu	-1.09641	0.2345	0.861912
car	0.194421	0.888513	-1.08293
CARPB	1.15306	-0.523317	-0.629748
CarT	-0.085659	1.04007	-0.954415
CASK	0.30086	0.81503	-1.11589
casp	0.576696	-1.1547	0.578004
cass	0.238881	0.858926	-1.09781
Cat	0.277347	0.832053	-1.1094
cathD	0.528149	0.625192	-1.15334
Catsup	-0.549849	1.15427	-0.604421
caup	0	0	0
cav	1.12451	-0.789415	-0.335099
caz	0.32568	0.796561	-1.12224
cbc	-1.1458	0.696842	0.448955
Cbl	0.476812	0.672356	-1.14917
CBP	0.0526243	0.972649	-1.02527
Cbp20	-0.0304011	-0.984453	1.01485
Cbp53E	-0.57735	-0.57735	1.1547
Cbp80	0.934688	0.119825	-1.05451
cbs	-0.0970519	1.04499	-0.947936
Cbs	-0.465313	1.14787	-0.682556
cbt	0.837698	0.269407	-1.10711
Cby	-1.08858	0.877819	0.210764
Cc2d2a	1.01943	-0.979371	-0.040055
CCAP	1.1547	-0.57735	-0.57735
CCDC53	0.795928	0.326517	-1.12245
Ccdc56	-0.513395	-0.639025	1.15242
Ccdc58	-0.699662	-0.445691	1.14535
Ccdc85	0.944427	-1.04758	0.103151
CCHa2	1.14528	-0.445198	-0.700087
Cchl	-0.989895	-0.019912	1.00981
Ccm3	-1.12997	0.770822	0.359152
Ccs	-0.480257	1.14953	-0.669275
CCT1	0.511534	0.640754	-1.15229
CCT2	-0.801913	-0.318558	1.12047
CCT3	0.612087	0.541903	-1.15399
CCT4	-0.929679	-0.128265	1.05794
CCT5	0.502535	0.649062	-1.1516
CCT6	0.583111	0.57157	-1.15468
CCT7	0.496211	0.654851	-1.15106
CCT8	0.906957	0.165449	-1.07241
Ccz1	-0.0464764	1.02243	-0.975951
cd	1.14441	-0.438971	-0.705435
CD98hc	-0.99534	-0.00925616	1.0046
Cda5	-0.57735	1.1547	-0.57735
CDase	1.0845	-0.198905	-0.885599
cdc14	-0.335802	1.12468	-0.788879
Cdc16	-0.768295	1.13067	-0.362373
Cdc23	1.1147	-0.296413	-0.818284
Cdc27	1.03796	-0.0808215	-0.957137
Cdc2rk	0.639388	0.513005	-1.15239
Cdc37	-0.660702	-0.489774	1.15048
Cdc42	0.529785	0.623643	-1.15343
CDC45L	1.10197	-0.252247	-0.849724
Cdc5	-0.590585	1.1546	-0.564014
CDC50	0.353653	0.775117	-1.12877
Cdc6	-0.992477	1.00736	-0.014879
Cdc7	-0.1421	1.06345	-0.921349
Cdep	0.0838592	0.95543	-1.03929
CdGAPr	0.107907	0.94167	-1.04958
cdi	0.357637	0.772008	-1.12965
cDIP	-0.658634	1.15069	-0.492054
Cdk1	-0.817846	-0.297013	1.11486
Cdk12	-0.414939	1.14067	-0.725734
Cdk2	-0.0419277	1.0203	-0.978377
CDK2AP1	1.04112	-0.0880574	-0.953059
Cdk4	1.12931	-0.773203	-0.356108
Cdk5	-1.00853	0.0172811	0.991247
Cdk5alpha	-0.57735	-0.57735	1.1547
Cdk7	0.917191	0.148917	-1.06611
Cdk8	-0.287023	1.11213	-0.825103
Cdk9	0.816518	0.298829	-1.11535
Cdlc2	0	0	0
cdm	0.353001	0.775625	-1.12863
Cds	0.291443	0.821903	-1.11335
Cec2	-0.57735	-0.57735	1.1547
CecA1	-0.598476	-0.555963	1.15444
CecA2	-0.57735	-0.57735	1.1547
CecB	-0.554517	-0.599886	1.1544
CecC	-0.913954	-0.154182	1.06814
Ced-12	0.447037	0.6985	-1.14554
ced-6	-0.0726425	-0.961698	1.03434
Cen	0.307971	0.809791	-1.11776
CenB1A	-0.785767	1.12564	-0.33987
CenG1A	-0.621312	-0.532242	1.15355
Cenp-C	1.09516	-0.23062	-0.864542
Cep135	-0.691701	-0.454876	1.14658
cep290	-0.57735	-0.57735	1.1547
Cep89	-0.57735	-0.57735	1.1547
Cep97	-0.633566	1.15281	-0.519247
cer	0.0298738	0.984728	-1.0146
Cerk	-0.70678	1.14418	-0.437399
cert	-0.420732	1.14162	-0.72089
cerv	-0.786366	1.12545	-0.339089
Cf2	0.942563	0.10637	-1.04893
Cfp1	-0.966775	-0.0634305	1.03021
cg	0.340142	0.785558	-1.1257
CG10005	-0.57735	-0.57735	1.1547
CG10011	0.269447	0.83767	-1.10712
CG10026	0.453568	0.69284	-1.14641
CG10031	-0.921832	1.06314	-0.141305
CG10038	-1.14165	0.720762	0.420885
CG10041	1.07951	-0.18481	-0.894704
CG10050	0.248223	-1.10073	0.85251
CG10053	1.15018	-0.486644	-0.663531
CG10055	-0.706126	-0.438164	1.14429
CG10063	-0.57735	1.1547	-0.57735
CG10064	0.723103	0.41809	-1.14119
CG10068	0.321527	0.799687	-1.12121
CG10075	-0.940512	-0.109898	1.05041
CG10077	0.0409937	0.978873	-1.01987
CG10082	0.102458	0.944827	-1.04728
CG10086	-0.57735	1.1547	-0.57735
CG10089	-0.57735	1.1547	-0.57735
CG10096	-0.57735	-0.57735	1.1547
CG10098	-0.908333	-0.163246	1.07158
CG10103	-0.568032	-0.586619	1.15465
CG10126	-0.122747	1.05571	-0.93296
CG10132	0.384061	0.751035	-1.1351
CG10137	0.502237	0.649337	-1.15157
CG10139	-1.13594	0.38845	0.747492
CG10147	-0.984508	-0.0302962	1.0148
CG10151	-1.07682	0.177365	0.89945
CG10165	-0.759282	-0.373763	1.13305
CG10166	-0.91608	1.06681	-0.150728
CG10171	-0.512963	1.15239	-0.639427
CG10184	-1.03242	0.964073	0.0683469
CG10185	1.1547	-0.57735	-0.57735
CG10188	0.244748	0.854905	-1.09965
CG10189	-1.13876	0.403786	0.734973
CG10194	-1.14287	0.714224	0.428644
CG10195	-0.867739	-0.225881	1.09362
CG10208	1.15079	-0.493173	-0.657618
CG10209	0.546068	0.608078	-1.15415
CG10214	-0.655675	-0.495307	1.15098
CG10222	-1.15411	0.544998	0.609109
CG10232	-0.824472	1.11237	-0.287896
CG10237	-0.57735	1.1547	-0.57735
CG1024	0.913097	-1.06867	0.155571
CG10252	-0.57735	1.1547	-0.57735
CG10254	0.954989	0.0846415	-1.03963
CG10265	0.0428771	-1.02075	0.977872
CG10268	-1.14435	0.43858	0.70577
CG10274	0.119995	0.934588	-1.05458
CG10283	-1.05595	0.932607	0.123343
CG10286	1.0553	-0.93355	-0.121751
CG10307	0	0	0
CG10311	-0.566378	1.15463	-0.588254
CG10321	0.626164	0.52712	-1.15328
CG10324	-0.790104	-0.334196	1.1243
CG10333	0.0950352	-1.04412	0.94909
CG10336	0.774465	0.354491	-1.12896
CG10337	0.935608	0.118267	-1.05387
CG10338	0.937731	0.114655	-1.05239
CG10340	-0.519304	-0.633512	1.15282
CG10341	0.525829	-1.15321	0.627382
CG10343	-1.06594	0.148482	0.917457
CG10344	-0.234124	-0.862167	1.09629
CG10347	-0.805184	-0.314178	1.11936
CG10353	-0.877309	-0.211535	1.08884
CG10359	0.77722	0.350949	-1.12817
CG10361	0	0	0
CG10365	0.0515177	0.973245	-1.02476
CG10366	-0.908182	1.07167	-0.163488
CG10375	-0.724581	-0.416322	1.1409
CG10376	-0.468831	-0.679449	1.14828
CG10383	-0.169546	-0.904388	1.07393
CG10384	-0.57735	1.1547	-0.57735
CG10395	-0.701717	-0.443305	1.14502
CG10405	-0.923269	1.0622	-0.138933
CG10407	-0.0994522	1.04601	-0.946558
CG10413	0.662479	0.487809	-1.15029
CG10417	-1.09603	0.233302	0.862725
CG10418	-0.402814	-0.735773	1.13859
CG10425	-0.0521566	1.02506	-0.972901
CG10428	-0.693705	1.14628	-0.452573
CG10431	0.46677	0.681271	-1.14804
CG10433	-0.854732	-0.244999	1.09973
CG10435	-0.886045	-0.198221	1.08427
CG10444	-0.685741	1.14743	-0.461691
CG10445	-0.957804	-0.0796313	1.03743
CG10462	-0.494526	-0.656387	1.15091
CG10463	-0.998877	-0.00224269	1.00112
CG10465	-1.1396	0.731015	0.408581
CG10466	-0.940596	-0.109754	1.05035
CG10467	-0.78435	1.12607	-0.341716
CG10469	0.0814687	0.956774	-1.03824
CG10470	-0.770989	1.12993	-0.358939
CG10472	1.15436	-0.601593	-0.552763
CG10492	0.536947	0.616832	-1.15378
CG10494	1.15372	-0.618021	-0.535701
CG10495	1.11969	-0.315455	-0.804232
CG10505	1.14056	-0.414242	-0.726315
CG10508	0.987455	0.0246346	-1.01209
CG10512	-1.04791	0.103935	0.943973
CG10516	-0.343589	-0.782909	1.1265
CG10527	-0.535117	-0.618578	1.15369
CG10543	-0.62633	1.15327	-0.526944
CG10550	0.630568	0.522444	-1.15301
CG10555	-1.00461	0.00929236	0.995321
CG10561	-0.382094	1.13471	-0.752618
CG10565	1.15163	-0.502938	-0.648692
CG10576	-0.877105	-0.211843	1.08895
CG10581	-1.1046	0.843668	0.260932
CG10584	1.14585	-0.449345	-0.696504
CG10589	1.1547	-0.57735	-0.57735
CG10600	-1.11446	0.818935	0.295522
CG10602	-1.05067	0.940148	0.110522
CG10616	-0.027374	1.01341	-0.986032
CG10621	-0.735178	1.13871	-0.403537
CG10623	0.603097	0.551215	-1.15431
CG10628	1.06538	-0.147053	-0.918331
CG10631	0.199934	0.884929	-1.08486
CG10638	1.12055	-0.801674	-0.318877
CG10646	0.917185	-1.06611	0.148925
CG10650	1.1547	-0.57735	-0.57735
CG10654	0.426229	0.716265	-1.14249
CG10657	-0.789253	-0.335312	1.12456
CG10660	0.51177	0.640535	-1.1523
CG10663	-0.57735	1.1547	-0.57735
CG10669	-1.15448	0.596835	0.557644
CG10672	0.249695	-1.10119	0.851492
CG10674	-1.09252	0.222535	0.869986
CG10681	1.15223	-0.641557	-0.510668
CG10694	0	0	0
CG10702	0.252778	0.849356	-1.10213
CG10730	-0.57735	1.1547	-0.57735
CG10731	1.00816	-0.0165223	-0.991636
CG10734	-1.0161	0.0330079	0.983087
CG10737	-0.994347	1.00556	-0.011211
CG10738	-0.118151	-0.935676	1.05383
CG1074	-1.06057	0.134819	0.925751
CG10747	1.08227	-0.192549	-0.889724
CG10764	-1.01918	0.0395357	0.979646
CG1077	0	0	0
CG10778	1.1508	-0.657553	-0.493244
CG10795	0.667573	0.482154	-1.14973
CG10799	1.09939	-0.243901	-0.855487
CG10801	0	0	0
CG10802	-0.930197	1.05759	-0.127396
CG10803	0.759806	0.373105	-1.13291
CG10804	-0.57735	1.1547	-0.57735
CG10809	-0.0931324	-0.950176	1.04331
CG10814	1.14233	-0.42517	-0.717159
CG10822	0	0	0
CG10841	-0.57735	-0.57735	1.1547
CG10859	0.460301	0.68696	-1.14726
CG10862	1.12117	-0.321341	-0.799827
CG10863	0.0249833	-1.01226	0.987274
CG10866	0.21988	0.871763	-1.09164
CG10869	0.385635	0.749766	-1.1354
CG10874	0.828807	0.281879	-1.11069
CG10877	0.818895	0.295576	-1.11447
CG10889	0.538118	0.615713	-1.15383
CG10898	0.214085	0.87562	-1.08971
CG1090	-0.22471	1.09324	-0.868527
CG10903	-0.839208	-0.267271	1.10648
CG10904	0.219208	-1.09142	0.872211
CG10907	-0.866473	-0.227762	1.09423
CG10914	-0.63155	1.15295	-0.521397
CG10916	-0.341493	-0.784521	1.12601
CG1092	0.638315	0.514158	-1.15247
CG10927	-0.994318	-0.0112689	1.00559
CG10931	0	0	0
CG10932	0.198733	0.885712	-1.08444
CG10936	-0.57735	1.1547	-0.57735
CG10939	0.632428	0.520461	-1.15289
CG10947	-0.57735	-0.57735	1.1547
CG10948	-1.13063	0.362193	0.768436
CG10949	-0.964131	1.03237	-0.0682427
CG10958	-0.99711	-0.005755	1.00287
CG10959	-1.14229	0.717339	0.424955
CG10960	-0.670596	-0.478782	1.14938
CG10962	0.529959	0.623479	-1.15344
CG10970	-0.631502	1.15295	-0.521449
CG10973	-0.91137	-0.158362	1.06973
CG10979	-1.13352	0.376082	0.757433
CG10984	0.8087	0.309445	-1.11814
CG11000	-1.14713	0.459254	0.687878
CG11007	-1.07279	0.906322	0.166465
CG1103	0.592197	0.562375	-1.15457
CG11030	-0.83515	-0.272999	1.10815
CG11034	-0.587374	-0.567268	1.15464
CG11035	-0.494101	1.15087	-0.656774
CG1105	-1.04443	0.948682	0.0957483
CG11050	-0.613786	-0.540131	1.15392
CG11052	0	0	0
CG11068	-0.57735	1.1547	-0.57735
CG11069	0	0	0
CG11070	-0.501044	1.15147	-0.650431
CG11076	-0.630888	-0.522103	1.15299
CG11077	-0.996799	-0.00637199	1.00317
CG11089	-0.713018	-0.430069	1.14309
CG11095	-1.08683	0.881211	0.205614
CG11103	0.962113	0.0718933	-1.03401
CG11106	0	0	0
CG11109	-0.728968	-0.411051	1.14002
CG11110	-0.74955	-0.385903	1.13545
CG11122	0.939143	0.112242	-1.05139
CG11123	0.232988	0.862938	-1.09593
CG11125	-1.07284	0.166601	0.906236
CG11127	1.01703	-0.982049	-0.0349845
CG11134	0.553467	-1.15438	0.600909
CG11137	-1.07997	0.186071	0.893896
CG11141	-0.584929	1.15467	-0.569738
CG11151	-0.694158	1.14621	-0.452051
CG11155	1.07577	-0.174521	-0.901252
CG11158	1.03875	-0.0826242	-0.956125
CG1116	-1.13838	0.401637	0.73674
CG11164	0.845831	0.257839	-1.10367
CG11168	0.182779	0.896003	-1.07878
CG11170	0.39366	0.743262	-1.13692
CG11178	-0.578022	1.1547	-0.576678
CG11180	-0.449774	-0.696133	1.14591
CG11200	-0.550422	1.15429	-0.603866
CG11236	-0.57735	-0.57735	1.1547
CG1124	1.1547	-0.57735	-0.57735
CG11241	-1.08761	0.879705	0.207904
CG11247	1.02222	-0.976193	-0.0460252
CG11248	-0.47914	1.14942	-0.670275
CG11249	0.343707	0.782819	-1.12653
CG11257	1.14934	-0.478433	-0.670908
CG11267	-0.739373	-0.398426	1.1378
CG11275	0	0	0
CG11279	-1.15364	0.534027	0.619616
CG1129	-1.15436	0.553026	0.601338
CG11291	0	0	0
CG11294	-0.57735	1.1547	-0.57735
CG11307	0.945724	-1.04663	0.100902
CG11309	-0.179504	1.07759	-0.898091
CG11313	0.960817	0.0742299	-1.03505
CG11318	-0.57735	-0.57735	1.1547
CG11319	0	0	0
CG11322	0	0	0
CG11327	1.1547	-0.57735	-0.57735
CG11334	0.960067	0.0755776	-1.03564
CG11342	-1.03471	0.0734747	0.961236
CG11350	0.862612	0.233469	-1.09608
CG11353	-0.57735	-0.57735	1.1547
CG11357	0.149895	-1.06649	0.916591
CG1136	0	0	0
CG11360	-0.973259	1.02475	-0.0514932
CG11362	0	0	0
CG11367	0.510458	0.641752	-1.15221
CG1137	0	0	0
CG11373	-0.57735	1.1547	-0.57735
CG11374	0.317024	0.803061	-1.12008
CG11377	-0.484155	1.14993	-0.665774
CG11378	1.09984	-0.245343	-0.854495
CG11396	-1.14837	0.469632	0.67874
CG11398	-0.453288	1.14637	-0.693083
CG11399	0.642685	0.50945	-1.15214
CG11400	-0.126519	1.05724	-0.930719
CG11403	0.654308	0.496807	-1.15111
CG11406	1.07545	-0.173649	-0.901803
CG11413	-0.57735	-0.57735	1.1547
CG11414	0.746884	0.3892	-1.13608
CG11417	-0.465858	-0.682075	1.14793
CG1142	-0.622575	-0.530912	1.15349
CG11426	0	0	0
CG1143	-1.01648	0.982662	0.0338189
CG11436	0.123524	0.9325	-1.05602
CG11438	0	0	0
CG11444	-0.687285	-0.45993	1.14722
CG11447	1.09082	-0.873412	-0.217407
CG11454	-0.453101	-0.693245	1.14635
CG11456	-0.792482	-0.331068	1.12355
CG1146	-0.479732	1.14948	-0.669745
CG11474	0.388507	0.747445	-1.13595
CG11475	1.1547	-0.57735	-0.57735
CG11486	-0.541655	-0.612325	1.15398
CG11504	1.01553	-0.0318102	-0.983715
CG11523	0.157002	0.912212	-1.06921
CG11537	-0.171743	-0.903006	1.07475
CG11539	0.969404	-1.02802	0.0586129
CG11555	-0.800403	-0.320574	1.12098
CG11560	1.10097	-0.85199	-0.248975
CG11562	-1.05486	0.934196	0.120659
CG11563	-0.6095	-0.544592	1.15409
CG11583	-0.583441	-0.571238	1.15468
CG11586	-1.01013	0.989551	0.0205797
CG11590	1.14799	-0.681617	-0.466378
CG11593	-0.918313	-0.147083	1.0654
CG11594	-0.184608	1.07944	-0.894833
CG11596	-0.311278	-0.807341	1.11862
CG11597	1.10828	-0.273448	-0.834831
CG11598	1.1547	-0.57735	-0.57735
CG11601	-0.784061	-0.342092	1.12615
CG1161	0.801565	0.319023	-1.12059
CG11619	-0.57735	1.1547	-0.57735
CG11638	0.57955	0.575148	-1.1547
CG11655	-0.0469702	1.02266	-0.975687
CG11656	0	0	0
CG11658	0.0104743	0.994722	-1.0052
CG11663	1.1547	-0.57735	-0.57735
CG11674	-0.57735	1.1547	-0.57735
CG11679	-0.995115	-0.0096987	1.00481
CG11686	-0.823039	-0.289876	1.11291
CG11695	0.427743	-1.14273	0.714986
CG11696	1.09712	-0.236725	-0.860397
CG11699	0.7166	0.425832	-1.14243
CG11700	0.695722	-1.14597	0.450248
CG11710	0.419456	-1.14142	0.72196
CG1172	-1.08797	0.208959	0.87901
CG11722	-1.08496	0.884748	0.200211
CG11723	-0.100739	1.04656	-0.945818
CG11737	0.637639	0.514884	-1.15252
CG11752	-0.529914	-0.623521	1.15344
CG11753	-0.80003	-0.32107	1.1211
CG11755	-0.625139	1.15334	-0.528205
CG11756	-0.57735	-0.57735	1.1547
CG11760	1.06616	-0.14906	-0.917103
CG11768	0.575903	0.578797	-1.1547
CG11771	0.977442	0.0436835	-1.02113
CG11777	0.896627	-1.07843	0.181802
CG11779	-0.182184	1.07857	-0.896383
CG11781	-0.874701	1.09017	-0.215469
CG11786	0	0	0
CG11788	-0.167612	1.07321	-0.905603
CG11790	-0.372778	-0.760066	1.13284
CG11791	-0.378289	-0.755669	1.13396
CG11807	0.188128	0.892575	-1.0807
CG11808	-0.986372	-0.0267209	1.01309
CG11811	-0.652871	-0.49838	1.15125
CG11815	0	0	0
CG11825	-0.183486	1.07904	-0.895551
CG11835	0	0	0
CG11836	1.1323	-0.762156	-0.370146
CG11837	-0.601716	-0.552637	1.15435
CG11839	-0.532764	-0.620817	1.15358
CG11842	1.1547	-0.57735	-0.57735
CG11852	0	0	0
CG11854	-0.57735	1.1547	-0.57735
CG11857	-0.964346	1.0322	-0.0678519
CG11858	-0.733164	-0.40598	1.13914
CG11873	-0.200845	-0.884334	1.08518
CG11882	0.536021	0.617716	-1.15374
CG11883	-1.14381	0.434868	0.708939
CG11885	-1.14703	0.688601	0.458427
CG11893	0.871075	0.220909	-1.09198
CG11899	0.826964	0.284442	-1.11141
CG11902	-0.34766	1.12743	-0.779768
CG11906	-0.806633	1.11886	-0.31223
CG11911	1.15438	-0.553554	-0.600824
CG11920	-0.978638	-0.0414352	1.02007
CG11927	-0.0789403	1.03713	-0.95819
CG11929	1.1547	-0.57735	-0.57735
CG11961	0.683234	0.464543	-1.14778
CG11964	0.170702	-1.07436	0.903661
CG11970	1.1516	-0.649001	-0.502602
CG11975	-0.331858	1.12374	-0.791882
CG11980	-0.578654	-0.576046	1.1547
CG11983	1.1547	-0.57735	-0.57735
CG11986	0.890337	0.191601	-1.08194
CG11999	-0.643947	-0.508086	1.15203
CG12003	0	0	0
CG12004	-0.919622	-0.144938	1.06456
CG12007	-0.938961	-0.112554	1.05152
CG12010	-0.562199	1.15457	-0.59237
CG12012	-1.15459	0.563683	0.59091
CG12016	0.728944	0.41108	-1.14002
CG12024	0.619805	0.533828	-1.15363
CG12025	-1.10938	0.832113	0.277263
CG12054	-0.467675	1.14815	-0.680471
CG12056	-1.06774	0.914588	0.153154
CG12065	0.365091	0.766154	-1.13125
CG12071	-0.320898	1.12106	-0.800159
CG12075	-0.57735	1.1547	-0.57735
CG1208	-0.92969	-0.128247	1.05794
CG12081	0.734974	0.403785	-1.13876
CG12084	-0.389585	-0.746573	1.13616
CG12091	1.11618	-0.301965	-0.814218
CG12093	0.0913263	0.951204	-1.04253
CG12096	-1.14698	0.458084	0.688901
CG12099	0.752583	0.382137	-1.13472
CG12104	0.979495	0.03982	-1.01932
CG12105	-1.01244	0.0253632	0.987077
CG12106	-1.11091	0.828243	0.282664
CG12107	-0.0362682	-0.981373	1.01764
CG12112	-0.585188	-0.569477	1.15466
CG12116	0.989993	0.0197224	-1.00972
CG12118	-0.815575	-0.300117	1.11569
CG12121	0.28862	0.823948	-1.11257
CG12123	-0.175849	-0.900411	1.07626
CG12126	-0.57735	1.1547	-0.57735
CG12128	-1.13644	0.745372	0.391065
CG12129	-0.910362	-0.159987	1.07035
CG1213	1.1547	-0.57735	-0.57735
CG12133	-0.57735	-0.57735	1.1547
CG12134	-0.737435	-0.40079	1.13823
CG12155	-0.966706	1.03026	-0.0635564
CG12159	1.13712	-0.742379	-0.394744
CG12163	0.511234	0.641032	-1.15227
CG12170	-0.270915	1.10754	-0.83663
CG12171	0.325659	-1.12224	0.796577
CG12173	-0.611832	-0.542168	1.154
CG12177	0.636197	0.516431	-1.15263
CG12179	-0.592141	1.15457	-0.562432
CG1218	-0.664882	1.15003	-0.485147
CG12182	0.784557	0.341446	-1.126
CG12184	0.887655	0.195743	-1.0834
CG12194	0	0	0
CG12204	0.454077	0.692396	-1.14647
CG12206	-0.57735	1.1547	-0.57735
CG12209	-0.57735	-0.57735	1.1547
CG12213	0.283514	0.827632	-1.11115
CG12219	0.320837	-1.12104	0.800205
CG12224	-0.588327	-0.566303	1.15463
CG12236	-0.0192511	1.00949	-0.990235
CG12237	0.164582	0.907499	-1.07208
CG12241	0.226401	0.86739	-1.09379
CG12253	1.08408	-0.197691	-0.88639
CG12259	-0.461028	-0.686323	1.14735
CG12267	-0.819226	-0.295122	1.11435
CG1227	-1.0882	0.20963	0.878568
CG12279	0.244832	0.854847	-1.09968
CG12288	-0.625794	-0.527511	1.15331
CG12290	-1.00927	0.990463	0.0188084
CG12299	-0.266006	1.10611	-0.8401
CG12301	-0.445581	-0.699757	1.14534
CG12316	-0.654911	1.15106	-0.496145
CG12320	-0.962519	-0.0711605	1.03368
CG12321	0.0405197	0.979124	-1.01964
CG12325	-0.843051	-0.261811	1.10486
CG1233	0.361543	0.768947	-1.13049
CG12333	0.386938	0.748714	-1.13565
CG12338	-0.745941	-0.390363	1.1363
CG1234	-0.978291	-0.0420886	1.02038
CG12341	-1.13864	0.735523	0.403117
CG12343	-0.791159	-0.33281	1.12397
CG12344	0.713937	0.428983	-1.14292
CG12355	1.1547	-0.57735	-0.57735
CG1236	0.458854	-1.14708	0.688227
CG12362	-0.57735	1.1547	-0.57735
CG12374	-0.57735	1.1547	-0.57735
CG12375	-0.829317	1.11049	-0.281169
CG12376	0	0	0
CG12379	-0.438738	-0.705634	1.14437
CG12384	-0.841804	-0.263586	1.10539
CG1239	-0.857605	-0.240814	1.09842
CG12391	-0.282235	-0.828551	1.11079
CG12446	-0.57735	-0.57735	1.1547
CG12448	1.1547	-0.57735	-0.57735
CG1246	1.0699	-0.158793	-0.911103
CG12470	0.750948	0.38417	-1.13512
CG12493	1.1547	-0.57735	-0.57735
CG12499	1.00964	-0.0195753	-0.990069
CG12512	1.13975	-0.409499	-0.730255
CG12519	0.406592	-1.13925	0.732659
CG12531	1.1547	-0.57735	-0.57735
CG12535	0.501813	0.649725	-1.15154
CG12541	0	0	0
CG12547	-1.03995	0.0853807	0.954572
CG12560	-0.616627	-0.537162	1.15379
CG12567	-1.13759	0.740308	0.397283
CG12576	0.584333	0.570339	-1.15467
CG12581	-0.57735	-0.57735	1.1547
CG12592	0.558863	0.595642	-1.15451
CG12594	-0.57735	-0.57735	1.1547
CG12605	0	0	0
CG12608	-0.671012	-0.478317	1.14933
CG12617	0.820596	0.29324	-1.11384
CG12643	0.397317	0.740279	-1.1376
CG1265	1.08326	-0.195338	-0.887918
CG12655	-0.57735	-0.57735	1.1547
CG12659	-1.14951	0.6695	0.480006
CG12674	0.726506	0.414012	-1.14052
CG12689	0	0	0
CG12692	0	0	0
CG12693	1.1547	-0.57735	-0.57735
CG12698	0	0	0
CG12699	0.577253	0.577448	-1.1547
CG12702	0.657047	0.493801	-1.15085
CG1271	-0.961949	-0.0721898	1.03414
CG12713	-0.56667	1.15464	-0.587965
CG12717	-0.943902	-0.104058	1.04796
CG12725	0	0	0
CG12728	0.20204	0.883554	-1.08559
CG12730	-1.0329	0.96348	0.0694219
CG12744	-0.199539	1.08473	-0.885186
CG12746	-1.06465	0.919489	0.145156
CG1275	0.330832	0.792662	-1.12349
CG12766	0.893428	-1.08023	0.1868
CG12768	1.01387	-0.0283408	-0.985528
CG12773	1.13037	-0.360993	-0.769379
CG12795	-1.02771	0.0579486	0.969766
CG12811	1.137	-0.742914	-0.394087
CG12814	0	0	0
CG12818	-1.00953	0.0193455	0.990187
CG12822	-0.633438	-0.519383	1.15282
CG12824	1.1547	-0.57735	-0.57735
CG12825	1.07378	-0.169135	-0.904647
CG12826	0	0	0
CG12836	-0.57735	1.1547	-0.57735
CG12848	-0.79738	1.12197	-0.324594
CG12851	0	0	0
CG12853	1.04072	-0.0871333	-0.953582
CG12857	-0.723322	1.14115	-0.417828
CG12860	-0.57735	1.1547	-0.57735
CG12861	0	0	0
CG12863	0.546663	0.607503	-1.15417
CG12868	-0.0852483	-0.954647	1.0399
CG12869	0.981401	0.0362146	-1.01762
CG12877	0.684674	-1.14758	0.462905
CG1288	-0.57735	1.1547	-0.57735
CG12880	0	0	0
CG12883	-1.11769	0.809997	0.307693
CG12895	-0.711649	-0.431682	1.14333
CG12896	-0.150006	1.06653	-0.916523
CG12909	-0.753742	-0.380694	1.13444
CG12910	-0.57735	-0.57735	1.1547
CG12913	1.15381	-0.616138	-0.537674
CG12917	-0.57735	1.1547	-0.57735
CG12920	-0.163059	1.07151	-0.90845
CG12923	0	0	0
CG12926	0.510085	0.642098	-1.15218
CG12929	0.610607	-1.15405	0.543442
CG12934	0.836426	0.271202	-1.10763
CG12935	-0.14467	1.06446	-0.919786
CG12942	-0.100581	1.04649	-0.945909
CG12945	-1.10106	0.851775	0.249286
CG12947	-1.14921	0.672018	0.477191
CG12948	1.09751	-0.237942	-0.859567
CG12963	0.00512224	-1.00255	0.997429
CG12971	-0.57735	1.1547	-0.57735
CG12974	-0.494524	-0.656388	1.15091
CG12975	-0.555084	-0.599334	1.15442
CG12984	-0.57735	1.1547	-0.57735
CG12990	0	0	0
CG12991	1.1547	-0.57735	-0.57735
CG12992	1.1547	-0.57735	-0.57735
CG13000	-0.57735	1.1547	-0.57735
CG13001	-0.917377	-0.148613	1.06599
CG13003	-0.57735	-0.57735	1.1547
CG13004	0.76853	0.362074	-1.1306
CG13005	-0.995023	1.0049	-0.00988152
CG13010	-0.841403	1.10556	-0.264157
CG13012	-0.17105	1.07449	-0.903442
CG13014	0.574851	-1.1547	0.579846
CG13016	-0.775752	1.12859	-0.352837
CG13018	-0.793633	1.12318	-0.329551
CG13021	-0.57735	1.1547	-0.57735
CG13024	-0.57735	1.1547	-0.57735
CG13025	1.02616	-0.0545617	-0.971602
CG13032	-0.57735	1.1547	-0.57735
CG1307	-0.944949	-0.102247	1.0472
CG13074	1.13397	-0.378367	-0.755607
CG13077	-1.11213	0.825091	0.287039
CG13078	-0.57735	-0.57735	1.1547
CG13085	0.641052	0.511213	-1.15226
CG13086	0.948645	0.0958126	-1.04446
CG13088	0.96206	0.0719897	-1.03405
CG1309	-1.15253	0.514928	0.637599
CG13096	-0.522933	-0.630108	1.15304
CG13097	-0.217644	-0.873254	1.0909
CG13101	0	0	0
CG13102	0.197647	-1.08407	0.886419
CG13108	-0.57735	1.1547	-0.57735
CG13116	-0.59782	-0.556635	1.15446
CG13117	0.570829	-1.15468	0.583847
CG13123	1.15357	-0.620961	-0.532612
CG13124	0.390353	-1.1363	0.74595
CG13126	-0.2427	1.09901	-0.856312
CG13127	-0.57735	-0.57735	1.1547
CG13138	-0.57735	-0.57735	1.1547
CG13144	-0.127664	1.0577	-0.930037
CG13148	-0.57735	1.1547	-0.57735
CG13151	1.08131	-0.189841	-0.891472
CG13154	0.860991	0.235853	-1.09684
CG13155	0	0	0
CG13159	-0.57735	-0.57735	1.1547
CG1316	0.859178	-1.09769	0.238513
CG13160	-0.57735	-0.57735	1.1547
CG13168	-0.57735	1.1547	-0.57735
CG1317	0.845473	0.258352	-1.10382
CG13175	0.849203	0.252997	-1.1022
CG13185	-1.06748	0.15247	0.915009
CG13192	-0.710697	-0.432802	1.1435
CG13197	-0.887392	-0.196149	1.08354
CG13204	-0.358772	1.12989	-0.77112
CG13220	-0.588742	-0.565883	1.15463
CG13229	0	0	0
CG13231	-0.742899	1.13701	-0.394106
CG1324	1.1547	-0.57735	-0.57735
CG13244	-0.57735	-0.57735	1.1547
CG13247	-0.57735	1.1547	-0.57735
CG13248	0.349482	0.778357	-1.12784
CG13252	-0.57735	1.1547	-0.57735
CG13255	-0.919618	1.06456	-0.144945
CG13258	-0.57735	1.1547	-0.57735
CG13282	-0.57735	1.1547	-0.57735
CG13293	0	0	0
CG13295	0.377499	-1.1338	0.756301
CG13300	1.15392	-0.540147	-0.613771
CG13314	0	0	0
CG13315	0.221586	0.870622	-1.09221
CG13319	-1.11867	0.807204	0.311462
CG13321	-0.656738	-0.49414	1.15088
CG13337	1.1547	-0.57735	-0.57735
CG13339	-0.0738402	-0.961033	1.03487
CG13344	0.9972	0.00557702	-1.00278
CG13358	0.933087	0.122534	-1.05562
CG13359	0	0	0
CG13360	-0.110635	1.05072	-0.940082
CG13362	-0.57735	1.1547	-0.57735
CG13364	-0.789194	-0.335389	1.12458
CG13365	-0.605832	-0.548392	1.15422
CG13366	-1.01665	0.0341722	0.982476
CG13367	-0.609758	-0.544324	1.15408
CG13369	0.509782	0.642378	-1.15216
CG13373	0.123263	0.932655	-1.05592
CG13375	-0.974028	-0.0500633	1.02409
CG13377	0.943947	0.103981	-1.04793
CG13384	0.102692	0.944692	-1.04738
CG13390	-0.965237	1.03147	-0.0662339
CG13392	0.9144	0.15346	-1.06786
CG13397	1.14621	-0.452031	-0.694176
CG13398	1.15462	-0.588989	-0.565633
CG13405	1.1547	-0.57735	-0.57735
CG13409	-0.57735	-0.57735	1.1547
CG13430	0.99733	0.00531918	-1.00265
CG13436	0	0	0
CG13437	-0.57735	-0.57735	1.1547
CG1344	-0.263861	1.10547	-0.841611
CG13442	-0.57735	1.1547	-0.57735
CG13449	0	0	0
CG13457	-0.203421	1.08607	-0.88265
CG13458	-0.57735	1.1547	-0.57735
CG13482	-0.523315	-0.629749	1.15306
CG13484	0.291081	0.822165	-1.11325
CG13488	0.775292	0.353429	-1.12872
CG13506	-0.571614	-0.583067	1.15468
CG13510	0.346447	0.780705	-1.12715
CG13511	0.346447	0.780705	-1.12715
CG13516	0.0858952	-1.04018	0.954282
CG13531	0.394125	0.742884	-1.13701
CG1354	-1.1512	0.653424	0.497775
CG13540	0	0	0
CG13544	0.748782	0.386854	-1.13564
CG13551	-0.372556	-0.760243	1.1328
CG13559	-0.628205	-0.524956	1.15316
CG13562	1.15051	-0.49009	-0.660415
CG13563	0.218998	0.872351	-1.09135
CG13578	-0.57735	1.1547	-0.57735
CG1358	0.239839	0.858272	-1.09811
CG13585	-0.0131685	1.00652	-0.993351
CG13599	1.12887	-0.774769	-0.354101
CG1360	1.15364	-0.533992	-0.619649
CG13601	-0.950326	1.04319	-0.0928686
CG13603	0.523697	0.62939	-1.15309
CG13604	0.498001	0.653217	-1.15122
CG13605	0.778187	0.349703	-1.12789
CG13607	-0.57735	1.1547	-0.57735
CG13609	-1.06478	0.919275	0.145507
CG13623	-0.655646	1.15099	-0.495339
CG13625	-0.680729	-0.467383	1.14811
CG13630	-0.524252	-0.628868	1.15312
CG13631	-0.997625	-0.00473356	1.00236
CG13654	0.101511	0.945373	-1.04688
CG13659	-0.56164	1.15456	-0.592919
CG13663	-1.00894	0.0181265	0.990814
CG13667	-0.813148	-0.303421	1.11657
CG13671	0.73784	0.400297	-1.13814
CG13676	1.02572	-0.0535903	-0.972127
CG13689	1.10215	-0.252837	-0.849314
CG13690	-0.207083	1.08733	-0.880246
CG13692	-1.15386	0.538786	0.615074
CG13693	1.0597	-0.927069	-0.132626
CG13694	-0.57735	1.1547	-0.57735
CG13698	0	0	0
CG13707	0	0	0
CG1371	-0.190717	1.08162	-0.890907
CG13739	-0.57735	-0.57735	1.1547
CG13741	-0.281654	1.11062	-0.828969
CG13742	-1.13204	0.763154	0.368887
CG13743	-0.57735	1.1547	-0.57735
CG13747	-0.57735	1.1547	-0.57735
CG13749	-0.57735	1.1547	-0.57735
CG13751	0.426076	0.716394	-1.14247
CG13760	-0.403818	1.13876	-0.734946
CG13766	0.709861	0.433785	-1.14365
CG13773	-0.564892	-0.58972	1.15461
CG13775	0.879546	0.208146	-1.08769
CG13784	1.1539	-0.53976	-0.614141
CG13807	-1.12793	0.349881	0.778048
CG13813	-1.10471	0.261292	0.843415
CG13827	1.03823	-0.0814332	-0.956794
CG13850	-1.09153	0.219552	0.871982
CG13868	-0.388935	-0.747099	1.13603
CG13871	-1.14279	0.714674	0.428112
CG13875	-0.0314543	1.01536	-0.983902
CG13876	0.795908	0.326545	-1.12245
CG13877	-0.760545	1.13272	-0.372176
CG13887	-1.07886	0.895857	0.183007
CG13891	0	0	0
CG13893	0.435728	0.708206	-1.14393
CG13895	1.13955	-0.40833	-0.731223
CG13896	-0.804339	-0.315312	1.11965
CG13898	-0.57735	1.1547	-0.57735
CG13901	-0.637523	-0.515009	1.15253
CG13907	0.645133	0.506802	-1.15194
CG13917	1.10171	-0.251395	-0.850315
CG13919	-1.15459	0.590918	0.563675
CG13920	1.1547	-0.577065	-0.577636
CG13921	-0.272763	1.10808	-0.835318
CG13926	-0.0548343	1.02629	-0.971455
CG13928	-0.57735	-0.57735	1.1547
CG13933	0.658791	0.491882	-1.15067
CG13937	-0.391826	-0.744754	1.13658
CG1394	0.876597	0.212612	-1.08921
CG13982	1.09199	-0.220921	-0.871067
CG13992	-0.780293	1.12727	-0.346981
CG13994	0.588119	0.566514	-1.15463
CG14005	-0.118831	1.05411	-0.935275
CG14015	0	0	0
CG14020	1.13373	-0.377171	-0.756564
CG14024	-0.810663	1.11745	-0.306792
CG14036	0.952717	0.0886615	-1.04138
CG14042	1.1547	-0.57735	-0.57735
CG14043	0.285058	-1.11158	0.82652
CG14044	0	0	0
CG14050	-1.07254	0.165819	0.906726
CG14053	0	0	0
CG14054	0	0	0
CG14057	-0.454386	-0.692128	1.14651
CG1407	-1.11965	0.315307	0.804343
CG14072	-0.57735	1.1547	-0.57735
CG14073	-0.975185	-0.0479072	1.02309
CG14074	-0.0389588	-0.979951	1.01891
CG14077	-0.57735	1.1547	-0.57735
CG14079	0.903705	0.170632	-1.07434
CG14100	0.325853	0.79643	-1.12228
CG14102	-0.195412	-0.88787	1.08328
CG14104	-1.01621	0.982959	0.0332534
CG14105	-0.420051	-0.721462	1.14151
CG14109	-0.57735	-0.57735	1.1547
CG14113	-0.57735	1.1547	-0.57735
CG14117	1.07237	-0.16534	-0.907025
CG14130	-1.15203	0.508014	0.644014
CG14132	-0.57735	-0.57735	1.1547
CG14135	-0.772438	-0.357087	1.12953
CG14142	0.367019	0.764632	-1.13165
CG14154	0	0	0
CG1416	-1.10478	0.261553	0.843232
CG14174	-1.0416	0.952433	0.0891621
CG1418	-0.572278	-0.582408	1.15469
CG14182	-1.14842	0.470089	0.678335
CG14183	0.92885	-1.0585	0.129653
CG14184	0.235789	-1.09682	0.861035
CG14194	0.104462	0.943668	-1.04813
CG14196	-0.70834	1.14391	-0.435571
CG14200	-0.253036	1.10221	-0.849176
CG14207	0.553842	-1.15439	0.600544
CG14210	-0.749446	-0.386032	1.13548
CG14212	0	0	0
CG14220	1.15426	-0.604867	-0.549389
CG14221	0.664494	-1.15007	0.485577
CG14223	1.1547	-0.57735	-0.57735
CG14229	-1.10296	0.847466	0.255496
CG14230	-0.770617	-0.359414	1.13003
CG14231	-0.635774	1.15266	-0.516885
CG14232	-0.903153	-0.171509	1.07466
CG14252	1.05642	-0.124509	-0.931915
CG14253	-0.662352	-0.48795	1.1503
CG14257	-0.57735	-0.57735	1.1547
CG14260	1.09894	-0.242467	-0.856471
CG14262	0	0	0
CG14269	0	0	0
CG14270	-0.00993672	1.00493	-0.994995
CG14273	-0.57735	-0.57735	1.1547
CG14275	-0.57735	1.1547	-0.57735
CG14285	1.15159	-0.649195	-0.502391
CG14286	0.476939	-1.14918	0.672242
CG14292	-0.0321176	-0.983554	1.01567
CG14294	0	0	0
CG14297	-0.57735	1.1547	-0.57735
CG14302	-0.44882	1.14578	-0.696959
CG14305	0	0	0
CG14312	-0.57735	1.1547	-0.57735
CG14314	0	0	0
CG14322	1.13625	-0.390069	-0.74618
CG14325	0	0	0
CG14332	1.09987	-0.24545	-0.854422
CG1434	-0.482774	1.14979	-0.667017
CG14341	0.909076	-1.07113	0.162055
CG14346	0	0	0
CG14352	0.92809	-1.05901	0.130923
CG14355	0	0	0
CG14367	0.501003	0.650468	-1.15147
CG1440	0.574242	0.580453	-1.15469
CG14401	1.14598	-0.450353	-0.695631
CG14402	0	0	0
CG14406	1.14262	-0.427064	-0.71556
CG14407	-1.1232	0.329633	0.793571
CG14408	-0.737474	1.13822	-0.400743
CG14411	0.278018	0.831573	-1.10959
CG14414	0.268819	-1.10693	0.838114
CG14431	-0.0249151	-0.98731	1.01222
CG14434	-0.725051	-0.415759	1.14081
CG14435	0.218541	0.872656	-1.0912
CG14440	0.74055	0.396986	-1.13754
CG14441	0.74515	0.391339	-1.13649
CG14442	0.607206	0.546971	-1.15418
CG14443	0.414549	0.726059	-1.14061
CG14450	-0.852191	-0.248684	1.10088
CG14451	-0.57735	1.1547	-0.57735
CG14459	0	0	0
CG14464	-0.667611	-0.482112	1.14972
CG14478	0.606364	0.547842	-1.15421
CG14480	-0.526246	-0.626988	1.15323
CG14483	-1.05192	0.113532	0.938389
CG14488	-0.57735	1.1547	-0.57735
CG14490	-1.15393	0.540456	0.613474
CG14491	0	0	0
CG14502	0	0	0
CG14511	0.57915	-1.1547	0.575548
CG14512	-0.996471	-0.00702132	1.00349
CG14516	0	0	0
CG14535	0.830729	0.279198	-1.10993
CG14540	0	0	0
CG14543	-1.05526	0.121648	0.933611
CG14544	-0.818997	-0.295437	1.11443
CG14545	0.223684	0.869216	-1.0929
CG14556	-1.14456	0.440063	0.7045
CG14561	1.10067	-0.85264	-0.248035
CG14562	0.496743	0.654366	-1.15111
CG14566	0	0	0
CG14567	-1.1457	0.448217	0.697481
CG14572	1.09573	-0.863355	-0.232374
CG14579	-0.57735	1.1547	-0.57735
CG14589	1.1547	-0.57735	-0.57735
CG14605	1.12338	-0.330361	-0.793019
CG14609	0.280385	0.829879	-1.11026
CG1461	0	0	0
CG14610	-0.607295	-0.546879	1.15417
CG14613	-0.681755	-0.466221	1.14798
CG14615	0.800253	0.320773	-1.12103
CG14618	-1.14908	0.476029	0.673055
CG14621	0.435495	0.708404	-1.1439
CG14628	0.696207	0.449689	-1.1459
CG14629	-0.684382	1.14762	-0.463238
CG1463	0.768968	0.361516	-1.13048
CG14630	0.840635	0.265248	-1.10588
CG14636	-0.123163	-0.932714	1.05588
CG14641	-0.318083	-0.802269	1.12035
CG14642	0.461867	0.685586	-1.14745
CG14645	1.1257	-0.785545	-0.340159
CG14646	-0.96147	1.03452	-0.0730541
CG14647	0.0151212	0.992354	-1.00747
CG14650	0.765023	0.366524	-1.13155
CG14655	0.000462658	0.999769	-1.00023
CG14657	0.214064	0.875634	-1.0897
CG14658	0	0	0
CG14662	0	0	0
CG14664	-0.57735	-0.57735	1.1547
CG14667	-0.618755	-0.534931	1.15369
CG14669	-0.57735	1.1547	-0.57735
CG14671	-1.14624	0.452302	0.69394
CG14683	-0.696419	-0.449443	1.14586
CG14688	-0.109532	-0.940725	1.05026
CG14692	-0.57735	-0.57735	1.1547
CG14693	-0.57735	1.1547	-0.57735
CG14694	-0.40706	-0.732273	1.13933
CG14695	0.834331	0.274151	-1.10848
CG14696	0.976709	0.0450581	-1.02177
CG14701	-1.11828	0.309977	0.808306
CG14708	1.01109	-0.0225519	-0.988533
CG14710	0.629196	-1.1531	0.523903
CG14711	-0.200272	-0.884708	1.08498
CG14712	-0.806084	1.11905	-0.312969
CG14715	1.03673	-0.0780284	-0.9587
CG14718	0	0	0
CG14721	-1.04027	0.954162	0.0861067
CG14722	-1.15113	0.654174	0.496953
CG14740	-1.0899	0.214665	0.875235
CG14757	0.768442	0.362186	-1.13063
CG14760	-0.57735	1.1547	-0.57735
CG14762	0	0	0
CG14763	-0.57735	1.1547	-0.57735
CG14764	0.863155	0.232669	-1.09582
CG14767	0.368396	0.763543	-1.13194
CG14777	-1.12291	0.79449	0.32842
CG14778	-0.57735	-0.57735	1.1547
CG14780	0.904855	0.168804	-1.07366
CG14785	1.11976	-0.315733	-0.804025
CG14787	1.1545	-0.558462	-0.596035
CG14797	1.1547	-0.57735	-0.57735
CG14803	1.09397	-0.226943	-0.867025
CG14805	0.495186	0.655786	-1.15097
CG14806	0.359786	0.770326	-1.13011
CG14812	-1.10804	0.835426	0.272611
CG14814	0.871516	0.220249	-1.09176
CG14817	-0.922592	-0.140051	1.06264
CG14818	0.222367	0.870099	-1.09247
CG14829	0	0	0
CG14830	0	0	0
CG14834	1.15388	-0.614601	-0.53928
CG14855	-0.507668	-0.644333	1.152
CG14856	-1.00554	0.0111778	0.994364
CG1486	-0.304601	1.11688	-0.812279
CG14860	-0.57735	1.1547	-0.57735
CG14864	1.1547	-0.57735	-0.57735
CG14866	-0.57735	1.1547	-0.57735
CG14868	0.365153	0.766105	-1.13126
CG14879	-0.639222	-0.513183	1.15241
CG14881	-0.100089	1.04628	-0.946192
CG14882	-0.922093	1.06297	-0.140874
CG14883	-0.0613044	1.02924	-0.967937
CG14894	-0.769143	-0.361293	1.13044
CG14903	-0.827824	-0.283247	1.11107
CG14906	-0.566896	-0.587742	1.15464
CG14907	-0.157205	-0.912087	1.06929
CG1492	-0.148707	1.06603	-0.917319
CG14921	-0.507351	1.15198	-0.644626
CG14926	-0.57735	1.1547	-0.57735
CG14931	-0.220841	1.09196	-0.87112
CG14932	-0.57735	-0.57735	1.1547
CG14937	-0.471871	1.14863	-0.676754
CG1494	-0.144606	1.06443	-0.919824
CG14957	0.958866	0.0777314	-1.0366
CG14961	0.772027	-1.12964	0.357613
CG14963	0.969494	0.0584487	-1.02794
CG14964	0.979138	0.0404933	-1.01963
CG14965	0.581548	0.573142	-1.15469
CG14966	0.751304	-1.13503	0.383728
CG14968	1.1547	-0.57735	-0.57735
CG14969	0.481732	0.667952	-1.14968
CG14971	-0.526094	1.15323	-0.627132
CG14974	0	0	0
CG14977	0.0530116	-1.02545	0.97244
CG14984	0	0	0
CG14985	-1.04809	0.104374	0.94372
CG14989	1.05095	-0.939755	-0.111196
CG14990	0.54719	0.606994	-1.15418
CG14995	-0.603358	-0.550946	1.1543
CG14997	-1.05382	0.11814	0.935682
CG15011	0.888645	0.194216	-1.08286
CG15012	-0.585731	-0.568929	1.15466
CG15014	-0.902454	-0.172619	1.07507
CG15019	-0.601175	-0.553193	1.15437
CG15027	-0.648833	-0.502785	1.15162
CG1503	-0.57735	-0.57735	1.1547
CG15034	-0.57735	1.1547	-0.57735
CG15035	1.1547	-0.57735	-0.57735
CG15040	0	0	0
CG15043	-0.373205	1.13293	-0.759726
CG15073	0.687	0.460256	-1.14726
CG15080	-0.57735	1.1547	-0.57735
CG15083	0.356649	0.77278	-1.12943
CG15084	-0.548534	-0.605695	1.15423
CG15093	0.994796	-1.00512	0.0103276
CG15097	-0.413724	1.14047	-0.726746
CG15098	0.0917556	-1.04272	0.95096
CG15099	0.55658	0.597875	-1.15445
CG15107	-1.12356	0.792447	0.331115
CG15109	1.1547	-0.57735	-0.57735
CG15111	0.521667	0.631297	-1.15296
CG15117	0.947134	0.0984492	-1.04558
CG15118	0.290677	0.822458	-1.11313
CG15120	-0.57735	1.1547	-0.57735
CG15127	1.12435	-0.334421	-0.789932
CG15128	-0.0977979	1.04531	-0.947508
CG1513	-0.485775	-0.664316	1.15009
CG15136	0	0	0
CG15141	0.163867	0.907945	-1.07181
CG15142	1.07359	-0.168614	-0.904974
CG15143	0	0	0
CG15144	0	0	0
CG15145	-0.57735	1.1547	-0.57735
CG15147	-0.57735	-0.57735	1.1547
CG15160	-0.412958	1.14034	-0.727383
CG15168	-0.280142	1.11019	-0.830053
CG15170	-0.602672	1.15432	-0.551652
CG15172	-0.57735	1.1547	-0.57735
CG15177	0	0	0
CG15186	0	0	0
CG15196	0	0	0
CG15199	0	0	0
CG15200	1.1547	-0.57735	-0.57735
CG15201	-0.57735	-0.57735	1.1547
CG15202	1.06934	-0.157326	-0.912012
CG15209	0.615588	0.538249	-1.15384
[truncated: 8,393 more rows]

## Sheet: PM6
gene	Unwouned_AverageExpression	Wounded_AverageExpression	Wasp inf. 24h_AverageExpression
128up	1.12697	-0.781336	-0.34563
14-3-3epsilon	-1.07496	0.902653	0.172303
14-3-3zeta	-1.07046	0.160283	0.910178
140up	1.12418	-0.333678	-0.790498
18SrRNA-Psi:CR41602	-1.15469	0.5818	0.572889
18SrRNA-Psi:CR45861	-0.57735	1.1547	-0.57735
18SrRNA:CR41548	-0.57735	1.1547	-0.57735
18SrRNA:CR45838	-0.57735	1.1547	-0.57735
18SrRNA:CR45841	-0.57735	1.1547	-0.57735
18w	1.1547	-0.57735	-0.57735
26-29-p	0.197366	0.886601	-1.08397
28SrRNA-Psi:CR40596	0.377028	0.756678	-1.13371
28SrRNA-Psi:CR40741	-0.735644	1.13861	-0.402971
28SrRNA-Psi:CR41609	-0.707397	1.14407	-0.436676
28SrRNA-Psi:CR45848	-0.57735	1.1547	-0.57735
28SrRNA-Psi:CR45851	-0.57735	1.1547	-0.57735
28SrRNA-Psi:CR45853	-0.356164	1.12932	-0.77316
28SrRNA-Psi:CR45855	-0.986548	-0.0263816	1.01293
28SrRNA-Psi:CR45859	0.00259894	-1.0013	0.998698
28SrRNA-Psi:CR45860	-0.61103	1.15403	-0.543003
28SrRNA-Psi:CR45862	-0.57735	1.1547	-0.57735
28SrRNA:CR45837	-0.57735	1.1547	-0.57735
28SrRNA:CR45844	-0.57735	1.1547	-0.57735
312	1.15427	-0.604491	-0.549778
4E-T	0.978593	0.041521	-1.02011
5-HT1A	1.15452	-0.559367	-0.595149
5.8SrRNA-Psi:CR45849	0	0	0
5.8SrRNA-Psi:CR45854	-0.57735	-0.57735	1.1547
5.8SrRNA-Psi:CR45857	0	0	0
5.8SrRNA-Psi:CR45863	-0.57735	-0.57735	1.1547
5.8SrRNA:CR40454	0	0	0
5.8SrRNA:CR45839	0	0	0
5.8SrRNA:CR45842	0	0	0
5.8SrRNA:CR45852	0	0	0
5PtaseI	0.953444	-1.04082	0.0873769
7B2	-0.57735	1.1547	-0.57735
7SLRNA:CR32864	-0.57735	1.1547	-0.57735
7SLRNA:CR42652	-0.57735	1.1547	-0.57735
a	1.02712	-0.0566589	-0.970466
A16	1.1537	-0.618435	-0.535266
a6	-0.894886	1.07941	-0.184526
AANAT1	-0.57735	1.1547	-0.57735
AANATL2	0	0	0
Aasdh	-0.57735	1.1547	-0.57735
Aatf	-1.14308	0.713078	0.429998
aay	-0.816951	1.11519	-0.298237
ab	1.13343	-0.375674	-0.757759
ABCA	-0.605711	1.15423	-0.548518
ABCB7	0.928144	-1.05898	0.130832
ABCD	1.116	-0.301257	-0.814738
abd-A	-0.676006	-0.472714	1.14872
Abd-B	0	0	0
Abi	-0.331246	1.12359	-0.792348
Abl	-0.210299	1.08842	-0.878126
abo	1.1524	-0.51314	-0.639263
Abp1	0.507793	0.644218	-1.15201
abs	1.1496	-0.48089	-0.668708
Ac13E	-0.854111	1.10001	-0.245901
Ac3	0	0	0
Ac76E	-0.519599	-0.633236	1.15284
Ac78C	-1.05119	0.111771	0.939418
Acbp1	-1.00195	0.00391228	0.998038
Acbp2	-0.18455	1.07942	-0.89487
Acbp3	1.14809	-0.467202	-0.680889
Acbp4	0	0	0
Acbp5	1.15468	-0.571705	-0.582978
Acbp6	1.15437	-0.553121	-0.601245
ACC	0.774259	0.354754	-1.12901
AcCoAS	-1.15121	0.653346	0.49786
Ace	0	0	0
Acer	-0.10065	1.04652	-0.945869
Acf	0.243432	0.855809	-1.09924
achi	1.15428	-0.550072	-0.604205
acj6	0.947552	0.0977204	-1.04527
Ack	1.1368	-0.392991	-0.743806
Ack-like	-0.548165	-0.606052	1.15422
Acn	1.00261	-0.997371	-0.00523695
Acox57D-d	-0.57735	1.1547	-0.57735
Acox57D-p	-0.615728	1.15383	-0.538102
Acp95EF	1.14679	-0.456506	-0.690279
Acph-1	-0.145379	1.06473	-0.919353
Acsl	-1.00827	0.991519	0.0167511
Act42A	-1.07772	0.179851	0.89787
Act57B	-0.838589	1.10674	-0.268148
Act5C	-1.12241	0.796027	0.326387
Act79B	0	0	0
Act87E	1.06097	-0.135818	-0.92515
Act88F	-0.57735	-0.57735	1.1547
Actbeta	0.504754	0.647022	-1.15178
Actn	-0.970844	1.02681	-0.0559619
ACXD	0	0	0
Acyp2	1.14429	-0.706109	-0.438184
Ada	-1.1465	0.454261	0.692236
Ada1-1	-0.57735	-0.57735	1.1547
Ada1-2	1.15467	-0.569561	-0.585105
Ada2a	-0.955214	-0.0842428	1.03946
Ada2b	-0.922662	1.0626	-0.139936
Ada3	-0.206072	1.08698	-0.880911
AdamTS-A	-0.57735	-0.57735	1.1547
AdamTS-B	0	0	0
Adar	-0.751005	1.1351	-0.384098
Adat1	-0.57735	1.1547	-0.57735
Adck1	-0.57735	1.1547	-0.57735
Adck5	1.13798	-0.39944	-0.738542
ADD1	1.14966	-0.481462	-0.668195
AdenoK	-1.02859	0.059874	0.968718
Adf1	-1.14876	0.675669	0.473093
Adgf-A	-1.14509	0.443803	0.701288
Adgf-A2	1.15428	-0.550143	-0.604137
Adh	-0.57735	1.1547	-0.57735
Adhr	-0.57735	1.1547	-0.57735
Adi1	-1.0173	0.0355424	0.981755
AdipoR	1.15425	-0.605064	-0.549185
Adk1	0.847093	0.256031	-1.10312
Adk2	-0.887913	-0.195346	1.08326
Adk3	0.845952	0.257667	-1.10362
AdoR	0	0	0
adp	0.474761	0.674185	-1.14895
AdSL	-1.13546	0.749515	0.385946
AdSS	1.08224	-0.192446	-0.889791
Aduk	0.10305	-1.04753	0.944485
Ady43A	-1.02558	0.97229	0.0532896
Aef1	1.14214	-0.718187	-0.423949
aft	0.252518	0.849536	-1.10205
Afti	1.14197	-0.422903	-0.719067
Ag5r	0	0	0
Ag5r2	1.1547	-0.57735	-0.57735
AGBE	-0.686981	-0.460278	1.14726
AgmNAT	-1.11617	0.814246	0.301927
ago	1.15067	-0.491819	-0.658847
AGO1	1.03263	-0.0688191	-0.963813
AGO2	-1.15466	0.585386	0.569277
AGO3	0.988718	0.0221945	-1.01091
Agpat1	0.802084	0.318329	-1.12041
Agpat2	1.15237	-0.512692	-0.639679
Agpat3	-1.12478	0.336222	0.788558
Agpat4	-0.57735	-0.57735	1.1547
agt	-0.600942	1.15437	-0.553433
Ahcy	-0.356457	1.12939	-0.772931
AhcyL1	-0.425018	1.1423	-0.717287
AIF	1.15025	-0.487428	-0.662824
AIMP1	1.13699	-0.742969	-0.39402
AIMP2	-0.652082	-0.499242	1.15132
AIMP3	-0.893025	-0.187428	1.08045
Ak6	-0.73672	-0.401662	1.13838
Akap200	-0.144174	-0.920088	1.06426
Akh	-0.57735	1.1547	-0.57735
akirin	1.1546	-0.564299	-0.590304
Akt1	-0.487475	1.15026	-0.662781
Aladin	1.14137	-0.419167	-0.722202
AlaRS	-0.0419492	1.02031	-0.978365
AlaRS-m	-0.57735	1.1547	-0.57735
Alas	0.278375	-1.10969	0.831318
alc	-0.739376	1.1378	-0.398422
Ald1	0.387439	0.748309	-1.13575
Aldh	-1.08263	0.889079	0.193547
Aldh-III	0.90272	0.172197	-1.07492
Aldh7A1	-1.13633	0.390513	0.74582
Alg-2	1.14063	-0.725965	-0.414662
Alg1	-1.14726	0.686979	0.460279
Alg10	0.0840886	-1.03939	0.955301
Alg11	-1.15349	0.622581	0.530906
Alg14	0.880254	-1.08732	0.20707
Alg2	-1.15452	0.594955	0.559565
Alg3	0.506738	0.645193	-1.15193
Alg9	1.15434	-0.601988	-0.552357
Alh	-0.744815	-0.391751	1.13657
alien	-1.08028	0.186957	0.893327
ALiX	-1.15052	0.660315	0.490201
Alk	0	0	0
AlkB	-1.15186	0.646025	0.505835
Alp12	-0.206139	1.08701	-0.880867
alph	0.726937	-1.14043	0.413494
alpha-Cat	1.09084	-0.217456	-0.873379
alpha-Est1	-0.912691	1.06892	-0.156228
alpha-Est10	1.15417	-0.607518	-0.546648
alpha-Est3	1.1291	-0.355162	-0.773942
alpha-Est4	-0.57735	1.1547	-0.57735
alpha-Est5	1.15397	-0.541495	-0.612478
alpha-Est7	-0.55245	1.15435	-0.601897
alpha-Est8	-1.11134	0.284212	0.82713
alpha-Est9	-1.03088	0.0649248	0.965956
alpha-Man-Ia	-0.521356	1.15295	-0.631589
alpha-Man-Ib	0.421837	0.719963	-1.1418
alpha-Man-Ic	-0.57735	1.1547	-0.57735
alpha-Man-IIa	0.174772	0.901093	-1.07587
alpha-Man-IIb	-1.1498	0.482862	0.666937
alpha-PheRS	1.15385	-0.615392	-0.538453
alpha-Spec	-0.932461	1.05605	-0.12359
alpha4GT1	0.269646	0.837529	-1.10717
alphaCOP	-0.890184	1.08202	-0.191837
alphaSnap	1.153	-0.522181	-0.630815
alphaTub67C	0	0	0
alphaTub84B	-0.061026	-0.968089	1.02912
alphaTub84D	1.1526	-0.516023	-0.636578
alphaTub85E	-0.595099	1.15452	-0.559417
Alr	-0.217231	1.09076	-0.873529
Als2	1.14592	-0.449867	-0.696052
alt	-1.07463	0.171422	0.903208
Ama	-0.57735	1.1547	-0.57735
Amacr	-0.981591	-0.0358537	1.01744
amn	-1.02138	0.977155	0.0442231
amon	-0.661665	-0.48871	1.15037
AMPdeam	1.07713	-0.898905	-0.178224
Amph	1.14644	-0.453809	-0.69263
AMPKalpha	-0.644503	1.15199	-0.507485
Amun	-1.15143	0.500548	0.650885
amx	-1.07575	0.901293	0.174456
ana	-0.57735	1.1547	-0.57735
ana1	0.675166	0.473659	-1.14882
ana2	1.12072	-0.319544	-0.801174
ana3	1.15444	-0.556125	-0.598319
Ance	-0.812066	-0.30489	1.11696
Ance-2	-0.641838	-0.510365	1.1522
Ance-3	-0.57735	1.1547	-0.57735
Ance-4	0	0	0
Ance-5	-0.551062	1.15431	-0.603246
anchor	-1.13264	0.371801	0.760843
angel	-0.835918	1.10784	-0.271919
Ank	1.10826	-0.273369	-0.834887
Ank2	1.15389	-0.614352	-0.539541
Ankle2	0.056392	0.970611	-1.027
anne	-1.15399	0.612166	0.54182
anox	-1.14107	0.417335	0.723735
Ant2	1.15436	-0.55305	-0.601314
antdh	0	0	0
Antp	0.099486	-1.04602	0.946539
antr	0.418445	0.722806	-1.14125
AnxB10	-1.02527	0.972651	0.0526196
AnxB11	-1.08494	0.200157	0.884783
AnxB9	-1.10413	0.259366	0.844764
aop	-1.15071	0.492246	0.65846
aos	1.1547	-0.57735	-0.57735
Aos1	-1.1164	0.302793	0.81361
AOX1	-0.860884	1.09689	-0.236011
AOX3	-0.20645	1.08711	-0.880662
ap	1.15096	-0.495091	-0.655872
AP-1-2beta	-0.862101	1.09632	-0.234221
AP-1gamma	-1.06377	0.14291	0.920856
AP-1mu	-0.348115	1.12753	-0.779416
AP-1sigma	-1.15118	0.653607	0.497574
AP-2alpha	-1.0889	0.877192	0.211712
AP-2mu	-0.724092	1.141	-0.416907
AP-2sigma	-1.10654	0.839058	0.267484
Apc	-0.23724	1.09729	-0.860046
APC10	1.15132	-0.499174	-0.652144
Apc2	-0.569989	1.15467	-0.584681
APC4	1.05123	-0.111864	-0.939364
ApepP	1.14926	-0.477626	-0.671629
Apf	-0.616464	-0.537333	1.1538
aph-1	0.0789275	-1.03712	0.958197
aPKC	1.15424	-0.605362	-0.548878
Apl	0.805812	0.313334	-1.11915
Aplip1	-0.57735	-0.57735	1.1547
apolpp	1.13585	-0.387947	-0.747898
Apoltp	-0.587465	1.15464	-0.567176
app	-0.918845	-0.146212	1.06506
APP-BP1	1.15465	-0.586646	-0.568004
Appl	1.1547	-0.57735	-0.57735
Aprt	-0.514259	-0.638222	1.15248
Aps	-0.67114	-0.478173	1.14931
apt	1.11181	-0.285885	-0.825924
aqz	-0.931522	-0.125171	1.05669
ara	1.1547	-0.57735	-0.57735
aralar1	-1.10441	0.844103	0.26031
Arc1	-1.15232	0.640368	0.51195
Arc2	-0.794089	-0.32895	1.12304
Arc42	-1.06736	0.915202	0.152157
Archease	-1.13448	0.753552	0.380931
Arf102F	0.935553	-1.05391	0.118359
Arf51F	-1.13067	0.76827	0.362405
Arf79F	-1.151	0.655518	0.495479
ArfGAP1	-1.11607	0.814529	0.301542
ArfGAP3	-0.954052	1.04035	-0.086302
Arfip	1.03865	-0.956254	-0.0823933
Arfrp1	0.828414	-1.11084	0.282427
arg	-0.537588	1.15381	-0.616219
Argk	1.15428	-0.550274	-0.60401
Argl	1.15446	-0.556823	-0.597637
ArgRS	1.09462	-0.228948	-0.865673
ArgRS-m	-0.713966	1.14292	-0.428949
ari-1	1.14965	-0.66827	-0.481378
ari-2	0.811173	0.306101	-1.11727
Arl1	-1.11607	0.301541	0.81453
Arl2	1.15444	-0.598274	-0.556171
Arl4	1.15462	-0.565638	-0.588984
Arl5	-1.0447	0.0963793	0.948321
Arl6	0	0	0
Arl6IP1	-0.167609	1.07321	-0.905605
Arl8	-0.432708	1.14349	-0.710777
arm	-0.900798	1.07604	-0.175239
armi	1.01965	-0.040533	-0.979117
Arp1	-1.00588	0.994015	0.0118646
Arp10	-1.07249	0.906815	0.165676
Arp2	-0.806476	1.11892	-0.312442
Arp3	-1.1547	0.578901	0.575798
Arp5	-0.088616	1.04136	-0.952743
Arp53D	1.1522	-0.51033	-0.64187
Arp6	-1.10026	0.853554	0.246709
Arp8	-0.377552	-0.756259	1.13381
Arpc1	-0.538293	1.15384	-0.615546
Arpc2	0.764537	-1.13168	0.367139
Arpc3A	-0.996521	1.00344	-0.00692276
Arpc3B	-1.15044	0.489376	0.661062
Arpc4	-1.08534	0.201298	0.884039
Arpc5	-1.12923	0.355716	0.773509
arr	0.732755	0.406476	-1.13923
Ars2	0.838481	-1.10678	0.268301
Art1	-1.1473	0.460613	0.686687
Art3	-0.997304	-0.00537055	1.00267
Art4	0.659923	-1.15056	0.490633
Art7	1.15148	-0.501133	-0.650349
Art8	-0.617035	-0.536735	1.15377
Arts	-0.670945	1.14934	-0.478392
aru	-1.12613	0.784125	0.342009
Arv1	-0.855731	1.09928	-0.243546
arx	-0.892405	-0.188392	1.0808
Asap	-0.717736	1.14222	-0.424484
Asator	0.308728	0.809231	-1.11796
Asciz	1.12862	-0.352995	-0.77563
asf1	-1.11627	0.302296	0.813975
ash1	0.486966	0.663241	-1.15021
ash2	-0.883646	-0.201899	1.08554
Ask1	0.779612	0.347862	-1.12747
asl	1.14606	-0.450956	-0.695108
AsnRS	1.08418	-0.197981	-0.886201
AsnRS-m	-0.968966	-0.0594175	1.02838
AsnS	-0.57735	1.1547	-0.57735
asp	0.628427	0.52472	-1.15315
Asph	1.13911	-0.405765	-0.733342
ASPP	0	0	0
AspRS	-0.285111	1.11159	-0.826482
AspRS-m	1.14912	-0.476405	-0.67272
asrij	1.14112	-0.723476	-0.417644
asRNA:ASTR	1.15452	-0.559367	-0.595149
asRNA:CR17025	-0.57735	-0.57735	1.1547
asRNA:CR31144	1.15192	-0.645303	-0.506618
asRNA:CR31514	-0.57735	1.1547	-0.57735
asRNA:CR31912	1.15247	-0.638406	-0.51406
asRNA:CR32252	1.1542	-0.547534	-0.606662
asRNA:CR33945	-0.136141	1.0611	-0.924955
asRNA:CR42254	0.190188	0.891249	-1.08144
asRNA:CR42547	0.92778	0.131441	-1.05922
asRNA:CR42738	1.14971	-0.481998	-0.667713
asRNA:CR42871	-0.57735	1.1547	-0.57735
asRNA:CR43152	1.15417	-0.546774	-0.607396
asRNA:CR43159	1.15418	-0.607228	-0.546948
asRNA:CR43257	-0.654495	-0.496602	1.1511
asRNA:CR43425	0	0	0
asRNA:CR43426	0.71505	0.427668	-1.14272
asRNA:CR43460	0	0	0
asRNA:CR43463	1.08232	-0.192672	-0.889645
asRNA:CR43465	-0.702361	-0.442556	1.14492
asRNA:CR43466	1.1516	-0.649041	-0.502559
asRNA:CR43468	-0.57735	-0.57735	1.1547
asRNA:CR43474	-0.621019	-0.532552	1.15357
asRNA:CR43476	1.15281	-0.519251	-0.633562
asRNA:CR43480	1.13083	-0.767679	-0.363155
asRNA:CR43481	1.15235	-0.512459	-0.639895
asRNA:CR43629	-0.57735	-0.57735	1.1547
asRNA:CR43637	1.15459	-0.563315	-0.591273
asRNA:CR43683	-0.57735	-0.57735	1.1547
asRNA:CR43723	-0.944388	1.04761	-0.103218
asRNA:CR43730	-0.57735	1.1547	-0.57735
asRNA:CR43767	-0.57735	-0.57735	1.1547
asRNA:CR43786	0	0	0
asRNA:CR43787	-0.57735	1.1547	-0.57735
asRNA:CR43809	-0.475959	1.14908	-0.673117
asRNA:CR43812	1.1131	-0.290564	-0.82254
asRNA:CR43824	1.15406	-0.543832	-0.610232
asRNA:CR43833	1.08935	-0.21302	-0.876326
asRNA:CR43864	-0.678284	-0.470146	1.14843
asRNA:CR43868	-0.333645	1.12417	-0.790523
asRNA:CR43875	-0.605685	1.15423	-0.548544
asRNA:CR43889	1.05423	-0.935102	-0.119124
asRNA:CR43906	-0.760147	1.13282	-0.372676
asRNA:CR43916	-0.454794	1.14657	-0.691772
asRNA:CR43933	1.04239	-0.0909929	-0.951394
asRNA:CR43944	-0.79848	1.12161	-0.323132
asRNA:CR43957	-1.14489	0.442383	0.70251
asRNA:CR43964	-0.648628	1.15164	-0.503008
asRNA:CR43981	-0.57735	-0.57735	1.1547
asRNA:CR44019	1.13282	-0.760156	-0.372665
asRNA:CR44021	0	0	0
asRNA:CR44029	-0.624868	-0.528492	1.15336
asRNA:CR44030	-0.188211	-0.892521	1.08073
asRNA:CR44031	-0.646444	1.15182	-0.505381
asRNA:CR44045	1.13411	-0.379048	-0.755061
asRNA:CR44046	1.13617	-0.746502	-0.389672
asRNA:CR44047	-0.57735	-0.57735	1.1547
asRNA:CR44049	1.14098	-0.724209	-0.416767
asRNA:CR44053	1.15401	-0.542479	-0.611533
asRNA:CR44054	-0.638737	1.15244	-0.513704
asRNA:CR44064	-0.250128	1.10132	-0.851193
asRNA:CR44065	-0.57735	1.1547	-0.57735
asRNA:CR44067	-0.57735	-0.57735	1.1547
asRNA:CR44069	0	0	0
asRNA:CR44093	1.03969	-0.954909	-0.0847832
asRNA:CR44095	-0.611914	1.154	-0.542082
asRNA:CR44114	-0.57735	-0.57735	1.1547
asRNA:CR44116	1.15439	-0.554052	-0.60034
asRNA:CR44119	0.700435	-1.14523	0.444794
asRNA:CR44124	-0.57735	-0.57735	1.1547
asRNA:CR44134	-0.810305	1.11758	-0.307276
asRNA:CR44137	0	0	0
asRNA:CR44147	1.12916	-0.355414	-0.773745
asRNA:CR44160	1.15302	-0.630398	-0.522624
asRNA:CR44168	-0.600362	1.15439	-0.554029
asRNA:CR44169	-0.57735	1.1547	-0.57735
asRNA:CR44176	1.15172	-0.647636	-0.504086
asRNA:CR44179	-0.368753	1.13201	-0.76326
asRNA:CR44182	1.15124	-0.498274	-0.652967
asRNA:CR44201	1.03166	-0.0666487	-0.965008
asRNA:CR44224	0.973463	0.0511137	-1.02458
asRNA:CR44228	1.15294	-0.521333	-0.631611
asRNA:CR44266	-0.455647	1.14668	-0.691028
asRNA:CR44267	1.13249	-0.37104	-0.761448
asRNA:CR44291	0.995451	0.00903703	-1.00449
asRNA:CR44321	0	0	0
asRNA:CR44340	-0.57735	-0.57735	1.1547
asRNA:CR44367	-0.322939	1.12156	-0.798626
asRNA:CR44368	-0.25215	1.10194	-0.849791
asRNA:CR44370	1.15192	-0.506547	-0.645368
asRNA:CR44372	0.630528	-1.15301	0.522486
asRNA:CR44374	1.1547	-0.57735	-0.57735
asRNA:CR44375	-0.57735	-0.57735	1.1547
asRNA:CR44381	-0.57735	-0.57735	1.1547
asRNA:CR44382	-0.57735	-0.57735	1.1547
asRNA:CR44386	-0.57735	1.1547	-0.57735
asRNA:CR44390	-0.646069	1.15186	-0.505787
asRNA:CR44416	1.14521	-0.444652	-0.700557
asRNA:CR44429	-0.884165	1.08527	-0.201105
asRNA:CR44431	-0.190851	1.08167	-0.890821
asRNA:CR44512	0	0	0
asRNA:CR44599	-1.11936	0.805194	0.314164
asRNA:CR44600	1.15434	-0.552016	-0.602319
asRNA:CR44690	-1.0462	0.099901	0.9463
asRNA:CR44703	-0.57735	1.1547	-0.57735
asRNA:CR44704	-0.966107	1.03076	-0.0646495
asRNA:CR44724	0	0	0
asRNA:CR44793	-0.812453	1.11682	-0.304365
asRNA:CR44806	-0.57735	-0.57735	1.1547
asRNA:CR44807	-0.57735	-0.57735	1.1547
asRNA:CR44841	-0.57735	1.1547	-0.57735
asRNA:CR44843	1.1514	-0.500187	-0.651216
asRNA:CR44849	0.188811	0.892136	-1.08095
asRNA:CR44872	-0.57735	1.1547	-0.57735
asRNA:CR44891	0	0	0
asRNA:CR44892	-0.57735	-0.57735	1.1547
asRNA:CR44910	-0.57735	-0.57735	1.1547
asRNA:CR44911	0.40406	0.734748	-1.13881
asRNA:CR44959	-0.57735	-0.57735	1.1547
asRNA:CR44960	-0.904336	1.07397	-0.169629
asRNA:CR44961	-0.57735	-0.57735	1.1547
asRNA:CR44962	-0.702588	1.14488	-0.442292
asRNA:CR44968	-0.57735	-0.57735	1.1547
asRNA:CR44969	-0.397825	1.13769	-0.739864
asRNA:CR44972	0	0	0
asRNA:CR44976	-0.586207	-0.568448	1.15466
asRNA:CR44981	-0.57735	1.1547	-0.57735
asRNA:CR44982	0	0	0
asRNA:CR44987	-0.594508	1.15453	-0.560021
asRNA:CR44989	-0.57735	1.1547	-0.57735
asRNA:CR44992	-0.57735	-0.57735	1.1547
asRNA:CR44996	-0.57735	-0.57735	1.1547
asRNA:CR44998	0	0	0
asRNA:CR45000	-0.57735	-0.57735	1.1547
asRNA:CR45007	-0.424624	1.14224	-0.717619
asRNA:CR45009	-0.57735	-0.57735	1.1547
asRNA:CR45026	1.15432	-0.551593	-0.60273
asRNA:CR45028	-0.615719	1.15383	-0.538112
asRNA:CR45044	-0.28765	1.1123	-0.824649
asRNA:CR45053	1.1427	-0.715164	-0.427533
asRNA:CR45108	-0.57735	-0.57735	1.1547
asRNA:CR45124	1.05295	-0.936925	-0.116028
asRNA:CR45126	-0.76528	1.13148	-0.366198
asRNA:CR45129	0.890264	0.191713	-1.08198
asRNA:CR45131	-0.57735	1.1547	-0.57735
asRNA:CR45132	0.666243	0.483635	-1.14988
asRNA:CR45135	1.1547	-0.57735	-0.57735
asRNA:CR45136	-0.57735	-0.57735	1.1547
asRNA:CR45139	-0.57735	1.1547	-0.57735
asRNA:CR45140	-0.57735	-0.57735	1.1547
asRNA:CR45141	-0.622226	1.15351	-0.53128
asRNA:CR45142	-0.595092	1.15452	-0.559425
asRNA:CR45145	1.13916	-0.406077	-0.733085
asRNA:CR45149	-0.8989	1.07713	-0.178232
asRNA:CR45160	-0.598039	1.15445	-0.556412
asRNA:CR45163	0	0	0
asRNA:CR45164	-0.970318	-0.0569319	1.02725
asRNA:CR45171	1.10374	-0.845675	-0.258062
asRNA:CR45175	-0.643999	1.15203	-0.50803
asRNA:CR45182	1.07805	-0.180752	-0.897297
asRNA:CR45185	0	0	0
asRNA:CR45189	-0.57735	-0.57735	1.1547
asRNA:CR45190	-0.57735	1.1547	-0.57735
asRNA:CR45195	-0.761894	1.13237	-0.370477
asRNA:CR45198	-0.632304	1.1529	-0.520594
asRNA:CR45202	-0.57735	1.1547	-0.57735
asRNA:CR45208	-0.57735	-0.57735	1.1547
asRNA:CR45210	0	0	0
asRNA:CR45214	-0.588744	1.15463	-0.565881
asRNA:CR45264	-0.59625	1.15449	-0.558242
asRNA:CR45272	0	0	0
asRNA:CR45275	-0.643693	1.15205	-0.508361
asRNA:CR45281	1.15229	-0.511519	-0.640768
asRNA:CR45326	1.09196	-0.220829	-0.871128
asRNA:CR45350	-0.671395	1.14928	-0.477888
asRNA:CR45366	-0.703877	-0.44079	1.14467
asRNA:CR45367	-0.57735	1.1547	-0.57735
asRNA:CR45396	-0.736009	-0.402527	1.13854
asRNA:CR45397	-0.57735	1.1547	-0.57735
asRNA:CR45445	-0.64716	-0.504603	1.15176
asRNA:CR45466	-0.790759	1.12409	-0.333336
asRNA:CR45467	-0.57735	1.1547	-0.57735
asRNA:CR45468	-0.57735	-0.57735	1.1547
asRNA:CR45479	-0.57735	-0.57735	1.1547
asRNA:CR45485	-0.57735	1.1547	-0.57735
asRNA:CR45501	-0.228837	-0.865747	1.09458
asRNA:CR45518	-0.57735	-0.57735	1.1547
asRNA:CR45520	-0.57735	1.1547	-0.57735
asRNA:CR45528	-1.05661	0.931637	0.124977
asRNA:CR45549	1.15397	-0.5413	-0.612665
asRNA:CR45600	0	0	0
asRNA:CR45604	-0.631281	1.15297	-0.521684
asRNA:CR45612	-0.57735	-0.57735	1.1547
asRNA:CR45620	0	0	0
asRNA:CR45682	1.1547	-0.57735	-0.57735
asRNA:CR45683	-0.756155	1.13384	-0.377682
asRNA:CR45686	1.15223	-0.510737	-0.641493
asRNA:CR45713	-0.57735	1.1547	-0.57735
asRNA:CR45714	-0.73624	-0.402246	1.13849
asRNA:CR45778	-0.587471	1.15464	-0.56717
asRNA:CR45789	-0.57735	1.1547	-0.57735
asRNA:CR45798	-0.636398	1.15261	-0.516216
asRNA:CR45800	0	0	0
asRNA:CR45804	-0.57735	1.1547	-0.57735
asRNA:CR45806	-0.57735	1.1547	-0.57735
asRNA:CR45813	-0.57735	-0.57735	1.1547
asRNA:CR45814	-0.57735	1.1547	-0.57735
asRNA:CR45815	-1.13951	0.731421	0.408091
asRNA:CR45818	-0.492166	1.1507	-0.658532
asRNA:CR45822	-0.57735	-0.57735	1.1547
asRNA:CR45827	1.14381	-0.434905	-0.708908
asRNA:CR45831	-0.57735	-0.57735	1.1547
asRNA:CR45835	-0.57735	-0.57735	1.1547
asRNA:CR45865	-1.02819	0.969197	0.0589941
asRNA:CR45870	-0.57735	-0.57735	1.1547
asRNA:CR45871	-0.679659	-0.468594	1.14825
asRNA:CR45873	-0.600845	1.15438	-0.553532
asRNA:CR45874	-1.10287	0.25521	0.847665
asRNA:CR45875	-0.57735	-0.57735	1.1547
asRNA:CR45889	-0.57735	1.1547	-0.57735
asRNA:CR45891	-0.57735	-0.57735	1.1547
asRNA:CR45892	0	0	0
asRNA:CR45895	-0.486608	1.15017	-0.663564
asRNA:CR45896	-0.57735	-0.57735	1.1547
asRNA:CR45907	-1.14054	0.726423	0.414113
asRNA:CR45908	0.963576	-1.03282	0.0692485
asRNA:CR45912	0	0	0
asRNA:CR45925	-0.589933	1.15461	-0.564675
asRNA:CR45926	-0.663658	1.15016	-0.486504
asRNA:CR45928	-0.0536562	1.02575	-0.972092
asRNA:CR45929	-0.620863	1.15358	-0.532715
asRNA:CR45943	-0.743455	-0.393423	1.13688
asRNA:CR45951	-0.57735	1.1547	-0.57735
asRNA:CR45952	-0.61018	-0.543886	1.15407
asRNA:CR45968	0.267075	0.839347	-1.10642
asRNA:CR45969	-0.607358	-0.546813	1.15417
asRNA:CR45970	0	0	0
asRNA:CR45999	-0.434538	1.14376	-0.709221
asRNA:CR46018	0	0	0
asRNA:CR46020	-0.57735	1.1547	-0.57735
asRNA:CR46029	-0.792507	1.12354	-0.331036
asRNA:CR46033	1.15361	-0.533382	-0.620229
asRNA:CR46044	1.13701	-0.394136	-0.742875
asRNA:CR46048	0.518849	0.633938	-1.15279
asRNA:CR46050	1.15232	-0.511931	-0.640386
asRNA:CR46055	-0.57735	-0.57735	1.1547
asRNA:CR46067	-0.594067	1.15454	-0.56047
asRNA:CR46081	-0.57735	1.1547	-0.57735
asRNA:CR46089	-1.10754	0.270901	0.836639
asRNA:CR46091	1.15429	-0.550369	-0.603918
asRNA:CR46093	-0.57735	-0.57735	1.1547
asRNA:CR46096	0	0	0
asRNA:CR46097	-0.446536	1.14547	-0.698933
asRNA:CR46099	-0.711829	1.1433	-0.43147
asRNA:CR46104	-0.581531	1.15469	-0.573159
asRNA:CR46105	1.14122	-0.722945	-0.418279
asRNA:CR46109	0.909468	-1.07089	0.161425
asRNA:CR46133	-0.511997	1.15232	-0.640324
asRNA:CR46134	0.756975	0.376656	-1.13363
asRNA:CR46135	-0.539701	1.1539	-0.614198
asRNA:CR46137	0	0	0
asRNA:CR46138	-0.57735	1.1547	-0.57735
asRNA:CR46140	0.406389	0.732827	-1.13922
asRNA:CR46145	1.15297	-0.521772	-0.631199
asRNA:CR46255	-0.57735	1.1547	-0.57735
asRNA:CR46262	-0.57735	1.1547	-0.57735
asRNA:CR46354	-0.57735	1.1547	-0.57735
ast	1.06224	-0.139026	-0.923213
AstA	-0.57735	1.1547	-0.57735
AstA-R1	-0.608153	-0.545989	1.15414
asun	-0.757239	1.13356	-0.376326
Asx	1.11535	-0.298848	-0.816504
Atac1	1.15303	-0.630283	-0.522747
Atac2	1.15442	-0.555287	-0.599136
Atac3	1.15355	-0.532102	-0.621445
ATbp	-0.285287	1.11164	-0.826355
Ate1	0.598771	0.555662	-1.15443
Atet	-0.626613	1.15326	-0.526645
Atf-2	1.15244	-0.513618	-0.638818
Atf3	-1.1511	0.654411	0.496694
Atf6	-1.14908	0.673058	0.476025
Atg1	-1.14215	0.718131	0.424016
Atg10	-0.883372	1.08569	-0.202317
Atg101	-1.15393	0.613407	0.540526
Atg12	1.15449	-0.596548	-0.557937
Atg13	-0.248948	1.10096	-0.852008
Atg14	0.248693	0.852185	-1.10088
Atg16	1.14057	-0.41432	-0.72625
Atg17	-1.11825	0.80841	0.309837
Atg18a	-1.14324	0.712187	0.431048
Atg18b	-0.559775	1.15452	-0.594749
Atg2	0.974393	0.0493846	-1.02378
Atg3	-0.440247	1.14459	-0.704342
Atg4a	-1.15295	0.631507	0.521443
Atg4b	-0.375373	1.13337	-0.757999
Atg5	-0.871305	1.09187	-0.220564
Atg6	1.14224	-0.424636	-0.717609
Atg7	-1.11713	0.811584	0.305544
Atg8a	-0.0948949	-0.94917	1.04406
Atg8b	1.15347	-0.530638	-0.622835
Atg9	-0.437326	1.14417	-0.706842
atilla	-0.565097	1.15461	-0.589518
atk	-0.704308	-0.440287	1.14459
atl	1.07811	-0.180935	-0.89718
atms	-0.304056	1.11674	-0.81268
Atox1	-0.388693	1.13599	-0.747295
ATP6AP2	0.992151	0.0155173	-1.00767
ATP7	0.252848	0.849307	-1.10215
ATP8A	1.0049	-0.00987373	-0.995027
ATP8B	-1.10027	0.853536	0.246736
Atpalpha	-1.06228	0.923149	0.139132
ATPCL	1.11859	-0.311181	-0.807412
ATPsynB	1.05111	-0.111573	-0.939534
ATPsynbeta	0.285539	0.826174	-1.11171
ATPsynbetaL	1.15456	-0.561917	-0.592647
ATPsynC	0.0412866	-1.02	0.978717
ATPsynCF6	0.96778	0.0615925	-1.02937
ATPsynCF6L	1.15143	-0.500522	-0.650909
ATPsynD	0.944434	0.103137	-1.04757
ATPsyndelta	-0.0290837	1.01422	-0.985141
ATPsynE	1.05196	-0.93834	-0.113615
ATPsynepsilonL	1.152	-0.507602	-0.644395
ATPsynF	0.580344	-1.1547	0.574352
ATPsynG	0.108337	0.941421	-1.04976
ATPsyngamma	0.892954	0.187538	-1.08049
ATPsynGL	1.15322	-0.525928	-0.627289
ATPsynO	1.02465	-0.0512662	-0.973381
AttA	-0.57735	-0.57735	1.1547
AttB	-0.868289	-0.225064	1.09335
AttC	-0.643254	-0.508836	1.15209
AttD	-0.611495	1.15401	-0.542518
Atu	-0.758706	1.13319	-0.374486
Atx-1	-0.587528	-0.567113	1.15464
Atx2	1.11364	-0.292517	-0.821122
Atxn7	1.15405	-0.543554	-0.6105
aub	1.1543	-0.550852	-0.603449
aurA	1.1208	-0.319878	-0.800924
aurB	-0.586229	1.15465	-0.568426
aust	1.15381	-0.537557	-0.616249
aux	-0.441057	1.1447	-0.703648
ave	1.15292	-0.521002	-0.631922
Aven	0.0802233	0.957472	-1.0377
awd	-0.610719	-0.543325	1.15404
Awh	0	0	0
axed	-0.570788	1.15468	-0.583888
Axn	1.05	-0.108922	-0.94108
Axs	-1.06262	0.139991	0.922628
Axud1	-0.366679	-0.764901	1.13158
az2	-0.183523	1.07905	-0.895528
b	-0.57735	1.1547	-0.57735
B-H2	1.1545	-0.558795	-0.595709
B4	-1.13614	0.746626	0.389518
B52	-0.780405	-0.346837	1.12724
B9d1	1.1546	-0.564425	-0.59018
bab1	-0.57735	1.1547	-0.57735
bab2	0	0	0
babo	-1.02389	0.0496387	0.974256
babos	1.14779	-0.68311	-0.464684
Bacc	-1.0821	0.192055	0.890043
baf	-0.728359	-0.411785	1.14014
bai	-1.07275	0.166372	0.90638
Balat	0	0	0
Baldspot	-1.12598	0.341349	0.784632
ball	1.15309	-0.523748	-0.629342
bam	0.702428	0.442478	-1.14491
Bap111	-0.0915625	1.04263	-0.95107
Bap170	0.791937	0.331786	-1.12372
Bap55	-0.994646	-0.0106224	1.00527
Bap60	1.13869	-0.403388	-0.7353
barc	1.13901	-0.733807	-0.405201
bark	0.50658	0.645338	-1.15192
barr	1.04985	-0.108561	-0.94129
baz	-0.812882	1.11666	-0.303782
bb8	1.1511	-0.49663	-0.654469
bbc	1.11711	-0.811635	-0.305475
bbg	-0.212918	-0.876394	1.08931
BBIP1	-0.57735	1.1547	-0.57735
BBS8	0	0	0
bbx	-0.57735	1.1547	-0.57735
bc10	1.14752	-0.462392	-0.685126
BCAS2	1.13219	-0.762577	-0.369616
bchs	-1.04253	0.951211	0.0913142
BCL7-like	-0.981197	1.0178	-0.0366013
bcn92	-0.297895	-0.817202	1.1151
Bdbt	1.15402	-0.611432	-0.542584
bdg	0.997451	-1.00253	0.00507788
bdl	1.15462	-0.56523	-0.589386
Bdp1	-0.900163	1.0764	-0.17624
be	-1.13609	0.746839	0.389255
BEAF-32	-1.12915	0.355356	0.77379
beag	0.145005	0.919582	-1.06459
beat-Ib	0	0	0
beat-Ic	0	0	0
beat-IIIc	-0.57735	-0.57735	1.1547
beat-VI	-0.57735	1.1547	-0.57735
beat-VII	0	0	0
beg	-0.780613	1.12718	-0.346567
bel	-0.747063	-0.388979	1.13604
Bem46	1.05979	-0.926924	-0.132868
ben	-0.924576	1.06135	-0.136769
Best1	-0.9173	-0.148738	1.06604
Best2	-0.57735	-0.57735	1.1547
Bet1	1.1547	-0.574356	-0.58034
Bet3	1.14131	-0.722527	-0.418778
Bet5	-1.15239	0.512897	0.639488
beta-Man	-1.15097	0.655842	0.495125
beta-PheRS	-1.02494	0.0519012	0.973039
beta-Spec	1.13859	-0.402859	-0.735736
beta'COP	1.11735	-0.30638	-0.810967
beta3GalTII	-1.12169	0.798244	0.323447
beta4GalNAcTA	-0.686029	1.14739	-0.461363
beta4GalNAcTB	-1.121	0.800328	0.320674
beta4GalT7	0.957079	0.0809238	-1.038
betaCOP	-1.14928	0.671428	0.477852
betaggt-I	-1.10767	0.271336	0.836331
betaggt-II	-1.00268	0.997299	0.0053805
betaGlu	-1.11877	0.311858	0.80691
betaTub56D	-1.11436	0.295164	0.819196
betaTub60D	-0.691232	1.14665	-0.455413
betaTub85D	1.1524	-0.513077	-0.639321
betaTub97EF	-1.12303	0.79411	0.328922
Bgb	-0.0706637	1.03346	-0.962794
bgcn	1.15367	-0.5347	-0.618975
bgm	-0.11298	-0.938712	1.05169
BHD	1.15336	-0.528588	-0.624776
bi	1.15375	-0.536331	-0.61742
BI-1	0.876836	0.21225	-1.08909
bib	1.14596	-0.450192	-0.69577
bic	0.439513	-1.14448	0.704971
BicD	-0.699343	-0.44606	1.1454
bif	-1.1362	0.3898	0.746398
BigH1	1.15395	-0.540873	-0.613074
bigmax	-1.07842	0.896637	0.181785
Bin1	-0.986445	-0.0265797	1.01302
bin3	-0.812439	-0.304384	1.11682
bip1	0.746952	-1.13607	0.389117
bip2	1.07969	-0.894386	-0.185307
Bka	-0.650628	-0.50083	1.15146
blanks	1.15111	-0.496769	-0.654342
Blimp-1	-0.57735	-0.57735	1.1547
Blm	1.05536	-0.121905	-0.933459
Blos1	-1.0563	0.932098	0.124201
Blos2	0.869471	-1.09277	0.223303
Blos3	-0.86191	1.09641	-0.234502
Blos4	1.14663	-0.455288	-0.691341
blot	-0.57735	-0.57735	1.1547
blow	-0.504487	1.15175	-0.647267
blp	1.15271	-0.635089	-0.517618
blw	-0.876485	-0.21278	1.08927
bma	-0.57735	1.1547	-0.57735
Bmcp	-0.730746	1.13965	-0.408905
bmm	1.13903	-0.405336	-0.733696
bnb	-0.28957	1.11283	-0.82326
bnl	0.0400631	0.979366	-1.01943
boca	-1.05327	0.116803	0.936469
bocks	0.602396	0.551937	-1.15433
BOD1	1.15413	-0.60863	-0.545495
boi	0.159278	0.910802	-1.07008
bol	1.15382	-0.537758	-0.616058
Bom1	-0.57735	1.1547	-0.57735
Bom3	-0.57735	1.1547	-0.57735
bon	-0.913716	1.06828	-0.154569
bond	1.15372	-0.535553	-0.618163
bonsai	1.15352	-0.621938	-0.531584
bor	0.680836	-1.1481	0.467262
bora	1.15255	-0.515281	-0.63727
BORCS5	1.15441	-0.554826	-0.599586
BORCS6	1.08316	-0.195068	-0.888093
BORCS7	-1.15464	0.567074	0.587566
borr	0.792238	0.33139	-1.12363
botv	-0.691013	1.14668	-0.455665
bou	-0.972462	1.02543	-0.0529704
bowl	0	0	0
BoYb	0.955485	0.0837612	-1.03925
br	-1.10195	0.849762	0.252193
Br140	0.934878	0.119504	-1.05438
brat	-0.938322	-0.113647	1.05197
Brca2	-0.694014	-0.452217	1.14623
Brd	-0.57735	-0.57735	1.1547
Brd8	1.13804	-0.399745	-0.738292
Bre1	-0.984595	-0.0301286	1.01472
Brf	-0.907177	1.07227	-0.165098
brk	-0.57735	-0.57735	1.1547
brm	-1.12105	0.800191	0.320856
Brms1	-1.14898	0.475045	0.673932
brn	-1.14158	0.420458	0.72112
brp	0.98758	0.0243931	-1.01197
bru1	1.15371	-0.535433	-0.618277
bru2	1.15468	-0.571705	-0.582978
bru3	-0.343635	1.12651	-0.782874
Bruce	-0.901528	1.07561	-0.174085
brun	-0.475266	1.149	-0.673735
brv3	1.15039	-0.488859	-0.66153
BRWD3	1.11548	-0.816156	-0.299324
brwl	0.738332	0.399696	-1.13803
bs	-0.775269	1.12873	-0.353459
bsf	-1.14603	0.695363	0.450662
Bsg	-1.03909	0.955685	0.0834058
Bsg25D	-1.05791	0.12819	0.929724
bsk	-0.953997	1.0404	-0.086399
bt	-0.642795	1.15213	-0.509332
BTBD9	1.0186	-0.038295	-0.980302
BtbVII	0.81934	0.294965	-1.11431
btd	-0.57735	-0.57735	1.1547
BthD	-1.12361	0.331329	0.792285
Btk29A	-1.12299	0.794243	0.328746
btl	-0.684727	1.14757	-0.462846
btsz	-0.426832	1.14259	-0.715756
btz	-0.647634	1.15172	-0.504089
Bub1	1.1218	-0.323897	-0.797905
Bub3	1.15429	-0.603668	-0.550627
BubR1	0.403855	0.734916	-1.13877
bug	1.15461	-0.564461	-0.590144
Bug22	1.15296	-0.631378	-0.521581
BuGZ	-1.0272	0.970376	0.056825
bun	1.12367	-0.792094	-0.331579
bur	-0.854054	-0.245984	1.10004
bves	0.287817	0.824529	-1.11235
bw	-0.606625	1.1542	-0.547572
bwa	0.79259	0.330926	-1.12352
Bx	0.480643	0.66893	-1.14957
Bx42	-1.14335	0.431837	0.711517
by	-0.57735	1.1547	-0.57735
bys	-1.01142	0.988171	0.0232532
c(2)M	0.956884	0.0812716	-1.03816
c(3)G	-0.895238	1.07921	-0.183976
c11.1	-0.71932	1.14192	-0.422602
c12.1	0.838938	-1.10659	0.267654
c12.2	-0.472252	-0.676417	1.14867
C1GalTA	-0.718858	1.14201	-0.423151
C3G	-1.12685	0.781716	0.345138
ca	1.14658	-0.45493	-0.691653
Ca-alpha1D	1.15419	-0.547253	-0.606933
Ca-alpha1T	-0.267778	1.10663	-0.83885
Ca-Ma2d	0	0	0
CaBP1	-1.15466	0.585626	0.569035
cac	-0.57735	1.1547	-0.57735
cact	-1.08655	0.881736	0.204815
cactin	-0.953323	1.04091	-0.0875913
Cad86C	-0.57735	-0.57735	1.1547
Cad87A	-0.868901	1.09305	-0.224153
Cad96Ca	-0.658224	-0.492506	1.15073
Cad99C	-0.57735	-0.57735	1.1547
CadN	0.538512	0.615336	-1.15385
CadN2	1.15459	-0.563765	-0.59083
Cadps	1.07529	-0.17322	-0.902074
Caf1-105	1.15269	-0.635392	-0.517294
Caf1-180	-1.15366	0.534402	0.619259
Caf1-55	-0.174179	1.07565	-0.901468
cag	0.368263	-1.13191	0.763648
CAH1	1.10486	-0.843047	-0.261817
CAH13	1.1541	-0.544821	-0.60928
CAH2	0.550955	0.603349	-1.1543
CAH3	-0.905765	1.07312	-0.167353
CAH7	0	0	0
CAHbeta	-0.650662	1.15145	-0.500792
cal1	1.09533	-0.864187	-0.231145
CalpA	-0.861283	1.09671	-0.235425
CalpB	-0.961282	1.03467	-0.0733913
CalpC	1.0328	-0.963612	-0.069183
Calr	0.469252	0.679077	-1.14833
Cals	-0.805868	1.11913	-0.313259
Calx	1.15464	-0.566705	-0.587931
calypso	0.896997	0.181222	-1.07822
Cam	-1.14693	0.457686	0.689249
CaMKI	-1.14902	0.475397	0.673618
CaMKII	1.00559	-0.994316	-0.0112729
Camp	1.15062	-0.491366	-0.659259
Camta	1.15131	-0.499132	-0.652182
can	1.15424	-0.548761	-0.605475
cana	1.15443	-0.555757	-0.598678
CanA-14F	-1.14434	0.705849	0.438488
CanB	-0.57735	1.1547	-0.57735
CanB2	-0.928358	1.05883	-0.130476
Cand1	1.15399	-0.612016	-0.541977
CAP	-0.608649	-0.545476	1.15412
Cap-D2	-0.796922	1.12212	-0.325201
Cap-D3	-1.00224	0.997742	0.00450174
Cap-G	-0.694262	1.14619	-0.451931
Cap-H2	-0.59961	1.15441	-0.5548
Caper	1.15468	-0.570858	-0.583819
Capr	1.15426	-0.549569	-0.604693
caps	-0.693693	1.14628	-0.452586
capt	-1.14207	0.718536	0.423534
capu	-0.522341	-0.630665	1.15301
car	-1.15445	0.598111	0.556338
CARPB	-0.57735	1.1547	-0.57735
CarT	0.813911	0.302384	-1.11629
CASK	-1.06502	0.918902	0.146119
casp	0.802499	0.317775	-1.12027
cass	0.762347	0.369906	-1.13225
Cat	-0.417383	1.14108	-0.723694
cathD	-0.952101	1.04185	-0.0897485
Catsup	-1.00834	0.991442	0.0169011
caup	1.15446	-0.557019	-0.597446
cav	1.08787	-0.879201	-0.208669
caz	-1.047	0.945208	0.101797
cbc	1.07705	-0.899047	-0.177999
Cbl	0.908864	0.162395	-1.07126
CBP	-0.57735	1.1547	-0.57735
Cbp20	1.15466	-0.569206	-0.585456
Cbp53E	-0.947334	1.04543	-0.0981009
Cbp80	-1.03562	0.960092	0.0755325
cbs	1.07488	-0.172104	-0.902778
Cbs	-1.13711	0.742431	0.394681
cbt	-1.06291	0.140732	0.922179
Cby	1.15469	-0.574202	-0.580493
Cc2d2a	1.13441	-0.380546	-0.753861
CCAP	0.48607	0.66405	-1.15012
CCDC53	1.15442	-0.599338	-0.55508
Ccdc56	-1.11216	0.287151	0.82501
Ccdc58	-0.633782	-0.519016	1.1528
Ccdc85	1.13923	-0.732749	-0.406483
CCHa2	-0.57735	1.1547	-0.57735
Cchl	1.14736	-0.686252	-0.461108
Ccm3	0.642316	0.509849	-1.15216
Ccs	-1.15421	0.606191	0.548021
CCT1	0.0975112	0.947672	-1.04518
CCT2	-1.07371	0.168945	0.904766
CCT3	0.544605	0.609487	-1.15409
CCT4	1.10659	-0.838949	-0.267638
CCT5	0.854846	0.244834	-1.09968
CCT6	0.743838	0.392953	-1.13679
CCT7	0.127315	0.930245	-1.05756
CCT8	1.1514	-0.651282	-0.500115
Ccz1	-0.605223	1.15424	-0.549022
cd	-0.57735	-0.57735	1.1547
CD98hc	-1.01255	0.0255894	0.98696
Cda5	-0.57735	1.1547	-0.57735
CDase	-0.726877	1.14044	-0.413567
cdc14	0.921903	0.141187	-1.06309
Cdc16	1.14429	-0.706121	-0.43817
Cdc23	0.933173	0.122388	-1.05556
Cdc27	1.14451	-0.439683	-0.704825
Cdc2rk	0.652103	0.499218	-1.15132
Cdc37	1.07631	-0.900324	-0.175988
Cdc42	-0.432913	1.14352	-0.710603
CDC45L	-1.1128	0.823332	0.289471
Cdc5	-0.653919	1.15115	-0.497233
CDC50	-1.04977	0.941405	0.108364
Cdc6	1.05583	-0.123057	-0.932777
Cdc7	1.15453	-0.560313	-0.594222
Cdep	-0.910153	1.07048	-0.160322
CdGAPr	0.780089	0.347245	-1.12733
cdi	1.15449	-0.558159	-0.596331
cDIP	0	0	0
Cdk1	1.15395	-0.540846	-0.6131
Cdk12	1.14201	-0.718859	-0.423151
Cdk2	-0.973295	1.02472	-0.0514256
CDK2AP1	-1.0881	0.878764	0.209332
Cdk4	-1.12627	0.783675	0.342594
Cdk5	-0.834032	-0.274571	1.1086
Cdk5alpha	1.15463	-0.56646	-0.588172
Cdk7	0.224237	-1.09308	0.868844
Cdk8	-0.787217	1.12519	-0.337976
Cdk9	1.15362	-0.62014	-0.533476
Cdlc2	1.15178	-0.504757	-0.647018
cdm	-0.85772	1.09837	-0.240645
Cds	0.649918	0.501603	-1.15152
Cec2	-0.57735	-0.57735	1.1547
CecA1	-0.64407	-0.507953	1.15202
CecA2	-0.629646	-0.523425	1.15307
CecB	-0.721484	-0.420024	1.14151
CecC	-1.11741	0.306616	0.810793
Ced-12	-0.920723	1.06385	-0.14313
ced-6	-1.07893	0.895745	0.183183
Cen	0.204806	0.881742	-1.08655
CenB1A	-1.08171	0.890744	0.190971
CenG1A	-0.451206	-0.694891	1.1461
Cenp-C	1.05483	-0.120606	-0.934227
Cep135	1.15431	-0.551126	-0.603183
cep290	1.15467	-0.569719	-0.584948
Cep89	1.15469	-0.573785	-0.580908
Cep97	1.14371	-0.434206	-0.709503
cer	-1.01662	0.982504	0.0341185
Cerk	1.00861	-0.0174497	-0.991161
cert	-0.993103	1.00676	-0.0136547
cerv	-0.156655	1.06908	-0.912427
Cf2	-0.187864	1.08061	-0.892744
Cfp1	1.0553	-0.12176	-0.933545
cg	1.07657	-0.899875	-0.176695
CG10005	-0.692695	-0.453734	1.14643
CG10011	1.14672	-0.456026	-0.690698
CG10026	-0.57735	1.1547	-0.57735
CG10031	-0.57735	1.1547	-0.57735
CG10038	1.14747	-0.462006	-0.685465
CG10041	-0.57735	1.1547	-0.57735
CG10050	-0.180801	-0.897265	1.07807
CG10053	1.08699	-0.206086	-0.880901
CG10055	-0.639194	-0.513213	1.15241
CG10063	1.14802	-0.466576	-0.681441
CG10064	1.14939	-0.478915	-0.670477
CG10068	-0.860107	1.09726	-0.237152
CG10075	1.15462	-0.565602	-0.589019
CG10077	1.1183	-0.310059	-0.808245
CG10082	-1.07525	0.173088	0.902158
CG10086	1.15211	-0.509152	-0.642961
CG10089	1.14566	-0.447959	-0.697703
CG10096	-0.57735	-0.57735	1.1547
CG10098	-1.06638	0.14961	0.916766
CG10103	-0.973758	-0.0505647	1.02432
CG10126	0.991573	0.0166469	-1.00822
CG10132	-0.57735	1.1547	-0.57735
CG10137	0.206931	0.880346	-1.08728
CG10139	0.988269	-1.01133	0.0230635
CG10147	-0.57735	-0.57735	1.1547
CG10151	1.15454	-0.56057	-0.593969
CG10165	-0.789084	-0.335534	1.12462
CG10166	-0.943617	1.04817	-0.104551
CG10171	1.03952	-0.0843951	-0.955128
CG10184	-0.57735	-0.57735	1.1547
CG10185	1.1547	-0.57735	-0.57735
CG10188	-0.499311	1.15133	-0.652019
CG10189	0.154807	0.913569	-1.06838
CG10194	-1.14353	0.71052	0.433011
CG10195	-0.997497	-0.00498649	1.00248
CG10208	-0.749049	1.13557	-0.386524
CG10209	1.03941	-0.0841437	-0.95527
CG10214	-0.371234	-0.761293	1.13253
CG10222	-0.0899286	-0.951998	1.04193
CG10232	-0.326839	1.12252	-0.795686
CG10237	-1.09608	0.233476	0.862607
CG1024	1.12092	-0.320331	-0.800585
CG10252	1.15166	-0.503284	-0.648374
CG10254	1.1481	-0.467297	-0.680805
CG10265	0.92422	-1.06158	0.137359
CG10268	0.344201	0.782438	-1.12664
CG10274	-0.914541	1.06777	-0.15323
CG10283	-1.15123	0.653082	0.498148
CG10286	-1.10934	0.277136	0.832203
CG10307	1.15427	-0.549757	-0.604511
CG10311	-0.621304	1.15356	-0.532252
CG10321	-0.3889	1.13603	-0.747127
CG10324	-0.32153	-0.799685	1.12121
CG10333	-0.914873	-0.152691	1.06756
CG10336	0.36339	0.767494	-1.13088
CG10337	-1.11402	0.820105	0.293915
CG10338	0.736297	0.402176	-1.13847
CG10340	0.865687	-1.09461	0.228926
CG10341	-1.14295	0.713792	0.429154
CG10343	1.15314	-0.628552	-0.524588
CG10344	1.12447	-0.334898	-0.789569
CG10347	-0.299261	-0.816202	1.11546
CG10353	-1.13156	0.366562	0.764993
CG10359	-0.935186	1.05417	-0.118981
CG10361	1.1547	-0.57735	-0.57735
CG10365	0.632223	0.52068	-1.1529
CG10366	0.310411	0.807984	-1.11839
CG10375	-0.0334558	-0.982852	1.01631
CG10376	-0.95592	-0.0829883	1.03891
CG10383	1.15394	-0.540656	-0.613283
CG10384	0	0	0
CG10395	1.14168	-0.720572	-0.421112
CG10405	-0.57735	-0.57735	1.1547
CG10407	-0.732834	1.13921	-0.406381
CG10413	-0.514825	1.15252	-0.637694
CG10417	-0.295445	1.11444	-0.81899
CG10418	-0.100403	-0.946011	1.04641
CG10425	-0.732479	1.13929	-0.40681
CG10428	1.04889	-0.942627	-0.10626
CG10431	-0.518703	1.15278	-0.634075
CG10433	-1.0033	0.00663722	0.996665
CG10435	-0.584804	1.15467	-0.569864
CG10444	-0.658617	1.15069	-0.492073
CG10445	1.04295	-0.0922962	-0.950652
CG10462	0.576106	-1.1547	0.578593
CG10463	-1.02098	0.0433725	0.977608
CG10465	1.15375	-0.536253	-0.617495
CG10466	1.15314	-0.628468	-0.524676
CG10467	-0.791866	1.12375	-0.33188
CG10469	-0.549142	1.15425	-0.605107
CG10470	1.14185	-0.422147	-0.719702
CG10472	0	0	0
CG10492	1.15278	-0.518745	-0.634035
CG10494	0.571114	0.583564	-1.15468
CG10495	-0.732237	1.13934	-0.407103
CG10505	-0.787312	-0.337853	1.12516
CG10508	-0.608122	1.15414	-0.546022
CG10512	-1.14089	0.416269	0.724624
CG10516	1.07057	-0.909991	-0.160583
CG10527	-1.00178	0.00356403	0.998213
CG10543	-0.794238	1.12299	-0.328752
CG10550	0	0	0
CG10555	-1.12509	0.337519	0.787567
CG10561	1.15287	-0.520104	-0.632763
CG10565	1.15438	-0.600763	-0.553617
CG10576	0.0961935	-1.04462	0.948427
CG10581	0.940467	0.109975	-1.05044
CG10584	1.02927	-0.0613766	-0.967898
CG10589	1.15139	-0.500034	-0.651356
CG10600	1.15324	-0.626918	-0.526321
CG10602	-0.890818	1.08167	-0.190855
CG10616	1.11029	-0.280462	-0.829823
CG10621	-0.57735	1.1547	-0.57735
CG10623	1.13881	-0.404098	-0.734716
CG10628	-0.938754	-0.112908	1.05166
CG10631	0.844733	0.259411	-1.10414
CG10638	-0.683237	1.14778	-0.464539
CG10646	-0.881491	1.08668	-0.205188
CG10650	-0.57735	-0.57735	1.1547
CG10654	-0.664114	1.15011	-0.485998
CG10657	1.15375	-0.536331	-0.61742
CG10660	1.14788	-0.465426	-0.682455
CG10663	0	0	0
CG10669	1.04189	-0.0898349	-0.952052
CG10672	-1.13804	0.738263	0.399781
CG10674	-0.174633	-0.901181	1.07581
CG10681	1.11274	-0.289228	-0.823508
CG10694	1.15446	-0.556727	-0.59773
CG10702	-1.02207	0.976365	0.0457032
CG10730	1.15393	-0.540551	-0.613383
CG10731	0.441692	0.703103	-1.14479
CG10734	1.14885	-0.473886	-0.674964
CG10737	-1.10329	0.25657	0.846717
CG10738	1.1547	-0.57735	-0.57735
CG1074	1.15374	-0.617721	-0.536016
CG10747	-0.528751	1.15337	-0.624622
CG10764	-0.7965	1.12226	-0.32576
CG1077	-0.57735	1.1547	-0.57735
CG10778	-0.429059	-0.713873	1.14293
CG10795	-0.100808	1.04659	-0.945778
CG10799	0	0	0
CG10801	1.15462	-0.565564	-0.589057
CG10802	-1.0654	0.918306	0.147094
CG10803	1.13291	-0.373124	-0.759791
CG10804	0	0	0
CG10809	1.15404	-0.543227	-0.610814
CG10814	-0.57735	1.1547	-0.57735
CG10822	1.15403	-0.542851	-0.611176
CG10841	1.15455	-0.560885	-0.59366
CG10859	1.11104	-0.283153	-0.827892
CG10862	1.15441	-0.554779	-0.599631
CG10863	-1.1108	0.828524	0.282273
CG10866	1.11145	-0.284616	-0.826839
CG10869	1.15276	-0.518449	-0.634312
CG10874	1.14377	-0.70916	-0.434609
CG10877	-0.57735	1.1547	-0.57735
CG10889	-0.253987	1.1025	-0.848516
CG10898	1.08428	-0.198259	-0.88602
CG1090	-0.57735	1.1547	-0.57735
CG10903	-0.617831	-0.535901	1.15373
CG10904	-1.0448	0.948185	0.0966167
CG10907	0.553077	0.601288	-1.15437
CG10914	0.409433	0.730309	-1.13974
CG10916	0.640319	0.512002	-1.15232
CG1092	-0.59467	1.15453	-0.559856
CG10927	0.815933	-1.11556	0.299628
CG10931	1.15465	-0.567663	-0.586983
CG10932	-1.11611	0.814427	0.301681
CG10936	1.15442	-0.554986	-0.599429
CG10939	-0.13487	1.06059	-0.92572
CG10947	-0.753868	-0.380536	1.1344
CG10948	1.14507	-0.701441	-0.443626
CG10949	-0.233956	1.09624	-0.862281
CG10958	1.15469	-0.573272	-0.581419
CG10959	1.05074	-0.110694	-0.940047
CG10960	-0.88038	-0.206878	1.08726
CG10962	-0.664679	1.15005	-0.485372
CG10970	0.42822	0.714583	-1.1428
CG10973	1.13799	-0.738529	-0.399456
CG10979	1.15469	-0.581351	-0.573341
CG10984	1.1543	-0.603552	-0.550746
CG11000	-0.686612	-0.460699	1.14731
CG11007	1.08306	-0.194775	-0.888283
CG1103	1.04437	-0.0956063	-0.948763
CG11030	-1.0669	0.150966	0.915934
CG11034	-0.57735	-0.57735	1.1547
CG11035	0.140839	0.922114	-1.06295
CG1105	-0.569766	1.15467	-0.584901
CG11050	1.14507	-0.701423	-0.443647
CG11052	1.15453	-0.56024	-0.594293
CG11068	1.15256	-0.515491	-0.637074
CG11069	1.15416	-0.54648	-0.607679
CG11070	1.12359	-0.331239	-0.792353
CG11076	-0.799199	-0.322177	1.12138
CG11077	-1.10696	0.268917	0.838045
CG11089	-1.1522	0.510302	0.641897
CG11095	-0.583852	1.15468	-0.570824
CG11103	-0.55629	1.15445	-0.598158
CG11106	1.15318	-0.525251	-0.627926
CG11109	1.151	-0.655481	-0.49552
CG11110	0.954669	-1.03988	0.08521
CG11122	1.12985	-0.358596	-0.771258
CG11123	-1.09829	0.857878	0.240414
CG11125	1.15366	-0.53444	-0.619223
CG11127	-1.03813	0.0812023	0.956923
CG11134	-1.15099	0.495435	0.655559
CG11137	1.06117	-0.924838	-0.136334
CG11141	1.15261	-0.636434	-0.516178
CG11151	-1.05254	0.937513	0.115027
CG11155	-0.57735	1.1547	-0.57735
CG11158	-0.958357	1.037	-0.0786422
CG1116	-0.166919	1.07296	-0.906037
CG11164	-1.04947	0.941825	0.10764
CG11168	1.03303	-0.0697048	-0.963324
CG11170	-0.463374	1.14764	-0.684262
CG11178	-1.02132	0.977226	0.0440887
CG11180	-1.0496	0.107962	0.941638
CG11200	-0.900637	1.07613	-0.175493
CG11236	-0.558818	-0.595686	1.1545
CG1124	1.11582	-0.300617	-0.815208
CG11241	-1.1356	0.386678	0.748924
CG11247	1.15469	-0.572415	-0.582272
CG11248	1.1526	-0.515977	-0.636621
CG11249	1.12252	-0.326815	-0.795704
CG11257	-1.1188	0.806831	0.311964
CG11267	0.0244783	-1.01201	0.987536
CG11275	0	0	0
CG11279	1.15459	-0.591432	-0.563153
CG1129	1.15429	-0.550545	-0.603747
CG11291	1.15221	-0.510397	-0.641808
CG11294	1.15433	-0.551716	-0.602611
CG11307	-1.03151	0.965189	0.066321
CG11309	-1.06127	0.924697	0.136568
CG11313	0	0	0
CG11318	-0.57735	-0.57735	1.1547
CG11319	1.15382	-0.615973	-0.537846
CG11322	1.15329	-0.527239	-0.626052
CG11327	1.15398	-0.541586	-0.612391
CG11334	-1.13509	0.751063	0.384026
CG11342	0.362654	-1.13073	0.768074
CG11350	0	0	0
CG11353	-0.624274	-0.529119	1.15339
CG11357	-1.11512	0.297991	0.817131
CG1136	1.1547	-0.57735	-0.57735
CG11360	1.15353	-0.621716	-0.531817
CG11362	1.15207	-0.508548	-0.64352
CG11367	1.15447	-0.557283	-0.597187
CG1137	1.15458	-0.562567	-0.592008
CG11373	1.15319	-0.525409	-0.627778
CG11374	-0.430565	1.14316	-0.712597
CG11377	-0.930508	1.05738	-0.126874
CG11378	0	0	0
CG11396	1.1254	-0.338855	-0.786545
CG11398	1.15454	-0.560795	-0.593749
CG11399	-0.0380698	1.01849	-0.980421
CG11400	-0.57735	-0.57735	1.1547
CG11403	-1.02644	0.971277	0.0551622
CG11406	-0.298589	1.11528	-0.816694
CG11413	-0.57735	1.1547	-0.57735
CG11414	1.14359	-0.433409	-0.710182
CG11417	-0.642992	-0.509119	1.15211
CG1142	-0.676466	-0.472197	1.14866
CG11426	1.1547	-0.57735	-0.57735
CG1143	-0.588216	-0.566416	1.15463
CG11436	-0.689727	1.14687	-0.457138
CG11438	1.15385	-0.538657	-0.615198
CG11444	0.979147	-1.01962	0.0404774
CG11447	-1.07208	0.9075	0.16458
CG11454	-1.00917	0.990566	0.0186092
CG11456	1.15443	-0.598972	-0.555455
CG1146	1.15408	-0.544144	-0.609931
CG11474	0.98257	0.0339941	-1.01656
CG11475	0.892518	0.188216	-1.08073
CG11486	-1.13525	0.384855	0.750395
CG11504	0.656525	0.494374	-1.1509
CG11523	-0.343411	1.12646	-0.783047
CG11537	1.10972	-0.831261	-0.278455
CG11539	0.911068	0.158849	-1.06992
CG11555	-1.05882	0.130447	0.928375
CG11560	0.957308	-1.03782	0.0805164
CG11562	1.13863	-0.403068	-0.735564
CG11563	-1.09554	0.231781	0.863756
CG11583	-1.01264	0.0257721	0.986865
CG11586	1.03281	-0.0692132	-0.963595
CG11590	-0.793503	1.12323	-0.329723
CG11593	1.13906	-0.733575	-0.405483
CG11594	1.15459	-0.563615	-0.590977
CG11596	-1.15464	0.566893	0.587745
CG11597	1.15469	-0.572226	-0.582459
CG11598	1.1547	-0.57735	-0.57735
CG11601	0.627924	-1.15318	0.525254
CG1161	-1.02099	0.977593	0.0434009
CG11619	0	0	0
CG11638	0.659498	-1.1506	0.491102
CG11655	-0.705288	1.14443	-0.439143
CG11656	1.15372	-0.535573	-0.618143
CG11658	1.1534	-0.529175	-0.624221
CG11663	1.15431	-0.551166	-0.603145
CG11674	-0.57735	-0.57735	1.1547
CG11679	-0.408365	-0.731194	1.13956
CG11686	-1.13347	0.375871	0.757602
CG11695	1.02958	-0.967528	-0.0620548
CG11696	1.12154	-0.322834	-0.798704
CG11699	-0.771596	1.12976	-0.358165
CG11700	1.15432	-0.551628	-0.602696
CG11710	-0.756095	1.13385	-0.377756
CG1172	1.15192	-0.64529	-0.506632
CG11722	1.08931	-0.212912	-0.876397
CG11723	1.10584	-0.265105	-0.840736
CG11737	0.841381	0.264188	-1.10557
CG11752	-1.14386	0.435257	0.708608
CG11753	-0.813999	-0.302264	1.11626
CG11755	1.06684	-0.150804	-0.916033
CG11756	1.15153	-0.501668	-0.649859
CG11760	-0.57735	1.1547	-0.57735
CG11768	-0.57735	1.1547	-0.57735
CG11771	0.025665	0.98692	-1.01259
CG11777	-1.07704	0.899051	0.177994
CG11779	1.15456	-0.593002	-0.561555
CG11781	1.14381	-0.434858	-0.708947
CG11786	1.15267	-0.517131	-0.635544
CG11788	-1.07159	0.163273	0.908316
CG11790	-1.15033	0.662086	0.488244
CG11791	-1.06702	0.151285	0.915738
CG11807	-0.408494	1.13958	-0.731087
CG11808	0.0425093	0.978067	-1.02058
CG11811	-1.15143	0.500506	0.650924
CG11815	1.15395	-0.540889	-0.613059
CG11825	-0.57735	-0.57735	1.1547
CG11835	0	0	0
CG11836	-0.853001	-0.247511	1.10051
CG11837	-1.05677	0.125362	0.931408
CG11839	0.0776522	-1.03656	0.95891
CG11842	-0.57735	1.1547	-0.57735
CG11852	-0.57735	1.1547	-0.57735
CG11854	-0.57735	1.1547	-0.57735
CG11857	-1.08021	0.186741	0.893466
CG11858	-0.648311	-0.503353	1.15166
CG11873	0.0211336	-1.0104	0.989266
CG11882	-0.508195	1.15204	-0.643847
CG11883	1.15447	-0.597002	-0.557473
CG11885	-0.0483225	-0.974963	1.02329
CG11893	-0.57735	1.1547	-0.57735
CG11899	-0.384187	1.13512	-0.750933
CG11902	0.0833195	0.955734	-1.03905
CG11906	1.15459	-0.56331	-0.591278
CG11911	0	0	0
CG11920	1.15067	-0.658845	-0.491822
CG11927	1.11826	-0.309894	-0.808367
CG11929	1.15442	-0.555262	-0.59916
CG11961	-0.376461	1.13359	-0.757131
CG11964	-1.10918	0.276581	0.8326
CG11970	0.626729	0.526522	-1.15325
CG11975	-0.869147	1.09293	-0.223786
CG11980	-1.00811	0.0164272	0.991685
CG11983	1.14923	-0.477413	-0.67182
CG11986	1.15468	-0.571347	-0.583333
CG11999	-0.819693	1.11417	-0.294481
CG12003	0	0	0
CG12004	1.1483	-0.679294	-0.469006
CG12007	-0.661225	-0.489196	1.15042
CG12010	-0.716623	1.14243	-0.425805
CG12012	-1.05514	0.933785	0.121353
CG12016	-0.57735	1.1547	-0.57735
CG12024	1.15276	-0.63439	-0.518366
CG12025	0.861329	0.235357	-1.09669
CG12054	-1.15307	0.629699	0.523368
CG12056	-1.01322	0.986239	0.0269762
CG12065	-1.07062	0.909916	0.160703
CG12071	-0.955472	-0.0837848	1.03926
CG12075	-0.57735	1.1547	-0.57735
CG1208	-0.155144	1.0685	-0.913361
CG12081	-0.610342	1.15406	-0.543718
CG12084	0.982246	0.0346097	-1.01686
CG12091	1.09833	-0.857796	-0.240535
CG12093	-1.02528	0.972643	0.0526357
CG12096	0.885934	0.198392	-1.08433
CG12099	0.440236	0.704351	-1.14459
CG12104	0.123601	0.932454	-1.05606
CG12105	-0.57735	-0.57735	1.1547
CG12106	-1.07308	0.90583	0.16725
CG12107	1.15158	-0.649221	-0.502362
CG12112	0.65898	-1.15065	0.491674
CG12116	0.954243	0.0859631	-1.04021
CG12118	1.15182	-0.505369	-0.646455
CG12121	-0.117068	1.05338	-0.936313
CG12123	0.149191	0.917023	-1.06621
CG12126	1.15346	-0.530401	-0.62306
CG12128	-0.820139	1.11401	-0.293868
CG12129	1.0737	-0.904792	-0.168903
CG1213	0.633649	0.519158	-1.15281
CG12133	-0.517566	-0.635137	1.1527
CG12134	-0.867771	-0.225834	1.09361
CG12155	-1.05697	0.125856	0.931114
CG12159	1.15204	-0.50817	-0.64387
CG12163	-1.13446	0.753652	0.380806
CG12170	1.04779	-0.103659	-0.944133
CG12171	-0.919713	1.0645	-0.144788
CG12173	-0.806943	-0.311813	1.11876
CG12177	-0.57735	1.1547	-0.57735
CG12179	1.14377	-0.43462	-0.70915
CG1218	0.258746	0.845197	-1.10394
CG12182	-0.0566319	1.02711	-0.970481
CG12184	1.15312	-0.524324	-0.6288
CG12194	-0.57735	1.1547	-0.57735
CG12204	-0.808459	1.11823	-0.30977
CG12206	-0.678463	1.14841	-0.469945
CG12209	1.15468	-0.570812	-0.583864
CG12213	-0.415821	1.14082	-0.724999
CG12219	0.836711	0.270801	-1.10751
CG12224	-0.57735	-0.57735	1.1547
CG12236	0.906118	0.166791	-1.07291
CG12237	-0.817366	-0.29767	1.11504
CG12241	-0.332282	1.12384	-0.79156
CG12253	1.15448	-0.596894	-0.557583
CG12259	1.15179	-0.646819	-0.504974
CG12267	-0.673708	-0.475296	1.149
CG1227	-1.14971	0.482023	0.667691
CG12279	-1.0146	0.0298674	0.984732
CG12288	1.09266	-0.869701	-0.222961
CG12290	-0.677682	1.14851	-0.470825
CG12299	-0.663294	1.1502	-0.486907
CG12301	-0.936514	-0.116727	1.05324
CG12316	-0.339592	1.12557	-0.78598
CG12320	1.00511	-0.994808	-0.010305
CG12321	1.15117	-0.497472	-0.6537
CG12325	-0.658171	-0.492565	1.15074
CG1233	-0.0679147	1.03223	-0.964312
CG12333	1.11822	-0.309734	-0.808486
CG12338	-0.765453	-0.365979	1.13143
CG1234	-0.80571	-0.313471	1.11918
CG12341	-0.337034	-0.787938	1.12497
CG12343	-0.0978165	1.04531	-0.947497
CG12344	1.15421	-0.606224	-0.547987
CG12355	1.15469	-0.572703	-0.581985
CG1236	-1.13652	0.745001	0.391522
CG12362	1.15368	-0.534897	-0.618787
CG12374	-0.57735	-0.57735	1.1547
CG12375	1.15353	-0.531828	-0.621706
CG12376	1.15397	-0.541484	-0.612488
CG12379	1.15161	-0.648939	-0.50267
CG12384	-1.07507	0.172625	0.902449
CG1239	1.12315	-0.793738	-0.329413
CG12391	-1.01608	0.0329795	0.983102
CG12446	1.15358	-0.532785	-0.620797
CG12448	1.13597	-0.388624	-0.747351
CG1246	-0.57735	-0.57735	1.1547
CG12470	1.15074	-0.4926	-0.658139
CG12493	1.15357	-0.532495	-0.621072
CG12499	-1.15054	0.490508	0.660036
CG12512	-0.83737	1.10724	-0.26987
CG12519	0.480885	0.668712	-1.1496
CG12531	0	0	0
CG12535	-0.0475519	1.02293	-0.975376
CG12541	-0.57735	-0.57735	1.1547
CG12547	-1.06335	0.141838	0.921508
CG12560	-0.586165	-0.56849	1.15466
CG12567	-1.15409	0.609578	0.544511
CG12576	-0.88266	1.08607	-0.203405
CG12581	0.489185	-1.15042	0.661235
CG12592	-0.541585	1.15398	-0.612391
CG12594	1.15248	-0.514306	-0.638177
CG12605	1.15401	-0.542331	-0.611676
CG12608	-0.911791	-0.157682	1.06947
CG12617	1.15262	-0.516366	-0.636258
CG12643	-0.741826	1.13725	-0.395422
CG1265	-0.534488	1.15366	-0.619177
CG12655	-0.57735	1.1547	-0.57735
CG12659	-1.08836	0.210095	0.878261
CG12674	1.15415	-0.546107	-0.60804
CG12689	1.14877	-0.473202	-0.675572
CG12692	1.15262	-0.516243	-0.636373
CG12693	1.15406	-0.543761	-0.6103
CG12698	1.15316	-0.524955	-0.628206
CG12699	1.1463	-0.452718	-0.693578
CG12702	0.541666	0.612314	-1.15398
CG1271	0.75	0.385345	-1.13535
CG12713	1.15397	-0.541321	-0.612645
CG12717	-0.923432	-0.138664	1.0621
CG12725	1.15037	-0.488608	-0.661757
CG12728	1.15206	-0.508423	-0.643635
CG12730	-1.0294	0.96775	0.0616478
CG12744	-0.478197	1.14932	-0.671119
CG12746	-1.09849	0.857439	0.241055
CG1275	-0.654261	1.15112	-0.496858
CG12766	0	0	0
CG12768	-0.817414	1.11502	-0.297605
CG12773	-1.14919	0.672184	0.477004
CG12795	0.945868	-1.04652	0.100651
CG12811	-1.13102	0.766992	0.364028
CG12814	-0.704308	-0.440287	1.14459
CG12818	1.15288	-0.632561	-0.520319
CG12822	-1.07191	0.907785	0.164125
CG12824	-0.57735	-0.57735	1.1547
CG12825	-0.57735	1.1547	-0.57735
CG12826	0	0	0
CG12836	-0.57735	1.1547	-0.57735
CG12848	1.15466	-0.569202	-0.58546
CG12851	1.15469	-0.574163	-0.580531
CG12853	1.14374	-0.434425	-0.709317
CG12857	1.15279	-0.518965	-0.633829
CG12860	1.1528	-0.519112	-0.633692
CG12861	1.15235	-0.512368	-0.63998
CG12863	-0.843863	-0.260654	1.10452
CG12868	0.292037	0.821471	-1.11351
CG12869	0	0	0
CG12877	1.11602	-0.814658	-0.301367
CG1288	1.15369	-0.535119	-0.618576
CG12880	1.15468	-0.571321	-0.583359
CG12883	-1.13566	0.74868	0.38698
CG12895	-1.02899	0.968245	0.0607407
CG12896	-0.366524	1.13155	-0.765023
CG12909	1.14485	-0.702748	-0.442105
CG12910	-0.57735	-0.57735	1.1547
CG12913	1.05329	-0.11685	-0.936442
CG12917	1.15469	-0.573622	-0.58107
CG12920	-0.608573	1.15413	-0.545554
CG12923	1.14968	-0.481662	-0.668015
CG12926	1.15014	-0.486281	-0.663859
CG12929	-0.144815	1.06451	-0.919697
CG12934	-0.716677	1.14242	-0.42574
CG12935	-0.618643	1.15369	-0.535048
CG12942	-0.487857	1.15029	-0.662436
CG12945	-0.718382	-0.423718	1.1421
CG12947	-0.710756	1.14349	-0.432734
CG12948	-0.304302	1.1168	-0.812499
CG12963	1.1525	-0.514505	-0.637992
CG12971	1.1547	-0.57735	-0.57735
CG12974	-0.447045	-0.698493	1.14554
CG12975	-1.15448	0.557664	0.596815
CG12984	1.15443	-0.555753	-0.598681
CG12990	-0.57735	-0.57735	1.1547
CG12991	1.15418	-0.547029	-0.60715
CG12992	1.15338	-0.528826	-0.624551
CG13000	0	0	0
CG13001	-0.603762	1.15429	-0.55053
CG13003	1.10217	-0.849279	-0.252888
CG13004	-1.13797	0.399347	0.738618
CG13005	-1.00699	0.992862	0.014127
CG13010	1.15175	-0.504418	-0.647331
CG13012	-0.608511	1.15413	-0.545618
CG13014	-1.08132	0.189869	0.891454
CG13016	-0.571739	-0.582944	1.15468
CG13018	0.72802	0.412193	-1.14021
CG13021	1.14895	-0.47478	-0.674168
CG13024	-0.57735	1.1547	-0.57735
CG13025	0.64779	0.503919	-1.15171
CG13032	1.15459	-0.563413	-0.591176
CG1307	1.15451	-0.559082	-0.595428
CG13074	1.15199	-0.507492	-0.644496
CG13077	-1.03376	0.0713312	0.962425
CG13078	-0.57735	-0.57735	1.1547
CG13085	-0.57735	-0.57735	1.1547
CG13086	-1.06187	0.923781	0.138086
CG13088	1.14786	-0.465229	-0.682629
CG1309	1.15421	-0.548099	-0.606116
CG13096	1.07966	-0.894448	-0.185209
CG13097	-0.600697	-0.553684	1.15438
CG13101	0	0	0
CG13102	-0.809046	-0.308978	1.11802
CG13108	0.80785	0.310592	-1.11844
CG13116	-0.806148	-0.312882	1.11903
CG13117	-1.1547	0.578096	0.576605
CG13123	1.1499	-0.483838	-0.66606
CG13124	-1.05069	0.110572	0.940118
CG13126	-1.12435	0.789942	0.334407
CG13127	1.15163	-0.648719	-0.502908
CG13138	-0.621568	-0.531974	1.15354
CG13144	-0.592393	1.15457	-0.562176
CG13148	1.15394	-0.540669	-0.61327
CG13151	-0.569443	1.15466	-0.585221
CG13154	0	0	0
CG13155	0.213616	0.875931	-1.08955
CG13159	-0.57735	-0.57735	1.1547
CG1316	1.1531	-0.523884	-0.629215
CG13160	-0.57735	-0.57735	1.1547
CG13168	1.15442	-0.55536	-0.599065
CG1317	0.658349	0.492368	-1.15072
CG13175	-0.57735	1.1547	-0.57735
CG13185	-1.00105	0.0021034	0.998947
CG13192	-1.03652	0.958959	0.0775642
CG13197	1.09377	-0.867437	-0.226331
CG13204	-0.514108	1.15247	-0.638362
CG13220	-0.844013	-0.260438	1.10445
CG13229	1.15365	-0.534147	-0.619501
CG13231	0	0	0
CG1324	1.15191	-0.506476	-0.645434
CG13244	1.15453	-0.559865	-0.594661
CG13247	0	0	0
CG13248	0.909226	0.161813	-1.07104
CG13252	0.640482	0.511827	-1.15231
CG13255	1.14085	-0.415996	-0.724853
CG13258	0	0	0
CG13282	-0.57735	1.1547	-0.57735
CG13293	1.15452	-0.559367	-0.595149
CG13295	-0.450142	-0.695814	1.14596
CG13300	0	0	0
CG13314	-0.57735	1.1547	-0.57735
CG13315	-0.743263	1.13692	-0.39366
CG13319	0.59901	-1.15443	0.555416
CG13321	-0.713069	-0.430009	1.14308
CG13337	1.15315	-0.524854	-0.628301
CG13339	1.15315	-0.524782	-0.628369
CG13344	1.15102	-0.495785	-0.65524
CG13358	-0.730263	1.13975	-0.409489
CG13359	1.15173	-0.504182	-0.647548
CG13360	1.0897	-0.214071	-0.875629
CG13362	0	0	0
CG13364	-0.811248	-0.305999	1.11725
CG13365	1.14705	-0.688457	-0.458592
CG13366	-0.601666	-0.552689	1.15435
CG13367	0.906529	-1.07266	0.166134
CG13369	-1.13927	0.406723	0.732551
CG13373	0.75835	0.374933	-1.13328
CG13375	1.15253	-0.51503	-0.637504
CG13377	-0.600417	1.15439	-0.553972
CG13384	-0.938363	1.05194	-0.113576
CG13390	-0.56318	-0.591405	1.15459
CG13392	-0.71553	1.14263	-0.4271
CG13397	-0.645943	1.15187	-0.505924
CG13398	-1.11017	0.280054	0.830116
CG13405	1.15402	-0.542561	-0.611454
CG13409	-1.03002	0.967002	0.0630155
CG13430	-0.57735	1.1547	-0.57735
CG13436	1.15387	-0.539009	-0.614861
CG13437	-1.12921	0.355629	0.773577
CG1344	1.13278	-0.372483	-0.760301
CG13442	1.15463	-0.566415	-0.588217
CG13449	1.15222	-0.510625	-0.641597
CG13457	1.13172	-0.367326	-0.764389
CG13458	1.14405	-0.707526	-0.436525
CG13482	-0.57735	-0.57735	1.1547
CG13484	1.14375	-0.434502	-0.709251
CG13488	1.15442	-0.555367	-0.599058
CG13506	-0.57735	-0.57735	1.1547
CG13510	-0.57735	1.1547	-0.57735
CG13511	-0.57735	1.1547	-0.57735
CG13516	1.15383	-0.615782	-0.538045
CG13531	0.696951	0.448829	-1.14578
CG1354	-1.1527	0.517475	0.635223
CG13540	1.15432	-0.551609	-0.602715
CG13544	1.15196	-0.507168	-0.644795
CG13551	-1.0266	0.055512	0.971088
CG13559	-1.099	0.242656	0.856342
CG13562	-0.57735	1.1547	-0.57735
CG13563	0.295388	0.819032	-1.11442
CG13578	0	0	0
CG1358	-0.705215	1.14444	-0.439228
CG13585	-0.952375	1.04164	-0.089265
CG13599	0.943501	0.104752	-1.04825
CG1360	0.959306	-1.03625	0.0769433
CG13601	1.14868	-0.472387	-0.676296
CG13603	-0.57967	1.1547	-0.575027
CG13604	0.381882	-1.13467	0.752788
CG13605	1.02194	-0.0454235	-0.976514
CG13607	-0.57735	1.1547	-0.57735
CG13609	0.836894	0.270542	-1.10744
CG13623	1.12964	-0.357606	-0.772033
CG13625	-0.516944	-0.635718	1.15266
CG13630	0.412674	-1.14029	0.72762
CG13631	-1.1541	0.54477	0.609329
CG13654	-1.14019	0.728121	0.412071
CG13659	0	0	0
CG13663	1.10508	-0.262546	-0.842535
CG13667	1.14183	-0.422056	-0.719779
CG13671	-0.571791	1.15468	-0.582891
CG13676	-0.57735	1.1547	-0.57735
CG13689	-1.05062	0.940219	0.1104
CG13690	-1.14026	0.412458	0.727799
CG13692	-1.1519	0.645533	0.506369
[truncated: 8,708 more rows]

## Sheet: PM7
gene	Unwouned_AverageExpression	Wounded_AverageExpression	Wasp inf. 24h_AverageExpression
[truncated: 10,392 more rows]

[truncated: 8 more sheets: PM8, PM9, PM10, PM11, CC1, CC2, LM1, LM2]
