# Supplementary material for: A single-cell survey of Drosophila blood
Source: eLife. 2020 May 12;9:e54818. doi: 10.7554/eLife.54818 (PMC7237219; doi:10.7554/eLife.54818)
Supplement: Supplementary file 4. [file elife-54818-supp4.xlsx]

## Sheet: PPO1low
gene	Unwouned_AverageExpression	Wounded_AverageExpression	Wasp inf. 24h_AverageExpression
128up	-0.966415	-0.0640873	1.0305
14-3-3epsilon	-0.85936	-0.238246	1.09761
14-3-3zeta	-0.536574	-0.617188	1.15376
140up	1.03057	-0.0642315	-0.966336
18SrRNA-Psi:CR41602	1.14069	-0.725649	-0.415041
18SrRNA-Psi:CR45861	0.948419	0.0962079	-1.04463
18SrRNA:CR41548	0.93255	0.123438	-1.05599
18SrRNA:CR45838	0.934205	0.120644	-1.05485
18SrRNA:CR45841	0.936548	0.11667	-1.05322
26-29-p	0.504803	0.646976	-1.15178
28SrRNA-Psi:CR40596	0.86251	0.233619	-1.09613
28SrRNA-Psi:CR40741	1.10368	-0.257885	-0.845799
28SrRNA-Psi:CR41609	1.13821	-0.400693	-0.737515
28SrRNA-Psi:CR45848	1.09287	-0.223596	-0.869275
28SrRNA-Psi:CR45851	0.886114	0.198115	-1.08423
28SrRNA-Psi:CR45853	1.12086	-0.320088	-0.800767
28SrRNA-Psi:CR45855	0.861173	-1.09676	0.235586
28SrRNA-Psi:CR45859	0.890851	-1.08166	0.190805
28SrRNA-Psi:CR45860	1.11351	-0.292038	-0.82147
28SrRNA-Psi:CR45862	1.14099	-0.416876	-0.724118
28SrRNA:CR45837	0.965021	0.0666262	-1.03165
28SrRNA:CR45844	0.863076	0.232785	-1.09586
312	-0.800803	1.12084	-0.32004
4E-T	0.403415	0.735278	-1.13869
5.8SrRNA-Psi:CR45863	-0.723455	-0.417669	1.14112
a	0.704151	0.44047	-1.14462
A16	-1.1547	0.580171	0.574525
a6	0.23955	0.858469	-1.09802
AANAT1	0.57278	0.581909	-1.15469
Aasdh	-0.307635	1.11767	-0.81004
Aatf	-0.903472	-0.171002	1.07447
aay	0.815483	0.300242	-1.11572
ABCA	-0.571151	1.15468	-0.583527
ABCB7	0.166022	0.906599	-1.07262
ABCD	-0.621365	1.15355	-0.532188
Abi	0.153032	0.914663	-1.06769
Abl	0.613195	0.540748	-1.15394
abo	-0.440068	1.14456	-0.704496
Abp1	-0.653332	1.15121	-0.497876
abs	-1.13215	0.762744	0.369405
Ac76E	-0.487077	-0.663141	1.15022
Ac78C	-0.79717	-0.324872	1.12204
Acbp1	-0.991824	-0.0161555	1.00798
Acbp2	1.13503	-0.383704	-0.751323
ACC	-0.561715	1.15456	-0.592845
AcCoAS	-1.02504	0.0521286	0.972916
Acer	0.581277	0.573414	-1.15469
Acf	-0.0713323	1.03376	-0.962424
achi	-0.923656	-0.138292	1.06195
Ack	0.452114	0.694103	-1.14622
Ack-like	-0.847295	-0.255741	1.10304
Acn	-0.662864	-0.487383	1.15025
Acox57D-p	0.105247	0.943214	-1.04846
Acph-1	-0.0839624	1.03933	-0.955372
Acsl	0.548371	-1.15422	0.605852
Act42A	-0.823335	-0.289467	1.1128
Act57B	0.996616	0.00673356	-1.00335
Act5C	-0.19052	1.08155	-0.891035
Actn	1.0212	-0.043837	-0.977361
Acyp2	-0.867443	-0.226322	1.09376
Ada	1.14811	-0.467364	-0.680746
Ada2a	-0.567094	-0.587546	1.15464
Ada2b	-1.13552	0.749259	0.386264
Ada3	0.4115	0.728595	-1.1401
Adar	-1.02317	0.975095	0.0480766
Adck1	-0.366989	1.13165	-0.764656
ADD1	-0.672865	-0.476241	1.14911
AdenoK	0.581426	0.573265	-1.15469
Adf1	1.06537	-0.918349	-0.147023
Adgf-A	-0.767336	-0.363591	1.13093
Adi1	-0.283804	-0.827423	1.11123
AdipoR	1.15106	-0.654844	-0.496219
Adk2	-0.576499	-0.578201	1.1547
Adk3	0.790814	0.333262	-1.12408
adp	1.14188	-0.719525	-0.422358
AdSL	0.597131	0.557341	-1.15447
AdSS	0.211639	0.87724	-1.08888
Aef1	-0.31573	-0.804027	1.11976
aft	0.525968	0.627251	-1.15322
Afti	-0.914098	1.06805	-0.153948
AGBE	-0.549963	-0.604311	1.15427
AgmNAT	-1.15188	0.645845	0.506031
ago	-0.0713008	1.03374	-0.962441
AGO1	-0.968638	-0.0600205	1.02866
AGO2	-0.0530978	1.02549	-0.972393
AGO3	-0.928942	1.05844	-0.1295
Agpat1	0.354448	0.774498	-1.12895
Agpat3	-1.08035	0.187133	0.893214
agt	0.579006	0.575693	-1.1547
Ahcy	0.581328	0.573364	-1.15469
AhcyL1	1.15098	-0.655673	-0.49531
AIF	-0.328483	1.12293	-0.794442
AIMP1	-1.06658	0.150142	0.916439
AIMP2	-1.14242	0.425785	0.71664
AIMP3	-1.15454	0.593795	0.560748
Ak6	-1.13019	0.360134	0.770053
Akap200	-0.812613	-0.304148	1.11676
akirin	-0.398945	-0.738947	1.13789
Akt1	1.09053	-0.873991	-0.216537
Aladin	-0.0659208	1.03133	-0.965409
AlaRS	0.521922	0.631058	-1.15298
AlaRS-m	0.145618	0.919208	-1.06483
Alas	-0.677657	1.14851	-0.470854
alc	-0.450201	1.14596	-0.695763
Ald1	0.709192	0.434572	-1.14376
Aldh	-0.921306	1.06348	-0.142171
Aldh-III	0.217171	0.873569	-1.09074
Aldh7A1	-1.04887	0.106227	0.942646
Alg-2	-1.02639	0.0550628	0.971331
Alg1	1.15259	-0.515856	-0.636734
Alg10	-0.908854	-0.162411	1.07126
Alg11	-0.977123	-0.0442819	1.02141
Alg14	-0.986397	-0.0266725	1.01307
Alg2	-0.235938	-0.860933	1.09687
Alg3	0.504011	0.647705	-1.15172
Alg9	-0.440575	-0.704061	1.14464
Alh	-0.550577	-0.603716	1.15429
alien	-0.910931	-0.15907	1.07
ALiX	-1.0749	0.902752	0.172145
AlkB	0.245141	0.854634	-1.09978
Alp12	-0.658633	1.15069	-0.492055
alph	-0.72532	-0.415436	1.14076
alpha-Cat	0.1764	-1.07646	0.900062
alpha-Est1	0.550532	0.603759	-1.15429
alpha-Est3	-0.385073	-0.750219	1.13529
alpha-Est5	1.1547	-0.57735	-0.57735
alpha-Est7	0.534712	0.618964	-1.15368
alpha-Est8	0.0210638	-1.01037	0.989302
alpha-Est9	1.15369	-0.618668	-0.535022
alpha-Man-Ia	0.221052	0.870979	-1.09203
alpha-Man-Ib	1.1426	-0.426934	-0.71567
alpha-Man-IIa	-0.22984	1.09491	-0.86507
alpha-Man-IIb	-0.57735	-0.57735	1.1547
alpha-PheRS	1.12672	-0.782152	-0.344572
alpha-Spec	0.551485	0.602835	-1.15432
alpha4GT1	1.10555	-0.264123	-0.841426
alphaCOP	0.759597	0.373368	-1.13296
alphaSnap	1.15383	-0.538115	-0.615716
alphaTub84B	-0.769945	-0.360271	1.13022
alphaTub84D	1.116	-0.301259	-0.814737
alphaTub85E	-0.570887	1.15468	-0.58379
Alr	0.685461	0.46201	-1.14747
Als2	0.798618	0.322949	-1.12157
alt	-0.341765	-0.784312	1.12608
Ama	0.60139	0.552972	-1.15436
Amacr	1.04156	-0.0890902	-0.952474
amn	-0.507371	1.15198	-0.644608
AMPdeam	0.04417	-1.02135	0.977183
Amph	-1.12377	0.791788	0.331982
AMPKalpha	0.572896	0.581793	-1.15469
Amun	1.0421	-0.0903249	-0.951773
amx	-0.757339	1.13354	-0.3762
ana1	-1.08254	0.889241	0.193297
ana2	1.1547	-0.576326	-0.578374
ana3	-0.474976	1.14897	-0.673994
Ance	-0.658277	-0.492447	1.15072
Ance-2	-0.57735	-0.57735	1.1547
Ance-3	1.1321	-0.369159	-0.762939
Ance-4	-0.139581	-0.922877	1.06246
Ance-5	0.556312	0.598136	-1.15445
anchor	-0.0586448	-0.969387	1.02803
angel	0.585763	-1.15466	0.568897
Ank	0.985173	0.0290218	-1.01419
Ankle2	0.951668	0.0905107	-1.04218
anne	-1.13994	0.410579	0.729359
anox	0.774953	-1.12882	0.353863
Ant2	1.05128	-0.939286	-0.111999
antr	0.433327	-1.14358	0.710251
AnxB10	0.221539	0.870653	-1.09219
AnxB11	-0.583101	-0.571581	1.15468
AnxB9	-0.842797	-0.262173	1.10497
aop	0.530048	-1.15344	0.623394
Aos1	-0.690571	-0.456171	1.14674
AOX1	1.07214	-0.164748	-0.907395
AOX3	0.524296	0.628826	-1.15312
AP-1-2beta	-0.225001	1.09333	-0.868331
AP-1gamma	-0.0445628	-0.976974	1.02154
AP-1mu	-0.587101	1.15465	-0.567545
AP-1sigma	0.497128	-1.15114	0.654014
AP-2alpha	-0.781857	1.12681	-0.344956
AP-2mu	0.063663	0.966647	-1.03031
AP-2sigma	-1.15455	0.593326	0.561226
Apc	0.161655	0.909324	-1.07098
APC10	-0.290406	-0.822654	1.11306
Apc2	0.877369	0.211444	-1.08881
APC4	-1.03037	0.0637952	0.966575
ApepP	0.40771	0.731735	-1.13945
Apf	-0.861318	-0.235373	1.09669
aph-1	-0.884538	-0.200533	1.08507
aPKC	-0.224019	1.09301	-0.868991
Apl	0.558308	0.596186	-1.15449
Apoltp	0.921457	0.141922	-1.06338
app	0.394808	-1.13714	0.742327
APP-BP1	1.13857	-0.40272	-0.73585
Aprt	0.0862152	-1.04032	0.954101
Aps	-0.254982	-0.847824	1.10281
aqz	-0.115139	-0.937447	1.05259
aralar1	0.453689	0.692734	-1.14642
Arc1	-0.991283	-0.0172119	1.00849
Arc2	-0.6861	-0.461282	1.14738
Arc42	1.14336	-0.431879	-0.711482
Archease	1.14376	-0.709187	-0.434577
Arf102F	-0.673632	-0.475382	1.14901
Arf51F	-0.728818	-0.411232	1.14005
Arf79F	-0.883517	-0.202096	1.08561
ArfGAP1	-0.671429	1.14928	-0.47785
ArfGAP3	-0.753776	1.13443	-0.380651
Arfip	-0.916846	-0.149479	1.06632
Arfrp1	-0.91055	-0.159684	1.07023
arg	-0.0229265	1.01127	-0.98834
ArgRS	-0.144751	1.06449	-0.919736
ArgRS-m	1.01376	-0.0281185	-0.985644
ari-1	-0.738862	-0.399049	1.13791
ari-2	-0.57735	1.1547	-0.57735
Arl1	-0.895981	-0.182813	1.07879
Arl2	-1.14295	0.429192	0.713761
Arl4	-1.07261	0.165996	0.906615
Arl5	0.213912	-1.08965	0.875735
Arl6IP1	0.528097	-1.15334	0.62524
Arl8	0.20749	0.879978	-1.08747
arm	0.586164	0.568492	-1.15466
armi	1.15465	-0.567603	-0.587043
Arp1	0.863422	0.232275	-1.0957
Arp10	0.445928	0.699457	-1.14539
Arp2	0.816131	0.299358	-1.11549
Arp3	-1.07728	0.178647	0.898636
Arp5	-0.707549	1.14405	-0.436498
Arp6	-0.461021	-0.686329	1.14735
Arp8	-0.178053	-0.899013	1.07707
Arpc1	-1.13982	0.729957	0.409858
Arpc2	-0.756591	-0.377137	1.13373
Arpc3A	-0.953381	-0.0874897	1.04087
Arpc3B	-0.894153	-0.18567	1.07982
Arpc4	-1.02994	0.0628428	0.967097
Arpc5	-0.852566	-0.248141	1.10071
arr	-0.235392	1.0967	-0.861305
Ars2	-0.797003	-0.325093	1.1221
Art1	0.758317	0.374975	-1.13329
Art3	0.9192	0.145631	-1.06483
Art4	0.430398	0.712739	-1.14314
Art7	-1.04018	0.954273	0.0859113
Art8	-1.01588	0.0325628	0.983321
Arts	0.390126	0.746133	-1.13626
aru	-0.148059	-0.917716	1.06577
Arv1	0.392812	0.743952	-1.13676
arx	0.659727	0.49085	-1.15058
Asap	0.546229	0.607922	-1.15415
Asator	-0.689925	1.14684	-0.456912
asf1	1.09474	-0.865416	-0.229328
ash1	0.518248	0.6345	-1.15275
ash2	-1.14815	0.680409	0.467745
Ask1	1.13268	-0.371978	-0.760702
asl	1.11377	-0.82077	-0.293001
AsnRS	0.710499	0.433035	-1.14353
AsnRS-m	0.750794	-1.13515	0.384361
AsnS	0.163225	0.908346	-1.07157
asp	0.621419	0.532131	-1.15355
AspRS	0.676524	0.472131	-1.14865
AspRS-m	-0.24084	1.09843	-0.857587
asrij	-0.763674	-0.368231	1.1319
asRNA:CR31144	-0.610478	-0.543576	1.15405
asRNA:CR31514	-0.57735	1.1547	-0.57735
asRNA:CR42254	-0.0293085	-0.985024	1.01433
asRNA:CR42871	-0.31425	1.11938	-0.80513
asRNA:CR43257	-0.820054	-0.293986	1.11404
asRNA:CR43465	-1.00105	0.998949	0.00209815
asRNA:CR43468	-1.10888	0.833336	0.275549
asRNA:CR43730	0.830767	0.279145	-1.10991
asRNA:CR43809	-0.300948	1.11591	-0.814965
asRNA:CR43812	0.96936	0.0586939	-1.02805
asRNA:CR43833	0.300477	0.815311	-1.11579
asRNA:CR43868	0.763727	0.368164	-1.13189
asRNA:CR43875	1.10872	-0.27499	-0.833734
asRNA:CR43906	-1.12752	0.348072	0.779449
asRNA:CR43916	0.947635	0.0975756	-1.04521
asRNA:CR43957	1.05951	-0.132154	-0.927352
asRNA:CR43964	-0.155906	1.0688	-0.91289
asRNA:CR44029	-1.0984	0.240742	0.857654
asRNA:CR44030	-0.357746	-0.771923	1.12967
asRNA:CR44031	0.470503	0.677968	-1.14847
asRNA:CR44047	-0.145302	1.0647	-0.9194
asRNA:CR44095	0.998187	0.00361697	-1.0018
asRNA:CR44168	-0.646442	1.15183	-0.505383
asRNA:CR44179	1.11281	-0.289484	-0.823323
asRNA:CR44266	0.881254	0.20555	-1.0868
asRNA:CR44291	-0.377273	-0.756482	1.13375
asRNA:CR44386	-1.14934	0.478409	0.670929
asRNA:CR44429	-0.952079	-0.0897865	1.04187
asRNA:CR44431	0.605575	0.548658	-1.15423
asRNA:CR44872	0.775059	0.353728	-1.12879
asRNA:CR44962	-0.456181	1.14674	-0.690563
asRNA:CR44969	0.986184	0.0270815	-1.01327
asRNA:CR44976	-0.258565	-0.845324	1.10389
asRNA:CR44987	0.897216	0.180877	-1.07809
asRNA:CR45028	0.344001	0.782593	-1.12659
asRNA:CR45044	0.366737	0.764855	-1.13159
asRNA:CR45053	-0.666053	1.1499	-0.483846
asRNA:CR45139	0.763706	0.368191	-1.1319
asRNA:CR45140	-0.656759	-0.494117	1.15088
asRNA:CR45141	0.192876	0.889513	-1.08239
asRNA:CR45142	-0.206199	1.08703	-0.880827
asRNA:CR45160	0.275283	0.833525	-1.10881
asRNA:CR45164	-0.427468	1.14269	-0.715219
asRNA:CR45175	-1.09908	0.85617	0.242906
asRNA:CR45190	0.519789	0.633058	-1.15285
asRNA:CR45195	0.938088	0.114045	-1.05213
asRNA:CR45214	1.10904	-0.276083	-0.832955
asRNA:CR45264	0.185287	0.894398	-1.07969
asRNA:CR45275	-0.683084	1.1478	-0.464713
asRNA:CR45350	0.752818	0.381845	-1.13466
asRNA:CR45367	-0.410139	1.13986	-0.729725
asRNA:CR45396	-0.590193	-0.564412	1.1546
asRNA:CR45604	0.140393	0.922385	-1.06278
asRNA:CR45778	-0.0934711	1.04345	-0.949983
asRNA:CR45798	-0.385219	1.13532	-0.750102
asRNA:CR45806	0.553526	0.600851	-1.15438
asRNA:CR45818	0.692957	0.453433	-1.14639
asRNA:CR45822	-0.57735	-0.57735	1.1547
asRNA:CR45865	-1.14751	0.685201	0.462306
asRNA:CR45874	-0.337468	-0.787606	1.12507
asRNA:CR45907	-0.772262	-0.357313	1.12957
asRNA:CR45925	-0.627882	1.15318	-0.525299
asRNA:CR45926	0.702131	0.442823	-1.14495
asRNA:CR45928	1.14917	-0.476811	-0.672357
asRNA:CR45999	0.302697	0.81368	-1.11638
asRNA:CR46067	0.685752	0.461678	-1.14743
asRNA:CR46089	1.02559	-0.0533062	-0.972281
asRNA:CR46093	-0.696985	-0.44879	1.14577
asRNA:CR46104	0.713872	0.429061	-1.14293
asRNA:CR46133	0.993043	0.0137711	-1.00681
asRNA:CR46135	0.161036	0.90971	-1.07075
ast	0.315023	0.804554	-1.11958
asun	-1.09829	0.857885	0.240404
Asx	-0.972734	1.0252	-0.0524661
Atac2	-0.79194	1.12372	-0.331782
Atac3	0.791952	-1.12372	0.331766
ATbp	0.0043187	0.997834	-1.00215
Ate1	1.13326	-0.374818	-0.758442
Atet	1.12394	-0.332704	-0.79124
Atf-2	1.13459	-0.381474	-0.753116
Atf3	-0.911038	-0.158897	1.06994
Atf6	-1.14913	0.476491	0.672642
Atg1	-0.67813	1.14845	-0.47032
Atg101	1.15129	-0.49888	-0.652413
Atg12	-0.714856	1.14275	-0.427898
Atg13	0.998263	0.00346574	-1.00173
Atg14	0.847727	0.25512	-1.10285
Atg16	-1.10952	0.831755	0.277763
Atg17	-0.197654	-0.886414	1.08407
Atg18a	-0.369678	1.13221	-0.762528
Atg18b	0.535794	0.617933	-1.15373
Atg2	0.835687	0.272244	-1.10793
Atg3	-1.15453	0.594334	0.560199
Atg4a	0.658913	0.491747	-1.15066
Atg4b	0.715436	0.42721	-1.14265
Atg5	1.14917	-0.476837	-0.672334
Atg6	-0.176923	1.07665	-0.899731
Atg7	0.771151	-1.12988	0.358733
Atg8a	-0.715311	-0.427358	1.14267
Atg9	1.11698	-0.304998	-0.811986
atilla	-0.872178	-0.219257	1.09144
atl	-0.525372	1.15318	-0.627813
atms	0.619321	0.534336	-1.15366
Atox1	0.72351	0.417604	-1.14111
ATP6AP2	0.689214	0.457725	-1.14694
ATP7	1.07763	-0.179597	-0.898032
ATP8A	1.02184	-0.976626	-0.0452147
ATP8B	0.622684	0.530797	-1.15348
Atpalpha	0.683598	0.464129	-1.14773
ATPCL	-0.648308	1.15166	-0.503356
ATPsynB	0.560381	0.594155	-1.15454
ATPsynbeta	0.517896	0.634829	-1.15273
ATPsynC	-0.568726	-0.585932	1.15466
ATPsynCF6	0.458249	0.688757	-1.14701
ATPsynD	0.323688	0.798062	-1.12175
ATPsyndelta	0.402988	0.73563	-1.13862
ATPsynE	-0.661405	-0.488997	1.1504
ATPsynF	-0.762945	-0.369151	1.1321
ATPsynG	0.430267	0.712849	-1.14312
ATPsyngamma	0.443794	0.701296	-1.14509
ATPsynO	0.304897	0.812061	-1.11696
AttB	-0.614509	-0.539377	1.15389
Atu	-0.322295	1.1214	-0.79911
Atx2	1.06743	-0.15233	-0.915095
Atxn7	0.893015	0.187443	-1.08046
aurA	0.754225	0.380092	-1.13432
aurB	-0.734731	-0.40408	1.13881
aux	0.276512	0.832649	-1.10916
ave	-1.11968	0.804255	0.315425
Aven	-1.135	0.751446	0.383551
awd	-0.844796	-0.25932	1.10412
axed	0.791511	0.332347	-1.12386
Axn	-0.624564	1.15338	-0.528813
Axs	0.512157	-1.15233	0.640175
Axud1	-1.13772	0.398009	0.739713
B4	-1.13799	0.399479	0.73851
B52	-0.456085	-0.690647	1.14673
babo	-1.05131	0.112054	0.939253
Bacc	-0.411337	-0.72873	1.14007
baf	-0.952122	-0.0897108	1.04183
bai	-0.999679	-0.000642367	1.00032
Baldspot	-0.771588	-0.358175	1.12976
ball	0.682399	-1.14789	0.46549
bam	-0.992077	1.00774	-0.0156614
Bap111	0.591392	0.563194	-1.15459
Bap170	0.521959	0.631023	-1.15298
Bap55	-0.476498	-0.672636	1.14913
Bap60	-0.916438	-0.150144	1.06658
barc	-0.663401	-0.486788	1.15019
barr	1.12193	-0.797528	-0.324397
baz	0.98565	0.0281067	-1.01376
bbc	-0.684524	-0.463076	1.1476
bbg	-1.14061	0.726056	0.414553
bbx	0.142218	0.921278	-1.0635
bc10	0.828417	-1.11084	0.282422
BCAS2	-0.61929	-0.534369	1.15366
bchs	-1.14275	0.427903	0.714851
BCL7-like	-0.583392	1.15468	-0.571287
bcn92	-0.658407	-0.492304	1.15071
Bdbt	-0.381795	1.13465	-0.752858
bdg	-0.566043	-0.588584	1.15463
Bdp1	1.15218	-0.510061	-0.64212
be	0.491381	-1.15063	0.659246
BEAF-32	-0.4819	-0.667801	1.1497
beag	0.927055	-1.0597	0.132649
beg	-0.0220048	-0.988816	1.01082
bel	-0.782584	-0.344012	1.1266
Bem46	0.836322	0.271349	-1.10767
ben	0.697722	0.447937	-1.14566
Best1	-0.334593	-0.789801	1.12439
Bet1	-1.15146	0.650549	0.500915
Bet3	-1.02888	0.96837	0.0605125
Bet5	-0.964113	-0.0682741	1.03239
beta-Man	-1.13665	0.744438	0.392215
beta-PheRS	0.839408	0.266988	-1.1064
beta-Spec	0.975388	0.047529	-1.02292
beta'COP	0.584859	0.569809	-1.15467
beta3GalTII	-1.15233	0.640175	0.512157
beta4GalNAcTA	1.06117	-0.136334	-0.924838
beta4GalNAcTB	-0.950389	-0.0927577	1.04315
beta4GalT7	0.26512	0.840725	-1.10584
betaCOP	-0.0420431	1.02036	-0.978315
betaggt-I	-1.08886	0.211587	0.877275
betaggt-II	0.590978	0.563615	-1.15459
betaGlu	-0.00684689	1.00341	-0.996559
betaTub56D	-0.395208	-0.742001	1.13721
betaTub60D	-1.05894	0.928202	0.130735
betaTub97EF	1.12629	-0.783593	-0.342702
Bgb	0.96777	0.0616107	-1.02938
bgm	-0.57735	-0.57735	1.1547
BHD	1.13566	-0.748701	-0.386955
BI-1	1.08612	-0.203553	-0.882563
bic	-0.865196	-0.229653	1.09485
BicD	-0.874761	-0.215378	1.09014
bif	-0.720208	-0.421545	1.14175
bigmax	-0.990025	-0.0196603	1.00969
Bin1	-0.849344	-0.252795	1.10214
bin3	-0.30062	-0.815206	1.11583
bip2	-0.86359	-0.232027	1.09562
Bka	-0.355866	-0.773392	1.12926
Blm	1.06907	-0.15662	-0.912448
Blos1	-0.549102	-0.605145	1.15425
Blos2	0.552455	-1.15435	0.601892
Blos3	-0.95893	1.03655	-0.0776166
Blos4	-0.994145	-0.011608	1.00575
blow	0.760695	0.371987	-1.13268
blp	-0.440369	-0.704238	1.14461
blw	-0.567361	-0.587282	1.15464
Bmcp	-1.03548	0.960275	0.0752042
bmm	-0.843372	-0.261353	1.10473
bnl	0.90021	0.176166	-1.07638
boca	-0.600055	-0.554344	1.1544
bocks	0.826408	0.285214	-1.11162
BOD1	0.969393	0.0586333	-1.02803
bol	1.13859	-0.73574	-0.402853
bon	0.277788	0.831737	-1.10953
bonsai	-1.15403	0.542873	0.611154
bor	-0.281448	-0.829117	1.11056
BORCS5	1.15296	-0.521596	-0.631364
BORCS6	-1.12198	0.797366	0.324612
borr	-0.565768	1.15462	-0.588856
botv	-0.0189128	1.00932	-0.990409
bowl	1.1547	-0.57735	-0.57735
br	0.532219	0.621335	-1.15355
Br140	0.768857	0.361658	-1.13051
brat	-0.935008	-0.119284	1.05429
Brd8	0.99247	-1.00736	0.0148928
Bre1	-0.148595	1.06598	-0.917388
Brf	0.635522	0.517154	-1.15268
brk	-0.738362	-0.39966	1.13802
brm	0.616858	0.53692	-1.15378
Brms1	-1.05166	0.938751	0.112913
brn	1.11058	-0.829084	-0.281493
bru2	1.13327	-0.374852	-0.758414
bru3	0.586958	0.567689	-1.15465
Bruce	0.921924	0.141153	-1.06308
brun	0.976024	0.0463408	-1.02236
BRWD3	-1.14369	0.434081	0.709609
brwl	0.756447	0.377316	-1.13376
bs	-1.15362	0.620125	0.533492
bsf	-0.746565	1.13616	-0.389595
Bsg	-0.768203	1.13069	-0.362489
Bsg25D	-0.785219	1.1258	-0.340585
bsk	1.09572	-0.863378	-0.232339
bt	0.822731	0.290301	-1.11303
BTBD9	-0.496114	1.15105	-0.654939
BtbVII	-1.07377	0.169103	0.904667
BthD	-1.06926	0.157134	0.91213
Btk29A	-0.348648	1.12765	-0.779004
btsz	-0.871187	-0.220741	1.09193
btz	-0.836131	1.10775	-0.271618
Bub1	0.998129	0.00373132	-1.00186
Bub3	-1.15414	0.545819	0.608318
BubR1	-0.956871	1.03817	-0.0812945
bug	-1.03901	0.0832168	0.955791
Bug22	-0.497807	-0.653394	1.1512
BuGZ	0.993576	0.0127268	-1.0063
bun	-0.52228	-0.630722	1.153
bur	-0.937419	-0.115186	1.05261
bves	-0.262202	-0.842777	1.10498
Bx42	-1.11498	0.817509	0.297474
by	0.72392	0.417113	-1.14103
bys	1.13168	-0.367164	-0.764517
c(3)G	-1.00146	0.00293001	0.998532
c11.1	1.05801	-0.128433	-0.929579
c12.1	-1.08201	0.191818	0.890196
c12.2	-1.00703	0.0142082	0.99282
C1GalTA	-0.918166	1.06549	-0.147323
C3G	-1.15431	0.60306	0.551253
ca	0.595433	0.559077	-1.15451
CaBP1	-0.853262	-0.247133	1.1004
cact	1.15122	-0.653222	-0.497995
cactin	1.15435	-0.601705	-0.552648
Cad86C	-0.62837	-0.524781	1.15315
Cad87A	1.12895	-0.354459	-0.77449
Caf1-105	-0.171878	-0.90292	1.0748
Caf1-180	-0.805607	-0.31361	1.11922
Caf1-55	0.289829	0.823073	-1.1129
cag	-0.182555	-0.896146	1.0787
CAH2	0.76372	0.368172	-1.13189
CAH3	0.66734	0.482414	-1.14975
cal1	1.00069	-0.999312	-0.00137363
CalpA	-1.06468	0.919439	0.145238
CalpB	0.669811	0.479659	-1.14947
CalpC	1.1316	-0.764833	-0.366765
Calr	0.432933	0.710586	-1.14352
Cals	-1.01016	0.989519	0.0206419
calypso	-1.09981	0.854569	0.245236
Cam	-0.338242	-0.787014	1.12526
CaMKI	-1.07019	0.15958	0.910614
CaMKII	-0.778653	-0.3491	1.12775
Camp	1.11834	-0.31019	-0.808148
Camta	-1.10507	0.262495	0.842571
CanA-14F	0.728932	0.411094	-1.14003
CanB2	0.610023	0.544049	-1.15407
Cand1	-0.843758	1.10456	-0.260803
CAP	-0.612439	-0.541536	1.15397
Cap-D2	-0.475378	1.14901	-0.673636
Cap-D3	1.11464	-0.296209	-0.818433
Cap-G	0.0113245	0.99429	-1.00561
Cap-H2	0.55448	0.599923	-1.1544
Caper	0.712568	-1.14317	0.430599
Capr	1.14548	-0.446628	-0.698853
caps	-1.01664	0.982488	0.0341498
capt	-1.1362	0.389814	0.746387
capu	-0.785163	-0.340658	1.12582
car	0.81153	0.305616	-1.11715
CASK	1.13331	-0.375046	-0.75826
casp	1.15223	-0.510761	-0.641471
cass	0.57442	0.580276	-1.1547
Cat	0.821701	0.291721	-1.11342
cathD	0.697335	0.448385	-1.14572
Catsup	-0.346814	1.12724	-0.780422
cav	-1.07648	0.176442	0.900036
caz	0.1493	0.916956	-1.06626
cbc	1.13223	-0.369784	-0.762444
Cbl	0.0509093	0.973573	-1.02448
CBP	0.95389	0.0865887	-1.04048
Cbp20	-1.05959	0.132355	0.927232
Cbp80	1.13276	-0.372373	-0.760388
cbs	-0.213531	1.08952	-0.875988
Cbs	0.552619	0.601733	-1.15435
cbt	-1.0456	0.947111	0.0984889
Cby	0.885322	0.199331	-1.08465
CCDC53	-0.292365	1.1136	-0.821233
Ccdc56	-0.611964	-0.542031	1.15399
Ccdc58	-0.822704	-0.290338	1.11304
Cchl	-0.996792	-0.0063847	1.00318
Ccm3	-0.702256	-0.442678	1.14493
Ccs	0.815748	0.29988	-1.11563
CCT1	0.704035	0.440605	-1.14464
CCT2	-0.924014	-0.1377	1.06171
CCT3	0.630756	0.522244	-1.153
CCT4	0.951298	0.0911611	-1.04246
CCT5	0.554857	0.599555	-1.15441
CCT6	0.64899	0.502613	-1.1516
CCT7	0.643743	0.508307	-1.15205
CCT8	0.928152	0.130819	-1.05897
Ccz1	-0.231686	1.09551	-0.863821
CD98hc	0.349295	-1.1278	0.778502
CDase	0.505503	0.646331	-1.15183
cdc14	-1.11571	0.300201	0.815513
Cdc16	-0.85477	1.09971	-0.244943
Cdc23	0.0406653	0.979047	-1.01971
Cdc27	0.909698	0.161055	-1.07075
Cdc2rk	0.461275	0.686107	-1.14738
Cdc37	-0.907818	-0.164071	1.07189
Cdc42	0.420324	0.721232	-1.14156
CDC45L	-0.594191	1.15454	-0.560344
Cdc5	0.57706	0.57764	-1.1547
CDC50	0.890461	0.191408	-1.08187
Cdc6	0.274435	-1.10856	0.834129
Cdc7	0.0616516	0.967748	-1.0294
Cdep	0.366065	0.765386	-1.13145
CdGAPr	-0.701754	1.14502	-0.443261
cdi	0.589923	0.564686	-1.15461
Cdk1	-1.04636	0.100285	0.946079
Cdk12	-0.886428	-0.197633	1.08406
Cdk2	-0.595321	1.15451	-0.559191
CDK2AP1	-0.707134	-0.436984	1.14412
Cdk4	-1.0212	0.97736	0.0438384
Cdk5	-0.529169	-0.624227	1.1534
Cdk7	0.704028	0.440613	-1.14464
Cdk9	0.512603	-1.15236	0.639761
cdm	0.552034	0.602302	-1.15434
Cds	0.549953	0.604321	-1.15427
CecA1	-0.57735	-0.57735	1.1547
CecA2	-0.60755	-0.546615	1.15416
CecB	-0.619427	-0.534225	1.15365
CecC	-0.913015	-0.155704	1.06872
Ced-12	0.718802	0.423219	-1.14202
ced-6	0.849593	0.252436	-1.10203
Cen	0.9593	0.0769536	-1.03625
CenB1A	1.03469	-0.0734387	-0.961256
CenG1A	-0.57735	-0.57735	1.1547
Cenp-C	1.1543	-0.603568	-0.550729
Cep135	-0.722212	1.14137	-0.419155
cer	-0.017483	1.00863	-0.991144
Cerk	-1.13937	0.407287	0.732085
cert	-1.0588	0.130381	0.928415
cerv	-1.08331	0.195481	0.887826
Cf2	0.775639	-1.12862	0.352983
Cfp1	-0.883737	-0.20176	1.0855
cg	-0.716435	-0.426027	1.14246
CG10011	0.899944	0.176587	-1.07653
CG10026	1.07947	-0.184691	-0.89478
CG10038	-0.596317	1.15449	-0.558174
CG10050	-1.1524	0.513089	0.639309
CG10053	-0.938587	1.05178	-0.113194
CG10055	-0.711838	-0.43146	1.1433
CG10068	-1.03997	0.954554	0.0854136
CG10075	-0.80539	-0.313901	1.11929
CG10077	-1.05411	0.935262	0.118853
CG10082	1.1321	-0.762928	-0.369173
CG10098	-1.02128	0.0440122	0.977267
CG10103	-0.521858	-0.631119	1.15298
CG10126	0.155782	0.912966	-1.06875
CG10139	-0.869569	-0.223157	1.09273
CG10165	-0.867214	-0.226662	1.09388
CG10166	-1.15057	0.490793	0.659779
CG10171	0.719471	0.422422	-1.14189
CG10188	-0.693492	1.14631	-0.452818
CG10189	1.13306	-0.373832	-0.759227
CG10194	1.10139	-0.851031	-0.250361
CG10195	-0.487626	-0.662644	1.15027
CG10208	0.995921	0.00810865	-1.00403
CG10209	-0.260745	-0.843799	1.10454
CG10214	-0.753529	-0.38096	1.13449
CG10222	-0.319898	-0.800909	1.12081
CG1024	0.0178602	0.99095	-1.00881
CG10254	-0.975889	1.02248	-0.0465941
CG10265	-1.14483	0.702881	0.44195
CG10268	0.50031	0.651104	-1.15141
CG10274	-0.947301	1.04546	-0.098158
CG10286	1.03473	-0.0735123	-0.961215
CG10321	1.052	-0.113728	-0.938274
CG10324	-0.956611	-0.0817587	1.03837
CG10333	0.0507252	-1.0244	0.973672
CG10336	0.915062	0.152383	-1.06745
CG10337	1.14948	-0.479742	-0.669736
CG10338	-1.14044	0.413543	0.726897
CG10340	-0.446809	-0.698697	1.14551
CG10341	0.07804	0.958694	-1.03673
CG10343	-1.07463	0.171433	0.903201
CG10347	-1.1541	0.609267	0.544834
CG10353	-0.763235	-0.368786	1.13202
CG10365	0.26983	0.837399	-1.10723
CG10366	0.00548616	0.997246	-1.00273
CG10375	-0.143404	-0.920556	1.06396
CG10376	-0.812987	-0.303639	1.11663
CG10383	-0.274418	-0.834141	1.10856
CG10395	0.685276	-1.1475	0.462221
CG10407	-0.0887353	1.04141	-0.952675
CG10413	0.0538249	0.972001	-1.02583
CG10417	0.776791	-1.12829	0.351501
CG10418	-0.651934	-0.499404	1.15134
CG10425	-0.0335861	1.01637	-0.982784
CG10428	-0.829687	-0.280652	1.11034
CG10431	0.365395	0.765914	-1.13131
CG10433	1.10133	-0.25016	-0.85117
CG10435	-0.252933	-0.849248	1.10218
CG10444	-0.852156	1.10089	-0.248736
CG10445	-1.03334	0.0704061	0.962936
CG10462	-0.740524	-0.397018	1.13754
CG10463	-0.979537	-0.0397417	1.01928
CG10465	-1.15136	0.65166	0.499702
CG10466	-0.591475	-0.563109	1.15458
CG10467	0.633812	0.518983	-1.1528
CG10469	0.540795	0.61315	-1.15394
CG10470	-1.11745	0.810686	0.30676
CG10492	0.09291	0.950303	-1.04321
CG10494	-0.486647	1.15018	-0.663529
CG10495	-0.348164	1.12754	-0.779378
CG10508	0.973425	0.0511834	-1.02461
CG10512	-1.14774	0.464194	0.683541
CG10516	-0.633023	-0.519827	1.15285
CG10527	-0.786067	-0.339478	1.12555
CG10543	1.13169	-0.764499	-0.367187
CG10555	0.337117	-1.12499	0.787874
CG10561	1.14703	-0.458479	-0.688556
CG10565	0.897071	0.181106	-1.07818
CG10576	-1.02593	0.0540525	0.971877
CG10581	-1.15469	0.573843	0.580851
CG10584	1.15271	-0.517598	-0.635108
CG10600	-0.0902353	-0.951824	1.04206
CG10602	0.73174	0.407705	-1.13944
CG10616	-1.10596	0.840447	0.265515
CG10621	1.15366	-0.619231	-0.534431
CG10623	1.04514	-0.0974137	-0.947728
CG10628	1.11328	-0.291196	-0.822082
CG10631	0.574957	0.57974	-1.1547
CG10638	-0.110108	1.0505	-0.940389
CG10646	-0.809087	-0.308922	1.11801
CG10654	0.288058	0.824355	-1.11241
CG10660	-0.0954693	1.04431	-0.948842
CG10672	1.15391	-0.614046	-0.53986
CG10674	-1.14091	0.416356	0.724552
CG10681	-1.12922	0.773526	0.355695
CG10731	-0.284988	1.11156	-0.826571
CG10737	-0.437383	1.14418	-0.706793
CG1074	-1.04919	0.106976	0.942212
CG10747	0.663487	0.486694	-1.15018
CG10764	-1.06048	0.925881	0.134603
CG10778	0.115233	-1.05262	0.937391
CG10795	0.90694	0.165477	-1.07242
CG10802	1.12303	-0.794129	-0.328896
CG10803	0.206978	0.880315	-1.08729
CG10809	-0.152107	-0.915232	1.06734
CG10859	0.551074	0.603234	-1.15431
CG10863	-0.695671	-0.450306	1.14598
CG10874	1.10458	-0.843707	-0.260876
CG10877	0.247782	0.852814	-1.1006
CG10889	-0.174635	1.07581	-0.90118
CG10898	-1.08229	0.192605	0.889688
CG10903	-0.648997	-0.502606	1.1516
CG10904	-0.182466	-0.896203	1.07867
CG10907	0.548904	-1.15424	0.605337
CG10914	-0.397153	1.13757	-0.740413
CG10916	1.08397	-0.886602	-0.197365
CG1092	0.485433	0.664624	-1.15006
CG10927	-0.919595	1.06458	-0.144982
CG10932	1.05777	-0.127844	-0.92993
CG10939	0.843755	0.260806	-1.10456
CG10948	-0.978831	-0.0410718	1.0199
CG10960	-0.789512	-0.334972	1.12448
CG10962	-1.01611	0.983068	0.0330457
CG10973	-0.807894	-0.310532	1.11843
CG10979	1.11842	-0.807903	-0.31052
CG10984	1.15348	-0.530698	-0.622778
CG11007	-0.928425	-0.130363	1.05879
CG1103	0.0323826	0.983415	-1.0158
CG11030	0.517523	-1.1527	0.635178
CG11034	-0.57735	-0.57735	1.1547
CG11035	0.989692	0.0203061	-1.01
CG1105	-0.438977	1.14441	-0.70543
CG11050	-0.777782	-0.350225	1.12801
CG11070	1.14703	-0.458405	-0.68862
CG11076	-0.48321	-0.666625	1.14983
CG11077	-0.963993	-0.0684934	1.03249
CG11089	-1.14892	0.67443	0.474485
CG11095	1.08069	-0.188083	-0.892604
CG11103	0.874235	0.21617	-1.09041
CG11109	-0.715065	-0.42765	1.14272
CG11110	0.973469	-1.02457	0.0511033
CG11122	0.205758	0.881117	-1.08687
CG11123	1.12185	-0.324101	-0.797751
CG11127	-0.33724	-0.78778	1.12502
CG11134	0.812858	-1.11667	0.303815
CG11137	-1.08798	0.208979	0.878997
CG11141	-0.762491	-0.369725	1.13222
CG11151	-1.02755	0.969962	0.0575866
CG11158	0.148013	0.917744	-1.06576
CG1116	-0.731322	-0.40821	1.13953
CG11164	-1.14046	0.7268	0.413659
CG11168	-0.57735	1.1547	-0.57735
CG11170	-0.767859	1.13079	-0.362926
CG11178	-1.00454	0.00915091	0.995393
CG11180	0.27954	-1.11002	0.830484
CG11200	-0.653946	1.15115	-0.497203
CG11236	-0.600273	-0.55412	1.15439
CG11241	-0.943632	1.04816	-0.104526
CG11247	0.215167	-1.09007	0.874902
CG11248	0.552452	0.601895	-1.15435
CG11267	-0.810692	-0.306753	1.11744
CG11279	-1.14175	0.720229	0.421521
CG1129	-0.966825	-0.0633384	1.03016
CG11309	0.939861	0.111014	-1.05087
CG11318	1.09007	-0.215171	-0.874899
CG11334	1.13369	-0.376935	-0.756752
CG11342	-0.81473	-0.301269	1.116
CG11357	-1.00008	0.000163462	0.999918
CG11360	-0.0815286	1.03827	-0.95674
CG11377	1.07125	-0.162373	-0.908877
CG11396	-0.863217	-0.232577	1.09579
CG11399	0.575674	0.579025	-1.1547
CG11403	0.961771	0.0725107	-1.03428
CG11414	-1.14809	0.467217	0.680876
CG11417	-0.828049	-0.282934	1.11098
CG1142	-0.34767	-0.779761	1.12743
CG11436	-0.988518	1.0111	-0.0225818
CG11444	-1.07087	0.161373	0.9095
CG11447	-1.15366	0.619266	0.534395
CG11454	-1.12437	0.334512	0.789862
CG11456	0.550575	-1.15429	0.603718
CG1146	-0.830801	-0.279098	1.1099
CG11474	-1.13298	0.759535	0.373446
CG11486	-0.514215	-0.638263	1.15248
CG11504	-0.171147	1.07453	-0.903381
CG11523	0.765553	0.365854	-1.13141
CG11537	-0.961523	-0.0729576	1.03448
CG11539	1.13515	-0.384342	-0.750809
CG11555	-0.90374	-0.170577	1.07432
CG11560	0.836786	0.270694	-1.10748
CG11562	1.01684	-0.982266	-0.0345708
CG11563	-0.475815	-0.673246	1.14906
CG11583	-1.15411	0.545004	0.609103
CG11586	-0.194001	1.08279	-0.888785
CG11590	-1.11387	0.293348	0.820518
CG11593	0.121088	-1.05503	0.933943
CG11596	-1.06931	0.157256	0.912055
CG11601	-0.987703	-0.0241556	1.01186
CG1161	1.03583	-0.0759906	-0.959837
CG11655	-0.18822	1.08074	-0.892516
CG11679	-1.07374	0.169018	0.904721
CG11686	-0.764883	-0.366702	1.13158
CG11695	-0.677489	-0.471044	1.14853
CG11696	1.11828	-0.808319	-0.309958
CG11699	0.365804	0.765592	-1.1314
CG11710	-0.468147	-0.680054	1.1482
CG1172	-0.402379	-0.73613	1.13851
CG11722	0.742206	0.394956	-1.13716
CG11723	-1.13017	0.770104	0.360069
CG11737	0.310326	0.808047	-1.11837
CG11752	-0.934837	-0.119573	1.05441
CG11753	-0.976108	-0.046184	1.02229
CG11755	0.0872776	0.953501	-1.04078
CG11768	0.805474	0.313788	-1.11926
CG11771	-1.06868	0.913083	0.155593
CG11777	1.13238	-0.761876	-0.3705
CG11779	0.848934	0.253385	-1.10232
CG11781	1.14806	-0.68109	-0.466974
CG11790	-0.598581	-0.555856	1.15444
CG11791	1.15263	-0.636105	-0.51653
CG11807	-1.11961	0.804454	0.315157
CG11808	-1.13075	0.362738	0.768007
CG11811	-1.12014	0.317226	0.80291
CG11837	0.689526	0.457369	-1.14689
CG11839	-1.04601	0.0994511	0.946559
CG11857	-0.822272	-0.290933	1.11321
CG11858	-0.924635	-0.136672	1.06131
CG11873	-0.841035	-0.264679	1.10571
CG11882	0.0519266	0.973025	-1.02495
CG11885	-0.924439	-0.136995	1.06143
CG11899	0.801401	0.319243	-1.12064
CG11902	-0.0498213	1.02398	-0.974158
CG11906	-0.909992	1.07057	-0.160582
CG11920	1.14926	-0.477636	-0.67162
CG11927	1.14995	-0.665576	-0.484376
CG11961	0.556236	0.59821	-1.15445
CG11964	1.15237	-0.639738	-0.512628
CG11970	1.14316	-0.430578	-0.712586
CG11975	-0.977503	1.02107	-0.0435698
CG11980	1.15282	-0.519398	-0.633424
CG11986	-0.430162	1.1431	-0.712939
CG11999	-0.877133	-0.211801	1.08893
CG12004	-0.920525	-0.143456	1.06398
CG12007	-0.971111	-0.0554694	1.02658
CG12012	1.15108	-0.654712	-0.496363
CG12016	-0.220697	1.09191	-0.871217
CG12024	0.479677	0.669795	-1.14947
CG12025	-1.15393	0.540543	0.613391
CG12054	-0.405775	-0.733334	1.13911
CG12056	0.935242	0.118888	-1.05413
CG12065	0.738189	0.399871	-1.13806
CG12071	-1.07225	0.165025	0.907222
CG12081	1.01128	-0.0229558	-0.988324
CG12084	-0.359652	-0.770431	1.13008
CG12091	1.15468	-0.571922	-0.582762
CG12093	-0.869214	1.0929	-0.223687
CG12096	-0.324305	1.1219	-0.797597
CG12099	-0.740018	1.13765	-0.397636
CG12104	-1.09559	0.231956	0.863638
CG12106	-1.02927	0.0613667	0.967903
CG12107	0.770374	-1.1301	0.359725
CG12112	-0.816744	-0.29852	1.11526
CG12118	-1.04088	0.087502	0.953374
CG12121	-1.06238	0.922989	0.139395
CG12123	1.05193	-0.113551	-0.938378
CG12128	-0.425999	1.14246	-0.71646
CG12129	-0.861841	-0.234603	1.09644
CG12133	-0.57735	-0.57735	1.1547
CG12134	0.991228	0.0173185	-1.00855
CG12155	1.08409	-0.197713	-0.886376
CG12159	1.12169	-0.79825	-0.323438
CG12163	-0.693068	1.14637	-0.453305
CG12170	1.0151	-0.0309154	-0.984184
CG12171	0.905498	0.167779	-1.07328
CG12173	-0.495853	-0.655177	1.15103
CG12177	0.481001	0.668608	-1.14961
CG12179	1.1486	-0.471666	-0.676937
CG1218	0.397952	0.73976	-1.13771
CG12204	0.474648	0.674285	-1.14893
CG12213	0.0845893	0.955018	-1.03961
CG12219	0.811191	0.306077	-1.11727
CG12224	-0.585923	-0.568735	1.15466
CG12236	1.10098	-0.851967	-0.249009
CG12237	1.03842	-0.0818684	-0.956549
CG12241	0.292159	0.821382	-1.11354
CG12259	-0.878389	-0.209901	1.08829
CG12267	-0.683683	-0.464033	1.14772
CG1227	0.798279	-1.12168	0.323399
CG12279	-0.897044	-0.181147	1.07819
CG12288	-0.646486	-0.505336	1.15182
CG12290	-1.09772	0.859125	0.23859
CG12301	-0.795084	-0.327634	1.12272
CG12316	-1.00748	0.992351	0.0151256
CG12321	-1.1484	0.678555	0.46984
CG12325	-1.14074	0.725375	0.41537
CG1233	-1.05499	0.934008	0.120978
CG12333	0.0797742	0.957724	-1.0375
CG12338	-1.07725	0.178545	0.898701
CG1234	0.964638	-1.03196	0.0673217
CG12341	-1.1411	0.723566	0.417536
CG12343	-0.969662	1.0278	-0.0581385
CG1236	-0.755901	-0.378	1.1339
CG12375	0.860027	-1.0973	0.237268
CG12379	1.15194	-0.506816	-0.64512
CG12384	-0.983798	-0.0316521	1.01545
CG12391	-0.707847	-0.436149	1.144
CG12499	1.13925	-0.406562	-0.732684
CG12512	-0.419758	1.14147	-0.721707
CG12535	0.536641	0.617124	-1.15377
CG12547	0.406721	-1.13927	0.732553
CG12560	-0.68789	-0.45924	1.14713
CG12567	-1.14251	0.426315	0.716192
CG12576	-0.123669	1.05608	-0.932413
CG12592	0.666047	0.483853	-1.1499
CG12608	0.718182	-1.14214	0.423955
CG12643	0.530737	0.622742	-1.15348
CG1265	-1.00087	0.999126	0.00174522
CG12659	1.15381	-0.616241	-0.537565
CG12699	-0.57735	1.1547	-0.57735
CG12702	0.910244	0.160176	-1.07042
CG1271	0.787146	0.33807	-1.12522
CG12728	-1.09391	0.867139	0.226773
CG12730	0.761152	0.371412	-1.13256
CG12744	-1.07579	0.901225	0.174563
CG12746	-0.144296	-0.920013	1.06431
CG1275	0.568155	0.586497	-1.15465
CG12768	0.750735	0.384434	-1.13517
CG12773	-0.337576	1.1251	-0.787524
CG12795	-0.193912	-0.888842	1.08275
CG12811	1.04113	-0.953041	-0.0880896
CG12818	-1.089	0.212006	0.876997
CG12822	0.548991	0.605252	-1.15424
CG12825	0.196463	0.887188	-1.08365
CG12848	-0.760015	1.13286	-0.372843
CG12863	1.10962	-0.278107	-0.83151
CG12868	-0.604072	-0.55021	1.15428
CG12877	-0.705089	-0.439376	1.14446
CG12883	0.680898	-1.14809	0.467192
CG12895	-1.06862	0.155439	0.913178
CG12896	0.682195	0.465722	-1.14792
CG12909	-0.745809	-0.390526	1.13634
CG12920	-0.57735	1.1547	-0.57735
CG12929	1.04671	-0.101111	-0.945603
CG12934	0.974181	0.0497787	-1.02396
CG12935	1.10919	-0.276623	-0.83257
CG12945	-0.822751	-0.290273	1.11302
CG12948	1.14093	-0.724425	-0.416508
CG12974	-0.615288	-0.538563	1.15385
CG12975	1.11867	-0.807192	-0.311477
CG13001	-0.805167	-0.314201	1.11937
CG13014	-0.321612	-0.799623	1.12124
CG13016	-1.14663	0.455262	0.691364
CG13018	-0.795866	1.12247	-0.326599
CG13025	1.11824	-0.309809	-0.80843
CG1307	-0.868664	1.09317	-0.224506
CG13077	-0.261244	1.10469	-0.843448
CG13086	-0.898894	1.07713	-0.178241
CG1309	0.796321	0.325998	-1.12232
CG13096	0.0223199	-1.01097	0.988653
CG13097	0.498773	-1.15128	0.652511
CG13116	-0.531542	-0.621978	1.15352
CG13117	-0.455733	-0.690954	1.14669
CG13123	-1.01348	0.985947	0.0275371
CG13124	-0.278862	-0.830969	1.10983
CG13126	1.05206	-0.113865	-0.938193
CG1316	0.567914	0.586735	-1.15465
CG1317	-0.498321	1.15125	-0.652924
CG13185	-1.12004	0.803185	0.316858
CG13192	0.292996	-1.11377	0.820774
CG13197	0.00457442	-1.00228	0.997705
CG13220	-0.642659	-0.509479	1.15214
CG13248	-0.57735	1.1547	-0.57735
CG13295	-0.676811	-0.471808	1.14862
CG13315	-1.0734	0.905291	0.168109
CG13319	-1.03194	0.0672745	0.964664
CG13339	-0.753073	-0.381527	1.1346
CG13344	-0.892298	1.08086	-0.188558
CG13364	-0.999902	-0.000196755	1.0001
CG13365	-1.02319	0.0481239	0.975069
CG13366	1.13312	-0.758979	-0.374144
CG13367	-0.232704	-0.863131	1.09583
CG13369	-0.238183	-0.859403	1.09759
CG13373	-0.288645	-0.82393	1.11258
CG13377	0.933696	0.121505	-1.0552
CG13384	-1.13413	0.379169	0.754965
CG13390	-0.951171	-0.0913849	1.04256
CG13392	-1.15263	0.516418	0.636209
CG13397	-1.1375	0.740719	0.396779
CG13398	-1.06957	0.911626	0.157948
CG1344	-0.722209	1.14137	-0.419159
CG13484	0.911239	0.158573	-1.06981
CG13506	-0.57735	-0.57735	1.1547
CG13510	0.570304	0.584368	-1.15467
CG13511	0.570304	0.584368	-1.15467
CG13531	-0.400323	1.13814	-0.737818
CG1354	0.793704	0.329457	-1.12316
CG13551	-0.833248	-0.275672	1.10892
CG13559	-0.644911	-0.507042	1.15195
CG13585	-0.985558	-0.0282836	1.01384
CG13599	-0.777179	1.12818	-0.351001
CG13601	-1.12458	0.789211	0.335366
CG13603	0.889275	0.193243	-1.08252
CG13605	-0.703674	1.1447	-0.441026
CG13623	-0.928973	1.05842	-0.129448
CG13625	-0.692395	-0.454079	1.14647
CG13630	-0.531891	-0.621646	1.15354
CG13631	-1.08352	0.196083	0.887435
CG13654	-0.560522	1.15454	-0.594016
CG13663	-0.788855	-0.335834	1.12469
CG13667	-0.746264	1.13623	-0.389965
CG13671	1.09791	-0.239192	-0.858714
CG13689	0.212557	-1.08919	0.876633
CG13690	-1.14764	0.463393	0.684246
CG1371	0.078809	0.958264	-1.03707
CG13742	1.12766	-0.778967	-0.348696
CG13743	0.54254	0.611474	-1.15401
CG13751	-0.426648	1.14256	-0.715911
CG13760	0.970067	0.0573939	-1.02746
CG13766	0.916962	0.149289	-1.06625
CG13773	-1.02754	0.0575664	0.969973
CG13775	1.14738	-0.461249	-0.686129
CG13784	1.14748	-0.462044	-0.685431
CG13807	-1.06495	0.14593	0.919017
CG13827	1.08567	-0.883407	-0.202263
CG13850	-1.05724	0.126525	0.930716
CG13868	-0.671922	-0.477299	1.14922
CG13876	-0.962243	-0.0716597	1.0339
CG13887	-0.201292	-0.884043	1.08533
CG13895	0.0114479	0.994227	-1.00567
CG13896	-0.871283	-0.220598	1.09188
CG13901	-1.14401	0.436268	0.707746
CG13907	0.168374	0.905125	-1.0735
CG13917	-0.453276	1.14637	-0.693093
CG13919	-1.12755	0.779348	0.348203
CG13926	-1.09964	0.2447	0.854938
CG13933	0.713497	0.429503	-1.143
CG13937	-0.514211	-0.638266	1.15248
CG13982	0.983303	0.0325965	-1.0159
CG13994	-1.09845	0.240911	0.857538
CG14036	0.429262	0.713701	-1.14296
CG14043	-1.11353	0.821419	0.292109
CG14057	-1.12943	0.772793	0.356633
CG1407	-1.0107	0.0217603	0.988942
CG14073	-0.395479	-0.741781	1.13726
CG14079	0.119269	0.935017	-1.05429
CG14100	-0.770779	-0.359208	1.12999
CG14104	0.872709	0.218462	-1.09117
CG14117	0.922037	0.140967	-1.063
CG14130	0.355389	-1.12915	0.773765
CG14135	-0.827667	-0.283465	1.11113
CG14142	0.0411113	0.97881	-1.01992
CG1416	1.05719	-0.930791	-0.126398
CG1418	-0.896648	-0.181768	1.07842
CG14182	-1.10941	0.832023	0.277388
CG14184	-0.618717	-0.534971	1.15369
CG14194	-1.11928	0.805432	0.313845
CG14200	0.309672	0.808532	-1.1182
CG14207	0.476544	-1.14914	0.672595
CG14210	-1.1518	0.505009	0.646787
CG14220	-1.15298	0.6311	0.521877
CG14229	-1.15358	0.620826	0.532755
CG14230	-0.991004	-0.0177556	1.00876
CG14231	1.08172	-0.190978	-0.890739
CG14232	1.01891	-0.97995	-0.0389618
CG14253	-0.476816	-0.672353	1.14917
CG14270	0.415616	-1.14079	0.725169
CG14286	-0.511841	1.15231	-0.640469
CG14322	-1.04006	0.954433	0.0856277
CG14332	1.14485	-0.442105	-0.702748
CG1434	0.749735	0.385673	-1.13541
CG14341	-0.674577	-0.474321	1.1489
CG14352	-0.627858	-0.525324	1.15318
CG1440	0.150003	0.916525	-1.06653
CG14407	-1.09185	0.220504	0.871346
CG14408	-0.819915	-0.294176	1.11409
CG14411	-1.1367	0.744254	0.392442
CG14414	-1.0012	0.998794	0.00240792
CG14431	-1.15271	0.51773	0.634984
CG14434	-0.74755	-0.388378	1.13593
CG14435	0.321755	0.799516	-1.12127
CG14440	-0.0524515	1.02519	-0.972742
CG14441	-0.436741	1.14408	-0.707342
CG14442	-0.88077	-0.206286	1.08706
CG14450	-1.15035	0.488479	0.661874
CG14464	-0.695502	-0.450502	1.146
CG14478	1.15462	-0.565846	-0.588778
CG14480	-0.0804665	-0.957336	1.0378
CG14483	-0.887371	-0.196181	1.08355
CG14491	0.386628	0.748965	-1.13559
CG14511	-1.13539	0.385558	0.749829
CG14512	-1.1465	0.692209	0.454292
CG14543	-0.614079	-0.539826	1.1539
CG14544	-1.11901	0.312795	0.806213
CG14561	1.15429	-0.550462	-0.603827
CG14562	0.937776	0.114578	-1.05235
CG14567	0.550933	0.603371	-1.1543
CG14610	-0.711783	-0.431525	1.14331
CG14613	-0.511678	-0.64062	1.1523
CG14615	0.310608	0.807837	-1.11845
CG14618	-1.12438	0.334537	0.789844
CG14621	0.77611	0.352377	-1.12849
CG14629	-0.271287	1.10765	-0.836366
CG1463	0.945993	0.100435	-1.04643
CG14641	-0.994873	-0.0101758	1.00505
CG14642	0.779952	0.347422	-1.12737
CG14646	1.08007	-0.893717	-0.18635
CG14647	1.12588	-0.340899	-0.784978
CG14650	0.407078	0.732258	-1.13934
CG14657	1.10411	-0.259293	-0.844815
CG14667	0.0646968	-1.03078	0.966081
CG14671	-0.264448	-0.841198	1.10565
CG14683	-0.312922	-0.806119	1.11904
CG14688	0.024337	-1.01195	0.987609
CG14695	0.773659	0.355524	-1.12918
CG14696	-0.876654	-0.212524	1.08918
CG14701	1.14897	-0.673973	-0.474999
CG14711	-1.12148	0.322594	0.798885
CG14712	-0.686187	1.14737	-0.461183
CG14715	0.897014	0.181195	-1.07821
CG14721	1.1136	-0.292361	-0.821236
CG14722	-1.05319	0.116613	0.936581
CG14764	0.872154	0.219294	-1.09145
CG14767	-0.604082	1.15428	-0.550199
CG14777	0.816743	-1.11526	0.298521
CG14803	-0.458062	1.14698	-0.68892
CG14805	-0.926219	-0.134042	1.06026
CG14806	-0.676262	1.14869	-0.472426
CG14812	-1.14734	0.460927	0.686412
CG14814	0.433039	0.710496	-1.14354
CG14817	-1.02129	0.0440425	0.977251
CG14818	1.12545	-0.339075	-0.786376
CG1486	-1.15302	0.630469	0.52255
CG14881	-1.14668	0.690986	0.455697
CG14882	-1.06175	0.923963	0.137785
CG14883	-0.699449	-0.445938	1.14539
CG14894	-1.13573	0.387319	0.748406
CG14903	-1.07328	0.167798	0.905486
CG14906	-0.587015	-0.567631	1.15465
CG14907	1.1545	-0.558468	-0.596029
CG14957	0.960229	0.0752868	-1.03552
CG14961	-0.713932	-0.428989	1.14292
CG14966	0.748908	-1.13561	0.386698
CG14969	1.13487	-0.38288	-0.751986
CG14971	-0.384207	1.13512	-0.750918
CG14977	-1.13983	0.409945	0.729885
CG14985	0.199272	-1.08463	0.88536
CG14990	-0.781995	-0.344776	1.12677
CG14995	-0.62113	-0.532434	1.15356
CG14997	-0.878956	-0.209042	1.088
CG15011	-0.665697	-0.484242	1.14994
CG15012	-0.774392	-0.354584	1.12898
CG15014	-0.469255	-0.679074	1.14833
CG15019	-0.88608	-0.198167	1.08425
CG15027	-0.83719	-0.270124	1.10731
CG15073	1.06163	-0.137485	-0.924144
CG15083	-0.631573	1.15295	-0.521373
CG15093	1.10074	-0.852499	-0.248238
CG15098	-1.14098	0.724173	0.41681
CG15099	-0.294998	1.11431	-0.819317
CG15107	-1.10508	0.26253	0.842546
CG15111	0.856961	-1.09871	0.241753
CG15118	0.346729	0.780487	-1.12722
CG1513	-0.925276	-0.135608	1.06088
CG15141	1.15456	-0.593027	-0.561531
CG15160	-0.0829471	1.03889	-0.955943
CG15168	-0.36554	1.13134	-0.7658
CG15209	-0.307799	1.11772	-0.809918
CG15211	-1.12648	0.343505	0.782975
CG1523	-0.824456	1.11237	-0.287918
CG15237	-0.777081	1.12821	-0.351127
CG1529	-0.661139	1.15043	-0.489291
CG15309	0.741899	0.395333	-1.13723
CG15317	1.14239	-0.425569	-0.716822
CG1532	1.04234	-0.0908943	-0.95145
CG15343	0.963982	0.0685124	-1.03249
CG15347	-0.831591	-0.277993	1.10958
CG15356	-0.389212	1.13609	-0.746874
CG15362	-1.06738	0.152224	0.915161
CG15382	1.09088	-0.217596	-0.873286
CG15386	0.802868	0.317282	-1.12015
CG15387	-1.11495	0.297368	0.817587
CG15399	-0.0478972	1.02309	-0.975191
CG1542	-0.670051	1.14944	-0.479391
CG15423	-0.57735	-0.57735	1.1547
CG15432	-1.1386	0.735733	0.402862
CG15435	1.15424	-0.548845	-0.605394
CG15439	1.15413	-0.545718	-0.608415
CG1544	1.10943	-0.831979	-0.27745
CG15443	0.0253926	-1.01245	0.987062
CG15445	0.922731	0.139822	-1.06255
CG15456	-0.984169	-0.0309446	1.01511
CG15482	0.991077	0.0176127	-1.00869
CG15514	1.14113	-0.4177	-0.72343
CG15525	-1.10293	0.255394	0.847536
CG15535	-0.296796	1.1148	-0.818005
CG15536	-0.339235	-0.786254	1.12549
CG15547	1.14156	-0.721225	-0.420333
CG15561	-0.419014	-0.72233	1.14134
CG15601	0.245486	-1.09988	0.854397
CG15602	-1.12295	0.328587	0.794363
CG15611	-0.662428	-0.487866	1.15029
CG15643	0.848568	0.253912	-1.10248
CG15653	-0.498862	-0.65243	1.15129
CG15695	0.598787	0.555645	-1.15443
CG15706	-0.0087341	1.00434	-0.995604
CG15715	1.05262	-0.937396	-0.115225
CG15717	-0.883394	-0.202284	1.08568
CG1572	-0.84101	-0.264715	1.10573
CG15739	1.11538	-0.298945	-0.816433
CG15740	-0.57735	1.1547	-0.57735
CG15743	0.613879	0.540035	-1.15391
CG15744	1.12527	-0.338284	-0.786982
CG15747	-0.745648	-0.390724	1.13637
CG1575	1.15089	-0.656585	-0.494309
CG15771	1.10207	-0.849505	-0.252562
CG1578	0.480445	0.669106	-1.14955
CG15784	0.924959	0.136134	-1.06109
CG15812	0.555963	0.598477	-1.15444
CG15814	1.11168	-0.285416	-0.826262
CG15818	-0.540377	-0.61355	1.15393
CG1582	1.04471	-0.0963993	-0.948309
CG15820	-1.06607	0.148824	0.917247
CG15873	-0.57735	1.1547	-0.57735
CG15877	-1.13518	0.750704	0.384472
CG15879	0.841032	-1.10572	0.264684
CG15891	1.00261	-0.997365	-0.00524905
CG15908	-1.06736	0.15217	0.915194
CG15912	-0.972181	1.02567	-0.053491
CG15914	1.09304	-0.224121	-0.868922
CG15916	-1.05369	0.935868	0.117825
CG15922	-1.03376	0.962425	0.0713306
CG15923	1.01969	-0.0406195	-0.979071
CG1598	-0.984394	-0.0305129	1.01491
CG1603	0.813134	-1.11657	0.30344
CG1620	-0.973828	1.02426	-0.0504357
CG1622	-0.474502	1.14892	-0.674415
CG1628	-0.909911	-0.160712	1.07062
CG1632	0.732419	0.406883	-1.1393
CG1635	1.14296	-0.713739	-0.429217
CG1636	1.01643	-0.0337156	-0.982716
CG1637	1.05664	-0.931596	-0.125045
CG1640	0.916049	0.150778	-1.06683
CG1646	-0.558018	1.15449	-0.596469
CG1647	0.227485	-1.09414	0.86666
CG1648	-0.654259	-0.496861	1.15112
CG1662	-1.15468	0.583946	0.570729
CG1671	0.117904	0.935822	-1.05373
CG16710	-0.74329	-0.393626	1.13692
CG16711	1.14859	-0.471578	-0.677015
CG16713	-0.57735	-0.57735	1.1547
CG16717	-0.984214	1.01507	-0.0308574
CG16721	0.934034	0.120933	-1.05497
CG1673	1.12274	-0.327711	-0.795026
CG16734	-0.538361	-0.615481	1.15384
CG16743	-1.07787	0.18026	0.89761
CG16753	-0.455093	-0.691512	1.1466
CG16758	-0.520048	-0.632815	1.15286
CG1677	-0.786946	1.12528	-0.33833
CG16787	-0.983966	-0.0313307	1.0153
CG16790	-0.990734	-0.0182806	1.00901
CG16791	-1.14544	0.699116	0.446324
CG16812	-0.650154	1.1515	-0.501346
CG16865	-0.170306	1.07422	-0.903911
CG16868	-0.57735	1.1547	-0.57735
CG16890	1.03475	-0.0735559	-0.961191
CG16896	1.1366	-0.391927	-0.744672
CG16903	0.908403	0.163134	-1.07154
CG16908	-0.88839	-0.19461	1.083
CG16926	-0.64848	-0.503169	1.15165
CG16935	-0.737522	1.13821	-0.400684
CG16952	0.990606	0.0185297	-1.00914
CG16953	0.244958	0.854761	-1.09972
CG16957	1.0473	-0.102491	-0.944808
CG16972	-0.555511	1.15443	-0.598917
CG16974	0.66703	0.482759	-1.14979
CG16979	0.161181	0.909619	-1.0708
CG16985	-1.01838	0.0378292	0.980549
CG16986	1.03407	-0.962028	-0.0720467
CG16989	1.05184	-0.113345	-0.938498
CG17002	1.13013	-0.359852	-0.770274
CG17019	0.764149	0.36763	-1.13178
CG17029	-1.03699	0.958374	0.0786122
CG1703	-0.649884	-0.50164	1.15152
CG17059	1.08676	-0.881328	-0.205436
CG17065	0.878886	0.209147	-1.08803
CG17068	0.760323	0.372455	-1.13278
CG17078	-0.241861	1.09875	-0.856888
CG17109	-0.993271	1.0066	-0.0133247
CG17119	0.900381	-1.07628	0.175896
CG17124	-0.304308	1.1168	-0.812495
CG17141	-1.10964	0.278189	0.831451
CG17159	0.755438	0.378578	-1.13402
CG17162	0.187639	0.892889	-1.08053
CG17168	-0.870248	-0.222144	1.09239
CG17187	1.02754	-0.0575651	-0.969974
CG17202	-0.128365	-0.929619	1.05798
CG17219	-1.07167	0.163482	0.908186
CG17221	0.611772	-1.154	0.542231
CG17233	-0.521173	1.15293	-0.631761
CG17249	0.709522	-1.14371	0.434183
CG17260	-1.14391	0.708335	0.435577
CG17266	1.07866	-0.182429	-0.896227
CG17271	-0.306446	-0.810918	1.11736
CG17272	1.15456	-0.561571	-0.592987
CG17278	-0.568574	-0.586082	1.15466
CG17292	-1.04536	0.947431	0.0979321
CG17294	0.503533	-1.15168	0.648145
CG17327	-0.377382	-0.756394	1.13378
CG17333	-0.935484	-0.118477	1.05396
CG17343	-0.209741	-0.878495	1.08824
CG17359	-1.00028	0.000561173	0.999719
CG17361	-0.257753	-0.845892	1.10364
CG1737	0.234376	0.861996	-1.09637
CG1738	-1.07111	0.909112	0.161997
CG17385	-1.09152	0.21951	0.872009
CG17454	-0.77608	-0.352416	1.1285
CG17486	-0.407722	-0.731725	1.13945
CG17490	-0.524855	-0.6283	1.15315
CG17493	1.12388	-0.332433	-0.791445
CG17508	-0.771071	-0.358834	1.12991
CG17528	-0.281899	-0.828793	1.11069
CG17544	-1.08923	0.212672	0.876556
CG17556	-0.134393	1.0604	-0.926008
CG17565	-0.925648	1.06064	-0.134991
CG17568	-1.00061	0.999389	0.001221
CG17574	0.468449	0.679787	-1.14824
CG17593	-0.779408	-0.348125	1.12753
CG17597	0.821593	0.291869	-1.11346
CG17598	-0.644189	1.15201	-0.507824
CG17600	-0.809588	-0.308245	1.11783
CG1764	-1.12182	0.323991	0.797834
CG17646	-0.41908	1.14135	-0.722275
CG17652	-0.705276	-0.439157	1.14443
CG17660	0.494967	-1.15095	0.655985
CG17683	-0.885487	-0.199078	1.08456
CG17691	-0.829134	-0.281423	1.11056
CG17698	0.627538	-1.1532	0.525664
CG17712	-1.15093	0.656181	0.494752
CG17715	0.734423	0.404453	-1.13888
CG17721	-1.04272	0.0917571	0.950959
CG17724	1.05235	-0.114563	-0.937785
CG17726	-0.546903	-0.607272	1.15417
CG17734	-0.545195	-0.60892	1.15411
CG1774	1.04184	-0.0897373	-0.952107
CG17746	-1.09198	0.220905	0.871077
CG17754	1.03383	-0.071488	-0.962338
CG17760	-0.723773	-0.417289	1.14106
CG17765	-0.809504	-0.308359	1.11786
CG17768	-0.39074	-0.745636	1.13638
CG17776	0.190269	0.891196	-1.08147
CG17786	-0.0525042	1.02522	-0.972714
CG17807	0.61904	0.534632	-1.15367
CG17829	-0.736625	1.1384	-0.401777
CG17834	-0.694326	-0.451858	1.14618
CG17839	0.432838	0.710667	-1.1435
CG17841	1.09832	-0.857817	-0.240503
CG1785	0.788179	0.336718	-1.1249
CG17855	-0.295271	-0.819117	1.11439
CG17883	0.160383	-1.0705	0.910115
CG1789	-0.541329	-0.612637	1.15397
CG17896	-0.0446897	-0.976906	1.0216
CG17904	-1.14816	0.680332	0.467832
CG1792	-0.983676	1.01556	-0.0318853
CG17928	1.03955	-0.0844602	-0.955091
CG17931	0.648479	0.50317	-1.15165
CG17977	-0.963984	-0.0685084	1.03249
CG17982	-0.648052	-0.503634	1.15169
CG17985	-0.879559	-0.208127	1.08769
CG17996	-0.926205	-0.134064	1.06027
CG18004	1.15466	-0.585971	-0.568687
CG18048	-0.00876008	1.00435	-0.995591
CG18081	-0.518537	1.15277	-0.63423
CG1812	1.0926	-0.869823	-0.222778
CG18135	0.0843956	0.955128	-1.03952
CG1814	0.303872	0.812816	-1.11669
CG1815	-0.824088	1.11251	-0.288427
CG18178	-0.84843	-0.254111	1.10254
CG18213	-0.458383	1.14702	-0.688639
CG1824	-0.992462	-0.0149093	1.00737
CG18249	-0.797108	1.12206	-0.324954
CG18259	-0.507635	1.152	-0.644364
CG18262	1.00139	-0.00277857	-0.998608
CG1827	0.945063	0.102049	-1.04711
CG18273	0.557162	0.597306	-1.15447
CG18324	-0.562978	-0.591605	1.15458
CG18343	-0.704357	1.14459	-0.44023
CG1840	-0.163217	1.07157	-0.908351
CG18428	-1.03728	0.079273	0.958004
CG18446	0.795358	0.327273	-1.12263
CG1847	0.38202	0.752677	-1.1347
CG18508	-1.13413	0.754976	0.379155
CG18528	0.711084	0.432347	-1.14343
CG18547	1.03999	-0.0854585	-0.954528
CG18549	-0.0545043	1.02614	-0.971633
CG18577	-0.57735	1.1547	-0.57735
CG18596	0.385237	0.750087	-1.13532
CG18600	-1.08602	0.203286	0.882738
CG18659	-0.721368	-0.420162	1.14153
CG18661	0.883292	0.202439	-1.08573
CG18731	-1.14275	0.427898	0.714855
CG18744	0.658045	0.492703	-1.15075
CG18745	0.721764	0.41969	-1.14145
CG18747	-0.201212	-0.884094	1.08531
CG18749	-0.340682	-0.785144	1.12583
CG18754	-0.643491	1.15207	-0.50858
CG18766	0.613218	0.540724	-1.15394
CG18787	0.0740114	0.960938	-1.03495
CG18789	0.62975	0.523314	-1.15306
CG18809	0.856031	-1.09914	0.243109
CG18815	-1.08174	0.191053	0.890691
CG1882	1.01479	-0.0302624	-0.984525
CG18853	0.970287	0.0569889	-1.02728
CG18858	0.550962	0.603342	-1.1543
CG1888	-1.15392	0.613833	0.540082
CG1890	-0.959429	-0.0767219	1.03615
CG1896	-0.960744	-0.0743609	1.0351
CG1902	0.149683	0.916721	-1.0664
CG1907	-0.342277	-0.783919	1.1262
CG1910	-0.796658	-0.32555	1.12221
CG1927	-0.949272	-0.0947169	1.04399
CG1943	-0.880021	-0.207425	1.08745
CG1951	0.930367	0.127112	-1.05748
CG1965	0.70663	0.437575	-1.1442
CG1979	-0.57735	1.1547	-0.57735
CG1983	0.205746	0.881125	-1.08687
CG1998	0.0427169	-1.02067	0.977957
CG2003	-0.699127	-0.446311	1.14544
CG2004	-0.738888	-0.399018	1.13791
CG2006	0.764919	0.366656	-1.13158
CG2017	0.974226	0.0496956	-1.02392
CG2021	0.289523	0.823294	-1.11282
CG2023	-0.301942	1.11618	-0.814236
CG2034	-0.564415	-0.590189	1.1546
CG2059	1.03388	-0.962264	-0.0716205
CG2061	0.413829	0.726659	-1.14049
CG2063	-0.472212	1.14866	-0.676452
CG2064	0.426988	0.715625	-1.14261
CG2065	-0.707671	-0.436356	1.14403
CG2076	-1.12865	0.353116	0.775536
CG2082	-0.121936	1.05538	-0.933441
CG2091	0.861709	-1.09651	0.234798
CG2100	-1.05625	0.932166	0.124087
CG2116	0.291723	0.821699	-1.11342
CG2124	-0.59398	1.15454	-0.56056
CG2126	-0.760552	-0.372167	1.13272
CG2129	-0.867105	1.09393	-0.226824
CG2147	-1.13565	0.38694	0.748713
CG2162	-0.55827	1.15449	-0.596222
CG2182	-1.09756	0.238091	0.859466
CG2186	0.428925	0.713987	-1.14291
CG2199	-0.872686	-0.218496	1.09118
CG2200	-0.978916	-0.0409119	1.01983
CG2201	-1.12985	0.358595	0.771259
CG2202	1.05068	-0.110552	-0.94013
CG2211	-1.03348	0.0707245	0.96276
CG2218	0.259194	0.844884	-1.10408
CG2225	1.14731	-0.46066	-0.686646
CG2246	-1.05722	0.126463	0.930753
CG2247	-1.04201	0.0901293	0.951884
CG2258	0.966042	0.0647674	-1.03081
CG2260	-0.576473	1.1547	-0.578227
CG2277	0.519282	-1.15281	0.633533
CG2278	0.808924	0.309143	-1.11807
CG2310	-1.1144	0.295312	0.819087
CG2444	-0.365006	-0.766221	1.13123
CG2493	-0.666783	1.14982	-0.483034
CG2519	-0.0808427	1.03797	-0.957125
CG2540	-1.15458	0.592026	0.562549
CG2608	-0.948189	1.0448	-0.0966102
CG2611	1.14242	-0.425771	-0.716651
CG2614	-1.05788	0.929771	0.128111
CG2641	-0.737953	-0.400158	1.13811
CG2656	-0.704527	-0.440032	1.14456
CG2678	1.01151	-0.0234392	-0.988074
CG2685	1.14842	-0.470026	-0.678391
CG2691	0.231426	0.863997	-1.09542
CG2694	0.771548	0.358225	-1.12977
CG2698	0.533243	0.620362	-1.1536
CG2701	0.245254	0.854557	-1.09981
CG2747	0.121742	0.933555	-1.0553
CG2765	0.666188	-1.14988	0.483695
CG2767	-0.754984	-0.379145	1.13413
CG2790	-0.670172	-0.479256	1.14943
CG2794	0.573508	-1.15469	0.581184
CG2811	0.882407	0.203791	-1.0862
CG2818	0.663031	0.487198	-1.15023
CG2841	0.657228	0.493602	-1.15083
CG2846	0.221794	-1.09228	0.870482
CG2852	1.15452	-0.559628	-0.594893
CG2865	-0.532469	-0.621097	1.15357
CG2875	0.831128	0.27864	-1.10977
CG2889	-1.07777	0.897776	0.179998
CG2906	0.724099	0.416898	-1.141
CG2909	0.537869	0.615952	-1.15382
CG2911	-0.591562	1.15458	-0.563021
CG2915	-0.0845867	1.03961	-0.95502
CG2918	-0.0770415	-0.959251	1.03629
CG2921	-0.96633	-0.0642427	1.03057
CG2924	-0.320829	-0.800211	1.12104
CG2926	-0.624878	-0.52848	1.15336
CG2931	-1.13095	0.363675	0.76727
CG2938	-0.733075	1.13916	-0.406088
CG2972	1.14128	-0.418591	-0.722684
CG2990	-0.0537948	1.02581	-0.972017
CG2991	-0.0165846	1.00819	-0.991605
CG30015	-0.529838	1.15343	-0.623593
CG30020	0.35195	0.776442	-1.12839
CG30022	-0.94258	-0.10634	1.04892
CG30046	0.524185	0.628931	-1.15312
CG30069	-0.199454	-0.885242	1.0847
CG3008	-0.993919	-0.0120525	1.00597
CG30089	0.985063	0.0292321	-1.0143
CG30090	-0.602546	-0.551782	1.15433
CG30091	-0.426749	-0.715827	1.14258
CG30094	-1.15467	0.584566	0.570104
CG30100	-0.946687	-0.0992269	1.04591
CG30105	-1.11493	0.817641	0.297293
CG30108	-0.178319	-0.898844	1.07716
CG30109	-0.661403	-0.489	1.1504
CG30120	-0.682242	-0.465668	1.14791
CG30122	-0.911476	-0.158192	1.06967
CG30148	-0.659792	-0.490778	1.15057
CG30159	0.553025	0.601339	-1.15436
CG30183	-0.590543	1.1546	-0.564057
CG30187	-0.678573	-0.469821	1.14839
CG3021	-1.14985	0.666493	0.483357
CG30269	-0.769243	-0.361166	1.13041
CG30283	-0.586398	-0.568256	1.15465
CG30291	1.12106	-0.320912	-0.800149
CG30338	-1.03737	0.0794903	0.957883
CG30344	0.0276805	0.985872	-1.01355
CG30349	-0.97887	1.01987	-0.040998
CG3036	-0.62413	-0.529271	1.1534
CG30373	-0.868401	1.0933	-0.224897
CG3038	-1.10644	0.839312	0.267124
CG30382	0.598916	0.555512	-1.15443
CG30389	1.09451	-0.865904	-0.228605
CG30392	-0.737879	1.13813	-0.400249
CG30394	-0.93201	-0.12435	1.05636
CG3040	1.02734	-0.970211	-0.0571289
CG30403	-0.778591	-0.349181	1.12777
CG30414	0.786501	0.338912	-1.12541
CG30423	-0.764204	-0.367561	1.13176
CG30428	-0.539458	-0.614431	1.15389
CG30430	-0.0502169	1.02416	-0.973945
CG3045	1.15316	-0.524997	-0.628166
CG30456	-1.15333	0.528002	0.625331
CG30466	0.0588204	0.969292	-1.02811
CG30467	-0.946695	1.04591	-0.0992146
CG30491	-0.451319	-0.694793	1.14611
CG30496	0.917909	0.147744	-1.06565
CG3061	1.15127	-0.498619	-0.652652
CG3065	1.15007	-0.48552	-0.664545
CG3071	-1.02391	0.974235	0.0496775
CG3091	0.24256	0.856408	-1.09897
CG31051	0.803334	0.316658	-1.11999
CG31064	-0.971725	-0.0543345	1.02606
CG3107	-1.06031	0.926139	0.134174
CG31075	-1.06374	0.142829	0.920906
CG31098	0.0608984	-1.02906	0.968159
CG31109	1.12321	-0.793555	-0.329655
CG31111	-1.0281	0.0587891	0.969309
CG31122	1.15317	-0.628106	-0.525061
CG31126	-0.816828	-0.298406	1.11523
CG31142	-0.698246	1.14558	-0.447331
CG31156	-0.932456	-0.123598	1.05605
CG31174	-0.348301	-0.779272	1.12757
CG31195	-0.748776	1.13564	-0.386862
CG31211	0.890881	-1.08164	0.190758
CG31219	-0.897652	-0.180193	1.07785
CG31223	1.02034	-0.0419952	-0.978341
CG31224	0.601721	-1.15435	0.552631
CG31229	-0.528621	-0.624745	1.15337
CG31249	0.712275	-1.14322	0.430944
CG31251	1.0562	-0.932248	-0.123948
CG31278	-0.423303	-0.718731	1.14203
CG31287	0.517848	0.634874	-1.15272
CG31301	-1.1233	0.330015	0.793281
CG31324	-0.33595	1.12472	-0.788766
CG31337	-0.0127196	1.0063	-0.99358
CG31342	0.0527865	0.972561	-1.02535
CG31344	-0.951263	-0.0912234	1.04249
CG31357	-1.05259	0.115141	0.937446
CG31360	-1.02434	0.0505994	0.97374
CG31365	0.555244	0.599178	-1.15442
CG31368	-1.11338	0.291576	0.821806
CG31370	0.155113	-1.06849	0.91338
CG31431	0.445546	0.699786	-1.14533
CG31457	0.0874614	0.953397	-1.04086
CG31460	-0.34199	-0.78414	1.12613
CG3149	0.67997	0.468241	-1.14821
CG31510	-0.957764	1.03747	-0.0797023
CG31522	-0.595705	1.1545	-0.558799
CG31523	-1.0379	0.0806791	0.957217
CG31548	-0.463542	-0.684114	1.14766
CG31549	0.71304	0.430043	-1.14308
CG31550	0.347938	0.779553	-1.12749
CG3156	-1.01451	0.0296721	0.984834
CG3163	0.113676	-1.05198	0.938304
CG31635	0.913861	0.154334	-1.06819
CG31637	0.878652	0.209502	-1.08815
CG31638	0.254144	0.848407	-1.10255
CG3164	0.503763	0.647934	-1.1517
CG31643	-0.46205	1.14748	-0.685426
CG31648	1.11715	-0.305621	-0.811527
CG3165	-0.0952753	-0.948952	1.04423
CG31650	0.659452	0.491154	-1.15061
CG31673	-0.232711	1.09584	-0.863126
CG31678	1.04407	-0.0949007	-0.949167
CG31683	0.538791	0.61507	-1.15386
CG31687	-0.0545339	1.02615	-0.971617
CG31688	0.343798	0.782748	-1.12655
CG31689	0.500285	0.651127	-1.15141
CG31694	-0.929687	1.05794	-0.128252
CG31705	0.804061	0.315684	-1.11975
CG31710	-0.592163	-0.56241	1.15457
CG31712	0.569537	-1.15467	0.585128
CG31715	-0.863225	-0.232566	1.09579
CG31717	-0.15206	-0.915261	1.06732
CG31729	-1.15093	0.494688	0.656239
CG31751	-0.381787	1.13465	-0.752865
CG31759	0.425291	-1.14235	0.717056
CG3176	0.489035	0.661371	-1.15041
CG31777	-0.880122	1.08739	-0.207272
CG31778	-0.88703	1.08374	-0.196707
CG31800	0.94504	-1.04713	0.102088
CG31821	-0.57735	-0.57735	1.1547
CG31832	-0.521749	1.15297	-0.631221
CG3184	-0.985684	1.01373	-0.0280423
CG31855	1.08058	-0.892803	-0.187772
CG31886	-1.06735	0.152141	0.915211
CG31898	-0.831996	1.10942	-0.277427
CG31908	0.858897	0.238925	-1.09782
CG3191	-0.837204	-0.270105	1.10731
CG31915	0.545127	0.608985	-1.15411
CG31917	-0.453345	-0.693034	1.14638
CG31935	-0.00869855	1.00432	-0.995622
CG31937	1.15281	-0.519208	-0.633602
CG31955	-1.04097	0.953249	0.0877225
CG31957	0.550144	0.604136	-1.15428
CG3198	0.695238	0.450806	-1.14604
CG31998	-0.952691	1.0414	-0.0887068
CG31999	0.0487989	0.974707	-1.02351
CG32022	-1.0253	0.0526787	0.972619
CG32039	-0.817298	-0.297763	1.11506
CG32066	-0.600374	-0.554016	1.15439
CG32069	-1.12913	0.773859	0.355267
CG32075	-1.14458	0.440197	0.704385
CG32095	-1.00584	0.0117836	0.994056
CG32099	-0.57735	1.1547	-0.57735
CG32104	-0.832524	-0.276687	1.10921
CG32109	-1.14871	0.472658	0.676056
CG32112	-1.07491	0.172187	0.902726
CG32147	1.03569	-0.075686	-0.960007
CG32152	0.57902	0.575679	-1.1547
CG32163	-0.830228	-0.279898	1.11013
CG32170	-0.974712	1.0235	-0.0487897
CG32176	-1.08299	0.194585	0.888406
CG32195	-0.347536	1.1274	-0.779864
CG32196	-1.11686	0.304518	0.812341
CG32202	-0.86343	-0.232263	1.09569
CG32221	-0.28801	1.1124	-0.82439
CG3223	-0.907997	-0.163785	1.07178
CG3224	-1.05792	0.128202	0.929717
CG32243	-0.323682	1.12175	-0.798067
CG3226	-0.858632	-0.239311	1.09794
CG32262	0.517357	-1.15269	0.635333
CG32264	-0.656061	-0.494884	1.15094
CG32267	-0.978762	-0.0412018	1.01996
CG32276	-0.759095	-0.373999	1.13309
CG32278	-0.727623	-0.412671	1.14029
CG32280	0.484084	-1.14992	0.665838
CG32284	0.131057	0.92801	-1.05907
CG32335	0.953637	0.0870356	-1.04067
CG32344	0.856837	0.241934	-1.09877
CG32365	-0.255685	1.10302	-0.847334
CG32368	-0.680785	1.1481	-0.467319
CG32369	0.228577	0.865923	-1.0945
CG32407	-0.121673	1.05527	-0.933596
CG32409	-1.14551	0.446858	0.698654
CG32425	-0.292667	-0.821013	1.11368
CG32428	-0.980345	-0.0382151	1.01856
CG32441	-0.926051	-0.134321	1.06037
CG32448	-0.449428	1.14586	-0.696433
CG32452	-1.07877	0.896023	0.182747
CG3246	0.13422	0.926112	-1.06033
CG32473	1.03316	-0.0699981	-0.963162
CG32486	0.860221	-1.0972	0.236984
CG32512	-0.221757	-0.870507	1.09226
CG32521	-0.699637	-0.44572	1.14536
CG32533	1.13052	-0.768829	-0.361693
CG32537	1.08677	-0.881313	-0.205459
CG32544	-0.279714	1.11007	-0.830359
CG32549	1.15076	-0.492782	-0.657973
CG32576	-0.889542	1.08237	-0.192832
CG32579	-0.507298	1.15197	-0.644675
CG32590	-0.992211	1.00761	-0.0154006
CG3262	-1.13139	0.365757	0.765629
CG32625	-0.206614	1.08717	-0.880554
CG32638	0.798342	0.323316	-1.12166
CG32640	0.158434	0.911325	-1.06976
CG32641	-1.05186	0.113396	0.938468
CG32687	0.352561	0.775967	-1.12853
CG32706	-0.211372	1.08879	-0.877417
CG32708	-1.15007	0.664535	0.485531
CG32736	-0.6644	-0.485681	1.15008
CG32756	-1.14553	0.447006	0.698527
CG32767	0.19893	0.885583	-1.08451
CG32772	1.14118	-0.418014	-0.723167
CG32795	-0.654719	-0.496356	1.15108
CG32803	-0.891156	1.08149	-0.190332
CG32809	0.821247	0.292345	-1.11359
CG3281	0.0452399	0.976612	-1.02185
CG32813	0.405428	-1.13905	0.73362
CG32815	0.986822	0.0258544	-1.01268
CG32816	0.619608	0.534035	-1.15364
CG32817	0.674472	0.474439	-1.14891
CG32850	0.593575	0.560972	-1.15455
CG32856	-1.13758	0.740363	0.397215
CG3294	-1.15069	0.492124	0.65857
CG3295	0.507829	-1.15201	0.644184
CG33051	-0.239085	-0.858787	1.09787
CG33054	-0.928394	-0.130415	1.05881
CG33056	-1.09558	0.231902	0.863674
CG33057	0.632806	0.520059	-1.15286
CG3308	-0.787503	-0.337603	1.12511
CG3309	1.09897	-0.24256	-0.856408
CG33090	-0.643836	-0.508207	1.15204
CG33095	-0.992014	-0.0157843	1.0078
CG33096	-0.294369	1.11414	-0.819775
CG33107	1.03427	-0.961787	-0.0724816
CG33111	0.891599	0.189643	-1.08124
CG33116	1.03435	-0.0726598	-0.961688
CG33129	-0.370543	-0.761842	1.13238
CG33144	1.14641	-0.453556	-0.69285
CG33155	0.246614	-1.10023	0.85362
CG33158	-0.605832	-0.548392	1.15422
CG33169	-0.265242	1.10588	-0.840639
CG33170	-1.00055	0.00110914	0.999445
CG33181	0.45303	0.693307	-1.14634
CG33199	0.598295	0.556149	-1.15444
CG33217	1.12538	-0.786608	-0.338772
CG33225	-0.962043	-0.0720209	1.03406
CG33226	-0.754135	-0.380204	1.13434
CG33228	-1.01883	0.0387984	0.980036
CG33229	-0.602186	-0.552153	1.15434
CG33230	-0.595345	-0.559167	1.15451
CG3328	0.470529	0.677945	-1.14847
CG33298	1.05965	-0.132509	-0.927139
CG33303	-0.575005	-0.579692	1.1547
CG33332	-0.906953	-0.165456	1.07241
CG3335	-0.426927	-0.715676	1.1426
CG3337	-0.0770936	-0.959222	1.03632
CG3342	1.14646	-0.692474	-0.453988
CG33459	-0.400952	-0.737302	1.13825
CG33460	-0.618047	-0.535674	1.15372
CG33461	-0.573872	-0.580821	1.15469
CG33462	-0.57735	-0.57735	1.1547
CG33465	-0.875825	-0.213777	1.0896
CG33470	1.07067	-0.160849	-0.909826
CG3348	-0.583214	-0.571466	1.15468
CG33494	-1.13834	0.401438	0.736903
CG33506	-1.00013	0.000261256	0.999869
CG33510	-0.628222	-0.524938	1.15316
CG33521	-0.57735	1.1547	-0.57735
CG33523	0.228724	0.865824	-1.09455
CG3356	0.0324832	0.983363	-1.01585
CG3358	-1.03383	0.0714927	0.962335
CG33635	-0.876385	-0.21293	1.08932
CG33671	-0.193839	-0.888889	1.08273
CG33672	0.541025	0.612929	-1.15395
CG3368	-1.12581	0.785197	0.340613
CG33695	0.942293	0.106835	-1.04913
CG33722	0.366179	0.765296	-1.13147
CG3376	-0.127433	-0.930175	1.05761
CG33774	-1.12991	0.35887	0.771043
CG33785	0.507887	-1.15202	0.644131
CG33786	1.14114	-0.417794	-0.723351
CG3386	-0.824863	-0.287354	1.11222
CG33926	-0.635013	1.15271	-0.517699
CG33932	0.486294	-1.15014	0.663847
CG33939	-0.57735	1.1547	-0.57735
CG33941	0.293648	0.820299	-1.11395
CG33964	-1.11446	0.295527	0.818931
CG33969	1.14695	-0.689154	-0.457794
CG33977	-1.12783	0.349424	0.778403
CG33978	0.0838366	0.955443	-1.03928
CG33981	-0.94505	1.04712	-0.102071
CG33995	-0.232422	-0.863322	1.09574
CG34001	-1.10207	0.849508	0.252559
CG34008	-0.57735	1.1547	-0.57735
CG34015	1.11142	-0.826924	-0.284498
CG3402	-0.231322	1.09539	-0.864068
CG34039	-0.988836	-0.0219654	1.0108
CG34054	0.281243	-1.11051	0.829264
CG3407	-0.57735	1.1547	-0.57735
CG3408	-0.601611	-0.552744	1.15436
CG34112	0.78742	0.337712	-1.12513
CG34117	-1.09042	0.216201	0.874215
CG34120	0.74879	0.386845	-1.13563
CG34125	-0.867015	-0.226957	1.09397
CG34126	-1.09062	0.216818	0.873804
CG34132	-0.914286	-0.153644	1.06793
CG34133	-0.742754	-0.394284	1.13704
CG34135	0.215101	0.874946	-1.09005
CG34136	-1.10889	0.275569	0.833321
CG34148	-0.786847	-0.33846	1.12531
CG34150	0.77168	-1.12974	0.358057
CG34159	-0.552733	-0.601623	1.15436
CG34163	-0.929523	-0.128526	1.05805
CG34164	0.835789	0.2721	-1.10789
CG34174	1.10199	-0.25232	-0.849673
CG34179	0.0862962	0.954055	-1.04035
CG34183	0.782653	0.343922	-1.12658
CG34195	0.517818	0.634902	-1.15272
CG3420	-1.1256	0.785894	0.339704
CG34200	-0.128107	1.05788	-0.929773
CG34213	0.0649931	0.965918	-1.03091
CG34228	-0.853958	1.10008	-0.246124
CG34229	-1.11626	0.814006	0.302254
CG34231	0.294833	0.819437	-1.11427
CG34232	0.607829	0.546326	-1.15415
CG34242	-1.15151	0.649992	0.501522
CG34250	-1.09116	0.872722	0.218442
CG34253	-0.438291	1.14431	-0.706017
CG34261	-1.11673	0.812702	0.304027
CG34288	0.233598	-1.09612	0.862524
CG34293	-0.914258	-0.15369	1.06795
CG3430	0.257549	0.846034	-1.10358
CG34310	1.0148	-0.0302806	-0.984516
CG34315	0.769543	0.360784	-1.13033
CG34317	-0.607916	-0.546235	1.15415
CG34331	0.745037	0.391478	-1.13651
CG3434	0.00554403	-1.00276	0.997216
CG34348	0.687664	0.459498	-1.14716
CG3436	-0.274269	-0.834247	1.10852
CG3437	-0.966088	-0.0646827	1.03077
CG34376	-0.428898	-0.714009	1.14291
CG34401	0.999442	-1.00056	0.00111451
CG34404	-0.135408	1.0608	-0.925396
CG34408	-0.967203	1.02985	-0.0626478
CG34417	0.412057	-1.14019	0.728132
CG34423	-1.11103	0.283111	0.827922
CG34436	-0.622187	-0.531321	1.15351
CG34437	0.273971	0.834459	-1.10843
CG34454	-1.09991	0.245577	0.854334
CG3448	-1.01664	0.98249	0.0341449
CG3500	-1.069	0.912552	0.156452
CG3505	1.1288	-0.774997	-0.353807
CG3511	-0.132631	1.0597	-0.927066
CG3527	1.14279	-0.428127	-0.714662
CG3529	-1.03817	0.0813153	0.95686
CG3530	1.15167	-0.503381	-0.648285
CG3534	-0.793391	-0.329871	1.12326
CG3542	-0.913166	-0.155459	1.06863
CG3548	0.976664	0.0451431	-1.02181
CG3552	-0.679396	-0.468891	1.14829
CG3558	-0.159129	1.07002	-0.910894
CG3566	-0.865665	-0.22896	1.09462
CG3568	-1.1494	0.478992	0.670407
CG3587	-1.15465	0.587123	0.567522
CG3589	0.927735	0.131515	-1.05925
CG3594	0.580258	0.574438	-1.1547
CG3603	0.551012	0.603294	-1.15431
CG3609	-1.12916	0.773747	0.355411
CG3618	0.595645	0.558861	-1.15451
CG3625	-0.175807	-0.900438	1.07624
CG3626	-0.174453	1.07575	-0.901295
CG3630	-1.15373	0.617894	0.535835
CG3631	1.15376	-0.536548	-0.617213
CG3632	0.949592	0.0941559	-1.04375
CG3634	0.96946	0.0585105	-1.02797
CG3635	-0.57735	1.1547	-0.57735
CG3638	-0.275837	1.10897	-0.83313
CG3645	-1.09005	0.874935	0.215117
CG3651	-0.980886	-0.0371895	1.01808
CG3652	-0.54615	-0.607998	1.15415
CG3662	-1.12342	0.792889	0.330532
CG3663	-0.740309	1.13759	-0.397281
CG3678	0.853268	0.247124	-1.10039
CG3700	-1.12538	0.338757	0.78662
CG3702	-0.590055	-0.564552	1.15461
CG3704	1.15419	-0.54736	-0.60683
CG3709	1.15018	-0.486708	-0.663473
CG3719	-1.05028	0.109586	0.940693
CG3726	-0.780164	-0.347147	1.12731
CG3732	1.05101	-0.939665	-0.111349
CG3735	-0.917563	1.06587	-0.148309
CG3740	-0.963203	1.03313	-0.0699241
CG3744	-1.122	0.797288	0.324715
CG3756	-1.07571	0.174342	0.901365
CG3760	-1.02668	0.0556766	0.970999
CG3770	-0.549227	-0.605024	1.15425
CG3776	-0.82754	-0.283641	1.11118
CG3781	-0.788817	-0.335883	1.1247
CG3788	-0.980794	-0.0373639	1.01816
CG3792	-0.607958	-0.546192	1.15415
CG3793	-0.281547	1.11059	-0.829045
CG3803	-0.828483	-0.282331	1.11081
CG3808	-1.06371	0.142774	0.920939
CG3815	-0.605362	1.15424	-0.548878
CG3817	-1.03105	0.0652901	0.965755
CG3829	0.539764	0.614138	-1.1539
CG3831	-1.08199	0.890245	0.191743
CG3847	1.04127	-0.0884088	-0.95286
CG3857	-0.759113	1.13309	-0.373975
CG3860	-0.93747	-0.1151	1.05257
CG3862	0.846689	0.25661	-1.1033
CG3894	-1.15327	0.626406	0.526863
CG3902	-0.903929	-0.170277	1.07421
CG3907	-0.973649	-0.0507674	1.02442
CG3909	-0.997849	-0.0042878	1.00214
CG3918	0.871259	-1.09189	0.220633
CG3919	1.09424	-0.227789	-0.866455
CG3939	-0.242578	-0.856395	1.09897
CG3961	0.448148	0.69754	-1.14569
CG3995	-1.14993	0.484182	0.66575
CG40006	0.000498941	0.99975	-1.00025
CG4004	-0.870281	-0.222095	1.09238
CG40045	-0.774756	-0.354117	1.12887
CG40160	0.372979	0.759907	-1.13289
CG40191	-0.307074	1.11753	-0.810454
CG4022	-0.936698	-0.116413	1.05311
CG40228	-0.829569	-0.280817	1.11039
CG4025	0.87955	-1.08769	0.20814
CG4036	-0.705317	-0.439109	1.14443
CG4038	1.0301	-0.0632032	-0.966899
CG4041	-0.32641	1.12242	-0.796009
CG4042	-0.77192	-0.35775	1.12967
CG40439	0.83008	0.280104	-1.11018
CG4045	-0.162125	1.07116	-0.909032
CG40472	0.336836	0.788089	-1.12493
CG4049	-1.09623	0.862298	0.233931
CG4069	-0.316801	1.12003	-0.803227
CG4078	-0.123149	1.05587	-0.932722
CG4080	-0.492588	-0.658149	1.15074
CG4098	0.321158	0.799964	-1.12112
CG4101	-0.619178	-0.534487	1.15366
CG41099	0.0421465	0.97826	-1.02041
CG41128	-0.907793	-0.164112	1.0719
CG4119	1.0462	-0.0999018	-0.946299
CG41378	-1.08648	0.204623	0.881862
CG4186	-1.15365	0.534092	0.619554
CG4199	-1.03329	0.962998	0.0702954
CG42231	-1.02781	0.0581495	0.969656
CG42232	-1.12056	0.318898	0.801659
CG42233	-0.917308	1.06603	-0.148725
CG42237	0.819341	0.294964	-1.11431
CG42238	-0.0466026	1.02249	-0.975884
CG42239	-1.0667	0.916254	0.150444
CG42240	1.12304	-0.328972	-0.794072
CG42245	-0.469679	-0.678698	1.14838
CG42258	-0.789287	-0.335268	1.12455
CG42259	-0.395349	1.13724	-0.741886
CG42271	-0.186025	1.07995	-0.893925
CG4230	-1.15145	0.650744	0.500703
[truncated: 4,793 more rows]

## Sheet: PPO1high
gene	Unwouned_AverageExpression	Wounded_AverageExpression	Wasp inf. 24h_AverageExpression
128up	0.532905	0.620683	-1.15359
14-3-3epsilon	-0.4288	-0.714092	1.14289
14-3-3zeta	-0.259666	-0.844554	1.10422
140up	-0.165057	-0.907202	1.07226
18SrRNA-Psi:CR41602	0.78786	-1.125	0.337136
18SrRNA-Psi:CR45861	1.01027	-0.0208767	-0.989398
18SrRNA:CR41548	0.981581	0.0358717	-1.01745
18SrRNA:CR45838	0.978297	0.0420785	-1.02038
18SrRNA:CR45841	0.988478	0.0226598	-1.01114
26-29-p	-1.07336	0.905361	0.167998
28SrRNA-Psi:CR40596	0.842795	0.262176	-1.10497
28SrRNA-Psi:CR40741	1.11818	-0.309562	-0.808613
28SrRNA-Psi:CR41609	1.11566	-0.30001	-0.815653
28SrRNA-Psi:CR45848	1.06951	-0.157775	-0.911734
28SrRNA-Psi:CR45851	0.87006	0.222425	-1.09248
28SrRNA-Psi:CR45853	1.13585	-0.387987	-0.747866
28SrRNA-Psi:CR45855	0.430536	-1.14316	0.712622
28SrRNA-Psi:CR45859	0.637237	-1.15255	0.515316
28SrRNA-Psi:CR45860	1.10149	-0.250682	-0.850809
28SrRNA-Psi:CR45862	1.15382	-0.537925	-0.615898
28SrRNA:CR45837	1.01908	-0.0393248	-0.979758
28SrRNA:CR45844	0.8661	0.228314	-1.09441
312	-0.447714	-0.697916	1.14563
4E-T	1.11765	-0.307549	-0.810103
5.8SrRNA-Psi:CR45863	0	0	0
a	-1.1537	0.535308	0.618395
A16	1.09565	-0.863523	-0.232125
a6	0.466432	-1.148	0.681568
AANAT1	-0.57735	1.1547	-0.57735
Aasdh	-0.57735	1.1547	-0.57735
Aatf	-0.402869	-0.735727	1.1386
aay	-0.388662	-0.74732	1.13598
ABCA	-0.707236	-0.436865	1.1441
ABCB7	0.976479	0.0454903	-1.02197
ABCD	-0.802147	1.12039	-0.318245
Abi	-0.512363	1.15235	-0.639984
Abl	0.4786	0.670759	-1.14936
abo	0.665635	-1.14995	0.48431
Abp1	-0.473997	1.14886	-0.674865
abs	-1.11239	0.287977	0.824413
Ac76E	-0.57735	-0.57735	1.1547
Ac78C	-0.631228	-0.521741	1.15297
Acbp1	-1.14879	0.473325	0.675462
Acbp2	-0.57735	1.1547	-0.57735
ACC	-0.433652	1.14363	-0.709975
AcCoAS	-0.418029	-0.723154	1.14118
Acer	-0.0636888	1.03032	-0.966633
Acf	0.515046	0.637489	-1.15253
achi	0.617333	-1.15376	0.536422
Ack	1.1291	-0.35514	-0.773958
Ack-like	-0.820273	-0.293684	1.11396
Acn	-0.534192	-0.619459	1.15365
Acox57D-p	-0.252435	1.10203	-0.849594
Acph-1	0.991585	0.016623	-1.00821
Acsl	-0.744503	-0.392134	1.13664
Act42A	-0.471978	-0.67666	1.14864
Act57B	-0.57735	1.1547	-0.57735
Act5C	-0.618881	-0.534798	1.15368
Actn	-1.00993	0.989761	0.0201728
Acyp2	-0.972799	-0.0523458	1.02514
Ada	0.703921	0.440738	-1.14466
Ada2a	-0.57735	-0.57735	1.1547
Ada2b	-0.413188	-0.727192	1.14038
Ada3	0.404275	0.73457	-1.13885
Adar	-0.919494	1.06464	-0.145148
Adck1	-0.57735	1.1547	-0.57735
ADD1	-0.060373	1.02882	-0.968446
AdenoK	0.193503	0.889107	-1.08261
Adf1	-0.62605	-0.52724	1.15329
Adgf-A	1.12359	-0.792342	-0.331253
Adi1	-0.648659	-0.502974	1.15163
AdipoR	1.13299	-0.373502	-0.75949
Adk2	-0.809687	-0.308112	1.1178
Adk3	0.87583	0.213768	-1.0896
adp	1.10978	-0.278665	-0.83111
AdSL	-0.922223	-0.14066	1.06288
AdSS	-1.14767	0.463689	0.683985
Aef1	0.966159	-1.03071	0.0645534
aft	1.12259	-0.327095	-0.795492
Afti	-0.26333	1.10531	-0.841985
AGBE	-0.57735	1.1547	-0.57735
AgmNAT	-1.151	0.495461	0.655535
ago	-0.584364	1.15467	-0.570308
AGO1	-0.871398	-0.220425	1.09182
AGO2	-0.627243	-0.525976	1.15322
AGO3	0.53759	-1.15381	0.616218
Agpat1	-0.57735	1.1547	-0.57735
Agpat3	0.567308	-1.15464	0.587335
agt	0.244304	0.85521	-1.09951
Ahcy	0.931525	0.125166	-1.05669
AhcyL1	1.1438	-0.43479	-0.709005
AIF	-1.05684	0.931307	0.125532
AIMP1	-1.05293	0.936955	0.115976
AIMP2	0.536525	-1.15376	0.617235
AIMP3	-0.261068	-0.843572	1.10464
Ak6	-1.1503	0.662403	0.487893
Akap200	1.14698	-0.458039	-0.68894
akirin	-0.47407	-0.6748	1.14887
Akt1	0.640651	0.511645	-1.1523
Aladin	-0.647951	-0.503744	1.1517
AlaRS	0.771059	0.35885	-1.12991
AlaRS-m	-0.455562	1.14666	-0.691102
Alas	0.217401	-1.09082	0.873416
alc	0.574226	0.580469	-1.15469
Ald1	0.619978	0.533646	-1.15362
Aldh	-1.0157	0.0321751	0.983524
Aldh-III	0.56338	0.591209	-1.15459
Aldh7A1	-0.99158	-0.0166332	1.00821
Alg-2	-0.666182	-0.483702	1.14988
Alg1	1.0919	-0.220668	-0.871236
Alg10	-0.710933	-0.432525	1.14346
Alg11	-0.638319	-0.514155	1.15247
Alg14	-1.15448	0.557633	0.596845
Alg2	-0.897702	1.07782	-0.180116
Alg3	0.769089	0.361362	-1.13045
Alg9	-0.0294842	-0.984932	1.01442
Alh	-0.567775	-0.586873	1.15465
alien	-0.665659	-0.484284	1.14994
ALiX	0.530621	0.622851	-1.15347
AlkB	1.14134	-0.722337	-0.419005
Alp12	-0.57735	1.1547	-0.57735
alph	-0.730133	-0.409646	1.13978
alpha-Cat	-0.478334	-0.670997	1.14933
alpha-Est1	0.538946	0.614921	-1.15387
alpha-Est3	0.438532	-1.14434	0.705811
alpha-Est5	-1.11213	0.825102	0.287023
alpha-Est7	1.0658	-0.148132	-0.917671
alpha-Est8	0.690199	0.456598	-1.1468
alpha-Est9	1.00793	-0.0160587	-0.991874
alpha-Man-Ia	0.811258	0.305986	-1.11724
alpha-Man-Ib	-0.0929979	1.04325	-0.950253
alpha-Man-IIa	-0.57735	1.1547	-0.57735
alpha-Man-IIb	-0.57735	1.1547	-0.57735
alpha-PheRS	-1.07652	0.176547	0.899969
alpha-Spec	1.06983	-0.158619	-0.911211
alpha4GT1	1.01331	-0.0271831	-0.986131
alphaCOP	0.588887	0.565736	-1.15462
alphaSnap	-0.793032	-0.330343	1.12338
alphaTub84B	-0.805575	-0.313652	1.11923
alphaTub84D	-1.14055	0.414171	0.726374
alphaTub85E	-0.646971	1.15178	-0.504808
Alr	1.15401	-0.542515	-0.611498
Als2	1.15468	-0.570713	-0.583962
alt	-0.867721	-0.225909	1.09363
Ama	0.58987	0.56474	-1.15461
Amacr	0.996462	0.00703933	-1.0035
amn	-0.57735	1.1547	-0.57735
AMPdeam	-1.10159	0.850589	0.251
Amph	1.14858	-0.471449	-0.677129
AMPKalpha	-1.13547	0.74946	0.386014
Amun	0.0955129	-1.04433	0.948817
amx	-1.12051	0.318729	0.801785
ana1	-0.57735	1.1547	-0.57735
ana2	-0.929351	-0.128815	1.05817
ana3	-0.541665	-0.612315	1.15398
Ance	0.140728	-1.06291	0.922182
Ance-2	0	0	0
Ance-3	1.00964	-0.0195704	-0.990071
Ance-4	-0.826994	-0.284401	1.11139
Ance-5	0.760535	0.372188	-1.13272
anchor	-1.11462	0.818495	0.296124
angel	-0.500066	-0.651327	1.15139
Ank	-0.0621821	-0.967458	1.02964
Ankle2	-0.339558	1.12556	-0.786006
anne	-1.12595	0.341212	0.784738
anox	0.431924	-1.14337	0.711444
Ant2	-0.389694	1.13618	-0.746484
antr	1.02363	-0.0490569	-0.974569
AnxB10	0.37728	0.756477	-1.13376
AnxB11	0.508019	0.644009	-1.15203
AnxB9	-0.555507	-0.598921	1.15443
aop	-1.11222	0.824848	0.287376
Aos1	-0.567088	-0.587552	1.15464
AOX1	-0.99538	-0.00917596	1.00456
AOX3	0.490014	0.660485	-1.1505
AP-1-2beta	0.853828	0.246312	-1.10014
AP-1gamma	0.465492	0.682398	-1.14789
AP-1mu	0.761534	0.37093	-1.13246
AP-1sigma	0.161493	-1.07092	0.909426
AP-2alpha	0.530701	0.622775	-1.15348
AP-2mu	0.426566	0.71598	-1.14255
AP-2sigma	-1.13216	0.369449	0.762709
Apc	1.0381	-0.0811544	-0.95695
APC10	-0.84521	-0.258728	1.10394
Apc2	-0.57735	1.1547	-0.57735
APC4	-0.57735	-0.57735	1.1547
ApepP	0.116467	0.936667	-1.05313
Apf	-1.08142	0.891278	0.190142
aph-1	-0.659807	-0.490762	1.15057
aPKC	0.557164	0.597304	-1.15447
Apl	1.07515	-0.902316	-0.172837
Apoltp	1.10819	-0.273144	-0.835047
app	-0.858075	-0.240127	1.0982
APP-BP1	1.1492	-0.477143	-0.672061
Aprt	0.388987	0.747057	-1.13604
Aps	-0.607021	-0.547162	1.15418
aqz	-0.368064	-0.763806	1.13187
aralar1	-0.518397	1.15276	-0.634361
Arc1	-0.44594	-0.699447	1.14539
Arc2	-0.609721	-0.544362	1.15408
Arc42	0.705446	-1.1444	0.438958
Archease	1.14308	-0.430008	-0.71307
Arf102F	-0.615611	-0.538225	1.15384
Arf51F	-0.566337	-0.588294	1.15463
Arf79F	-0.638006	-0.514491	1.1525
ArfGAP1	-0.127698	1.05772	-0.930017
ArfGAP3	-0.030564	1.01493	-0.984368
Arfip	-0.0519247	-0.973026	1.02495
Arfrp1	1.13046	-0.361424	-0.76904
arg	0.921518	0.141822	-1.06334
ArgRS	0.355175	0.773932	-1.12911
ArgRS-m	1.07485	-0.902841	-0.172004
ari-1	-1.03623	0.0768936	0.959333
ari-2	1.11853	-0.310944	-0.807588
Arl1	1.15276	-0.634383	-0.518374
Arl2	-1.07038	0.160062	0.910315
Arl4	-0.937173	-0.115606	1.05278
Arl5	1.15044	-0.661066	-0.489371
Arl6IP1	0.0900174	-1.04197	0.951948
Arl8	-0.319491	1.12071	-0.801214
arm	-0.928065	-0.130964	1.05903
armi	-0.594457	-0.560072	1.15453
Arp1	0.695216	0.450832	-1.14605
Arp10	-0.978275	-0.04212	1.02039
Arp2	-1.00312	0.00627792	0.996846
Arp3	-0.96277	-0.070706	1.03348
Arp5	1.14893	-0.474572	-0.674353
Arp6	1.14998	-0.665344	-0.484634
Arp8	0.907271	0.164947	-1.07222
Arpc1	-0.086499	-0.953941	1.04044
Arpc2	-0.675502	-0.473281	1.14878
Arpc3A	-0.89196	-0.189084	1.08104
Arpc3B	-0.821508	-0.291986	1.11349
Arpc4	-0.914962	-0.152546	1.06751
Arpc5	-1.1416	0.420615	0.720988
arr	-0.57735	1.1547	-0.57735
Ars2	-0.805621	-0.313591	1.11921
Art1	1.11226	-0.287515	-0.824747
Art3	1.12322	-0.329707	-0.793515
Art4	-0.57735	1.1547	-0.57735
Art7	-0.876727	-0.212415	1.08914
Art8	-0.987681	-0.0241995	1.01188
Arts	1.07589	-0.174852	-0.901042
aru	-0.889693	-0.192597	1.08229
Arv1	-0.107863	1.04956	-0.941696
arx	-0.929837	-0.127999	1.05784
Asap	0.242387	0.856527	-1.09891
Asator	-1.02498	0.0519841	0.972994
asf1	0.9178	0.147921	-1.06572
ash1	-1.10774	0.271584	0.836156
ash2	-0.955035	1.0396	-0.0845601
Ask1	-0.57735	1.1547	-0.57735
asl	-1.10219	0.849231	0.252958
AsnRS	0.884866	0.20003	-1.0849
AsnRS-m	-0.57735	-0.57735	1.1547
AsnS	0.306324	0.811008	-1.11733
asp	1.14576	-0.448674	-0.697085
AspRS	0.442531	0.702382	-1.14491
AspRS-m	-0.853762	1.10017	-0.246408
asrij	-0.723544	-0.417562	1.14111
asRNA:CR31144	-0.593996	-0.560543	1.15454
asRNA:CR31514	-0.57735	1.1547	-0.57735
asRNA:CR42254	0.489831	-1.15048	0.66065
asRNA:CR42871	-0.57735	1.1547	-0.57735
asRNA:CR43257	-0.620315	-0.533291	1.15361
asRNA:CR43465	-0.57735	1.1547	-0.57735
asRNA:CR43468	-0.452313	-0.69393	1.14624
asRNA:CR43730	1.14973	-0.482138	-0.667588
asRNA:CR43809	1.0489	-0.106294	-0.942607
asRNA:CR43812	-0.57735	1.1547	-0.57735
asRNA:CR43833	0.612054	0.541936	-1.15399
asRNA:CR43868	1.12823	-0.351207	-0.777019
asRNA:CR43875	-0.57735	1.1547	-0.57735
asRNA:CR43906	-0.57735	1.1547	-0.57735
asRNA:CR43916	0.323897	0.797905	-1.1218
asRNA:CR43957	0.855844	0.243382	-1.09923
asRNA:CR43964	0	0	0
asRNA:CR44029	1.14663	-0.691321	-0.455312
asRNA:CR44030	-0.715136	-0.427566	1.1427
asRNA:CR44031	0.802157	0.318233	-1.12039
asRNA:CR44047	-0.843749	-0.260816	1.10456
asRNA:CR44095	-0.658685	1.15068	-0.491998
asRNA:CR44168	-0.57735	1.1547	-0.57735
asRNA:CR44179	-0.57735	1.1547	-0.57735
asRNA:CR44266	1.04102	-0.0878334	-0.953186
asRNA:CR44291	-0.57735	1.1547	-0.57735
asRNA:CR44386	0.517676	0.635035	-1.15271
asRNA:CR44429	-0.57735	1.1547	-0.57735
asRNA:CR44431	-1.07664	0.899762	0.176873
asRNA:CR44872	-0.57735	1.1547	-0.57735
asRNA:CR44962	-0.57735	1.1547	-0.57735
asRNA:CR44969	0.622144	0.531366	-1.15351
asRNA:CR44976	-1.03862	0.0823244	0.956293
asRNA:CR44987	-0.726949	-0.413481	1.14043
asRNA:CR45028	-0.57735	1.1547	-0.57735
asRNA:CR45044	-0.57735	1.1547	-0.57735
asRNA:CR45053	-0.57735	1.1547	-0.57735
asRNA:CR45139	0.423948	0.718188	-1.14214
asRNA:CR45140	-0.47364	-0.675183	1.14882
asRNA:CR45141	0	0	0
asRNA:CR45142	1.14362	-0.433588	-0.710029
asRNA:CR45160	-0.193403	1.08257	-0.889172
asRNA:CR45164	-0.567399	-0.587245	1.15464
asRNA:CR45175	0.968956	-1.02839	0.0594367
asRNA:CR45190	-0.57735	-0.57735	1.1547
asRNA:CR45195	1.15115	-0.653908	-0.497245
asRNA:CR45214	-0.57735	1.1547	-0.57735
asRNA:CR45264	0.707021	0.437116	-1.14414
asRNA:CR45275	0	0	0
asRNA:CR45350	0.852167	0.248719	-1.10089
asRNA:CR45367	0.424098	0.718061	-1.14216
asRNA:CR45396	-0.57735	-0.57735	1.1547
asRNA:CR45604	-0.378155	1.13393	-0.755776
asRNA:CR45778	-0.0281572	1.01378	-0.985624
asRNA:CR45798	0.538279	0.61556	-1.15384
asRNA:CR45806	0.983647	0.0319414	-1.01559
asRNA:CR45818	1.13374	-0.377176	-0.756559
asRNA:CR45822	-0.57735	-0.57735	1.1547
asRNA:CR45865	0	0	0
asRNA:CR45874	0.507887	-1.15202	0.644131
asRNA:CR45907	-0.57735	1.1547	-0.57735
asRNA:CR45925	-1.01695	0.0348055	0.982143
asRNA:CR45926	1.098	-0.239481	-0.858517
asRNA:CR45928	-0.57735	1.1547	-0.57735
asRNA:CR45999	-0.57735	1.1547	-0.57735
asRNA:CR46067	1.06655	-0.150059	-0.91649
asRNA:CR46089	0.854041	0.246002	-1.10004
asRNA:CR46093	-0.651223	-0.500179	1.1514
asRNA:CR46104	0.88067	0.206438	-1.08711
asRNA:CR46133	0.520312	0.632568	-1.15288
asRNA:CR46135	0.844265	0.260079	-1.10434
ast	-1.15442	0.599116	0.555308
asun	-0.57735	1.1547	-0.57735
Asx	1.10765	-0.271268	-0.83638
Atac2	-1.00982	0.0199426	0.98988
Atac3	-0.305356	-0.811722	1.11708
ATbp	-0.57735	1.1547	-0.57735
Ate1	-1.12914	0.355307	0.773828
Atet	1.02983	-0.967227	-0.0626041
Atf-2	-1.03089	0.0649533	0.96594
Atf3	-1.08122	0.189572	0.891645
Atf6	-1.09629	0.234109	0.862177
Atg1	-0.0672125	1.03191	-0.964698
Atg101	-1.13997	0.410772	0.7292
Atg12	-1.06366	0.921027	0.14263
Atg13	0.59996	0.554441	-1.1544
Atg14	1.0019	-0.00381272	-0.998088
Atg16	-0.15607	-0.912789	1.06886
Atg17	-1.05405	0.118687	0.93536
Atg18a	0.584019	0.570655	-1.15467
Atg18b	1.15466	-0.586186	-0.568469
Atg2	0.697261	0.44847	-1.14573
Atg3	-0.966507	-0.0639191	1.03043
Atg4a	-1.00775	0.992065	0.0156849
Atg4b	-0.498951	-0.652348	1.1513
Atg5	0.934754	0.119713	-1.05447
Atg6	0.852767	0.247851	-1.10062
Atg7	-0.57735	1.1547	-0.57735
Atg8a	-0.552955	-0.601406	1.15436
Atg9	-0.965249	1.03146	-0.0662108
atilla	-0.981424	-0.0361711	1.01759
atl	-0.835123	-0.273038	1.10816
atms	1.15164	-0.503099	-0.648544
Atox1	0.394361	0.742692	-1.13705
ATP6AP2	0.758471	0.374781	-1.13325
ATP7	-0.57735	1.1547	-0.57735
ATP8A	-0.51309	-0.639309	1.1524
ATP8B	-1.14823	0.679835	0.468395
Atpalpha	-0.332424	-0.791452	1.12388
ATPCL	1.071	-0.161705	-0.909293
ATPsynB	0.641012	0.511256	-1.15227
ATPsynbeta	0.461283	0.686099	-1.14738
ATPsynC	-0.594679	-0.559846	1.15453
ATPsynCF6	0.377921	0.755964	-1.13388
ATPsynD	0.440409	0.704204	-1.14461
ATPsyndelta	0.156651	0.912429	-1.06908
ATPsynE	-1.00668	0.01349	0.993187
ATPsynF	-0.901246	-0.174531	1.07578
ATPsynG	0.504196	0.647535	-1.15173
ATPsyngamma	0.539837	0.614068	-1.1539
ATPsynO	0.102611	0.944738	-1.04735
AttB	-0.851652	-0.249464	1.10112
Atu	0.77189	0.357789	-1.12968
Atx2	-1.15438	0.600733	0.553648
Atxn7	-0.579135	-0.575564	1.1547
aurA	1.14218	-0.424232	-0.717949
aurB	-0.390205	1.13627	-0.74607
aux	0.762995	0.369089	-1.13208
ave	-0.966353	-0.0642	1.03055
Aven	1.11402	-0.293906	-0.820112
awd	-0.866144	-0.228249	1.09439
axed	-0.57735	1.1547	-0.57735
Axn	-0.666427	1.14986	-0.48343
Axs	0.717566	-1.14225	0.424686
Axud1	-0.678203	-0.470238	1.14844
B4	-0.473061	-0.675697	1.14876
B52	0.680975	-1.14808	0.467105
babo	-0.61008	-0.543989	1.15407
Bacc	-0.139868	-0.922703	1.06257
baf	-0.64667	-0.505135	1.15181
bai	-1.05673	0.125251	0.931474
Baldspot	0.171902	-1.07481	0.902905
ball	-1.05668	0.931534	0.125151
bam	-0.57735	1.1547	-0.57735
Bap111	0.68326	0.464513	-1.14777
Bap170	-0.57735	1.1547	-0.57735
Bap55	-0.727977	-0.412244	1.14022
Bap60	-0.901823	-0.173618	1.07544
barc	-0.782781	-0.343756	1.12654
barr	0.363019	0.767787	-1.13081
baz	-0.900215	1.07637	-0.176159
bbc	-0.195467	-0.887835	1.0833
bbg	-0.922429	1.06275	-0.14032
bbx	1.12119	-0.321438	-0.799754
bc10	0.90497	-1.07359	0.168621
BCAS2	0.646185	0.505662	-1.15185
bchs	1.06163	-0.137497	-0.924137
BCL7-like	-0.990703	1.00904	-0.018342
bcn92	0.0680794	-1.0323	0.964221
Bdbt	-0.922479	-0.140237	1.06272
bdg	-0.427808	-0.714931	1.14274
Bdp1	-0.599671	-0.554738	1.15441
be	0.751865	0.38303	-1.1349
BEAF-32	-1.04309	0.950469	0.0926175
beag	-0.535849	-0.61788	1.15373
beg	-0.900397	-0.175871	1.07627
bel	-0.765718	1.13136	-0.365644
Bem46	-0.463604	1.14766	-0.68406
ben	-1.15354	0.621634	0.531904
Best1	-0.823351	-0.289444	1.1128
Bet1	0.930117	-1.05765	0.12753
Bet3	-0.23645	1.09703	-0.860585
Bet5	-0.37553	1.1334	-0.757874
beta-Man	0.530082	0.623362	-1.15344
beta-PheRS	-0.685719	1.14744	-0.461716
beta-Spec	-1.15071	0.492306	0.658406
beta'COP	-0.990694	-0.01836	1.00905
beta3GalTII	-0.57735	1.1547	-0.57735
beta4GalNAcTA	0.841152	0.264513	-1.10567
beta4GalNAcTB	-1.06921	0.912221	0.156988
beta4GalT7	-1.0408	0.0873211	0.953476
betaCOP	0.0955369	-1.04434	0.948803
betaggt-I	-0.460922	-0.686416	1.14734
betaggt-II	0.760144	0.37268	-1.13282
betaGlu	-0.861539	-0.235047	1.09659
betaTub56D	-0.595268	-0.559246	1.15451
betaTub60D	-0.746018	1.13629	-0.390269
betaTub97EF	0.582101	-1.15469	0.572586
Bgb	-0.621032	1.15357	-0.532538
bgm	0	0	0
BHD	1.15468	-0.571804	-0.582879
BI-1	-0.450509	-0.695496	1.146
bic	-0.643086	-0.509018	1.1521
BicD	0.717468	-1.14227	0.424803
bif	-0.0831132	-0.95585	1.03896
bigmax	0.870366	0.221968	-1.09233
Bin1	-0.812789	-0.303909	1.1167
bin3	-0.774095	-0.354966	1.12906
bip2	-0.314803	-0.804718	1.11952
Bka	1.0462	-0.9463	-0.0999008
Blm	-1.03667	0.0778883	0.958778
Blos1	1.12579	-0.785274	-0.340512
Blos2	-0.963095	1.03321	-0.0701184
Blos3	-1.07934	0.184333	0.89501
Blos4	1.1547	-0.57735	-0.57735
blow	0.938971	0.112537	-1.05151
blp	-0.328079	-0.794748	1.12283
blw	-0.747634	-0.388273	1.13591
Bmcp	0.745462	0.390954	-1.13642
bmm	-1.04917	0.106936	0.942235
bnl	-0.749909	-0.385459	1.13537
boca	1.15166	-0.648358	-0.503302
bocks	0.987182	0.0251619	-1.01234
BOD1	-0.097761	1.04529	-0.947529
bol	1.15029	-0.662474	-0.487815
bon	-0.775483	1.12867	-0.353184
bonsai	-1.02854	0.0597503	0.968785
bor	0.0610392	-1.02912	0.968082
BORCS5	-1.06025	0.134026	0.926228
BORCS6	-0.57735	1.1547	-0.57735
borr	-0.968035	1.02916	-0.0611265
botv	1.10019	-0.246486	-0.853708
bowl	-0.619607	-0.534037	1.15364
br	0.424369	0.717834	-1.1422
Br140	-0.0178003	1.00878	-0.990981
brat	-0.884223	-0.201015	1.08524
Brd8	1.01125	-0.0228859	-0.988361
Bre1	-0.57735	1.1547	-0.57735
Brf	1.15458	-0.562969	-0.591613
brk	-1.15016	0.663701	0.486456
brm	-0.693762	1.14627	-0.452507
Brms1	0.509337	0.64279	-1.15213
brn	-0.57735	1.1547	-0.57735
bru2	0.403668	0.73507	-1.13874
bru3	1.02632	-0.0549049	-0.971416
Bruce	0.694399	0.451773	-1.14617
brun	-0.57735	1.1547	-0.57735
BRWD3	0.320575	0.800401	-1.12098
brwl	-0.652716	-0.498549	1.15126
bs	-0.61148	-0.542535	1.15401
bsf	-0.489599	-0.66086	1.15046
Bsg	1.11471	-0.296468	-0.818244
Bsg25D	-0.182782	-0.896001	1.07878
bsk	1.09862	-0.241441	-0.857175
bt	0.346327	0.780798	-1.12713
BTBD9	1.00305	-0.00613728	-0.996917
BtbVII	0.49944	0.6519	-1.15134
BthD	-0.809547	-0.3083	1.11785
Btk29A	0.820778	0.292991	-1.11377
btsz	1.07383	-0.169275	-0.904559
btz	1.13079	-0.767856	-0.36293
Bub1	-0.116016	1.05295	-0.936932
Bub3	0.588274	-1.15463	0.566358
BubR1	-0.258338	1.10382	-0.845482
bug	-0.797388	-0.324583	1.12197
Bug22	1.08931	-0.212905	-0.876402
BuGZ	0.672206	0.47698	-1.14919
bun	-0.395147	-0.742051	1.1372
bur	-0.422043	-0.71979	1.14183
bves	0.875451	-1.08979	0.21434
Bx42	-0.651797	-0.499554	1.15135
by	0.9876	0.0243542	-1.01195
bys	0.0943179	-1.04382	0.9495
c(3)G	-0.57735	1.1547	-0.57735
c11.1	-0.34115	-0.784785	1.12593
c12.1	-0.102611	-0.944738	1.04735
c12.2	-0.57735	1.1547	-0.57735
C1GalTA	0.99156	0.0166725	-1.00823
C3G	1.15374	-0.617547	-0.536197
ca	0.975137	0.0479982	-1.02313
CaBP1	1.15167	-0.648212	-0.50346
cact	-0.538764	-0.615095	1.15386
cactin	-0.0950514	1.04413	-0.94908
Cad86C	0	0	0
Cad87A	-0.57735	1.1547	-0.57735
Caf1-105	-0.948015	1.04493	-0.0969131
Caf1-180	0.962279	-1.03387	0.071594
Caf1-55	0.271203	0.836426	-1.10763
cag	-0.519956	-0.632902	1.15286
CAH2	0.750766	0.384395	-1.13516
CAH3	-0.559071	-0.595438	1.15451
cal1	-0.57735	-0.57735	1.1547
CalpA	-0.243649	-0.85566	1.09931
CalpB	-1.12787	0.34963	0.778243
CalpC	-0.540369	-0.613558	1.15393
Calr	0.47204	0.676605	-1.14864
Cals	1.15464	-0.567107	-0.587533
calypso	-0.57735	1.1547	-0.57735
Cam	-0.348878	-0.778825	1.1277
CaMKI	-0.522916	-0.630125	1.15304
CaMKII	-0.419606	-0.721834	1.14144
Camp	-0.411979	-0.728198	1.14018
Camta	-0.351204	1.12823	-0.777021
CanA-14F	0.93328	0.122208	-1.05549
CanB2	-0.712817	1.14312	-0.430305
Cand1	1.04535	-0.947446	-0.0979053
CAP	-0.552534	-0.601816	1.15435
Cap-D2	1.14548	-0.44659	-0.698886
Cap-D3	-0.57735	1.1547	-0.57735
Cap-G	-0.57735	1.1547	-0.57735
Cap-H2	0.971341	0.0550447	-1.02639
Caper	0.503394	-1.15167	0.648273
Capr	0.855472	-1.09939	0.243923
caps	1.1547	-0.57735	-0.57735
capt	-1.06435	0.919946	0.144406
capu	-0.367035	-0.76462	1.13165
car	0.940848	0.109321	-1.05017
CASK	-0.57735	1.1547	-0.57735
casp	-0.974745	-0.0487289	1.02347
cass	0.334795	0.789647	-1.12444
Cat	-1.1547	0.575202	0.579496
cathD	0.5366	-1.15376	0.617163
Catsup	-1.00106	0.00212376	0.998936
cav	-0.807708	-0.310783	1.11849
caz	0.893723	0.186341	-1.08006
cbc	-0.900862	1.076	-0.175137
Cbl	-0.923641	1.06196	-0.138318
CBP	0.797972	-1.12178	0.323807
Cbp20	0.126321	-1.05716	0.930838
Cbp80	-0.924234	1.06157	-0.137336
cbs	0.997133	0.00570941	-1.00284
Cbs	1.13946	-0.407791	-0.731668
cbt	0.854797	0.244905	-1.0997
Cby	0.724571	-1.1409	0.416334
CCDC53	-1.04103	0.087847	0.953178
Ccdc56	-0.766833	-0.36423	1.13106
Ccdc58	-0.962202	-0.0717331	1.03394
Cchl	-0.699117	1.14544	-0.446322
Ccm3	-0.733392	-0.405705	1.1391
Ccs	0.190062	0.89133	-1.08139
CCT1	0.34362	0.782885	-1.12651
CCT2	0.197895	-1.08415	0.886257
CCT3	0.215876	0.874431	-1.09031
CCT4	-0.632982	-0.51987	1.15285
CCT5	0.623744	0.529679	-1.15342
CCT6	0.66325	0.486956	-1.15021
CCT7	0.455129	0.691481	-1.14661
CCT8	-0.174315	-0.901382	1.0757
Ccz1	0.261187	0.843489	-1.10468
CD98hc	-0.256564	-0.846721	1.10329
CDase	1.11919	-0.313515	-0.805678
cdc14	-0.933097	-0.122517	1.05561
Cdc16	0.971573	0.0546161	-1.02619
Cdc23	1.15432	-0.602685	-0.551639
Cdc27	-0.166837	-0.906088	1.07293
Cdc2rk	0.416793	0.724187	-1.14098
Cdc37	-0.147722	-0.917922	1.06564
Cdc42	0.876982	0.212029	-1.08901
CDC45L	-1.10653	0.839089	0.267439
Cdc5	-1.11145	0.284609	0.826844
CDC50	1.14928	-0.671399	-0.477884
Cdc6	-0.57735	1.1547	-0.57735
Cdc7	0.16036	0.91013	-1.07049
Cdep	-1.15461	0.589701	0.564911
CdGAPr	-0.57735	1.1547	-0.57735
cdi	0.0743956	0.960725	-1.03512
Cdk1	-1.02527	0.972647	0.0526277
Cdk12	-0.875684	-0.213988	1.08967
Cdk2	-0.271421	-0.836271	1.10769
CDK2AP1	-0.57735	1.1547	-0.57735
Cdk4	-0.986432	1.01304	-0.0266056
Cdk5	-0.986804	-0.025889	1.01269
Cdk7	1.04076	-0.087242	-0.953521
Cdk9	0.180994	0.897142	-1.07814
cdm	-0.185186	1.07965	-0.894463
Cds	0.091302	0.951218	-1.04252
CecA1	-0.57735	-0.57735	1.1547
CecA2	-0.57735	-0.57735	1.1547
CecB	-0.57735	-0.57735	1.1547
CecC	-0.683812	-0.463886	1.1477
Ced-12	0.496844	-1.15112	0.654274
ced-6	-0.558438	-0.596058	1.1545
Cen	0.734244	0.404671	-1.13891
CenB1A	-0.443271	-0.701746	1.14502
CenG1A	1.1545	-0.558526	-0.595972
Cenp-C	-0.611476	-0.542539	1.15401
Cep135	0.978957	0.0408359	-1.01979
cer	-1.10683	0.838366	0.268463
Cerk	1.11483	-0.817925	-0.296905
cert	-0.497972	-0.653243	1.15122
cerv	0.905596	-1.07322	0.167623
Cf2	-0.875254	-0.214636	1.08989
Cfp1	-0.640704	-0.511588	1.15229
cg	0.360885	-1.13035	0.769463
CG10011	0.196797	0.886971	-1.08377
CG10026	1.13683	-0.39316	-0.743669
CG10038	-1.14829	0.679354	0.468939
CG10050	0.167461	0.905697	-1.07316
CG10053	-0.918017	-0.147567	1.06558
CG10055	-0.0362671	1.01764	-0.981373
CG10068	-0.135958	1.06102	-0.925065
CG10075	-0.322467	-0.798981	1.12145
CG10077	-1.15462	0.589141	0.565479
CG10082	0.0407598	-1.01976	0.978997
CG10098	-0.859476	-0.238076	1.09755
CG10103	-0.310834	-0.80767	1.1185
CG10126	-1.08079	0.892411	0.188382
CG10139	-0.924029	-0.137675	1.0617
CG10165	0.0976039	-1.04522	0.947619
CG10166	-1.08044	0.187386	0.893052
CG10171	1.02353	-0.0488584	-0.974675
CG10188	-0.57735	1.1547	-0.57735
CG10189	-0.76747	-0.363421	1.13089
CG10194	-0.71405	-0.42885	1.1429
CG10195	-0.896473	-0.182043	1.07852
CG10208	-0.349297	1.1278	-0.778501
CG10209	-0.913867	1.06819	-0.154323
CG10214	-1.15448	0.596633	0.55785
CG10222	1.1547	-0.57735	-0.57735
CG1024	-0.57735	1.1547	-0.57735
CG10254	1.14146	-0.721711	-0.419753
CG10265	-0.731546	-0.407939	1.13948
CG10268	-0.135447	1.06082	-0.925373
CG10274	-0.0152928	1.00756	-0.992266
CG10286	0.00410204	-1.00204	0.997943
CG10321	1.14195	-0.719161	-0.422791
CG10324	-0.404641	-0.734269	1.13891
CG10333	0.695909	-1.14594	0.450032
CG10336	-1.04923	0.107085	0.942148
CG10337	1.11341	-0.29169	-0.821723
CG10338	0.181079	0.897088	-1.07817
CG10340	-0.947015	-0.0986563	1.04567
CG10341	0.574082	0.580613	-1.15469
CG10343	-0.122597	-0.93305	1.05565
CG10347	-0.466463	1.148	-0.681541
CG10353	-0.850678	-0.250872	1.10155
CG10365	0.792599	0.330914	-1.12351
CG10366	1.15429	-0.60383	-0.550459
CG10375	-1.07433	0.903719	0.170611
CG10376	-0.563507	-0.591083	1.15459
CG10383	0.269655	0.837522	-1.10718
CG10395	-0.859323	-0.2383	1.09762
CG10407	0.961109	0.0737041	-1.03481
CG10413	0.672912	0.476189	-1.1491
CG10417	-1.12739	0.347481	0.779907
CG10418	-0.738827	-0.399092	1.13792
CG10425	-0.371045	-0.761444	1.13249
CG10428	1.12222	-0.325576	-0.796639
CG10431	0.512877	0.639507	-1.15238
CG10433	-0.57735	1.1547	-0.57735
CG10435	0.120643	0.934205	-1.05485
CG10444	-1.13973	0.730355	0.409378
CG10445	0	0	0
CG10462	0.947236	-1.04551	0.098272
CG10463	0.908992	-1.07118	0.162189
CG10465	-0.994393	-0.0111205	1.00551
CG10466	-0.57735	1.1547	-0.57735
CG10467	-0.286715	1.11204	-0.825325
CG10469	0.754947	0.379191	-1.13414
CG10470	-1.02645	0.0551909	0.971262
CG10492	-0.57735	1.1547	-0.57735
CG10494	-0.57735	1.1547	-0.57735
CG10495	-1.12642	0.783179	0.343239
CG10508	0.865661	0.228965	-1.09463
CG10512	0.0109568	-1.00543	0.994477
CG10516	0.68532	0.46217	-1.14749
CG10527	-0.413169	-0.727208	1.14038
CG10543	-0.305207	-0.811832	1.11704
CG10555	1.14478	-0.441575	-0.703203
CG10561	0.689821	0.457031	-1.14685
CG10565	1.09347	-0.225421	-0.868049
CG10576	-0.607708	-0.546451	1.15416
CG10581	-0.57735	1.1547	-0.57735
CG10584	0	0	0
CG10600	0.890313	-1.08195	0.191638
CG10602	-0.330911	-0.792601	1.12351
CG10616	-0.0591329	-0.969121	1.02825
CG10621	-0.432379	-0.711057	1.14344
CG10623	0.698584	0.44694	-1.14552
CG10628	-0.917886	-0.147782	1.06567
CG10631	1.04063	-0.0869416	-0.953691
CG10638	0.251724	0.850087	-1.10181
CG10646	-0.57735	1.1547	-0.57735
CG10654	-0.57735	1.1547	-0.57735
CG10660	0.957573	-1.03762	0.0800435
CG10672	0.814382	0.301742	-1.11612
CG10674	-1.14666	0.691131	0.455529
CG10681	-0.57735	1.1547	-0.57735
CG10731	0.992494	0.0148476	-1.00734
CG10737	-0.869089	-0.223872	1.09296
CG1074	0.930286	0.127247	-1.05753
CG10747	-0.120822	1.05492	-0.9341
CG10764	0.229097	0.865572	-1.09467
CG10778	0.200194	0.884759	-1.08495
CG10795	0.795535	-1.12257	0.327039
CG10802	1.15148	-0.650395	-0.501083
CG10803	-1.06106	0.925008	0.136052
CG10809	-1.04098	0.95324	0.0877373
CG10859	0.366557	0.764997	-1.13155
CG10863	-0.759487	-0.373506	1.13299
CG10874	0.64169	-1.15221	0.510525
CG10877	0.849563	0.252479	-1.10204
CG10889	1.12637	-0.343019	-0.783349
CG10898	1.1547	-0.57735	-0.57735
CG10903	-0.4523	-0.693941	1.14624
CG10904	-0.840275	-0.265759	1.10603
CG10907	0.31571	0.804042	-1.11975
CG10914	-0.57735	1.1547	-0.57735
CG10916	-1.08628	0.882252	0.204029
CG1092	0.103378	0.944295	-1.04767
CG10927	0.996927	-1.00304	0.00611806
CG10932	0.975694	0.0469576	-1.02265
CG10939	-0.57735	1.1547	-0.57735
CG10948	-0.407769	-0.731686	1.13946
CG10960	-0.900678	-0.175428	1.07611
CG10962	-0.57735	1.1547	-0.57735
CG10973	-0.830015	-0.280195	1.11021
CG10979	-1.04327	0.0930373	0.95023
CG10984	-0.71945	1.1419	-0.422448
CG11007	-0.680844	1.1481	-0.467253
CG1103	1.12573	-0.340273	-0.785458
CG11030	-0.943701	-0.104405	1.04811
CG11034	0	0	0
CG11035	-0.0520445	-0.972961	1.02501
CG1105	1.15381	-0.537606	-0.616203
CG11050	-0.233488	-0.862599	1.09609
CG11070	-0.250972	1.10158	-0.850608
CG11076	-0.775692	-0.352914	1.12861
CG11077	-0.76485	-0.366744	1.13159
CG11089	-1.09769	0.238517	0.859175
CG11095	-0.318585	-0.801893	1.12048
CG11103	0.614003	-1.15391	0.539905
CG11109	-1.10459	0.260917	0.843678
CG11110	1.14685	-0.457023	-0.689828
CG11122	0.886535	0.197468	-1.084
CG11123	-0.290962	-0.822251	1.11321
CG11127	-0.841458	1.10554	-0.264079
CG11134	-0.98624	-0.0269743	1.01321
CG11137	-0.913446	-0.155006	1.06845
CG11141	0.302236	0.814019	-1.11626
CG11151	-0.565969	1.15463	-0.588657
CG11158	-0.843031	1.10487	-0.26184
CG1116	-1.151	0.655466	0.495537
CG11164	0	0	0
CG11168	0.810496	0.307018	-1.11751
CG11170	0.777263	0.350893	-1.12816
CG11178	-0.0696417	-0.963359	1.033
CG11180	-0.644245	-0.507764	1.15201
CG11200	1.1099	-0.279099	-0.8308
CG11236	-0.57735	-0.57735	1.1547
CG11241	1.14807	-0.467	-0.681067
CG11247	-0.762639	-0.369537	1.13218
CG11248	0.364927	-1.13121	0.766284
CG11267	-1.03627	0.0769799	0.959285
CG11279	-1.06916	0.156872	0.912292
CG1129	-0.70318	-0.441602	1.14478
CG11309	0.138773	0.923365	-1.06214
CG11318	0.868709	0.224439	-1.09315
CG11334	-1.15132	0.499193	0.652127
CG11342	-1.15342	0.623723	0.529701
CG11357	-0.895437	-0.183664	1.0791
CG11360	-0.384812	1.13524	-0.75043
CG11377	-0.540265	1.15392	-0.613658
CG11396	-0.633242	-0.519593	1.15283
CG11399	-0.57735	1.1547	-0.57735
CG11403	-0.57735	1.1547	-0.57735
CG11414	-0.234467	1.0964	-0.861934
CG11417	-0.67483	-0.474037	1.14887
CG1142	-1.0662	0.149167	0.917037
CG11436	-0.57735	1.1547	-0.57735
CG11444	-0.77453	-0.354407	1.12894
CG11447	-0.0104016	1.00516	-0.994759
CG11454	-1.02858	0.0598387	0.968737
CG11456	-0.906032	-0.166927	1.07296
CG1146	1.1547	-0.57735	-0.57735
CG11474	-0.152764	1.06759	-0.914828
CG11486	0.70111	-1.14512	0.44401
CG11504	-0.923567	1.06201	-0.13844
CG11523	-1.01248	0.987029	0.025456
CG11537	-0.437617	-0.706593	1.14421
CG11539	-0.823209	-0.28964	1.11285
CG11555	-1.03514	0.960704	0.0744331
CG11560	1.15286	-0.520015	-0.632847
CG11562	0.335709	0.78895	-1.12466
CG11563	-0.574846	-0.579851	1.1547
CG11583	-0.580538	-0.574157	1.15469
CG11586	0.0718401	0.962143	-1.03398
CG11590	0.298002	0.817123	-1.11513
CG11593	-1.02303	0.0477633	0.975262
CG11596	0.294975	-1.11431	0.819333
CG11601	-1.10671	0.26805	0.838658
CG1161	1.12266	-0.795259	-0.327403
CG11655	0.989856	0.0199882	-1.00984
CG11679	-0.76192	-0.370444	1.13236
CG11686	-0.650042	-0.501468	1.15151
CG11695	-0.681927	-0.466026	1.14795
CG11696	-0.702321	-0.442602	1.14492
CG11699	0.0237515	-1.01166	0.987913
CG11710	0.635302	-1.15269	0.51739
CG1172	-0.778806	-0.348903	1.12771
CG11722	-0.77777	-0.350239	1.12801
CG11723	0.57505	0.579648	-1.1547
CG11737	-0.57735	1.1547	-0.57735
CG11752	-0.83101	-0.278805	1.10982
CG11753	-0.853333	-0.24703	1.10036
CG11755	1.15276	-0.518377	-0.63438
CG11768	0.931286	0.125568	-1.05685
CG11771	0.917847	0.147845	-1.06569
CG11777	-0.861138	1.09678	-0.235638
CG11779	-0.882446	1.08618	-0.203732
CG11781	-0.900404	1.07626	-0.17586
CG11790	-0.996168	-0.0076195	1.00379
CG11791	-0.838776	-0.267883	1.10666
CG11807	1.13414	-0.379186	-0.754951
CG11808	-0.604603	-0.549662	1.15426
CG11811	-1.1355	0.38617	0.749334
CG11837	-0.796762	-0.325412	1.12217
CG11839	-0.57735	-0.57735	1.1547
CG11857	-0.719541	-0.422339	1.14188
CG11858	-0.196699	-0.887035	1.08373
CG11873	-0.313569	-0.805637	1.11921
CG11882	-0.649693	-0.501848	1.15154
CG11885	-1.15466	0.586086	0.56857
CG11899	0.573118	0.581572	-1.15469
CG11902	-0.913617	-0.154728	1.06835
CG11906	1.08719	-0.880506	-0.206687
CG11920	-0.781444	-0.345491	1.12693
CG11927	1.14428	-0.438099	-0.706181
CG11961	-0.083432	1.0391	-0.95567
CG11964	0.961149	-1.03478	0.0736321
CG11970	-0.825791	1.11186	-0.28607
CG11975	-0.984443	-0.0304202	1.01486
CG11980	0.0902151	-1.04205	0.951836
CG11986	-0.57735	1.1547	-0.57735
CG11999	-0.36068	1.1303	-0.769624
CG12004	-0.512173	-0.64016	1.15233
CG12007	-1.00017	0.000341021	0.999829
CG12012	-0.778828	-0.348874	1.1277
CG12016	-0.57735	1.1547	-0.57735
CG12024	-0.757949	-0.375436	1.13338
CG12025	-0.634711	1.15273	-0.518023
CG12054	1.01071	-0.0217765	-0.988934
CG12056	-0.57735	1.1547	-0.57735
CG12065	0.85301	0.247498	-1.10051
CG12071	-0.57735	-0.57735	1.1547
CG12081	1.11986	-0.316134	-0.803725
CG12084	-0.997266	-0.0054449	1.00271
CG12091	0.0355284	-1.01729	0.981762
CG12093	-1.08915	0.212442	0.876709
CG12096	1.12495	-0.788011	-0.336938
CG12099	0.531798	0.621734	-1.15353
CG12104	0.118173	-1.05384	0.935663
CG12106	-0.740026	-0.397627	1.13765
CG12107	-0.804242	-0.315441	1.11968
CG12112	-0.600848	-0.553529	1.15438
CG12118	0.684248	0.463391	-1.14764
CG12121	-0.441893	-0.70293	1.14482
CG12123	1.02498	-0.0519778	-0.972997
CG12128	1.08066	-0.188011	-0.89265
CG12129	0.100645	-1.04652	0.945872
CG12133	0	0	0
CG12134	-1.08439	0.198573	0.885816
CG12155	-1.00428	0.99566	0.008624
CG12159	0.565408	-1.15462	0.589211
CG12163	-1.15392	0.613752	0.540167
CG12170	-0.185933	-0.893984	1.07992
CG12171	0.22567	0.867881	-1.09355
CG12173	-0.894097	-0.185757	1.07985
CG12177	-0.0577741	-0.96986	1.02763
CG12179	-0.57735	1.1547	-0.57735
CG1218	1.08684	-0.20566	-0.881181
CG12204	-0.57735	1.1547	-0.57735
CG12213	0.262896	-1.10519	0.842289
CG12219	-1.04866	0.105726	0.942937
CG12224	-0.57735	-0.57735	1.1547
CG12236	-0.123352	1.05595	-0.932602
CG12237	0.664752	0.485291	-1.15004
CG12241	-0.78719	-0.338012	1.1252
CG12259	-0.606649	-0.547547	1.1542
CG12267	-0.57735	1.1547	-0.57735
CG1227	-0.685659	-0.461785	1.14744
CG12279	-1.1518	0.64674	0.505059
CG12288	-0.792073	-0.331608	1.12368
CG12290	0.17576	-1.07623	0.900468
CG12301	0.781889	0.344914	-1.1268
CG12316	-0.504595	1.15176	-0.647168
CG12321	-1.10915	0.276465	0.832682
CG12325	-1.15057	0.490788	0.659783
CG1233	0.780323	0.346942	-1.12727
CG12333	0.15344	-1.06785	0.914412
CG12338	-0.57735	-0.57735	1.1547
CG1234	-1.06963	0.911535	0.158096
CG12341	-0.74778	-0.388094	1.13587
CG12343	0.887062	-1.08372	0.196656
CG1236	-1.11141	0.284451	0.826958
CG12375	0.387148	0.748545	-1.13569
CG12379	1.05419	-0.119035	-0.935155
CG12384	-0.770738	-0.359259	1.13
CG12391	-1.05934	0.927599	0.131743
CG12499	-1.00713	0.0144077	0.992718
CG12512	-0.564641	-0.589967	1.15461
CG12535	0.478254	0.671068	-1.14932
CG12547	-0.910431	-0.159876	1.07031
CG12560	-0.721942	-0.419477	1.14142
CG12567	-0.286289	1.11192	-0.825632
CG12576	-0.695325	1.14603	-0.450706
CG12592	0.662624	0.487648	-1.15027
CG12608	-0.864698	-0.230391	1.09509
CG12643	0.798752	0.322771	-1.12152
CG1265	0.721786	-1.14145	0.419663
CG12659	0.760465	0.372276	-1.13274
CG12699	-0.204891	1.08658	-0.881686
CG12702	-0.0380129	1.01846	-0.980452
CG1271	1.10415	-0.844721	-0.259428
CG12728	-1.00868	0.991087	0.0175944
CG12730	-1.04902	0.942448	0.106569
CG12744	0.826094	0.285649	-1.11174
CG12746	-1.1214	0.322267	0.799131
CG1275	0.891543	0.189731	-1.08127
CG12768	0.906775	0.16574	-1.07252
CG12773	-0.0540113	1.02591	-0.9719
CG12795	1.15243	-0.513484	-0.638943
CG12811	-0.369219	1.13211	-0.762891
CG12818	0.674974	-1.14885	0.473874
CG12822	-0.953613	-0.0870796	1.04069
CG12825	0.673627	0.475387	-1.14901
CG12848	0.294491	0.819686	-1.11418
CG12863	-0.621027	-0.532543	1.15357
CG12868	0.511811	-1.15231	0.640497
CG12877	-0.57735	1.1547	-0.57735
CG12883	-0.737801	-0.400345	1.13815
CG12895	0.94976	0.093861	-1.04362
CG12896	-0.46859	1.14825	-0.679662
CG12909	-0.540131	1.15392	-0.613786
CG12920	0.865063	0.22985	-1.09491
CG12929	-0.910691	-0.159456	1.07015
CG12934	-0.57735	1.1547	-0.57735
CG12935	-0.306218	-0.811086	1.1173
CG12945	-0.851864	-0.249157	1.10102
CG12948	0.930121	0.127523	-1.05764
CG12974	-0.756554	-0.377182	1.13374
CG12975	0.128926	0.929284	-1.05821
CG13001	0	0	0
CG13014	-0.510674	-0.641551	1.15223
CG13016	-1.07067	0.909831	0.16084
CG13018	-0.499531	1.15135	-0.651817
CG13025	-0.57735	1.1547	-0.57735
CG1307	0.0322085	-1.01572	0.983507
CG13077	-1.14664	0.455367	0.691273
CG13086	0.101446	0.94541	-1.04686
CG1309	0.842409	-1.10513	0.262726
CG13096	-1.06759	0.152771	0.914824
CG13097	-0.184562	-0.894862	1.07942
CG13116	-0.594657	-0.559869	1.15453
CG13117	-0.687069	-0.460177	1.14725
CG13123	-0.57735	1.1547	-0.57735
CG13124	0.408861	0.730783	-1.13964
CG13126	-0.57735	1.1547	-0.57735
CG1316	-0.427177	-0.715464	1.14264
CG1317	-0.695362	-0.450663	1.14603
CG13185	-0.0314331	1.01535	-0.983913
CG13192	-0.689389	-0.457526	1.14691
CG13197	-0.144929	-0.919628	1.06456
CG13220	-0.507811	-0.644201	1.15201
CG13248	-0.57735	1.1547	-0.57735
CG13295	-0.57735	1.1547	-0.57735
CG13315	-0.57735	1.1547	-0.57735
CG13319	-0.937414	-0.115195	1.05261
CG13339	0.881241	-1.08681	0.205568
CG13344	0.044919	0.976784	-1.0217
CG13364	-0.525708	1.1532	-0.627497
CG13365	-0.779371	-0.348173	1.12754
CG13366	0.20728	0.880116	-1.0874
CG13367	-0.966657	-0.0636454	1.0303
CG13369	0.05666	-1.02713	0.970465
CG13373	-1.13842	0.401859	0.736558
CG13377	1.02306	-0.0478286	-0.975227
CG13384	-1.12889	0.774679	0.354216
CG13390	0.372614	0.760197	-1.13281
CG13392	-0.60362	-0.550676	1.1543
CG13397	-0.57735	1.1547	-0.57735
CG13398	-0.813591	-0.302819	1.11641
CG1344	0.960092	0.0755331	-1.03562
CG13484	-0.57735	1.1547	-0.57735
CG13506	-0.589456	-0.565159	1.15462
CG13510	1.10051	-0.247505	-0.853005
CG13511	1.14081	-0.415781	-0.725032
CG13531	0.868936	0.224101	-1.09304
CG1354	-0.834217	-0.274311	1.10853
CG13551	-0.255413	-0.847523	1.10294
CG13559	1.0333	-0.0703025	-0.962994
CG13585	-0.739515	-0.398252	1.13777
CG13599	-0.57735	1.1547	-0.57735
CG13601	1.0031	-0.00623191	-0.996869
CG13603	-0.267115	1.10643	-0.839318
CG13605	0.00777528	0.99609	-1.00386
CG13623	-1.05152	0.938957	0.112561
CG13625	-0.884685	1.08499	-0.200308
CG13630	-0.201908	-0.88364	1.08555
CG13631	-0.438485	1.14434	-0.705851
CG13654	1.15043	-0.489299	-0.661132
CG13663	0.323714	-1.12176	0.798043
CG13667	-1.08973	0.875577	0.21415
CG13671	0.376275	0.75728	-1.13355
CG13689	-0.57735	1.1547	-0.57735
CG13690	0.383139	-1.13492	0.751778
CG1371	-0.556136	1.15444	-0.598308
CG13742	1.14809	-0.467229	-0.680865
CG13743	0.214411	0.875404	-1.08981
CG13751	-0.885226	-0.199478	1.0847
CG13760	0.781194	0.345814	-1.12701
CG13766	1.13388	-0.377875	-0.756001
CG13773	-0.821577	-0.29189	1.11347
CG13775	-1.0798	0.185614	0.894189
CG13784	0.767131	0.363852	-1.13098
CG13807	-1.00612	0.0123491	0.993768
CG13827	-0.671968	-0.477247	1.14921
CG13850	-0.694577	1.14615	-0.451569
CG13868	-0.458146	-0.688846	1.14699
CG13876	0.623946	0.529466	-1.15341
CG13887	1.12153	-0.79874	-0.322787
CG13895	0.907848	0.164024	-1.07187
CG13896	-0.57735	-0.57735	1.1547
CG13901	-0.989959	-0.0197883	1.00975
CG13907	0.707141	-1.14412	0.436976
CG13917	-1.12626	0.783694	0.34257
CG13919	-1.03608	0.959517	0.0765638
CG13926	-1.0056	0.0113007	0.994302
CG13933	1.14907	-0.475915	-0.673156
CG13937	-0.57735	-0.57735	1.1547
CG13982	-0.57735	1.1547	-0.57735
CG13994	0.652263	0.499044	-1.15131
CG14036	-0.162232	1.0712	-0.908965
CG14043	-0.492416	1.15072	-0.658305
CG14057	-0.836446	1.10762	-0.271174
CG1407	-1.15062	0.491337	0.659286
CG14073	-0.537766	-0.616049	1.15382
CG14079	0.173274	0.90204	-1.07531
CG14100	1.13573	-0.387346	-0.748385
CG14104	0.357988	0.771734	-1.12972
CG14117	1.03725	-0.0792172	-0.958035
CG14130	-0.839918	1.10618	-0.266265
CG14135	-0.913337	-0.155183	1.06852
CG14142	0	0	0
CG1416	1.14839	-0.469809	-0.678583
CG1418	-1.12327	0.329922	0.793352
CG14182	-1.07939	0.184462	0.894927
CG14184	-0.468134	-0.680065	1.1482
CG14194	0.937535	0.114989	-1.05252
CG14200	-0.353481	1.12873	-0.775251
CG14207	0.0600545	-1.02867	0.968619
CG14210	-1.08146	0.89121	0.190248
CG14220	1.05653	-0.931764	-0.124764
CG14229	-0.601548	-0.55281	1.15436
CG14230	0.920323	0.143787	-1.06411
CG14231	1.14202	-0.423205	-0.718813
CG14232	0.953387	-1.04087	0.0874775
CG14253	-0.605752	-0.548475	1.15423
CG14270	-1.13235	0.761976	0.370374
CG14286	-0.477055	1.14919	-0.672139
CG14322	1.13942	-0.407584	-0.731839
CG14332	0.381124	0.753397	-1.13452
CG1434	0.348173	0.779371	-1.12754
CG14341	-0.559095	-0.595415	1.15451
CG14352	-0.712184	-0.431052	1.14324
CG1440	-0.820289	1.11395	-0.293663
CG14407	-0.22799	-0.866319	1.09431
CG14408	0.98508	-1.01428	0.0292013
CG14411	0.728287	-1.14016	0.411871
CG14414	-0.947226	-0.0982886	1.04551
CG14431	-1.15468	0.583614	0.571064
CG14434	-1.1546	0.590711	0.563886
CG14435	-0.0707718	1.03351	-0.962734
CG14440	-0.57735	1.1547	-0.57735
CG14441	-1.15128	0.498749	0.652533
CG14442	-0.737729	-0.400432	1.13816
CG14450	-1.15443	0.598705	0.555729
CG14464	-0.801795	-0.318716	1.12051
CG14478	0.768388	0.362255	-1.13064
CG14480	0.590773	-1.1546	0.563823
CG14483	-1.06077	0.925446	0.135326
CG14491	0.932517	0.123496	-1.05601
CG14511	1.1514	-0.500181	-0.651222
CG14512	-0.657676	-0.493109	1.15078
CG14543	-1.08338	0.195678	0.887698
CG14544	1.15194	-0.645104	-0.506834
CG14561	1.14745	-0.461811	-0.685635
CG14562	1.13778	-0.398347	-0.739437
CG14567	-0.704617	-0.439926	1.14454
CG14610	-0.666499	-0.48335	1.14985
CG14613	-1.02831	0.0592516	0.969057
CG14615	-0.442417	1.1449	-0.70248
CG14618	0.791594	-1.12383	0.332237
CG14621	-0.57735	1.1547	-0.57735
CG14629	-0.200658	1.08511	-0.884456
CG1463	-0.688354	-0.458709	1.14706
CG14641	1.1291	-0.773966	-0.35513
CG14642	-0.0850021	1.03979	-0.954786
CG14646	-0.176588	1.07653	-0.899943
CG14647	0.897739	-1.0778	0.180057
CG14650	-0.773898	-0.355217	1.12912
CG14657	-0.57735	1.1547	-0.57735
CG14667	1.15425	-0.549214	-0.605037
CG14671	-1.15186	0.50581	0.646048
CG14683	-0.200798	1.08516	-0.884365
CG14688	0.686219	0.461146	-1.14737
CG14695	1.07507	-0.172617	-0.902454
CG14696	-0.285692	1.11176	-0.826063
CG14701	-0.219714	1.09159	-0.871873
CG14711	-0.57735	1.1547	-0.57735
CG14712	-0.57735	1.1547	-0.57735
CG14715	-0.983567	-0.0320938	1.01566
CG14721	1.06436	-0.144414	-0.919942
CG14722	-1.00192	0.998068	0.00385358
CG14764	0.046964	-1.02265	0.975691
CG14767	0.477231	0.671982	-1.14921
CG14777	0.955544	0.0836555	-1.0392
CG14803	-0.0707844	1.03351	-0.962727
CG14805	-0.456782	-0.690038	1.14682
CG14806	-0.333663	-0.79051	1.12417
CG14812	-0.427623	1.14271	-0.715088
CG14814	0.199925	0.884935	-1.08486
CG14817	-0.0871465	1.04072	-0.953575
CG14818	-0.472717	-0.676003	1.14872
CG1486	-0.254068	1.10253	-0.848459
CG14881	-0.801189	-0.319525	1.12071
CG14882	-0.57735	1.1547	-0.57735
CG14883	0.154987	0.913458	-1.06844
CG14894	-0.564861	-0.58975	1.15461
CG14903	-1.01189	0.0242196	0.98767
CG14906	-0.453093	-0.693252	1.14635
CG14907	-0.0668254	-0.964911	1.03174
CG14957	0.731976	0.407419	-1.13939
CG14961	0	0	0
CG14966	-0.700391	-0.444845	1.14524
CG14969	1.07288	-0.166721	-0.906161
CG14971	-0.883081	1.08584	-0.202762
CG14977	-0.743555	-0.393301	1.13686
CG14985	-0.628115	-0.525052	1.15317
CG14990	-0.468976	-0.679321	1.1483
CG14995	-0.653749	-0.497418	1.15117
CG14997	-1.02055	0.0424558	0.978096
CG15011	0	0	0
CG15012	-1.15332	0.527791	0.62553
CG15014	-0.57735	1.1547	-0.57735
CG15019	-0.596201	-0.558292	1.15449
CG15027	-1.14161	0.720943	0.420669
CG15073	-0.57735	1.1547	-0.57735
CG15083	0.593598	0.560948	-1.15455
CG15093	-0.723619	1.14109	-0.417473
CG15098	-0.958895	-0.0776799	1.03657
CG15099	-0.745277	-0.391182	1.13646
CG15107	0.949472	0.0943664	-1.04384
CG15111	-0.850074	-0.251743	1.10182
CG15118	-0.813046	-0.303559	1.11661
CG1513	-0.695382	-0.450641	1.14602
CG15141	1.06995	-0.158939	-0.911012
CG15160	1.12327	-0.329911	-0.79336
CG15168	-0.807063	-0.311652	1.11871
CG15209	-0.57735	1.1547	-0.57735
CG15211	-0.82766	-0.283476	1.11114
CG1523	1.1172	-0.305807	-0.811389
CG15237	-0.461768	-0.685674	1.14744
CG1529	-0.649016	-0.502586	1.1516
CG15309	1.1545	-0.595881	-0.558619
CG15317	-0.57735	1.1547	-0.57735
CG1532	-0.948037	1.04491	-0.0968756
CG15343	1.13007	-0.77046	-0.359615
CG15347	0.136337	-1.06117	0.924836
CG15356	1.14949	-0.479879	-0.669613
CG15362	-0.294417	-0.81974	1.11416
CG15382	-0.57735	1.1547	-0.57735
CG15386	1.11239	-0.287975	-0.824415
CG15387	-0.81826	-0.296446	1.11471
CG15399	-0.57735	1.1547	-0.57735
CG1542	-0.965111	1.03157	-0.0664618
CG15423	-0.57735	-0.57735	1.1547
CG15432	-0.617177	-0.536586	1.15376
CG15435	-0.704711	-0.439816	1.14453
CG15439	1.11993	-0.316412	-0.803518
CG1544	-0.504041	1.15172	-0.647678
CG15443	0.0788808	0.958224	-1.0371
CG15445	-0.421838	1.1418	-0.719962
CG15456	0.550199	0.604082	-1.15428
CG15482	-1.08837	0.21014	0.878231
CG15514	-0.660574	-0.489915	1.15049
CG15525	-0.99694	-0.00609212	1.00303
CG15535	-1.1254	0.338855	0.786544
CG15536	-0.722127	-0.419256	1.14138
CG15547	-0.871149	1.09195	-0.220798
CG15561	-0.873435	-0.217372	1.09081
CG15601	-0.57735	1.1547	-0.57735
CG15602	1.14596	-0.450183	-0.695778
CG15611	-0.560529	-0.59401	1.15454
CG15643	-1.15407	0.610052	0.544019
CG15653	-0.57735	-0.57735	1.1547
CG15695	0.194535	0.888439	-1.08297
CG15706	-0.260088	-0.844259	1.10435
CG15715	0.979531	0.0397517	-1.01928
CG15717	-0.154341	-0.913857	1.0682
CG1572	-0.592388	-0.56218	1.15457
CG15739	-0.893001	1.08047	-0.187465
CG15740	-0.57735	1.1547	-0.57735
CG15743	1.10713	-0.269491	-0.837639
CG15744	-0.57735	1.1547	-0.57735
CG15747	-0.962653	-0.0709175	1.03357
CG1575	-0.802929	1.12013	-0.3172
CG15771	-0.472172	-0.676487	1.14866
CG1578	0.591284	0.563304	-1.15459
CG15784	-1.13231	0.370201	0.762113
CG15812	-0.57735	1.1547	-0.57735
CG15814	-0.750669	-0.384516	1.13518
CG15818	-0.57735	-0.57735	1.1547
CG1582	0.522171	0.630824	-1.153
CG15820	0	0	0
CG15873	-0.291297	1.11331	-0.822008
CG15877	-0.981075	-0.0368315	1.01791
CG15879	-0.57735	1.1547	-0.57735
CG15891	-0.976449	-0.0455458	1.02199
CG15908	1.12446	-0.334855	-0.789601
CG15912	-0.57735	1.1547	-0.57735
CG15914	-0.57735	1.1547	-0.57735
CG15916	-0.425284	1.14235	-0.717062
CG15922	-0.241802	1.09873	-0.856928
CG15923	-0.57735	1.1547	-0.57735
CG1598	-0.0689727	-0.963728	1.0327
CG1603	-0.57735	1.1547	-0.57735
CG1620	-0.624679	-0.528691	1.15337
CG1622	-0.32243	1.12144	-0.799008
CG1628	-0.57735	1.1547	-0.57735
CG1632	1.12849	-0.352408	-0.776086
CG1635	-0.65223	-0.49908	1.15131
CG1636	-0.125607	1.05687	-0.931262
CG1637	1.10344	-0.846372	-0.257064
CG1640	0.451838	0.694343	-1.14618
CG1646	-0.774096	1.12906	-0.354964
CG1647	1.14112	-0.723461	-0.417663
CG1648	-0.596195	-0.558298	1.15449
CG1662	0.0334912	0.982834	-1.01632
CG1671	-1.05097	0.939726	0.111245
CG16710	-0.57735	1.1547	-0.57735
CG16711	1.03293	-0.0694735	-0.963452
CG16713	-0.57735	-0.57735	1.1547
CG16717	1.15427	-0.604465	-0.549804
CG16721	0.687345	-1.14721	0.459862
CG1673	1.11206	-0.825264	-0.2868
CG16734	-0.193364	-0.889197	1.08256
CG16743	-0.57735	1.1547	-0.57735
CG16753	0.805244	-1.11934	0.314097
CG16758	-0.408973	1.13966	-0.73069
CG1677	1.00043	-0.000862075	-0.999569
CG16787	-0.592254	-0.562317	1.15457
CG16790	-0.601617	-0.552739	1.15436
CG16791	-0.906271	-0.166546	1.07282
CG16812	0.653276	0.497936	-1.15121
CG16865	-0.57735	1.1547	-0.57735
CG16868	-0.57735	1.1547	-0.57735
CG16890	-0.8636	-0.232012	1.09561
CG16896	-0.57735	1.1547	-0.57735
CG16903	0.838824	-1.10664	0.267815
CG16908	-0.57735	1.1547	-0.57735
CG16926	0.940226	-1.05061	0.110389
CG16935	0.243154	0.856	-1.09915
CG16952	-1.14352	0.43295	0.710572
CG16953	0.0475456	0.975379	-1.02292
CG16957	1.13288	-0.372935	-0.759941
CG16972	-1.08336	0.195624	0.887733
CG16974	0.943903	0.104057	-1.04796
CG16979	0.403911	0.73487	-1.13878
CG16985	1.13596	-0.388546	-0.747414
CG16986	-1.12129	0.799471	0.321814
CG16989	1.13217	-0.369484	-0.762682
CG17002	-0.448795	-0.69698	1.14578
CG17019	-0.935401	1.05402	-0.118617
CG17029	-0.931498	-0.125211	1.05671
CG1703	-0.943406	-0.104915	1.04832
CG17059	-1.09568	0.863465	0.232212
CG17065	0.974718	-1.0235	0.0487781
CG17068	-0.277677	1.10949	-0.831817
CG17078	1.12716	-0.346475	-0.780684
CG17109	-0.425225	-0.717112	1.14234
CG17119	0.932415	0.123667	-1.05608
CG17124	0.292903	0.820841	-1.11374
CG17141	-0.57735	1.1547	-0.57735
CG17159	-0.57735	1.1547	-0.57735
CG17162	-0.57735	1.1547	-0.57735
CG17168	-1.11393	0.820353	0.293574
CG17187	0.153359	0.914461	-1.06782
CG17202	-0.591251	-0.563337	1.15459
CG17219	1.14502	-0.701724	-0.443297
CG17221	1.14329	-0.711858	-0.431436
CG17233	0.149997	-1.06653	0.916528
CG17249	0.329664	0.793547	-1.12321
CG17260	-0.106414	1.04895	-0.942538
CG17266	-1.13905	0.405451	0.733601
CG17271	-0.804034	-0.315721	1.11975
CG17272	0.729673	-1.13987	0.4102
CG17278	-0.984356	1.01494	-0.0305866
CG17292	-0.57735	1.1547	-0.57735
CG17294	-0.0544033	-0.971688	1.02609
CG17327	0.965707	-1.03108	0.0653777
CG17333	-0.643241	-0.508849	1.15209
CG17343	1.12062	-0.319149	-0.801471
CG17359	-0.57735	1.1547	-0.57735
CG17361	0.846099	0.257456	-1.10355
CG1737	0.138859	0.923314	-1.06217
CG1738	-1.15292	0.520925	0.631993
CG17385	-0.886373	-0.197717	1.08409
CG17454	-0.557684	-0.596796	1.15448
CG17486	-1.0272	0.970377	0.0568224
CG17490	-0.57735	-0.57735	1.1547
CG17493	0.630645	-1.15301	0.522362
CG17508	-0.740718	-0.396781	1.1375
CG17528	0.628349	0.524803	-1.15315
CG17544	1.14253	-0.426446	-0.716082
CG17556	-0.00958012	1.00476	-0.995176
CG17565	-0.243654	-0.855657	1.09931
CG17568	-0.575586	-0.579113	1.1547
CG17574	-1.13271	0.372119	0.760591
CG17593	-0.89779	-0.179977	1.07777
CG17597	-0.91528	-0.15203	1.06731
CG17598	1.09078	-0.217282	-0.873495
CG17600	-0.0892818	1.04165	-0.952365
CG1764	-0.354318	-0.7746	1.12892
CG17646	-1.13446	0.753643	0.380817
CG17652	-0.800251	-0.320776	1.12103
CG17660	-0.94514	-0.101915	1.04706
CG17683	-0.972375	-0.0531309	1.02551
CG17691	-1.08167	0.190846	0.890824
CG17698	0.226994	-1.09398	0.866991
CG17712	1.13759	-0.397305	-0.740289
CG17715	0.513502	0.638926	-1.15243
CG17721	-1.07493	0.90269	0.172245
CG17724	-0.76186	1.13238	-0.37052
CG17726	0.809516	0.308343	-1.11786
CG17734	-0.826781	-0.284696	1.11148
CG1774	-0.57735	1.1547	-0.57735
CG17746	-0.104221	-0.943808	1.04803
CG17754	0.483323	-1.14985	0.666523
CG17760	-0.537686	-0.616126	1.15381
CG17765	-1.14751	0.685181	0.462329
CG17768	-0.707555	-0.436491	1.14405
CG17776	-0.00479297	1.00239	-0.997595
CG17786	1.14894	-0.474737	-0.674206
CG17807	-0.57735	1.1547	-0.57735
CG17829	0.876342	0.212997	-1.08934
CG17834	0	0	0
CG17839	0.973174	0.0516508	-1.02482
CG17841	1.15363	-0.533778	-0.619853
CG1785	-1.00869	0.991082	0.0176042
CG17855	-0.401478	-0.736871	1.13835
CG17883	-1.12353	0.330989	0.792542
CG1789	1.15265	-0.635859	-0.516794
CG17896	-0.457913	-0.689051	1.14696
CG17904	0.372541	-1.1328	0.760254
CG1792	1.10408	-0.844892	-0.259183
CG17928	1.10975	-0.278586	-0.831167
CG17931	-1.15243	0.513525	0.638904
CG17977	-0.629892	-0.523164	1.15306
CG17982	-0.769381	-0.360991	1.13037
CG17985	-0.966957	-0.0630976	1.03005
CG17996	-0.846293	-0.257178	1.10347
CG18004	-0.570267	-0.584405	1.15467
CG18048	-0.822244	1.11322	-0.290973
CG18081	-0.756621	-0.377099	1.13372
CG1812	0.36778	-1.13181	0.764031
CG18135	-0.235485	1.09673	-0.861242
CG1814	-0.847332	1.10302	-0.255687
CG1815	1.04605	-0.0995378	-0.946509
CG18178	1.03653	-0.958955	-0.0775713
CG18213	-0.960059	-0.0755919	1.03565
CG1824	-0.733961	1.13898	-0.405015
CG18249	-0.57735	1.1547	-0.57735
CG18259	-0.0377803	1.01835	-0.980574
CG18262	1.15219	-0.510163	-0.642025
CG1827	-1.07302	0.167078	0.905937
CG18273	0.148986	0.917148	-1.06613
CG18324	0.359851	0.770275	-1.13013
CG18343	-0.549087	1.15425	-0.60516
CG1840	-1.02333	0.0484179	0.974912
CG18428	-0.645216	1.15193	-0.506712
CG18446	0.45713	0.689734	-1.14686
CG1847	-0.254158	-0.848397	1.10255
CG18508	-0.902638	1.07496	-0.172326
CG18528	0.713019	0.430067	-1.14309
CG18547	1.14444	-0.439189	-0.705248
CG18549	-0.985337	1.01404	-0.0287077
CG18577	-0.57735	1.1547	-0.57735
CG18596	-0.373144	1.13292	-0.759775
CG18600	-1.07892	0.183171	0.895752
CG18659	-0.566601	-0.588033	1.15463
CG18661	-0.57735	1.1547	-0.57735
CG18731	1.10162	-0.251105	-0.850516
CG18744	1.07023	-0.159682	-0.910551
CG18745	-0.286018	-0.825828	1.11185
CG18747	-0.463022	-0.684572	1.14759
CG18749	-0.57735	1.1547	-0.57735
CG18754	-0.57735	1.1547	-0.57735
CG18766	-0.57735	1.1547	-0.57735
CG18787	-0.57735	1.1547	-0.57735
CG18789	-0.57735	1.1547	-0.57735
CG18809	1.078	-0.897383	-0.180616
CG18815	-1.14522	0.700475	0.444747
CG1882	-1.02592	0.054031	0.971889
CG18853	0.922781	0.139739	-1.06252
CG18858	-0.57735	1.1547	-0.57735
CG1888	-1.15469	0.580917	0.573776
CG1890	-0.699462	-0.445923	1.14538
CG1896	-0.518297	-0.634455	1.15275
CG1902	0.733461	0.405621	-1.13908
CG1907	1.05013	-0.940896	-0.109239
CG1910	-1.15299	0.522152	0.630842
CG1927	-0.366005	-0.765433	1.13144
CG1943	-0.669241	-0.480295	1.14954
CG1951	1.06859	-0.155356	-0.91323
CG1965	-0.921106	-0.1425	1.06361
CG1979	-0.79066	-0.333465	1.12413
CG1983	-0.930744	-0.126478	1.05722
CG1998	-1.06332	0.14178	0.921544
CG2003	-1.15011	0.485979	0.664132
CG2004	-0.84212	1.10526	-0.263137
CG2006	0.150468	0.916239	-1.06671
CG2017	-0.431053	-0.712183	1.14324
CG2021	-1.12017	0.317365	0.802806
CG2023	0.9316	-1.05664	0.125039
CG2034	-0.737228	-0.401042	1.13827
CG2059	-0.59475	-0.559774	1.15452
CG2061	-0.57735	1.1547	-0.57735
CG2063	-1.15053	0.490398	0.660136
CG2064	0.414563	0.726048	-1.14061
CG2065	-0.542095	-0.611902	1.154
CG2076	1.07179	-0.163798	-0.907989
CG2082	-0.57735	1.1547	-0.57735
CG2091	-0.696463	-0.449393	1.14586
CG2100	-0.601835	-0.552514	1.15435
CG2116	1.07273	-0.166313	-0.906416
CG2124	-0.57735	1.1547	-0.57735
CG2126	-0.911301	1.06977	-0.158474
CG2129	-0.57735	1.1547	-0.57735
CG2147	-0.855576	-0.243772	1.09935
CG2162	-0.842204	1.10522	-0.263018
CG2182	-0.541318	-0.612647	1.15397
CG2186	0.280644	0.829693	-1.11034
CG2199	-1.13469	0.752704	0.381987
CG2200	-0.742808	-0.394218	1.13703
CG2201	-0.671774	-0.477464	1.14924
CG2202	0.980378	-1.01853	0.0381522
CG2211	-1.1547	0.574806	0.579891
CG2218	0.229562	0.865258	-1.09482
CG2225	1.07959	-0.185021	-0.894569
CG2246	-0.255088	-0.84775	1.10284
CG2247	0.666891	-1.1498	0.482914
CG2258	-0.57735	1.1547	-0.57735
CG2260	-0.851149	1.10134	-0.250191
CG2277	-1.01643	0.982714	0.0337198
CG2278	1.09368	-0.226049	-0.867626
CG2310	-0.664649	-0.485405	1.15005
CG2444	0.260905	0.843686	-1.10459
CG2493	-0.684923	-0.462622	1.14755
CG2519	0.342297	0.783904	-1.1262
CG2540	-0.493082	1.15078	-0.6577
CG2608	0.206709	0.880492	-1.0872
CG2611	1.10442	-0.26032	-0.844096
CG2614	-0.768179	1.1307	-0.36252
CG2641	-1.15466	0.58539	0.569273
CG2656	-1.15388	0.53923	0.614649
CG2678	1.05053	-0.110178	-0.940349
CG2685	-1.02239	0.0464001	0.975992
CG2691	-1.11203	0.82535	0.28668
CG2694	1.1509	-0.494362	-0.656537
CG2698	0.243835	-1.09937	0.855532
CG2701	0.423498	-1.14206	0.718567
CG2747	-1.15469	0.574022	0.580672
CG2765	0.854486	0.245357	-1.09984
CG2767	-1.15337	0.624675	0.528695
CG2790	-1.06721	0.151776	0.915436
CG2794	-0.57735	1.1547	-0.57735
CG2811	0.4828	-1.14979	0.666993
CG2818	-0.299686	-0.81589	1.11558
CG2841	1.02811	-0.0588106	-0.969297
CG2846	1.01003	-0.989657	-0.0203754
CG2852	1.08807	-0.878806	-0.209269
CG2865	-0.457365	-0.689529	1.14689
CG2875	-0.445503	-0.699824	1.14533
CG2889	-0.299924	-0.815716	1.11564
CG2906	-1.12058	0.801595	0.318983
CG2909	1.11053	-0.281344	-0.829191
CG2911	-0.57735	1.1547	-0.57735
CG2915	-0.571888	-0.582795	1.15468
CG2918	0.830281	-1.1101	0.279823
CG2921	1.03858	-0.0822358	-0.956343
CG2924	-0.686201	-0.461167	1.14737
CG2926	-0.932983	1.05569	-0.122709
CG2931	-0.291756	-0.821675	1.11343
CG2938	-0.832433	-0.276815	1.10925
CG2972	0.10469	0.943536	-1.04823
CG2990	-1.10326	0.846783	0.256476
CG2991	1.14394	-0.435775	-0.708166
CG30015	0.471802	0.676816	-1.14862
CG30020	0.879933	0.207558	-1.08749
CG30022	0.740246	0.397358	-1.1376
CG30046	-0.209807	1.08826	-0.878451
CG30069	-0.57735	1.1547	-0.57735
CG3008	-0.563948	-0.59065	1.1546
CG30089	1.1547	-0.57735	-0.57735
CG30090	-0.57735	-0.57735	1.1547
CG30091	0	0	0
CG30094	-1.04386	0.949438	0.094426
CG30100	-0.983934	-0.0313928	1.01533
CG30105	-0.377005	1.1337	-0.756696
CG30108	-0.686738	-0.460555	1.14729
CG30109	-0.532372	-0.62119	1.15356
CG30120	-0.672552	-0.476593	1.14914
CG30122	-1.11514	0.298058	0.817082
CG30148	-0.57735	1.1547	-0.57735
CG30159	-1.10374	0.258056	0.84568
CG30183	-0.57735	1.1547	-0.57735
CG30187	0.272893	-1.10812	0.835226
CG3021	-0.963281	1.03306	-0.0697829
CG30269	-0.57735	-0.57735	1.1547
CG30283	-0.584571	-0.5701	1.15467
CG30291	-1.04924	0.107108	0.942135
CG30338	0.542559	-1.15402	0.611456
CG30344	0.791134	0.332843	-1.12398
CG30349	-0.957539	-0.0801043	1.03764
CG3036	-0.57735	1.1547	-0.57735
CG30373	-0.688782	-0.45822	1.147
CG3038	0.910694	0.159452	-1.07015
CG30382	0.0461585	0.976121	-1.02228
CG30389	-0.590862	-0.563732	1.15459
CG30392	-0.865954	-0.228531	1.09448
CG30394	0.25657	0.846717	-1.10329
CG3040	0.940955	-1.05009	0.109137
CG30403	0	0	0
CG30414	0.884368	0.200793	-1.08516
CG30423	-0.814156	-0.30205	1.11621
CG30428	-0.648643	-0.502992	1.15163
CG30430	0.493421	0.657392	-1.15081
CG3045	-0.57735	-0.57735	1.1547
CG30456	-0.648814	-0.502805	1.15162
CG30466	-1.03709	0.958241	0.0788494
CG30467	-0.807345	-0.311272	1.11862
CG30491	0.662535	0.487748	-1.15028
CG30496	-0.57735	1.1547	-0.57735
CG3061	0.855526	0.243844	-1.09937
CG3065	1.13737	-0.396106	-0.741269
CG3071	-1.09085	0.217508	0.873345
CG3091	-0.331676	1.1237	-0.792021
CG31051	0.949219	0.0948085	-1.04403
CG31064	-1.13486	0.752001	0.382861
CG3107	-0.794103	-0.32893	1.12303
CG31075	-1.1537	0.618427	0.535275
CG31098	0.555719	-1.15443	0.598714
CG31109	0.205591	-1.08682	0.881227
CG31111	1.14749	-0.462159	-0.68533
CG31122	0.932092	0.12421	-1.0563
CG31126	-1.14647	0.454022	0.692445
CG31142	0.400023	0.738064	-1.13809
CG31156	0.293304	-1.11385	0.82055
CG31174	-0.203781	-0.882414	1.08619
CG31195	1.09018	-0.215507	-0.874676
CG31211	-0.90768	-0.164292	1.07197
CG31219	-1.03972	0.95487	0.0848522
CG31223	-1.03142	0.0661175	0.965301
CG31224	-0.3895	-0.746641	1.13614
CG31229	-0.961337	-0.0732932	1.03463
CG31249	0.190615	-1.08159	0.890973
CG31251	-0.57735	1.1547	-0.57735
CG31278	0	0	0
CG31287	0.536791	0.616981	-1.15377
CG31301	0.6865	0.460826	-1.14733
CG31324	-0.795537	-0.327035	1.12257
CG31337	0.654537	0.496556	-1.15109
CG31342	-0.126902	1.05739	-0.930492
CG31344	-0.758534	-0.374702	1.13324
CG31357	-0.168577	1.07357	-0.904997
CG31360	-1.14729	0.460502	0.686784
CG31365	-1.15028	0.662596	0.48768
CG31368	-1.13327	0.758398	0.374872
CG31370	-0.610358	-0.543701	1.15406
CG31431	-1.13559	0.386613	0.748976
CG31457	-0.57735	1.1547	-0.57735
CG31460	-0.902642	-0.172319	1.07496
CG3149	-0.488574	1.15036	-0.661788
CG31510	0.0705407	-1.0334	0.962862
CG31522	-0.94121	-0.108699	1.04991
CG31523	-0.737415	-0.400815	1.13823
CG31548	-0.56108	-0.593469	1.15455
CG31549	-1.0848	0.885042	0.199761
CG31550	-0.707117	-0.437004	1.14412
CG3156	0.451353	0.694764	-1.14612
CG3163	-1.07053	0.910066	0.160462
CG31635	0.0914992	0.951106	-1.04261
CG31637	0.514237	-1.15248	0.638241
CG31638	0.911315	0.15845	-1.06977
CG3164	0.824514	0.287838	-1.11235
CG31643	1.15124	-0.652989	-0.49825
CG31648	0.0443698	-1.02145	0.977077
CG3165	-1.104	0.258938	0.845064
CG31650	0.958626	-1.03679	0.0781617
CG31673	-0.537585	-0.616222	1.15381
CG31678	-0.960182	-0.0753709	1.03555
CG31683	-0.862238	-0.234019	1.09626
CG31687	0.288843	0.823787	-1.11263
CG31688	0.904055	0.170077	-1.07413
CG31689	1.07513	-0.172763	-0.902363
CG31694	0.410108	0.72975	-1.13986
CG31705	0.835426	0.272611	-1.10804
CG31710	1.15456	-0.561598	-0.59296
CG31712	-0.022765	1.01119	-0.988423
CG31715	-0.789541	-0.334934	1.12448
CG31717	-0.696011	-0.449915	1.14593
CG31729	-0.463691	1.14767	-0.683984
CG31751	1.14657	-0.691724	-0.454849
CG31759	-0.57735	1.1547	-0.57735
CG3176	-1.07846	0.181897	0.896566
CG31777	0.238729	0.859031	-1.09776
CG31778	-0.0796463	1.03744	-0.957795
CG31800	-0.97863	-0.0414501	1.02008
CG31821	0	0	0
CG31832	-0.653894	1.15115	-0.49726
CG3184	0.981961	0.0351502	-1.01711
CG31855	1.05566	-0.122623	-0.933034
CG31886	-1.14158	0.420493	0.721091
CG31898	0	0	0
CG31908	-0.877487	-0.211266	1.08875
CG3191	-0.57735	1.1547	-0.57735
CG31915	-1.1538	0.616282	0.537523
CG31917	-0.630107	-0.522935	1.15304
CG31935	1.14404	-0.436451	-0.707589
CG31937	0.903954	-1.07419	0.170237
CG31955	-0.577128	-0.577573	1.1547
CG31957	-0.738489	1.13799	-0.399505
CG3198	0.620269	0.533341	-1.15361
CG31998	-0.529676	-0.623747	1.15342
CG31999	-0.633152	-0.519688	1.15284
CG32022	-1.07176	0.163734	0.908028
CG32039	-0.661911	-0.488438	1.15035
CG32066	-0.537944	-0.61588	1.15382
CG32069	-0.0916901	1.04269	-0.950997
CG32075	0.985268	0.0288392	-1.01411
CG32095	-0.57735	1.1547	-0.57735
CG32099	0.244629	0.854987	-1.09962
CG32104	0	0	0
CG32109	-0.57735	1.1547	-0.57735
CG32112	0.609612	0.544476	-1.15409
CG32147	0.299761	0.815835	-1.1156
CG32152	-0.57735	1.1547	-0.57735
CG32163	-0.737733	-0.400427	1.13816
CG32170	-0.57735	-0.57735	1.1547
CG32176	1.14592	-0.44986	-0.696058
CG32195	0.171173	0.903365	-1.07454
CG32196	1.11825	-0.80839	-0.309863
CG32202	-0.453147	-0.693206	1.14635
CG32221	0.225615	0.867919	-1.09353
CG3223	-0.902178	1.07523	-0.173055
CG3224	-1.12166	0.798332	0.32333
CG32243	-0.679461	-0.468817	1.14828
CG3226	-0.970359	-0.056856	1.02722
CG32262	0	0	0
CG32264	-0.683977	-0.463699	1.14768
CG32267	-1.10214	0.252798	0.849341
CG32276	-0.888207	-0.194892	1.0831
CG32278	-0.054295	-0.971746	1.02604
CG32280	-0.863432	-0.232259	1.09569
CG32284	0.309203	0.808879	-1.11808
CG32335	-0.0969935	1.04496	-0.947969
CG32344	-1.09592	0.232975	0.862947
CG32365	0.165801	0.906737	-1.07254
CG32368	1.07626	-0.175839	-0.900417
CG32369	0.631895	0.52103	-1.15293
CG32407	-0.974169	-0.049801	1.02397
CG32409	-0.546872	-0.607301	1.15417
CG32425	-0.631929	-0.520994	1.15292
CG32428	-0.809876	-0.307856	1.11773
CG32441	-0.762809	-0.369323	1.13213
CG32448	-1.07286	0.906197	0.166665
CG32452	-0.57735	1.1547	-0.57735
CG3246	-0.262503	1.10507	-0.842565
CG32473	-0.880356	-0.206915	1.08727
CG32486	-0.690448	-0.456312	1.14676
CG32512	-0.223614	-0.869263	1.09288
CG32521	0.386117	-1.13549	0.749377
CG32533	-0.915087	-0.152344	1.06743
CG32537	0.101171	-1.04674	0.945569
CG32544	1.1547	-0.57735	-0.57735
CG32549	-0.61534	-0.538508	1.15385
CG32576	-1.01141	0.0232171	0.988189
CG32579	-0.643254	-0.508836	1.15209
CG32590	-0.979947	1.01891	-0.0389675
CG3262	1.14359	-0.710195	-0.433392
CG32625	1.14603	-0.450694	-0.695336
CG32638	0.959928	0.0758264	-1.03575
CG32640	1.07431	-0.170546	-0.903759
CG32641	0.532047	-1.15355	0.621498
CG32687	1.1547	-0.57735	-0.57735
CG32706	-1.04379	0.0942456	0.949541
CG32708	-0.42845	1.14284	-0.714389
CG32736	-0.57735	-0.57735	1.1547
CG32756	0.599699	-1.15441	0.554709
CG32767	1.1434	-0.711239	-0.432165
CG32772	-1.11705	0.305254	0.811798
CG32795	0.0659879	0.965372	-1.03136
CG32803	1.00979	-0.0198684	-0.989918
CG32809	-0.57735	1.1547	-0.57735
CG3281	1.10358	-0.257531	-0.846046
CG32813	1.13294	-0.373236	-0.759702
CG32815	-0.57735	1.1547	-0.57735
CG32816	0.981425	0.0361677	-1.01759
CG32817	-0.57735	1.1547	-0.57735
CG32850	0.800535	0.320398	-1.12093
CG32856	-1.10095	0.852032	0.248915
CG3294	-0.57735	1.1547	-0.57735
CG3295	1.06546	-0.147259	-0.918205
CG33051	-0.632505	-0.520379	1.15288
CG33054	-0.845523	-0.25828	1.1038
CG33056	-0.728296	-0.411861	1.14016
CG33057	-0.192248	1.08217	-0.889919
CG3308	-0.877049	-0.211928	1.08898
CG3309	0.121156	0.933902	-1.05506
CG33090	-0.696594	-0.449241	1.14584
CG33095	-0.736291	-0.402183	1.13847
CG33096	-0.57735	1.1547	-0.57735
CG33107	1.14175	-0.421551	-0.720203
CG33111	-1.0061	0.012308	0.993789
CG33116	1.10802	-0.272545	-0.835473
CG33129	-0.75548	-0.378526	1.13401
CG33144	0.749374	0.386121	-1.1355
CG33155	-0.253571	-0.848805	1.10238
CG33158	-0.880291	-0.207014	1.08731
CG33169	-0.376833	1.13367	-0.756834
CG33170	1.04826	-0.10478	-0.943484
CG33181	-0.193789	1.08271	-0.888922
CG33199	-0.57735	1.1547	-0.57735
CG33217	0.147858	-1.0657	0.917839
CG33225	-0.798042	-0.323714	1.12176
CG33226	-0.57735	1.1547	-0.57735
CG33228	-0.826431	-0.285182	1.11161
CG33229	-0.332875	-0.791109	1.12398
CG33230	-0.753199	1.13457	-0.38137
CG3328	0.991	0.0177628	-1.00876
CG33298	0.790344	0.333881	-1.12422
CG33303	-0.455341	-0.691296	1.14664
CG33332	-1.15469	0.582497	0.572188
CG3335	0.832836	0.276249	-1.10909
CG3337	-0.844379	-0.259916	1.1043
CG3342	-0.924614	-0.136707	1.06132
CG33459	-0.820181	-0.293811	1.11399
CG33460	-0.646197	-0.505649	1.15185
CG33461	-0.57735	-0.57735	1.1547
CG33462	0	0	0
CG33465	-0.630871	-0.522122	1.15299
CG33470	0.747448	0.388504	-1.13595
CG3348	-0.576608	-0.578092	1.1547
CG33494	-0.961712	1.03433	-0.0726167
CG33506	-0.312036	-0.806777	1.11881
CG33510	-0.972618	-0.0526823	1.0253
CG33521	0.589054	0.565567	-1.15462
CG33523	-0.334853	1.12446	-0.789603
CG3356	1.14992	-0.484018	-0.665898
CG3358	-0.00308265	-0.998455	1.00154
CG33635	-0.674444	-0.47447	1.14891
CG33671	-0.0363884	-0.981309	1.0177
CG33672	1.09651	-0.234794	-0.861712
CG3368	-1.11707	0.305333	0.81174
CG33695	-0.57735	1.1547	-0.57735
CG33722	-0.57735	1.1547	-0.57735
CG3376	1.05232	-0.114507	-0.937818
CG33774	0.0553951	0.971151	-1.02655
CG33785	0.39251	-1.13671	0.744198
CG33786	1.13053	-0.361719	-0.768808
CG3386	-0.57735	1.1547	-0.57735
CG33926	-0.810158	-0.307475	1.11763
CG33932	-0.787031	-0.33822	1.12525
CG33939	-0.423907	-0.718222	1.14213
CG33941	0.484367	0.665584	-1.14995
CG33964	0.835941	-1.10783	0.271885
CG33969	-1.01042	0.989247	0.0211696
CG33977	-0.927937	-0.131178	1.05912
CG33978	0.613857	0.540057	-1.15391
CG33981	-0.57735	-0.57735	1.1547
CG33995	-0.532226	-0.621328	1.15355
CG34001	-0.57735	1.1547	-0.57735
CG34008	0.0619661	0.967576	-1.02954
CG34015	-0.925942	-0.134502	1.06044
CG3402	0.55157	0.602753	-1.15432
CG34039	-0.57735	1.1547	-0.57735
CG34054	-0.509784	1.15216	-0.642376
CG3407	-0.57735	1.1547	-0.57735
CG3408	0.300604	-1.11582	0.815217
CG34112	-0.57735	1.1547	-0.57735
CG34117	-0.604928	-0.549326	1.15425
CG34120	-0.57735	1.1547	-0.57735
CG34125	-0.633081	-0.519764	1.15285
CG34126	1.01959	-0.979188	-0.0403991
CG34132	0.00471089	-1.00235	0.997636
CG34133	-0.837142	-0.270193	1.10733
CG34135	0.931286	0.125568	-1.05685
CG34136	-0.647043	-0.50473	1.15177
CG34148	-0.57735	1.1547	-0.57735
CG34150	-0.490276	1.15052	-0.660247
CG34159	-0.0825742	-0.956153	1.03873
CG34163	-0.869981	-0.222543	1.09252
CG34164	1.14569	-0.448172	-0.697519
CG34174	-0.57735	1.1547	-0.57735
CG34179	-0.57735	1.1547	-0.57735
CG34183	-0.987197	-0.0251321	1.01233
CG34195	0.250531	0.850914	-1.10144
CG3420	-1.13132	0.365461	0.765862
CG34200	0.0700413	0.963138	-1.03318
CG34213	-0.956524	-0.0819132	1.03844
CG34228	-1.14674	0.456171	0.690571
CG34229	-1.07473	0.903035	0.171696
CG34231	0.430427	0.712714	-1.14314
CG34232	0.430835	0.712368	-1.1432
CG34242	-0.645983	1.15186	-0.505881
CG34250	0.360024	0.770139	-1.13016
CG34253	0.163137	0.908401	-1.07154
CG34261	-0.926359	1.06017	-0.133808
CG34288	-0.787945	-0.337024	1.12497
CG34293	-1.15024	0.487288	0.66295
CG3430	0.963356	0.0696458	-1.033
CG34310	-0.57735	1.1547	-0.57735
CG34315	1.0624	-0.139424	-0.922972
CG34317	-0.77148	-0.358312	1.12979
CG34331	0.93951	0.111615	-1.05112
CG3434	-0.325558	1.12221	-0.796652
CG34348	-0.731705	-0.407747	1.13945
CG3436	0.744798	-1.13657	0.391771
CG3437	-0.57735	1.1547	-0.57735
CG34376	-0.478482	-0.670864	1.14935
CG34401	0.76405	0.367756	-1.13181
CG34404	-0.57735	1.1547	-0.57735
CG34408	-0.430501	1.14315	-0.712652
CG34417	0	0	0
CG34423	1.09615	-0.862476	-0.23367
CG34436	-0.603372	-0.550931	1.1543
CG34437	0.30154	0.814531	-1.11607
CG34454	-1.14476	0.441466	0.703297
CG3448	1.14082	-0.415807	-0.72501
CG3500	-1.0444	0.0956692	0.948727
CG3505	-1.13925	0.406579	0.73267
CG3511	-0.57735	1.1547	-0.57735
CG3527	0.0103183	0.994801	-1.00512
CG3529	1.15461	-0.589889	-0.56472
CG3530	0.927796	0.131413	-1.05921
CG3534	-0.643073	-0.509031	1.1521
CG3542	-0.686423	-0.460913	1.14734
CG3548	-0.15823	1.06968	-0.911452
CG3552	-0.57735	1.1547	-0.57735
CG3558	-0.699356	-0.446045	1.1454
CG3566	-1.15138	0.499887	0.651492
CG3568	-0.57735	1.1547	-0.57735
CG3587	-0.86604	-0.228403	1.09444
CG3589	-1.14502	0.443318	0.701706
CG3594	0.745984	0.390311	-1.13629
CG3603	-0.603297	1.15431	-0.551009
CG3609	0.276617	-1.10919	0.832574
CG3618	0.964933	0.066786	-1.03172
CG3625	-0.57735	1.1547	-0.57735
CG3626	-0.969817	1.02767	-0.0578542
CG3630	-0.57735	1.1547	-0.57735
CG3631	-0.015537	1.00768	-0.992141
CG3632	0.887577	0.195863	-1.08344
CG3634	1.0126	-0.0256885	-0.986908
CG3635	1.03117	-0.0655691	-0.965602
CG3638	-0.674427	-0.474489	1.14892
CG3645	-1.07058	0.909974	0.160611
CG3651	1.13085	-0.767632	-0.363215
CG3652	-1.09712	0.236711	0.860407
CG3662	-0.625321	1.15333	-0.528012
CG3663	-1.15399	0.541816	0.61217
CG3678	-0.975325	1.02297	-0.047647
CG3700	-0.57735	1.1547	-0.57735
CG3702	1.15406	-0.543707	-0.610352
CG3704	0.996801	0.00636795	-1.00317
CG3709	-0.57735	1.1547	-0.57735
CG3719	0.312668	-1.11898	0.806307
CG3726	-0.630768	-0.522231	1.153
CG3732	0.218076	-1.09104	0.872966
CG3735	-0.57735	1.1547	-0.57735
CG3740	-0.0937459	-0.949826	1.04357
CG3744	1.15077	-0.492918	-0.657849
CG3756	-1.07032	0.910416	0.159899
CG3760	-0.938466	-0.113399	1.05187
CG3770	1.15201	-0.507766	-0.644243
CG3776	0.772751	-1.12944	0.356686
CG3781	1.03733	-0.079393	-0.957937
CG3788	-0.57735	1.1547	-0.57735
CG3792	0.116239	-1.05304	0.936801
CG3793	1.11676	-0.304142	-0.812617
CG3803	-0.934472	-0.120193	1.05466
CG3808	-0.453163	-0.693191	1.14635
CG3815	1.1038	-0.258276	-0.845526
CG3817	-0.826367	-0.285271	1.11164
CG3829	-0.464409	1.14776	-0.683352
CG3831	0.941843	0.107609	-1.04945
CG3847	-0.248458	-0.852347	1.10081
CG3857	1.15441	-0.554765	-0.599645
CG3860	-0.978299	-0.0420731	1.02037
CG3862	-0.57735	1.1547	-0.57735
CG3894	0.395703	0.741597	-1.1373
CG3902	0.535737	0.617987	-1.15372
CG3907	0.95428	-1.04018	0.0858985
CG3909	1.03536	-0.0749301	-0.960427
CG3918	-0.156864	-0.912298	1.06916
CG3919	0.11762	0.935988	-1.05361
CG3939	-0.983417	-0.0323792	1.0158
CG3961	0.226509	0.867317	-1.09383
CG3995	1.14477	-0.441496	-0.703271
CG40006	0.123411	0.932567	-1.05598
CG4004	-0.62763	-0.525566	1.1532
CG40045	-0.643005	-0.509104	1.15211
CG40160	-1.152	0.507621	0.644377
CG40191	0.896375	-1.07857	0.182197
CG4022	-1.1398	0.73004	0.409758
CG40228	-0.718617	-0.423438	1.14206
CG4025	0.964343	-1.0322	0.0678568
CG4036	-0.771768	-0.357944	1.12971
CG4038	0.715078	0.427634	-1.14271
CG4041	0.52071	0.632196	-1.15291
CG4042	0.608731	-1.15412	0.545391
CG40439	0	0	0
CG4045	-0.166716	1.07288	-0.906165
CG40472	-0.976217	1.0222	-0.04598
CG4049	1.1546	-0.590569	-0.56403
CG4069	0.99636	-1.0036	0.00724028
CG4078	-0.274129	1.10848	-0.834347
CG4080	-0.552304	-0.602039	1.15434
CG4098	-0.57735	1.1547	-0.57735
CG4101	-0.6755	-0.473283	1.14878
CG41099	-1.15152	0.501584	0.649936
CG41128	-0.883229	-0.202537	1.08577
CG4119	0.700044	0.445248	-1.14529
CG41378	-0.733571	-0.405487	1.13906
CG4186	0.072445	-1.03425	0.961807
CG4199	-0.895776	-0.183133	1.07891
CG42231	-0.659365	-0.491249	1.15061
CG42232	1.09985	-0.854476	-0.24537
CG42233	0.549354	0.604901	-1.15426
CG42237	0.941039	0.108992	-1.05003
CG42238	-0.787592	-0.337487	1.12508
CG42239	-1.04373	0.949615	0.0941157
CG42240	0.907076	-1.07234	0.165259
CG42245	-0.174023	-0.901567	1.07559
CG42258	-0.867867	-0.225692	1.09356
CG42259	0.305584	0.811555	-1.11714
CG42271	-1.14483	0.702875	0.441957
CG4230	-1.10581	0.840807	0.265003
[truncated: 4,793 more rows]
