# Supplementary material for: A single-cell survey of Drosophila blood
Source: eLife. 2020 May 12;9:e54818. doi: 10.7554/eLife.54818 (PMC7237219; doi:10.7554/eLife.54818)
Supplement: Supplementary file 5. [file elife-54818-supp5.xlsx]

## Sheet: LM1
gene	Unwouned_AverageExpression	Wounded_AverageExpression	Wasp inf. 24h_AverageExpression	Wasp inf. 48h_AverageExpression
128up	-0.0779132	-1.16151	1.28181	-0.0423906
14-3-3epsilon	-0.846957	-0.692962	0.214625	1.32529
14-3-3zeta	-0.473463	-1.04542	1.27395	0.244934
140up	-0.0195706	1.3787	-0.975534	-0.383593
18SrRNA-Psi:CR41602	-0.666663	0.0100709	1.40994	-0.753347
18w	-0.651277	-0.651277	-0.155987	1.45854
26-29-p	0.86414	0.861046	-0.753676	-0.971511
28SrRNA-Psi:CR40741	1.22768	0.396807	-0.723141	-0.901343
28SrRNA-Psi:CR41609	1.08397	0.588744	-0.637094	-1.03562
28SrRNA-Psi:CR45853	1.37154	0.115414	-0.746929	-0.740029
28SrRNA-Psi:CR45855	-0.866039	-0.704087	1.29574	0.274382
28SrRNA-Psi:CR45859	-0.802203	-0.835294	1.21753	0.419965
28SrRNA-Psi:CR45860	1.17236	0.489112	-0.775565	-0.885909
312	-1.13501	-0.54611	0.825698	0.855421
4E-T	0.855326	0.816778	-1.1549	-0.517207
5.8SrRNA-Psi:CR45854	-0.733138	-0.733138	1.38507	0.0812048
5.8SrRNA-Psi:CR45863	-0.60048	-0.802234	1.41271	-0.00999458
5PtaseI	-0.946127	-0.610059	0.267302	1.28888
a	-0.0269324	0.941285	0.463486	-1.37784
A16	-0.833216	-0.592841	0.0283866	1.39767
a6	0.868977	0.214422	-1.43948	0.356082
AANATL2	-0.5	-0.5	-0.5	1.5
Aatf	-0.496493	-1.05334	1.24554	0.304294
aay	0.863339	0.783125	-1.20135	-0.445118
ab	-0.292059	1.47419	-0.444834	-0.737294
ABCA	0.597417	1.09406	-0.934008	-0.757468
ABCB7	1.46235	-0.178201	-0.693331	-0.590819
ABCD	-0.54404	1.28873	-0.991183	0.246497
abd-A	-0.5	-0.5	-0.5	1.5
Abi	-0.406344	0.590646	-1.20324	1.01894
Abl	0.992337	0.683436	-1.10628	-0.569488
abo	1.40708	-0.120845	-0.94173	-0.344501
Abp1	0.967124	0.698125	-1.14147	-0.523783
abs	0.874854	-1.18504	-0.470282	0.780471
Ac13E	0.948212	0.582468	-0.222138	-1.30854
Ac3	-0.638774	-0.638774	-0.18823	1.46578
Ac76E	-0.902486	-0.586373	1.34996	0.138897
Ac78C	-1.09126	-0.576097	0.624857	1.0425
Acbp1	-0.588994	-1.1009	0.763568	0.926324
Acbp3	-0.771119	-0.771119	1.32857	0.213667
Acbp5	0.564569	1.08127	-1.10373	-0.542108
Acbp6	-0.0947012	-0.832623	1.43005	-0.502724
ACC	0.560019	1.01977	-0.343464	-1.23632
AcCoAS	0.736014	-0.252007	0.825153	-1.30916
Ace	-0.079615	0.305629	1.08589	-1.3119
Acer	0.864718	0.866756	-0.897322	-0.834152
achi	1.36438	0.0870942	-0.528878	-0.922593
acj6	0.964979	0.741994	-1.02867	-0.678303
Ack	0.536796	1.11625	-1.04965	-0.603388
Ack-like	0.480721	-0.562811	1.14757	-1.06548
Acn	-0.826068	-0.879254	1.06534	0.639986
Acox57D-d	0.576068	1.11304	-0.881478	-0.807634
Acox57D-p	0.369313	1.23863	-0.939396	-0.668543
Acp95EF	0.837402	0.890954	-0.788845	-0.939511
Acph-1	0.506789	1.14558	-1.00738	-0.644984
Acsl	0.824229	0.388946	0.240015	-1.45319
Act42A	-0.86025	-0.669252	0.198014	1.33149
Act57B	-0.97724	0.654833	-0.723168	1.04557
Act5C	-0.247974	0.464059	-1.2699	1.05381
Act79B	0.515274	-1.23592	1.04856	-0.327916
Act87E	-0.849835	-0.849835	0.61412	1.08555
Act88F	-0.938512	-0.674887	1.23225	0.381146
Actbeta	-0.101618	1.43168	-0.831542	-0.498515
Actn	0.8547	0.876358	-0.825511	-0.905547
Acyp2	-1.38265	0.762816	0.706339	-0.0865085
Ada	0.498735	-1.49735	0.572045	0.426573
Ada1-1	-1.20147	-0.331052	1.13542	0.397099
Ada1-2	1.3782	0.0898236	-0.820428	-0.647599
Ada2a	-0.800682	-0.917631	0.716745	1.00157
Ada2b	-0.580502	-0.339832	-0.570372	1.49071
AdamTS-A	-0.941545	-0.73984	1.11692	0.564467
Adar	1.07874	0.615363	-0.953465	-0.740641
Adck1	0.607133	-0.165247	-1.34042	0.898532
Adck5	-0.422933	1.07798	-1.17739	0.522348
ADD1	0.143724	-0.905452	-0.585931	1.34766
AdenoK	0.543026	-0.278757	1.00639	-1.27066
Adf1	-0.679574	-1.02697	0.736309	0.970236
Adgf-A	-1.05386	-0.620847	0.611963	1.06275
Adh	-0.687812	-0.130351	-0.633806	1.45197
Adi1	-0.444402	-1.08305	0.2826	1.24485
AdipoR	-1.09681	-0.527601	0.496546	1.12787
Adk1	-0.495411	-0.444503	-0.558456	1.49837
Adk2	-0.912521	-0.620733	1.31734	0.215919
Adk3	1.00796	0.703692	-0.74638	-0.965272
AdoR	-0.508354	-0.508354	-0.483187	1.49989
adp	0.72804	0.991183	-0.929071	-0.790152
AdSL	1.16854	0.496928	-0.851489	-0.813974
AdSS	0.121999	1.11278	0.0842086	-1.31899
Aduk	0.288065	-0.795149	-0.784772	1.29186
Ady43A	-0.449649	-0.469521	-0.578425	1.49759
Aef1	-1.03538	-0.677945	0.874706	0.838615
aft	0.7107	1.00849	-0.855876	-0.863319
Afti	-1.25646	1.18721	0.103371	-0.0341158
Ag5r2	1.47187	-0.62692	-0.62692	-0.218031
AGBE	-0.596625	0.0816331	1.3766	-0.861603
AgmNAT	-0.237078	0.705958	0.846184	-1.31506
ago	0.989487	-0.562506	0.68466	-1.11164
AGO1	0.914134	0.812658	-0.944149	-0.782643
AGO2	-0.634632	0.874258	-1.0696	0.829978
AGO3	-0.375654	1.41065	-0.925744	-0.109257
Agpat1	0.0561774	1.39449	-0.729064	-0.721603
Agpat3	-1.47419	0.242252	0.683973	0.547963
Agpat4	-1.31794	1.03581	0.415226	-0.133092
agt	0.932539	0.796217	-0.896858	-0.831898
AhcyL1	0.899894	0.821143	-0.728365	-0.992673
AIF	0.860584	0.493246	0.0645958	-1.41843
AIMP1	-0.865703	-0.801224	1.16458	0.502346
AIMP2	-0.0712611	-1.26087	1.17491	0.157216
AIMP3	-0.905879	-0.819021	0.760104	0.964796
Ak6	-0.287425	-0.495969	1.47902	-0.695627
Akap200	-0.756645	-0.870653	0.398074	1.22922
Akh	0.958974	-0.987307	-0.729201	0.757535
akirin	-0.843154	-0.877266	0.719546	1.00087
Akt1	1.1585	-1.09522	-0.509327	0.446046
Aladin	-0.905772	1.41415	-0.413135	-0.095245
Alas	1.0219	0.671436	-1.03535	-0.657984
alc	0.790496	0.937144	-0.911286	-0.816354
Aldh	0.898271	0.820752	-1.00434	-0.714679
Aldh-III	0.975776	0.746439	-0.799156	-0.923059
Aldh7A1	1.08105	0.455966	-0.298295	-1.23872
Alg-2	-0.816751	-0.59768	0.00886394	1.40557
Alg1	1.49937	-0.493551	-0.53788	-0.467943
Alg10	0.607126	-1.32771	0.912095	-0.191516
Alg11	1.33731	-0.750465	0.194529	-0.781378
Alg14	-0.570204	-1.11085	0.722383	0.958669
Alg2	-0.879073	-0.727841	0.352686	1.25423
Alg9	-0.00240922	1.28927	-1.14829	-0.138578
Alh	-0.758983	-0.400062	1.47177	-0.312722
alien	-1.11436	-0.471213	0.419188	1.16638
ALiX	1.1389	0.508748	-0.61563	-1.03202
Alk	1.48981	-0.499872	-0.352466	-0.63747
AlkB	-0.999176	-0.39542	0.0366765	1.35792
Alp12	0.736851	0.978269	-0.978436	-0.736685
alph	-0.642076	-1.06218	0.791771	0.91248
alpha-Cat	-0.28902	-1.00653	-0.0816621	1.37721
alpha-Est1	1.377	0.101798	-0.732848	-0.74595
alpha-Est10	0.0463219	1.39703	-0.674113	-0.76924
alpha-Est3	1.11259	-1.24596	-0.250198	0.383571
alpha-Est7	0.914498	0.814843	-0.911651	-0.81769
alpha-Est8	-0.297612	-0.849341	1.44878	-0.301822
alpha-Est9	0.855351	0.688084	-0.222254	-1.32118
alpha-Man-Ib	-0.408405	1.44298	-0.845809	-0.188763
alpha-Man-Ic	-1.20263	0.831719	0.815195	-0.444288
alpha-Man-IIb	-0.857535	-0.805002	0.488782	1.17375
alpha-PheRS	-1.36952	-0.00762682	0.985297	0.391849
alpha-Spec	0.647759	1.00337	-0.501098	-1.15003
alpha4GT1	0.767132	0.347287	-1.47098	0.356556
alphaCOP	0.91169	0.815069	-0.945945	-0.780815
alphaSnap	-1.12186	-0.0751629	-0.115397	1.31242
alphaTub67C	-1.19989	0.855613	-0.447913	0.79219
alphaTub84B	-0.883832	-0.819266	0.630901	1.0722
alphaTub84D	1.0427	0.208623	0.111349	-1.36267
alphaTub85E	-0.969045	0.123629	-0.49607	1.34149
Alr	0.777451	0.928099	-0.653085	-1.05246
Als2	1.1455	0.51475	-0.979541	-0.680708
alt	-0.593711	-1.10046	0.873313	0.820861
Ama	0.83007	0.87996	-1.04808	-0.661947
Amacr	1.02436	0.604393	-1.17423	-0.454523
amn	1.43088	-0.0803242	-0.544666	-0.805892
AMPdeam	-0.775139	-0.946382	0.964933	0.756588
Amph	1.17542	0.382002	-0.418373	-1.13905
AMPKalpha	0.868653	0.851769	-1.00164	-0.71878
Amun	-0.572946	-0.520113	-0.403161	1.49622
amx	-0.468074	-0.912154	-0.0157081	1.39594
ana1	-0.0513268	1.4184	-0.523765	-0.84331
ana2	1.02004	0.636925	-1.12939	-0.527572
ana3	0.614671	1.08281	-0.915796	-0.781682
Ance	-0.429566	-0.905004	1.41089	-0.0763215
Ance-2	-0.896514	-0.201286	1.43014	-0.33234
Ance-3	1.32008	0.231501	-0.782031	-0.769554
Ance-4	-0.871233	-0.794878	1.16559	0.50052
Ance-5	1.01955	0.681495	-1.00753	-0.693519
anchor	1.37566	0.0760258	-0.880869	-0.570821
angel	-0.629935	-0.998339	0.439394	1.18888
Ank	0.727031	0.531519	-1.46502	0.206471
Ank2	-0.861867	-0.861867	0.741993	0.981741
anne	0.40292	1.05178	-1.30758	-0.147121
anox	-0.37815	-1.0575	1.31286	0.12279
Ant2	-0.264292	-0.735421	1.47186	-0.472151
Antp	-0.608806	-0.608806	1.47985	-0.262234
antr	1.14388	0.294946	-0.185825	-1.253
AnxB10	0.529222	0.927054	-1.36064	-0.0956327
AnxB11	0.875541	0.685405	-1.30267	-0.25828
AnxB9	-1.13467	-0.475483	0.496746	1.11341
aop	0.933179	0.705745	-0.439946	-1.19898
aos	-0.839667	-0.15913	-0.441568	1.44037
Aos1	-0.603496	-0.951765	1.28779	0.267476
AOX1	1.39116	0.0598467	-0.660749	-0.790257
AOX3	1.10213	0.591599	-0.86882	-0.824908
ap	-1.48442	0.348231	0.69009	0.4461
AP-1-2beta	0.868013	0.807188	-1.14732	-0.527882
AP-1gamma	0.528218	1.09741	-1.12533	-0.500306
AP-1mu	0.994839	0.617834	-1.21144	-0.401232
AP-1sigma	-1.10901	-0.547914	0.608017	1.04891
AP-2alpha	-0.390527	0.762453	-1.23405	0.862128
AP-2mu	0.901495	0.803389	-1.06287	-0.642017
AP-2sigma	-0.929358	-0.323193	-0.16347	1.41602
Apc	-0.110267	1.31023	-1.12495	-0.0750084
APC10	0.326505	1.22792	-0.479318	-1.07511
Apc2	0.685035	1.02686	-0.7818	-0.930095
APC4	1.46384	-0.191074	-0.563231	-0.709533
ApepP	0.727416	0.987328	-0.743626	-0.971118
Apf	-1.04061	-0.632743	1.07826	0.595093
aph-1	-0.789319	-0.762819	0.232692	1.31945
aPKC	0.414504	1.21961	-0.764311	-0.869806
Apl	0.277046	1.24301	-0.426205	-1.09385
Aplip1	-0.16389	0.791268	0.723189	-1.35057
Apoltp	1.45998	-0.162376	-0.659189	-0.638412
app	-0.477498	-0.972176	0.101904	1.34777
APP-BP1	-1.21478	1.20367	-0.188624	0.199731
Appl	1.49865	-0.469232	-0.469974	-0.559448
Aprt	-0.709142	-0.916264	1.22295	0.402455
Aps	-0.450548	-1.19112	0.696953	0.944717
apt	-1.21762	1.07921	0.483408	-0.344991
aqz	0.950751	0.569942	-0.205827	-1.31487
aralar1	1.04173	0.604526	-0.51147	-1.13479
Arc1	-1.15083	-0.491322	0.613869	1.02828
Arc2	-0.838793	-0.879385	1.01245	0.705726
Arc42	-0.12218	-0.234857	-1.0186	1.37564
Archease	-0.372232	-0.936189	1.40555	-0.0971252
Arf102F	-0.983001	-0.737289	0.787978	0.932311
Arf51F	-0.0857394	-1.26019	0.17355	1.17237
Arf79F	-1.2984	-0.27181	0.723813	0.846393
ArfGAP1	0.012704	1.23923	-1.20926	-0.0426716
ArfGAP3	1.24059	0.281898	-1.09477	-0.427718
Arfip	-1.25797	-0.32057	0.974804	0.603738
Arfrp1	0.393897	-0.884876	-0.739729	1.23071
arg	0.954128	0.77315	-0.871781	-0.855498
Argk	-0.604818	-0.340932	-0.544656	1.49041
Argl	-0.497343	-0.442613	1.49832	-0.558367
ArgRS-m	0.780398	0.944971	-0.793551	-0.931819
ari-1	-0.96526	-0.736551	0.65382	1.04799
ari-2	0.674818	0.920799	-1.25811	-0.337509
Arl1	-0.436389	-1.05403	0.203041	1.28738
Arl2	-0.820096	-0.834111	0.464129	1.19008
Arl4	-0.865744	-0.786459	0.460669	1.19153
Arl5	-1.02625	-0.689303	0.850409	0.865145
Arl6IP1	0.0205067	-0.334657	-1.03419	1.34834
arm	1.23753	0.297096	-1.08568	-0.448944
armi	1.12881	0.526571	-0.629728	-1.02565
Arp1	0.0195817	0.554344	-1.41116	0.837231
Arp10	0.703655	0.745342	-1.39515	-0.0538508
Arp2	-1.18518	1.14294	-0.358451	0.400693
Arp3	-1.07048	-0.309075	0.0545782	1.32498
Arp5	-0.228181	1.47053	-0.538169	-0.704175
Arp6	0.259176	1.2006	-0.268416	-1.19136
Arp8	1.17683	0.48168	-0.891382	-0.76713
Arpc1	-0.763796	-0.235277	-0.465395	1.46447
Arpc2	-0.795491	-0.879424	0.528316	1.1466
Arpc3A	-1.37791	0.386349	0.015947	0.975619
Arpc3B	-0.989128	-0.580406	0.308828	1.26071
Arpc4	-0.949972	-0.672872	0.406461	1.21638
Arpc5	-0.580574	-0.855369	0.0470355	1.38891
arr	0.666744	1.04449	-0.842998	-0.86824
Ars2	-0.890954	-0.839117	0.917529	0.812542
Art1	1.28549	0.274396	-0.61324	-0.94665
Art3	-0.0973901	0.227479	1.14539	-1.27548
Art4	0.627172	1.07516	-0.821734	-0.880595
Art7	0.151165	1.313	-1.03315	-0.431017
Art8	-1.04286	-0.129725	1.36351	-0.190923
Arts	0.350999	1.24322	-0.623294	-0.970928
aru	-0.848298	-0.665399	0.168633	1.34506
Arv1	-1.39901	0.97636	0.220696	0.201954
arx	0.153093	1.02198	0.200408	-1.37548
Asap	0.746924	0.950005	-1.07186	-0.625069
Asator	0.0905677	1.32591	-1.04775	-0.368727
Asciz	0.581837	-1.35357	-0.129649	0.901386
asf1	-0.186753	0.216166	-1.22259	1.19318
ash1	0.527037	0.976076	-1.31717	-0.185945
ash2	0.238563	1.02621	-1.37068	0.105901
asl	0.922579	0.745456	-0.516234	-1.1518
AsnRS-m	-1.41949	0.028805	0.788141	0.602542
asp	1.05185	0.655698	-0.799905	-0.907645
Asph	0.0565521	-1.20229	1.2418	-0.0960555
AspRS-m	0.610324	1.08689	-0.902995	-0.794217
asrij	-0.723349	-0.888217	1.24696	0.36461
asRNA:ASTR	-1.19478	1.25266	-9.65828e-05	-0.0577896
asRNA:CR17025	1.26055	-0.803447	-0.803447	0.346343
asRNA:CR31144	-0.89905	-0.805552	1.06439	0.640214
asRNA:CR31514	0.583719	1.10108	-0.959884	-0.724919
asRNA:CR31912	-0.92966	-0.543196	1.35125	0.121602
asRNA:CR32252	-0.574014	1.49108	-0.574014	-0.343055
asRNA:CR42254	0.0791286	-1.38363	0.990223	0.314276
asRNA:CR42547	1.37864	-1.01621	-0.159138	-0.20329
asRNA:CR42738	-0.807297	-0.61339	0.0164967	1.40419
asRNA:CR43159	-0.857871	-0.0708371	1.42033	-0.491625
asRNA:CR43257	-1.19076	-0.434174	0.620929	1.00401
asRNA:CR43425	-1.42288	0.117855	0.418031	0.886997
asRNA:CR43465	0.922425	-0.257598	0.632412	-1.29724
asRNA:CR43466	-0.865267	-0.865267	0.916506	0.814029
asRNA:CR43468	0.472671	-0.00159344	-1.39001	0.918936
asRNA:CR43474	-0.817486	-0.817486	1.22175	0.413218
asRNA:CR43629	-1.08808	1.32594	0.00287946	-0.240736
asRNA:CR43683	-0.982993	-0.73605	0.774666	0.944377
asRNA:CR43723	-1.01909	0.934896	0.778264	-0.694073
asRNA:CR43730	-0.0135128	1.39068	-0.446146	-0.931017
asRNA:CR43767	-0.865396	-0.865396	0.818693	0.912098
asRNA:CR43786	-0.751955	-0.751955	1.35951	0.144396
asRNA:CR43809	0.392987	1.23359	-0.834791	-0.79179
asRNA:CR43812	1.00217	0.716668	-0.810276	-0.908564
asRNA:CR43824	-1.01796	0.382057	-0.580823	1.21673
asRNA:CR43833	1.06095	0.644975	-0.812432	-0.893498
asRNA:CR43864	0.173244	-0.792737	1.34649	-0.726995
asRNA:CR43868	1.21395	0.420571	-0.734741	-0.899779
asRNA:CR43875	-0.0693166	1.435	-0.641521	-0.724164
asRNA:CR43889	-0.862007	-0.862007	0.979855	0.744159
asRNA:CR43906	0.785618	0.831245	-0.369846	-1.24702
asRNA:CR43916	1.04911	0.65958	-0.901787	-0.806906
asRNA:CR43933	1.1434	0.483767	-1.07317	-0.553992
asRNA:CR43944	0.349304	1.21292	-0.475702	-1.08652
asRNA:CR43957	1.04383	0.645601	-0.66231	-1.02712
asRNA:CR43964	0.541008	1.13843	-0.862445	-0.816992
asRNA:CR44019	-0.863587	-0.863587	0.955434	0.771739
asRNA:CR44021	0.378932	1.18385	-1.12327	-0.439519
asRNA:CR44029	0.370211	-0.624734	-0.977334	1.23186
asRNA:CR44030	-0.689046	-0.844752	0.203276	1.33052
asRNA:CR44031	0.922455	0.807639	-0.874632	-0.855462
asRNA:CR44047	-1.34835	0.868048	0.635817	-0.155516
asRNA:CR44049	0.740218	0.105979	0.597397	-1.44359
asRNA:CR44054	0.477441	0.280836	0.717604	-1.47588
asRNA:CR44064	1.01526	0.702604	-0.864048	-0.853819
asRNA:CR44065	1.49855	-0.482546	-0.456134	-0.559866
asRNA:CR44093	1.47582	-0.269051	-0.706924	-0.499839
asRNA:CR44095	0.786502	0.941447	-0.897044	-0.830906
asRNA:CR44114	-1.28565	-0.249156	0.998945	0.535857
asRNA:CR44116	-0.861923	-0.861923	0.74286	0.980987
asRNA:CR44119	-0.784847	-0.0809551	1.43356	-0.567763
asRNA:CR44124	0.223932	-1.00233	-0.516961	1.29536
asRNA:CR44134	1.03031	0.422683	-1.31988	-0.133108
asRNA:CR44137	-0.591993	-0.591993	-0.301925	1.48591
asRNA:CR44147	-0.824896	1.38148	-0.636176	0.0795909
asRNA:CR44160	1.46201	-0.534925	-0.734318	-0.192768
asRNA:CR44168	0.0798636	1.37611	-0.869421	-0.586554
asRNA:CR44169	0.857846	0.822148	-0.542522	-1.13747
asRNA:CR44179	-0.255254	1.4781	-0.64605	-0.576794
asRNA:CR44201	-1.2738	-0.268533	1.01191	0.530425
asRNA:CR44224	-0.695643	-0.0338513	-0.695643	1.42514
asRNA:CR44266	0.967893	0.757769	-0.86556	-0.860102
asRNA:CR44267	0.981118	0.742695	-0.866576	-0.857238
asRNA:CR44291	1.16705	0.321896	-0.283	-1.20594
asRNA:CR44321	-0.56298	-0.56298	-0.367668	1.49363
asRNA:CR44340	1.21656	-1.14094	-0.365974	0.290349
asRNA:CR44367	0.1641	1.35016	-0.714553	-0.799712
asRNA:CR44368	1.43828	-0.0885385	-0.75431	-0.595428
asRNA:CR44372	-0.891967	-0.814262	0.646032	1.0602
asRNA:CR44375	-1.40703	0.464504	0.0468154	0.895713
asRNA:CR44381	1.38979	-0.240304	-0.156363	-0.993122
asRNA:CR44382	1.32352	-0.926607	0.195838	-0.592748
asRNA:CR44386	-0.628502	1.48491	-0.299163	-0.557246
asRNA:CR44390	-0.0596414	1.41856	-0.505095	-0.853822
asRNA:CR44429	1.32059	-0.0906584	-0.119266	-1.11067
asRNA:CR44431	-0.246074	1.47699	-0.601616	-0.629297
asRNA:CR44512	-0.782366	-0.782366	0.257193	1.30754
asRNA:CR44690	0.993876	0.724283	-0.935203	-0.782955
asRNA:CR44704	0.760029	0.809329	-0.267039	-1.30232
asRNA:CR44793	1.37458	0.0795324	-0.573811	-0.880305
asRNA:CR44806	-0.820617	-0.820617	0.429239	1.21199
asRNA:CR44807	0.0666828	1.16366	0.0498729	-1.28022
asRNA:CR44841	-0.568959	1.4962	-0.401169	-0.526068
asRNA:CR44843	1.41362	-0.83505	-0.0275692	-0.551003
asRNA:CR44849	0.971525	0.75319	-0.889969	-0.834745
asRNA:CR44891	-1.22265	-0.371189	1.01738	0.576458
asRNA:CR44910	-0.864039	-0.864039	0.78113	0.946947
asRNA:CR44911	-1.08879	0.154395	-0.355651	1.29004
asRNA:CR44959	-0.619711	-0.619711	1.47523	-0.235811
asRNA:CR44960	0.196916	1.22125	-0.22733	-1.19084
asRNA:CR44961	-0.674454	-0.674454	1.44271	-0.0938069
asRNA:CR44962	-0.456295	1.49247	-0.400806	-0.635366
asRNA:CR44968	0.749221	0.485705	0.231135	-1.46606
asRNA:CR44969	0.649741	1.05807	-0.854839	-0.852975
asRNA:CR44972	-0.690161	-0.690161	-0.049675	1.43
asRNA:CR44976	-0.411071	-0.950159	1.38834	-0.0271074
asRNA:CR44981	-0.665776	1.48869	-0.442568	-0.38035
asRNA:CR44987	0.176442	1.34359	-0.824749	-0.695285
asRNA:CR44996	-0.84696	0.0400957	-0.585389	1.39225
asRNA:CR45000	0.178064	-1.28703	-0.0358296	1.1448
asRNA:CR45007	0.715025	1.00444	-0.8878	-0.83166
asRNA:CR45009	-0.999921	1.19269	-0.625098	0.432334
asRNA:CR45026	-1.02623	1.18237	0.439932	-0.59607
asRNA:CR45028	0.355809	1.23385	-0.58567	-1.00399
asRNA:CR45044	1.02642	0.689113	-0.852579	-0.862955
asRNA:CR45053	-0.841271	1.43617	-0.459822	-0.135077
asRNA:CR45108	1.49366	-0.599324	-0.376916	-0.51742
asRNA:CR45124	-0.816781	-0.816781	0.409671	1.22389
asRNA:CR45126	1.2741	0.304878	-0.925743	-0.653236
asRNA:CR45131	-0.685197	-0.685197	1.4342	-0.063808
asRNA:CR45132	-0.213528	1.17653	0.262308	-1.22531
asRNA:CR45135	-1.13297	-0.00670184	-0.160548	1.30022
asRNA:CR45136	-0.836666	-0.68528	1.34072	0.181222
asRNA:CR45139	1.17686	0.484571	-0.831312	-0.830122
asRNA:CR45140	-1.07953	0.722261	0.968931	-0.611663
asRNA:CR45141	0.451707	1.19743	-0.858399	-0.790739
asRNA:CR45142	0.466671	1.18815	-0.853072	-0.801746
asRNA:CR45145	1.21758	0.360612	-0.522547	-1.05565
asRNA:CR45160	0.459501	1.19216	-0.783301	-0.868361
asRNA:CR45164	-0.579608	-1.03001	0.412562	1.19705
asRNA:CR45171	-0.863168	1.42597	-0.103675	-0.459129
asRNA:CR45175	1.41315	-0.141371	-0.931113	-0.340665
asRNA:CR45182	-1.24554	0.455359	1.07667	-0.286486
asRNA:CR45189	-0.762479	1.34321	-0.762479	0.181747
asRNA:CR45190	1.13331	0.545993	-0.900831	-0.778468
asRNA:CR45195	0.851061	0.878605	-0.802087	-0.92758
asRNA:CR45198	1.40075	-0.0202705	-0.895936	-0.484544
asRNA:CR45202	-0.814195	-0.814195	1.23154	0.396855
asRNA:CR45208	0.900752	-1.35532	-0.125176	0.579739
asRNA:CR45210	-0.675588	-0.946565	1.21845	0.403702
asRNA:CR45214	1.21192	0.428649	-0.850185	-0.790381
asRNA:CR45264	0.622474	1.07907	-0.866618	-0.834928
asRNA:CR45275	0.880447	0.846866	-0.774707	-0.952606
asRNA:CR45350	0.597397	1.09439	-0.761205	-0.930585
asRNA:CR45366	-1.32566	-0.190135	0.927679	0.588118
asRNA:CR45367	0.508657	1.16085	-0.841412	-0.828089
asRNA:CR45396	-0.73546	-0.955454	0.603994	1.08692
asRNA:CR45397	-0.854461	1.05394	-0.854461	0.654977
asRNA:CR45445	-0.841391	-0.841391	0.551355	1.13143
asRNA:CR45466	-1.43494	0.0747401	0.608439	0.751765
asRNA:CR45467	-0.60616	-0.60616	-0.268562	1.48088
asRNA:CR45468	1.44548	-0.846538	-0.214038	-0.384903
asRNA:CR45479	-1.00231	-0.671518	0.568962	1.10486
asRNA:CR45485	0.155053	1.35487	-0.768222	-0.741701
asRNA:CR45501	-0.788909	-0.938172	0.918558	0.808523
asRNA:CR45518	-0.870577	0.0425654	1.38804	-0.560027
asRNA:CR45520	1.33599	0.197647	-0.770893	-0.762747
asRNA:CR45528	-0.716105	1.4487	-0.611349	-0.121251
asRNA:CR45549	-1.06531	0.0996189	1.31619	-0.350494
asRNA:CR45604	0.463136	1.18415	-0.708531	-0.938759
asRNA:CR45612	-0.825518	-0.825518	1.19571	0.45533
asRNA:CR45620	-1.28776	0.642381	0.923007	-0.277625
asRNA:CR45683	0.448161	1.18698	-0.654181	-0.980959
asRNA:CR45686	-0.242664	1.47647	-0.613902	-0.619902
asRNA:CR45714	0.845973	-1.43656	0.143266	0.447323
asRNA:CR45778	1.00121	0.643777	-0.483279	-1.16171
asRNA:CR45789	0.0405191	1.40008	-0.73538	-0.705223
asRNA:CR45798	0.106729	1.37475	-0.715487	-0.765993
asRNA:CR45804	-0.726847	-0.726847	1.39272	0.0609741
asRNA:CR45806	1.16039	0.509276	-0.824158	-0.845512
asRNA:CR45813	-1.08058	1.03759	0.635844	-0.592854
asRNA:CR45814	1.14594	0.530403	-0.85302	-0.823321
asRNA:CR45815	-0.961638	0.346566	1.24721	-0.632142
asRNA:CR45822	-0.804902	-0.804902	1.25686	0.352947
asRNA:CR45827	-0.693084	-0.693084	1.42743	-0.0412644
asRNA:CR45831	-0.74842	1.45392	-0.156382	-0.549118
asRNA:CR45835	-0.677365	-0.677365	1.44049	-0.0857567
asRNA:CR45865	-1.32191	0.143214	0.0710053	1.1077
asRNA:CR45871	-1.00778	0.899359	-0.710534	0.818951
asRNA:CR45873	-1.44446	0.700105	0.10166	0.642694
asRNA:CR45874	0.735364	-0.587712	0.951584	-1.09924
asRNA:CR45889	-0.862423	-0.862423	0.750822	0.974023
asRNA:CR45891	-0.804922	1.25681	-0.804922	0.353037
asRNA:CR45895	0.145945	1.3341	-0.512425	-0.967622
asRNA:CR45896	-0.785841	-0.785841	1.30053	0.271149
asRNA:CR45907	-1.43574	0.091619	0.555996	0.788121
asRNA:CR45908	-0.865968	-0.865968	0.880057	0.85188
asRNA:CR45912	1.24207	0.378871	-0.810848	-0.810091
asRNA:CR45925	-0.275508	1.46926	-0.759408	-0.434348
asRNA:CR45926	0.961069	0.733629	-0.621366	-1.07333
asRNA:CR45928	0.576892	1.05807	-0.492575	-1.14239
asRNA:CR45929	0.660003	1.0499	-0.865158	-0.844749
asRNA:CR45943	1.46837	-0.410244	-0.288463	-0.769663
asRNA:CR45952	-1.19221	-0.448933	0.69725	0.943894
asRNA:CR45968	-0.00825358	1.41694	-0.707427	-0.701258
asRNA:CR45969	-0.820232	-0.820232	0.427246	1.21322
asRNA:CR45970	-0.661482	-0.661482	1.45198	-0.129013
asRNA:CR45999	1.02942	0.685377	-0.869423	-0.845373
asRNA:CR46020	1.32335	0.0699105	-1.06626	-0.327001
asRNA:CR46033	-0.549392	-0.549392	1.49614	-0.39736
asRNA:CR46044	-1.1306	0.275278	-0.372402	1.22772
asRNA:CR46048	-0.0967719	0.503625	0.948579	-1.35543
asRNA:CR46050	-1.15128	1.28996	-0.0912842	-0.0473959
asRNA:CR46055	-1.25294	-0.350951	0.903827	0.700059
asRNA:CR46067	0.371821	1.24581	-0.834695	-0.782936
asRNA:CR46081	-0.942684	1.38256	0.00715004	-0.447024
asRNA:CR46089	1.35066	-0.0897222	-0.198799	-1.06214
asRNA:CR46093	-0.423947	-0.501606	1.49727	-0.571713
asRNA:CR46096	-0.837812	-0.837812	1.14788	0.527745
asRNA:CR46097	0.56638	1.12036	-0.816204	-0.870533
asRNA:CR46099	-0.960054	-0.658369	1.2186	0.399821
asRNA:CR46104	0.694303	1.02214	-0.851324	-0.865116
asRNA:CR46109	0.427639	-1.46305	0.782819	0.252592
ast	1.28947	0.256236	-0.969053	-0.576658
AstA	-1.40507	0.911945	0.437003	0.0561261
AstA-R1	1.28648	-0.792443	-0.792443	0.298411
asun	0.600462	1.07855	-0.656987	-1.02203
Asx	1.28656	0.283454	-0.91136	-0.658658
Atac1	-1.2607	-0.248855	0.431242	1.07831
Atac2	-1.40052	0.244995	0.972032	0.183495
Atac3	1.28634	0.287604	-0.677486	-0.896455
ATbp	0.908536	0.812804	-0.987963	-0.733377
Ate1	1.26217	0.299834	-1.00135	-0.560655
Atet	0.588777	1.09764	-0.958399	-0.728015
Atf-2	0.0111688	0.692238	-1.41784	0.714432
Atf3	0.467834	1.10592	-0.387043	-1.18671
Atf6	-0.77986	-0.47248	-0.205816	1.45816
Atg1	0.232396	1.03229	-1.36741	0.10272
Atg10	0.287803	1.28678	-0.891462	-0.683123
Atg101	1.35583	-0.00117256	-1.02673	-0.327934
Atg12	-0.845544	-0.678812	0.186662	1.33769
Atg13	0.415399	0.217322	-1.45215	0.819432
Atg14	0.659653	1.04801	-0.918891	-0.788775
Atg16	1.01514	0.279522	-1.37303	0.0783727
Atg17	0.663552	-1.39124	-0.0600675	0.787751
Atg18a	0.528677	0.664688	-1.48173	0.288368
Atg18b	-0.78988	-0.358001	-0.317437	1.46532
Atg2	0.721126	0.999689	-0.860535	-0.860279
Atg3	-0.881955	-0.600138	0.12311	1.35898
Atg4a	-1.30381	0.138816	0.0337675	1.13123
Atg4b	1.01628	0.700868	-0.887333	-0.829817
Atg5	-1.03899	-0.583487	0.448027	1.17445
Atg6	0.0375976	1.40107	-0.738351	-0.700313
Atg7	-0.155953	0.570782	-1.33963	0.924805
Atg8a	-0.867002	-0.784906	0.460011	1.1919
Atg9	1.40769	-0.36565	-0.934419	-0.107617
atilla	-0.978047	-0.67316	0.488676	1.16253
atl	-0.464074	1.49916	-0.490765	-0.544325
atms	0.968876	0.481172	-0.101151	-1.3489
Atox1	0.570361	1.04644	-1.1776	-0.439205
ATP7	0.77372	0.912765	-1.11352	-0.572962
ATP8A	-0.734115	-0.53766	-0.189731	1.46151
ATP8B	0.216537	1.3107	-0.577929	-0.949305
Atpalpha	0.654829	0.977095	-1.19338	-0.43854
ATPCL	0.656999	1.00216	-0.523275	-1.13588
ATPsynC	-0.741338	-0.808312	1.32088	0.228774
ATPsynE	-0.464741	-0.418654	1.49492	-0.611524
ATPsynepsilonL	1.3598	-0.516602	0.0924854	-0.935685
ATPsynF	-0.792187	-0.826707	1.24453	0.374368
ATPsynGL	-0.863366	0.959275	-0.863366	0.767457
AttA	-0.47983	-0.575036	1.49767	-0.442805
AttB	-0.45117	-0.595746	1.49647	-0.449556
AttD	-1.35252	0.64743	0.854018	-0.148929
Atu	0.815441	0.909609	-0.763105	-0.961945
Atx-1	-0.990307	0.89797	0.823562	-0.731225
Atx2	-0.279347	-0.450157	-0.742776	1.47228
Atxn7	1.34589	0.147708	-0.907001	-0.586601
aub	1.02209	0.692984	-0.810918	-0.904161
aurA	0.649408	1.02659	-0.593134	-1.08286
aurB	0.177922	0.985714	0.230489	-1.39413
aux	0.319115	1.27526	-0.776543	-0.817834
ave	-0.558507	-0.636948	-0.287657	1.48311
Aven	-0.57099	1.46187	-0.710073	-0.18081
awd	-0.701512	-0.893559	1.26514	0.329932
axed	-0.61796	-0.521296	-0.351627	1.49088
Axn	-0.396385	1.4888	-0.668001	-0.424415
Axs	-0.73891	-0.60662	-0.09561	1.44114
Axud1	-0.303263	-1.0685	0.0434316	1.32833
az2	-0.805993	1.44539	-0.151153	-0.488243
b	0.321679	1.27406	-0.805491	-0.790245
B4	-1.19624	-0.43691	0.667358	0.965792
B52	-0.226507	-1.31709	0.878166	0.665429
B9d1	-0.839069	1.43961	-0.447152	-0.153393
bab1	0.0835153	1.38288	-0.785741	-0.680651
bab2	-0.811228	-0.811228	0.38249	1.23997
babo	-0.77135	-0.931632	0.642917	1.06007
babos	-0.812532	-0.812532	1.2363	0.38876
Bacc	0.609738	-1.08308	1.05616	-0.582816
baf	-1.02161	-0.548012	1.24532	0.324303
bai	-1.15392	-0.511232	0.934387	0.730769
Baldspot	-1.29331	-0.278807	0.869242	0.702875
ball	0.758455	0.320084	0.393648	-1.47219
bam	0.312972	1.24687	-0.524191	-1.03565
Bap170	0.807343	0.921885	-0.824552	-0.904676
Bap55	0.845901	-0.87762	0.88584	-0.854121
Bap60	1.05802	0.633673	-0.690722	-1.00097
barc	-0.626982	-1.06514	0.988748	0.703378
barr	0.915618	0.814969	-0.863791	-0.866796
baz	0.954989	0.752688	-0.675825	-1.03185
bb8	-1.01045	-0.625915	1.1706	0.465766
bbc	-0.653494	-0.89386	1.31071	0.236643
bbg	-0.668409	-0.754566	1.40842	0.0145541
bc10	-0.323657	-0.661838	-0.500131	1.48563
BCAS2	-0.90648	-0.776485	1.1236	0.559366
bchs	0.122601	1.36053	-0.611033	-0.872101
BCL7-like	-0.350423	1.48949	-0.499183	-0.639881
bcn92	-1.01536	-0.687158	0.697051	1.00547
Bdbt	-0.677951	-0.974822	0.491518	1.16126
bdg	-1.44811	0.738899	0.584291	0.124922
bdl	-0.823612	1.2022	-0.823612	0.445025
Bdp1	1.49577	-0.404263	-0.503665	-0.587843
be	0.754882	0.932428	-1.10559	-0.581716
BEAF-32	1.44209	-0.294433	-0.277927	-0.869733
beag	-0.966157	-0.754483	0.768136	0.952504
beat-Ib	-0.821375	-0.821375	1.20956	0.433191
beat-Ic	-0.861499	-0.861499	0.736442	0.986556
beat-IIIc	-0.517594	-0.517594	-0.464339	1.49953
beat-VI	-0.5	-0.5	-0.5	1.5
beg	0.6734	-1.16366	0.977336	-0.487075
bel	0.580147	0.189438	0.694887	-1.46447
Bem46	0.639052	-1.05036	-0.63213	1.04344
ben	0.418719	1.16283	-1.12383	-0.457717
Best1	-1.01863	-0.582716	1.2134	0.38794
Bet1	-0.319319	-1.17047	0.287572	1.20222
Bet3	1.08236	0.241634	-1.33044	0.0064499
Bet5	1.12079	-1.12784	-0.482159	0.489211
beta-Man	1.31026	0.225073	-0.931868	-0.603469
beta-PheRS	1.16097	-1.18271	0.366605	-0.344865
beta-Spec	0.869182	0.839558	-0.654663	-1.05408
beta'COP	1.07115	0.632234	-0.818927	-0.88446
beta3GalTII	-0.836318	-0.887304	0.979763	0.743859
beta4GalNAcTA	-0.174819	1.43995	-0.851336	-0.41379
beta4GalNAcTB	1.42263	-0.119348	-0.88894	-0.414338
beta4GalT7	1.46923	-0.236697	-0.729797	-0.502734
betaCOP	1.00834	0.663103	-1.10655	-0.564888
betaggt-I	-0.606862	-0.868393	0.109367	1.36589
betaggt-II	1.0757	0.588458	-1.0686	-0.59556
betaGlu	0.938744	0.782683	-0.750008	-0.971419
betaTub56D	0.267492	-1.30185	1.10823	-0.0738632
betaTub60D	-0.994013	-0.629685	0.426338	1.19736
betaTub85D	-1.03247	-0.636346	0.573056	1.09576
betaTub97EF	-0.798389	-0.603696	-0.011419	1.4135
Bgb	0.954618	0.0941447	-1.39899	0.350229
bgm	-0.543071	-0.227337	1.47071	-0.700297
BHD	1.47101	-0.692892	-0.552302	-0.225816
BI-1	-0.710662	0.878518	-1.00834	0.840485
bib	1.13353	0.547251	-0.800862	-0.879916
bic	-0.752306	-0.760491	1.35281	0.159987
BicD	-0.701401	-0.906422	0.360127	1.2477
bif	-0.963521	-0.659808	0.412488	1.21084
bigmax	-1.49003	0.40317	0.428005	0.658851
Bin1	-0.895401	-0.80406	0.617718	1.08174
bin3	-0.525925	-0.959592	1.33403	0.151488
bip1	-0.294836	-1.24228	1.07552	0.461594
bip2	-0.757442	-0.870288	0.399059	1.22867
Bka	-0.676102	-0.924227	1.25192	0.348411
blanks	0.103789	-0.979164	-0.469871	1.34525
Blimp-1	-0.5	-0.5	-0.5	1.5
Blm	0.114623	1.30076	-0.324795	-1.09059
Blos1	-0.822556	-0.89405	0.699072	1.01753
Blos2	-1.04663	-0.133699	-0.181228	1.36156
Blos3	-0.33584	-0.497499	-0.653957	1.4873
Blos4	0.456031	-1.23333	-0.307359	1.08465
blot	-0.59289	-0.59289	1.48562	-0.299838
blow	0.522965	1.15052	-0.872209	-0.801281
blp	-0.17466	-1.27099	1.11597	0.329681
blw	-0.456428	-0.837509	1.43852	-0.144585
bma	0.807581	0.922398	-0.847957	-0.882023
Bmcp	-1.192	0.144428	-0.186696	1.23427
bmm	-0.37459	1.11838	0.444289	-1.18808
bnl	-1.10567	1.20059	-0.454637	0.359712
boca	-0.400818	-1.21333	0.986561	0.627589
BOD1	1.32912	0.0761136	-0.355982	-1.04925
boi	0.254171	1.27833	-1.01822	-0.514289
bol	-0.744651	-0.977674	0.804391	0.917934
bon	0.679742	1.03207	-0.917677	-0.794135
bonsai	-0.877792	-0.659107	1.32254	0.214359
bor	0.182928	-0.0999281	1.17364	-1.25664
bora	0.0783372	1.34601	-0.422566	-1.00178
BORCS5	0.654535	0.1664	-1.46093	0.639992
BORCS6	-0.22485	-0.210121	-0.967987	1.40296
BORCS7	-1.03721	-0.334362	0.0255593	1.34601
borr	0.694566	1.02182	-0.873753	-0.84263
botv	0.994655	0.707919	-1.02468	-0.677893
bou	1.06678	0.634837	-0.775909	-0.925706
bowl	-0.851837	-0.66649	0.177137	1.34119
BoYb	0.0644483	1.39142	-0.727937	-0.727937
br	0.682131	1.03202	-0.841606	-0.872544
Br140	0.39029	1.23513	-0.836542	-0.788877
brat	0.530023	0.364093	0.598597	-1.49271
Brca2	0.199085	-0.0411758	-1.29267	1.13476
Brd8	1.41464	-0.721808	-0.691221	-0.00161056
Bre1	-0.652585	-0.427912	-0.410354	1.49085
Brf	1.11965	0.534146	-0.610633	-1.04317
brk	0.088576	-1.38222	0.296906	0.996735
brm	0.924662	0.804864	-0.89274	-0.836785
Brms1	-0.634516	-0.910363	0.236108	1.30877
brn	1.35889	-0.608287	-0.876154	0.125552
brp	-0.714622	-0.879335	1.26907	0.32489
Bruce	0.864355	0.84691	-0.666659	-1.04461
BRWD3	0.623219	1.00728	-0.449387	-1.18111
brwl	1.21095	0.224818	-1.19346	-0.242308
bs	1.09521	0.485847	-1.18713	-0.393926
bsf	0.365783	0.883996	0.182507	-1.43229
Bsg	0.592719	0.992188	-1.24427	-0.340634
Bsg25D	0.64324	0.819323	-1.38144	-0.0811257
bsk	-0.695965	0.62056	-0.993727	1.06913
bt	1.26574	0.33039	-0.884474	-0.711655
BTBD9	1.36529	0.0380544	-0.975406	-0.427935
BtbVII	0.806648	0.916415	-0.749665	-0.973399
BthD	0.00627262	0.109828	1.16284	-1.27894
Btk29A	1.0507	0.656777	-0.794787	-0.912686
btl	-0.634304	-0.323594	-0.529555	1.48745
btsz	1.41014	0.0120583	-0.71619	-0.706004
btz	1.4645	-0.295535	-0.378716	-0.790245
Bub1	0.602151	1.09235	-0.781971	-0.912529
Bub3	0.491462	0.735182	0.242729	-1.46937
BubR1	0.700486	1.00839	-0.727243	-0.981628
bug	-1.32899	1.07411	-0.026845	0.281722
Bug22	0.19905	-1.46785	0.655409	0.613387
BuGZ	1.36865	0.110565	-0.840921	-0.638295
bun	0.919428	0.709723	-0.412158	-1.21699
bur	-0.909113	-0.816998	0.772782	0.953329
bves	-0.669738	-0.496841	-0.317862	1.48444
bw	1.03646	0.676118	-0.823441	-0.889136
bwa	0.267074	1.30202	-0.81903	-0.750066
Bx	0.236803	1.31414	-0.691023	-0.859917
Bx42	0.933923	0.743778	-1.12802	-0.549676
by	1.35616	-0.182245	-1.05524	-0.118675
bys	0.677492	0.883537	-0.259956	-1.30107
c(2)M	-0.421344	1.33315	0.105121	-1.01692
c(3)G	-1.15826	0.0937652	1.26813	-0.203636
c11.1	0.0765817	1.05336	-1.35434	0.224398
c12.1	-0.875488	-0.853973	0.93082	0.79864
c12.2	0.861805	-1.42799	0.113037	0.453152
C1GalTA	0.676059	0.888756	-1.29657	-0.268242
C3G	-1.33703	-0.194921	0.744323	0.787624
ca	0.361688	1.24434	-0.927764	-0.678267
Ca-alpha1D	0.375353	1.21296	-1.04562	-0.542695
Ca-alpha1T	0.175613	-1.4427	0.839748	0.427334
Ca-Ma2d	-0.5	-0.5	-0.5	1.5
CaBP1	-0.0863787	-1.38032	0.80968	0.657019
cac	0.886103	0.82563	-0.671284	-1.04045
cact	-0.69687	0.542246	1.12812	-0.973494
cactin	1.02469	-1.24527	0.543296	-0.322712
Cad86C	-0.863652	-0.0857853	1.42236	-0.472918
Cad87A	1.37604	0.104137	-0.730309	-0.749871
Cad96Ca	-0.5	-0.5	-0.5	1.5
Cad99C	-0.725651	-0.725651	1.39413	0.0571749
CadN	-0.709951	-0.709951	0.0085681	1.41133
Caf1-105	-1.16531	-0.0880431	-0.0247974	1.27815
Caf1-180	-1.05665	-0.624428	0.639833	1.04125
Caf1-55	0.301662	0.626206	-1.4853	0.557437
cag	-0.86884	-0.736035	0.34661	1.25826
CAH1	-0.670373	-0.104999	-0.670373	1.44574
CAH13	-1.24105	1.17998	0.211615	-0.15055
CAH2	-0.400563	1.49618	-0.527708	-0.567909
CAH3	0.557572	1.12498	-0.777809	-0.904739
CAH7	-0.520959	-0.520959	-0.45741	1.49933
CAHbeta	1.10138	0.587168	-0.935374	-0.753174
cal1	-0.47144	-1.15543	0.569134	1.05774
CalpA	-0.590904	-0.344887	-0.555343	1.49113
CalpB	0.833011	0.8748	-0.650794	-1.05702
CalpC	-0.179313	0.747204	0.776309	-1.3442
Cals	-0.597946	-0.0518917	-0.777039	1.42688
Calx	1.09106	0.592633	-0.698746	-0.984949
calypso	0.138489	1.02674	-1.37247	0.207242
Cam	-0.943723	-0.652358	0.345228	1.25085
CaMKI	-0.868017	-0.333948	-0.239453	1.44142
CaMKII	-0.945759	-0.754096	1.06455	0.635306
Camp	0.274497	1.15307	-1.25049	-0.177084
Camta	-0.436514	1.29043	-1.05132	0.197401
cana	0.693184	0.808068	-0.142496	-1.35876
CanA-14F	0.700633	0.994659	-1.05107	-0.644224
CanB2	0.34665	0.646635	-1.48871	0.495424
Cand1	-0.116548	-1.35368	0.54382	0.926407
CAP	-0.887847	-0.784569	0.52181	1.15061
Cap-D2	0.737961	0.979771	-0.758472	-0.959261
Cap-D3	1.40152	-0.000541143	-0.865356	-0.535625
Cap-G	0.846085	0.883615	-0.925817	-0.803883
Cap-H2	0.505262	1.16163	-0.778409	-0.888484
Caper	0.461371	1.16786	-0.5955	-1.03374
Capr	0.685052	1.013	-1.0263	-0.671756
caps	1.45717	-0.153005	-0.689572	-0.614595
capt	-1.00813	-0.186733	-0.188364	1.38323
capu	-0.889312	-0.797397	0.568774	1.11793
car	1.40747	-0.211492	-0.957931	-0.238047
CARPB	-0.401793	1.49631	-0.529659	-0.564862
CarT	-0.498704	1.49334	-0.612617	-0.382016
CASK	1.10078	0.400386	-1.2512	-0.249963
casp	-1.08399	-0.233261	-0.0133083	1.33056
Cat	1.04702	0.644463	-1.01583	-0.67565
cathD	0.856758	0.817862	-1.14947	-0.525147
Catsup	0.453772	1.17011	-0.581227	-1.04265
cav	0.462416	0.591484	0.442835	-1.49673
caz	0.818091	0.892028	-0.664321	-1.0458
cbc	-1.33464	1.02414	-0.0913984	0.401892
Cbl	-0.138343	1.40089	-0.963952	-0.298597
CBP	0.478983	1.18049	-0.822926	-0.836547
Cbp20	-0.730576	-0.980729	0.713973	0.997332
Cbp80	0.631201	1.05943	-0.687097	-1.00354
cbs	0.36643	1.13809	-1.22061	-0.283908
Cbs	0.61437	0.844103	-0.0786716	-1.3798
cbt	1.38706	-0.112877	-0.282438	-0.991743
Cby	-0.983455	-0.594671	0.323261	1.25486
Cc2d2a	1.45021	-0.664077	-0.664077	-0.122056
CCAP	-1.28028	0.967999	0.589215	-0.276936
CCDC53	0.533967	0.4787	-1.49956	0.486888
Ccdc56	-0.919694	-0.81027	0.889869	0.840095
Ccdc58	-0.790774	-0.749692	1.32975	0.210716
Ccdc85	-0.374605	1.34165	-1.0276	0.0605522
CCHa2	0.212602	-1.14885	-0.305398	1.24164
Cchl	-0.4135	-0.81923	1.45245	-0.219718
Ccm3	-0.633552	-0.8712	0.157614	1.34714
Ccs	-0.949922	-0.557512	0.183345	1.32409
CCT2	-1.12168	-0.53163	0.611624	1.04169
CCT4	-0.939395	-0.754443	0.608372	1.08547
CCT8	-0.782414	-0.851927	0.41312	1.22122
Ccz1	0.140174	-0.00803463	-1.28499	1.15286
CD98hc	-0.619575	-0.931363	1.29796	0.25298
Cda5	0.986898	-1.01107	-0.696253	0.720422
CDase	1.20937	0.43321	-0.84041	-0.802167
cdc14	0.277232	1.28766	-0.924982	-0.63991
Cdc16	0.532634	1.06544	-1.18905	-0.40903
Cdc23	-0.268605	1.48043	-0.636869	-0.574957
Cdc27	1.17877	0.473051	-0.931929	-0.719889
Cdc37	-0.612939	-1.07492	0.992968	0.694889
Cdc42	0.702747	1.01516	-0.856975	-0.860929
CDC45L	-0.177175	1.44396	-0.431894	-0.834893
Cdc5	0.828939	0.898427	-0.946725	-0.780641
CDC50	0.541752	0.953961	-1.33004	-0.165671
Cdc6	-0.641452	-0.439249	-0.411395	1.4921
Cdep	0.419709	1.14665	-1.15887	-0.407489
CdGAPr	1.0049	0.656854	-1.1292	-0.532555
cdi	1.19379	0.450742	-0.920889	-0.723643
Cdk1	-0.46049	0.191003	1.29989	-1.03041
Cdk12	-1.20756	-0.372553	0.51201	1.0681
Cdk2	0.749271	0.961756	-0.697697	-1.01333
CDK2AP1	1.40312	-0.956749	-0.313323	-0.133052
Cdk4	1.07539	0.624097	-0.779355	-0.920132
Cdk5	-0.961502	-0.499196	0.114112	1.34659
Cdk5alpha	-0.772709	-0.772709	0.219678	1.32574
Cdk7	-0.972973	1.27881	0.27789	-0.583729
Cdk8	0.345227	1.12303	-1.25458	-0.213673
Cdk9	0.963902	0.141423	-1.4012	0.295871
Cdlc2	-0.788642	1.29469	0.282593	-0.788642
cdm	0.583408	1.10757	-0.805267	-0.885707
Cec2	-1.23643	0.0411353	1.21213	-0.0168391
CecA1	-0.699757	-0.644915	1.44381	-0.0991405
CecA2	-0.66375	-0.584106	1.47236	-0.224506
CecB	-0.837313	-0.680186	1.34392	0.173577
CecC	-1.17798	-0.0373022	1.26814	-0.0528557
Ced-12	0.559805	0.123637	-1.44576	0.762314
ced-6	0.075707	0.377662	0.945678	-1.39905
Cen	0.760501	0.96124	-0.948786	-0.772956
CenB1A	-1.04251	-0.499271	0.283363	1.25842
CenG1A	-0.890519	-0.781679	0.521591	1.15061
Cenp-C	0.947739	0.770169	-0.987458	-0.730451
Cep135	1.32527	0.157997	-0.498072	-0.985198
cep290	-0.839827	-0.839827	1.13879	0.540861
Cep89	-0.831011	-0.831011	0.486275	1.17575
Cep97	1.4068	-0.0490879	-0.898881	-0.458828
cer	-0.010325	0.706649	-1.41073	0.714408
Cerk	0.164449	0.174687	-1.3706	1.03146
cert	0.187529	0.921163	-1.42086	0.312167
cerv	-1.38876	0.911979	-0.0125748	0.48936
Cf2	0.658127	-0.942165	-0.763203	1.04724
Cfp1	-1.42099	0.76511	0.0276801	0.628198
cg	-0.755251	-0.286546	-0.429054	1.47085
CG10005	-0.825568	-0.825568	0.455603	1.19553
CG10011	-0.853381	0.489261	-0.809422	1.17354
CG10026	1.31449	0.235958	-0.860369	-0.690079
CG10031	-1.47684	0.71778	0.291113	0.467951
CG10038	0.0433895	-1.34749	0.244594	1.05951
CG10041	-0.804767	1.35924	0.141742	-0.696218
CG10050	-0.817972	-0.860451	0.537556	1.14087
CG10053	-1.18999	0.0479599	-0.110713	1.25274
CG10055	-0.8518	-0.857196	1.05365	0.65535
CG10063	0.701441	0.998417	-1.03212	-0.66774
CG10068	-0.0337795	1.39869	-0.918093	-0.446813
CG10075	-0.628192	-1.06561	0.713895	0.979904
CG10077	0.663849	0.947062	-1.23258	-0.378335
CG10082	0.18797	-1.25344	1.17536	-0.109886
CG10086	-0.865032	-0.865032	0.923678	0.806386
CG10096	-0.866025	-0.866025	0.865986	0.866065
CG10098	-0.750129	0.0404314	1.3998	-0.690101
CG10103	-1.13845	-0.530051	0.709706	0.958797
CG10126	-0.875896	0.373077	-0.740358	1.24318
CG10132	-0.187645	1.46553	-0.654831	-0.623056
CG10137	0.770081	0.920399	-0.589329	-1.10115
CG10139	0.595191	-1.40046	-0.0217541	0.827027
CG10147	-0.194214	-0.415775	-0.835919	1.44591
CG10165	-1.07182	-0.555321	1.14451	0.482629
CG10166	-1.39227	-0.0552032	0.64969	0.797779
CG10171	0.69883	1.01802	-0.885499	-0.831356
CG10184	-1.00097	-0.692714	0.642019	1.05167
CG10188	-0.183814	1.46376	-0.59262	-0.687327
CG10189	-1.15877	-0.0789825	-0.0463242	1.28408
CG10194	-1.08945	0.456829	1.15426	-0.52164
CG10195	-1.30619	-0.213355	0.543159	0.976385
CG10208	1.23009	0.354322	-0.561819	-1.02259
CG10209	0.483417	0.29634	-1.47948	0.699727
CG10214	-0.363304	-1.13358	1.22942	0.267459
CG10222	-1.02963	-0.623076	1.13124	0.521464
CG10232	-0.951613	-0.432106	0.00251983	1.3812
CG1024	1.30508	0.205056	-0.994317	-0.515814
CG10252	1.43796	-0.262555	-0.881426	-0.29398
CG10254	1.16682	-1.04208	-0.584295	0.459551
CG10265	-0.379174	-0.735582	1.47765	-0.362895
CG10268	-1.42869	0.214999	0.903566	0.310128
CG10274	1.33473	0.200043	-0.786511	-0.748258
CG10283	-0.973544	0.546684	-0.698229	1.12509
CG10286	0.976932	0.326766	0.0860589	-1.38976
CG10311	-0.296703	-0.680364	-0.504377	1.48144
CG10321	0.611417	1.07123	-1.0188	-0.663841
CG10324	-0.21785	-1.32444	0.838513	0.703776
CG10333	-0.785798	-0.912458	1.0814	0.616853
CG10336	-0.412287	1.49552	-0.599617	-0.483619
CG10337	0.0692147	0.902859	0.437973	-1.41005
CG10338	-0.00376704	1.41511	-0.678424	-0.732924
CG10340	-0.736044	-0.901077	1.20985	0.427269
CG10341	0.526872	-1.23486	1.04207	-0.334086
CG10343	-1.14325	-0.532345	0.891565	0.784029
CG10344	-1.03007	0.0736902	-0.38093	1.33731
CG10347	-0.672408	-1.00549	1.09309	0.584805
CG10353	-0.306899	0.0178351	1.34113	-1.05207
CG10359	-0.560242	-0.628603	-0.295608	1.48445
CG10365	0.880344	0.839698	-0.717487	-1.00255
CG10366	1.17985	0.415474	-0.512368	-1.08296
CG10375	-1.0171	-0.698915	0.906311	0.809706
CG10376	-0.952563	-0.337738	1.40216	-0.111857
CG10383	1.06849	-0.107432	0.351624	-1.31268
CG10395	-0.669289	-1.02365	0.657855	1.03509
CG10405	1.29668	0.134888	-0.344468	-1.0871
CG10407	0.820341	0.821531	-0.430901	-1.21097
CG10413	0.907262	0.823776	-0.862192	-0.868846
CG10417	-0.977312	-0.638865	0.401455	1.21472
CG10418	-0.942429	-0.558863	1.33054	0.17075
CG10425	-0.514092	0.934782	-1.15199	0.731303
CG10428	1.44316	-0.502538	-0.803749	-0.136872
CG10431	0.305122	1.28293	-0.79024	-0.797814
CG10433	-0.740616	-0.122247	-0.58451	1.44737
CG10435	-1.08758	-0.609526	0.901321	0.795783
CG10444	-0.562956	-0.176438	-0.720853	1.46025
CG10445	-0.500512	0.229802	-1.01791	1.28862
CG10462	1.24082	-0.489609	-1.06062	0.309411
CG10463	-0.4449	-0.834138	1.44211	-0.163073
CG10465	-0.896871	-0.0965169	-0.423333	1.41672
CG10466	-1.11771	-0.482776	0.456107	1.14438
CG10467	-0.213263	1.46588	-0.72924	-0.523377
CG10469	0.14447	1.35858	-0.795269	-0.707777
CG10470	-1.2149	-0.326218	1.10973	0.43139
CG10472	1.1814	0.22459	-0.171272	-1.23472
CG10492	0.952937	0.771677	-0.7942	-0.930415
CG10494	1.30483	0.241317	-0.921214	-0.624936
CG10495	1.49734	-0.460217	-0.583195	-0.45393
CG10505	0.802641	0.925922	-0.817	-0.911563
CG10508	0.89871	0.832699	-0.861027	-0.870383
CG10512	0.84576	0.866718	-0.672934	-1.03954
CG10516	-0.820823	-0.891022	0.672728	1.03912
CG10527	-0.700028	-0.991349	0.625676	1.0657
CG10543	0.815107	0.85475	-1.15958	-0.510282
CG10550	-0.564259	-0.564259	-0.36484	1.49336
CG10555	1.41602	-0.878243	-0.0701635	-0.467611
CG10561	1.4702	-0.404013	-0.764282	-0.301908
CG10565	0.798357	0.470154	0.183369	-1.45188
CG10576	0.0721393	-0.298868	1.31332	-1.08659
CG10581	0.875918	0.854662	-0.815954	-0.914626
CG10584	-0.0548597	-0.857866	-0.503981	1.41671
CG10589	1.49888	-0.472135	-0.554326	-0.472417
CG10600	-1.33205	0.876888	-0.192612	0.647773
CG10616	-0.370341	-0.593163	-0.529889	1.49339
CG10621	-0.957776	0.318544	-0.622957	1.26219
CG10623	0.589521	1.10186	-0.782563	-0.908822
CG10628	1.20973	0.428231	-0.742434	-0.895526
CG10631	1.01972	0.695136	-0.800086	-0.914774
CG10638	1.40584	-0.275422	-0.95817	-0.172248
CG10646	-1.07138	-0.0737979	-0.199098	1.34427
CG10654	0.524509	1.15007	-0.844629	-0.829953
CG10660	0.216271	0.434707	-1.45517	0.804195
CG10663	-0.547647	-0.493986	-0.457335	1.49897
CG10669	1.20571	0.0876717	-1.23921	-0.0541687
CG10672	0.457687	-1.30605	-0.177854	1.02622
CG10674	-1.24706	-0.369822	0.829689	0.787197
CG10681	-0.987272	0.423062	-0.636357	1.20057
CG10702	1.09246	0.604802	-0.862862	-0.834398
CG10731	-1.3323	0.950202	-0.161862	0.54396
CG10734	-0.695713	-0.695713	-0.0336473	1.42507
CG10737	-0.434407	-0.00191225	-0.947194	1.38351
CG1074	-0.596308	-0.961877	1.28171	0.27648
CG10747	0.192707	1.26202	-1.12236	-0.33237
CG10764	-1.26996	-0.066404	0.173284	1.16308
CG1077	-0.558188	-0.558188	1.49459	-0.378215
CG10778	-1.28671	-0.280874	0.919508	0.648073
CG10795	1.15581	0.0131341	-1.28473	0.11579
CG10799	-0.634855	-0.634855	1.46787	-0.198163
CG10801	-0.557651	-0.557651	1.49469	-0.379392
CG10802	0.327785	1.27029	-0.767425	-0.83065
CG10803	0.730141	0.982912	-0.98595	-0.727104
CG10809	-1.39784	-0.0148989	0.861147	0.55159
CG10841	-0.834002	-0.834002	0.50403	1.16397
CG10859	0.976901	0.747534	-0.865449	-0.858985
CG10863	0.0314074	-0.134988	-1.16793	1.27151
CG10866	1.44681	-0.165783	-0.811901	-0.469125
CG10874	0.137282	-0.561445	-0.922814	1.34698
CG10877	1.04613	0.662388	-0.914767	-0.793755
CG10889	0.0221942	1.34636	-1.03808	-0.330479
CG10898	0.122447	-0.53481	-0.937051	1.34941
CG1090	1.32275	0.22531	-0.748492	-0.799572
CG10903	-0.72865	-0.924657	1.17834	0.474966
CG10904	-1.27633	0.175822	-0.0557548	1.15627
CG10907	-0.832092	-0.897177	0.925921	0.803348
CG10914	0.454282	-0.0761277	-1.35448	0.976327
CG10916	-0.134835	0.542714	-1.34501	0.937134
CG1092	0.980986	0.579319	-1.27248	-0.28782
CG10927	-0.551189	-0.84129	-0.0175264	1.41001
CG10932	0.722696	0.93004	-0.474966	-1.17777
CG10947	-0.772677	-0.689023	0.0751309	1.38657
CG10948	-0.654708	-0.360317	1.48894	-0.473913
CG10949	0.811853	-0.447407	-1.20063	0.836185
CG10958	-0.948529	1.40756	-0.312319	-0.146712
CG10959	1.31087	0.202774	-0.974716	-0.538925
CG10960	-1.00186	-0.712325	0.956208	0.757978
CG10962	0.0433256	1.39898	-0.700539	-0.741768
CG10970	-0.0860985	1.44053	-0.687198	-0.667238
CG10973	-0.930026	-0.703132	1.2084	0.424756
CG10979	1.11421	0.552992	-1.011	-0.656207
CG10984	1.18013	-0.666502	-0.974853	0.461225
CG11000	-1.47766	0.256991	0.558023	0.662643
CG11007	-0.794073	-0.878139	0.519742	1.15247
CG1103	0.481536	1.06932	-1.23482	-0.316035
CG11030	-0.691229	-0.210997	1.46863	-0.566403
CG11034	-0.83793	-0.83793	1.14736	0.528498
CG11035	-0.0223458	1.1499	-1.28542	0.157867
CG1105	-0.886495	-0.153896	-0.387889	1.42828
CG11050	-0.754416	-0.768585	1.34475	0.178247
CG11052	0.000408548	0.961503	0.417063	-1.37897
CG11070	0.460473	1.159	-1.06793	-0.55154
CG11076	-0.861087	-0.713849	1.29182	0.283117
CG11077	0.905346	-0.472732	-1.18153	0.748912
CG11089	-1.2557	0.10141	1.18819	-0.0339031
CG11095	-0.192289	-0.629277	1.46661	-0.645046
CG11103	0.193657	1.08501	-1.33494	0.056274
CG11106	-0.811911	0.385763	-0.811911	1.23806
CG11109	0.164424	-1.40255	0.273134	0.964993
CG11110	-0.695056	-0.998534	1.0538	0.639791
CG11122	1.24359	0.375852	-0.831255	-0.788185
CG11123	0.607317	1.05467	-0.56856	-1.09343
CG11125	-0.421102	1.4448	-0.18685	-0.836848
CG11127	0.537588	1.13091	-0.692678	-0.975823
CG11134	-0.839238	-0.771245	1.2547	0.355778
CG11137	-0.796389	-0.931333	0.918044	0.809678
CG11141	0.955488	-0.294264	0.613274	-1.2745
CG11151	-0.919886	1.36416	-0.533726	0.0894477
CG11155	-0.898105	1.13647	-0.780029	0.541664
CG11158	-0.590486	1.31411	0.213784	-0.937409
CG1116	-0.906626	-0.454886	-0.0418266	1.40334
CG11164	0.0216716	-1.41083	0.843258	0.5459
CG11168	0.190347	1.20941	-1.21049	-0.189267
CG11170	1.14095	0.172487	-0.0219165	-1.29152
CG11178	-1.0578	-0.453268	0.238845	1.27222
CG11180	-1.03777	-0.580577	1.18095	0.437397
CG11200	0.433767	1.19757	-0.969045	-0.66229
CG11236	-0.569565	-0.569565	1.49217	-0.353036
CG11241	0.637672	1.04684	-1.04062	-0.643891
CG11247	-1.22487	-0.387258	0.647538	0.964587
CG11248	-0.863877	0.5467	-0.817253	1.13443
CG11249	1.30187	0.268509	-0.785188	-0.785188
CG11257	-0.598751	0.931958	-1.09327	0.760067
CG11267	-0.557329	-0.640359	1.48261	-0.284926
CG11279	-1.40818	-0.0144275	0.760887	0.66172
CG1129	-0.810047	-0.838706	0.449407	1.19935
CG11307	-0.0918413	-1.37297	0.862159	0.602655
CG11309	0.51705	1.10264	-1.13013	-0.489557
CG11313	-0.788442	1.29512	-0.788442	0.281769
CG11318	0.422425	-0.943723	1.20803	-0.686733
CG11334	0.913537	0.816961	-0.884121	-0.846378
CG11342	-1.15025	-0.518755	0.921183	0.747822
CG11350	0.92253	-0.865072	-0.865072	0.807614
CG11353	-0.752971	-0.698356	1.39356	0.0577723
CG11357	-1.25431	-0.230141	0.373496	1.11096
CG1136	0	0	0	0
CG11360	1.48868	-0.328023	-0.543835	-0.616824
CG11362	-0.919304	0.406142	-0.707333	1.2205
CG11367	-0.622559	1.22333	-0.98428	0.38351
CG11374	0.100537	1.3726	-0.838526	-0.634612
CG11377	-0.054143	-1.23176	1.21438	0.0715224
CG11378	-0.736182	1.47476	-0.29729	-0.441289
CG11396	-0.614609	-0.663309	-0.187399	1.46532
CG11398	-1.12896	-0.204269	0.0361521	1.29708
CG11399	0.914144	0.43188	-1.40511	0.0590841
CG11400	-0.641014	0.497456	-1.00788	1.15144
CG11403	1.11891	0.564073	-0.758874	-0.924107
CG11406	0.792229	0.936445	-0.839002	-0.889673
CG11413	1.40316	-0.85082	-0.554306	0.00196983
CG11414	0.598813	1.06689	-1.07357	-0.592136
CG11417	-0.48538	-0.882829	1.40834	-0.0401271
CG1142	-0.933239	-0.743193	1.13106	0.545371
CG11426	-0.725829	-0.725829	0.0577374	1.39392
CG1143	-0.194789	-0.883531	1.4336	-0.355279
CG11436	0.58849	1.09246	-0.99443	-0.686523
CG11444	-1.02922	-0.678851	0.956752	0.751323
CG11447	-1.04508	-0.503891	0.297904	1.25106
CG11454	-0.633321	-1.06786	0.774485	0.926692
CG11456	-0.259494	-1.07143	-0.00499389	1.33592
CG1146	-0.0713316	1.14858	0.201453	-1.2787
CG11474	-0.0345371	0.218544	-1.30323	1.11922
CG11475	-0.943039	1.3821	-0.447671	0.00861336
CG11486	0.474676	-1.42496	0.857676	0.0926045
CG11504	1.02129	-0.0563342	-1.3451	0.380145
CG11523	0.588265	0.976521	-1.27028	-0.294503
CG11537	-0.959115	-0.764827	0.929616	0.794326
CG11539	-1.41939	0.591209	0.0314279	0.796754
CG11555	-0.943988	-0.783668	0.898124	0.829533
CG11560	-0.977116	-0.351306	-0.0567169	1.38514
CG11562	1.11805	0.430617	-0.346936	-1.20173
CG11563	-0.686375	-0.790216	1.37637	0.100217
CG11583	-0.975987	-0.534039	1.31276	0.197266
CG11586	1.3028	0.170587	-0.42996	-1.04343
CG11590	0.988887	0.732747	-0.820984	-0.900649
CG11593	-0.548811	-0.948837	1.33065	0.166999
CG11594	-0.279953	1.47463	-0.468008	-0.726672
CG11596	-0.858558	-0.80741	0.498888	1.16708
CG11597	-0.871519	1.35231	-0.625195	0.144407
CG11601	-0.341672	-0.884476	1.43443	-0.208279
CG1161	1.3583	-0.47867	-0.958957	0.079325
CG11619	-1.29418	0.990112	-0.234317	0.538389
CG11638	-1.21883	-0.297771	1.12961	0.386993
CG11655	0.81682	0.913336	-0.895921	-0.834235
CG11658	0.752527	0.972516	-0.866344	-0.858699
CG11679	0.0323194	-0.60009	1.39691	-0.829143
CG11686	-0.972659	-0.366029	-0.0461686	1.38486
CG11695	-1.3425	0.267491	0.0139117	1.0611
CG11696	1.2042	-0.218496	-1.20571	0.220007
CG11699	1.06354	0.639279	-0.923587	-0.779229
CG11700	0.392685	-0.692028	1.22719	-0.927847
CG11710	-0.602027	-1.05728	0.562172	1.09713
CG1172	-0.416734	-0.861026	-0.157559	1.43532
CG11722	-1.27783	-0.254801	0.513572	1.01906
CG11723	0.402618	-0.626215	-0.988374	1.21197
CG11737	0.428023	1.09729	-1.23671	-0.288605
CG11752	0.0698343	0.276932	1.02209	-1.36886
CG11753	0.98899	-1.17531	-0.465052	0.651368
CG11755	0.205944	1.23686	-1.16124	-0.28157
CG11771	1.23455	0.384685	-0.717527	-0.901704
CG11777	-1.31505	0.24101	-0.0267863	1.10083
CG11779	-1.08679	-0.0730625	-0.175359	1.33521
CG11781	-0.751119	-0.542035	-0.161475	1.45463
CG11786	-0.765401	-0.765401	1.3384	0.192405
CG11788	-1.04756	0.115676	1.31889	-0.38701
CG11790	0.341351	-0.015322	1.02654	-1.35257
CG11791	-1.00705	-0.650333	1.13648	0.520897
CG11807	-0.597527	0.943524	-1.09302	0.74702
CG11808	-0.30668	-0.858357	-0.280765	1.4458
CG11811	-1.33402	-0.198103	0.704965	0.827154
CG11825	1.11562	0.541189	-0.616265	-1.04054
CG11836	-0.932148	1.31607	-0.595296	0.211373
CG11837	-0.773963	-0.225275	1.46165	-0.462409
CG11839	-0.895554	-0.805248	0.623251	1.07755
CG11857	-0.934845	-0.70812	0.450696	1.19227
CG11858	0.446154	-1.05937	1.16994	-0.556723
CG11873	-0.763953	-0.518115	1.45531	-0.173239
CG11882	-0.344156	1.38245	-0.983563	-0.0547299
CG11883	-0.641711	-0.641711	1.46416	-0.180733
CG11885	0.187847	1.21882	-0.208446	-1.19822
CG11893	0.538453	-0.318147	-1.24694	1.02664
CG11899	1.27307	0.305592	-0.93044	-0.648221
CG11902	1.1864	0.466357	-0.894005	-0.758757
CG11906	0.0423143	1.29252	-1.13471	-0.20012
CG11911	-0.773488	1.32433	-0.773488	0.222643
CG11920	-0.914939	-0.742169	1.17429	0.482817
CG11927	1.10583	-1.04881	-0.609678	0.552659
CG11961	0.965345	0.741104	-1.03055	-0.675896
CG11964	-1.31321	-0.0822344	0.313606	1.08184
CG11970	0.924867	0.804739	-0.889785	-0.839821
CG11975	-0.335433	-0.692164	-0.455844	1.48344
CG11980	-0.775627	-0.924005	1.07369	0.62594
CG11983	-0.530141	1.49859	-0.530141	-0.438313
CG11986	1.03282	0.67159	-0.974116	-0.7303
CG11999	-1.02269	-0.691465	0.91542	0.798738
CG12004	-1.36049	0.20245	1.04676	0.111282
CG12007	-0.112501	-1.2969	1.09978	0.309626
CG12010	0.94182	0.355611	-1.4053	0.107874
CG12012	-0.57705	-0.205874	-0.68514	1.46806
CG12024	0.168242	-0.549464	-0.948933	1.33015
CG12025	-0.608462	-0.505035	-0.379942	1.49344
CG12054	0.0426845	1.3987	-0.681837	-0.759548
CG12056	1.34022	0.16193	-0.593951	-0.908196
CG12065	0.940388	0.760095	-1.06484	-0.635643
CG12071	-0.875525	0.913189	0.817479	-0.855143
CG12075	-0.410296	1.49704	-0.540982	-0.545764
CG1208	-0.632376	-0.59168	-0.254246	1.4783
CG12081	0.988917	0.733554	-0.876821	-0.845651
CG12084	-1.02073	1.22512	-0.569256	0.364869
CG12091	-0.123345	0.301622	-1.28871	1.11043
CG12093	0.766054	0.930025	-1.08242	-0.613658
CG12096	-1.01574	-0.688565	0.996769	0.707535
CG12099	1.07565	0.55568	-1.13471	-0.496618
CG12104	-0.122842	0.396578	-1.31801	1.04427
CG12105	-1.07413	1.28174	-0.405336	0.197721
CG12106	0.975186	-1.0791	0.714964	-0.611051
CG12107	0.102605	-1.43991	0.773402	0.563902
CG12112	-0.932698	-0.792761	0.782099	0.94336
CG12116	1.45681	-0.777312	-0.48576	-0.193736
CG12118	0.225091	-1.11041	-0.37111	1.25643
CG12121	0.662489	0.34729	-1.4874	0.477625
CG12123	-1.00646	1.38123	-0.254477	-0.120297
CG12128	-0.0779346	1.25647	0.0110411	-1.18958
CG12129	-0.922853	-0.80444	0.79492	0.932373
CG1213	-0.0491459	-0.952375	-0.390599	1.39212
CG12133	-0.87012	-0.849191	1.00756	0.711754
CG12134	0.362934	-0.99664	1.23178	-0.598077
CG12155	0.797269	-0.0189385	-1.40433	0.625996
CG12159	0.789699	0.939125	-0.86288	-0.865944
CG12163	0.113871	0.110748	-1.32671	1.10209
CG12170	-0.283551	0.287996	-1.19316	1.18871
CG12171	0.841919	0.888456	-0.816613	-0.913762
CG12173	-1.01854	-0.591842	1.20246	0.407925
CG12177	0.475916	1.10176	-1.18577	-0.391902
CG12179	0.675459	0.999501	-0.571013	-1.10395
CG1218	0.977152	0.258724	-1.39721	0.161339
CG12182	0.0366286	-1.42287	0.774535	0.611709
CG12184	0.749835	0.958273	-0.679924	-1.02818
CG12204	1.16061	0.499879	-0.940883	-0.719609
CG12209	-0.89171	-0.294981	1.4341	-0.247404
CG12213	0.338792	0.907528	-1.42471	0.178388
CG12219	0.958665	-0.428378	-1.20239	0.672101
CG12224	-0.861409	-0.819384	0.545393	1.1354
CG12236	1.43021	-0.133934	-0.867684	-0.42859
CG12237	1.17746	0.473187	-0.94231	-0.708335
CG12241	0.986605	0.716936	-1.02725	-0.67629
CG12253	-0.0335711	-0.241625	-1.06711	1.3423
CG12259	-0.766197	-0.959462	0.821444	0.904215
CG12267	-1.03369	-0.582802	1.18593	0.430565
CG1227	-0.443918	-1.1696	0.548655	1.06487
CG12279	-0.728157	-0.207754	1.46512	-0.529205
CG12288	-0.719212	-0.482993	1.47483	-0.272627
CG12290	0.0981037	1.26012	-0.189159	-1.16906
CG12299	1.28863	0.282493	-0.898296	-0.672826
CG12301	-0.615466	-0.887675	1.34466	0.158478
CG12316	1.16423	0.487339	-0.67874	-0.972826
CG12320	0.338456	-1.12711	-0.413162	1.20182
CG12321	-1.01276	1.35043	-0.38523	0.0475637
CG12325	-0.471566	-0.759436	1.46497	-0.23397
CG1233	0.419379	1.21802	-0.816015	-0.821384
CG12333	0.324717	1.23807	-1.04653	-0.516258
CG12338	-0.53343	-1.03248	0.322856	1.24306
CG1234	-0.748498	-0.579786	1.44562	-0.11734
CG12341	-0.984041	-0.152384	-0.25723	1.39366
CG12343	-0.759938	-0.85286	0.362233	1.25056
CG12344	1.23048	0.371607	-0.621496	-0.980593
CG1236	1.06311	-0.832594	0.643039	-0.873552
CG12375	0.393505	-0.313764	-1.21109	1.13135
CG12379	-0.970126	-0.701083	1.1279	0.54331
CG12384	-0.190771	-0.276884	-0.944644	1.4123
CG1239	0.227386	-1.25722	-0.132158	1.16199
CG12391	-0.707227	-1.01138	0.851588	0.867023
CG12446	-0.959567	1.3639	-0.464143	0.0598093
CG1246	-0.866021	-0.866021	0.861935	0.870107
CG12470	-0.732306	0.460444	-0.916391	1.18825
CG12493	1.35705	0.140326	-0.842622	-0.654757
CG12499	-0.260648	1.25715	0.155632	-1.15213
CG12512	1.03087	0.663121	-0.669841	-1.02415
CG12519	1.43206	-0.0933462	-0.818368	-0.520347
CG12535	0.935129	0.787955	-0.761169	-0.961915
CG12541	-0.773488	-0.773488	0.222641	1.32434
CG12547	-0.84977	-0.746751	0.326129	1.27039
CG12560	-0.717552	-0.348641	1.48051	-0.414318
CG12567	-0.812246	1.10498	-0.879997	0.587259
CG12576	0.605327	1.0592	-1.08361	-0.580916
CG12592	0.507074	1.15438	-0.708156	-0.953303
CG12605	-0.915505	1.20846	0.427354	-0.720308
CG12608	-0.394745	-1.16329	1.1513	0.406743
CG12643	0.941924	0.785152	-0.91314	-0.813936
CG1265	0.233727	1.19173	-1.21731	-0.208146
CG12655	-0.630403	-0.630403	-0.209349	1.47016
CG12659	-0.499684	1.09473	0.531592	-1.12663
CG12674	-0.712596	1.40859	-0.712596	0.0165981
CG12699	-0.705023	0.969252	-1.00635	0.742123
CG12702	1.0278	0.687365	-0.846597	-0.868574
CG1271	0.849111	0.875204	-0.747273	-0.977042
CG12713	1.03464	0.675336	-0.93054	-0.779441
CG12717	-0.463658	-1.17234	0.62773	1.00827
CG12725	-0.696081	-0.696081	1.42474	-0.0325758
CG12728	0.811546	0.63939	-1.38878	-0.0621559
CG12730	0.563977	1.00624	-1.25234	-0.317878
CG12744	1.18535	0.458608	-0.951073	-0.692883
CG12746	-1.22106	1.04453	0.536805	-0.360273
CG1275	0.934308	0.769021	-1.05783	-0.645495
CG12766	0.331081	-0.89983	-0.695155	1.2639
CG12768	1.01173	0.696842	-0.979219	-0.729349
CG12773	-0.112356	-0.557255	-0.772591	1.4422
CG12795	-0.650376	-0.919828	1.28418	0.286026
CG12811	0.984935	0.721221	-0.688366	-1.01779
CG12818	-0.253035	-0.898615	-0.280128	1.43178
CG12822	-0.587105	-1.04339	0.470742	1.15976
CG12824	1.46912	-0.208531	-0.672972	-0.587621
CG12825	1.43006	-0.648006	-0.729553	-0.0525056
CG12836	1.3851	0.0805094	-0.755503	-0.710102
CG12848	-0.287889	-1.26371	1.01707	0.534528
CG12853	1.47734	-0.281027	-0.705188	-0.491124
CG12860	1.35104	-0.364581	-1.02012	0.0336638
CG12861	1.37249	0.0340381	-0.954198	-0.452334
CG12863	-0.376119	1.36094	-1.00302	0.0181935
CG12868	-0.477164	0.353886	-1.08716	1.21044
CG12869	0.926506	0.793851	-0.985823	-0.734534
CG12877	-1.06217	-0.62692	1.00619	0.682899
CG12880	-0.642819	-0.642819	-0.177894	1.46353
CG12883	0.855181	-1.12893	0.828509	-0.554762
CG12895	-0.627909	-1.06957	0.951248	0.746235
CG12896	1.23409	0.283619	-0.408936	-1.10877
CG12909	-0.712124	-0.593857	1.45531	-0.149325
CG12910	-0.70609	-0.70609	-0.00304537	1.41523
CG12913	1.09612	0.599125	-0.884019	-0.811224
CG12920	-0.123012	1.44984	-0.627395	-0.699433
CG12926	0.59528	1.09959	-0.858221	-0.836654
CG12929	1.19788	0.437416	-0.682247	-0.953046
CG12934	1.0852	0.614494	-0.838308	-0.861384
CG12935	-0.934652	1.16213	-0.726115	0.498638
CG12942	-0.237273	1.0237	-1.28386	0.497436
CG12945	-0.932149	-0.652605	0.318308	1.26645
CG12947	-0.833301	-0.555587	-0.024037	1.41292
CG12948	0.830878	0.883103	-1.0315	-0.682482
CG12963	-0.387255	-0.701302	1.48389	-0.395331
CG12971	-1.04614	-0.371579	1.32633	0.0913859
CG12974	-0.818178	-0.482682	1.44147	-0.140608
CG12975	-1.11241	-0.478691	1.16133	0.429771
CG12990	-1.09267	-0.0275702	1.32753	-0.207285
CG12991	-0.916671	-0.286292	-0.221377	1.42434
CG12992	-0.5	-0.5	-0.5	1.5
CG13001	-0.731197	-0.987245	0.943408	0.775034
CG13004	-1.41611	0.666271	0.00776665	0.742068
CG13005	0.825248	-1.30465	-0.261261	0.740667
CG13010	-0.0617145	1.42601	-0.555599	-0.808698
CG13012	-0.273859	1.4645	-0.406343	-0.784299
CG13014	0.0651848	-0.9366	1.36814	-0.496722
CG13016	-0.82765	1.31216	-0.730038	0.245533
CG13018	0.803099	0.925588	-0.818838	-0.909849
CG13025	0.207436	1.33131	-0.788441	-0.750302
CG1307	-0.296505	-0.144015	1.40227	-0.961754
CG13074	0.640119	1.06536	-0.874348	-0.831129
CG13077	0.759181	0.165167	0.530084	-1.45443
CG13085	1.10946	0.57597	-0.934925	-0.750509
CG13086	0.254109	1.18838	-1.21257	-0.229913
CG13088	-0.69833	-0.249352	-0.526436	1.47412
CG1309	-1.12841	-0.210059	0.0420113	1.29646
CG13096	-0.642229	-0.630414	1.46708	-0.194434
CG13097	-0.640117	-0.623416	1.46943	-0.205892
CG13102	-0.698307	-0.698307	1.42269	-0.0260778
CG13116	-0.741961	-0.593117	1.44423	-0.10915
CG13117	-0.892069	-0.693831	0.310625	1.27527
CG13123	0.75241	-0.270229	-1.30048	0.818298
CG13124	-0.606008	-1.07259	0.647641	1.03096
CG13126	0.675467	1.03149	-0.746431	-0.960527
CG13127	-0.865844	-0.865844	0.890884	0.840805
CG13144	0.078589	1.37262	-0.894015	-0.557197
CG13151	0.844457	0.855374	-1.08499	-0.614845
CG13155	-0.404575	1.18217	-1.14261	0.365013
CG13159	-0.611308	-0.375245	1.49299	-0.506436
CG1316	1.31788	-0.581131	-0.940247	0.203496
CG13160	-0.643144	-0.538695	1.48473	-0.302893
CG13168	1.15637	-0.196792	-1.24258	0.282999
CG1317	1.23788	0.36611	-0.955684	-0.648302
CG13185	-0.276014	0.589818	0.967085	-1.28089
CG13192	-0.908552	-0.81651	0.762721	0.962341
CG13197	-0.949373	-0.742355	0.604381	1.08735
CG13204	1.42045	-0.0222219	-0.745626	-0.652597
CG13220	-0.956264	-0.72849	1.10282	0.581929
CG13229	-0.5	-0.5	-0.5	1.5
CG1324	1.01504	-0.858965	-0.858965	0.702893
CG13244	-1.18673	0.781413	0.873079	-0.467764
CG13248	-0.695865	1.47994	-0.296749	-0.487326
CG13252	-0.863081	-0.863081	0.762166	0.963995
CG13255	1.47636	-0.739846	-0.338416	-0.398093
CG13295	-0.718248	-0.842056	0.252049	1.30826
CG13314	-1.07955	-0.17387	-0.0870238	1.34044
CG13315	-0.929337	-0.359207	-0.122908	1.41145
CG13319	-0.337341	0.0954785	1.31421	-1.07235
CG13321	-0.819587	-0.440309	1.44871	-0.188812
CG13339	0.023356	-0.88171	-0.533542	1.3919
CG13344	-1.16583	0.673539	-0.483924	0.976216
CG13358	0.268577	1.30151	-0.81111	-0.758975
CG13360	1.4009	0.0377034	-0.744494	-0.694108
CG13364	-0.837947	-0.867254	1.06691	0.638289
CG13365	-1.0885	-0.514602	1.16582	0.437275
CG13366	1.0379	0.255187	0.0681671	-1.36125
CG13367	0.0959773	-1.43847	0.570099	0.772391
CG13369	0.650405	0.9448	-1.25147	-0.343738
CG13373	-1.19877	-0.0797654	0.0312854	1.24725
CG13375	-0.903114	0.196794	1.32687	-0.620548
CG13377	0.484823	1.17605	-0.794283	-0.866587
CG13384	-0.750158	0.356162	-0.8596	1.2536
CG13390	1.05504	-1.33299	-0.049974	0.327926
CG13392	-0.802666	-0.435508	-0.21743	1.4556
CG13397	-0.650326	1.46766	-0.19766	-0.619671
CG13398	-0.780028	-0.771692	0.231743	1.31998
CG13405	1.47766	-0.26692	-0.526913	-0.683831
CG13409	1.21675	0.374208	-0.556816	-1.03414
CG13436	-0.926568	0.73573	0.984791	-0.793952
CG1344	0.424209	1.14114	-1.16523	-0.400121
CG13482	-0.834325	-0.799987	1.22239	0.411917
CG13484	1.01201	-0.427763	-1.19273	0.608486
CG13488	1.26382	0.33413	-0.714127	-0.883822
CG13506	-0.811683	-0.811683	1.2387	0.38467
CG13516	0.593516	0.264994	0.621696	-1.48021
CG13531	0.93952	0.772697	-1.02103	-0.691189
CG1354	-0.67432	0.960492	0.74624	-1.03241
CG13551	-0.765343	-0.948327	1.00947	0.704201
CG13559	-0.866006	-0.809105	0.527408	1.1477
CG13562	1.35772	0.148483	-0.742692	-0.763513
CG13563	1.12125	0.541156	-0.646585	-1.01582
CG1358	0.340032	1.26306	-0.846913	-0.756176
CG13585	0.0186019	-0.183204	-1.13272	1.29732
CG13599	-0.162603	1.09725	0.349017	-1.28366
CG1360	-0.0204196	-0.566245	-0.826235	1.4129
CG13601	0.230685	1.31916	-0.827747	-0.722101
CG13603	0.287553	1.14826	-1.25083	-0.184982
CG13604	-1.35651	-0.00417716	1.0225	0.33819
CG13605	0.896632	-0.00775591	-1.39337	0.504493
CG13609	-0.858668	-0.81421	0.519824	1.15305
CG13623	-0.609869	-0.874321	0.124758	1.35943
CG13625	-0.642869	-1.04173	1.04552	0.639075
CG13630	-1.00944	-0.624062	1.17551	0.457986
CG13631	-0.261815	1.16768	0.307887	-1.21375
CG13654	-1.00738	0.250692	-0.526108	1.28279
CG13663	-1.16679	-0.360581	0.350076	1.1773
CG13667	-0.783112	1.38221	-0.684757	0.0856585
CG13671	1.0432	0.657449	-0.979506	-0.721147
CG13676	1.01754	0.698636	-0.90219	-0.813986
CG13689	-1.0719	0.277937	-0.457003	1.25097
CG13690	-0.903003	-0.585121	1.35026	0.13786
CG13692	-0.597907	-0.597907	1.48392	-0.288103
CG13707	-0.829003	-0.829003	1.18327	0.474732
CG1371	0.867537	0.789468	-0.474039	-1.18297
CG13739	-0.861906	-0.861906	0.981218	0.742595
CG13741	-1.08702	0.924299	0.77086	-0.608139
CG13742	0.513431	0.709865	0.249819	-1.47312
CG13743	0.833669	0.873776	-1.05845	-0.648997
CG13751	0.745896	0.727559	-1.38045	-0.0930035
CG13760	1.2077	0.409007	-0.991813	-0.624891
CG13766	-0.10395	1.44242	-0.749408	-0.589065
CG13773	-0.74374	-0.911669	1.17808	0.477332
CG13775	1.2684	0.328245	-0.732097	-0.86455
CG13784	-0.598674	1.11678	-1.05283	0.534721
CG13807	-0.787324	-0.0695973	-0.573568	1.43049
CG13813	0.365665	0.973224	0.0456825	-1.38457
CG13827	-0.651677	0.0154221	-0.771063	1.40732
CG13850	-0.896313	-0.729352	1.22712	0.398541
CG13868	-0.821255	-0.847932	1.16129	0.5079
CG13876	-0.862024	0.0809719	-0.595713	1.37677
CG13877	0.452101	1.17292	-1.03556	-0.589464
CG13887	-0.982348	-0.669604	0.492697	1.15926
CG13893	-0.668674	-0.25451	-0.553781	1.47697
CG13895	0.862114	0.618828	-1.36386	-0.117086
CG13896	-0.636938	-0.83434	1.37433	0.0969467
CG13898	-0.676329	1.44129	-0.676329	-0.0886286
CG13901	-0.77254	-0.915214	1.10969	0.578066
CG13907	0.827708	0.783349	-1.2547	-0.356357
CG13917	0.379563	1.241	-0.847421	-0.773136
CG13919	-0.810035	-0.715568	0.184842	1.34076
CG13920	-0.469765	1.49777	-0.575622	-0.452387
CG13921	1.4969	-0.484396	-0.583988	-0.428511
CG13926	-0.606018	-1.08985	0.788822	0.907045
CG13928	-0.756744	-0.756744	1.35229	0.161197
CG13933	0.736236	0.981991	-0.952648	-0.765579
CG13937	-0.330814	-1.16336	0.288343	1.20583
CG1394	-0.5	-0.5	-0.5	1.5
CG13982	1.05089	0.658817	-0.849423	-0.86028
CG13992	-1.14102	-0.0510674	1.2978	-0.105708
CG13994	0.0175694	0.295015	-1.35291	1.04033
CG14005	1.4372	-0.220001	-0.878123	-0.339072
CG14024	-0.862614	-0.862614	0.971209	0.754019
CG14036	0.0414335	1.36769	-0.444852	-0.964271
CG14043	1.20544	-0.91252	-0.72582	0.432897
CG14050	-0.885048	0.449444	1.19755	-0.761947
CG14057	-0.346799	-1.24029	0.996024	0.591062
CG1407	-1.11474	-0.505133	0.501553	1.11832
CG14072	-0.560949	-0.431178	-0.505751	1.49788
CG14073	-0.516787	-1.10617	0.50136	1.12159
CG14074	-0.454434	-0.464281	-0.578889	1.4976
CG14077	-0.86601	0.858594	-0.86601	0.873426
CG14079	0.660733	1.0491	-0.877977	-0.831854
CG14100	-0.667973	-0.699207	1.43536	-0.0681848
CG14102	0.220886	-0.809932	-0.735461	1.32451
CG14104	1.08104	0.615891	-0.926758	-0.770169
CG14105	-0.766785	-0.639462	-0.00904347	1.41529
CG14109	-0.701045	-0.701045	-0.0180334	1.42012
CG14113	-0.701111	1.42006	-0.701111	-0.0178375
CG14117	0.795557	0.818284	-1.25148	-0.362365
CG14130	-0.987779	-0.730499	0.944066	0.774211
CG14135	-0.249324	-1.15756	1.25491	0.151977
CG14142	0.943075	0.785343	-0.872349	-0.856069
CG14154	-0.601887	-0.601887	-0.278717	1.48249
CG1416	-0.999012	-0.287099	1.38215	-0.0960339
CG14174	-0.937256	-0.776489	0.69851	1.01523
CG1418	-0.361136	-1.25032	0.742925	0.86853
CG14182	-0.756237	-0.684547	0.0415805	1.3992
CG14183	0.74655	-0.390321	0.877078	-1.23331
CG14184	-0.668023	-0.826947	0.134118	1.36085
CG14194	1.1193	0.179444	-1.30953	0.0107884
CG14200	1.01868	0.698285	-0.839787	-0.877179
CG14207	1.24735	0.359078	-0.691648	-0.914776
CG14210	-0.519015	-0.897509	1.38717	0.029355
CG14220	0.63308	-1.25021	-0.341732	0.958859
CG14221	-0.755822	1.46204	-0.208569	-0.497653
CG14223	0.601131	1.09485	-0.818395	-0.87759
CG14229	0.524729	-0.141869	-1.33844	0.955575
CG14230	-0.845493	-0.882069	0.949983	0.777579
CG14231	-0.734906	1.47731	-0.3404	-0.402001
CG14232	-0.351014	-1.13955	0.261891	1.22867
CG14252	-1.14923	-0.271095	0.163764	1.25656
CG14253	-0.857576	-0.856085	0.678836	1.03482
CG14257	1.32666	0.216002	-0.730113	-0.812553
CG14260	0.350793	1.23017	-0.55185	-1.02912
CG14270	-0.849797	-0.88075	0.913903	0.816644
CG14273	-0.86523	-0.830146	1.09778	0.5976
CG14285	1.26041	0.0526843	-0.133819	-1.17927
CG14286	-0.64408	-1.04091	1.04508	0.639905
CG14292	-1.02706	-0.641027	1.10142	0.566659
CG14297	1.47968	-0.609233	-0.609233	-0.26121
CG14302	-0.366452	-0.759991	-0.346088	1.47253
CG14312	0.608074	-0.177492	0.904094	-1.33468
CG14322	0.564428	0.94678	-0.188525	-1.32268
CG14325	-0.528503	1.49874	-0.528503	-0.441738
CG1434	0.105347	1.1822	-0.026351	-1.26119
CG14341	-0.320398	-1.0652	0.0592499	1.32634
CG14352	-1.06581	-0.627355	0.982698	0.710471
CG14367	1.23904	0.384044	-0.804149	-0.81893
CG1440	0.42453	1.20412	-0.962018	-0.66663
CG14401	0.659599	1.02863	-1.04635	-0.641882
CG14407	-1.02263	-0.626572	1.14218	0.507014
CG14408	1.01827	-1.26344	-0.287781	0.532942
CG14411	0.705369	0.780357	-1.37128	-0.114449
CG14414	-1.29927	-0.228526	0.979045	0.548755
CG14431	-0.859499	-0.293591	1.44553	-0.292436
CG14434	-0.683393	-0.708617	1.4247	-0.0326888
CG14435	0.909252	0.655575	-1.29189	-0.272933
CG14440	0.295192	1.22906	-1.10897	-0.41528
CG14441	1.21641	0.419879	-0.766509	-0.869779
CG14442	-0.934526	1.13482	-0.739986	0.539696
CG14450	-0.744765	-0.929323	0.536712	1.13738
CG14459	-0.59201	-0.59201	1.48591	-0.301885
CG14464	-0.876714	-0.854325	0.905861	0.825177
CG14478	0.860648	-1.04524	-0.665898	0.850492
CG14480	-0.961639	-0.759678	0.951963	0.769354
CG14483	0.979026	-1.39778	0.21422	0.204533
CG14490	1.0982	-1.28147	0.351454	-0.168181
CG14502	-0.0905449	-0.86421	-0.468446	1.4232
CG14511	-0.701278	0.768473	-1.01222	0.945024
CG14512	-1.19657	-0.452391	0.779669	0.869294
CG14516	-0.513925	1.4997	-0.513925	-0.471854
CG14535	1.28893	0.291726	-0.836718	-0.743941
CG14543	-0.57152	-0.980077	1.28032	0.271276
CG14544	-0.901894	-0.316705	1.42899	-0.210393
CG14556	1.27224	-0.617447	0.299419	-0.95421
CG14561	1.16402	0.461121	-0.576032	-1.04911
CG14562	0.556659	1.12228	-0.942451	-0.736485
CG14567	-0.736989	1.40357	0.0304961	-0.697075
CG14589	-0.619493	-0.619493	-0.236343	1.47533
CG14609	-0.0987334	1.44406	-0.673395	-0.671929
CG14610	-0.860992	-0.771761	0.410089	1.22266
CG14613	0.492376	0.917289	-1.38401	-0.0256533
CG14615	1.06187	0.633102	-0.980034	-0.714942
CG14618	0.761071	0.00648438	0.647279	-1.41483
CG14621	1.09836	0.596961	-0.838317	-0.857006
CG14629	-1.35058	0.780021	-0.164566	0.735127
CG1463	0.750794	0.801706	-0.233826	-1.31867
CG14641	-0.0338929	-0.729541	-0.661165	1.4246
CG14642	0.866802	0.776012	-1.20679	-0.436024
CG14645	1.30208	0.0925864	-1.0995	-0.295166
CG14646	0.907704	-1.02357	-0.690956	0.806821
CG14647	-0.353012	0.801095	-1.25681	0.808731
CG14650	0.0127346	1.40867	-0.762208	-0.659193
CG14655	0.732475	0.989979	-0.861227	-0.861227
CG14657	0.105489	1.20757	-1.23471	-0.0783411
CG14667	-1.2857	-0.287751	0.672034	0.901415
CG14671	-0.514464	-1.1561	0.876399	0.794161
CG14683	0.553606	-1.21911	1.03484	-0.369338
CG14688	1.24251	0.226883	-0.331504	-1.13789
CG14692	1.13574	-0.974911	-0.691444	0.530618
CG14695	0.972507	0.74994	-0.926064	-0.796383
CG14696	0.797056	0.886245	-0.556591	-1.12671
CG14701	-0.817267	-0.315412	1.45828	-0.325598
CG14710	-0.948351	-0.184069	-0.278053	1.41047
CG14711	-1.34493	0.0262109	0.258761	1.05996
CG14712	1.42782	-0.0524587	-0.767521	-0.607845
CG14715	1.24337	0.206801	-0.300951	-1.14922
CG14721	-0.704438	1.29076	0.28382	-0.870143
CG14722	-1.20435	-0.197041	1.21488	0.186507
CG14740	-1.06364	1.23003	0.330234	-0.49663
CG14757	0.502067	1.15832	-0.712369	-0.948022
CG14762	0.527445	0.19815	0.737042	-1.46264
CG14764	1.1586	0.46879	-1.05212	-0.575273
CG14767	0.916552	0.813135	-0.827182	-0.902505
CG14777	-0.976192	0.190734	-0.529821	1.31528
CG14780	-0.704447	1.40459	-0.728075	0.0279294
CG14785	1.27143	0.127601	-0.258755	-1.14028
CG14787	-0.418334	1.42572	-0.126252	-0.88113
CG14803	1.03342	0.680173	-0.881277	-0.832319
CG14805	-1.43204	0.481726	0.839604	0.110713
CG14806	0.271276	-1.4316	0.260989	0.899337
CG14812	0.126594	0.0826371	-1.32019	1.11096
CG14814	0.752816	0.971672	-0.895355	-0.829133
CG14817	-1.13128	-0.542783	0.726656	0.947403
CG14818	0.887762	0.226112	-1.43455	0.320672
CG14834	1.46785	-0.258494	-0.450879	-0.758482
CG14855	-0.146155	1.31921	-1.11108	-0.0619765
CG1486	0.111642	-0.928366	-0.538251	1.35498
CG14860	0.527025	1.12561	-1.03802	-0.614623
CG14879	-0.754585	-0.840445	1.27301	0.322018
CG14881	0.998387	0.686317	-1.08013	-0.60457
CG14882	1.34839	0.102674	-0.482089	-0.96897
CG14883	-0.537247	-0.0247514	-0.848787	1.41079
CG14894	-0.83334	-0.664156	0.139159	1.35834
CG14903	-0.846887	-0.651004	0.141847	1.35604
CG14906	-0.711521	-0.438422	1.4806	-0.330661
CG14907	-1.11293	-0.568468	0.951756	0.729646
CG1492	0.226726	1.2107	-1.1929	-0.244528
CG14937	1.37438	-0.0427946	-0.3321	-0.999482
CG1494	0.142119	1.36046	-0.757195	-0.745386
CG14957	0.786947	0.941644	-0.866101	-0.862491
CG14961	-0.431461	0.411449	1.15986	-1.13985
CG14963	0.628525	1.07455	-0.845157	-0.857914
CG14964	-1.00305	1.34326	-0.426688	0.0864792
CG14965	1.04553	-1.35802	0.0731342	0.239362
CG14966	1.11896	0.528018	-1.06105	-0.585924
CG14969	0.996316	0.626569	-1.19738	-0.425509
CG14971	0.149297	1.32109	-1.01035	-0.460034
CG14977	0.240089	-1.02456	-0.497971	1.28244
CG14984	-0.61666	-0.775265	-0.0285953	1.42052
CG14985	-0.411546	-0.253454	-0.795614	1.46061
CG14990	-0.826994	-0.901703	0.797958	0.93074
CG14995	-0.664803	-0.741999	-0.0100163	1.41682
CG14997	-0.766634	-0.324797	-0.379262	1.47069
CG15011	0.613273	-1.00295	-0.683244	1.07292
CG15012	-0.501119	-1.0423	0.286211	1.25721
CG15014	-0.531537	-0.976905	0.195014	1.31343
CG15019	-0.792867	-0.846402	1.2142	0.425068
CG15027	-0.950028	-0.677618	1.20984	0.417802
CG15034	-0.876601	1.4397	-0.293702	-0.269396
CG15040	-1.10482	1.17779	-0.477803	0.404838
CG15043	1.45589	-0.170168	-0.531299	-0.754421
CG15073	1.20876	0.14337	-1.22571	-0.126418
CG15083	0.321037	1.11764	-1.27293	-0.165746
CG15084	-0.422979	-1.13465	1.17916	0.378475
CG15093	1.07453	0.413422	-0.211304	-1.27665
CG15097	-0.82043	-0.892827	1.03288	0.680378
CG15098	1.01395	0.701187	-0.926123	-0.789013
CG15099	0.63408	1.06201	-0.722148	-0.973946
CG15107	0.903993	0.81058	-0.690142	-1.02443
CG15109	1.10724	0.562511	-1.01314	-0.65661
CG15111	-1.1604	0.781364	-0.5073	0.886335
CG15117	-0.637683	-0.645088	-0.181558	1.46433
CG15118	0.931074	0.116442	-1.41001	0.362498
CG15127	-1.01191	-0.706324	0.83714	0.881098
CG1513	-1.10591	-0.55338	0.612719	1.04657
CG15141	0.163249	0.757558	-1.45426	0.533456
CG15143	-0.779802	-0.779802	1.31255	0.247058
CG15144	-0.5	-0.5	-0.5	1.5
CG15145	-0.813873	-0.813873	0.39528	1.23247
CG15160	1.19511	0.43308	-0.985328	-0.642865
CG15168	1.34657	-1.06117	-0.242508	-0.0428945
CG15170	-0.509749	1.49986	-0.480358	-0.509749
CG15186	-0.5	-0.5	-0.5	1.5
CG15196	-0.638343	1.46601	-0.638343	-0.189325
CG15200	1.46341	-0.643024	-0.643024	-0.177366
CG15201	-0.84568	-0.84568	1.10959	0.581768
CG15202	-1.34395	0.601622	0.898576	-0.15625
CG15209	1.2473	0.366303	-0.870836	-0.742768
CG15210	-0.794508	-0.692321	0.117268	1.36956
CG15211	0.396413	0.985413	-0.0137507	-1.36808
CG15219	0.679109	0.602367	-1.4638	0.182328
CG1523	-0.91675	1.03338	-0.794827	0.678201
CG15237	1.24701	0.117754	-1.18229	-0.18247
CG15247	-1.01932	1.29024	-0.495715	0.224789
CG15278	-0.731034	-0.149655	1.4541	-0.573407
CG1529	0.490506	-0.915129	-0.744713	1.16934
CG15293	-0.691089	-0.0470103	-0.691089	1.42919
CG15309	0.801878	0.852586	-1.1888	-0.465666
CG15312	0.880048	0.850931	-0.82493	-0.906049
CG15317	0.987891	0.60086	-1.24213	-0.346617
CG1532	-0.0758082	-0.186079	-1.07846	1.34035
CG15322	1.20152	0.444065	-0.873664	-0.771923
CG15332	-0.860855	1.43279	-0.431696	-0.140243
CG15333	1.48331	-0.321743	-0.684807	-0.476764
CG15336	0.0285568	-0.495153	-0.916735	1.38333
CG15343	0.23137	1.30554	-0.943083	-0.593827
CG15347	-0.903614	-0.797133	0.624773	1.07597
CG15353	-0.356969	1.43462	-0.880714	-0.196936
CG15356	1.45445	-0.18058	-0.494476	-0.779395
CG15362	-0.785287	-0.843877	0.399788	1.22938
CG15365	-0.00485188	1.39962	-0.512508	-0.882259
CG15375	0.322889	1.27168	-0.73703	-0.857536
CG15382	0.851083	0.88077	-0.854851	-0.877002
CG15385	-0.784152	0.264335	-0.784152	1.30397
CG15387	-0.464784	-0.335333	-0.684246	1.48436
CG15390	-0.907225	-0.791683	1.0808	0.618112
CG15399	0.195029	1.25646	-1.13186	-0.319627
CG15418	0.81682	0.856697	-0.521682	-1.15183
CG1542	0.146266	0.251228	0.992154	-1.38965
CG15422	-0.828627	-0.6255	1.38467	0.06946
CG15423	-0.590495	-0.56586	1.48992	-0.333562
CG15432	0.786132	-1.46086	0.236699	0.438025
CG15435	0.220973	0.239755	-1.41095	0.950219
CG15436	1.41018	-0.948105	-0.284586	-0.177488
CG15439	1.37852	0.0933151	-0.798551	-0.673279
CG1544	0.368885	1.2116	-0.519163	-1.06133
CG15443	-0.312883	-1.27725	0.738176	0.851957
CG15445	-1.42691	0.450901	0.110971	0.865041
CG15449	-0.929723	0.265615	1.2924	-0.628296
CG15456	-1.31021	-0.0928984	0.320535	1.08258
CG15482	-0.0668796	1.43394	-0.633971	-0.73309
CG15484	0.572331	1.07929	-0.557805	-1.09381
CG15514	0.767819	0.629355	-1.41911	0.0219401
CG15525	-0.938987	-0.75505	0.60898	1.08506
CG15530	-0.841754	-0.841754	0.553828	1.12968
CG15531	0.502468	-0.650817	1.14957	-1.00122
CG15535	-1.0129	1.01478	-0.688059	0.686177
CG15536	-1.33475	-0.132139	0.483348	0.983542
CG15543	0.981819	0.704128	-1.08693	-0.599021
CG15547	0.757305	0.967044	-0.814086	-0.910263
CG15561	-0.964894	-0.582507	1.28967	0.257735
CG15579	1.44784	-0.776836	-0.141637	-0.529365
CG15597	-0.080146	0.879814	-1.37445	0.574787
CG15601	-1.43796	0.189584	0.382209	0.866167
CG15602	-1.22209	-0.241619	0.297749	1.16596
CG15611	-0.500154	-0.827644	1.4331	-0.105298
CG15628	0.774919	0.950132	-0.929053	-0.795998
CG15642	1.3232	0.214788	-0.668283	-0.869709
CG15643	0.491228	1.0551	-1.24745	-0.298885
CG15650	-1.39338	0.935769	0.0311451	0.426462
CG15653	-0.793732	-0.914458	1.04749	0.660705
CG15657	-0.895435	1.42901	-0.349773	-0.183802
CG15673	-0.652023	-0.652023	1.45808	-0.154037
CG15674	-0.922921	1.24362	-0.684851	0.364154
CG15695	0.906088	0.824945	-0.854748	-0.876285
CG15696	0.535135	1.13238	-0.977026	-0.690487
CG15701	-0.861689	-0.861689	0.739284	0.984094
CG15706	0.980855	0.66617	-1.16833	-0.478697
CG15715	0.787835	0.323881	0.354213	-1.46593
CG15717	-0.865307	-0.855736	0.722739	0.998303
CG1572	-1.09128	-0.594184	0.709182	0.976279
CG15725	0.599468	1.08873	-0.967197	-0.720998
CG15739	0.2415	1.31032	-0.87754	-0.674282
CG15740	0.562847	1.08093	-1.10807	-0.535705
CG15743	1.07839	0.613339	-0.96818	-0.723547
CG15744	0.88199	0.849885	-0.85912	-0.872755
CG15747	-0.54875	-1.09602	0.553142	1.09163
CG1575	0.312241	1.19162	-1.17131	-0.332555
CG15771	-0.837913	-0.120952	-0.47544	1.4343
CG1578	0.941804	0.78496	-0.808682	-0.918082
CG15784	1.14179	0.33501	-1.2352	-0.241594
CG15814	0.111649	1.29781	-1.09838	-0.31108
CG15818	-0.897314	-0.824031	0.991604	0.729741
CG1582	0.753103	0.949259	-0.647807	-1.05456
CG15820	-0.204388	0.967874	-1.31179	0.548308
CG15822	-1.3575	0.557555	0.912989	-0.113045
CG15861	0.20993	-1.42038	0.926057	0.284389
CG15864	-0.816742	-0.816742	1.22401	0.409477
CG15870	-0.17089	1.46136	-0.609313	-0.681154
CG15877	-1.04909	-0.658772	0.794619	0.913242
CG15879	-0.966215	0.39267	-0.648044	1.22159
CG15891	-0.80389	-0.69207	0.133223	1.36274
CG15892	0.657409	-0.380468	-1.23042	0.953479
CG15908	-0.921976	-0.778683	1.07112	0.629542
CG15909	0.18626	-1.21031	1.21064	-0.186586
CG15912	-1.2958	-0.16941	0.401875	1.06334
CG15914	-0.605081	1.48396	-0.590295	-0.288587
CG15916	-0.570047	0.211912	-0.95363	1.31177
CG15922	1.10553	0.546937	-1.06429	-0.588179
CG15923	0.693034	1.02299	-0.837711	-0.878314
CG1598	0.134447	-1.4166	0.36428	0.917868
CG1602	0.85896	-1.34738	-0.160447	0.648862
CG1603	0.215858	1.32349	-0.677534	-0.861814
CG1607	-0.862865	-0.862865	0.75832	0.967409
CG1620	1.31047	-0.110272	-1.12463	-0.0755651
CG1622	-0.34903	1.16365	0.364798	-1.17942
CG1628	-0.0948637	0.0272681	1.25609	-1.18849
CG1635	0.965713	-0.455012	-1.18539	0.67469
CG1636	0.097307	1.36897	-0.877109	-0.589171
CG1637	0.771585	0.863647	-1.21872	-0.416508
CG1638	0.296951	1.2841	-0.709726	-0.871322
CG1640	0.805832	0.84745	-1.19119	-0.462092
CG1646	1.15968	0.430226	-1.11599	-0.47392
CG1647	0.0522644	1.39056	-0.828074	-0.614747
CG1648	-0.996612	-0.711447	0.709333	0.998726
CG1662	-1.42029	0.103423	0.887561	0.429309
CG1663	-1.26	-0.259163	0.450301	1.06886
CG16700	-0.674789	-0.140794	-0.639169	1.45475
CG1671	-0.166324	1.32656	-0.0607459	-1.09949
CG16710	-0.980213	-0.742109	0.809879	0.912443
CG16711	0.999568	0.554802	-1.26964	-0.284728
CG16713	-0.568823	-0.589682	1.48965	-0.331145
CG16717	-1.07869	0.190944	-0.394557	1.2823
CG16721	-0.0572724	1.35617	-1.04566	-0.253239
CG1673	1.08672	0.485724	-0.3698	-1.20265
CG16734	-1.0067	1.38022	-0.263547	-0.109977
CG1674	0.830272	-0.574712	-1.11462	0.859059
CG16743	0.386114	1.07808	-0.176784	-1.28741
CG16753	-0.846909	-0.865555	1.03967	0.672798
CG16758	-1.23744	0.825375	-0.386681	0.798742
CG1677	1.10877	0.573194	-0.958394	-0.723571
CG16779	-0.806645	-0.806645	1.25234	0.360948
CG16782	-0.635392	0.730568	-1.06199	0.966813
CG16787	-0.67281	-1.03895	0.818076	0.893681
CG16789	1.3705	0.117954	-0.749855	-0.7386
CG16790	-1.11659	-0.565967	0.934601	0.747953
CG16791	1.17178	-0.464347	0.408219	-1.11565
CG16812	0.812756	0.459619	-1.44819	0.175819
CG16824	-1.28486	0.665449	0.9074	-0.287989
CG16863	-1.14426	-0.322709	1.23872	0.228258
CG16865	0.445673	1.19852	-0.903422	-0.740774
CG16868	1.42319	-0.0381862	-0.776055	-0.608946
CG16890	-1.47428	0.600659	0.231749	0.641872
CG16896	0.98916	0.560556	-0.271604	-1.27811
CG16903	0.614248	1.08339	-0.785635	-0.912002
CG16908	1.43694	-0.082878	-0.753103	-0.600963
CG16926	0.505632	-1.24124	1.05085	-0.315249
CG16935	1.01125	-0.00700836	-1.36034	0.356097
CG16952	0.717607	0.941724	-1.16246	-0.496869
CG16953	0.650605	0.700411	-1.44151	0.090493
CG16957	1.03409	0.679734	-0.860104	-0.85372
CG16972	0.703504	0.99503	-0.658884	-1.03965
CG16974	0.587827	1.10471	-0.816672	-0.87586
CG16979	0.658493	0.90383	-1.29548	-0.26684
CG16985	-0.609866	0.399009	1.21146	-1.00061
CG16986	-0.918167	-0.806521	0.960376	0.764312
CG16989	1.09869	-0.417206	-1.17339	0.49191
CG17002	-0.746401	0.607553	-0.946481	1.08533
CG17019	0.402066	1.21969	-0.677386	-0.944373
CG17028	0.745152	0.940935	-1.10567	-0.580416
CG17029	0.161165	1.27883	-0.331532	-1.10847
CG1703	-0.627669	-1.05773	1.02567	0.659723
CG17032	0.158098	-1.4577	0.596631	0.702966
CG17036	-0.625094	1.47275	-0.625094	-0.22256
CG17059	1.01453	0.648118	-1.12155	-0.541106
CG17065	0.272478	0.769439	-1.46725	0.42533
CG17068	0.420282	1.20467	-0.651371	-0.973579
CG17075	-1.07903	0.766229	-0.618088	0.930889
CG17078	0.781684	0.496886	-1.45313	0.174565
CG17104	-0.5	-0.5	-0.5	1.5
CG17109	-0.620649	1.49417	-0.455666	-0.417859
CG17110	0.496662	1.16872	-0.850837	-0.814549
CG17118	-0.218483	1.45022	-0.828635	-0.403102
CG17119	1.31059	-0.798419	-0.762904	0.250736
CG17124	-0.00741228	-0.27595	1.34244	-1.05908
CG17129	-0.629077	-0.629077	-0.212661	1.47082
CG17141	-0.549045	-1.08696	0.518977	1.11702
CG17162	1.06335	0.640725	-0.793571	-0.9105
CG17163	1.10096	-0.728965	-0.956488	0.584497
CG17167	1.16973	0.294	-0.245013	-1.21872
CG17168	-1.02333	-0.544761	0.322225	1.24587
CG17186	0.696614	-1.47866	0.284952	0.497092
CG17187	1.48001	-0.289009	-0.50388	-0.687125
CG17189	1.30154	0.269148	-0.781553	-0.789133
CG17202	-0.700395	-0.940677	0.447697	1.19337
CG17219	-0.649575	-0.506126	1.48726	-0.331563
CG1722	0.0121636	1.35943	-1.01074	-0.360853
CG17221	1.42862	-0.471511	-0.851839	-0.105272
CG17230	0.890442	0.524827	-1.38961	-0.0256608
CG17233	0.690269	0.98856	-1.10118	-0.577649
CG17249	-0.45233	-1.01362	0.14413	1.32182
CG17258	-1.19488	1.18734	0.288777	-0.281234
CG17260	-0.0984241	-1.34993	0.480106	0.968247
CG17261	-1.06874	0.155153	1.29834	-0.384754
CG17266	0.243337	-1.3497	1.05671	0.049645
CG17270	-0.100485	1.35829	-0.208238	-1.04957
CG17271	-0.605462	-1.09017	0.787186	0.908449
CG17272	1.04184	0.318087	-1.34655	-0.0133768
CG17278	-0.676895	-0.532519	1.47846	-0.269047
CG17292	1.34145	0.182123	-0.819608	-0.70397
CG17294	-0.439296	-1.19219	0.981331	0.650152
CG17327	-0.963783	-0.708953	1.12747	0.545263
CG17328	-1.23976	0.207268	1.18221	-0.149723
CG17333	-0.961192	-0.761676	0.938317	0.784551
CG17343	0.643338	-1.38858	-0.0634211	0.808663
CG17350	-0.511755	1.49979	-0.511755	-0.476281
CG17359	1.0832	-0.539489	-1.10487	0.561153
CG17361	0.142901	-0.941967	-0.542015	1.34108
CG1737	0.897832	0.759737	-1.1773	-0.480268
CG17376	-0.788965	1.29401	-0.788965	0.283923
CG17377	-0.823754	0.445788	-0.823754	1.20172
CG1738	0.330303	-0.83874	1.26865	-0.760218
CG17385	-0.234551	-0.813611	-0.406968	1.45513
CG17387	-0.864915	-0.864915	0.926929	0.8029
CG17440	-0.86368	-0.86368	0.95376	0.7736
CG17454	-0.800717	-0.911144	0.677835	1.03403
CG17486	-0.460493	-1.18846	0.735019	0.913929
CG17490	-0.931858	-0.752115	0.569883	1.11409
CG17493	-1.15402	-0.158847	0.031459	1.28141
CG1750	-0.513822	-1.15338	0.744355	0.922844
CG17508	-0.925481	-0.647447	0.292881	1.28005
CG17528	-0.236097	1.30997	-1.10774	0.0338699
CG17544	-1.14436	-0.197632	0.058259	1.28374
CG17549	-1.30642	-0.0855163	0.297717	1.09422
CG17556	0.782314	0.846653	-1.22945	-0.399517
CG17565	1.08487	-0.9658	-0.724066	0.605001
CG17568	-0.176409	0.149193	-1.20012	1.22733
CG17570	-0.616696	-0.616696	1.47656	-0.243171
CG17574	0.802967	0.923383	-0.784223	-0.942127
CG17593	-0.833282	-0.885659	0.711366	1.00757
CG17597	-0.0346726	1.26301	-1.18391	-0.0444256
CG17598	0.932189	0.770495	-1.06086	-0.641826
CG17600	-1.36855	-0.0612326	0.939831	0.489948
CG17612	0.439039	-0.00791785	-1.38052	0.949396
CG17637	-0.589302	-0.14467	-0.719853	1.45382
CG1764	0.670017	0.414612	-1.48861	0.403985
CG17646	0.528073	1.13993	-0.957655	-0.710349
CG17650	1.48391	-0.359616	-0.426765	-0.697532
CG17652	-0.106073	-0.762104	-0.573651	1.44183
CG17660	0.122342	-0.690137	1.36731	-0.799511
CG17666	-0.774641	-0.774641	1.32224	0.227042
CG17681	-0.905402	-0.739212	0.447183	1.19743
CG17683	-0.721857	-0.942844	0.512698	1.152
CG17684	0.406989	0.164128	-1.43541	0.864297
CG17691	-1.14233	-0.498239	1.04513	0.595439
CG17698	-0.63024	0.581555	-1.03947	1.08816
CG17707	-0.802739	-0.802739	0.343154	1.26233
CG17712	-0.613238	-0.847003	0.081903	1.37834
CG17715	0.641852	1.06424	-0.858299	-0.84779
CG17721	-0.978613	-0.526997	0.19104	1.31457
CG17724	1.16602	0.499662	-0.790982	-0.874696
CG17726	0.0582301	1.00912	-1.37292	0.305567
CG17734	-0.903804	-0.819237	0.9789	0.74414
CG1774	0.686004	1.0288	-0.876078	-0.838724
CG17746	-1.08438	-0.211847	-0.0371403	1.33337
CG17754	0.417909	-0.160002	-1.30507	1.04716
CG17760	-0.914797	-0.795183	0.669501	1.04048
CG17765	1.09129	0.466013	-1.21415	-0.343146
CG17768	-0.909453	-0.81598	0.766503	0.958929
CG17776	0.802746	0.922763	-0.774961	-0.950548
CG17786	0.205723	1.33115	-0.817085	-0.719786
CG17802	-0.935629	-0.35899	-0.113515	1.40813
CG17806	1.37032	-0.00783471	-0.992679	-0.369805
CG17807	-0.831735	1.45298	-0.265424	-0.355823
CG17816	1.36741	-0.11211	-0.221603	-1.03369
CG17829	1.33939	0.107827	-0.994888	-0.45233
CG17834	-0.856386	-0.672322	0.195975	1.33273
CG17839	0.973138	0.751829	-0.862483	-0.862483
CG17841	-0.799281	-0.929544	0.901028	0.827796
CG1785	0.0145569	-0.388842	1.36582	-0.991532
CG17855	-1.07622	-0.588511	0.598103	1.06662
CG17883	-0.902943	-0.761754	0.501577	1.16312
CG1789	-0.947572	-0.673091	1.22008	0.400586
CG17896	0.7333	0.00483992	0.67731	-1.41545
CG17904	-0.996658	-0.713713	0.723653	0.986718
CG17919	0.661967	1.03571	-1.00386	-0.693809
CG1792	-0.0877258	0.907516	-1.36715	0.547364
CG17928	1.16369	0.487376	-0.976026	-0.675036
CG17931	1.18431	0.461804	-0.702036	-0.94408
CG17977	-1.14414	-0.528146	0.918986	0.753303
CG17982	-0.933568	-0.794418	0.817172	0.910814
CG17985	-0.141331	-1.30778	0.393064	1.05605
CG17996	0.561956	1.12313	-0.803677	-0.881411
CG18004	-1.07826	-0.614896	0.732802	0.960349
CG1801	1.45642	-0.158841	-0.572089	-0.725488
CG18011	-0.879176	-0.844395	0.742003	0.981568
CG18048	0.740901	0.845824	-1.28162	-0.305101
CG1806	-0.859501	-0.859501	1.00955	0.709451
CG18081	-0.776787	1.41841	-0.0217374	-0.619882
CG18088	-1.16998	-0.138308	1.26905	0.039236
CG18094	1.48534	-0.396431	-0.692324	-0.39659
CG1812	0.558488	0.929979	-0.146127	-1.34234
CG18131	0.114582	-0.791036	1.37078	-0.694328
CG18135	0.816324	0.833408	-1.19785	-0.45188
CG1814	1.4325	-0.221007	-0.318288	-0.8932
CG1815	1.09358	0.524838	-1.14011	-0.478308
CG18155	-0.0436074	1.33007	-1.09129	-0.195176
CG18171	-0.608545	-0.475404	-0.410966	1.49492
CG18178	-0.727979	-0.68968	1.41222	0.00544153
CG18180	0.70669	1.00303	-0.983188	-0.726536
CG18213	0.90166	0.774401	-1.14029	-0.535769
CG1824	1.35794	-0.704223	0.145589	-0.799302
CG18249	-0.163292	-0.276357	-0.963459	1.40311
CG18259	0.328596	1.26519	-0.69386	-0.899928
CG18262	1.47024	-0.312528	-0.766697	-0.391016
CG1827	1.04212	0.668825	-0.894127	-0.816819
CG18273	0.929467	0.764631	-0.605754	-1.08834
CG18278	0.814651	0.907919	-0.980459	-0.742111
CG18281	-1.26676	-0.00793281	1.17717	0.0975225
CG18324	1.38134	0.0898685	-0.707274	-0.763933
CG18335	0.445563	1.18674	-0.990669	-0.641635
CG18336	-0.657343	1.38566	-0.801553	0.0732379
CG18343	-0.0869235	0.670172	-1.38094	0.797693
CG1835	-1.29019	0.431201	-0.195219	1.05421
CG18371	-0.69938	-0.290704	1.47897	-0.488885
CG1840	0.999484	-0.351048	-1.23733	0.588898
CG18428	-0.969907	-0.7336	1.03903	0.664476
CG18446	0.847602	0.865086	-1.03876	-0.673933
CG18449	1.05088	-0.49585	-1.14231	0.58729
CG1847	-0.365058	1.28899	-1.08583	0.161907
CG18473	-0.0537368	1.40699	-0.45098	-0.902276
CG18476	0.884531	-0.78741	-0.940994	0.843873
CG18477	-0.501408	1.5	-0.501408	-0.497181
CG18480	-0.750459	-0.750459	1.36171	0.139214
CG18507	-0.866025	-0.866025	0.865827	0.866223
CG18508	-0.411611	0.927279	-1.21642	0.700752
CG18528	-0.361967	1.49303	-0.575754	-0.555304
CG18547	-0.670587	-0.572077	-0.230412	1.47308
CG18549	0.499587	1.16193	-0.930824	-0.730689
CG18557	-0.831665	-0.74678	0.286774	1.29167
CG18558	-0.671458	-0.635424	-0.150117	1.457
CG18563	0.652254	0.379162	-1.4901	0.458687
CG18568	-1.29366	-0.154116	0.367067	1.08071
CG18596	1.38181	0.0849265	-0.795582	-0.671152
CG18600	-1.01745	-0.516737	1.27744	0.256749
CG18605	1.49844	-0.542623	-0.51946	-0.436354
CG18622	-0.610994	-1.08332	0.941361	0.752954
CG18628	-1.42126	0.328637	0.917192	0.175431
CG18659	-0.453464	-1.0908	1.22608	0.318187
CG18661	-0.0783999	1.43689	-0.736026	-0.622465
CG18662	-0.549217	1.40484	-0.851333	-0.0042901
CG18731	-1.14311	0.135331	-0.260041	1.26782
CG18744	0.396231	1.2319	-0.814068	-0.814068
CG18747	-0.451393	-0.507752	1.499	-0.539852
CG18749	-0.984035	-0.733196	0.759473	0.957757
CG18754	-0.842599	1.45011	-0.340368	-0.267141
CG18764	-1.11462	0.759333	-0.569989	0.925279
CG18766	-0.241571	0.984929	-1.29235	0.548991
CG18787	1.19175	0.441009	-0.978095	-0.654661
CG18789	0.33639	1.25403	-0.952609	-0.637806
CG18808	1.45283	-0.133521	-0.635524	-0.683786
CG18809	0.392134	-1.27639	1.08482	-0.200564
CG18815	-1.09237	-0.576705	0.632986	1.03609
CG1882	0.644051	0.927982	-1.28018	-0.291849
CG18858	0.957868	0.767353	-0.810335	-0.914886
CG18870	-0.817716	1.01766	-0.898633	0.698692
CG1888	1.31265	0.121875	-0.375826	-1.0587
CG1890	-0.95974	-0.721574	0.571565	1.10975
CG1896	-0.111808	-0.713626	1.44654	-0.621103
CG1902	1.00722	0.697486	-1.004	-0.700709
CG1907	-0.747632	-0.863613	0.359998	1.25125
CG1910	0.505679	-1.00432	1.1469	-0.648266
[truncated: 6,543 more rows]

## Sheet: LM2
gene	Unwouned_AverageExpression	Wounded_AverageExpression	Wasp inf. 24h_AverageExpression	Wasp inf. 48h_AverageExpression
128up	-1.3313	-0.193292	0.880841	0.643746
14-3-3epsilon	-0.619595	-1.07412	0.728503	0.965216
14-3-3zeta	0.706331	1.00296	-0.985673	-0.723616
140up	-1.08929	1.33417	-0.0807539	-0.164126
18SrRNA-Psi:CR41602	1.42449	-0.513954	-0.0730627	-0.837469
18w	-0.5	-0.5	-0.5	1.5
26-29-p	-1.07679	1.30139	0.134362	-0.358965
28SrRNA-Psi:CR40741	1.48473	-0.295131	-0.573356	-0.616238
28SrRNA-Psi:CR41609	1.49537	-0.38776	-0.561154	-0.546457
28SrRNA-Psi:CR45853	-0.507059	1.49992	-0.507059	-0.485807
28SrRNA-Psi:CR45855	-1.135	-0.357879	1.23087	0.262015
28SrRNA-Psi:CR45859	1.38865	-0.953562	-0.0335488	-0.401543
28SrRNA-Psi:CR45860	1.49001	-0.333853	-0.572409	-0.583748
312	-0.829264	-0.763595	1.27635	0.31651
4E-T	-1.18561	1.10427	-0.390368	0.471708
5.8SrRNA-Psi:CR45854	-0.5	-0.5	-0.5	1.5
5.8SrRNA-Psi:CR45863	-0.830679	-0.830679	1.17701	0.48435
5PtaseI	-1.42614	0.855354	0.0961958	0.474591
a	-0.605358	-0.605358	1.48119	-0.270475
A16	-1.36245	-0.136026	0.713652	0.784819
a6	-1.01315	-0.281136	-0.0797952	1.37409
AANATL2	-0.636947	-0.476622	-0.377858	1.49143
Aatf	-1.43097	0.159577	0.879267	0.392123
aay	-1.16192	-0.421535	0.461137	1.12232
ab	-0.525321	1.49901	-0.525321	-0.448372
ABCA	-0.784231	1.4248	-0.593943	-0.0466218
ABCB7	-1.37772	0.981636	0.370995	0.0250925
ABCD	-1.39231	0.671362	-0.0583659	0.779316
abd-A	-0.5	-0.5	-0.5	1.5
Abi	1.49047	-0.383839	-0.650448	-0.456179
Abl	-1.37224	0.998846	0.0292797	0.344112
abo	-1.28255	0.978084	0.571794	-0.267324
Abp1	-1.01812	1.32527	-0.436355	0.129202
abs	-1.09234	-0.604655	0.874028	0.822963
Ac13E	-0.5	-0.5	-0.5	1.5
Ac3	-0.645448	-0.645448	1.46202	-0.171127
Ac76E	-0.865365	1.44287	-0.324098	-0.253411
Ac78C	-0.272472	-1.29798	0.722564	0.847887
Acbp1	1.43606	-0.879485	-0.209869	-0.346703
Acbp3	-0.69711	-0.69711	1.4238	-0.0295786
Acbp5	-0.523953	1.49912	-0.523953	-0.451212
Acbp6	-0.864961	-0.864961	0.804256	0.925666
ACC	-0.686204	1.48586	-0.371511	-0.428148
AcCoAS	-1.33459	1.03478	0.377009	-0.0772056
Ace	-0.5	-0.5	-0.5	1.5
Acer	-0.516043	1.49961	-0.516043	-0.467521
achi	-0.795121	0.309771	-0.795121	1.28047
acj6	-0.5	-0.5	-0.5	1.5
Ack	-0.836388	-0.836388	1.15405	0.518723
Ack-like	-1.39354	0.471177	0.914314	0.00805001
Acn	-1.27947	-0.31158	0.78642	0.804628
Acox57D-d	-0.5	-0.5	-0.5	1.5
Acox57D-p	-1.22462	1.19379	0.208659	-0.177832
Acp95EF	-0.5	1.5	-0.5	-0.5
Acph-1	-1.05046	1.35967	-0.158719	-0.150496
Acsl	-1.2901	1.02509	0.48585	-0.220839
Act42A	-1.40951	-0.00171188	0.612013	0.799205
Act57B	-1.23977	0.0350605	-0.00429879	1.20901
Act5C	1.35055	0.00806793	-1.03499	-0.323637
Act79B	-0.607171	-0.607171	1.48049	-0.266147
Act87E	-0.773559	-0.773559	1.32421	0.222913
Act88F	-0.744324	-0.54162	1.45716	-0.171216
Actbeta	-0.5	-0.5	-0.5	1.5
Actn	-1.00902	1.1804	-0.621346	0.449963
Acyp2	-1.48351	0.651983	0.29662	0.534909
Ada	-0.791286	-0.791286	1.28901	0.293557
Ada1-1	-0.679916	-0.679916	1.43849	-0.0786533
Ada1-2	-0.705741	1.41557	-0.705741	-0.00409024
Ada2a	-1.25804	-0.350822	0.809419	0.799441
Ada2b	-1.29089	0.0196543	0.123164	1.14807
AdamTS-A	-1.03978	1.29575	0.193827	-0.449795
Adar	-1.30155	1.13491	0.128427	0.0382176
Adck1	-0.775405	1.32084	-0.775405	0.229973
Adck5	-0.850942	1.07853	-0.850942	0.623352
ADD1	-1.14121	0.608036	-0.503416	1.03659
AdenoK	-0.98693	1.31224	0.191663	-0.516973
Adf1	-1.38888	-0.0688019	0.772797	0.684884
Adgf-A	1.02974	0.633808	-0.554075	-1.10947
Adh	-0.5	-0.5	-0.5	1.5
Adi1	-1.1997	-0.0932739	0.0480975	1.24487
AdipoR	1.49128	-0.621353	-0.511171	-0.358757
Adk1	-1.34538	-0.173639	0.704404	0.81462
Adk2	-1.33621	0.0566625	1.08289	0.196661
Adk3	-1.45373	0.476354	0.790449	0.186929
AdoR	-0.917807	-0.757927	0.53859	1.13714
adp	-1.40695	0.947467	0.13695	0.322537
AdSL	1.49661	-0.404978	-0.533147	-0.558485
AdSS	-1.07739	1.34309	-0.129069	-0.136631
Aduk	-1.10075	0.0900799	-0.291375	1.30205
Ady43A	1.04926	-1.0308	-0.655894	0.637435
Aef1	-1.21906	-0.405385	0.689441	0.935003
aft	-0.936137	1.4099	-0.345488	-0.128279
Afti	-1.11183	-0.482832	1.15735	0.437316
Ag5r2	-0.5	-0.5	-0.5	1.5
AGBE	-0.641163	-0.37163	-0.477963	1.49076
AgmNAT	-0.577506	1.49018	-0.577506	-0.335168
ago	1.49814	-0.530891	-0.429157	-0.538095
AGO1	-1.45211	0.784339	0.170744	0.497028
AGO2	-1.4686	0.763004	0.43065	0.274941
AGO3	-1.18391	1.24237	-0.192261	0.133803
Agpat1	-0.522685	1.49921	-0.522685	-0.453841
Agpat3	-1.46682	0.69126	0.574685	0.200871
Agpat4	-0.5	-0.5	-0.5	1.5
agt	-0.527117	1.49971	-0.480975	-0.491616
AhcyL1	-1.46015	0.184661	0.738763	0.53673
AIF	-1.15062	1.17866	0.364419	-0.392463
AIMP1	-1.46638	0.316339	0.78521	0.364832
AIMP2	-1.44964	0.715384	0.609194	0.125065
AIMP3	-1.46701	0.238812	0.478811	0.74939
Ak6	-1.40741	0.633903	-0.0121342	0.785637
Akap200	0.757262	-1.45895	0.189824	0.511859
Akh	-0.837424	-0.837424	0.52527	1.14958
akirin	1.47988	-0.678721	-0.51967	-0.281488
Akt1	-1.39437	0.325027	0.0997199	0.969618
Aladin	-0.595247	1.49592	-0.484262	-0.416411
Alas	-1.42572	0.154347	0.895803	0.375565
alc	-1.37869	0.617573	-0.0821336	0.843251
Aldh	-1.40698	0.721958	-0.021204	0.706221
Aldh-III	1.49289	-0.367577	-0.523992	-0.601325
Aldh7A1	-0.935055	0.440205	1.1986	-0.703747
Alg-2	-1.48203	0.279981	0.563955	0.638091
Alg1	-1.21023	1.22709	0.112929	-0.129785
Alg10	-1.38083	0.11091	0.264367	1.00555
Alg11	-1.45428	0.382876	0.822506	0.248901
Alg14	-1.08546	-0.590584	1.023	0.653042
Alg2	1.49381	-0.610963	-0.494039	-0.388811
Alg9	-1.40245	0.266655	0.966023	0.169775
Alh	-0.92796	0.131028	1.34825	-0.551316
alien	-1.49045	0.395348	0.441211	0.653896
ALiX	-1.08436	1.33778	-0.161336	-0.0920878
Alk	-0.5	-0.5	-0.5	1.5
AlkB	-1.36131	0.366237	-0.0111908	1.00627
Alp12	-0.995653	1.29888	-0.522838	0.219611
alph	1.26576	-1.18066	-0.0308023	-0.054301
alpha-Cat	-1.45731	0.159479	0.583172	0.714656
alpha-Est1	-0.5	-0.5	-0.5	1.5
alpha-Est10	-0.543707	1.497	-0.543707	-0.409585
alpha-Est3	0	0	0	0
alpha-Est7	-0.736031	1.38141	-0.736031	0.0906499
alpha-Est8	-1.44615	0.230279	0.849249	0.366618
alpha-Est9	-1.02295	1.35049	0.0312774	-0.358818
alpha-Man-Ib	-1.17308	1.23904	-0.240943	0.174988
alpha-Man-Ic	-0.567972	-0.567972	1.49253	-0.356589
alpha-Man-IIb	-0.850908	-0.774082	1.23467	0.390325
alpha-PheRS	-1.4479	0.434778	0.823859	0.18926
alpha-Spec	-1.03717	1.35919	-0.0491575	-0.27287
alpha4GT1	-1.43553	0.858895	0.421182	0.155452
alphaCOP	-1.20515	1.2402	0.0491796	-0.0842355
alphaSnap	-1.48852	0.557755	0.323881	0.606887
alphaTub67C	-0.5	-0.5	-0.5	1.5
alphaTub84B	-1.42552	0.0547942	0.572522	0.798199
alphaTub84D	-1.43292	0.834347	0.488307	0.110266
alphaTub85E	-0.498225	-1.01629	0.222444	1.29207
Alr	-0.645672	1.48752	-0.51046	-0.331389
Als2	-0.713757	1.46481	-0.552773	-0.198283
alt	-1.49327	0.384447	0.616133	0.492686
Ama	-0.513021	1.49974	-0.513021	-0.4737
Amacr	-1.06708	-0.402289	0.177926	1.29145
amn	-0.729168	1.47848	-0.403737	-0.345571
AMPdeam	-0.973831	-0.212054	1.40026	-0.214375
Amph	-0.765329	-0.765329	0.192141	1.33852
AMPKalpha	-1.29039	1.12539	-0.0830071	0.248011
Amun	-1.28221	-0.293136	0.666913	0.90843
amx	-1.2122	-0.00576463	-0.0190406	1.237
ana1	-0.614033	1.4777	-0.614033	-0.249638
ana2	-0.561692	-0.561692	1.4939	-0.370512
ana3	-0.516209	1.4996	-0.516209	-0.467182
Ance	-1.43709	0.420582	0.855559	0.160948
Ance-2	-1.33304	0.877185	0.646051	-0.190198
Ance-3	0	0	0	0
Ance-4	-0.5	-0.5	-0.5	1.5
Ance-5	-0.574153	1.49785	-0.471225	-0.452474
anchor	-1.37936	1.00561	0.0966898	0.277057
angel	-1.14756	1.02772	-0.496728	0.616564
Ank	-1.48388	0.693958	0.347373	0.44255
Ank2	-0.537158	1.49785	-0.537158	-0.42353
anne	-1.32353	1.07359	-0.0545094	0.304453
anox	-1.39439	0.349716	0.962618	0.0820593
Ant2	-0.714047	1.40707	-0.714047	0.0210285
Antp	-0.5	-0.5	-0.5	1.5
antr	-0.667843	1.44757	-0.667843	-0.111881
AnxB10	-1.14486	1.25799	-0.280571	0.167438
AnxB11	-1.42796	0.90835	0.239222	0.280384
AnxB9	-1.23234	0.801017	-0.395357	0.826681
aop	-1.45795	0.800428	0.235102	0.422415
aos	-1.32808	0.444682	1.01103	-0.127627
Aos1	-1.38582	0.213843	1.00252	0.169464
AOX1	-0.542464	1.49717	-0.542464	-0.412244
AOX3	-0.56406	1.4934	-0.56406	-0.365279
ap	0	0	0	0
AP-1-2beta	1.44354	-0.103953	-0.733646	-0.605938
AP-1gamma	-1.21375	1.09469	-0.341331	0.460392
AP-1mu	-1.32717	1.05121	-0.0805603	0.35652
AP-1sigma	-1.48836	0.370033	0.453013	0.665313
AP-2alpha	-1.46017	0.303874	0.809524	0.346767
AP-2mu	-1.36987	1.02864	0.110913	0.230313
AP-2sigma	-1.48105	0.280978	0.539016	0.661058
Apc	-1.46168	0.690042	0.597512	0.174125
APC10	-1.38015	0.309148	0.997069	0.0739337
Apc2	-0.569718	1.49811	-0.456422	-0.471973
APC4	-0.989217	1.34897	-0.441619	0.0818665
ApepP	-1.41244	0.896185	0.443352	0.0729009
Apf	-1.46113	0.189836	0.533258	0.738036
aph-1	-1.30148	-0.260802	0.875425	0.686855
aPKC	-1.43026	0.892752	0.188431	0.349073
Apl	-0.915998	1.41284	-0.104554	-0.39229
Aplip1	-0.5	-0.5	-0.5	1.5
Apoltp	-0.5	-0.5	-0.5	1.5
app	-1.10248	1.32082	-0.199034	-0.0193085
APP-BP1	-1.37684	-0.0953994	0.66037	0.811868
Appl	0	0	0	0
Aprt	-0.999373	-0.535874	1.28512	0.250129
Aps	-1.41357	0.0133617	0.596757	0.803448
apt	-0.725901	-0.725901	1.39384	0.0579665
aqz	-1.49152	0.489812	0.370932	0.630772
aralar1	-1.43676	0.548285	0.790942	0.0975338
Arc1	0.971408	-1.1203	-0.554122	0.703018
Arc2	-1.41206	0.00431179	0.791046	0.6167
Arc42	-1.43105	0.801655	0.0787275	0.550671
Archease	-1.44812	0.372228	0.23328	0.842608
Arf102F	-1.42965	0.050429	0.724479	0.654742
Arf51F	1.25463	-1.18711	-0.118611	0.0510869
Arf79F	1.24456	-1.19483	-0.130223	0.0804911
ArfGAP1	-1.36447	0.967788	-0.049564	0.446251
ArfGAP3	-1.41879	0.919115	0.156458	0.343213
Arfip	-1.49274	0.503989	0.374171	0.614583
Arfrp1	-1.14621	-0.213511	0.0814484	1.27827
arg	-0.833645	1.16542	-0.833645	0.501873
Argk	-0.5	-0.5	-0.5	1.5
Argl	-0.687821	-0.264505	1.47703	-0.524706
ArgRS-m	-1.32778	1.01722	-0.122242	0.432797
ari-1	-1.34369	-0.18067	0.764396	0.759966
ari-2	-1.09924	0.286735	-0.424219	1.23673
Arl1	-1.45691	0.149308	0.664066	0.643536
Arl2	-1.09573	-0.561913	0.594572	1.06307
Arl4	-1.30551	-0.258999	0.733595	0.83091
Arl5	-1.47956	0.366369	0.387672	0.725521
Arl6IP1	1.49076	-0.603644	-0.543003	-0.344108
arm	-1.1966	1.155	-0.320702	0.362304
armi	-0.608761	1.47986	-0.608761	-0.262342
Arp1	-1.46076	0.752316	0.197321	0.511127
Arp10	-1.49154	0.382533	0.638211	0.470799
Arp2	-1.39878	0.948443	0.0794376	0.370897
Arp3	-0.0426133	-1.36561	0.437885	0.970337
Arp5	-0.96808	1.36196	-0.45219	0.0583055
Arp6	-1.39931	0.975797	0.217917	0.205594
Arp8	-0.962953	-0.135905	1.40105	-0.30219
Arpc1	1.47519	-0.667811	-0.564797	-0.242582
Arpc2	-1.46188	0.174973	0.597572	0.689339
Arpc3A	-1.48223	0.316433	0.690897	0.474899
Arpc3B	-1.48889	0.333185	0.531192	0.624516
Arpc4	-1.44034	0.0855887	0.692212	0.662535
Arpc5	-1.39723	-0.0459243	0.767921	0.675232
arr	-0.832711	0.0597634	1.38755	-0.6146
Ars2	-1.39317	-0.0582655	0.759933	0.691504
Art1	-1.21803	1.231	0.0152469	-0.0282162
Art3	-0.913546	1.03466	0.676869	-0.797978
Art4	-0.874424	1.36694	-0.596669	0.104154
Art7	-0.850466	1.38474	-0.596138	0.0618669
Art8	-0.929728	-0.195605	1.41828	-0.29295
Arts	-0.737693	1.47719	-0.358025	-0.381476
aru	-1.44638	0.114725	0.7297	0.601957
Arv1	-1.49067	0.488845	0.637146	0.364676
arx	-1.28963	1.13301	-0.0646339	0.221254
Asap	-1.22977	0.665647	0.947445	-0.383325
Asator	-1.17532	0.171454	-0.234728	1.2386
Asciz	-1.04881	1.10951	-0.607903	0.547211
asf1	-1.45784	0.498584	0.191518	0.767741
ash1	-1.28125	0.156675	-0.0299671	1.15454
ash2	-1.4169	0.927392	0.165581	0.323924
asl	-0.65536	1.45599	-0.65536	-0.145268
AsnRS-m	-0.756842	-0.756842	1.35214	0.161544
asp	-0.5	-0.5	-0.5	1.5
Asph	-0.817991	1.22021	-0.817991	0.415772
AspRS-m	-0.744321	1.41466	-0.666878	-0.00345665
asrij	-1.45411	0.831845	0.311521	0.310742
asRNA:ASTR	-0.5	-0.5	-0.5	1.5
asRNA:CR17025	-0.5	-0.5	-0.5	1.5
asRNA:CR31144	-0.730818	-0.730818	1.38794	0.073696
asRNA:CR31514	-0.576887	1.49034	-0.576887	-0.336571
asRNA:CR31912	-0.5	-0.5	-0.5	1.5
asRNA:CR32252	-0.5	-0.5	-0.5	1.5
asRNA:CR42254	-0.74962	-0.74962	0.136317	1.36292
asRNA:CR42547	-0.717331	-0.717331	1.40353	0.0311303
asRNA:CR42738	1.43761	-0.882557	-0.264981	-0.290076
asRNA:CR43159	-0.5	-0.5	-0.5	1.5
asRNA:CR43257	-1.14499	-0.346183	0.267393	1.22378
asRNA:CR43425	-0.5	-0.5	-0.5	1.5
asRNA:CR43465	-0.83395	1.45145	-0.368594	-0.248909
asRNA:CR43466	-0.939467	-0.676927	0.388191	1.2282
asRNA:CR43468	-0.975241	1.17993	-0.666137	0.461447
asRNA:CR43474	-0.52093	-0.52093	1.49933	-0.45747
asRNA:CR43629	-0.939564	1.41308	-0.30129	-0.172223
asRNA:CR43683	-0.5	-0.5	-0.5	1.5
asRNA:CR43723	-0.5	-0.5	-0.5	1.5
asRNA:CR43730	-0.523395	1.49916	-0.523395	-0.45237
asRNA:CR43767	-0.5	-0.5	-0.5	1.5
asRNA:CR43786	-0.5	-0.5	-0.5	1.5
asRNA:CR43809	-0.534682	1.49813	-0.534682	-0.428764
asRNA:CR43812	-0.598184	1.48902	-0.326655	-0.564178
asRNA:CR43824	-0.5	-0.5	-0.5	1.5
asRNA:CR43833	-0.5	1.5	-0.5	-0.5
asRNA:CR43864	-0.5	-0.5	-0.5	1.5
asRNA:CR43868	0	0	0	0
asRNA:CR43875	-0.513125	1.49974	-0.513125	-0.473488
asRNA:CR43889	-0.5	-0.5	-0.5	1.5
asRNA:CR43906	-0.798758	1.27201	-0.798758	0.325503
asRNA:CR43916	-0.761275	1.41023	-0.656995	0.00803778
asRNA:CR43933	-0.5	-0.5	-0.5	1.5
asRNA:CR43944	-0.531387	1.49847	-0.531387	-0.435698
asRNA:CR43957	-1.47261	0.734724	0.467344	0.270541
asRNA:CR43964	-0.5	1.5	-0.5	-0.5
asRNA:CR44019	-0.791418	-0.791418	1.28873	0.294109
asRNA:CR44021	-0.67594	1.44158	-0.67594	-0.0897028
asRNA:CR44029	-0.765071	-0.765071	0.191197	1.33895
asRNA:CR44030	-0.938781	-0.680252	0.393995	1.22504
asRNA:CR44031	1.48944	-0.331361	-0.554662	-0.603418
asRNA:CR44047	-0.5	-0.5	-0.5	1.5
asRNA:CR44049	0	0	0	0
asRNA:CR44054	-0.522339	1.49923	-0.522339	-0.454556
asRNA:CR44064	-0.532974	1.49831	-0.532974	-0.432363
asRNA:CR44065	-0.515409	1.49964	-0.515409	-0.468821
asRNA:CR44093	-0.800829	1.26703	-0.800829	0.334626
asRNA:CR44095	-0.785164	1.46557	-0.385671	-0.294738
asRNA:CR44114	-0.718385	-0.718385	1.40238	0.034393
asRNA:CR44116	-0.5	-0.5	-0.5	1.5
asRNA:CR44119	-0.790797	1.29008	-0.790797	0.291517
asRNA:CR44124	-0.597271	-0.597271	1.48414	-0.289597
asRNA:CR44134	-1.01536	1.37088	-0.0625969	-0.292932
asRNA:CR44137	-0.58028	1.48943	-0.58028	-0.328867
asRNA:CR44147	-0.633938	1.46835	-0.633938	-0.200474
asRNA:CR44160	-0.855987	-0.855987	1.04193	0.670046
asRNA:CR44168	-0.580626	1.48933	-0.580626	-0.32808
asRNA:CR44169	-0.514526	1.49968	-0.514526	-0.470626
asRNA:CR44179	1.46719	-0.196986	-0.665605	-0.604594
asRNA:CR44201	-0.627262	-0.627262	1.47171	-0.217182
asRNA:CR44224	-0.681564	1.48145	-0.297754	-0.502128
asRNA:CR44266	-0.524721	1.49906	-0.524721	-0.449618
asRNA:CR44267	0	0	0	0
asRNA:CR44291	-0.678471	1.43962	-0.678471	-0.0826827
asRNA:CR44321	-0.859684	-0.859684	0.711741	1.00763
asRNA:CR44340	-0.5	-0.5	-0.5	1.5
asRNA:CR44367	-0.53321	1.49903	-0.449757	-0.516062
asRNA:CR44368	-0.570686	-0.570686	1.4919	-0.350527
asRNA:CR44372	-0.859645	-0.859645	0.711249	1.00804
asRNA:CR44375	-0.5	-0.5	-0.5	1.5
asRNA:CR44381	-0.5	-0.5	-0.5	1.5
asRNA:CR44382	0	0	0	0
asRNA:CR44386	-0.787768	-0.787768	0.279001	1.29653
asRNA:CR44390	-0.5	-0.5	-0.5	1.5
asRNA:CR44429	-0.571648	1.49167	-0.571648	-0.348372
asRNA:CR44431	-0.514766	1.49967	-0.514766	-0.470137
asRNA:CR44512	-0.5	-0.5	-0.5	1.5
asRNA:CR44690	-0.605502	1.48114	-0.605502	-0.270133
asRNA:CR44704	-0.848096	1.44637	-0.3691	-0.229171
asRNA:CR44793	-0.865654	-0.865654	0.829776	0.901531
asRNA:CR44806	-0.561244	1.49399	-0.561244	-0.3715
asRNA:CR44807	-0.5	1.5	-0.5	-0.5
asRNA:CR44841	-0.5	1.5	-0.5	-0.5
asRNA:CR44843	-0.599652	-0.599652	1.4833	-0.283997
asRNA:CR44849	0	0	0	0
asRNA:CR44891	-0.691727	-0.691727	1.42863	-0.0451773
asRNA:CR44910	-0.5	-0.5	-0.5	1.5
asRNA:CR44911	-0.5	-0.5	-0.5	1.5
asRNA:CR44959	-0.5	-0.5	-0.5	1.5
asRNA:CR44960	-0.5	-0.5	-0.5	1.5
asRNA:CR44961	-0.5	-0.5	-0.5	1.5
asRNA:CR44962	-0.64602	1.46169	-0.64602	-0.169649
asRNA:CR44968	-0.743092	-0.743092	1.37208	0.114101
asRNA:CR44969	-0.505262	1.49996	-0.505262	-0.489434
asRNA:CR44972	-0.965606	-0.69011	0.495704	1.16001
asRNA:CR44976	-0.909016	1.40693	-0.0614802	-0.436429
asRNA:CR44981	-0.5	-0.5	-0.5	1.5
asRNA:CR44987	-1.28761	-0.256414	0.566723	0.977306
asRNA:CR44996	-0.5	-0.5	-0.5	1.5
asRNA:CR45000	-0.5	-0.5	-0.5	1.5
asRNA:CR45007	-0.624263	1.47314	-0.624263	-0.224613
asRNA:CR45009	-0.5	-0.5	-0.5	1.5
asRNA:CR45026	-0.5	-0.5	-0.5	1.5
asRNA:CR45028	-0.514025	1.4997	-0.514025	-0.471651
asRNA:CR45044	-0.513618	1.49972	-0.513618	-0.472483
asRNA:CR45053	-0.872489	1.43352	-0.395387	-0.165647
asRNA:CR45108	-0.5	-0.5	-0.5	1.5
asRNA:CR45124	-0.830302	-0.830302	0.482167	1.17844
asRNA:CR45126	-0.697548	1.42339	-0.697548	-0.0282986
asRNA:CR45131	-0.5	-0.5	-0.5	1.5
asRNA:CR45132	-0.5	-0.5	-0.5	1.5
asRNA:CR45135	-0.5	-0.5	-0.5	1.5
asRNA:CR45136	-0.5	-0.5	-0.5	1.5
asRNA:CR45139	-0.506395	1.49994	-0.506395	-0.487148
asRNA:CR45140	-0.840366	-0.840366	0.544447	1.13629
asRNA:CR45141	-0.52012	1.49938	-0.52012	-0.459139
asRNA:CR45142	-0.568046	1.49819	-0.456181	-0.473965
asRNA:CR45145	-0.5	-0.5	-0.5	1.5
asRNA:CR45160	-0.525441	1.4997	-0.476561	-0.497698
asRNA:CR45164	-0.627777	-0.627777	-0.215901	1.47145
asRNA:CR45171	-0.5	-0.5	-0.5	1.5
asRNA:CR45175	-0.720246	-0.720246	1.40031	0.0401783
asRNA:CR45182	-0.5	-0.5	-0.5	1.5
asRNA:CR45189	-0.5	-0.5	-0.5	1.5
asRNA:CR45190	-1.02894	1.34915	-0.34694	0.0267276
asRNA:CR45195	-0.515195	1.49965	-0.515195	-0.469259
asRNA:CR45198	-0.5	-0.5	-0.5	1.5
asRNA:CR45202	-0.5	-0.5	-0.5	1.5
asRNA:CR45208	-0.5	-0.5	-0.5	1.5
asRNA:CR45210	1.49985	-0.498723	-0.518119	-0.483003
asRNA:CR45214	-0.5	-0.5	-0.5	1.5
asRNA:CR45264	-0.582446	1.49717	-0.436357	-0.478365
asRNA:CR45275	1.49966	-0.470442	-0.519845	-0.509374
asRNA:CR45350	-0.666968	1.46941	-0.20881	-0.593629
asRNA:CR45366	-0.566817	-0.566817	1.4928	-0.359161
asRNA:CR45367	-0.509861	1.49985	-0.509861	-0.480132
asRNA:CR45396	-0.864827	-0.79583	0.484036	1.17662
asRNA:CR45397	-0.5	-0.5	-0.5	1.5
asRNA:CR45445	-0.5	-0.5	-0.5	1.5
asRNA:CR45466	-1.08262	1.27093	0.218053	-0.406365
asRNA:CR45467	-0.857966	-0.857966	0.691264	1.02467
asRNA:CR45468	-0.5	-0.5	-0.5	1.5
asRNA:CR45479	-0.5	-0.5	-0.5	1.5
asRNA:CR45485	0	0	0	0
asRNA:CR45501	-0.943098	-0.517292	0.107055	1.35333
asRNA:CR45518	-0.5	-0.5	-0.5	1.5
asRNA:CR45520	-0.521699	1.49928	-0.521699	-0.455881
asRNA:CR45528	-0.5	-0.5	-0.5	1.5
asRNA:CR45549	-0.639511	1.46537	-0.639511	-0.186353
asRNA:CR45604	-0.515034	1.49966	-0.515034	-0.469587
asRNA:CR45612	-0.855661	1.24643	0.369373	-0.760143
asRNA:CR45620	-0.555557	1.49508	-0.555557	-0.383971
asRNA:CR45683	-1.05055	-0.245803	1.35375	-0.0573893
asRNA:CR45686	-0.5	1.5	-0.5	-0.5
asRNA:CR45714	-0.5	-0.5	-0.5	1.5
asRNA:CR45778	0	0	0	0
asRNA:CR45789	-0.600895	1.48285	-0.600895	-0.281063
asRNA:CR45798	-0.665546	1.48791	-0.361028	-0.461336
asRNA:CR45804	-0.5	-0.5	-0.5	1.5
asRNA:CR45806	-0.52124	1.49931	-0.52124	-0.456829
asRNA:CR45813	-0.5	-0.5	-0.5	1.5
asRNA:CR45814	-0.564314	1.49335	-0.564314	-0.364718
asRNA:CR45815	-0.5	-0.5	-0.5	1.5
asRNA:CR45822	-0.830323	-0.830323	1.17836	0.482288
asRNA:CR45827	-0.548849	-0.548849	1.49623	-0.398531
asRNA:CR45831	-0.5	-0.5	-0.5	1.5
asRNA:CR45835	-0.770898	-0.770898	1.32896	0.212836
asRNA:CR45865	-1.45415	0.390457	0.242664	0.821033
asRNA:CR45871	-0.5	-0.5	-0.5	1.5
asRNA:CR45873	-0.730183	1.38872	-0.730183	0.0716487
asRNA:CR45874	1.4882	-0.516181	-0.333653	-0.638361
asRNA:CR45889	-0.625534	1.47254	-0.625534	-0.221468
asRNA:CR45891	-0.5	-0.5	-0.5	1.5
asRNA:CR45895	-0.881349	1.40365	-0.502594	-0.0197074
asRNA:CR45896	-0.5	-0.5	-0.5	1.5
asRNA:CR45907	-0.777659	-0.777659	1.31663	0.238686
asRNA:CR45908	-1.09001	0.993082	-0.592227	0.689154
asRNA:CR45912	-0.5	-0.5	-0.5	1.5
asRNA:CR45925	1.48104	-0.27458	-0.644228	-0.56223
asRNA:CR45926	-0.580341	1.49741	-0.443395	-0.473675
asRNA:CR45928	-1.48851	0.33869	0.509328	0.640487
asRNA:CR45929	-0.507756	1.49991	-0.507756	-0.484398
asRNA:CR45943	-0.864279	-0.864279	0.786542	0.942016
asRNA:CR45952	-0.624005	-0.624005	1.47326	-0.225252
asRNA:CR45968	-0.5	-0.5	-0.5	1.5
asRNA:CR45969	-0.638728	-0.638728	-0.188348	1.4658
asRNA:CR45970	-0.5	-0.5	-0.5	1.5
asRNA:CR45999	-0.952418	1.35771	-0.491959	0.0866717
asRNA:CR46020	-0.5	-0.5	-0.5	1.5
asRNA:CR46033	0	0	0	0
asRNA:CR46044	-0.5	-0.5	-0.5	1.5
asRNA:CR46048	-0.532074	1.4984	-0.532074	-0.434256
asRNA:CR46050	-0.5	-0.5	-0.5	1.5
asRNA:CR46055	-0.841466	-0.841466	1.13107	0.55186
asRNA:CR46067	1.42171	-0.0236499	-0.720334	-0.677723
asRNA:CR46081	-0.509754	1.49986	-0.509754	-0.480348
asRNA:CR46089	-0.58974	-0.58974	1.48663	-0.307151
asRNA:CR46093	-0.899373	-0.0919917	1.41526	-0.4239
asRNA:CR46096	-0.5	-0.5	-0.5	1.5
asRNA:CR46097	-0.510085	1.49985	-0.510085	-0.479675
asRNA:CR46099	-0.763011	-0.286295	1.46946	-0.420156
asRNA:CR46104	-0.510663	1.49988	-0.481833	-0.50738
asRNA:CR46109	-0.6528	-0.6528	1.4576	-0.152002
ast	-0.94713	1.38936	-0.414542	-0.0276914
AstA	-0.5	-0.5	-0.5	1.5
AstA-R1	-0.53569	1.49802	-0.53569	-0.426636
asun	-0.932757	1.38294	-0.466033	0.0158478
Asx	-1.14506	1.29011	-0.156014	0.0109648
Atac1	-1.07298	-0.595591	1.06004	0.60853
Atac2	-0.795951	-0.34684	1.46391	-0.321123
Atac3	-1.433	0.181689	0.881209	0.370101
ATbp	-0.5	-0.5	-0.5	1.5
Ate1	-1.1897	1.2564	-0.0771347	0.0104366
Atet	-0.560084	1.49422	-0.560084	-0.374053
Atf-2	-1.35603	0.338239	-0.00532116	1.02311
Atf3	-0.806658	1.44888	-0.469157	-0.173062
Atf6	-1.45034	0.464808	0.180657	0.804877
Atg1	1.4877	-0.66906	-0.364545	-0.454099
Atg10	-0.574959	1.49785	-0.460065	-0.462826
Atg101	-1.00986	1.04463	-0.683843	0.649073
Atg12	-1.41344	0.508147	0.0438619	0.861428
Atg13	-1.39826	0.44736	0.0323717	0.918527
Atg14	-1.36291	0.621865	-0.11999	0.861031
Atg16	-1.34403	-0.139079	0.93445	0.548663
Atg17	-1.34511	0.757099	-0.177486	0.765495
Atg18a	-1.3143	0.604957	-0.21763	0.926973
Atg18b	-1.25386	-0.256354	0.42212	1.08809
Atg2	-0.754246	1.43897	-0.593424	-0.0912965
Atg3	-1.38546	-0.0270309	0.503532	0.908963
Atg4a	-1.48123	0.692809	0.307118	0.481302
Atg4b	-1.37904	0.778108	0.695586	-0.0946551
Atg5	-1.34538	-0.0844675	0.998277	0.431572
Atg6	-1.48644	0.356939	0.677	0.452502
Atg7	-1.3952	0.932474	0.035344	0.427383
Atg8a	-1.3203	-0.187769	0.548589	0.95948
Atg9	-1.40946	0.778736	0.637919	-0.00719606
atilla	-0.854575	-0.855811	0.662089	1.0483
atl	-1.32791	1.02166	-0.117019	0.423268
atms	-1.03106	1.36876	-0.225456	-0.112244
Atox1	-1.48685	0.607197	0.310039	0.569615
ATP7	-0.910253	1.3059	-0.638157	0.242505
ATP8A	-1.35001	-0.135325	0.575239	0.910093
ATP8B	-0.818524	1.43555	-0.109961	-0.507067
Atpalpha	-1.35679	1.05397	0.116611	0.186213
ATPCL	1.48429	-0.299926	-0.539351	-0.64501
ATPsynC	-1.44173	0.258335	0.869602	0.313794
ATPsynE	1.26866	-0.748647	0.329417	-0.849426
ATPsynepsilonL	-0.5	-0.5	-0.5	1.5
ATPsynF	0.966935	-1.14609	0.695985	-0.516825
ATPsynGL	-0.540354	1.49745	-0.540354	-0.416743
AttA	-0.5	-0.5	-0.5	1.5
AttB	-0.622478	1.47397	-0.622478	-0.229015
AttD	-0.723331	1.47394	-0.269015	-0.481591
Atu	-1.26045	1.12414	0.331098	-0.194796
Atx-1	-0.5	1.5	-0.5	-0.5
Atx2	-1.49514	0.600102	0.403401	0.491636
Atxn7	-0.962223	1.38704	-0.385613	-0.0392076
aub	-0.593292	-0.593292	1.48549	-0.298902
aurA	-0.52457	1.49907	-0.52457	-0.449931
aurB	-1.03747	1.03702	0.651465	-0.651017
aux	-0.864175	1.43912	-0.379263	-0.195683
ave	-1.13734	-0.529989	0.96701	0.700323
Aven	-1.22067	-0.410299	0.8916	0.739369
awd	0.251068	-0.645019	1.30226	-0.908311
axed	-1.3096	-0.162965	0.441191	1.03138
Axn	-1.40475	0.734293	0.69768	-0.0272263
Axs	-1.37012	-0.0957666	0.872933	0.592953
Axud1	-1.2549	-0.174469	0.28269	1.14668
az2	-0.952542	1.29733	-0.590824	0.246041
b	0	0	0	0
B4	-1.45843	0.72455	0.168567	0.565318
B52	-1.49566	0.406009	0.49753	0.592125
B9d1	-0.5	-0.5	-0.5	1.5
bab1	-0.534147	1.49819	-0.534147	-0.429894
bab2	-0.5	-0.5	-0.5	1.5
babo	-1.37075	-0.0344549	0.960052	0.445152
babos	-0.792395	-0.792395	1.28658	0.298208
Bacc	-1.45907	0.571692	0.718069	0.169308
baf	-1.47561	0.312156	0.737134	0.426324
bai	-1.46633	0.457756	0.76092	0.247655
Baldspot	-1.37666	0.887164	0.559353	-0.0698601
ball	-1.21629	1.08184	-0.345826	0.480275
bam	-0.607919	1.4802	-0.607919	-0.26436
Bap170	-1.06079	0.425744	1.18119	-0.546137
Bap55	-1.4894	0.584132	0.57655	0.328721
Bap60	-1.38177	0.991016	0.0684054	0.322351
barc	-1.33225	-0.2023	0.709102	0.825447
barr	-1.36122	0.732936	-0.14001	0.768295
baz	-0.965816	1.40186	-0.276805	-0.159243
bb8	-0.5	-0.5	-0.5	1.5
bbc	-1.2433	0.795307	0.824555	-0.376561
bbg	-1.00205	-0.71453	0.935772	0.780811
bc10	-1.41106	0.288565	0.17677	0.945724
BCAS2	-1.46323	0.698555	0.184052	0.580619
bchs	-1.44876	0.837149	0.224472	0.387142
BCL7-like	-1.08544	1.26609	-0.408524	0.227875
bcn92	-1.05465	-0.645166	0.734154	0.965659
Bdbt	-1.4783	0.731997	0.360417	0.385886
bdg	-1.33067	1.06462	0.30696	-0.0409025
bdl	-0.704	1.4447	-0.103027	-0.637669
Bdp1	-1.3738	0.973277	0.406656	-0.0061334
be	-1.48052	0.501735	0.292788	0.685998
BEAF-32	-1.34707	0.213151	0.0684133	1.0655
beag	-1.22161	0.136859	1.21342	-0.128667
beat-Ib	-0.5	-0.5	-0.5	1.5
beat-Ic	-0.5	-0.5	-0.5	1.5
beat-IIIc	-0.5	-0.5	-0.5	1.5
beat-VI	-0.834132	1.16344	-0.834132	0.50482
beg	-0.834587	-0.834587	1.16159	0.507585
bel	1.44759	-0.145043	-0.518729	-0.783817
Bem46	-1.48917	0.642703	0.34892	0.497549
ben	1.13601	0.168271	-1.29658	-0.00769889
Best1	-1.33413	0.991744	0.46945	-0.12706
Bet1	-1.38497	-0.0792997	0.774106	0.690165
Bet3	-1.41403	0.0115666	0.609224	0.79324
Bet5	-1.23017	-0.333611	0.505593	1.05819
beta-Man	-1.34658	1.06801	0.199584	0.0789797
beta-PheRS	-1.39461	0.549676	0.867411	-0.0224715
beta-Spec	-0.870603	1.44154	-0.308329	-0.262603
beta'COP	-1.29881	1.02241	0.477004	-0.200598
beta3GalTII	-1.2684	-0.0905472	0.200092	1.15885
beta4GalNAcTA	-1.19233	1.06326	-0.404249	0.53332
beta4GalNAcTB	-1.33894	-0.104499	0.999714	0.443725
beta4GalT7	-1.3699	-0.0919751	0.57867	0.883206
betaCOP	-1.47604	0.544187	0.67921	0.252646
betaggt-I	-1.41186	0.694104	-0.0066852	0.724444
betaggt-II	1.47877	-0.264328	-0.661661	-0.552783
betaGlu	-1.22571	0.900605	0.725449	-0.400347
betaTub56D	-1.49707	0.526504	0.41261	0.557959
betaTub60D	1.07779	-1.22069	-0.339686	0.482584
betaTub85D	-0.851539	-0.851539	0.628463	1.07461
betaTub97EF	-1.35575	-0.145955	0.669992	0.831714
Bgb	-0.964457	1.28041	-0.594128	0.278173
bgm	-0.51718	1.49955	-0.51718	-0.465188
BHD	-0.854433	0.654712	-0.854433	1.05415
BI-1	-1.48816	0.446071	0.668372	0.373721
bib	-0.5	-0.5	-0.5	1.5
bic	1.44584	-0.273239	-0.31483	-0.857771
BicD	-1.23544	-0.156499	0.205846	1.18609
bif	1.44727	-0.853068	-0.320871	-0.273336
bigmax	1.49911	-0.51265	-0.533987	-0.452469
Bin1	-1.34448	-0.129042	0.949012	0.524506
bin3	-1.25873	-0.311828	0.991474	0.579085
bip1	-0.5	-0.5	-0.5	1.5
bip2	-1.39323	-0.0508631	0.804531	0.639565
Bka	-1.06833	-0.424988	1.27725	0.216064
blanks	-0.5	-0.5	-0.5	1.5
Blimp-1	-0.638553	1.4659	-0.638553	-0.188793
Blm	-0.831171	1.17513	-0.831171	0.48721
Blos1	-1.39748	-0.0477049	0.738377	0.706807
Blos2	-0.895241	-0.835785	0.89534	0.835687
Blos3	-1.24399	-0.375436	0.821509	0.797914
Blos4	-1.49526	0.52629	0.390266	0.578706
blot	-0.544063	1.49695	-0.544063	-0.408822
blow	-0.516294	1.4996	-0.516294	-0.467008
blp	-1.40976	0.239279	0.952884	0.217593
blw	1.44129	-0.541413	-0.114787	-0.785093
bma	-0.5	-0.5	-0.5	1.5
Bmcp	-1.37561	-0.0145627	0.429404	0.960773
bmm	-1.27427	1.10837	-0.175895	0.341792
bnl	-0.762554	-0.762554	1.34309	0.182017
boca	-1.30344	-0.246564	0.914605	0.635404
BOD1	-1.35389	1.01609	0.365711	-0.0279089
boi	-0.5	-0.5	-0.5	1.5
bol	-0.988705	-0.733493	0.834026	0.888173
bon	-1.39163	0.410731	0.945189	0.0357131
bonsai	-1.42591	0.584836	0.788668	0.052408
bor	-1.11174	1.15983	0.432938	-0.481033
bora	-0.5	-0.5	-0.5	1.5
BORCS5	-1.42648	0.161825	0.896246	0.368405
BORCS6	-1.34903	0.241739	0.0493575	1.05794
BORCS7	-1.14108	-0.448405	1.13652	0.452965
borr	-0.827667	1.43849	-0.133438	-0.477387
botv	-1.0971	1.32257	-0.00845734	-0.217015
bou	-0.5	-0.5	-0.5	1.5
bowl	-0.819858	1.45525	-0.381808	-0.253584
BoYb	-0.63046	1.47013	-0.63046	-0.209207
br	-1.14833	1.29248	-0.0870213	-0.0571219
Br140	-0.991295	0.247754	1.28816	-0.544615
brat	-0.709007	1.48035	-0.320894	-0.450448
Brca2	-1.32977	0.787447	-0.210794	0.753122
Brd8	-1.21611	-0.0249947	1.23304	0.00806791
Bre1	1.44564	-0.809758	-0.479578	-0.156301
Brf	-0.917749	1.42454	-0.254477	-0.252315
brk	-1.10059	-0.434232	0.307907	1.22692
brm	-1.16536	1.27369	-0.137183	0.0288592
Brms1	-1.49813	0.566437	0.484742	0.446955
brn	-1.04756	0.0949233	-0.372162	1.3248
brp	-0.842859	0.561477	-0.842859	1.12424
Bruce	-1.0391	1.36613	-0.179193	-0.147832
BRWD3	-0.926066	1.4127	-0.362203	-0.124434
brwl	-1.17788	0.414429	-0.376377	1.13982
bs	-1.29493	1.05651	-0.179561	0.417981
bsf	-0.826388	1.44472	-0.448254	-0.17008
Bsg	1.16964	0.393501	-1.13893	-0.424209
Bsg25D	-1.37048	0.617106	-0.101422	0.854796
bsk	-1.45759	0.151981	0.655285	0.650327
bt	-0.837784	1.148	-0.837784	0.527565
BTBD9	-1.32489	0.759519	-0.221286	0.786658
BtbVII	-1.45422	0.816269	0.231108	0.406848
BthD	-0.5	-0.5	-0.5	1.5
Btk29A	-0.529527	1.49865	-0.529527	-0.439598
btl	-1.49646	0.513883	0.574408	0.408165
btsz	-0.5	-0.5	-0.5	1.5
btz	-1.26285	1.14043	-0.159178	0.281596
Bub1	-1.0068	1.33909	-0.428807	0.0965092
Bub3	-1.43374	0.536989	0.092029	0.804719
BubR1	-0.5	-0.5	-0.5	1.5
bug	-1.47016	0.408404	0.763446	0.298309
Bug22	-0.976274	-0.735229	0.711345	1.00016
BuGZ	1.4949	-0.384886	-0.578197	-0.531816
bun	-1.41597	0.908677	0.396231	0.111063
bur	-1.40712	-0.0183679	0.669956	0.755534
bves	-1.22829	-0.181131	0.222394	1.18703
bw	-0.52734	1.49885	-0.52734	-0.444167
bwa	-0.551722	1.49576	-0.551722	-0.392315
Bx	-0.5	-0.5	-0.5	1.5
Bx42	1.49865	-0.53991	-0.44091	-0.517828
by	-0.895589	1.29093	-0.673729	0.278384
bys	-0.994006	1.38757	-0.129108	-0.264455
c(2)M	-0.5	1.5	-0.5	-0.5
c(3)G	-0.932259	1.33781	-0.562578	0.157023
c11.1	-1.44729	0.805769	0.162138	0.47938
c12.1	-1.46662	0.298882	0.781192	0.38655
c12.2	-1.26236	-0.3315	0.682146	0.911717
C1GalTA	-0.649541	1.48298	-0.291127	-0.542314
C3G	1.37942	0.0854951	-0.640518	-0.824396
ca	-1.45222	0.709409	0.134874	0.607941
Ca-alpha1D	-0.5	-0.5	-0.5	1.5
Ca-alpha1T	-0.5	-0.5	-0.5	1.5
Ca-Ma2d	-0.865585	0.904625	-0.865585	0.826546
CaBP1	-1.40739	0.744698	0.681407	-0.0187105
cac	-0.712682	1.4085	-0.712682	0.0168606
cact	-1.20646	1.2415	-0.0529619	0.0179239
cactin	-1.492	0.502692	0.620864	0.368447
Cad86C	-0.886228	1.12684	0.556409	-0.79702
Cad87A	-0.543768	1.49699	-0.543768	-0.409455
Cad96Ca	-0.5	-0.5	-0.5	1.5
Cad99C	-0.858447	-0.858447	0.69678	1.02011
CadN	-0.5	-0.5	-0.5	1.5
Caf1-105	-1.0877	0.858836	-0.611214	0.840077
Caf1-180	-1.3219	-0.133859	0.432051	1.02371
Caf1-55	-0.853367	0.644728	-0.853367	1.06201
cag	-1.23887	-0.384341	0.805683	0.81753
CAH1	-0.5	-0.5	-0.5	1.5
CAH13	-0.5	-0.5	-0.5	1.5
CAH2	-0.534125	1.49819	-0.534125	-0.429939
CAH3	-1.22119	1.13075	-0.290937	0.381384
CAH7	-0.831412	0.298649	-0.752845	1.28561
CAHbeta	-0.689065	1.43094	-0.689065	-0.0528112
cal1	1.49403	-0.596164	-0.380379	-0.517483
CalpA	1.4449	-0.175204	-0.829169	-0.440522
CalpB	-1.15162	1.27856	-0.187936	0.0609974
CalpC	-1.47975	0.626673	0.590494	0.26258
Cals	-1.40811	0.389986	0.0926195	0.925505
Calx	-0.662324	1.45141	-0.662324	-0.126761
calypso	-1.14931	-0.304944	0.212998	1.24126
Cam	1.40459	-0.96212	-0.263435	-0.179034
CaMKI	-1.41589	0.182469	0.299456	0.933964
CaMKII	-1.46696	0.200873	0.688678	0.577409
Camp	-1.14008	0.798225	-0.537813	0.879666
Camta	-1.30187	-0.267205	0.821433	0.747645
cana	-0.5	-0.5	-0.5	1.5
CanA-14F	-1.30513	1.10941	-0.054928	0.250648
CanB2	1.45781	-0.429984	-0.798246	-0.229579
Cand1	-1.41539	0.00648678	0.659016	0.749886
CAP	-1.36233	-0.116181	0.602226	0.876287
Cap-D2	-0.5	-0.5	-0.5	1.5
Cap-D3	-0.994609	0.905588	-0.725782	0.814803
Cap-G	-1.37079	0.511802	0.924502	-0.0655158
Cap-H2	-0.84089	1.37517	0.0927905	-0.627066
Caper	-1.39178	0.960548	0.0617887	0.36944
Capr	1.49491	-0.44411	-0.436193	-0.614608
caps	-1.42843	0.628627	0.0502043	0.749598
capt	-1.49681	0.547152	0.406816	0.542843
capu	-1.49643	0.429011	0.592631	0.474791
car	-1.42911	0.41836	0.87403	0.136719
CARPB	-0.924386	0.84157	0.88812	-0.805304
CarT	-0.5	-0.5	-0.5	1.5
CASK	-1.42731	0.824707	0.076509	0.526098
casp	-1.41012	0.731214	-0.0115686	0.690474
Cat	-1.27625	1.11661	-0.156438	0.316072
cathD	-1.18379	1.17612	0.33199	-0.324322
Catsup	-1.2117	1.11693	0.421396	-0.32663
cav	-0.858958	-0.858958	1.01511	0.702807
caz	-1.04492	1.31999	-0.39045	0.115384
cbc	-1.34565	0.434797	0.99642	-0.0855648
Cbl	-1.49738	0.578752	0.437341	0.481286
CBP	-0.5	-0.5	-0.5	1.5
Cbp20	-1.10924	-0.559235	0.654042	1.01443
Cbp80	-1.47188	0.762892	0.365091	0.3439
cbs	-1.42917	0.159433	0.885794	0.383946
Cbs	-1.05644	0.482499	1.14907	-0.575125
cbt	-1.23523	1.18507	-0.160058	0.210222
Cby	-0.971987	-0.0646036	-0.351707	1.3883
Cc2d2a	-0.5	-0.5	-0.5	1.5
CCAP	-1.1889	-0.33297	1.15943	0.362449
CCDC53	-0.979852	0.858248	-0.744153	0.865758
Ccdc56	-1.26371	-0.287972	1.01695	0.534733
Ccdc58	-1.36841	-0.114352	0.654471	0.828286
Ccdc85	-0.5	-0.5	-0.5	1.5
CCHa2	-0.611436	-0.611436	1.47878	-0.255912
Cchl	-1.27807	-0.096157	1.14155	0.232677
Ccm3	-1.43028	0.143682	0.413107	0.873493
Ccs	-1.46933	0.5586	0.21627	0.694458
CCT2	-0.233679	-1.31637	0.850039	0.700006
CCT4	-0.0424687	-1.23989	1.20627	0.0760949
CCT8	-1.49816	0.496736	0.561261	0.440166
Ccz1	-1.44391	0.283404	0.29615	0.864353
CD98hc	1.48021	-0.592529	-0.26511	-0.622573
Cda5	-0.949008	-0.736825	0.582672	1.10316
CDase	-0.580312	1.48942	-0.580312	-0.328795
cdc14	-1.12082	1.29431	-0.250253	0.0767565
Cdc16	-1.17516	0.915918	0.740558	-0.481315
Cdc23	-1.12812	1.09302	-0.498216	0.533313
Cdc27	-1.25366	0.813943	-0.35857	0.798287
Cdc37	-1.47273	0.228197	0.67003	0.574502
Cdc42	1.05793	0.64895	-0.815229	-0.891653
CDC45L	-1.08884	1.31054	0.0793373	-0.30104
Cdc5	-1.15462	1.28454	-0.129696	-0.000219873
CDC50	-1.42778	0.906572	0.217283	0.303922
Cdc6	-0.914934	-0.432951	-0.0564857	1.40437
Cdep	-1.47483	0.569447	0.665696	0.239688
CdGAPr	-1.33466	0.498834	-0.139105	0.974932
cdi	-1.28937	0.610824	-0.266614	0.945162
Cdk1	-0.853654	1.35866	0.133375	-0.638381
Cdk12	-1.47321	0.2253	0.635015	0.612896
Cdk2	-0.708545	1.41277	-0.708545	0.00432464
CDK2AP1	-1.44251	0.513521	0.129853	0.799132
Cdk4	-1.47055	0.499604	0.24412	0.726828
Cdk5	1.48224	-0.698219	-0.455688	-0.328334
Cdk5alpha	-0.806758	-0.806758	1.25205	0.361468
Cdk7	-1.09332	-0.146347	-0.0925058	1.33217
Cdk8	-1.47952	0.632639	0.261933	0.584952
Cdk9	-1.3084	0.56433	-0.216525	0.960594
Cdlc2	-0.5	-0.5	-0.5	1.5
cdm	-0.771393	1.4678	-0.284873	-0.411535
Cec2	-0.957099	1.39024	-0.385985	-0.0471506
CecA1	-0.755285	-0.681109	1.40158	0.0348148
CecA2	-0.645468	-0.645468	1.46201	-0.171074
CecB	-1.11072	0.195703	1.26664	-0.351621
CecC	-1.04053	0.788999	0.92048	-0.668947
Ced-12	-1.32627	0.990143	-0.15141	0.487539
ced-6	-1.46183	0.783438	0.437125	0.241264
Cen	-0.588589	1.48699	-0.588589	-0.309813
CenB1A	-1.48828	0.669736	0.436521	0.382019
CenG1A	-1.04137	-0.601879	1.14034	0.502902
Cenp-C	-0.672328	1.47755	-0.54515	-0.26007
Cep135	-0.6636	1.48916	-0.437996	-0.387562
cep290	-0.5	-0.5	-0.5	1.5
Cep89	-0.5	-0.5	-0.5	1.5
Cep97	-1.41906	0.503469	0.853789	0.0618056
cer	-0.777777	-0.256865	-0.429737	1.46438
Cerk	-1.4596	0.737284	0.180715	0.541599
cert	-1.41588	0.598188	0.019511	0.798177
cerv	-0.806801	-0.806801	0.361666	1.25194
Cf2	-1.11452	-0.179679	-0.019271	1.31347
Cfp1	-1.34993	0.178947	1.06511	0.105874
cg	-1.49169	0.610003	0.357023	0.524668
CG10005	0	0	0	0
CG10011	-1.17975	1.20087	-0.298549	0.277429
CG10026	-0.679112	1.43912	-0.679112	-0.0808963
CG10031	-0.519407	1.49942	-0.519407	-0.46061
CG10038	-1.39718	0.110582	0.320803	0.965792
CG10041	-0.556857	-0.556857	1.49484	-0.38113
CG10050	-1.19551	1.00309	0.618731	-0.426306
CG10053	-0.778067	-0.778067	0.240271	1.31586
CG10055	-1.43162	0.236923	0.897916	0.296781
CG10063	1.49933	-0.457601	-0.524649	-0.517075
CG10068	-1.37325	0.729718	0.754558	-0.111021
CG10075	-1.36069	0.973423	-0.0573643	0.444627
CG10077	-1.30899	1.07302	-0.113663	0.349634
CG10082	-1.39292	0.537488	0.877721	-0.0222936
CG10086	-0.5	-0.5	-0.5	1.5
CG10096	-0.5	-0.5	-0.5	1.5
CG10098	-1.338	0.9776	-0.127301	0.4877
CG10103	-1.44746	0.480056	0.162404	0.805001
CG10126	-1.39117	0.126004	0.280121	0.985042
CG10132	-0.5	-0.5	-0.5	1.5
CG10137	-0.802858	1.26203	-0.802858	0.343687
CG10139	-1.30244	-0.217638	0.535338	0.984737
CG10147	-1.09519	1.07658	-0.556982	0.57559
CG10165	-1.35371	0.122206	1.05973	0.171778
CG10166	-1.43077	0.217697	0.897851	0.315223
CG10171	-0.950462	1.357	-0.496978	0.090438
CG10184	-0.643251	-0.643251	1.46329	-0.176782
CG10188	-1.46012	0.794761	0.245958	0.419405
CG10189	-1.03094	-0.0124869	-0.312737	1.35617
CG10194	-1.16763	1.18325	0.336021	-0.351645
CG10195	-1.42695	0.868841	0.442149	0.115955
CG10208	-0.591342	1.48612	-0.591342	-0.303436
CG10209	-1.4921	0.615595	0.510891	0.365613
CG10214	-1.36628	-0.0374796	0.431155	0.972609
CG10222	-0.856274	-0.856274	0.673	1.03955
CG10232	-1.46696	0.466917	0.245099	0.754945
CG1024	-0.836224	1.44874	-0.221706	-0.390809
CG10252	-0.758794	1.3491	-0.758794	0.168487
CG10254	-1.26061	1.18215	0.111061	-0.0325978
CG10265	-1.2608	1.16096	0.219584	-0.119735
CG10268	-1.07845	0.885663	-0.622621	0.815408
CG10274	-1.41321	0.00343103	0.637534	0.772248
CG10283	-1.04033	-0.130651	-0.193942	1.36493
CG10286	-1.34756	1.07025	0.148629	0.128681
CG10311	-1.23118	1.19259	0.194219	-0.155629
CG10321	-0.955605	1.39388	-0.0644177	-0.373857
CG10324	1.49763	-0.563112	-0.508079	-0.426443
CG10333	-1.4925	0.397214	0.461492	0.633792
CG10336	-0.514306	1.49969	-0.514306	-0.471076
CG10337	-0.80631	1.44496	-0.489643	-0.149007
CG10338	-1.38017	0.956192	-0.00125088	0.42523
CG10340	-1.37673	0.203163	1.01963	0.153939
CG10341	-0.851598	1.41443	-0.522022	-0.0408088
CG10343	-1.30284	-0.266544	0.777934	0.791447
CG10344	-1.36112	0.804576	-0.137151	0.693692
CG10347	-1.30587	0.183569	1.12294	-0.000635488
CG10353	-0.897619	1.22232	-0.731339	0.406636
CG10359	-1.27741	-0.226935	0.447861	1.05648
CG10365	-0.815274	1.38707	0.0661607	-0.637957
CG10366	-1.10323	1.28111	0.161882	-0.339755
CG10375	-1.49571	0.398638	0.515832	0.581244
CG10376	-1.46158	0.172818	0.602798	0.685965
CG10383	-1.26594	0.885224	0.710601	-0.329888
CG10395	-1.10322	-0.457213	0.358097	1.20234
CG10405	-0.5	-0.5	-0.5	1.5
CG10407	-1.12135	0.257408	1.23916	-0.375226
CG10413	-1.15257	1.2885	-0.0353455	-0.100582
CG10417	-1.47095	0.316416	0.763978	0.390554
CG10418	-1.25593	-0.0523138	1.18523	0.123022
CG10425	1.47669	-0.250289	-0.564584	-0.661814
CG10428	-1.38711	0.0167898	0.423674	0.946647
CG10431	0.944331	0.782172	-0.808307	-0.918197
CG10433	-0.720702	-0.332615	-0.426027	1.47934
CG10435	-1.39651	0.213834	0.981651	0.201019
CG10444	-1.46022	0.577718	0.172357	0.710142
CG10445	-0.5	-0.5	-0.5	1.5
CG10462	-1.36863	-0.122111	0.765452	0.725284
CG10463	-1.27699	0.976275	-0.280316	0.581033
CG10465	-1.44901	0.285167	0.315653	0.848187
CG10466	-0.854532	-0.854532	0.655656	1.05341
CG10467	-0.904989	1.42845	-0.303609	-0.219856
CG10469	-0.58416	1.49728	-0.457858	-0.455265
CG10470	-1.46767	0.507448	0.732513	0.227713
CG10472	-0.5	-0.5	-0.5	1.5
CG10492	-0.741028	1.45183	-0.568042	-0.142765
CG10494	-1.11993	0.676606	0.992924	-0.549595
CG10495	-0.724188	-0.394317	1.47973	-0.36122
CG10505	-0.509124	1.49987	-0.509124	-0.481625
CG10508	-0.577096	1.49611	-0.403221	-0.515789
CG10512	-1.46407	0.235777	0.766719	0.461573
CG10516	-0.923421	0.54397	-0.753513	1.13296
CG10527	-1.4889	0.32699	0.605987	0.555919
CG10543	-1.41775	0.803084	0.0279213	0.586742
CG10550	-0.575502	1.4907	-0.575502	-0.3397
CG10555	-1.47345	0.42161	0.304558	0.747283
CG10561	-0.823818	1.20151	-0.823818	0.446129
CG10565	-0.963195	1.40511	-0.232614	-0.209302
CG10576	-1.37001	0.822444	0.658966	-0.111396
CG10581	-0.64919	-0.64919	1.45981	-0.16143
CG10584	-1.09631	-0.173842	1.32835	-0.0581955
CG10589	-0.5	-0.5	-0.5	1.5
CG10600	-1.47728	0.395654	0.345687	0.735938
CG10616	-1.46924	0.342376	0.352227	0.774634
CG10621	-0.726054	-0.280807	-0.467937	1.4748
CG10623	-1.40422	0.926392	0.0718847	0.405945
CG10628	-0.805588	1.44985	-0.466064	-0.178195
CG10631	-0.946167	1.17328	0.479058	-0.706173
CG10638	-1.41832	0.764123	0.635712	0.0184895
CG10646	-1.05481	-0.378961	0.11858	1.31519
CG10654	-0.713143	1.4768	-0.479014	-0.284647
CG10660	1.49665	-0.40511	-0.536145	-0.555398
CG10663	-0.861118	0.730918	-0.861118	0.991318
CG10669	-0.863748	-0.863748	0.774976	0.952519
CG10672	-1.373	0.216242	1.02506	0.131698
CG10674	-1.47575	0.692921	0.52487	0.257957
CG10681	-1.15782	-0.340002	0.2895	1.20832
CG10702	-0.530732	1.49854	-0.530732	-0.437073
CG10731	-1.23388	-0.0292241	1.2142	0.0489001
CG10734	-0.5	-0.5	-0.5	1.5
CG10737	1.49774	-0.468005	-0.45338	-0.576357
CG1074	-1.30123	-0.212821	0.51689	0.997161
CG10747	-1.01501	-0.481622	0.192508	1.30412
CG10764	-1.37767	0.949618	0.447093	-0.0190429
CG1077	-0.601961	-0.601961	1.48246	-0.278543
CG10778	-1.40666	0.940594	0.351312	0.114756
CG10795	-1.26274	0.998113	-0.300272	0.564894
CG10799	-0.843248	-0.843248	1.12229	0.564204
CG10801	-0.5	-0.5	-0.5	1.5
CG10802	-1.38252	0.601079	-0.068646	0.850083
CG10803	1.49869	-0.473605	-0.558559	-0.466523
CG10809	-1.118	-0.566615	0.771447	0.913173
CG10841	-0.5	-0.5	-0.5	1.5
CG10859	-0.503697	1.49998	-0.503697	-0.492586
CG10863	1.11634	-1.31301	0.170596	0.0260679
CG10866	-0.5	-0.5	-0.5	1.5
CG10874	-1.45452	0.354715	0.27263	0.827176
CG10877	-0.5	1.5	-0.5	-0.5
CG10889	-1.04388	-0.291104	-0.0160664	1.35105
CG10898	-1.48795	0.470193	0.355566	0.66219
CG1090	-0.571674	1.49166	-0.571674	-0.348313
CG10903	-1.23134	-0.296445	1.10216	0.425633
CG10904	-1.25117	0.254875	-0.162655	1.15895
CG10907	-0.969028	-0.744147	0.997555	0.71562
CG10914	-0.999053	1.36753	-0.362947	-0.00552763
CG10916	-1.13011	1.21994	-0.384448	0.294617
CG1092	1.40258	0.0337039	-0.708761	-0.727523
CG10927	-0.862765	0.968946	-0.862765	0.756583
CG10932	-0.834754	1.44102	-0.449513	-0.156758
CG10947	-1.23416	-0.321329	0.491531	1.06396
CG10948	-1.09777	0.353345	-0.462349	1.20677
CG10949	-1.41495	0.0137371	0.790171	0.611038
CG10958	-0.5	-0.5	-0.5	1.5
CG10959	-0.5	-0.5	-0.5	1.5
CG10960	-1.19039	-0.43579	1.00127	0.624913
CG10962	-0.522938	1.49919	-0.522938	-0.453316
CG10970	-0.503352	1.49998	-0.503352	-0.493279
CG10973	-1.257	-0.226894	1.10767	0.376218
CG10979	-0.988282	-0.0950725	-0.30314	1.38649
CG10984	-1.11364	1.25074	-0.37355	0.236453
CG11000	-0.938252	-0.0246678	1.39126	-0.428339
CG11007	-1.46828	0.233826	0.73455	0.499907
CG1103	1.487	-0.321918	-0.639547	-0.525533
CG11030	-1.40367	0.896221	0.474799	0.0326498
CG11034	-0.781422	-0.781422	1.3094	0.253447
CG11035	-1.30499	0.339019	-0.115144	1.08112
CG1105	-1.34991	0.714831	-0.164687	0.799769
CG11050	-1.09144	-0.253274	0.0240936	1.32062
CG11052	-0.5	-0.5	-0.5	1.5
CG11070	-1.42346	0.836262	0.519465	0.0677318
CG11076	-1.17585	-0.479639	0.919895	0.735599
CG11077	1.48828	-0.619035	-0.325064	-0.544186
CG11089	-1.40739	0.9518	0.296871	0.15872
CG11095	-1.4024	0.588609	-0.0148082	0.828603
CG11103	-1.3896	0.667093	-0.0647602	0.787271
CG11106	-0.5	-0.5	-0.5	1.5
CG11109	-1.1436	0.0271203	-0.172569	1.28905
CG11110	-1.10806	-0.570547	0.701796	0.976811
CG11122	-1.38795	0.717203	-0.0734559	0.744199
CG11123	-1.01457	1.37813	-0.233315	-0.130246
CG11125	-0.5	-0.5	-0.5	1.5
CG11127	-1.42343	0.0878436	0.860476	0.475106
CG11134	-1.30809	-0.165186	1.03358	0.439692
CG11137	-1.379	0.482415	0.929807	-0.0332255
CG11141	-1.44835	0.77288	0.533698	0.141773
CG11151	-1.48264	0.698007	0.450392	0.33424
CG11155	-1.04606	-0.160205	-0.156003	1.36226
CG11158	-0.854694	1.44694	-0.28076	-0.311491
CG1116	-1.01033	-0.208664	-0.16275	1.38174
CG11164	-0.645591	-0.645591	1.46194	-0.170757
CG11168	-1.39371	0.716805	0.735097	-0.0581883
CG11170	-1.45966	0.509363	0.756596	0.193695
CG11178	-1.32264	-0.0812414	0.342362	1.06152
CG11180	-1.04037	-0.450223	1.29484	0.195746
CG11200	-0.995504	1.3812	-0.308761	-0.0769363
CG11236	0	0	0	0
CG11241	-0.531841	1.49843	-0.531841	-0.434746
CG11247	-1.39816	0.0504388	0.414602	0.933119
CG11248	-0.878642	-0.10809	-0.436549	1.42328
CG11249	-0.503801	1.49998	-0.503801	-0.492376
CG11257	-1.03667	-0.338728	1.34524	0.0301548
CG11267	-1.3366	0.71065	0.819224	-0.193276
CG11279	-1.48337	0.462889	0.690065	0.330411
CG1129	-1.48607	0.401551	0.396879	0.687638
CG11307	-1.40058	0.0597716	0.409704	0.931102
CG11309	-1.12073	1.18515	-0.442881	0.378469
CG11313	-0.5	-0.5	-0.5	1.5
CG11318	0	0	0	0
CG11334	-1.1725	1.26961	-0.114184	0.0170722
CG11342	-0.820721	-0.820721	1.21166	0.429783
CG11350	-0.5	-0.5	-0.5	1.5
CG11353	-0.781295	-0.430633	1.46321	-0.251284
CG11357	-1.49004	0.485338	0.642909	0.361793
CG1136	-0.5	-0.5	-0.5	1.5
CG11360	-1.3031	1.1331	0.0428655	0.127138
CG11362	-0.550371	1.49598	-0.550371	-0.395243
CG11367	-0.77837	0.241452	-0.77837	1.31529
CG11374	-1.31839	-0.128702	0.408709	1.03838
CG11377	-1.40372	0.174093	0.963573	0.266055
CG11378	-0.508929	1.49988	-0.508929	-0.482021
CG11396	-0.867329	-0.701141	0.271356	1.29711
CG11398	-1.00478	-0.451527	1.3307	0.125609
CG11399	-0.5	-0.5	-0.5	1.5
CG11400	-0.914984	-0.7347	0.462703	1.18698
CG11403	-0.759572	1.34788	-0.759572	0.171267
CG11406	0	0	0	0
CG11413	-0.5	-0.5	-0.5	1.5
CG11414	-1.44771	0.851976	0.318072	0.277664
CG11417	-1.06392	-0.00495808	1.33967	-0.270792
CG1142	-1.26735	-0.29565	0.987559	0.575443
CG11426	-1.12395	-0.559235	0.902593	0.78059
CG1143	-0.858009	-0.858009	0.69175	1.02427
CG11436	-1.26276	1.17796	0.126818	-0.0420181
CG11444	-1.4811	0.278863	0.655418	0.546818
CG11447	-0.863289	-0.644046	1.34692	0.160412
CG11454	-1.36463	-0.105594	0.583662	0.886558
CG11456	-0.583461	-0.583461	-0.321607	1.48853
CG1146	-0.595963	1.48871	-0.323754	-0.568993
CG11474	-1.00781	-0.585574	0.365419	1.22796
CG11475	-0.5	-0.5	-0.5	1.5
CG11486	-1.48585	0.312917	0.529671	0.643261
CG11504	-1.03189	-0.662062	0.670694	1.02326
CG11523	-1.49753	0.418359	0.545365	0.533807
CG11537	1.45162	-0.836339	-0.352726	-0.262552
CG11539	-1.01423	-0.638179	1.14151	0.510906
CG11555	-0.929262	-0.746596	1.13358	0.542279
CG11560	-1.40188	0.552992	-0.00486663	0.853758
CG11562	-1.47547	0.322486	0.741253	0.411735
CG11563	-1.31572	1.04615	0.39757	-0.127998
CG11583	-1.39883	0.0322727	0.450362	0.916194
CG11586	-1.29495	0.987715	-0.233901	0.541132
CG11590	-1.17225	0.495952	-0.420517	1.09682
CG11593	-1.46662	0.2437	0.756119	0.466805
CG11594	-0.531334	1.49848	-0.531334	-0.435811
CG11596	-1.49726	0.538246	0.41368	0.54533
CG11597	-0.5	-0.5	-0.5	1.5
CG11601	-1.01513	-0.594966	0.405472	1.20462
CG1161	-1.49379	0.383694	0.606124	0.503971
CG11619	-0.5	-0.5	-0.5	1.5
CG11638	-0.75656	-0.75656	1.35257	0.160546
CG11655	-1.25816	1.1892	0.0190291	0.0499319
CG11658	-0.864334	0.940844	-0.864334	0.787824
CG11679	-1.41141	0.630979	-0.000463985	0.780893
CG11686	-0.513206	-1.04075	0.304722	1.24924
CG11695	-0.607971	-0.607971	-0.264235	1.48018
CG11696	-1.49672	0.407793	0.562486	0.526442
CG11699	-1.35672	0.778682	-0.150249	0.728285
CG11700	-1.13808	-0.53225	0.950238	0.720092
CG11710	-1.39596	0.982402	0.188337	0.225217
CG1172	-1.31635	-0.134104	0.411128	1.03933
CG11722	1.49921	-0.52984	-0.454647	-0.514722
CG11723	-1.31148	0.0312679	0.160755	1.11946
CG11737	-1.27137	-0.259009	0.495458	1.03492
CG11752	-1.45998	0.173615	0.569223	0.717144
CG11753	-1.14754	0.752709	-0.523226	0.918054
CG11755	-1.08809	0.846287	-0.610743	0.852551
CG11771	-1.37554	1.02019	0.222219	0.133133
CG11777	-1.35277	0.0194971	0.291934	1.04134
CG11779	-1.3538	-0.157638	0.746466	0.764968
CG11781	-1.49982	0.520834	0.483492	0.495492
CG11786	-0.729309	-0.729309	1.38978	0.0688418
CG11788	-1.23236	1.08553	0.455595	-0.308766
CG11790	-1.04229	1.33223	0.0749895	-0.364931
CG11791	-1.49101	0.372138	0.480499	0.638374
CG11807	-1.31004	0.742864	-0.250788	0.817961
CG11808	-1.10677	-0.555344	0.6245	1.03762
CG11811	-1.42388	0.0610665	0.823219	0.539591
CG11825	-0.5	-0.5	-0.5	1.5
CG11836	-0.5	-0.5	-0.5	1.5
CG11837	-1.49619	0.596501	0.470903	0.428785
CG11839	-0.895385	-0.822675	0.70799	1.01007
CG11857	-1.48279	0.387689	0.707854	0.387251
CG11858	-1.47368	0.494894	0.717779	0.261012
CG11873	-1.41775	0.934347	0.249829	0.233576
CG11882	-1.27327	1.06216	-0.232309	0.44342
CG11883	-0.807638	1.39872	0.0335481	-0.624633
CG11885	-1.4659	0.229336	0.748624	0.487944
CG11893	-0.721465	-0.721465	1.39894	0.043988
CG11899	-0.666347	-0.115934	-0.666347	1.44863
CG11902	-1.29441	1.0771	0.373928	-0.156614
CG11906	-1.00844	1.01982	-0.692329	0.680945
CG11911	0	0	0	0
CG11920	-1.22799	1.19086	-0.172754	0.209884
CG11927	-1.27038	-0.126905	0.254895	1.14239
CG11961	-0.632918	1.48903	-0.516812	-0.339296
CG11964	-1.4815	0.690214	0.484245	0.30704
CG11970	-1.34608	-0.0121776	0.314791	1.04347
CG11975	-1.33091	-0.143661	0.491458	0.983113
CG11980	-1.46646	0.195197	0.594728	0.676533
CG11983	0	0	0	0
CG11986	-0.5	-0.5	-0.5	1.5
CG11999	-1.32632	0.645023	0.885047	-0.20375
CG12004	-1.44839	0.850465	0.29178	0.30615
CG12007	-1.44324	0.42511	0.178862	0.839262
CG12010	-1.38513	0.971869	0.0461643	0.367095
CG12012	-1.28959	-0.188667	0.416078	1.06218
CG12024	-0.730627	-0.471329	-0.271284	1.47324
CG12025	-1.31921	-0.0623691	0.302582	1.079
CG12054	-1.41667	0.936846	0.229101	0.250727
CG12056	-0.607754	1.48026	-0.607754	-0.264755
CG12065	-1.21061	1.23691	-0.0585736	0.0322681
CG12071	-0.875654	1.31692	0.227468	-0.668735
CG12075	-0.865723	0.833376	-0.865723	0.89807
CG1208	-1.28805	-0.247695	0.54391	0.991835
CG12081	-1.39839	0.79569	-0.0375959	0.640293
CG12084	-1.47054	0.552673	0.694346	0.223517
CG12091	-1.44529	0.476205	0.156824	0.812262
CG12093	-1.48255	0.68986	0.473724	0.318962
CG12096	-1.46972	0.207705	0.616024	0.645989
CG12099	-1.07107	1.22548	-0.488965	0.334559
CG12104	-1.35979	-0.103478	0.918308	0.544958
CG12105	-0.834942	1.16012	-0.834942	0.509762
CG12106	-0.9517	-0.458276	0.0378171	1.37216
CG12107	-1.4503	0.24658	0.837804	0.36592
CG12112	0.944478	-1.4121	0.185808	0.281811
CG12116	-0.736368	1.38098	-0.736368	0.0917561
CG12118	-1.01575	-0.571351	0.356308	1.23079
CG12121	-1.49572	0.585978	0.507906	0.401839
CG12123	-1.30757	-0.070924	1.09858	0.279916
CG12128	-1.01137	1.38088	-0.152983	-0.21653
CG12129	-1.32162	-0.20388	0.917937	0.607566
CG1213	-0.780843	-0.22518	-0.454468	1.46049
CG12133	-0.990122	-0.322633	1.38229	-0.0695369
CG12134	-1.37598	0.756855	0.723199	-0.104073
CG12155	-1.10026	0.25834	-0.406172	1.24809
CG12159	-1.28881	-0.215348	1.03612	0.468035
CG12163	1.49012	-0.628981	-0.349556	-0.511588
CG12170	-1.17484	-0.0321532	-0.063704	1.27069
CG12171	-1.1527	0.938057	0.727121	-0.512482
CG12173	-1.31715	-0.00543669	1.10315	0.21944
CG12177	-1.00071	1.3851	-0.247929	-0.136457
CG12179	-0.959009	-0.311428	1.40213	-0.131694
CG1218	-1.41967	0.546825	0.0461864	0.826663
CG12182	-0.807655	1.24968	-0.807655	0.365631
CG12184	-0.559947	1.49425	-0.559947	-0.374355
CG12204	-1.40082	0.971977	0.192007	0.236839
CG12209	-0.86548	-0.86548	0.908932	0.822028
CG12213	-1.4458	0.770187	0.54785	0.127767
CG12219	-1.3429	0.507323	-0.125411	0.960992
CG12224	-0.866007	-0.866007	0.857975	0.874038
CG12236	-1.43487	0.828582	0.114978	0.491309
CG12237	-1.19466	1.06466	0.529139	-0.39914
CG12241	-1.08904	1.28838	-0.358696	0.159357
CG12253	-0.5	-0.5	-0.5	1.5
CG12259	-1.13869	-0.535182	0.926486	0.747387
CG12267	-1.03526	-0.301995	1.35525	-0.0179906
CG1227	-1.28257	-0.241504	0.501962	1.02211
CG12279	-1.25471	-0.0650353	1.18457	0.135175
CG12288	-0.863543	1.32532	0.211387	-0.673161
CG12290	-0.57525	1.49421	-0.375322	-0.543641
CG12299	-1.12348	0.887949	0.796588	-0.561057
CG12301	-1.22032	-0.161377	1.20574	0.175962
CG12316	-1.18772	0.359707	-0.333368	1.16138
CG12320	-0.791805	-0.791805	1.28788	0.295731
CG12321	-1.4562	0.715082	0.586796	0.154319
CG12325	-0.819636	-0.819636	0.424168	1.2151
CG1233	-0.603351	1.49466	-0.494403	-0.396904
CG12333	-1.48184	0.518085	0.293023	0.670731
CG12338	-1.09017	0.575364	-0.563563	1.07837
CG1234	-1.17215	1.26389	-0.156386	0.0646443
CG12341	-1.19939	-0.354528	0.439007	1.11492
CG12343	-1.21555	-0.419374	0.8885	0.746419
CG12344	-0.5	1.5	-0.5	-0.5
CG1236	-1.43551	0.447351	0.8483	0.139864
CG12375	-1.40608	0.165502	0.284094	0.956479
CG12379	-0.865305	-0.865305	0.815374	0.915237
CG12384	-1.44271	0.102626	0.598873	0.741214
CG1239	-0.557397	-0.557397	-0.379948	1.49474
CG12391	-1.19528	-0.173254	0.134338	1.2342
CG12446	-0.5	-0.5	-0.5	1.5
CG1246	-0.675772	-0.675772	-0.090168	1.44171
CG12470	-0.858583	-0.774694	0.411121	1.22216
CG12493	-0.5	-0.5	-0.5	1.5
CG12499	-1.04403	1.33049	-0.365449	0.078993
CG12512	-0.582035	-0.582035	1.48894	-0.324866
CG12519	-0.5	-0.5	-0.5	1.5
CG12535	-0.623849	1.49401	-0.443706	-0.426456
CG12541	-0.5	-0.5	-0.5	1.5
CG12547	-1.46922	0.387222	0.310673	0.771323
CG12560	-0.5	-0.5	-0.5	1.5
CG12567	-1.48881	0.559084	0.60395	0.325772
CG12576	-1.49987	0.484015	0.516657	0.499195
CG12592	-0.504672	1.49997	-0.504672	-0.490623
CG12605	-0.5	-0.5	-0.5	1.5
CG12608	-1.37305	0.945416	-0.0406139	0.468252
CG12643	-0.561226	1.49835	-0.447483	-0.489637
CG1265	-1.16147	-0.431115	0.482472	1.11011
CG12655	-1.25215	0.0212536	0.0348885	1.19601
CG12659	-1.36264	1.00666	-0.0043185	0.360305
CG12674	0	0	0	0
CG12699	-0.86531	0.915077	-0.86531	0.815544
CG12702	-0.511316	1.49981	-0.511316	-0.477173
CG1271	-1.13875	0.513414	-0.476042	1.10138
CG12713	-0.827865	-0.827865	1.18742	0.468311
CG12717	-0.792473	-0.792473	1.28641	0.298536
CG12725	-0.5	-0.5	-0.5	1.5
CG12728	-1.31683	0.901183	-0.220797	0.636448
CG12730	-1.18871	1.21127	-0.255746	0.233182
CG12744	-1.03726	-0.231798	1.36429	-0.0952389
CG12746	-1.01734	1.3662	-0.0372085	-0.311657
CG1275	-1.36508	1.02331	0.046422	0.295344
CG12766	-0.5	-0.5	-0.5	1.5
CG12768	-0.812381	-0.812381	0.38803	1.23673
CG12773	-1.03211	1.35552	-0.31173	-0.0116796
CG12795	-1.44719	0.744944	0.579302	0.122943
CG12811	-1.05069	1.35791	-0.104006	-0.203213
CG12818	-1.16631	-0.0510939	-0.0606511	1.27806
CG12822	-1.3723	0.976034	-0.00878572	0.405053
CG12824	-0.516909	1.49956	-0.516909	-0.465746
CG12825	-0.5	-0.5	-0.5	1.5
CG12836	0	0	0	0
CG12848	-1.35597	0.667572	0.83346	-0.145064
CG12853	-0.5	-0.5	-0.5	1.5
CG12860	-0.5	-0.5	-0.5	1.5
CG12861	-0.5	-0.5	-0.5	1.5
CG12863	-1.269	0.324691	-0.175292	1.1196
CG12868	-0.835217	-0.628193	0.0847881	1.37862
CG12869	-0.509526	1.49986	-0.509526	-0.48081
CG12877	-1.00346	-0.409317	0.0631387	1.34964
CG12880	-0.5	-0.5	-0.5	1.5
CG12883	-1.3841	0.72661	0.741158	-0.0836709
CG12895	-1.37898	-0.0882076	0.649034	0.818156
CG12896	-0.807131	1.25107	-0.807131	0.363194
CG12909	-0.863412	1.42283	-0.471538	-0.0878802
CG12910	-0.955699	-0.733087	0.596178	1.09261
CG12913	-0.553347	1.49548	-0.553347	-0.388785
CG12920	-0.5	1.5	-0.5	-0.5
CG12926	-0.5	1.5	-0.5	-0.5
CG12929	-1.0173	-0.605026	1.18737	0.434954
CG12934	-0.832163	1.39046	0.0512083	-0.609507
CG12935	1.49929	-0.525642	-0.517185	-0.456461
CG12942	-0.9623	1.102	-0.7217	0.581997
CG12945	-1.44465	0.173983	0.829527	0.44114
CG12947	-1.21594	1.18815	0.247775	-0.21998
CG12948	-1.44242	0.737134	0.100304	0.60498
CG12963	-0.723008	-0.723008	1.39719	0.0488264
CG12971	-0.5	-0.5	-0.5	1.5
CG12974	-0.981705	1.38256	-0.349492	-0.0513628
CG12975	-1.25602	-0.283788	1.04952	0.490295
CG12990	-0.5	-0.5	-0.5	1.5
CG12991	-1.21286	0.577345	-0.387112	1.02263
CG12992	-0.5	-0.5	-0.5	1.5
CG13001	-1.00433	0.834652	-0.715252	0.884928
CG13004	-0.866065	1.43898	-0.199398	-0.373515
CG13005	-0.705636	-0.00440282	-0.705636	1.41568
CG13010	-0.528257	1.49877	-0.528257	-0.442252
CG13012	-0.5	-0.5	-0.5	1.5
CG13014	-1.49462	0.571449	0.543492	0.379684
CG13016	-1.36488	0.731361	0.764829	-0.131307
CG13018	-1.34251	0.939249	-0.140538	0.543801
CG13025	-0.586058	1.48776	-0.586058	-0.315647
CG1307	-1.31447	1.11901	0.118606	0.076851
CG13074	-0.5	-0.5	-0.5	1.5
CG13077	-0.5	-0.5	-0.5	1.5
CG13085	-1.01412	0.553092	-0.652485	1.11351
CG13086	-1.49654	0.54608	0.402832	0.547627
CG13088	-0.920763	-0.584176	1.33493	0.170014
CG1309	-1.4821	0.711843	0.385069	0.385191
CG13096	-1.23356	0.338823	1.14136	-0.246626
CG13097	-1.249	0.168831	1.18355	-0.103378
CG13102	-0.5	-0.5	-0.5	1.5
CG13116	-1.38352	0.561213	-0.0540374	0.876348
CG13117	-0.129154	-1.33564	0.480814	0.983977
CG13123	-0.859143	0.705047	-0.859143	1.01324
CG13124	-1.25938	-0.304696	0.560712	1.00336
CG13126	-0.797136	1.4342	-0.547362	-0.0897
CG13127	-0.5	-0.5	-0.5	1.5
CG13144	-0.559054	1.49442	-0.559054	-0.376316
CG13151	-1.42533	0.711756	0.0348942	0.678683
CG13155	-0.567099	-0.567099	1.49273	-0.358534
CG13159	0	0	0	0
CG1316	-1.48388	0.346873	0.693739	0.443273
CG13160	0	0	0	0
CG13168	-0.5	-0.5	-0.5	1.5
CG1317	-1.24276	1.00364	-0.338518	0.577641
CG13185	-1.08226	0.40056	1.18817	-0.506478
CG13192	-0.887709	-0.779882	1.16039	0.507201
CG13197	-1.32492	-0.164419	0.511786	0.977557
CG13204	-0.5	1.5	-0.5	-0.5
CG13220	-1.4903	0.337438	0.593792	0.559069
CG13229	-0.5	-0.5	-0.5	1.5
CG1324	-0.5	-0.5	-0.5	1.5
CG13244	-0.5	-0.5	-0.5	1.5
CG13248	-0.5	-0.5	-0.5	1.5
CG13252	-0.824557	0.450111	-0.824557	1.199
CG13255	-0.5	-0.5	-0.5	1.5
CG13295	-1.49757	0.533704	0.419024	0.544844
CG13314	-0.5	-0.5	-0.5	1.5
CG13315	-1.36159	1.04721	0.159734	0.154644
CG13319	-0.994119	-0.65078	1.1655	0.479401
CG13321	-0.5	-0.5	-0.5	1.5
CG13339	-0.904138	-0.634338	0.223025	1.31545
CG13344	-0.965623	1.40408	-0.221151	-0.217307
CG13358	0	0	0	0
CG13360	-0.652841	1.45758	-0.652841	-0.151892
CG13364	-1.45156	0.182275	0.799288	0.469995
CG13365	1.49976	-0.524183	-0.494115	-0.481461
CG13366	-1.26164	1.01096	-0.295855	0.54653
CG13367	-0.980114	-0.73732	0.756374	0.96106
CG13369	-1.33704	0.997357	-0.112923	0.452605
CG13373	-1.10834	1.05617	-0.546069	0.59824
CG13375	-0.803775	-0.803775	0.347824	1.25973
CG13377	-0.57266	1.49651	-0.408148	-0.515698
CG13384	-1.02982	1.36947	-0.113524	-0.226128
CG13390	-0.964477	-0.253884	1.40389	-0.185529
CG13392	-0.860439	-0.860439	0.721549	0.999329
CG13397	-1.02236	1.27443	0.260509	-0.51258
CG13398	-1.4002	-0.0400965	0.702594	0.7377
CG13405	-1.13226	1.19031	-0.415985	0.357938
CG13409	-0.512677	1.49976	-0.512677	-0.474403
CG13436	-1.02136	0.360837	1.22706	-0.566535
CG1344	-1.34811	1.06487	0.0762177	0.207018
CG13482	-0.895594	-0.73912	1.21451	0.4202
CG13484	-1.34649	0.0400722	0.245789	1.06063
CG13488	-0.5	-0.5	-0.5	1.5
CG13506	-0.819604	-0.819604	0.424003	1.2152
CG13516	-0.857881	1.02545	-0.857881	0.69031
CG13531	-1.0446	1.31455	-0.40362	0.133667
CG1354	-1.37787	0.755834	0.721336	-0.0992994
CG13551	-1.4003	0.132594	0.964044	0.303658
CG13559	-0.550733	-0.550733	1.49592	-0.394459
CG13562	0	0	0	0
CG13563	-0.558422	-0.558422	1.49455	-0.377703
CG1358	-0.516309	1.49959	-0.516309	-0.466977
CG13585	-1.47835	0.253444	0.61792	0.606983
CG13599	-0.5	-0.5	-0.5	1.5
CG1360	-1.24811	-0.310104	1.03605	0.522163
CG13601	-1.30122	1.00626	-0.206626	0.501583
CG13603	-1.47084	0.572696	0.219613	0.678534
CG13604	-1.41002	0.91756	0.402223	0.0902376
CG13605	-1.19841	1.06883	-0.389639	0.519223
CG13609	-0.697968	-0.697968	1.42301	-0.0270702
CG13623	1.49856	-0.552302	-0.501311	-0.444945
CG13625	-1.27503	0.592675	-0.287413	0.969763
CG13630	-1.46029	0.365008	0.806959	0.288325
CG13631	-1.48565	0.633413	0.306759	0.545474
CG13654	-0.85082	1.44278	-0.19781	-0.394152
CG13663	-1.30966	0.373631	-0.126583	1.06262
CG13667	-0.859287	1.01178	-0.859287	0.706797
CG13671	-1.00439	-0.511372	1.29683	0.218935
CG13676	-0.5	-0.5	-0.5	1.5
CG13689	-1.35744	-0.116757	0.568139	0.906058
CG13690	-0.622033	-0.622033	1.47418	-0.230112
CG13692	-0.5	-0.5	-0.5	1.5
CG13707	-0.795867	1.27877	-0.795867	0.312968
CG1371	-0.949096	1.40008	-0.0889107	-0.36207
CG13739	-0.693388	-0.693388	1.42716	-0.0403871
CG13741	-0.5	-0.5	-0.5	1.5
CG13742	-0.5	-0.5	-0.5	1.5
CG13743	-0.5	-0.5	-0.5	1.5
CG13751	-1.498	0.554243	0.513496	0.430263
CG13760	-0.865945	0.882622	-0.865945	0.849269
CG13766	-1.21586	1.21703	-0.142949	0.141775
CG13773	-1.10093	0.210643	-0.37561	1.2659
CG13775	-0.634012	1.46831	-0.634012	-0.200289
CG13784	-0.866323	0.340463	1.26176	-0.735895
CG13807	-1.23212	-0.355007	1.01305	0.574083
CG13813	0	0	0	0
CG13827	-1.24922	-0.296113	1.0535	0.491828
CG13850	-1.27882	0.756402	0.833927	-0.311507
CG13868	-1.30818	-0.233712	0.921472	0.620423
CG13876	-1.07521	-0.599609	1.03974	0.635083
CG13877	-0.5	-0.5	-0.5	1.5
CG13887	1.37276	-0.774605	-0.709332	0.111176
CG13893	-1.21048	1.11333	-0.332563	0.429714
CG13895	1.49988	-0.498171	-0.516481	-0.485225
CG13896	-1.33495	-0.0388251	0.317576	1.0562
CG13898	-0.645623	1.46192	-0.645623	-0.170674
CG13901	-0.885601	-0.633802	1.33403	0.185371
CG13907	-1.22983	1.12379	-0.277879	0.38392
CG13917	-1.4415	0.0938119	0.623043	0.724642
CG13919	-1.08037	-0.323743	1.31125	0.0928651
CG13920	-0.859027	1.01441	-0.859027	0.703643
CG13921	-0.508075	1.4999	-0.508075	-0.483752
CG13926	-1.28692	0.378467	-0.173456	1.08191
CG13928	0	0	0	0
CG13933	-1.101	1.32575	-0.0627143	-0.16203
CG13937	-1.16539	-0.182814	1.26555	0.0826553
CG1394	-0.5	-0.5	-0.5	1.5
CG13982	-0.50569	1.49995	-0.50569	-0.48857
CG13992	-0.647771	1.46066	-0.647771	-0.165117
CG13994	-1.49133	0.345601	0.564826	0.580908
CG14005	-0.83725	1.42114	-0.52531	-0.0585765
CG14024	-0.5	-0.5	-0.5	1.5
CG14036	-0.5	1.5	-0.5	-0.5
CG14043	-1.45761	0.465528	0.207478	0.784606
CG14050	-0.509718	1.49986	-0.509718	-0.480421
CG14057	-1.1252	-0.164762	-0.0163646	1.30633
CG1407	-1.48427	0.523793	0.305144	0.655336
CG14072	-1.03062	0.215933	-0.475647	1.29033
CG14073	-1.39533	-0.0515719	0.680757	0.766142
CG14074	-0.880931	-0.362919	-0.190069	1.43392
CG14077	-0.5	-0.5	-0.5	1.5
CG14079	0	0	0	0
CG14100	-1.25546	-0.261414	1.07861	0.438272
CG14102	-0.853359	0.644656	-0.853359	1.06206
CG14104	-0.880259	-0.691004	1.2922	0.279064
CG14105	-1.166	-0.496416	0.753034	0.909377
CG14109	-0.688699	-0.0538543	-0.688699	1.43125
CG14113	-0.5	-0.5	-0.5	1.5
CG14117	-1.32744	0.861562	-0.20701	0.672883
CG14130	-1.44308	0.745769	0.5918	0.105507
CG14135	-1.04358	-0.66611	0.801289	0.908396
CG14142	-0.517642	1.49952	-0.517642	-0.464241
CG14154	-0.5	-0.5	-0.5	1.5
CG1416	-1.44666	0.209078	0.839762	0.39782
CG14174	-1.30268	1.11397	0.243171	-0.0544595
CG1418	-1.17085	-0.397717	1.13122	0.437347
CG14182	-1.03621	-0.595484	0.469108	1.16259
CG14183	-0.675528	1.4419	-0.675528	-0.0908426
CG14184	-1.41747	0.130988	0.372966	0.913517
CG14194	-1.4379	0.870487	0.200936	0.366481
CG14200	-0.932931	1.38906	-0.00883175	-0.447297
CG14207	-1.05443	1.01565	-0.634782	0.673565
CG14210	-1.49613	0.518768	0.574906	0.402453
CG14220	-1.06873	-0.529375	1.18674	0.411359
CG14221	-0.5	-0.5	-0.5	1.5
CG14223	-0.5	-0.5	-0.5	1.5
CG14229	-1.15681	0.156735	-0.254006	1.25408
CG14230	-0.988309	-0.431967	1.35359	0.0666878
CG14231	1.4884	-0.320728	-0.589006	-0.57867
CG14232	-1.13701	-0.540067	0.906551	0.770523
CG14252	-0.5	-0.5	-0.5	1.5
CG14253	-1.32721	-0.216402	0.759661	0.783956
CG14257	-0.5	-0.5	-0.5	1.5
CG14260	-0.5	-0.5	-0.5	1.5
CG14270	-1.48992	0.523045	0.62334	0.343533
CG14273	-0.699166	-0.699166	1.42189	-0.0235618
CG14285	-0.5	-0.5	-0.5	1.5
CG14286	-1.00382	-0.676012	0.590497	1.08934
CG14292	-1.43992	0.851987	0.412076	0.175862
CG14297	-0.5	-0.5	-0.5	1.5
CG14302	-0.840948	1.13355	-0.840948	0.548349
CG14312	-0.5	-0.5	-0.5	1.5
CG14322	-0.831995	1.45362	-0.338632	-0.282998
CG14325	-0.5	-0.5	-0.5	1.5
CG1434	-1.23091	1.04671	0.523554	-0.339358
CG14341	-0.98435	-0.370878	-0.0206631	1.37589
CG14352	-0.864648	-0.864648	0.795595	0.933701
CG14367	-0.5	-0.5	-0.5	1.5
CG1440	1.48945	-0.33078	-0.558721	-0.599952
CG14401	-0.806672	-0.806672	0.361072	1.25227
CG14407	-1.3374	-0.19225	0.717493	0.812159
CG14408	-1.35824	0.845864	-0.136519	0.648894
CG14411	-1.05164	0.0227517	-0.311463	1.34035
CG14414	-1.40909	-0.00447119	0.794486	0.619071
CG14431	-0.606307	-0.606307	1.48083	-0.268213
CG14434	-1.48809	0.556887	0.610356	0.320843
CG14435	-1.33356	0.359657	-0.0689338	1.04284
CG14440	-1.08353	1.23942	-0.45053	0.294646
CG14441	-0.5	-0.5	-0.5	1.5
CG14442	1.48723	-0.657933	-0.339111	-0.490184
CG14450	-1.36642	0.267091	0.0714896	1.02784
CG14459	-0.5	-0.5	-0.5	1.5
CG14464	-1.18434	-0.467333	0.912179	0.739499
CG14478	-1.42308	0.654842	0.0299029	0.738333
CG14480	-1.25933	-0.333763	0.926355	0.666742
CG14483	1.44591	-0.84138	-0.398975	-0.205552
CG14490	-1.46629	0.323415	0.786291	0.356581
CG14502	-0.595825	-0.595825	1.48464	-0.292987
CG14511	-1.11447	-0.545941	0.628445	1.03197
CG14512	-1.31192	0.857854	0.695998	-0.241928
CG14516	-0.936951	0.137567	1.34407	-0.544683
CG14535	0	0	0	0
CG14543	-1.49384	0.597629	0.517654	0.37856
CG14544	-0.832684	1.16925	-0.832684	0.496123
CG14556	-0.5	-0.5	-0.5	1.5
CG14561	-0.970099	1.39988	-0.156233	-0.27355
CG14562	1.49444	-0.377581	-0.572258	-0.544604
CG14567	-0.5	-0.5	1.5	-0.5
CG14589	-0.5	-0.5	-0.5	1.5
CG14609	-0.672711	1.44402	-0.672711	-0.0986002
CG14610	-0.900465	-0.830553	0.841687	0.88933
CG14613	-1.30182	-0.00166318	1.12909	0.174399
CG14615	-0.689869	1.48096	-0.300829	-0.490257
CG14618	-1.26402	-0.183107	1.12459	0.322536
CG14621	-0.862233	1.38695	0.0500894	-0.57481
CG14629	1.0755	0.523008	-0.417054	-1.18145
CG1463	-0.724115	1.46078	-0.555998	-0.180669
CG14641	1.49768	-0.57694	-0.470832	-0.449906
CG14642	-0.790689	1.29031	-0.790689	0.291067
CG14645	-0.619334	1.48977	-0.339861	-0.530574
CG14646	-1.32217	0.58573	0.932848	-0.196406
CG14647	-1.31902	0.207238	0.00852933	1.10325
CG14650	-0.884265	1.43424	-0.344935	-0.205044
CG14655	-0.528852	1.49871	-0.528852	-0.441009
CG14657	-1.43992	0.760986	0.581403	0.0975279
CG14667	-1.39225	0.0947196	0.973476	0.324054
CG14671	-1.4944	0.605318	0.39399	0.495096
CG14683	-1.3736	0.119671	1.0224	0.231522
CG14688	-0.73963	0.102532	-0.73963	1.37673
CG14692	-0.5	-0.5	-0.5	1.5
CG14695	-0.686446	1.4862	-0.390043	-0.409712
CG14696	-0.557099	1.49775	-0.425656	-0.514991
CG14701	-1.44505	0.188139	0.420463	0.836448
CG14710	-0.966869	-0.71185	0.566062	1.11266
CG14711	-0.863531	-0.863531	0.770632	0.956429
CG14712	-0.74564	1.44703	-0.578883	-0.122511
CG14715	-1.45794	0.519576	0.755702	0.182662
CG14721	-1.33995	0.0777054	1.07938	0.182859
CG14722	-1.49975	0.51315	0.474076	0.512524
CG14740	-0.5	-0.5	-0.5	1.5
CG14757	-0.558113	1.49461	-0.558113	-0.378379
CG14762	-0.508206	1.4999	-0.508206	-0.483487
CG14764	-0.888551	1.40819	-0.474851	-0.0447828
CG14767	-0.861639	1.34852	-0.643785	0.156907
CG14777	-1.37459	0.674871	0.802759	-0.103036
CG14780	-0.5	-0.5	-0.5	1.5
CG14785	-0.537265	1.49783	-0.537265	-0.423304
CG14787	-0.517121	1.49955	-0.517121	-0.465311
CG14803	-0.600343	1.48305	-0.600343	-0.282367
CG14805	-1.38776	0.851637	-0.0522001	0.58832
CG14806	1.49829	-0.552359	-0.509278	-0.436652
CG14812	-1.43741	0.501447	0.11843	0.817537
CG14814	-0.875389	1.43935	-0.320369	-0.24359
CG14817	1.4888	-0.564339	-0.324933	-0.599523
CG14818	-1.45978	0.205379	0.485573	0.768824
CG14834	-0.562717	1.49368	-0.562717	-0.368249
CG14855	-0.521647	1.49928	-0.521647	-0.455986
CG1486	-1.43155	0.0620398	0.751934	0.617579
CG14860	-0.5	-0.5	-0.5	1.5
CG14879	-0.860715	-0.860715	0.996136	0.725294
CG14881	-0.836549	1.15336	-0.836549	0.519736
CG14882	-0.832435	1.17023	-0.832435	0.49464
CG14883	-1.27812	0.639309	-0.294464	0.933271
CG14894	1.13268	-1.2962	-0.0267193	0.190233
CG14903	1.44528	-0.824462	-0.449556	-0.171262
CG14906	-1.24908	0.188627	1.17905	-0.118595
CG14907	-1.43135	0.069281	0.778017	0.584054
CG1492	-0.758764	-0.758764	1.34915	0.16838
CG14937	-0.85517	1.04848	-0.85517	0.661864
CG1494	-0.567127	1.49273	-0.567127	-0.358473
CG14957	-0.5	1.5	-0.5	-0.5
CG14961	-0.618775	1.47565	-0.618775	-0.238101
CG14963	-0.508366	1.49989	-0.508366	-0.483163
CG14964	-0.5	-0.5	-0.5	1.5
CG14965	-0.5	-0.5	-0.5	1.5
CG14966	-1.44045	0.684572	0.670152	0.0857298
CG14969	-1.46934	0.649849	0.2061	0.613393
CG14971	-1.42662	0.253055	0.261136	0.912429
CG14977	-1.36872	-0.0639112	0.935737	0.496898
CG14984	-0.94465	1.40617	-0.121633	-0.339889
CG14985	-1.2323	-0.359973	1.0013	0.590974
CG14990	-0.865979	-0.865979	0.878709	0.853248
CG14995	-1.14256	-0.492088	0.576117	1.05853
CG14997	-1.48848	0.603721	0.322938	0.561825
CG15011	-1.47524	0.469844	0.281909	0.723489
CG15012	-1.4885	0.324884	0.551781	0.611839
CG15014	-1.36198	-0.0394848	0.98482	0.416641
CG15019	-1.47781	0.635461	0.590709	0.251641
CG15027	-1.47003	0.336437	0.770891	0.362701
CG15034	0	0	0	0
CG15040	-0.5	-0.5	-0.5	1.5
CG15043	-0.5	-0.5	-0.5	1.5
CG15073	-1.22656	0.280229	-0.222982	1.16931
CG15083	-0.870959	1.24647	-0.743291	0.36778
CG15084	-1.10227	-0.537327	0.543984	1.09561
CG15093	-0.791229	1.41754	-0.0229763	-0.603334
CG15097	-0.608801	-0.608801	1.47985	-0.262246
CG15098	-1.41055	0.943975	0.305399	0.16118
CG15099	-0.83067	1.44747	-0.419275	-0.197528
CG15107	-1.21967	1.21216	0.150437	-0.142925
CG15109	-0.639589	1.46533	-0.639589	-0.186154
CG15111	-1.47395	0.692203	0.24464	0.537106
CG15117	-1.33038	-0.0383278	1.06641	0.302301
CG15118	1.49425	-0.616087	-0.471228	-0.406936
CG15127	-0.672939	-0.672939	-0.0979743	1.44385
CG1513	-1.39482	0.0598831	0.384761	0.950179
CG15141	-1.09487	-0.601173	0.876012	0.820032
CG15143	-0.5	-0.5	-0.5	1.5
CG15144	-0.5	-0.5	-0.5	1.5
CG15145	-0.5	-0.5	-0.5	1.5
CG15160	-0.844728	0.235003	-0.706405	1.31613
CG15168	-1.28041	1.03348	0.485402	-0.238475
CG15170	-0.508626	1.49989	-0.508626	-0.482635
CG15186	-0.827619	0.141207	1.35798	-0.671566
CG15196	-0.5	-0.5	-0.5	1.5
CG15200	-0.638847	1.46574	-0.638847	-0.188043
CG15201	-0.609356	1.47963	-0.609356	-0.260915
CG15202	-0.755588	-0.755588	1.35406	0.157112
CG15209	-0.775954	1.31982	-0.775954	0.232087
CG15210	1.41817	-0.905746	-0.119945	-0.392476
CG15211	-0.910092	1.37088	0.0747661	-0.535558
CG15219	-0.852363	1.06905	-0.852363	0.635671
CG1523	-1.39899	0.567934	-0.0174511	0.84851
CG15237	-1.36631	0.921156	-0.0820487	0.527201
CG15247	-0.71101	-0.71101	1.41024	0.0117754
CG15278	-0.531914	-0.531914	1.49842	-0.434592
CG1529	-1.44388	0.693042	0.65204	0.0987931
CG15293	-0.727944	-0.616805	-0.0975196	1.44227
CG15309	-1.11673	1.18171	-0.453418	0.388442
CG15312	-0.744706	1.44558	-0.115832	-0.585047
CG15317	-1.18308	0.939392	-0.464742	0.708432
CG1532	-1.48627	0.542982	0.311509	0.631776
CG15322	-0.5	-0.5	-0.5	1.5
CG15332	-0.5	-0.5	-0.5	1.5
CG15333	0	0	0	0
CG15336	-0.5	-0.5	-0.5	1.5
CG15343	-1.06871	-0.567627	0.504427	1.13191
CG15347	0.248862	-1.42956	0.276187	0.904513
CG15353	-0.5	-0.5	-0.5	1.5
CG15356	-0.941127	-0.574692	1.32145	0.19437
CG15362	-1.34521	0.104279	0.167925	1.073
CG15365	-0.969941	1.40099	-0.257685	-0.17336
CG15375	0	0	0	0
CG15382	-0.513447	1.49973	-0.513447	-0.472831
CG15385	-0.849724	-0.849724	1.08624	0.613208
CG15387	-1.2504	-0.364337	0.813631	0.801104
CG15390	-0.777638	-0.460876	1.46066	-0.222145
CG15399	-0.870219	-0.461974	-0.0895259	1.42172
CG15418	-0.5	-0.5	-0.5	1.5
CG1542	-0.92487	1.42154	-0.26403	-0.232642
CG15422	-0.513228	1.49973	-0.513228	-0.473278
CG15423	-0.566599	1.49284	-0.566599	-0.359646
CG15432	-1.46322	0.703104	0.185437	0.574677
CG15435	-1.35017	1.00046	-0.0649149	0.414628
CG15436	-0.840892	-0.840892	1.13381	0.547974
CG15439	-1.33875	0.715455	0.812464	-0.189174
CG1544	-0.960116	1.1581	0.499909	-0.697898
CG15443	-0.970303	-0.384616	1.38197	-0.0270546
CG15445	-1.19469	1.1484	-0.332388	0.378678
CG15449	-0.821692	1.44455	-0.162907	-0.459952
CG15456	-1.4216	0.235395	0.261375	0.924833
CG15482	-0.5	-0.5	-0.5	1.5
CG15484	-0.524223	1.4991	-0.524223	-0.450651
CG15514	1.49684	-0.556939	-0.53151	-0.408392
CG15525	-1.44918	0.3392	0.264465	0.845512
CG15530	-0.5	-0.5	-0.5	1.5
CG15531	-0.5	-0.5	-0.5	1.5
CG15535	-1.27956	0.88692	-0.303192	0.69583
CG15536	-1.30324	-0.256615	0.877759	0.682096
CG15543	-0.5	1.5	-0.5	-0.5
CG15547	-1.05036	1.3245	0.0919022	-0.36604
CG15561	-1.03442	-0.373848	1.33604	0.0722286
CG15579	-0.5	-0.5	-0.5	1.5
CG15597	-0.5	-0.5	-0.5	1.5
CG15601	-1.02277	-0.282908	-0.0618266	1.36751
CG15602	-1.47989	0.402042	0.355331	0.722516
CG15611	-0.909584	1.23233	0.387227	-0.709977
CG15628	-0.563665	1.49348	-0.563665	-0.366153
CG15642	-0.534766	1.49812	-0.534766	-0.428588
CG15643	-1.08226	1.31788	-0.296892	0.06127
CG15650	-0.85327	-0.85327	1.0627	0.643838
CG15653	-1.05725	-0.650761	0.859697	0.848318
CG15657	0	0	0	0
CG15673	-0.826147	1.45401	-0.258146	-0.369718
CG15674	-0.739193	-0.150001	1.4535	-0.564304
CG15695	1.42694	-0.0451405	-0.631257	-0.750544
CG15696	-0.5	-0.5	-0.5	1.5
CG15701	-0.5	-0.5	-0.5	1.5
CG15706	-1.24675	-0.0678771	0.120243	1.19438
CG15715	-1.48987	0.549135	0.605005	0.335727
CG15717	-1.48098	0.421942	0.345277	0.713759
CG1572	-0.627045	0.717821	0.976235	-1.06701
CG15725	-0.5	1.5	-0.5	-0.5
CG15739	-0.541678	1.49728	-0.541678	-0.413921
CG15740	-0.643985	1.49111	-0.384354	-0.462768
CG15743	-0.771965	1.46508	-0.439821	-0.253297
CG15744	-0.974927	1.38951	-0.0791574	-0.335426
CG15747	-1.3072	-0.251002	0.69471	0.863489
CG1575	-1.06482	1.08999	-0.594718	0.569551
CG15771	-1.34031	1.0508	-0.0247756	0.314281
CG1578	-0.819553	1.41552	-0.569144	-0.026819
CG15784	-0.737261	1.45174	-0.573654	-0.140821
CG15814	-1.43895	0.86981	0.358384	0.210754
CG15818	-0.859194	-0.756916	1.24564	0.370472
CG1582	-1.10709	1.27598	-0.341316	0.172422
CG15820	-0.895804	-0.828448	0.973225	0.751028
CG15822	-0.5	-0.5	1.5	-0.5
CG15861	-1.04489	0.0437173	1.33878	-0.337609
CG15864	-0.740092	-0.740092	1.37612	0.104068
CG15870	0	0	0	0
CG15877	-1.11856	-0.55681	0.704732	0.970638
CG15879	-1.36739	-0.045909	0.452247	0.96105
CG15891	-1.32902	-0.200957	0.87202	0.657956
CG15892	-0.738608	1.37807	-0.738608	0.099143
CG15908	-1.47406	0.231089	0.6465	0.596472
CG15909	-0.947446	0.484246	1.16984	-0.706636
CG15912	-1.34999	0.897949	-0.14074	0.592786
CG15914	-1.13547	-0.523242	1.0044	0.654311
CG15916	-0.950634	-0.177274	-0.281261	1.40917
CG15922	-1.04951	1.25032	-0.497318	0.296508
CG15923	-0.556636	1.49489	-0.556636	-0.381613
CG1598	-1.43991	0.0837254	0.675011	0.681176
CG1602	-0.5	-0.5	-0.5	1.5
CG1603	-1.30315	-0.111489	0.327346	1.08729
CG1607	1.39869	-0.81447	0.0316614	-0.615879
CG1620	-1.48697	0.64584	0.325512	0.515616
CG1622	-1.44214	0.291394	0.86966	0.281087
CG1628	-0.768951	-0.429147	1.46704	-0.268945
CG1635	-1.20963	-0.190086	0.189438	1.21028
CG1636	-1.07733	-0.55631	0.504162	1.12947
CG1637	-1.46366	0.179586	0.619298	0.664774
CG1638	-0.5	-0.5	-0.5	1.5
CG1640	-1.47571	0.317983	0.738528	0.419203
CG1646	-1.48322	0.511571	0.303766	0.667885
CG1647	-0.916394	1.30061	-0.636421	0.252207
CG1648	-0.473799	-1.15148	1.06645	0.558835
CG1662	-1.46806	0.233487	0.736065	0.498504
CG1663	-0.954646	-0.247291	-0.206859	1.4088
CG16700	-1.09584	-0.130837	1.33085	-0.104171
CG1671	-0.615839	1.49072	-0.526291	-0.34859
CG16710	-1.27461	-0.165397	1.11446	0.32555
CG16711	-1.44891	0.825727	0.200566	0.422618
CG16713	-0.70163	-0.472846	1.48011	-0.305633
CG16717	-1.34716	-0.166566	0.680309	0.833419
CG16721	-1.47914	0.72059	0.430174	0.32838
CG1673	-0.581094	1.4892	-0.581094	-0.327015
CG16734	-1.01999	0.73359	0.973998	-0.687594
CG1674	-0.865067	0.807453	-0.865067	0.92268
CG16743	-0.609807	1.47945	-0.609807	-0.259831
CG16753	-1.47061	0.424549	0.757476	0.288588
CG16758	-0.575592	-0.575592	1.49068	-0.339497
CG1677	-1.26601	1.17001	-0.0608681	0.156868
CG16779	-0.5	-0.5	-0.5	1.5
CG16782	-1.16917	-0.312406	0.272854	1.20872
CG16787	-1.49282	0.59619	0.364483	0.532152
CG16789	-0.910073	0.256925	1.29932	-0.646168
CG16790	-1.05934	-0.559088	1.16668	0.451753
CG16791	-0.5	-0.5	-0.5	1.5
CG16812	-1.30669	0.591284	-0.2284	0.943807
CG16824	-0.5	-0.5	-0.5	1.5
CG16863	-0.849562	-0.849562	1.08724	0.611884
CG16865	-1.4809	0.508024	0.680869	0.292006
CG16868	-0.810439	1.24215	-0.810439	0.378724
CG16890	-1.36921	-0.0734049	0.920434	0.522182
CG16896	-0.8252	1.45544	-0.282431	-0.347809
CG16903	-1.31916	1.11266	0.0876798	0.118828
CG16908	-0.596544	-0.596544	1.48439	-0.291302
CG16926	-1.11783	0.426648	-0.469744	1.16093
CG16935	-1.49818	0.449376	0.566453	0.482347
CG16952	-1.12308	1.30099	0.034108	-0.212019
CG16953	-1.32152	1.06193	-0.0849156	0.344498
CG16957	0	0	0	0
CG16972	-1.33969	0.643621	-0.175768	0.871834
CG16974	-1.03759	1.36191	-0.25166	-0.0726632
CG16979	-1.06831	1.24954	-0.465402	0.284178
CG16985	-1.15119	0.0777914	1.27582	-0.202421
CG16986	-1.23529	-0.234093	1.14683	0.322557
CG16989	-1.17347	0.528714	-0.431134	1.07589
CG17002	-1.3525	0.654215	-0.150335	0.848618
CG17019	-1.42166	0.830884	0.534142	0.0566342
CG17028	-0.5	-0.5	-0.5	1.5
CG17029	-0.741034	1.43792	-0.0834441	-0.613437
CG1703	-1.41813	0.0565471	0.852174	0.509412
CG17032	-0.789435	1.29301	-0.789435	0.285863
CG17036	-0.5	-0.5	-0.5	1.5
CG17059	-1.48319	0.416418	0.70328	0.363496
CG17065	-1.27688	-0.0803629	0.208478	1.14876
CG17068	-1.05582	1.3398	-0.299863	0.0158779
CG17075	-0.5	-0.5	-0.5	1.5
CG17078	-1.16298	-0.0332101	1.28035	-0.0841651
CG17104	-0.5	-0.5	-0.5	1.5
CG17109	-0.656767	1.45509	-0.656767	-0.141553
CG17110	-0.539206	1.4976	-0.539206	-0.419185
CG17118	-0.644224	1.48805	-0.336245	-0.507577
CG17119	-0.982011	1.38919	-0.0965575	-0.310621
CG17124	-1.06261	1.25617	0.27346	-0.467027
CG17129	-0.5	-0.5	-0.5	1.5
CG17141	-1.37725	-0.0480611	0.918963	0.506346
CG17162	-0.5	1.5	-0.5	-0.5
CG17163	-0.832968	1.16812	-0.832968	0.497814
CG17167	-0.717532	0.031752	-0.717532	1.40331
CG17168	-1.42392	0.0507168	0.570354	0.802851
CG17186	-1.1272	-0.317927	0.182125	1.263
CG17187	-1.17554	0.18097	-0.241212	1.23579
CG17189	0	0	0	0
CG17202	-1.39139	-0.0318087	0.87014	0.553059
CG17219	-0.676069	1.44149	-0.676069	-0.0893478
CG1722	-0.98692	1.10183	0.577117	-0.692025
CG17221	-0.966685	1.27201	-0.600377	0.295052
CG17230	-0.798341	-0.798341	0.323682	1.273
CG17233	-0.869289	1.41451	-0.4904	-0.0548207
CG17249	-1.15881	-0.496012	0.972164	0.68266
CG17258	-0.5	-0.5	-0.5	1.5
CG17260	-1.23894	-0.368706	0.668153	0.939495
CG17261	-0.5	-0.5	-0.5	1.5
CG17266	-1.42463	0.827346	0.530527	0.0667612
CG17270	0	0	0	0
CG17271	-1.48859	0.457312	0.662583	0.368699
CG17272	-1.20474	-0.409526	0.609709	1.00456
CG17278	-0.933929	1.38937	-0.0112407	-0.444197
CG17292	-0.5	-0.5	-0.5	1.5
CG17294	-1.47357	0.515351	0.251169	0.707049
CG17327	-1.19415	-0.373841	1.1041	0.463893
CG17328	-0.5	-0.5	-0.5	1.5
CG17333	-1.23414	-0.389313	0.750357	0.873096
CG17343	-1.22624	-0.330447	0.482099	1.07458
CG17350	-0.524449	1.49908	-0.524449	-0.450183
CG17359	-0.781048	-0.227098	-0.452539	1.46068
CG17361	-1.25809	-0.146965	0.250572	1.15448
CG1737	-1.4159	0.935255	0.190328	0.290321
CG17376	-0.5	-0.5	-0.5	1.5
CG17377	-0.543756	1.49699	-0.543756	-0.40948
CG1738	-0.979977	0.758612	-0.737743	0.959108
CG17385	-1.26164	-0.301085	0.561634	1.00109
CG17387	-0.865923	-0.865923	0.88473	0.847117
CG17440	-0.5	-0.5	-0.5	1.5
CG17454	-1.20269	-0.441597	0.764234	0.880049
CG17486	-1.29155	-0.287933	0.761319	0.818163
CG17490	-0.975198	-0.733238	0.693012	1.01542
CG17493	-1.42117	0.684949	0.0216333	0.714592
CG1750	-1.2074	0.452137	-0.347818	1.10308
CG17508	-1.35856	-0.0892071	0.50212	0.945643
CG17528	-1.32652	1.09098	0.0120244	0.223511
CG17544	1.49241	-0.544902	-0.357782	-0.589728
CG17549	-0.5	-0.5	-0.5	1.5
CG17556	-1.12906	1.27993	-0.269887	0.119017
CG17565	-1.49619	0.398755	0.537611	0.55982
CG17568	-1.14633	-0.251056	0.130124	1.26726
CG17570	-0.838434	0.32123	1.27351	-0.756309
CG17574	-1.23953	1.17962	-0.157494	0.217404
CG17593	-1.49531	0.599984	0.4881	0.407224
CG17597	-1.10709	1.30648	-0.25394	0.0545549
CG17598	-1.38233	-0.0293611	0.920171	0.491518
CG17600	-1.34529	0.771617	-0.17699	0.750658
CG17612	-1.09381	-0.295872	1.30739	0.0822911
CG17637	-0.772082	1.32686	-0.772082	0.217302
CG1764	-1.45864	0.223432	0.445013	0.790196
CG17646	-0.707449	1.47878	-0.473016	-0.298313
CG17650	0	0	0	0
CG17652	-1.29474	-0.26927	0.900472	0.66354
CG17660	-1.06036	1.34042	-0.280902	0.00084132
CG17666	-0.5	-0.5	-0.5	1.5
CG17681	-0.892301	-0.788959	1.13048	0.550779
CG17683	-1.48392	0.297805	0.538891	0.647222
CG17684	-0.723595	-0.723595	1.39651	0.0506755
CG17691	-1.48467	0.489585	0.322953	0.672132
CG17698	-1.36653	0.528692	-0.0821356	0.91997
CG17707	-0.5	-0.5	-0.5	1.5
CG17712	-1.39459	-0.0554793	0.706216	0.743849
CG17715	-0.686208	1.47859	-0.275876	-0.516507
CG17721	-1.43127	0.15402	0.401925	0.875327
CG17724	-0.764794	1.33941	-0.764794	0.190182
CG17726	-1.32591	0.224636	0.00975226	1.09152
CG17734	-1.49376	0.480028	0.617382	0.396351
CG1774	-0.534427	1.49882	-0.444007	-0.520382
CG17746	-1.38878	0.280813	0.11888	0.989089
CG17754	-1.37969	0.487579	-0.0339351	0.926048
CG17760	-1.31805	-0.233961	0.733261	0.818746
CG17765	-1.4396	0.0850585	0.715516	0.639026
CG17768	-1.11685	-0.562558	0.953657	0.72575
CG17776	-1.3123	0.552307	0.964814	-0.204817
CG17786	-0.926352	1.17591	0.478526	-0.728088
CG17802	-1.03179	-0.562617	1.21422	0.380189
CG17806	-1.11291	1.20144	-0.440532	0.352004
CG17807	-0.829406	1.45123	-0.390513	-0.231315
CG17816	-1.36703	-0.0883554	0.54834	0.907049
CG17829	-0.985797	0.404051	-0.629924	1.21167
CG17834	-1.10053	-0.578828	0.69189	0.987465
CG17839	-0.509789	1.49985	-0.509789	-0.480276
CG17841	-1.39537	0.205303	0.984044	0.206024
CG1785	-1.21269	1.20581	0.197594	-0.190709
CG17855	-1.41339	0.438191	0.896752	0.078447
CG17883	-1.43335	0.193399	0.883965	0.355982
CG1789	-1.45675	0.152438	0.607195	0.697114
CG17896	-1.23574	1.16589	0.270734	-0.200889
CG17904	-1.4765	0.450321	0.300209	0.72597
CG17919	-0.55441	1.49529	-0.55441	-0.386472
CG1792	-1.42542	0.0414153	0.625988	0.75802
CG17928	-0.821701	1.45643	-0.284389	-0.350341
CG17931	-0.927882	1.38726	-0.463177	0.00379874
CG17977	-0.780078	-0.780078	0.248142	1.31201
CG17982	-1.08077	-0.620221	0.833581	0.867411
CG17985	-1.35709	-0.100672	0.521948	0.935813
CG17996	-1.38187	0.0969636	0.999912	0.28499
CG18004	-1.29823	-0.269074	0.700093	0.867214
CG1801	-0.5	-0.5	-0.5	1.5
CG18011	-1.31535	-0.240189	0.811811	0.743727
CG18048	-1.15971	0.807326	0.8622	-0.50982
CG1806	-0.803999	0.348839	-0.803999	1.25916
CG18081	1.49069	-0.355566	-0.62737	-0.507756
CG18088	-0.5	-0.5	-0.5	1.5
CG18094	-0.72759	-0.72759	0.0633412	1.39184
CG1812	-1.18401	0.000263115	1.26176	-0.078019
CG18131	-0.56516	1.49316	-0.56516	-0.362843
CG18135	-1.26961	1.14932	-0.112946	0.233239
CG1814	-0.925874	1.04635	-0.781573	0.661092
CG1815	-1.34395	0.711393	0.810066	-0.177509
CG18155	-1.21089	0.460775	-0.346083	1.0962
CG18171	-1.37799	0.462078	-0.0258726	0.941785
CG18178	-1.35598	0.160341	1.05653	0.139115
CG18180	-0.531828	1.49843	-0.531828	-0.434774
CG18213	-0.814416	-0.0675126	1.42668	-0.544751
CG1824	-1.35484	-0.120612	0.562562	0.912894
CG18249	-0.64272	1.48994	-0.359937	-0.487281
CG18259	-1.36376	0.511723	0.933614	-0.0815738
CG18262	-0.5	-0.5	-0.5	1.5
CG1827	-1.41473	0.936809	0.29692	0.181003
CG18273	-0.89808	1.43131	-0.302997	-0.23023
CG18278	-0.834014	1.28337	0.302772	-0.752132
CG18281	-1.11227	-0.381378	0.245877	1.24777
CG18324	-1.09129	-0.342657	1.29299	0.140956
CG18335	-0.5	1.5	-0.5	-0.5
CG18336	-0.5	-0.5	-0.5	1.5
CG18343	-1.3138	0.15227	1.1175	0.0440245
CG1835	-0.774959	1.32166	-0.774959	0.228262
CG18371	-0.5	-0.5	-0.5	1.5
CG1840	-1.44205	0.861939	0.358249	0.221858
CG18428	-1.48749	0.324343	0.528113	0.635034
CG18446	-0.518783	1.49946	-0.518783	-0.461895
CG18449	-0.5	-0.5	-0.5	1.5
CG1847	-1.4462	0.439369	0.180439	0.826387
CG18473	-0.640672	1.46473	-0.640672	-0.18339
CG18476	-1.10783	-0.109703	1.32273	-0.105191
CG18477	-0.5	1.5	-0.5	-0.5
CG18480	-0.672262	-0.672262	1.44436	-0.099832
CG18507	-0.5	-0.5	-0.5	1.5
CG18508	-1.47932	0.718812	0.433744	0.326767
CG18528	-0.82186	-0.82186	1.20798	0.435738
CG18547	-1.44263	0.358255	0.223962	0.860414
CG18549	-0.659955	1.48523	-0.317708	-0.507564
CG18557	-1.08727	-0.538921	0.492811	1.13338
CG18558	-0.862542	-0.518873	-0.0278471	1.40926
CG18563	-1.17199	-0.467538	0.998381	0.64115
CG18568	-0.5	-0.5	-0.5	1.5
CG18596	-1.06473	1.34902	-0.197363	-0.0869254
CG18600	-1.46258	0.471903	0.766844	0.223837
CG18605	-0.565485	1.49309	-0.565485	-0.362121
CG18622	-0.971721	-0.00111958	-0.403116	1.37596
CG18628	-0.5	-0.5	-0.5	1.5
CG18659	-1.29478	-0.276783	0.708221	0.863341
CG18661	-0.758042	1.47096	-0.295115	-0.417801
CG18662	-0.5	-0.5	-0.5	1.5
CG18731	-1.37671	-0.0874066	0.844334	0.619782
CG18744	-0.5	1.5	-0.5	-0.5
CG18747	-0.676469	1.45777	-0.153923	-0.627378
CG18749	-0.800666	-0.800666	0.333903	1.26743
CG18754	-0.692811	1.47335	-0.539652	-0.240888
CG18764	-1.41185	0.940712	0.162231	0.308906
CG18766	-1.4857	0.546763	0.306773	0.632166
CG18787	-1.27244	1.11604	0.326305	-0.169904
CG18789	-1.00712	1.07892	-0.675846	0.604043
CG18808	-0.5	1.5	-0.5	-0.5
CG18809	-0.768634	-0.768634	1.33291	0.204361
CG18815	-1.40149	-0.000269714	0.537523	0.864234
CG1882	-0.750455	1.44569	-0.576895	-0.118335
CG18858	-0.52228	1.49924	-0.52228	-0.454678
CG18870	-1.29278	0.801304	-0.286175	0.77765
CG1888	-0.910153	1.39238	-0.48259	0.000361634
CG1890	-1.46726	0.19765	0.667394	0.602216
CG1896	-0.97071	-0.564093	1.29736	0.237443
CG1902	-1.17323	1.2009	-0.314666	0.286993
CG1907	-1.47847	0.262556	0.553309	0.662604
CG1910	1.4464	-0.806581	-0.157604	-0.48221
[truncated: 6,543 more rows]

## Sheet: LM3
gene	Unwouned_AverageExpression	Wounded_AverageExpression	Wasp inf. 24h_AverageExpression	Wasp inf. 48h_AverageExpression
128up	-1.459	0.765851	0.495832	0.19732
14-3-3epsilon	-0.632994	-1.0568	0.679379	1.01041
14-3-3zeta	1.1807	0.473703	-0.746515	-0.90789
140up	-1.13745	1.19313	0.347056	-0.402736
18SrRNA-Psi:CR41602	1.36616	0.0833948	-0.529798	-0.91976
18w	-0.5	-0.5	1.5	-0.5
26-29-p	1.01558	0.662715	-0.593122	-1.08518
28SrRNA-Psi:CR40741	1.45975	-0.161573	-0.663375	-0.634797
28SrRNA-Psi:CR41609	1.48586	-0.324286	-0.50197	-0.659606
28SrRNA-Psi:CR45853	1.4891	-0.326178	-0.58146	-0.58146
28SrRNA-Psi:CR45855	1.14895	-1.17801	-0.367438	0.396493
28SrRNA-Psi:CR45859	1.42995	-0.889649	-0.364463	-0.175843
28SrRNA-Psi:CR45860	1.36413	0.133406	-0.743767	-0.753768
312	-1.08032	-0.389115	1.2833	0.186131
4E-T	1.33483	0.170426	-0.920391	-0.584864
5.8SrRNA-Psi:CR45854	-0.5	-0.5	-0.5	1.5
5.8SrRNA-Psi:CR45863	-0.749642	-0.320519	1.47388	-0.403717
5PtaseI	-1.37524	0.283358	0.0810085	1.01087
a	1.48155	-0.651805	-0.280854	-0.548891
A16	-0.13942	-1.31111	1.04893	0.401602
a6	-0.683827	-0.683827	-0.0676802	1.43533
AANATL2	-0.5	-0.5	-0.5	1.5
Aatf	0.685537	-0.841505	1.02923	-0.873264
aay	-0.454655	1.25869	-1.06751	0.263477
ab	1.45069	-0.123967	-0.668188	-0.658532
ABCA	-0.794881	1.43483	-0.548719	-0.0912336
ABCB7	1.34928	-0.0945431	-1.06516	-0.189574
ABCD	-0.0581263	0.783263	-1.39218	0.667045
abd-A	0	0	0	0
Abi	-0.829235	0.905441	-0.901133	0.824927
Abl	0.859858	0.789174	-1.19747	-0.451559
abo	-1.34329	0.751384	-0.181448	0.773352
Abp1	-0.720316	-0.382536	1.48058	-0.377732
abs	-1.34951	0.449282	-0.0845651	0.984793
Ac13E	-0.549864	1.49607	-0.549864	-0.396339
Ac3	-0.673825	-0.673825	-0.0955369	1.44319
Ac76E	1.48295	-0.706179	-0.40411	-0.372659
Ac78C	-1.07817	-0.605641	0.678931	1.00488
Acbp1	0.0101827	-1.29531	1.1407	0.144431
Acbp3	-0.813699	-0.813699	0.394429	1.23297
Acbp5	-0.5	1.5	-0.5	-0.5
Acbp6	-0.849766	-0.849766	1.08597	0.613559
ACC	1.40831	0.00236356	-0.60126	-0.809412
AcCoAS	1.47458	-0.71709	-0.268105	-0.48939
Ace	-0.862583	-0.862583	0.971682	0.753484
Acer	-0.512366	1.49977	-0.512366	-0.475036
achi	-1.02131	0.808613	-0.693791	0.906489
acj6	-0.5	-0.5	-0.5	1.5
Ack	-0.800035	-0.800035	1.26896	0.331111
Ack-like	-0.857746	-0.3859	1.44098	-0.19733
Acn	-0.778445	-0.947638	0.919271	0.806812
Acox57D-d	-0.5	1.5	-0.5	-0.5
Acox57D-p	1.31826	0.209221	-0.924696	-0.602786
Acp95EF	-0.5	1.5	-0.5	-0.5
Acph-1	1.06276	0.455402	-1.26442	-0.253746
Acsl	1.06788	0.611317	-0.644551	-1.03464
Act42A	-0.993846	-0.704692	0.658008	1.04053
Act57B	-0.586944	-0.313608	-0.586944	1.4875
Act5C	-0.349839	0.382096	-1.1847	1.15244
Act79B	-0.860032	-0.860032	1.00387	0.71619
Act87E	-0.740065	-0.740065	0.103976	1.37615
Act88F	-0.5	-0.5	-0.5	1.5
Actbeta	0	0	0	0
Actn	-1.06373	1.34992	-0.091962	-0.194234
Acyp2	-1.1535	-0.470836	1.06566	0.558678
Ada	-0.641418	-0.641418	-0.181482	1.46432
Ada1-1	-0.5	-0.5	-0.5	1.5
Ada1-2	-0.568105	1.4925	-0.568105	-0.356294
Ada2a	1.21422	-0.826439	-0.813358	0.425577
Ada2b	1.44117	-0.47417	-0.823096	-0.143903
AdamTS-A	-1.02273	-0.684996	0.969282	0.738443
Adar	1.03591	0.601742	-1.15337	-0.484285
Adck1	-0.759816	1.34749	-0.759816	0.172144
Adck5	1.40838	-0.603059	-0.807952	0.00263472
ADD1	0.800285	0.257659	0.402031	-1.45997
AdenoK	1.17051	0.251496	-0.183922	-1.23808
Adf1	-0.78908	-0.924244	1.02308	0.690248
Adgf-A	-1.26071	-0.340208	0.88226	0.718663
Adh	0.517753	1.11415	-1.09795	-0.533957
Adi1	0.182829	-1.33441	1.08709	0.0644879
AdipoR	-0.667267	-0.944678	0.379854	1.23209
Adk1	-0.623583	-0.980889	0.376892	1.22758
Adk2	-0.825661	0.120621	1.36622	-0.661184
Adk3	1.26726	0.332728	-0.75893	-0.841056
AdoR	-0.572276	-0.572276	-0.346963	1.49152
adp	1.20193	0.411258	-1.01282	-0.600362
AdSL	-0.943214	1.36374	-0.494984	0.074455
AdSS	0.897112	0.833486	-0.904079	-0.826519
Aduk	-0.624692	1.47294	-0.624692	-0.223553
Ady43A	-0.887826	-0.546322	0.0519025	1.38225
Aef1	-1.37586	-0.102848	0.77902	0.699687
aft	1.47057	-0.221226	-0.68817	-0.561172
Afti	0.315413	-0.20284	1.13808	-1.25066
Ag5r2	-0.5	-0.5	-0.5	1.5
AGBE	-0.794054	0.305221	-0.794054	1.28289
AgmNAT	-0.5	-0.5	-0.5	1.5
ago	-1.44201	0.148719	0.822969	0.470324
AGO1	1.37045	0.113036	-0.675767	-0.807723
AGO2	-1.47306	0.237786	0.6905	0.54477
AGO3	-0.827359	1.18923	-0.827359	0.465483
Agpat1	-0.5	1.5	-0.5	-0.5
Agpat3	-0.723709	1.47993	-0.385578	-0.370644
Agpat4	0	0	0	0
agt	0.639403	1.06609	-0.863891	-0.841606
AhcyL1	1.03311	-1.33658	0.375557	-0.0720951
AIF	-0.10461	0.652807	0.824228	-1.37242
AIMP1	1.30483	-1.11815	0.0286216	-0.215302
AIMP2	-1.18318	0.208233	1.22282	-0.247869
AIMP3	-0.381455	-1.21685	1.01878	0.57953
Ak6	-0.81693	0.065083	1.3873	-0.63545
Akap200	-0.0952188	-1.37439	0.629692	0.83992
Akh	-0.855521	-0.855521	0.665344	1.0457
akirin	0.20736	-1.18109	-0.250688	1.22441
Akt1	1.35107	-0.339122	-1.02923	0.0172804
Aladin	-0.687889	1.44093	-0.665468	-0.0875766
Alas	-1.01735	1.36052	-0.337553	-0.00562311
alc	1.47199	-0.242548	-0.518153	-0.711289
Aldh	0.839653	0.787177	-1.23297	-0.393862
Aldh-III	1.27798	0.0737662	-0.202732	-1.14901
Aldh7A1	0.821694	0.650852	-0.097127	-1.37542
Alg-2	-1.26345	-0.340361	0.831452	0.772358
Alg1	-0.665538	0.60325	1.07786	-1.01557
Alg10	1.49316	-0.54258	-0.365104	-0.585475
Alg11	-1.0301	-0.11206	1.36922	-0.22706
Alg14	-1.37824	-0.0986806	0.732739	0.744182
Alg2	-1.43034	0.0696293	0.78878	0.571931
Alg9	-1.17205	1.0063	0.630559	-0.464805
Alh	-0.804256	-0.0177833	1.41476	-0.592719
alien	0.478788	-0.92408	1.17598	-0.730689
ALiX	1.24862	0.367447	-0.814808	-0.80126
Alk	-0.5	-0.5	-0.5	1.5
AlkB	-0.862082	-0.862082	0.745332	0.978831
Alp12	-0.933597	1.09444	-0.757795	0.596956
alph	-1.39863	-0.0433569	0.687175	0.754813
alpha-Cat	-1.14888	-0.220965	0.0962668	1.27357
alpha-Est1	-0.5	1.5	-0.5	-0.5
alpha-Est10	-0.5	-0.5	-0.5	1.5
alpha-Est3	0	0	0	0
alpha-Est7	0.389781	1.23566	-0.803048	-0.822392
alpha-Est8	1.27322	0.278349	-0.554729	-0.996844
alpha-Est9	1.353	0.0426225	-0.386611	-1.00901
alpha-Man-Ib	0.913201	0.792748	-0.649893	-1.05606
alpha-Man-Ic	0	0	0	0
alpha-Man-IIb	-0.842418	-0.683882	0.189633	1.33667
alpha-PheRS	-0.754085	-0.0376597	1.42459	-0.632843
alpha-Spec	0.929372	0.799269	-0.823474	-0.905167
alpha4GT1	0.635634	0.83013	-1.3781	-0.0876591
alphaCOP	1.02272	0.658564	-1.07191	-0.609373
alphaSnap	0.812789	0.227463	-1.45462	0.414372
alphaTub67C	-0.651581	1.45835	-0.651581	-0.155192
alphaTub84B	-1.0767	-0.624778	0.888421	0.813061
alphaTub84D	1.48796	-0.325476	-0.534492	-0.627988
alphaTub85E	-1.20958	-0.37648	0.530958	1.05511
Alr	-0.696211	1.47466	-0.526506	-0.251938
Als2	-0.635782	1.46738	-0.635782	-0.195821
alt	1.16589	-0.400393	0.387771	-1.15327
Ama	0.299574	1.28573	-0.809441	-0.775862
Amacr	-0.97486	-0.702806	1.11126	0.56641
amn	-0.5	-0.5	-0.5	1.5
AMPdeam	-0.873361	-0.821912	1.09736	0.597914
Amph	-0.675325	-0.675325	-0.0914046	1.44205
AMPKalpha	1.42759	-0.26241	-0.909942	-0.255234
Amun	-1.0198	-0.351681	0.016475	1.35501
amx	-1.32554	-0.210156	0.866794	0.668905
ana1	1.47422	-0.231388	-0.641726	-0.601105
ana2	1.48837	-0.362753	-0.463659	-0.661958
ana3	-0.5	-0.5	-0.5	1.5
Ance	-0.167231	0.130775	1.2336	-1.19715
Ance-2	-0.778481	1.45918	-0.211741	-0.468959
Ance-3	0	0	0	0
Ance-4	-0.5	-0.5	-0.5	1.5
Ance-5	1.21292	0.427472	-0.838215	-0.802177
anchor	-1.15432	0.835023	-0.518329	0.837626
angel	-1.18761	0.515207	-0.404766	1.07717
Ank	0.342029	0.314493	-1.46153	0.805008
Ank2	-0.5	-0.5	-0.5	1.5
anne	1.17972	0.277113	-1.21333	-0.243506
anox	-1.09302	1.28384	0.168085	-0.358902
Ant2	-0.584459	1.48824	-0.584459	-0.31932
Antp	-0.62138	-0.62138	1.47448	-0.231718
antr	1.49999	-0.501978	-0.501978	-0.496037
AnxB10	0.575635	1.03487	-1.19308	-0.417424
AnxB11	1.05524	0.623483	-1.04994	-0.628776
AnxB9	-1.2938	-0.133783	0.33353	1.09405
aop	1.32036	0.202997	-0.927705	-0.595652
aos	-0.829959	-0.829959	1.17972	0.480193
Aos1	1.27212	-0.479762	0.250976	-1.04333
AOX1	-0.609043	1.47975	-0.609043	-0.261666
AOX3	-0.794458	1.32673	0.217071	-0.749341
ap	-0.5	-0.5	-0.5	1.5
AP-1-2beta	0.583381	1.00335	-1.23726	-0.349474
AP-1gamma	1.45773	-0.452143	-0.790001	-0.21559
AP-1mu	-1.1992	1.21893	-0.20471	0.184986
AP-1sigma	-1.08133	-0.500495	0.385224	1.1966
AP-2alpha	1.24519	-0.111682	-1.19707	0.0635634
AP-2mu	0.786391	0.931092	-0.999774	-0.717709
AP-2sigma	-0.894805	-0.827194	0.733652	0.988347
Apc	-1.3239	0.0669718	0.152625	1.10431
APC10	-1.27727	1.16001	-0.0310878	0.148348
Apc2	1.35302	0.120592	-0.551011	-0.922599
APC4	-1.1953	1.13481	0.405492	-0.345006
ApepP	1.19763	0.0939453	-0.0446387	-1.24694
Apf	1.05724	-1.18749	-0.416349	0.546599
aph-1	-1.20106	-0.428129	0.661244	0.967945
aPKC	0.534148	1.04402	-1.22463	-0.353537
Apl	1.42568	-0.0425451	-0.62408	-0.759051
Aplip1	-0.5	-0.5	-0.5	1.5
Apoltp	1.49997	-0.504301	-0.504301	-0.491371
app	1.43208	-0.156857	-0.873686	-0.401532
APP-BP1	-0.881503	1.38655	-0.546541	0.0414941
Appl	-0.5	-0.5	-0.5	1.5
Aprt	-1.07728	-0.480362	1.22357	0.334064
Aps	-1.43548	0.874822	0.188409	0.372253
apt	0.433646	1.2074	-0.882256	-0.75879
aqz	0.0263849	1.13149	-1.30306	0.145187
aralar1	1.34151	0.18387	-0.723027	-0.802354
Arc1	-1.03128	-0.575855	0.407718	1.19942
Arc2	-1.20453	-0.399591	1.0288	0.575319
Arc42	-1.43623	0.227866	0.882809	0.32555
Archease	-1.32974	1.07354	-0.0243253	0.280526
Arf102F	-1.22113	-0.386609	0.986829	0.620914
Arf51F	-0.712258	-1.00715	0.850647	0.868758
Arf79F	-0.876516	-0.764025	1.20905	0.43149
ArfGAP1	-0.425613	0.130736	1.32181	-1.02693
ArfGAP3	-0.0865966	0.909601	0.544128	-1.36713
Arfip	-1.34205	1.06676	0.0303531	0.244943
Arfrp1	0.94611	-1.40986	0.162509	0.301246
arg	-0.535141	1.49808	-0.535141	-0.427796
Argk	-0.854199	0.652486	-0.854199	1.05591
Argl	0.477686	-1.00224	1.16498	-0.640428
ArgRS-m	-1.05045	1.27556	0.236857	-0.46196
ari-1	-1.43737	0.104771	0.533892	0.798711
ari-2	1.42619	-0.099619	-0.858431	-0.46814
Arl1	0.689021	-1.15928	-0.496556	0.96682
Arl2	-1.18064	-0.376561	0.423724	1.13347
Arl4	0.60025	-1.4916	0.539467	0.351878
Arl5	0.681211	-1.48287	0.489447	0.312215
Arl6IP1	-1.39527	-0.0540293	0.719152	0.73015
arm	1.37803	0.0972372	-0.696596	-0.778672
armi	-0.742144	-0.742144	1.37337	0.11092
Arp1	-1.09224	0.619871	-0.573504	1.04588
Arp10	-1.43094	0.829669	0.0965419	0.504726
Arp2	0.495724	0.718876	-1.47328	0.258682
Arp3	-0.993005	-0.722055	0.752983	0.962078
Arp5	1.07508	0.566856	-1.11669	-0.52525
Arp6	1.33459	-0.991955	0.125502	-0.468135
Arp8	-1.23453	0.204633	1.18716	-0.157262
Arpc1	0.871783	-0.197133	-1.33069	0.656042
Arpc2	-0.560535	-1.09311	0.578184	1.07546
Arpc3A	0.571157	-0.424492	-1.18752	1.04086
Arpc3B	-1.35707	-0.140919	0.658107	0.839881
Arpc4	-1.08454	-0.615391	0.840526	0.859407
Arpc5	-1.21412	-0.419993	0.732299	0.901811
arr	-0.544348	1.49691	-0.544348	-0.408212
Ars2	-1.35167	-0.130073	0.911574	0.570171
Art1	1.44381	-0.359104	-0.227571	-0.857132
Art3	-0.662779	1.48913	-0.383326	-0.443027
Art4	-0.607939	-0.607939	1.48019	-0.264312
Art7	1.02986	0.678024	-0.956962	-0.750925
Art8	-0.926283	0.197117	1.32305	-0.59388
Arts	0.940915	0.786418	-0.910483	-0.816851
aru	-0.771909	-0.955153	0.848212	0.87885
Arv1	1.44628	-0.622554	-0.110675	-0.713053
arx	-0.445466	1.4871	-0.366542	-0.67509
Asap	-1.00628	1.38345	-0.15436	-0.222806
Asator	0.206404	0.149768	-1.37632	1.02015
Asciz	-0.607959	-0.607959	-0.264263	1.48018
asf1	1.38295	-0.880725	-0.555794	0.0535704
ash1	-0.830783	1.44128	-0.457154	-0.153346
ash2	-0.996443	-0.256146	-0.134297	1.38689
asl	-0.745228	1.4589	-0.532295	-0.181379
AsnRS-m	-1.24663	0.420022	1.09443	-0.267825
asp	0	0	0	0
Asph	1.49657	-0.546623	-0.546623	-0.403328
AspRS-m	0.667019	1.00919	-1.09481	-0.581395
asrij	0.160414	-1.1622	1.24982	-0.24803
asRNA:ASTR	-0.5	-0.5	-0.5	1.5
asRNA:CR17025	-0.5	-0.5	-0.5	1.5
asRNA:CR31144	-0.819798	-0.819798	1.21459	0.425005
asRNA:CR31514	1.49353	-0.563428	-0.563428	-0.366678
asRNA:CR31912	-0.5	-0.5	1.5	-0.5
asRNA:CR32252	-0.5	-0.5	-0.5	1.5
asRNA:CR42254	1.37933	-0.621606	0.0815696	-0.839291
asRNA:CR42547	-0.5	-0.5	-0.5	1.5
asRNA:CR42738	-0.775726	-0.915985	0.592599	1.09911
asRNA:CR43159	-0.5	-0.5	-0.5	1.5
asRNA:CR43257	-0.841125	-0.841125	0.549545	1.1327
asRNA:CR43425	1.5	-0.5	-0.5	-0.5
asRNA:CR43465	1.31602	0.213488	-0.927239	-0.602273
asRNA:CR43466	-0.753432	-0.753432	0.149544	1.35732
asRNA:CR43468	-0.860549	-0.860549	0.998061	0.723038
asRNA:CR43474	0	0	0	0
asRNA:CR43629	-0.5	-0.5	-0.5	1.5
asRNA:CR43683	-0.616534	-0.616534	1.47663	-0.243566
asRNA:CR43723	1.5	-0.5	-0.5	-0.5
asRNA:CR43730	-0.530786	1.49853	-0.530786	-0.43696
asRNA:CR43767	-0.5	-0.5	-0.5	1.5
asRNA:CR43786	-0.5	-0.5	-0.5	1.5
asRNA:CR43809	1.4766	-0.244853	-0.639325	-0.592422
asRNA:CR43812	0.813336	0.917021	-0.880844	-0.849513
asRNA:CR43824	-0.5	-0.5	-0.5	1.5
asRNA:CR43833	1.00461	0.715321	-0.859965	-0.859965
asRNA:CR43864	0	0	0	0
asRNA:CR43868	1.44281	-0.0941417	-0.674332	-0.674332
asRNA:CR43875	1.32363	0.224125	-0.773877	-0.773877
asRNA:CR43889	-0.611588	-0.611588	1.47872	-0.255545
asRNA:CR43906	-1.25403	0.488539	1.05198	-0.286481
asRNA:CR43916	1.44346	-0.110964	-0.756675	-0.575817
asRNA:CR43933	-0.5	-0.5	-0.5	1.5
asRNA:CR43944	-0.5	-0.5	-0.5	1.5
asRNA:CR43957	-0.527511	1.4173	-0.843098	-0.0466904
asRNA:CR43964	-0.5	1.5	-0.5	-0.5
asRNA:CR44019	0	0	0	0
asRNA:CR44021	-0.5	-0.5	-0.5	1.5
asRNA:CR44029	1.4502	-0.795317	-0.485471	-0.169415
asRNA:CR44030	0.257799	-1.3565	0.0544413	1.04426
asRNA:CR44031	0.777508	0.942066	-0.738288	-0.981286
asRNA:CR44047	-0.5	-0.5	-0.5	1.5
asRNA:CR44049	0	0	0	0
asRNA:CR44054	0	0	0	0
asRNA:CR44064	-0.5	1.5	-0.5	-0.5
asRNA:CR44065	-0.5	-0.5	-0.5	1.5
asRNA:CR44093	-0.538719	-0.538719	1.49766	-0.42022
asRNA:CR44095	1.03523	0.676611	-0.907399	-0.804442
asRNA:CR44114	-0.854267	-0.854267	0.653129	1.0554
asRNA:CR44116	0	0	0	0
asRNA:CR44119	-0.5	-0.5	-0.5	1.5
asRNA:CR44124	-0.5	-0.5	-0.5	1.5
asRNA:CR44134	-0.754973	1.355	-0.754973	0.154946
asRNA:CR44137	-0.5	-0.5	-0.5	1.5
asRNA:CR44147	-0.5	-0.5	-0.5	1.5
asRNA:CR44160	-0.842692	-0.842692	1.12508	0.560306
asRNA:CR44168	-0.5	-0.5	-0.5	1.5
asRNA:CR44169	0	0	0	0
asRNA:CR44179	0.74298	0.482611	-1.46837	0.242783
asRNA:CR44201	-0.661553	1.45193	-0.661553	-0.128823
asRNA:CR44224	-0.5	-0.5	-0.5	1.5
asRNA:CR44266	-0.5	1.5	-0.5	-0.5
asRNA:CR44267	-0.5	1.5	-0.5	-0.5
asRNA:CR44291	-0.507912	1.49991	-0.507912	-0.484081
asRNA:CR44321	0	0	0	0
asRNA:CR44340	-0.664744	-0.664744	1.44975	-0.120261
asRNA:CR44367	-0.501608	1.5	-0.501608	-0.496781
asRNA:CR44368	-0.633164	-0.633164	1.46875	-0.202423
asRNA:CR44372	-0.77632	0.0200505	-0.649229	1.4055
asRNA:CR44375	-0.5	-0.5	-0.5	1.5
asRNA:CR44381	-0.5	1.5	-0.5	-0.5
asRNA:CR44382	0	0	0	0
asRNA:CR44386	-0.5	-0.5	-0.5	1.5
asRNA:CR44390	-0.545149	1.49679	-0.545149	-0.406495
asRNA:CR44429	-1.21074	-0.178365	1.21295	0.176156
asRNA:CR44431	0.163729	1.35119	-0.757458	-0.757458
asRNA:CR44512	-0.5	-0.5	-0.5	1.5
asRNA:CR44690	-0.860882	-0.860882	0.994163	0.727602
asRNA:CR44704	-0.5	-0.5	-0.5	1.5
asRNA:CR44793	-0.549243	1.49617	-0.549243	-0.397681
asRNA:CR44806	0	0	0	0
asRNA:CR44807	-0.5	1.5	-0.5	-0.5
asRNA:CR44841	-0.5101	1.49985	-0.5101	-0.479645
asRNA:CR44843	-0.510139	-0.510139	1.49984	-0.479567
asRNA:CR44849	0	0	0	0
asRNA:CR44891	-0.793321	-0.793321	1.28453	0.302116
asRNA:CR44910	-0.865709	-0.865709	0.832618	0.8988
asRNA:CR44911	-0.5	-0.5	1.5	-0.5
asRNA:CR44959	-0.5	-0.5	-0.5	1.5
asRNA:CR44960	1.41999	-0.0181015	-0.719132	-0.682755
asRNA:CR44961	-0.544508	-0.544508	1.49689	-0.407868
asRNA:CR44962	1.42799	-0.0469285	-0.740347	-0.640718
asRNA:CR44968	0	0	0	0
asRNA:CR44969	0.79544	0.933844	-0.864642	-0.864642
asRNA:CR44972	-0.8554	-0.8554	0.664133	1.04667
asRNA:CR44976	-0.889491	0.19298	1.33035	-0.633835
asRNA:CR44981	1.49999	-0.502063	-0.502063	-0.495868
asRNA:CR44987	-0.611378	-0.611378	1.47881	-0.256052
asRNA:CR44996	-0.5	-0.5	-0.5	1.5
asRNA:CR45000	1.49643	-0.547565	-0.547565	-0.4013
asRNA:CR45007	1.47197	-0.229083	-0.556548	-0.686344
asRNA:CR45009	0	0	0	0
asRNA:CR45026	0	0	0	0
asRNA:CR45028	0.15091	1.35586	-0.796383	-0.710386
asRNA:CR45044	1.1965	0.452877	-0.863976	-0.785396
asRNA:CR45053	-0.799048	1.27132	-0.799048	0.326771
asRNA:CR45108	0	0	0	0
asRNA:CR45124	-0.843905	-0.843905	0.568864	1.11895
asRNA:CR45126	-0.777131	1.44627	-0.133927	-0.535207
asRNA:CR45131	-0.5	-0.5	-0.5	1.5
asRNA:CR45132	-0.513173	1.49974	-0.513173	-0.473391
asRNA:CR45135	-0.5	-0.5	1.5	-0.5
asRNA:CR45136	-0.5	-0.5	-0.5	1.5
asRNA:CR45139	1.49957	-0.468572	-0.526544	-0.504456
asRNA:CR45140	-1.24693	0.574041	-0.330357	1.00325
asRNA:CR45141	1.39261	0.0610274	-0.740331	-0.71331
asRNA:CR45142	0.0801848	1.3789	-0.611784	-0.847302
asRNA:CR45145	-0.5	-0.5	-0.5	1.5
asRNA:CR45160	1.27604	0.318034	-0.800191	-0.793888
asRNA:CR45164	-1.01376	1.29681	0.212407	-0.495458
asRNA:CR45171	0	0	0	0
asRNA:CR45175	-0.571301	1.49175	-0.571301	-0.34915
asRNA:CR45182	0	0	0	0
asRNA:CR45189	-0.5	-0.5	-0.5	1.5
asRNA:CR45190	-0.505395	1.49996	-0.505395	-0.489166
asRNA:CR45195	-0.5	1.5	-0.5	-0.5
asRNA:CR45198	-0.5	-0.5	1.5	-0.5
asRNA:CR45202	-0.593708	-0.593708	1.48535	-0.297932
asRNA:CR45208	-0.5	-0.5	-0.5	1.5
asRNA:CR45210	-0.762783	-0.762783	1.34272	0.18285
asRNA:CR45214	-0.5	1.5	-0.5	-0.5
asRNA:CR45264	0.818336	0.912186	-0.886369	-0.844153
asRNA:CR45275	1.46821	-0.257079	-0.75534	-0.455787
asRNA:CR45350	0.627215	1.07403	-0.796155	-0.905093
asRNA:CR45366	-0.5	-0.5	-0.5	1.5
asRNA:CR45367	1.48022	-0.265162	-0.592264	-0.622792
asRNA:CR45396	-0.857106	-0.857106	0.681778	1.03243
asRNA:CR45397	-0.615401	1.47712	-0.615401	-0.246321
asRNA:CR45445	-0.684293	-0.684293	1.43495	-0.066363
asRNA:CR45466	-0.625184	1.49349	-0.405537	-0.462773
asRNA:CR45467	-0.5	-0.5	-0.5	1.5
asRNA:CR45468	0	0	0	0
asRNA:CR45479	-0.5	-0.5	-0.5	1.5
asRNA:CR45485	0	0	0	0
asRNA:CR45501	-0.824416	-0.824416	0.449346	1.19949
asRNA:CR45518	0	0	0	0
asRNA:CR45520	0	0	0	0
asRNA:CR45528	-0.616114	1.47682	-0.616114	-0.244587
asRNA:CR45549	-0.512506	1.49976	-0.512506	-0.474749
asRNA:CR45604	1.04497	0.665661	-0.885509	-0.825116
asRNA:CR45612	-0.5	-0.5	-0.5	1.5
asRNA:CR45620	-0.5	-0.5	-0.5	1.5
asRNA:CR45683	-0.5	-0.5	-0.5	1.5
asRNA:CR45686	-0.5	1.5	-0.5	-0.5
asRNA:CR45714	-0.5	-0.5	-0.5	1.5
asRNA:CR45778	1.39571	0.0507612	-0.76378	-0.682688
asRNA:CR45789	-0.557004	1.49482	-0.557004	-0.380808
asRNA:CR45798	-0.146988	1.45449	-0.717206	-0.590301
asRNA:CR45804	0	0	0	0
asRNA:CR45806	1.48245	-0.278455	-0.601998	-0.601998
asRNA:CR45813	-0.5	-0.5	-0.5	1.5
asRNA:CR45814	-0.51577	1.49962	-0.51577	-0.46808
asRNA:CR45815	0	0	0	0
asRNA:CR45822	-0.682622	-0.682622	1.43632	-0.0710724
asRNA:CR45827	-0.5	-0.5	-0.5	1.5
asRNA:CR45831	-0.5	-0.5	-0.5	1.5
asRNA:CR45835	-0.5	-0.5	-0.5	1.5
asRNA:CR45865	-1.47602	0.742692	0.387736	0.345593
asRNA:CR45871	0	0	0	0
asRNA:CR45873	-0.5	-0.5	-0.5	1.5
asRNA:CR45874	-0.153376	0.847558	0.657194	-1.35138
asRNA:CR45889	-0.5	-0.5	-0.5	1.5
asRNA:CR45891	-0.5	-0.5	-0.5	1.5
asRNA:CR45895	-0.507275	1.49992	-0.507275	-0.48537
asRNA:CR45896	0	0	0	0
asRNA:CR45907	1.41728	-0.724277	-0.00990018	-0.683106
asRNA:CR45908	-0.5	-0.5	-0.5	1.5
asRNA:CR45912	0	0	0	0
asRNA:CR45925	-0.657711	1.45447	-0.657711	-0.139053
asRNA:CR45926	-0.753586	1.40988	0.0102196	-0.666514
asRNA:CR45928	-1.11922	-0.466711	0.424214	1.16171
asRNA:CR45929	-0.50933	1.49987	-0.50933	-0.481209
asRNA:CR45943	-0.5	-0.5	-0.5	1.5
asRNA:CR45952	-0.5	-0.5	-0.5	1.5
asRNA:CR45968	-0.5	1.5	-0.5	-0.5
asRNA:CR45969	-0.5	-0.5	-0.5	1.5
asRNA:CR45970	-0.584374	-0.584374	1.48826	-0.319515
asRNA:CR45999	1.09006	0.599144	-0.95885	-0.73035
asRNA:CR46020	0	0	0	0
asRNA:CR46033	0	0	0	0
asRNA:CR46044	-0.5	-0.5	-0.5	1.5
asRNA:CR46048	0	0	0	0
asRNA:CR46050	-0.5	-0.5	-0.5	1.5
asRNA:CR46055	-0.5	-0.5	-0.5	1.5
asRNA:CR46067	0.100716	1.35261	-0.498401	-0.954929
asRNA:CR46081	1.49999	-0.502411	-0.502411	-0.495168
asRNA:CR46089	-0.857726	-0.857726	0.688576	1.02688
asRNA:CR46093	-0.540892	-0.540892	1.49738	-0.415597
asRNA:CR46096	0	0	0	0
asRNA:CR46097	0	0	0	0
asRNA:CR46099	-0.641647	1.46419	-0.641647	-0.180897
asRNA:CR46104	-0.164959	1.46059	-0.639884	-0.655749
asRNA:CR46109	-0.5	-0.5	-0.5	1.5
ast	-0.997928	1.05865	0.633551	-0.694272
AstA	-0.5	-0.5	-0.5	1.5
AstA-R1	-0.5	1.5	-0.5	-0.5
asun	1.48985	-0.604244	-0.550269	-0.335334
Asx	1.46911	-0.668258	-0.593397	-0.207453
Atac1	-0.82613	-0.82613	0.458682	1.19358
Atac2	-0.272673	-1.05354	-0.0211073	1.34732
Atac3	1.43701	-0.135514	-0.837416	-0.46408
ATbp	-0.518847	1.49946	-0.518847	-0.461763
Ate1	1.29875	0.0442802	-1.12397	-0.219065
Atet	1.23298	0.393698	-0.784158	-0.842524
Atf-2	1.34394	0.168749	-0.859418	-0.653267
Atf3	0.391899	1.20075	-1.05741	-0.535243
Atf6	0.241005	-1.11809	-0.369905	1.24699
Atg1	0.199443	-0.88247	-0.645453	1.32848
Atg10	-1.00205	0.956751	0.757326	-0.71203
Atg101	-1.26787	-0.0996857	0.210781	1.15678
Atg12	1.44675	-0.510992	-0.790353	-0.145405
Atg13	1.16468	-0.930734	-0.729302	0.495357
Atg14	-1.41201	0.928685	0.125501	0.357819
Atg16	1.38455	-1.00551	-0.197181	-0.181858
Atg17	1.43724	-0.593863	-0.757872	-0.0855016
Atg18a	0.557147	-1.44617	0.125923	0.7631
Atg18b	-0.986719	-0.73469	0.910658	0.810751
Atg2	1.39863	0.0176675	-0.850545	-0.565758
Atg3	-1.42865	0.0455149	0.704717	0.67842
Atg4a	0.612451	-1.49223	0.514539	0.365241
Atg4b	1.25011	0.347109	-0.655073	-0.942142
Atg5	1.12487	0.0100945	-1.30589	0.170928
Atg6	0.518965	-1.28671	1.0085	-0.240756
Atg7	-1.38546	0.342	0.0639341	0.979521
Atg8a	-1.05483	-0.486455	0.289553	1.25174
Atg9	-1.04869	0.777843	-0.657835	0.928686
atilla	-1.00055	-0.715564	0.773363	0.942751
atl	1.19802	0.45093	-0.855152	-0.793801
atms	-1.37783	0.404613	0.968421	0.00480049
Atox1	-1.15291	1.16765	-0.399344	0.384597
ATP7	0.288859	1.20858	-1.15782	-0.339615
ATP8A	-0.769084	-0.946182	0.712408	1.00286
ATP8B	0.813847	0.915022	-0.810157	-0.918712
Atpalpha	0.826055	0.861855	-1.11811	-0.569802
ATPCL	-0.876242	1.43294	-0.387726	-0.168973
ATPsynC	-0.0875605	-0.88872	1.4171	-0.440824
ATPsynE	-1.03708	-0.161315	1.36743	-0.169044
ATPsynepsilonL	0	0	0	0
ATPsynF	-0.702113	-0.756401	1.38928	0.0692329
ATPsynGL	0.479721	-0.829877	-0.829877	1.18003
AttA	-0.5	-0.5	-0.5	1.5
AttB	-0.728057	1.39128	-0.728057	0.0648345
AttD	-0.866024	0.864122	-0.866024	0.867927
Atu	-0.779361	1.46355	-0.251136	-0.433057
Atx-1	-0.534968	1.4981	-0.534968	-0.428161
Atx2	-1.43202	0.0565949	0.697674	0.677755
Atxn7	-0.822305	1.44558	-0.452867	-0.170404
aub	-0.5	1.5	-0.5	-0.5
aurA	-0.686865	1.47767	-0.521967	-0.268833
aurB	0.525763	1.14924	-0.838212	-0.836792
aux	-0.560535	1.48483	-0.626344	-0.297951
ave	1.20301	-0.506158	-1.0743	0.377446
Aven	1.48294	-0.689447	-0.469954	-0.323544
awd	-0.358735	-0.604963	1.49204	-0.528341
axed	-0.948018	-0.745142	0.609272	1.08389
Axn	1.43414	-0.280398	-0.892357	-0.261384
Axs	-1.0234	-0.627688	0.512799	1.13829
Axud1	-1.3877	0.939325	0.0103862	0.437993
az2	-0.79746	1.27507	-0.79746	0.319844
b	0	0	0	0
B4	-1.39136	0.285422	0.122219	0.983722
B52	1.45645	-0.303108	-0.329906	-0.823435
B9d1	-0.5	-0.5	-0.5	1.5
bab1	-0.5	1.5	-0.5	-0.5
bab2	0	0	0	0
babo	0.446036	-1.49876	0.544527	0.508196
babos	-0.59072	-0.59072	1.48632	-0.304879
Bacc	1.21793	0.123738	-0.122511	-1.21915
baf	-0.330974	-1.01154	-0.0237509	1.36626
bai	-1.44821	0.265039	0.84896	0.334213
Baldspot	-0.012345	0.447719	0.945201	-1.38058
ball	-0.931283	-0.0914584	-0.383433	1.40617
bam	-0.5	1.5	-0.5	-0.5
Bap170	-0.798584	1.45164	-0.182018	-0.471038
Bap55	-1.34205	1.07586	0.187789	0.0784041
Bap60	1.46302	-0.199797	-0.735978	-0.527245
barc	1.42462	-0.897461	-0.149383	-0.377774
barr	-1.05002	-0.617851	0.584134	1.08374
baz	0.515476	1.15382	-0.764932	-0.904361
bb8	-0.5	-0.5	-0.5	1.5
bbc	-0.87403	0.503696	1.16338	-0.793043
bbg	-0.781448	-0.781448	1.30935	0.25355
bc10	1.29261	-0.587454	-0.958973	0.253815
BCAS2	-1.18824	-0.418024	1.05144	0.554817
bchs	-0.588164	1.39381	-0.842606	0.0369573
BCL7-like	1.45076	-0.176676	-0.798982	-0.475099
bcn92	-0.473985	-1.16529	1.01177	0.627507
Bdbt	1.4242	-0.684056	-0.70905	-0.031096
bdg	-1.45684	0.820848	0.2899	0.346094
bdl	-0.5	1.5	-0.5	-0.5
Bdp1	1.42166	-0.128216	-0.89766	-0.395785
be	-0.516061	0.216929	-0.999756	1.29889
BEAF-32	-0.224176	1.46798	-0.724957	-0.518851
beag	-1.18044	-0.0804632	1.26494	-0.00404371
beat-Ib	-0.885989	0.495283	1.16834	-0.777631
beat-Ic	-0.5	-0.5	-0.5	1.5
beat-IIIc	-0.5	-0.5	-0.5	1.5
beat-VI	-0.5	-0.5	-0.5	1.5
beg	1.13113	-0.407416	0.442091	-1.16581
bel	-0.420071	-0.248445	1.46084	-0.792321
Bem46	-0.334211	-1.26198	0.693674	0.902515
ben	0.989238	0.379526	-1.37017	0.00140643
Best1	-1.40821	0.284037	0.952211	0.171958
Bet1	0.832609	-1.44762	0.412477	0.202534
Bet3	-1.28087	-0.199198	0.405088	1.07498
Bet5	-0.625918	-0.808574	1.39752	0.0369708
beta-Man	1.49138	-0.361226	-0.507245	-0.622906
beta-PheRS	1.43077	-0.0953882	-0.829217	-0.506164
beta-Spec	0.672949	1.03163	-0.729667	-0.974915
beta'COP	-0.570328	1.42991	-0.0687936	-0.790789
beta3GalTII	-0.831662	-0.831662	1.17324	0.490084
beta4GalNAcTA	-1.39982	-0.0317393	0.629683	0.801874
beta4GalNAcTB	0.308783	-1.3063	1.09067	-0.0931528
beta4GalT7	-0.238932	1.16612	0.295755	-1.22295
betaCOP	0.346496	1.24677	-0.628906	-0.964358
betaggt-I	-0.797749	-0.922691	0.733176	0.987264
betaggt-II	1.24879	0.0962167	-1.1857	-0.15931
betaGlu	1.45277	-0.187266	-0.796522	-0.468982
betaTub56D	1.39293	0.0354055	-0.852745	-0.575595
betaTub60D	-1.06941	-0.628325	0.747846	0.94989
betaTub85D	-0.5	-0.5	-0.5	1.5
betaTub97EF	-0.995817	-0.696685	0.633298	1.0592
Bgb	-1.29549	-0.279176	0.831974	0.74269
bgm	-0.5	-0.5	-0.5	1.5
BHD	-1.05777	0.782091	0.922523	-0.646842
BI-1	0.602318	-0.965334	1.0869	-0.723879
bib	-0.5	-0.5	-0.5	1.5
bic	-0.289141	0.972589	0.590187	-1.27364
BicD	0.610498	-1.33548	-0.176473	0.90146
bif	-0.648782	-0.859419	0.161165	1.34704
bigmax	0.907708	0.823296	-0.871039	-0.859965
Bin1	-1.44441	0.188042	0.839225	0.417147
bin3	-0.531063	-1.12608	1.02459	0.632555
bip1	0	0	0	0
bip2	-0.935624	-0.778911	0.702203	1.01233
Bka	-1.25573	-0.320416	0.590143	0.986004
blanks	-0.5	-0.5	-0.5	1.5
Blimp-1	-0.529748	1.49863	-0.529748	-0.439135
Blm	-0.752217	1.47046	-0.275493	-0.442748
Blos1	-1.03862	-0.663839	0.725908	0.976549
Blos2	-1.0541	-0.5313	0.374449	1.21095
Blos3	-1.37434	-0.096134	0.837265	0.633204
Blos4	0.350848	-1.37394	0.994165	0.028925
blot	-0.5	-0.5	-0.5	1.5
blow	0.865015	0.866902	-0.881166	-0.850751
blp	1.40998	-0.942621	-0.317984	-0.149373
blw	-0.753598	0.0837719	1.3839	-0.714071
bma	-0.5	-0.5	-0.5	1.5
Bmcp	-1.26093	1.17831	-0.0541534	0.13677
bmm	-0.757782	-0.158402	-0.537141	1.45333
bnl	-0.5	-0.5	-0.5	1.5
boca	-0.681815	-0.950982	1.20224	0.430556
BOD1	-1.28207	0.669823	0.90621	-0.293961
boi	-0.504499	-0.504499	1.49997	-0.490972
bol	-0.805772	-0.805772	1.25462	0.356924
bon	0.923981	-0.847331	0.805876	-0.882527
bonsai	-1.4842	0.684183	0.332785	0.46723
bor	1.13329	0.544887	-0.766247	-0.91193
bora	1.49689	-0.407987	-0.544453	-0.544453
BORCS5	-1.47179	0.539776	0.698565	0.233445
BORCS6	-0.879762	-0.777531	1.18089	0.476399
BORCS7	-1.09525	-0.578897	1.01583	0.658326
borr	0.35194	0.805376	0.303901	-1.46122
botv	0.286347	1.25495	-0.491971	-1.04932
bou	-0.864883	-0.864883	0.927766	0.802
bowl	-1.08628	0.857311	-0.61312	0.842084
BoYb	1.4649	-0.184145	-0.640376	-0.640376
br	1.16388	0.461314	-1.04919	-0.576
Br140	-0.585453	1.48794	-0.585453	-0.317037
brat	1.09822	0.527827	-0.502122	-1.12392
Brca2	-0.645137	-0.307713	-0.532324	1.48517
Brd8	1.49301	-0.3678	-0.598687	-0.526521
Bre1	-0.279421	-1.29277	0.700125	0.872065
Brf	0.615512	0.898038	-1.33525	-0.178305
brk	1.49604	-0.55168	-0.548414	-0.395942
brm	1.45542	-0.193776	-0.475361	-0.786282
Brms1	-1.38507	-0.080885	0.749109	0.716848
brn	-1.34621	0.711458	0.807315	-0.172558
brp	-0.5	-0.5	-0.5	1.5
Bruce	-0.919335	1.41532	-0.367741	-0.128249
BRWD3	1.21316	0.382444	-1.03126	-0.56434
brwl	-0.964536	0.920795	-0.759427	0.803167
bs	-1.23447	0.212502	-0.16308	1.18505
bsf	-0.165416	1.21748	0.158418	-1.21049
Bsg	1.174	0.435891	-1.06556	-0.544333
Bsg25D	1.29815	0.200031	-0.472926	-1.02525
bsk	-0.551583	-1.06813	1.15852	0.461191
bt	1.42113	-0.0259051	-0.754064	-0.641165
BTBD9	-1.10188	1.18998	-0.471792	0.38369
BtbVII	-1.37914	0.922349	0.495711	-0.0389191
BthD	-1.19669	1.09977	-0.372094	0.469017
Btk29A	1.37174	0.109633	-0.80803	-0.673345
btl	-0.865474	-0.865474	0.821763	0.909184
btsz	-0.5	1.5	-0.5	-0.5
btz	-1.16735	1.2772	-0.0591478	-0.0507007
Bub1	1.25105	-0.298028	-1.14432	0.191295
Bub3	0.963734	-1.19622	0.66998	-0.437492
BubR1	-0.587241	1.49538	-0.511627	-0.396512
bug	1.42393	-0.911003	-0.182528	-0.330403
Bug22	-1.03542	0.666792	-0.656926	1.02555
BuGZ	-1.28866	1.09468	-0.150209	0.344192
bun	1.30386	0.192184	-0.479738	-1.0163
bur	-0.501765	-1.12902	0.547222	1.08356
bves	-0.893556	-0.588948	0.12652	1.35598
bw	-0.516514	1.49958	-0.516514	-0.466557
bwa	-1.06244	0.786227	-0.641296	0.917505
Bx	0	0	0	0
Bx42	0.586346	1.09146	-1.00832	-0.669485
by	-1.02537	-0.23559	1.37146	-0.110493
bys	1.38506	0.0810498	-0.745394	-0.720715
c(2)M	0	0	0	0
c(3)G	-1.18197	0.689695	0.955396	-0.463117
c11.1	-1.30701	0.532711	-0.207898	0.9822
c12.1	1.33144	-0.359068	-1.04547	0.0731027
c12.2	1.36038	-0.478206	0.0744603	-0.956632
C1GalTA	0.239863	1.31072	-0.669682	-0.880905
C3G	-1.3296	0.713538	-0.208329	0.824392
ca	-0.815725	-0.188387	-0.445304	1.44942
Ca-alpha1D	-0.632631	1.49101	-0.364897	-0.49348
Ca-alpha1T	-0.602765	-0.602765	1.48217	-0.276636
Ca-Ma2d	-0.5	-0.5	-0.5	1.5
CaBP1	-1.27633	0.574237	0.981431	-0.279339
cac	1.49958	-0.516655	-0.516655	-0.466266
cact	-0.328473	1.45482	-0.297404	-0.828945
cactin	-1.34011	0.304611	-0.0185307	1.05403
Cad86C	-0.712399	1.41842	-0.0129088	-0.693113
Cad87A	-0.50879	1.49988	-0.50879	-0.482303
Cad96Ca	-0.5	-0.5	-0.5	1.5
Cad99C	-0.660115	-0.660115	1.45289	-0.132664
CadN	-0.5	-0.5	-0.5	1.5
Caf1-105	-1.0644	0.119631	1.31097	-0.3662
Caf1-180	1.4248	-0.90046	-0.366239	-0.158098
Caf1-55	0.151779	0.954724	-1.40569	0.299183
cag	-0.553773	-1.12795	0.899824	0.781903
CAH1	-0.810139	-0.810139	0.377299	1.24298
CAH13	-0.5	-0.5	-0.5	1.5
CAH2	-0.53715	1.49785	-0.53715	-0.423547
CAH3	0.795336	0.584245	-1.42276	0.0431744
CAH7	-0.770283	-0.770283	0.210526	1.33004
CAHbeta	-0.5	-0.5	-0.5	1.5
cal1	0.530795	-1.40124	0.868779	0.0016676
CalpA	-1.15063	-0.408294	0.395917	1.16301
CalpB	0.922972	0.797172	-0.988897	-0.731246
CalpC	-0.568271	0.721421	-1.11216	0.959015
Cals	1.24472	-0.952061	-0.647044	0.354388
Calx	0	0	0	0
calypso	-0.5	-0.5	-0.5	1.5
Cam	-0.974223	-0.724599	0.645884	1.05294
CaMKI	-0.622196	-0.0673692	-0.743929	1.43349
CaMKII	-1.16438	-0.495079	0.935136	0.724322
Camp	-1.37398	-0.0641597	0.911364	0.526772
Camta	1.43394	-0.164564	-0.870372	-0.398999
cana	-0.5	-0.5	1.5	-0.5
CanA-14F	1.2782	0.287983	-0.951627	-0.614555
CanB2	0.874704	0.388538	-1.43351	0.170264
Cand1	1.12367	0.0545993	0.13205	-1.31032
CAP	-0.942713	-0.765088	0.669997	1.0378
Cap-D2	-0.623922	-0.623922	1.4733	-0.225455
Cap-D3	-0.677724	-0.677724	-0.084759	1.44021
Cap-G	-0.72188	1.39847	-0.72188	0.0452856
Cap-H2	-0.643842	1.46295	-0.643842	-0.175263
Caper	1.37769	0.0904301	-0.823759	-0.644364
Capr	1.4265	-0.128531	-0.418521	-0.879445
caps	-0.5	-0.5	-0.5	1.5
capt	-1.22553	-0.294514	0.40221	1.11784
capu	-1.30723	-0.256765	0.814924	0.749074
car	0.409396	-1.40963	0.915516	0.0847145
CARPB	-0.5	-0.5	-0.5	1.5
CarT	0	0	0	0
CASK	0.923104	0.231462	-1.42221	0.267641
casp	-0.348209	-0.973306	1.38816	-0.0666432
Cat	0.990213	0.720894	-0.989431	-0.721676
cathD	1.10479	0.531258	-0.536162	-1.09988
Catsup	0.00276067	0.987103	0.381341	-1.3712
cav	-1.27095	1.02894	-0.264153	0.506163
caz	1.15279	0.512759	-0.93556	-0.729988
cbc	-1.1454	0.0100526	-0.154631	1.28998
Cbl	1.41211	-0.142435	-0.934531	-0.33514
CBP	0	0	0	0
Cbp20	-1.38717	0.0997721	0.988027	0.299367
Cbp80	-1.05015	1.35716	-0.217474	-0.0895332
cbs	-1.40951	0.45369	0.896623	0.0591995
Cbs	1.41574	-0.12075	-0.380479	-0.914512
cbt	1.49908	-0.544688	-0.459437	-0.494958
Cby	-0.666258	-0.666258	-0.116175	1.44869
Cc2d2a	0	0	0	0
CCAP	-0.5	-0.5	-0.5	1.5
CCDC53	0.877257	-0.201027	0.652179	-1.32841
Ccdc56	0.499809	-1.45842	0.193187	0.765425
Ccdc58	-0.527458	-1.08894	1.14704	0.469354
Ccdc85	-0.520472	1.49936	-0.520472	-0.458413
CCHa2	0	0	0	0
Cchl	-1.21507	0.620852	0.990507	-0.39629
Ccm3	-0.915585	0.599774	-0.778071	1.09388
Ccs	-1.45728	0.379988	0.814009	0.263287
CCT2	-0.709796	-1.00671	0.927307	0.789197
CCT4	-1.38626	-0.0751094	0.779942	0.681425
CCT8	-0.778948	-0.892349	0.519158	1.15214
Ccz1	1.01112	-0.922024	-0.794061	0.704964
CD98hc	-1.15285	-0.277385	1.24953	0.180704
Cda5	-0.5	-0.5	-0.5	1.5
CDase	-0.581665	1.48904	-0.581665	-0.325711
cdc14	-1.39301	0.988686	0.213838	0.19049
Cdc16	-1.48397	0.609267	0.585791	0.288915
Cdc23	-0.817684	-0.252807	1.45571	-0.385218
Cdc27	1.49937	-0.530497	-0.461069	-0.507808
Cdc37	-1.096	-0.552695	1.0834	0.565294
Cdc42	0.912923	0.816964	-0.902939	-0.826948
CDC45L	1.39941	-0.73503	0.0424257	-0.706808
Cdc5	1.23604	-0.356526	0.252457	-1.13197
CDC50	-0.860803	1.37669	-0.597564	0.0816811
Cdc6	-0.946635	0.467184	-0.701201	1.18065
Cdep	0.84806	0.767916	-1.24697	-0.369008
CdGAPr	0.26745	1.29268	-0.922288	-0.63784
cdi	1.40075	-0.319278	-0.959764	-0.121708
Cdk1	1.15929	0.498411	-0.699116	-0.958581
Cdk12	1.48637	-0.680296	-0.441995	-0.364076
Cdk2	-1.44297	0.422339	0.840935	0.179697
CDK2AP1	-1.06151	1.33897	0.00592657	-0.28339
Cdk4	0.97261	-0.716855	-0.996049	0.740294
Cdk5	-0.206236	-1.28498	1.0574	0.433821
Cdk5alpha	-0.5	-0.5	-0.5	1.5
Cdk7	-1.07813	0.183876	-0.39072	1.28497
Cdk8	1.29139	0.256654	-0.958703	-0.589342
Cdk9	-1.28033	1.0874	-0.18611	0.379045
Cdlc2	-0.5	-0.5	-0.5	1.5
cdm	0.7392	0.968614	-1.02281	-0.685005
Cec2	0	0	0	0
CecA1	-0.688571	-0.688571	1.43136	-0.054222
CecA2	-0.636442	-0.575868	1.48036	-0.268051
CecB	-0.648921	-0.648921	1.45997	-0.162129
CecC	-0.94678	0.543947	1.13055	-0.72772
Ced-12	0.411675	-0.187243	-1.28914	1.0647
ced-6	1.27017	0.324609	-0.866744	-0.728039
Cen	0.495947	1.15991	-0.965264	-0.690591
CenB1A	0.863462	-1.22619	-0.403922	0.766647
CenG1A	-1.09411	1.01386	-0.581083	0.661337
Cenp-C	1.21227	0.408764	-0.967735	-0.6533
Cep135	-0.908046	0.285809	1.28584	-0.663607
cep290	0	0	0	0
Cep89	-0.5	-0.5	-0.5	1.5
Cep97	0.528232	1.02021	-1.26478	-0.283661
cer	-0.902095	0.365761	-0.70872	1.24505
Cerk	0.0190856	1.17178	0.0818744	-1.27274
cert	0.729731	-1.38301	-0.0865197	0.739796
cerv	-1.32157	0.485548	0.996039	-0.160017
Cf2	-1.4261	0.146576	0.388584	0.890936
Cfp1	1.45918	-0.811445	-0.3596	-0.28814
cg	-0.806749	0.576931	-0.882562	1.11238
CG10005	0	0	0	0
CG10011	0.767735	-0.600063	-1.09291	0.925235
CG10026	1.5	-0.5	-0.5	-0.5
CG10031	0	0	0	0
CG10038	-1.07223	1.19711	-0.514906	0.390034
CG10041	-0.5	-0.5	-0.5	1.5
CG10050	-0.779528	-0.779528	0.245983	1.31307
CG10053	-0.843617	-0.843617	0.566809	1.12042
CG10055	-0.13366	-1.08355	1.3391	-0.121896
CG10063	1.49493	-0.382421	-0.562633	-0.54988
CG10068	-1.40817	0.54573	0.847952	0.0144898
CG10075	-0.597197	-0.486401	-0.412055	1.49565
CG10077	-0.0861196	1.35664	-1.05059	-0.219935
CG10082	-1.2935	1.14706	0.0869739	0.0594717
CG10086	-0.5	-0.5	1.5	-0.5
CG10096	-0.5	-0.5	-0.5	1.5
CG10098	-1.44588	0.769339	0.548869	0.127669
CG10103	-0.251505	-1.29213	0.577228	0.966409
CG10126	-0.4921	0.000847755	-0.902671	1.39392
CG10132	-0.5	1.5	-0.5	-0.5
CG10137	-0.556952	1.49483	-0.556952	-0.380922
CG10139	-1.31716	-0.217566	0.625833	0.908893
CG10147	-0.865735	1.4321	-0.143168	-0.423196
CG10165	-1.13923	-0.53933	0.87467	0.803887
CG10166	-1.35345	0.930452	0.537818	-0.11482
CG10171	0.49345	1.14838	-1.03297	-0.60886
CG10184	-0.859743	-0.63051	1.35867	0.131583
CG10188	1.49726	-0.516919	-0.417872	-0.562474
CG10189	-1.43035	0.842132	0.483742	0.104472
CG10194	0.62946	1.01368	-0.485197	-1.15794
CG10195	-0.955381	-0.600335	1.28615	0.269567
CG10208	-0.886745	1.40045	-0.0114237	-0.502283
CG10209	1.00617	-1.02468	-0.675395	0.6939
CG10214	-0.394552	-0.536348	1.49583	-0.564931
CG10222	-0.697818	-0.697818	-0.0275101	1.42315
CG10232	-1.29854	-0.185329	0.443188	1.04068
CG1024	-0.880115	1.4077	-0.492483	-0.0351041
CG10252	-0.5	-0.5	-0.5	1.5
CG10254	-1.27787	1.04592	0.466837	-0.234887
CG10265	-1.2201	0.281355	1.1735	-0.234757
CG10268	-0.659143	0.55476	-1.00902	1.1134
CG10274	-0.78941	1.46412	-0.390124	-0.284586
CG10283	-0.53247	-0.53247	-0.433423	1.49836
CG10286	-1.10323	0.741439	-0.583205	0.944998
CG10311	-0.817272	-0.817272	0.412141	1.2224
CG10321	-1.0384	1.36348	-0.23259	-0.0924898
CG10324	-1.23568	0.978954	-0.362439	0.61917
CG10333	0.356809	-1.24521	1.12519	-0.23679
CG10336	0.831478	0.682189	-0.166211	-1.34746
CG10337	-1.32484	1.0899	0.238545	-0.00360953
CG10338	1.40242	-0.246588	-0.187758	-0.968072
CG10340	-1.11056	-0.270856	1.29863	0.0827907
CG10341	1.28878	0.293136	-0.821559	-0.760361
CG10343	-0.945235	-0.410957	-0.0353524	1.39154
CG10344	-1.42489	0.520202	0.0716576	0.833031
CG10347	1.43997	-0.789261	-0.539648	-0.111061
CG10353	1.08911	0.527302	-1.14689	-0.469521
CG10359	-0.865808	-0.865808	0.838368	0.893248
CG10365	0.528833	1.14713	-0.840558	-0.835402
CG10366	-1.05119	1.26931	0.251538	-0.469659
CG10375	-1.24165	-0.116081	1.19029	0.167445
CG10376	-1.27395	-0.146437	1.12664	0.29375
CG10383	-1.13121	-0.00227675	1.3009	-0.16741
CG10395	-1.38738	-0.0246579	0.508961	0.903072
CG10405	0	0	0	0
CG10407	-0.933803	1.30276	0.241401	-0.610363
CG10413	1.38539	0.0794023	-0.704247	-0.760545
CG10417	1.48478	-0.414535	-0.694617	-0.375628
CG10418	-1.24349	0.00113107	1.20514	0.037219
CG10425	-1.41642	0.937041	0.259965	0.219409
CG10428	-1.22999	1.13828	0.351833	-0.260124
CG10431	0.706613	1.01023	-0.801977	-0.914862
CG10433	-0.5	-0.5	-0.5	1.5
CG10435	-1.4737	0.412685	0.312548	0.748469
CG10444	-0.605876	-0.650866	-0.214122	1.47086
CG10445	1.49955	-0.517188	-0.517188	-0.465174
CG10462	-0.850569	0.620208	-0.850569	1.08093
CG10463	1.4859	-0.38999	-0.688496	-0.407413
CG10465	-0.565867	0.895545	-1.11968	0.790003
CG10466	-1.27464	-0.196824	1.09207	0.379397
CG10467	-1.40596	0.342437	0.944366	0.119154
CG10469	1.02335	0.686464	-0.954383	-0.755431
CG10470	0.284876	-0.868951	1.29034	-0.706261
CG10472	-0.5	1.5	-0.5	-0.5
CG10492	1.49064	-0.392468	-0.651519	-0.44665
CG10494	-0.644995	1.41815	-0.0164698	-0.756682
CG10495	-0.810274	1.24261	-0.810274	0.377942
CG10505	-0.5	-0.5	-0.5	1.5
CG10508	1.23647	0.388419	-0.821316	-0.803568
CG10512	-0.530531	1.48947	-0.621318	-0.337619
CG10516	0.956208	-0.720633	-0.994887	0.759312
CG10527	-0.609693	-1.08811	0.887854	0.809946
CG10543	1.49773	-0.457485	-0.46332	-0.576927
CG10550	0	0	0	0
CG10555	1.45023	-0.131328	-0.729535	-0.589369
CG10561	-0.799431	-0.799431	0.328453	1.27041
CG10565	0.565467	1.01101	-0.332451	-1.24402
CG10576	1.39116	-0.0984124	-0.315158	-0.977586
CG10581	1.44883	-0.775226	-0.14571	-0.527897
CG10584	-0.876319	-0.68394	0.257114	1.30314
CG10589	-0.5	-0.5	-0.5	1.5
CG10600	0.326782	-0.160731	-1.27751	1.11146
CG10616	0.856191	-1.34227	0.659643	-0.173566
CG10621	-0.5	-0.5	-0.5	1.5
CG10623	-0.5	-0.5	-0.5	1.5
CG10628	-1.03439	1.26775	0.267777	-0.501141
CG10631	-0.81505	1.3089	0.253337	-0.747188
CG10638	-0.0392136	1.3682	-0.315656	-1.01333
CG10646	1.34466	-0.401808	-1.0127	0.069842
CG10654	-0.5	-0.5	-0.5	1.5
CG10660	-0.824135	0.113479	-0.658429	1.36909
CG10663	-0.785754	-0.785754	0.270798	1.30071
CG10669	-0.782785	-0.782785	1.30671	0.258862
CG10672	-1.2659	1.05866	-0.25364	0.460872
CG10674	1.12465	0.138539	0.0459458	-1.30914
CG10681	-1.4749	0.234696	0.636257	0.60395
CG10702	-0.5	1.5	-0.5	-0.5
CG10731	1.28976	-0.508207	-1.0124	0.230851
CG10734	-0.5	-0.5	-0.5	1.5
CG10737	-0.879718	1.34889	0.150454	-0.619631
CG1074	-1.12674	-0.108809	-0.0733561	1.30891
CG10747	1.48306	-0.362596	-0.704017	-0.416444
CG10764	-1.13858	1.27356	0.122982	-0.25796
CG1077	-0.824806	-0.824806	0.451454	1.19816
CG10778	1.45748	-0.792799	-0.217625	-0.447056
CG10795	0.483171	-0.403789	-1.17994	1.10056
CG10799	-0.5	-0.5	-0.5	1.5
CG10801	-0.5	-0.5	1.5	-0.5
CG10802	-1.34393	1.06047	0.0211159	0.262339
CG10803	1.16512	0.369051	-1.17296	-0.361214
CG10809	0.518719	-1.49276	0.605826	0.368213
CG10841	-0.5	-0.5	-0.5	1.5
CG10859	1.347	0.173251	-0.760125	-0.760125
CG10863	0.712256	-1.48155	0.414741	0.354548
CG10866	-0.86485	0.92865	-0.86485	0.801049
CG10874	-0.705046	-0.72495	0.0240144	1.40598
CG10877	0.694163	1.02228	-0.858221	-0.858221
CG10889	-1.11581	0.138701	-0.304648	1.28176
CG10898	-0.706501	-0.526632	-0.238771	1.4719
CG1090	0	0	0	0
CG10903	0.324307	-1.02934	-0.538197	1.24323
CG10904	1.45314	-0.830091	-0.362724	-0.260324
CG10907	-0.812993	-0.782108	1.27461	0.320489
CG10914	-0.631345	-0.206991	-0.631345	1.46968
CG10916	-0.861099	1.14459	-0.815631	0.532144
CG1092	1.10358	0.584748	-0.930603	-0.757728
CG10927	1.48635	-0.590632	-0.590632	-0.305084
CG10932	1.34135	-0.319521	0.0260216	-1.04785
CG10947	-0.863055	-0.816679	0.542026	1.13771
CG10948	-1.01208	-0.602088	0.413117	1.20105
CG10949	-1.26262	-0.335485	0.889268	0.708835
CG10958	-0.786186	1.29982	-0.786186	0.272547
CG10959	-0.830359	-0.830359	1.17822	0.482495
CG10960	-1.00074	-0.67818	1.09364	0.58528
CG10962	0.914191	0.816481	-0.865336	-0.865336
CG10970	-0.529906	1.49862	-0.438804	-0.529906
CG10973	1.26896	-1.15249	0.107185	-0.22366
CG10979	1.40938	-0.0408248	-0.878591	-0.489963
CG10984	1.33897	0.0260802	-1.05319	-0.311867
CG11000	-1.08426	1.33548	-0.0573652	-0.19385
CG11007	0.44682	-0.0539105	-1.3627	0.969791
CG1103	-1.37942	0.868429	-0.0704354	0.58143
CG11030	0.98504	-0.227963	0.541012	-1.29809
CG11034	-0.852536	-0.852536	0.637213	1.06786
CG11035	-1.24984	0.653345	-0.347165	0.943665
CG1105	-1.14778	-0.30115	0.203776	1.24515
CG11050	0.350061	-1.17939	1.17051	-0.341181
CG11052	0	0	0	0
CG11070	-0.861893	0.886212	-0.86991	0.845591
CG11076	0.929705	0.123232	-1.41138	0.35844
CG11077	-0.928487	1.29629	-0.625431	0.257624
CG11089	0.995266	-0.0332331	0.39807	-1.3601
CG11095	1.46164	-0.267818	-0.397832	-0.795993
CG11103	-1.37818	0.994526	0.329544	0.0541135
CG11106	-0.5	-0.5	-0.5	1.5
CG11109	1.4455	-0.337969	-0.251271	-0.856257
CG11110	-0.307028	-1.25955	0.997968	0.568612
CG11122	1.49143	-0.420328	-0.422996	-0.648105
CG11123	1.42604	-0.0461845	-0.768324	-0.611528
CG11125	1.49999	-0.502712	-0.502712	-0.494564
CG11127	0.927923	0.781488	-1.038	-0.671411
CG11134	-1.49955	0.527837	0.468029	0.503681
CG11137	-1.42028	0.576633	0.805503	0.0381463
CG11141	1.46105	-0.183849	-0.727821	-0.549378
CG11151	-0.148857	1.35573	-1.05707	-0.149808
CG11155	-0.865168	0.810685	-0.865168	0.919652
CG11158	-0.881283	1.31902	0.221422	-0.659161
CG1116	-1.37029	0.704828	0.782232	-0.11677
CG11164	1.17696	-0.941466	0.474152	-0.709643
CG11168	-1.45013	0.713056	0.610454	0.126616
CG11170	-0.708893	0.8062	-1.00854	0.911237
CG11178	0.127645	-1.28919	0.0119616	1.14959
CG11180	-1.20354	0.676407	0.95459	-0.427454
CG11200	-1.38195	-0.0334276	0.498595	0.916785
CG11236	-0.5	-0.5	-0.5	1.5
CG11241	-0.5	-0.5	-0.5	1.5
CG11247	-0.879767	-0.639137	0.183267	1.33564
CG11248	-0.885429	1.40417	-0.49364	-0.0251057
CG11249	-0.5	1.5	-0.5	-0.5
CG11257	1.425	-0.516949	-0.834732	-0.0733139
CG11267	0.486513	0.141481	0.814298	-1.44229
CG11279	-0.184919	1.4384	-0.39096	-0.862525
CG1129	-1.03577	-0.461786	1.29311	0.20444
CG11307	-1.21745	1.21942	0.123152	-0.125117
CG11309	1.18628	0.467892	-0.77376	-0.880409
CG11313	-0.5	-0.5	-0.5	1.5
CG11318	0	0	0	0
CG11334	-1.33682	0.914361	-0.167986	0.590449
CG11342	-0.919527	1.0728	0.627573	-0.780847
CG11350	-0.5	-0.5	-0.5	1.5
CG11353	-0.715819	-0.715819	1.40517	0.0264681
CG11357	-1.48985	0.635762	0.351502	0.502588
CG1136	-0.5	-0.5	-0.5	1.5
CG11360	-0.21344	1.45632	-0.446489	-0.796388
CG11362	-0.5	-0.5	-0.5	1.5
CG11367	-0.5	-0.5	-0.5	1.5
CG11374	-0.5	-0.5	-0.5	1.5
CG11377	-1.39913	0.118417	0.963084	0.317627
CG11378	0	0	0	0
CG11396	-1.20864	-0.388052	0.559703	1.03699
CG11398	-1.1178	1.21845	-0.411458	0.310809
CG11399	-0.833309	1.16676	-0.833309	0.499854
CG11400	-0.57648	-0.415101	-0.505145	1.49673
CG11403	1.4782	-0.277893	-0.693208	-0.507103
CG11406	-0.5	1.5	-0.5	-0.5
CG11413	-0.5	-0.5	-0.5	1.5
CG11414	-1.06194	0.160411	-0.397821	1.29935
CG11417	-1.12692	-0.447658	1.16808	0.406502
CG1142	0.897133	0.803128	-1.07893	-0.621334
CG11426	-0.854076	-0.854076	0.651323	1.05683
CG1143	-0.784776	1.30271	-0.784776	0.266846
CG11436	-1.06009	1.30585	-0.388176	0.142412
CG11444	-1.18082	-0.357642	1.15286	0.385604
CG11447	-0.970833	-0.345766	1.39015	-0.0735523
CG11454	-1.08751	-0.233476	-0.00669786	1.32769
CG11456	-0.830343	-0.830343	1.17828	0.482404
CG1146	1.49765	-0.429779	-0.500948	-0.566919
CG11474	-1.37312	-0.051999	0.493043	0.932072
CG11475	-0.5	-0.5	-0.5	1.5
CG11486	-1.46427	0.355683	0.314602	0.793989
CG11504	0.68287	0.760155	-1.39779	-0.0452388
CG11523	-1.44932	0.121682	0.622917	0.704723
CG11537	-0.659711	-0.885079	0.230072	1.31472
CG11539	1.2646	-0.993084	0.298816	-0.570332
CG11555	0.480867	-1.47183	0.731567	0.259398
CG11560	-1.47461	0.605402	0.233021	0.636182
CG11562	0.349346	-0.656725	1.249	-0.941625
CG11563	-0.40939	1.48362	-0.372371	-0.701861
CG11583	0.514484	0.801545	-1.44123	0.125205
CG11586	1.0426	0.662328	-0.750176	-0.95475
CG11590	1.22294	-0.411006	-1.11515	0.30322
CG11593	-1.2818	-0.285644	0.630489	0.936954
CG11594	1.26329	0.341167	-0.818903	-0.785556
CG11596	-1.14691	-0.483301	0.5679	1.06231
CG11597	0	0	0	0
CG11601	0.423658	-1.27692	1.06927	-0.216004
CG1161	-0.666902	0.707436	-1.03367	0.993132
CG11619	-0.564431	1.49332	-0.564431	-0.364458
CG11638	-0.77172	-0.77172	0.215937	1.3275
CG11655	1.46552	-0.201186	-0.711191	-0.553147
CG11658	-0.5	-0.5	-0.5	1.5
CG11679	-0.942608	0.329536	-0.646083	1.25916
CG11686	-1.16532	-0.422525	0.47543	1.11242
CG11695	-0.734616	0.399646	-0.891883	1.22685
CG11696	-0.981227	1.09066	-0.703433	0.593997
CG11699	1.45992	-0.162069	-0.658349	-0.639497
CG11700	-0.5	-0.5	-0.5	1.5
CG11710	1.40072	0.0171426	-0.581436	-0.836429
CG1172	0.331296	-1.43197	0.208319	0.892357
CG11722	0.250806	-1.38198	1.00573	0.125441
CG11723	1.36438	-1.00143	-0.368212	0.00527192
CG11737	1.20286	0.0586356	-1.24475	-0.0167432
CG11752	1.2964	0.209477	-1.01904	-0.486841
CG11753	-0.957333	0.58612	-0.728472	1.09968
CG11755	-0.645053	1.47064	-0.613198	-0.21239
CG11771	1.40958	-0.0262309	-0.858372	-0.524975
CG11777	1.30691	-0.924905	0.235352	-0.617362
CG11779	-1.21505	-0.272226	0.329188	1.15809
CG11781	0.815186	0.749477	-1.30658	-0.258084
CG11786	-0.5	-0.5	1.5	-0.5
CG11788	-0.686702	1.43295	-0.686702	-0.0595418
CG11790	0.628673	0.803593	-0.0330099	-1.39926
CG11791	-1.03251	-0.632562	1.10415	0.560923
CG11807	-0.680532	0.0944862	-0.792386	1.37843
CG11808	1.42303	-0.139812	-0.898619	-0.3846
CG11811	0.147421	-1.35356	1.06065	0.145482
CG11825	0	0	0	0
CG11836	0	0	0	0
CG11837	-1.11689	1.28684	-0.287654	0.117701
CG11839	0.292518	-1.283	1.11886	-0.128377
CG11857	-0.533557	-1.1438	0.826963	0.850394
CG11858	-0.144226	1.45506	-0.69318	-0.617655
CG11873	0.424784	1.21172	-0.896404	-0.740101
CG11882	1.44049	-0.649584	-0.70389	-0.0870142
CG11883	0	0	0	0
CG11885	0.431418	1.13723	-1.16528	-0.403363
CG11893	-0.5	-0.5	-0.5	1.5
CG11899	1.35917	-0.186594	-1.05017	-0.122399
CG11902	-1.49227	0.629451	0.382917	0.4799
CG11906	-1.11118	-0.138198	-0.0701915	1.31957
CG11911	-0.624644	1.47296	-0.624644	-0.223673
CG11920	1.48552	-0.443874	-0.684654	-0.356994
CG11927	1.38024	0.043999	-0.910575	-0.513665
CG11961	-1.08276	1.16357	0.444603	-0.525417
CG11964	0.00822466	1.15219	-1.287	0.126593
CG11970	-0.716387	1.40456	-0.716387	0.0282157
CG11975	-0.129823	-1.35687	0.607489	0.879206
CG11980	-0.489747	-0.0535938	1.41396	-0.870623
CG11983	-0.5	1.5	-0.5	-0.5
CG11986	-0.677041	-0.677041	1.44074	-0.0866545
CG11999	-0.329121	-0.941885	1.40907	-0.138062
CG12004	-0.511039	1.42196	-0.0668785	-0.84404
CG12007	-1.39542	0.0282417	0.441304	0.925877
CG12010	-0.93898	0.0930873	1.35886	-0.512972
CG12012	-0.350499	-0.92251	-0.143191	1.4162
CG12024	-0.804088	-0.192173	-0.455872	1.45213
CG12025	-0.549761	-0.788601	-0.0990194	1.43738
CG12054	-0.548613	1.39378	0.0242034	-0.869373
CG12056	-0.698208	1.42278	-0.698208	-0.0263688
CG12065	0.94789	0.773854	-0.961997	-0.759748
CG12071	1.49602	-0.431838	-0.464305	-0.599879
CG12075	-0.5	-0.5	-0.5	1.5
CG1208	-0.864536	-0.827323	0.584283	1.10758
CG12081	-1.06769	0.892286	-0.636347	0.811748
CG12084	-1.12279	1.08777	-0.509498	0.544522
CG12091	-1.16271	0.72147	-0.497097	0.938338
CG12093	-0.440558	1.39226	-0.931183	-0.0205175
CG12096	-0.429253	-1.15844	1.12048	0.467215
CG12099	0.197074	1.33197	-0.859435	-0.669612
CG12104	1.36992	-0.573305	-0.886843	0.0902252
CG12105	-0.5	-0.5	-0.5	1.5
CG12106	-0.701005	-0.701005	-0.0181487	1.42016
CG12107	-1.25062	0.770869	-0.362883	0.842633
CG12112	-0.760086	-0.963303	0.929809	0.793581
CG12116	-0.550682	1.49593	-0.550682	-0.394569
CG12118	-0.863773	-0.863773	0.952051	0.775495
CG12121	1.38276	-0.999375	-0.280421	-0.102959
CG12123	-1.49627	0.539216	0.399594	0.557457
CG12128	1.39785	-0.112527	-0.964641	-0.320677
CG12129	-1.17235	-0.436432	1.06993	0.538857
CG1213	-0.689308	-0.689308	-0.0521167	1.43073
CG12133	-1.10056	-0.405382	1.2482	0.257744
CG12134	1.46544	-0.427017	-0.263285	-0.775135
CG12155	0.937196	-1.39078	0.432382	0.0211991
CG12159	-0.870881	1.39709	-0.538104	0.0118924
CG12163	-1.28595	-0.127534	1.11362	0.299868
CG12170	-1.31138	-0.153287	1.03578	0.428883
CG12171	0.0317531	1.4033	-0.713028	-0.722028
CG12173	-0.737649	-0.833089	0.27145	1.29929
CG12177	-0.599154	1.49582	-0.42054	-0.476122
CG12179	-0.847824	1.0976	-0.847824	0.598043
CG1218	1.41981	-0.887938	-0.101217	-0.430654
CG12182	-0.5	-0.5	-0.5	1.5
CG12184	-0.5	1.5	-0.5	-0.5
CG12204	0.906372	0.80549	-1.03543	-0.676433
CG12209	-0.5	-0.5	-0.5	1.5
CG12213	1.36192	0.137726	-0.720473	-0.779176
CG12219	-0.784302	1.30367	-0.784302	0.264938
CG12224	-0.780056	-0.780056	0.248055	1.31206
CG12236	-0.936109	-0.51036	0.0840578	1.36241
CG12237	1.38018	-0.66061	0.0873163	-0.806888
CG12241	-1.15618	1.28417	-0.00943879	-0.118553
CG12253	-0.825652	-0.825652	1.19524	0.456058
CG12259	-1.35069	-0.160803	0.694694	0.816804
CG12267	-0.849352	-0.849352	1.08852	0.610179
CG1227	-0.956784	-0.747689	1.04317	0.661302
CG12279	-1.43174	0.492704	0.834521	0.10452
CG12288	-0.858261	-0.858261	1.02189	0.69463
CG12290	-0.540985	1.49901	-0.452738	-0.505292
CG12299	1.49939	-0.519959	-0.519959	-0.459472
CG12301	-1.07475	1.13745	-0.55536	0.492659
CG12316	1.47812	-0.342829	-0.730707	-0.404586
CG12320	-1.20517	1.11557	0.43149	-0.341882
CG12321	-0.375138	1.46354	-0.294194	-0.794209
CG12325	-1.48144	0.679793	0.505484	0.296161
CG1233	0.862192	0.869583	-0.887445	-0.84433
CG12333	-0.632675	-1.02048	1.13631	0.516845
CG12338	-0.506438	-0.76742	-0.182592	1.45645
CG1234	1.27148	0.216482	-1.0827	-0.405268
CG12341	-0.855017	-0.855017	1.04967	0.660359
CG12343	-1.39105	0.269468	0.987045	0.134539
CG12344	-0.5	1.5	-0.5	-0.5
CG1236	-0.426395	-0.260261	1.46464	-0.77799
CG12375	0.602904	1.09112	-0.772465	-0.921556
CG12379	-0.61786	-0.61786	-0.240335	1.47605
CG12384	0.616518	-1.46611	0.190802	0.658794
CG1239	-0.761979	-0.761979	1.34402	0.179933
CG12391	0.93146	-1.06198	0.770973	-0.640454
CG12446	0	0	0	0
CG1246	-0.643455	1.46317	-0.643455	-0.17626
CG12470	-0.748688	-0.748688	0.133112	1.36426
CG12493	-0.5	-0.5	-0.5	1.5
CG12499	0.998744	0.712491	-0.979523	-0.731712
CG12512	-0.581383	1.48912	-0.581383	-0.326354
CG12519	1.35978	-0.751773	-0.751773	0.143764
CG12535	1.13313	0.52645	-0.654085	-1.0055
CG12541	-0.633988	-0.633988	1.46833	-0.200349
CG12547	-1.25281	0.0128179	0.0448782	1.19511
CG12560	-0.5	-0.5	-0.5	1.5
CG12567	-0.277374	1.42865	-0.906772	-0.244506
CG12576	-0.243513	1.23563	-1.17494	0.182824
CG12592	1.26369	0.340681	-0.802188	-0.802188
CG12605	0	0	0	0
CG12608	0.58769	-1.42537	0.787672	0.0500136
CG12643	1.11449	0.574285	-0.876997	-0.811778
CG1265	-0.114624	-1.19114	0.0547424	1.25102
CG12655	-0.790503	-0.790503	0.290293	1.29071
CG12659	-0.818718	1.31529	-0.736356	0.239785
CG12674	0	0	0	0
CG12699	-0.5	-0.5	-0.5	1.5
CG12702	1.44103	-0.0890658	-0.647706	-0.704257
CG1271	0.898463	0.828643	-0.949189	-0.777917
CG12713	1.47903	-0.273326	-0.676696	-0.529007
CG12717	-0.5	-0.5	-0.5	1.5
CG12725	-0.5	-0.5	-0.5	1.5
CG12728	0.499533	0.166795	-1.45134	0.785016
CG12730	0.66959	0.975037	-1.17484	-0.469785
CG12744	-1.08044	1.11008	0.532868	-0.562509
CG12746	-0.58641	1.48694	-0.591046	-0.309488
CG1275	0.985536	0.698081	-1.09093	-0.592692
CG12766	-0.5	-0.5	-0.5	1.5
CG12768	-0.5	-0.5	-0.5	1.5
CG12773	-1.38371	0.800848	0.661655	-0.0787947
CG12795	1.38638	-0.417391	-0.0185288	-0.950464
CG12811	0.657633	0.601217	0.21132	-1.47017
CG12818	0.775104	-1.37308	0.708296	-0.110317
CG12822	1.4493	-0.803254	-0.172003	-0.474046
CG12824	1.5	-0.5	-0.5	-0.5
CG12825	-0.5	-0.5	-0.5	1.5
CG12836	0	0	0	0
CG12848	1.35938	0.060609	-0.974784	-0.445205
CG12853	-0.5	-0.5	-0.5	1.5
CG12860	-0.5	-0.5	-0.5	1.5
CG12861	-0.647692	1.46071	-0.647692	-0.165322
CG12863	-0.865734	-0.865734	0.897521	0.833946
CG12868	-1.28397	-0.167122	0.357678	1.09341
CG12869	-0.5	-0.5	-0.5	1.5
CG12877	1.38126	-0.997203	-0.0825551	-0.301499
CG12880	-0.564755	1.49325	-0.564755	-0.363741
CG12883	-0.902698	-0.536437	1.376	0.0631308
CG12895	-1.29538	0.0508889	1.14427	0.10022
CG12896	-0.437378	1.14354	-1.14418	0.438014
CG12909	1.43304	-0.0627799	-0.642468	-0.727794
CG12910	-0.512994	-0.512994	-0.473755	1.49974
CG12913	-0.5	1.5	-0.5	-0.5
CG12920	-0.5	1.5	-0.5	-0.5
CG12926	-0.5	1.5	-0.5	-0.5
CG12929	-1.20613	0.19665	1.2108	-0.201325
CG12934	-0.209079	1.46816	-0.693353	-0.56573
CG12935	-0.896834	-0.532439	1.38201	0.0472583
CG12942	-1.30368	0.730514	0.835446	-0.262278
CG12945	1.45077	-0.839025	-0.351612	-0.260134
CG12947	-1.04104	-0.669976	0.813261	0.897758
CG12948	-1.32825	0.186759	0.0466419	1.09485
CG12963	-0.5	-0.5	1.5	-0.5
CG12971	-0.5708	-0.5708	1.49187	-0.350272
CG12974	-0.630464	-0.630464	1.47012	-0.209197
CG12975	-1.46016	0.788763	0.234674	0.43672
CG12990	0	0	0	0
CG12991	-0.902624	-0.765468	0.511506	1.15659
CG12992	-0.570929	-0.570929	1.49184	-0.349983
CG13001	-1.12027	0.0242281	1.30424	-0.208198
CG13004	-0.5	-0.5	-0.5	1.5
CG13005	-0.864186	0.943967	-0.864186	0.784405
CG13010	0	0	0	0
CG13012	-0.5	-0.5	-0.5	1.5
CG13014	0.396801	0.643043	0.45178	-1.49162
CG13016	1.41792	-0.779301	-0.0207443	-0.617873
CG13018	-0.226888	-1.24966	1.12348	0.353069
CG13025	-0.894238	1.09285	0.602934	-0.801549
CG1307	-1.37571	0.904474	0.534209	-0.0629713
CG13074	1.48734	-0.312447	-0.587448	-0.587448
CG13077	-0.5	1.5	-0.5	-0.5
CG13085	-0.5	-0.5	-0.5	1.5
CG13086	1.18017	0.406724	-1.09566	-0.491229
CG13088	0.572975	-0.844478	-0.844478	1.11598
CG1309	-1.43229	0.0820114	0.552249	0.798028
CG13096	0.792591	0.251497	0.416969	-1.46106
CG13097	-1.22688	0.731917	0.894233	-0.399274
CG13102	0	0	0	0
CG13116	-0.700017	-0.700017	-0.0210603	1.42109
CG13117	-0.70183	-0.981012	0.587381	1.09546
CG13123	-0.795141	1.45035	-0.485073	-0.170134
CG13124	-1.22427	-0.280107	0.370657	1.13372
CG13126	-0.784389	1.45175	-0.49872	-0.16864
CG13127	0	0	0	0
CG13144	-0.5	1.5	-0.5	-0.5
CG13151	1.49735	-0.568	-0.423098	-0.506255
CG13155	0	0	0	0
CG13159	0	0	0	0
CG1316	0.71178	-1.47047	0.232264	0.52643
CG13160	-0.5	-0.5	1.5	-0.5
CG13168	-0.5	-0.5	-0.5	1.5
CG1317	-0.0578989	0.656343	0.793205	-1.39165
CG13185	1.00396	0.711446	-0.772213	-0.943188
CG13192	-1.10229	-0.480464	0.403068	1.17968
CG13197	0.483585	-1.40693	0.886182	0.0371608
CG13204	0	0	0	0
CG13220	-1.39065	0.399306	0.951332	0.0400165
CG13229	-0.5	-0.5	-0.5	1.5
CG1324	-0.5	-0.5	-0.5	1.5
CG13244	0	0	0	0
CG13248	-0.5	-0.5	-0.5	1.5
CG13252	-0.5	-0.5	-0.5	1.5
CG13255	-0.5	-0.5	-0.5	1.5
CG13295	-0.809057	-0.809057	0.37219	1.24592
CG13314	-0.5	-0.5	-0.5	1.5
CG13315	-1.14797	-0.458723	1.10418	0.50252
CG13319	0.318061	-0.95875	1.26226	-0.621567
CG13321	-0.5	-0.5	1.5	-0.5
CG13339	-1.06482	-0.607281	1.059	0.613093
CG13344	-0.645902	-0.645902	-0.169953	1.46176
CG13358	-0.5	-0.5	-0.5	1.5
CG13360	0	0	0	0
CG13364	-1.25087	-0.293148	1.05255	0.491463
CG13365	-0.599797	-1.063	1.08421	0.578584
CG13366	1.20177	-0.555713	0.39747	-1.04353
CG13367	1.40293	-0.725838	-0.709837	0.0327428
CG13369	1.25302	-0.00446157	-1.19458	-0.053974
CG13373	-1.10792	0.0676186	-0.263059	1.30336
CG13375	-0.701679	-0.701679	1.41952	-0.0161603
CG13377	1.31269	0.244392	-0.729145	-0.827934
CG13384	-0.213195	0.987117	0.529737	-1.30366
CG13390	-1.31046	0.660273	0.888728	-0.238544
CG13392	-1.04257	-0.42826	0.166213	1.30461
CG13397	-0.507053	1.49992	-0.507053	-0.485819
CG13398	-1.29585	-0.280099	0.772325	0.803629
CG13405	-0.5	-0.5	-0.5	1.5
CG13409	0	0	0	0
CG13436	-0.5	-0.5	-0.5	1.5
CG1344	1.43514	-0.0939544	-0.54377	-0.797413
CG13482	-0.806981	-0.806981	1.25146	0.362501
CG13484	-0.831054	-0.678845	1.35019	0.15971
CG13488	0	0	0	0
CG13506	-0.66459	-0.66459	-0.120675	1.44985
CG13516	-0.5	-0.5	-0.5	1.5
CG13531	-0.576507	1.42588	-0.794683	-0.0546885
CG1354	-0.533642	1.30833	0.205704	-0.980396
CG13551	-0.567187	-0.943288	1.32433	0.186142
CG13559	1.14795	-0.632122	0.500238	-1.01607
CG13562	-0.570783	1.49188	-0.570783	-0.350311
CG13563	-0.559696	1.4943	-0.374907	-0.559696
CG1358	-0.5	-0.5	-0.5	1.5
CG13585	-1.19708	0.71186	-0.443879	0.9291
CG13599	-0.540388	1.49745	-0.540388	-0.416672
CG1360	-0.71059	-0.71059	0.0105018	1.41068
CG13601	0.965041	0.759947	-0.90362	-0.821369
CG13603	1.41961	-0.0174855	-0.727935	-0.674185
CG13604	-0.730177	1.46603	-0.521003	-0.214847
CG13605	1.08963	0.455429	-0.31884	-1.22622
CG13609	-1.05807	0.360982	1.21665	-0.519563
CG13623	-1.38898	-0.0626678	0.644749	0.806904
CG13625	1.01261	-0.559259	0.656237	-1.10959
CG13630	-0.533601	-0.741125	1.46002	-0.185298
CG13631	-1.47992	0.670552	0.276861	0.532502
CG13654	1.48439	-0.383869	-0.69803	-0.402487
CG13663	-0.972912	-0.67887	0.487966	1.16382
CG13667	-0.860616	-0.860616	0.723938	0.997294
CG13671	1.44498	-0.804693	-0.492672	-0.14761
CG13676	-0.665479	1.44924	-0.665479	-0.118278
CG13689	-1.4988	0.472919	0.556153	0.469727
CG13690	-1.26347	0.611677	0.965068	-0.313276
CG13692	0	0	0	0
CG13707	-0.863019	0.761058	-0.863019	0.96498
CG1371	0.212211	1.23621	-0.28959	-1.15883
CG13739	0	0	0	0
CG13741	0	0	0	0
CG13742	-1.05899	1.1632	0.457833	-0.562038
CG13743	-0.5	-0.5	-0.5	1.5
CG13751	1.2324	-0.778827	-0.847974	0.394399
CG13760	-0.803401	1.36107	-0.695092	0.137424
CG13766	-1.20341	1.19447	0.254457	-0.24552
CG13773	-1.23873	-0.248937	1.1292	0.358466
CG13775	-0.580867	1.48927	-0.580867	-0.327531
CG13784	-0.837703	-0.837703	0.527048	1.14836
CG13807	-0.761425	-0.345478	-0.365314	1.47222
CG13813	0	0	0	0
CG13827	1.24533	-1.02386	-0.544516	0.323054
CG13850	-1.15698	0.0643573	1.27444	-0.181816
CG13868	-0.992332	-0.729512	0.842039	0.879805
CG13876	-0.990192	0.0491476	-0.416699	1.35774
CG13877	-0.506092	1.49994	-0.506092	-0.487759
CG13887	-0.58882	-0.967299	0.274634	1.28148
CG13893	-0.788117	0.871465	-0.940548	0.857199
CG13895	-1.16921	0.89867	-0.492717	0.763259
CG13896	-1.20986	-0.430745	0.869732	0.770878
CG13898	0	0	0	0
CG13901	1.41123	-0.929319	-0.360699	-0.121211
CG13907	-0.685052	1.43211	-0.690315	-0.0567463
CG13917	0.950897	0.221759	-1.41066	0.238007
CG13919	-1.24834	0.66903	-0.353095	0.932403
CG13920	-0.693204	1.42733	-0.693204	-0.0409198
CG13921	-0.5	-0.5	-0.5	1.5
CG13926	-1.40945	-0.0136839	0.729175	0.693956
CG13928	0	0	0	0
CG13933	-0.658756	1.45379	-0.658756	-0.136279
CG13937	-0.636176	-1.06844	0.831783	0.872837
CG1394	0	0	0	0
CG13982	-0.508022	1.4999	-0.508022	-0.483859
CG13992	-0.5	-0.5	-0.5	1.5
CG13994	-0.045649	0.572892	-1.3885	0.861261
CG14005	-0.368702	1.4749	-0.749177	-0.357021
CG14024	0	0	0	0
CG14036	1.48046	-0.28807	-0.511465	-0.680925
CG14043	1.35084	-0.847966	-0.657475	0.154598
CG14050	0	0	0	0
CG14057	-1.46665	0.725507	0.215761	0.525381
CG1407	0.698125	-1.4406	0.0869345	0.655541
CG14072	-0.5	-0.5	-0.5	1.5
CG14073	-0.598092	-1.09629	0.797298	0.897081
CG14074	-0.713289	-0.713289	0.0187127	1.40787
CG14077	0	0	0	0
CG14079	-0.5	1.5	-0.5	-0.5
CG14100	1.47659	-0.624944	-0.60814	-0.243506
CG14102	-0.5	-0.5	-0.5	1.5
CG14104	1.06371	-1.02991	0.61841	-0.652208
CG14105	-1.1113	-0.379436	0.240441	1.25029
CG14109	-0.5	-0.5	-0.5	1.5
CG14113	0	0	0	0
CG14117	-0.864139	-0.864139	0.944941	0.783336
CG14130	0.982538	-1.39075	0.111613	0.296601
CG14135	-0.723574	-0.723574	0.0506092	1.39654
CG14142	-0.5	1.5	-0.5	-0.5
CG14154	0	0	0	0
CG1416	0.279198	-1.04031	1.26094	-0.499824
CG14174	-1.38519	0.998123	0.122494	0.264571
CG1418	0.131387	-1.3328	1.093	0.108413
CG14182	-1.09816	0.731259	-0.588556	0.955459
CG14183	-0.592893	-0.592893	1.48562	-0.299831
CG14184	-1.21471	-0.185975	0.195906	1.20478
CG14194	-1.22108	1.0058	-0.379259	0.594542
CG14200	-0.701762	1.48161	-0.454322	-0.325523
CG14207	1.4387	-0.148729	-0.839927	-0.450046
CG14210	-1.46423	0.221082	0.752836	0.490308
CG14220	-1.40116	0.964875	0.290956	0.145325
CG14221	0	0	0	0
CG14223	0	0	0	0
CG14229	0.381009	-0.687497	-0.927314	1.2338
CG14230	-1.14443	0.966341	-0.519483	0.69757
CG14231	-0.605387	1.4263	-0.0483612	-0.772552
CG14232	-0.948134	0.170357	-0.551737	1.32951
CG14252	-0.647891	-0.647891	-0.164804	1.46059
CG14253	-0.848984	-0.86849	0.700477	1.017
CG14257	-0.771092	-0.771092	1.32862	0.213566
CG14260	-0.5	1.5	-0.5	-0.5
CG14270	-0.896179	0.262811	1.29832	-0.664952
CG14273	-0.842095	-0.842095	0.556175	1.12802
CG14285	-0.5	1.5	-0.5	-0.5
CG14286	-1.06165	-0.23166	1.34769	-0.0543806
CG14292	-0.762841	-0.762841	0.183058	1.34262
CG14297	-0.5	-0.5	-0.5	1.5
CG14302	-0.5	-0.5	-0.5	1.5
CG14312	0	0	0	0
CG14322	-0.96865	1.40208	-0.248062	-0.185366
CG14325	0	0	0	0
CG1434	-1.4871	0.497406	0.334564	0.655129
CG14341	-1.35406	-0.0527237	0.998546	0.408234
CG14352	-0.755261	-0.755261	0.155959	1.35456
CG14367	0	0	0	0
CG1440	1.2057	0.333763	-1.12322	-0.416242
CG14401	-0.834056	-0.834056	1.16375	0.50436
CG14407	-0.894162	-0.810048	0.637474	1.06674
CG14408	-1.36908	0.321089	1.01051	0.0374767
CG14411	-0.411897	-0.14708	-0.872136	1.43111
CG14414	0.820512	-1.19169	0.832793	-0.461613
CG14431	-0.5	-0.5	1.5	-0.5
CG14434	-0.369108	1.13263	0.421174	-1.1847
CG14435	0.894645	-0.118728	-1.35865	0.582734
CG14440	1.40563	-0.587561	-0.823975	0.00590354
CG14441	-0.5	-0.5	-0.5	1.5
CG14442	0.100033	-0.0271914	-1.25843	1.18559
CG14450	-1.29483	-0.278387	0.721702	0.851511
CG14459	-0.5	-0.5	-0.5	1.5
CG14464	-0.786394	-0.88938	1.14324	0.532535
CG14478	-0.34302	0.483312	-1.21882	1.07853
CG14480	-1.17537	-0.456731	1.01355	0.618558
CG14483	0.529421	-1.04964	-0.6009	1.12111
CG14490	-0.5	-0.5	-0.5	1.5
CG14502	-0.5	-0.5	-0.5	1.5
CG14511	-1.19097	0.0235922	1.25438	-0.0870059
CG14512	-1.00766	-0.337479	1.36756	-0.022426
CG14516	0	0	0	0
CG14535	0	0	0	0
CG14543	0.204942	0.464708	0.787189	-1.45684
CG14544	-1.40177	0.680593	0.755427	-0.0342531
CG14556	-0.51697	1.49956	-0.51697	-0.46562
CG14561	-0.847328	-0.847328	1.10045	0.594204
CG14562	-0.708906	1.46866	-0.540948	-0.218803
CG14567	-0.5	1.5	-0.5	-0.5
CG14589	-0.5	-0.5	-0.5	1.5
CG14609	1.47933	-0.296546	-0.701282	-0.481503
CG14610	-1.0299	-0.681293	0.781213	0.929978
CG14613	1.28619	0.254363	-0.987476	-0.55308
CG14615	-0.38206	1.49423	-0.593809	-0.518361
CG14618	1.47288	-0.266542	-0.476788	-0.729552
CG14621	-0.486663	1.49522	-0.601445	-0.407112
CG14629	0.0477837	1.30086	-0.229325	-1.11932
CG1463	0.308871	1.28034	-0.758877	-0.830329
CG14641	-0.77079	-0.206133	1.4596	-0.482673
CG14642	-0.563961	1.49342	-0.563961	-0.3655
CG14645	-0.607944	1.48019	-0.607944	-0.264299
CG14646	0.724549	-1.18607	0.92422	-0.462701
CG14647	-1.1325	-0.473504	0.483939	1.12207
CG14650	-0.630502	1.47011	-0.630502	-0.209102
CG14655	-0.584725	1.48816	-0.584725	-0.318709
CG14657	1.39455	0.0274868	-0.563712	-0.858321
CG14667	-1.22014	-0.357772	1.05197	0.525948
CG14671	-1.21072	-0.245396	1.18293	0.273184
CG14683	-0.867206	-0.0840879	1.42127	-0.469976
CG14688	-0.572491	-0.572491	-0.34648	1.49146
CG14692	0	0	0	0
CG14695	1.0252	0.68698	-0.931012	-0.781173
CG14696	-0.104846	1.44551	-0.690749	-0.649911
CG14701	-1.02095	0.798248	-0.693533	0.916232
CG14710	-1.40811	0.0514134	0.895459	0.461237
CG14711	-0.970715	1.34387	-0.488329	0.115177
CG14712	1.4467	-0.195247	-0.83293	-0.418524
CG14715	1.20642	-0.243772	0.233436	-1.19609
CG14721	1.39976	-0.307135	-0.9643	-0.128324
CG14722	-1.20034	-0.271588	1.18437	0.287563
CG14740	-0.5	1.5	-0.5	-0.5
CG14757	-0.5	-0.5	-0.5	1.5
CG14762	-0.5	-0.5	1.5	-0.5
CG14764	-1.13331	0.691437	0.975886	-0.534011
CG14767	1.21877	0.353694	-1.06297	-0.509494
CG14777	-1.17636	0.126415	-0.199245	1.24919
CG14780	0	0	0	0
CG14785	-0.776343	1.3191	-0.776343	0.233588
CG14787	0	0	0	0
CG14803	0.827488	0.902981	-0.828965	-0.901503
CG14805	-1.26311	1.15271	-0.131515	0.24191
CG14806	0.142207	-1.43645	0.845664	0.448584
CG14812	-1.2306	-0.360592	0.583853	1.00733
CG14814	-0.702691	-0.90106	0.350042	1.25371
CG14817	-1.08675	0.170214	1.28591	-0.369369
CG14818	-1.44646	0.107851	0.679324	0.659281
CG14834	-0.5	1.5	-0.5	-0.5
CG14855	-0.5	1.5	-0.5	-0.5
CG1486	-0.552674	-1.11628	1.00147	0.667477
CG14860	0	0	0	0
CG14879	-1.17136	0.858355	-0.492398	0.805406
CG14881	-0.96016	1.30082	-0.575254	0.23459
CG14882	-0.627573	1.49324	-0.461981	-0.403685
CG14883	-1.35203	0.145566	0.143326	1.06314
CG14894	-1.2088	-0.349484	0.460899	1.09738
CG14903	-1.11472	-0.397664	0.278904	1.23348
CG14906	-1.2218	0.208461	1.19599	-0.182643
CG14907	-1.23552	0.155804	-0.118287	1.19801
CG1492	-0.853519	-0.853519	0.646126	1.06091
CG14937	-0.815784	1.22687	-0.815784	0.404696
CG1494	0	0	0	0
CG14957	-0.5	1.5	-0.5	-0.5
CG14961	-0.567905	1.49255	-0.567905	-0.356739
CG14963	0	0	0	0
CG14964	0	0	0	0
CG14965	-0.5	-0.5	-0.5	1.5
CG14966	-1.41595	0.872918	0.478476	0.0645537
CG14969	1.48912	-0.638267	-0.344271	-0.506579
CG14971	1.22732	0.231354	-0.295564	-1.16311
CG14977	-1.49921	0.474428	0.545641	0.479138
CG14984	-1.05004	-0.238009	-0.0670454	1.35509
CG14985	0.305204	-0.726174	-0.859775	1.28075
CG14990	-0.0814125	-1.36233	0.940064	0.503682
CG14995	-0.390358	-1.01137	0.051883	1.34984
CG14997	-1.14701	-0.425242	1.15188	0.420368
CG15011	1.1672	-1.16825	0.369866	-0.368812
CG15012	1.23814	-0.978374	-0.617764	0.357999
CG15014	-1.3581	0.394568	-0.0357636	0.999298
CG15019	-1.28922	0.800669	0.781628	-0.293075
CG15027	-1.03763	1.20904	-0.558389	0.386983
CG15034	0	0	0	0
CG15040	-0.5	-0.5	-0.5	1.5
CG15043	0	0	0	0
CG15073	-0.623524	-0.623524	-0.226438	1.47349
CG15083	0.837861	0.853915	-1.10834	-0.583434
CG15084	-0.73474	-0.73474	0.0864224	1.38306
CG15093	0.79597	0.924689	-0.735737	-0.984923
CG15097	-0.518573	-0.518573	1.49947	-0.462327
CG15098	1.15451	0.480697	-0.595029	-1.04018
CG15099	1.00805	0.707739	-0.932032	-0.783752
CG15107	0.685086	0.751466	-1.40169	-0.0348601
CG15109	-0.5	-0.5	-0.5	1.5
CG15111	0.300161	-0.900192	-0.679663	1.27969
CG15117	-0.855027	-0.855027	1.0496	0.660453
CG15118	0.942617	-1.09154	0.748598	-0.599671
CG15127	-0.0381351	-0.973525	1.38306	-0.371401
CG1513	0.00709027	-1.37586	0.976096	0.392675
CG15141	-1.13636	1.26546	-0.287009	0.157905
CG15143	-0.5	-0.5	-0.5	1.5
CG15144	0	0	0	0
CG15145	0	0	0	0
CG15160	-0.688287	1.48581	-0.416296	-0.381226
CG15168	-0.470467	1.41966	-0.870044	-0.0791447
CG15170	-0.5	1.5	-0.5	-0.5
CG15186	0	0	0	0
CG15196	-0.5	-0.5	-0.5	1.5
CG15200	-0.5	-0.5	-0.5	1.5
CG15201	-0.5	-0.5	-0.5	1.5
CG15202	0	0	0	0
CG15209	-0.621491	1.47443	-0.621491	-0.231443
CG15210	-0.884602	-0.843439	0.944726	0.783315
CG15211	0.949297	0.774731	-0.782996	-0.941033
CG15219	-0.5	-0.5	-0.5	1.5
CG1523	-0.798089	1.46331	-0.316757	-0.348469
CG15237	-0.472331	1.07486	0.547279	-1.14981
CG15247	-0.5	-0.5	-0.5	1.5
CG15278	0	0	0	0
CG1529	-1.32404	0.288694	-0.0425051	1.07785
CG15293	-0.602245	-0.602245	-0.27787	1.48236
CG15309	-0.862817	0.968148	-0.862817	0.757485
CG15312	-0.5	-0.5	-0.5	1.5
CG15317	-0.93145	-0.23641	1.41896	-0.251104
CG1532	-1.16878	-0.166064	0.0693224	1.26553
CG15322	-0.5	-0.5	-0.5	1.5
CG15332	-0.5	-0.5	-0.5	1.5
CG15333	0	0	0	0
CG15336	0	0	0	0
CG15343	-0.819907	1.21425	-0.819907	0.425565
CG15347	-0.949135	-0.765217	0.708709	1.00564
CG15353	-0.5	-0.5	-0.5	1.5
CG15356	-1.03101	1.33709	-0.379279	0.073205
CG15362	-1.17507	-0.373502	1.14889	0.399684
CG15365	-0.5	-0.5	-0.5	1.5
CG15375	0	0	0	0
CG15382	1.41456	-0.00103597	-0.706761	-0.706761
CG15385	-0.5	-0.5	-0.5	1.5
CG15387	0.577834	-1.45146	0.13868	0.734944
CG15390	-0.828955	-0.828955	0.474459	1.18345
CG15399	0.489185	-0.646873	-1.00047	1.15815
CG15418	-0.5	-0.5	-0.5	1.5
CG1542	-0.399857	1.16533	0.388349	-1.15382
CG15422	-0.5	-0.5	-0.5	1.5
CG15423	-0.825335	-0.825335	1.19634	0.45433
CG15432	1.47657	-0.740788	-0.379921	-0.355859
CG15435	-1.23204	-0.341844	0.535293	1.03859
CG15436	-0.789554	1.29275	-0.789554	0.286353
CG15439	-0.71901	1.46343	-0.551553	-0.192864
CG1544	1.46035	-0.16644	-0.68293	-0.610977
CG15443	-1.27817	1.04942	-0.231185	0.459938
CG15445	-1.30789	0.143746	1.12574	0.0384043
CG15449	-0.629105	1.4708	-0.629105	-0.212592
CG15456	-1.27492	0.364896	1.09819	-0.188176
CG15482	1.46925	-0.221266	-0.706521	-0.541461
CG15484	-0.5	1.5	-0.5	-0.5
CG15514	-0.405422	1.43456	-0.162355	-0.866783
CG15525	-1.44558	0.827163	0.177161	0.441257
CG15530	-0.5	-0.5	-0.5	1.5
CG15531	-0.5	-0.5	1.5	-0.5
CG15535	1.47067	-0.248563	-0.730557	-0.491553
CG15536	1.49441	-0.616379	-0.413127	-0.464906
CG15543	-0.5	-0.5	-0.5	1.5
CG15547	1.14205	0.535447	-0.806891	-0.870603
CG15561	1.04458	-1.07696	0.627949	-0.595571
CG15579	-0.5	1.5	-0.5	-0.5
CG15597	-0.5	-0.5	-0.5	1.5
CG15601	-1.2394	0.669795	-0.368282	0.937887
CG15602	-1.44514	0.176571	0.439639	0.828926
CG15611	0.233563	1.23118	-0.309921	-1.15482
CG15628	-0.518348	1.49949	-0.518348	-0.462788
CG15642	-0.523018	1.49919	-0.523018	-0.45315
CG15643	-0.740251	1.00648	-0.970846	0.704618
CG15650	-0.5	-0.5	-0.5	1.5
CG15653	-0.923132	-0.684801	1.24337	0.364562
CG15657	-0.5	-0.5	1.5	-0.5
CG15673	-0.5	-0.5	-0.5	1.5
CG15674	-0.767844	-0.767844	1.33426	0.201424
CG15695	0.935373	0.768253	-0.647249	-1.05638
CG15696	0	0	0	0
CG15701	-0.5	-0.5	-0.5	1.5
CG15706	1.34533	0.0856245	-0.997392	-0.43356
CG15715	-1.21512	0.808031	0.831124	-0.424037
CG15717	-1.35887	-0.100088	0.928467	0.530487
CG1572	-0.479514	-0.462561	1.49874	-0.556666
CG15725	-0.511237	1.49981	-0.511237	-0.477335
CG15739	-0.547698	1.49641	-0.547698	-0.401014
CG15740	0.931968	0.795478	-0.921232	-0.806214
CG15743	1.49932	-0.464551	-0.538032	-0.496739
CG15744	-0.669248	1.44656	-0.669248	-0.108064
CG15747	-1.37611	-0.0729875	0.884345	0.564748
CG1575	-1.20174	0.686214	-0.432177	0.947706
CG15771	0.0923577	0.934107	-1.40545	0.378983
CG1578	1.26656	0.306885	-0.96533	-0.60811
CG15784	1.3155	0.240523	-0.800442	-0.755581
CG15814	1.41007	-0.259577	-0.951083	-0.19941
CG15818	-0.863475	-0.840237	1.07219	0.631517
CG1582	0.929691	0.743716	-1.13871	-0.534699
CG15820	-0.739994	-0.269736	-0.462057	1.47179
CG15822	-0.5	-0.5	-0.5	1.5
CG15861	-1.20162	-0.301103	0.341266	1.16146
CG15864	-0.5	-0.5	1.5	-0.5
CG15870	0	0	0	0
CG15877	-1.39903	0.204151	0.976369	0.218509
CG15879	-0.95214	-0.775138	0.843034	0.884243
CG15891	-1.3262	-0.209896	0.861144	0.674954
CG15892	-0.844624	0.574028	-0.844624	1.11522
CG15908	-1.16231	-0.457118	1.0635	0.555929
CG15909	-0.829636	-0.829636	1.18093	0.478342
CG15912	-1.19821	-0.275732	1.18531	0.288633
CG15914	1.17387	0.488513	-0.859531	-0.802857
CG15916	-1.16426	1.21092	-0.320883	0.274229
CG15922	1.25984	-0.950855	0.325588	-0.63457
CG15923	1.28982	0.292017	-0.790917	-0.790917
CG1598	1.42229	-0.180939	-0.915516	-0.325839
CG1602	-0.744062	-0.744062	1.37075	0.11737
CG1603	-0.865694	-0.865694	0.899549	0.83184
CG1607	-0.951275	-0.736732	1.09661	0.591402
CG1620	1.46993	-0.27058	-0.752737	-0.446617
CG1622	0.717795	0.968493	-0.593137	-1.09315
CG1628	-1.06744	1.27708	0.21741	-0.42705
CG1635	-1.37168	-0.0221041	0.426061	0.967721
CG1636	-0.903584	0.418191	-0.729633	1.21503
CG1637	1.26271	-1.18405	-0.0238049	-0.054852
CG1638	0	0	0	0
CG1640	1.47207	-0.72339	-0.495666	-0.253018
CG1646	-1.43214	0.220742	0.894233	0.317165
CG1647	-0.610269	1.41297	-0.794363	-0.00834061
CG1648	-1.25993	-0.347428	0.809995	0.797361
CG1662	-1.04953	-0.505035	1.2437	0.310858
CG1663	-0.5	-0.5	-0.5	1.5
CG16700	-0.858273	0.694767	-0.858273	1.02178
CG1671	0.751274	0.881433	-0.412747	-1.21996
CG16710	-1.1635	-0.481447	0.997883	0.647068
CG16711	1.06945	0.634097	-0.891492	-0.812056
CG16713	0.876402	-0.661417	0.833608	-1.04859
CG16717	-1.00636	-0.53973	1.27341	0.272674
CG16721	1.45663	-0.814755	-0.385803	-0.256068
CG1673	1.4903	-0.338956	-0.601358	-0.549985
CG16734	1.46469	-0.185916	-0.604131	-0.674643
CG1674	-0.5	-0.5	-0.5	1.5
CG16743	-0.627708	1.49363	-0.441237	-0.424686
CG16753	-0.951947	-0.551874	1.32571	0.178111
CG16758	-0.5	-0.5	-0.5	1.5
CG1677	0.654535	0.883293	-1.32069	-0.217135
CG16779	-0.5	-0.5	-0.5	1.5
CG16782	-1.30462	-0.0754261	1.10235	0.277697
CG16787	-0.952834	-0.0521213	-0.387585	1.39254
CG16789	-0.5	-0.5	-0.5	1.5
CG16790	-0.7317	-0.885424	1.24047	0.376649
CG16791	-0.571603	-0.571603	1.49168	-0.348473
CG16812	-1.3909	0.672961	-0.0622099	0.780153
CG16824	-0.5	-0.5	-0.5	1.5
CG16863	-0.952598	1.18807	0.453812	-0.689281
CG16865	0.169727	1.21583	-1.20905	-0.176503
CG16868	-0.5	-0.5	-0.5	1.5
CG16890	-1.47798	0.580143	0.254049	0.643789
CG16896	-0.73054	1.47444	-0.460368	-0.283534
CG16903	0.758552	0.926692	-1.11264	-0.572609
CG16908	0.0720308	-0.633872	1.38437	-0.822525
CG16926	-0.954291	1.40723	-0.283219	-0.169725
CG16935	-0.238887	0.394751	-1.25585	1.09998
CG16952	1.17722	0.474649	-0.936712	-0.715152
CG16953	1.24045	-0.456152	-1.07977	0.295477
CG16957	-0.5	1.5	-0.5	-0.5
CG16972	-1.41113	0.223556	0.949844	0.237734
CG16974	0.522635	1.14616	-0.936196	-0.732601
CG16979	1.39329	-0.0207703	-0.927511	-0.445009
CG16985	0.141565	1.25371	-0.231393	-1.16388
CG16986	0.549402	-1.46848	0.703848	0.215229
CG16989	0.960532	-0.186432	-1.32059	0.546494
CG17002	-0.793204	1.424	-0.583806	-0.0469942
CG17019	1.28112	0.234761	-1.03605	-0.47983
CG17028	0	0	0	0
CG17029	-0.785225	1.44785	-0.147434	-0.515189
CG1703	-1.20731	-0.432927	0.750112	0.890122
CG17032	0	0	0	0
CG17036	-0.597479	1.48407	-0.597479	-0.289109
CG17059	-1.39273	0.487247	0.907135	-0.00165353
CG17065	0.83337	-0.157899	-1.35076	0.675288
CG17068	1.49752	-0.513945	-0.561074	-0.422496
CG17075	-0.5	-0.5	-0.5	1.5
CG17078	-1.36949	0.0309057	0.331921	1.00666
CG17104	-0.5	-0.5	-0.5	1.5
CG17109	1.49198	-0.570367	-0.570367	-0.351242
CG17110	0	0	0	0
CG17118	0	0	0	0
CG17119	1.30858	-0.883279	-0.669269	0.24397
CG17124	-0.700991	-0.700991	1.42017	-0.0181904
CG17129	-0.5	-0.5	-0.5	1.5
CG17141	1.22141	-1.21948	0.101565	-0.103493
CG17162	-0.5	1.5	-0.5	-0.5
CG17163	-0.821761	1.20831	-0.821761	0.435213
CG17167	-0.5	-0.5	-0.5	1.5
CG17168	-1.09851	-0.316156	0.118826	1.29584
CG17186	-1.48125	0.554552	0.277629	0.649069
CG17187	-0.935699	1.38716	-0.447474	-0.00398972
CG17189	0	0	0	0
CG17202	-1.21096	-0.370465	0.520637	1.06079
CG17219	-0.93718	0.0817702	1.36289	-0.507481
CG1722	-0.616733	1.47655	-0.616733	-0.24308
CG17221	-1.48314	0.413894	0.703975	0.365268
CG17230	-0.5	-0.5	-0.5	1.5
CG17233	0.257488	1.30554	-0.843636	-0.719396
CG17249	-0.458282	-0.846039	-0.130007	1.43433
CG17258	-0.5	-0.5	-0.5	1.5
CG17260	-0.121303	-1.33741	0.471758	0.986951
CG17261	-0.5	-0.5	-0.5	1.5
CG17266	-0.31142	0.722051	0.866447	-1.27708
CG17270	0	0	0	0
CG17271	-1.07118	-0.492152	1.22232	0.341009
CG17272	0.756819	0.960069	-0.732668	-0.98422
CG17278	-0.596221	1.49326	-0.527127	-0.369911
CG17292	-0.5	-0.5	-0.5	1.5
CG17294	-1.40665	0.393302	0.0864325	0.926917
CG17327	-1.07912	-0.506387	1.1941	0.391399
CG17328	1.36895	0.0226729	-0.976112	-0.415516
CG17333	0.69321	-1.33644	0.8347	-0.191468
CG17343	-1.23539	-0.337708	1.03399	0.539109
CG17350	-0.5	-0.5	-0.5	1.5
CG17359	1.22055	-1.15783	0.258236	-0.320951
CG17361	-1.06107	-0.0903647	1.3513	-0.199863
CG1737	1.45331	-0.187899	-0.471527	-0.793883
CG17376	-0.5	-0.5	-0.5	1.5
CG17377	0	0	0	0
CG1738	1.47618	-0.690727	-0.525599	-0.259857
CG17385	-1.28753	-0.284073	0.670453	0.901148
CG17387	-0.5	-0.5	-0.5	1.5
CG17440	-0.5	-0.5	-0.5	1.5
CG17454	-0.872936	-0.858754	0.841881	0.88981
CG17486	1.19665	-1.12631	0.350166	-0.420507
CG17490	-1.46136	0.580379	0.176369	0.704613
CG17493	-1.36228	0.834207	0.657006	-0.128928
CG1750	-0.820613	-0.528871	1.42851	-0.0790278
CG17508	0.105093	-1.42309	0.440831	0.87717
CG17528	-0.166034	1.06766	-1.29523	0.393594
CG17544	-1.47276	0.335683	0.758026	0.379053
CG17549	-0.5	-0.5	-0.5	1.5
CG17556	-1.33612	1.06646	0.278182	-0.00851748
CG17565	1.46335	-0.451907	-0.773005	-0.238438
CG17568	-0.712362	-0.712362	0.015885	1.40884
CG17570	-0.649937	-0.159486	1.45936	-0.649937
CG17574	0.943205	0.774117	-0.993771	-0.723551
CG17593	0.424999	-0.910436	1.21036	-0.724923
CG17597	-0.259562	1.45476	-0.823468	-0.371734
CG17598	-0.11897	1.43679	-0.821963	-0.495853
CG17600	-0.947437	0.774715	-0.77598	0.948702
CG17612	-0.5	-0.5	-0.5	1.5
CG17637	-0.5	-0.5	-0.5	1.5
CG1764	-1.15916	-0.440035	1.10291	0.496289
CG17646	0.648628	1.00776	-1.13793	-0.518459
CG17650	-0.5	-0.5	-0.5	1.5
CG17652	-1.38705	0.848954	0.593551	-0.0554587
CG17660	1.32571	-0.106543	-0.115635	-1.10353
CG17666	-0.5	-0.5	-0.5	1.5
CG17681	-0.862252	-0.862252	0.748041	0.976462
CG17683	-1.15145	-0.52251	0.830669	0.84329
CG17684	-0.802664	-0.802664	0.342815	1.26251
CG17691	0.381387	-1.10089	1.19154	-0.472036
CG17698	-1.46552	0.187607	0.622762	0.655151
CG17707	-0.560732	-0.560732	1.49409	-0.372626
CG17712	1.05391	-1.35358	0.227884	0.0717888
CG17715	-0.0895807	1.44137	-0.695221	-0.656571
CG17721	0.0413171	-1.31938	0.169558	1.1085
CG17724	-0.542341	1.49719	-0.542341	-0.412505
CG17726	-0.898308	1.10407	-0.793137	0.587377
CG17734	-1.08815	-0.538522	1.13183	0.494843
CG1774	0.555127	1.12876	-0.841943	-0.841943
CG17746	-1.01392	-0.626096	0.477124	1.16289
CG17754	0.639641	-0.922454	-0.780534	1.06335
CG17760	-0.92726	-0.793951	0.741128	0.980082
CG17765	1.46687	-0.672021	-0.196434	-0.598413
CG17768	-1.00976	-0.699922	0.975264	0.734414
CG17776	1.25895	0.349194	-0.80852	-0.799626
CG17786	-0.778688	0.0611866	1.39134	-0.673842
CG17802	-0.751556	1.45058	-0.557666	-0.141361
CG17806	-1.06094	0.695829	-0.630944	0.996058
CG17807	-0.858448	-0.31481	1.44561	-0.272351
CG17816	-0.759417	-0.759417	0.170712	1.34812
CG17829	1.49821	-0.43062	-0.528405	-0.539185
CG17834	-0.747549	-0.659011	-0.0100471	1.41661
CG17839	1.4126	0.00483128	-0.709558	-0.707869
CG17841	-1.25626	-0.233588	1.10368	0.386171
CG1785	-1.34336	0.968818	0.492744	-0.118198
CG17855	-0.972353	-0.639166	1.22259	0.388927
CG17883	1.09961	-0.892082	0.593921	-0.801445
CG1789	-1.31434	0.479939	1.0063	-0.171899
CG17896	1.07979	0.30089	-0.0616935	-1.31898
CG17904	1.44713	-0.127475	-0.756792	-0.562867
CG17919	0	0	0	0
CG1792	-1.21948	0.513157	1.0603	-0.353986
CG17928	1.4817	-0.280281	-0.647043	-0.554378
CG17931	0.421223	1.21654	-0.791882	-0.845884
CG17977	-1.01094	-0.0841101	1.37558	-0.280535
CG17982	0.687323	-1.44758	0.647606	0.112655
CG17985	0.631459	0.117698	0.699384	-1.44854
CG17996	1.25091	-0.942476	0.34548	-0.653915
CG18004	-0.806179	-0.251204	-0.400809	1.45819
CG1801	1.1063	0.566511	-0.669045	-1.00377
CG18011	-1.33889	-0.0510226	1.04053	0.349376
CG18048	-0.780113	-0.780113	1.31195	0.248281
CG1806	-0.5	-0.5	-0.5	1.5
CG18081	1.40849	-0.101848	-0.377504	-0.929133
CG18088	-0.5	-0.5	-0.5	1.5
CG18094	-0.735013	1.47543	-0.436386	-0.304029
CG1812	1.46073	-0.181975	-0.727544	-0.551211
CG18131	-0.5	-0.5	-0.5	1.5
CG18135	0.717292	0.999055	-0.773153	-0.943194
CG1814	1.39886	0.0262003	-0.828939	-0.596122
CG1815	1.48756	-0.314788	-0.572591	-0.60018
CG18155	-0.865922	-0.865922	0.846973	0.884871
CG18171	-0.86593	0.884144	-0.86593	0.847716
CG18178	0.184177	-0.258271	1.24051	-1.16641
CG18180	-0.519627	1.49941	-0.519627	-0.460155
CG18213	-0.596651	1.48435	-0.596651	-0.291051
CG1824	-1.17596	0.542001	-0.432152	1.06611
CG18249	1.44098	-0.0959216	-0.742472	-0.602586
CG18259	1.42748	-0.153548	-0.384705	-0.889227
CG18262	-0.0822972	0.753538	-1.38446	0.713218
CG1827	1.06675	0.638268	-0.87602	-0.829
CG18273	-1.20635	0.993159	-0.41092	0.624106
CG18278	-0.510411	1.49984	-0.510411	-0.479014
CG18281	-0.833791	-0.604277	1.39195	0.0461209
CG18324	1.49787	-0.568876	-0.489432	-0.439564
CG18335	1.38548	0.080142	-0.732811	-0.732811
CG18336	-0.5	-0.5	-0.5	1.5
CG18343	0.0245391	0.34547	1.00066	-1.37067
CG1835	-0.5	-0.5	-0.5	1.5
CG18371	-0.5	-0.5	-0.5	1.5
CG1840	-0.933537	-0.677285	1.23693	0.373892
CG18428	-1.25747	-0.14588	0.247371	1.15598
CG18446	1.45661	-0.147833	-0.654387	-0.654387
CG18449	-0.5	-0.5	-0.5	1.5
CG1847	-1.22714	0.424532	-0.302895	1.10551
CG18473	-0.5	1.5	-0.5	-0.5
CG18476	-0.784943	1.30237	-0.784943	0.267517
CG18477	-0.5	1.5	-0.5	-0.5
CG18480	-0.5	-0.5	-0.5	1.5
CG18507	-0.5	1.5	-0.5	-0.5
CG18508	-0.635467	0.0823973	1.38027	-0.827197
CG18528	-0.797692	1.27453	-0.797692	0.320853
CG18547	-1.37513	0.995173	0.0375808	0.34238
CG18549	0.720253	0.999179	-0.907948	-0.811484
CG18557	-0.998332	-0.71407	0.739418	0.972984
CG18558	-0.753859	-0.753859	0.151038	1.35668
CG18563	-0.549239	-0.549239	-0.397688	1.49617
CG18568	0	0	0	0
CG18596	-1.36712	0.106139	1.03341	0.22757
CG18600	-1.29944	0.723067	0.846095	-0.26972
CG18605	0	0	0	0
CG18622	-0.5	-0.5	-0.5	1.5
CG18628	-0.5	-0.5	-0.5	1.5
CG18659	-0.400863	-1.2159	0.644154	0.972607
CG18661	-0.0486873	1.42825	-0.745145	-0.634418
CG18662	-0.5	-0.5	-0.5	1.5
CG18731	0.214408	0.600589	-1.4708	0.655801
CG18744	1.05002	0.659931	-0.854973	-0.854973
CG18747	1.3182	0.0360476	-0.262353	-1.09189
CG18749	-1.31611	-0.0220648	0.237815	1.10036
CG18754	-0.293831	1.48373	-0.641306	-0.548588
CG18764	-0.651648	-0.651648	-0.155018	1.45831
CG18766	-1.32867	0.696971	-0.208244	0.839943
CG18787	-0.96381	1.27104	-0.605462	0.298233
CG18789	-0.726111	-0.726111	0.0586347	1.39359
CG18808	1.5	-0.5	-0.5	-0.5
CG18809	-1.18359	1.25333	-0.148536	0.0787927
CG18815	-1.25606	-0.34667	0.707101	0.895626
CG1882	1.44887	-0.136317	-0.758254	-0.554298
CG18858	1.46916	-0.20525	-0.65098	-0.612926
CG18870	-0.977405	0.151325	-0.503632	1.32971
CG1888	-1.30815	1.11239	0.224704	-0.0289423
CG1890	-0.818357	-0.911257	0.819431	0.910184
CG1896	-0.279001	-0.827883	1.4546	-0.347716
CG1902	1.22167	0.352935	-1.05496	-0.519639
CG1907	-1.26816	-0.331377	0.836599	0.762934
CG1910	1.08676	-0.182635	0.377654	-1.28178
[truncated: 6,543 more rows]

## Sheet: LM4
gene	Unwouned_AverageExpression	Wounded_AverageExpression	Wasp inf. 24h_AverageExpression	Wasp inf. 48h_AverageExpression
128up	-0.984968	-0.0625084	1.38319	-0.335718
14-3-3epsilon	-0.206827	-1.30863	0.977263	0.538198
14-3-3zeta	1.43522	-0.357408	-0.879163	-0.198653
140up	0.87094	-0.374801	0.746393	-1.24253
18SrRNA-Psi:CR41602	1.32199	-1.055	0.0941841	-0.361172
18w	0	0	0	0
26-29-p	-1.33387	1.04564	0.351333	-0.0631043
28SrRNA-Psi:CR40741	1.47935	-0.284599	-0.68907	-0.50568
28SrRNA-Psi:CR41609	1.49945	-0.518961	-0.518961	-0.461528
28SrRNA-Psi:CR45853	0	0	0	0
28SrRNA-Psi:CR45855	-1.32098	-0.0676115	1.07268	0.315917
28SrRNA-Psi:CR45859	-1.06123	-0.639898	0.943883	0.757241
28SrRNA-Psi:CR45860	0	0	0	0
312	-0.68315	-0.68315	1.43589	-0.0695871
4E-T	1.49643	-0.401408	-0.543144	-0.551877
5.8SrRNA-Psi:CR45854	0	0	0	0
5.8SrRNA-Psi:CR45863	-0.5	-0.5	-0.5	1.5
5PtaseI	-0.5	-0.5	-0.5	1.5
a	-0.5	-0.5	-0.5	1.5
A16	1.47589	-0.251988	-0.6801	-0.5438
a6	1.46885	-0.632974	-0.632974	-0.202902
AANATL2	-0.5	-0.5	-0.5	1.5
Aatf	-0.5	-0.5	-0.5	1.5
aay	-1.02338	-0.491726	0.226926	1.28818
ab	-0.5	1.5	-0.5	-0.5
ABCA	-0.954333	1.40211	-0.116424	-0.33135
ABCB7	-0.797822	1.27422	-0.797822	0.321421
ABCD	-1.20549	0.770538	-0.437685	0.872638
abd-A	0	0	0	0
Abi	0.0158284	0.953352	-1.38493	0.415747
Abl	0.672914	0.823535	-1.36031	-0.136139
abo	-0.633852	1.4684	-0.633852	-0.200691
Abp1	-0.850428	-0.850428	0.619027	1.08183
abs	-0.933582	1.39536	-0.424242	-0.0375389
Ac13E	-0.5	-0.5	-0.5	1.5
Ac3	-0.5	-0.5	-0.5	1.5
Ac76E	-0.5	-0.5	-0.5	1.5
Ac78C	-0.0359001	-1.2969	1.12931	0.203488
Acbp1	-1.44297	0.337998	0.863216	0.241758
Acbp3	0	0	0	0
Acbp5	-0.5	-0.5	-0.5	1.5
Acbp6	-0.5	-0.5	1.5	-0.5
ACC	-0.601891	1.48899	-0.327029	-0.560072
AcCoAS	-0.999722	0.332655	1.24661	-0.57954
Ace	-0.5	-0.5	-0.5	1.5
Acer	-0.582957	1.48867	-0.582957	-0.32276
achi	-0.5	-0.5	-0.5	1.5
acj6	0	0	0	0
Ack	-0.821785	1.20823	-0.821785	0.435341
Ack-like	-0.821534	1.43742	-0.494001	-0.121889
Acn	-1.40483	-0.0253655	0.675838	0.754357
Acox57D-d	0	0	0	0
Acox57D-p	-0.564791	1.49324	-0.564791	-0.36366
Acp95EF	0	0	0	0
Acph-1	-0.870438	1.43681	-0.1896	-0.376774
Acsl	1.29497	0.250319	-0.95491	-0.590377
Act42A	-1.40716	-0.0153423	0.648329	0.774171
Act57B	-0.698126	-0.698126	1.42286	-0.0266092
Act5C	0.925262	-0.52134	-1.14814	0.74422
Act79B	-0.5	-0.5	-0.5	1.5
Act87E	-0.5	-0.5	-0.5	1.5
Act88F	-0.5	-0.5	-0.5	1.5
Actbeta	-0.561227	1.49399	-0.561227	-0.371537
Actn	-0.865858	0.841777	-0.865858	0.889939
Acyp2	-1.40331	0.272234	0.167444	0.963629
Ada	-0.5	-0.5	-0.5	1.5
Ada1-1	-0.5	-0.5	-0.5	1.5
Ada1-2	-0.55658	1.4949	-0.55658	-0.381737
Ada2a	-0.842781	-0.842781	1.12463	0.560931
Ada2b	-0.73066	0.0731846	-0.73066	1.38813
AdamTS-A	-0.531489	1.49846	-0.531489	-0.435484
Adar	-0.5	-0.5	-0.5	1.5
Adck1	-0.5	1.5	-0.5	-0.5
Adck5	-0.5	-0.5	-0.5	1.5
ADD1	-1.23861	-0.373443	0.922302	0.689748
AdenoK	1.47559	-0.315081	-0.422181	-0.738326
Adf1	-1.24933	-0.299546	1.04824	0.500638
Adgf-A	-0.0764396	-0.777273	1.43323	-0.579521
Adh	-0.5	-0.5	-0.5	1.5
Adi1	-1.25164	-0.362093	0.795982	0.817747
AdipoR	-1.39948	0.0134133	0.492189	0.893879
Adk1	-0.868329	-0.779888	0.450296	1.19792
Adk2	-1.2836	0.171522	1.14959	-0.0375166
Adk3	-0.698293	-0.698293	1.42271	-0.0261188
AdoR	-0.5	-0.5	-0.5	1.5
adp	-1.1629	0.9529	0.703997	-0.493997
AdSL	-1.36699	0.00779408	0.357424	1.00177
AdSS	0.879499	0.787006	-1.16377	-0.502735
Aduk	-0.820183	1.21337	-0.820183	0.426993
Ady43A	-1.10318	-0.291743	0.0953903	1.29953
Aef1	-0.862114	0.745837	-0.862114	0.978391
aft	-0.736884	1.38032	-0.736884	0.0934516
Afti	1.49588	-0.551009	-0.551009	-0.393861
Ag5r2	0	0	0	0
AGBE	-0.5	-0.5	-0.5	1.5
AgmNAT	0	0	0	0
ago	1.399	-0.766775	-0.673191	0.0409692
AGO1	-1.46227	0.774796	0.231566	0.455904
AGO2	0.00187305	1.38803	-0.926741	-0.463162
AGO3	-0.637727	-0.637727	1.46635	-0.190891
Agpat1	0	0	0	0
Agpat3	-1.48079	0.670294	0.526708	0.283791
Agpat4	0	0	0	0
agt	1.26487	0.336545	-0.848568	-0.752845
AhcyL1	-1.17141	-0.084854	-0.01666	1.27292
AIF	-0.80171	0.196148	1.33608	-0.730523
AIMP1	-1.38328	0.478885	0.925605	-0.021206
AIMP2	-1.03567	0.435353	1.18267	-0.582353
AIMP3	1.40638	-0.946076	-0.127414	-0.332885
Ak6	-1.49874	0.476413	0.557128	0.4652
Akap200	-1.22538	0.262878	1.17628	-0.213777
Akh	-0.5	-0.5	-0.5	1.5
akirin	1.372	-0.891136	-0.562822	0.0819541
Akt1	1.19876	-0.352662	-1.15812	0.31203
Aladin	-0.568901	1.49232	-0.568901	-0.354518
Alas	-0.769422	1.33154	-0.769422	0.207302
alc	-1.12918	1.28348	-0.258416	0.104117
Aldh	0.513366	0.655308	-1.48548	0.316809
Aldh-III	1.10515	0.521445	-1.11647	-0.510126
Aldh7A1	-0.960384	0.765538	0.955511	-0.760666
Alg-2	0.856623	0.367913	0.218724	-1.44326
Alg1	-1.21385	0.369081	1.14125	-0.296484
Alg10	1.26152	-0.808517	0.344584	-0.797583
Alg11	1.48255	-0.676344	-0.304059	-0.502147
Alg14	-0.843381	1.12162	-0.843381	0.565142
Alg2	-0.90015	-0.689629	1.26947	0.320314
Alg9	-0.87628	-0.11703	1.42539	-0.432082
Alh	-0.815235	0.184702	1.34057	-0.710036
alien	-1.04722	0.151019	-0.411828	1.30802
ALiX	0.402207	1.21983	-0.942793	-0.679248
Alk	0	0	0	0
AlkB	-0.614535	-0.614535	1.47749	-0.248421
Alp12	-0.554147	-0.554147	1.49534	-0.387046
alph	-0.000213252	-1.06055	-0.279753	1.34051
alpha-Cat	-1.36879	-0.108823	0.631811	0.845803
alpha-Est1	0	0	0	0
alpha-Est10	0	0	0	0
alpha-Est3	0	0	0	0
alpha-Est7	-0.987205	1.34245	-0.460602	0.105357
alpha-Est8	-0.5	-0.5	-0.5	1.5
alpha-Est9	-0.866022	-0.866022	0.869502	0.862542
alpha-Man-Ib	-0.949605	1.34056	0.139719	-0.530677
alpha-Man-Ic	0	0	0	0
alpha-Man-IIb	-0.5	-0.5	-0.5	1.5
alpha-PheRS	1.40984	0.0129445	-0.707753	-0.715031
alpha-Spec	0.717418	0.974617	-0.618046	-1.07399
alpha4GT1	-1.34589	0.280427	1.05347	0.0119966
alphaCOP	0.906845	0.820354	-0.944353	-0.782846
alphaSnap	1.47812	-0.254628	-0.6421	-0.581396
alphaTub67C	-0.5	-0.5	1.5	-0.5
alphaTub84B	-1.26939	-0.309271	0.636196	0.942469
alphaTub84D	1.46348	-0.422019	-0.258218	-0.783239
alphaTub85E	-1.43482	0.112044	0.497264	0.825511
Alr	1.3537	0.13524	-0.887188	-0.601751
Als2	-0.5	-0.5	-0.5	1.5
alt	-1.4757	0.238884	0.63224	0.604577
Ama	1.43683	-0.0728591	-0.681986	-0.681986
Amacr	-0.5	-0.5	-0.5	1.5
amn	-0.5	-0.5	-0.5	1.5
AMPdeam	-0.884222	-0.290964	1.43699	-0.261807
Amph	-0.5	-0.5	-0.5	1.5
AMPKalpha	-0.704156	1.41713	-0.704156	-0.00881504
Amun	-0.872311	-0.753554	0.394895	1.23097
amx	-1.14561	0.0731054	1.28026	-0.207756
ana1	-0.60402	-0.60402	1.4817	-0.273659
ana2	0	0	0	0
ana3	0	0	0	0
Ance	-1.43205	0.497056	0.831539	0.103458
Ance-2	-0.729805	-0.729805	1.38917	0.0704362
Ance-3	-0.5	1.5	-0.5	-0.5
Ance-4	-0.5	-0.5	-0.5	1.5
Ance-5	0.976766	0.747634	-0.872052	-0.852348
anchor	-0.5	-0.5	-0.5	1.5
angel	-0.844254	1.11715	-0.844254	0.57136
Ank	0.348944	1.08354	-0.133928	-1.29855
Ank2	-0.5	-0.5	-0.5	1.5
anne	1.3878	-0.817016	0.063597	-0.634384
anox	-1.24975	1.19739	0.0650348	-0.0126802
Ant2	0	0	0	0
Antp	-0.5	-0.5	-0.5	1.5
antr	-0.543594	1.49701	-0.543594	-0.409826
AnxB10	1.32618	0.20775	-0.870912	-0.66302
AnxB11	0.0222741	1.39134	-0.527174	-0.886437
AnxB9	1.38485	-0.923167	-0.479217	0.017534
aop	1.13128	-0.809389	-0.872736	0.550848
aos	0	0	0	0
Aos1	-1.22489	1.05442	0.517269	-0.346802
AOX1	1.35066	0.152574	-0.857922	-0.645308
AOX3	-0.5	-0.5	-0.5	1.5
ap	-0.5	-0.5	-0.5	1.5
AP-1-2beta	1.22417	0.396167	-0.684249	-0.936089
AP-1gamma	-0.793216	1.28476	-0.793216	0.301672
AP-1mu	-0.801697	0.338488	-0.801697	1.26491
AP-1sigma	1.40108	0.037777	-0.7332	-0.70566
AP-2alpha	-1.36711	0.435532	0.969471	-0.0378891
AP-2mu	-0.192169	1.38092	-1.01245	-0.176299
AP-2sigma	-1.18122	-0.133874	0.056686	1.25841
Apc	-0.865292	0.814916	-0.865292	0.915669
APC10	-0.5	-0.5	-0.5	1.5
Apc2	-0.5	1.5	-0.5	-0.5
APC4	-0.833518	1.16593	-0.833518	0.501111
ApepP	-1.23476	0.922934	0.692075	-0.380245
Apf	-1.34635	0.718458	-0.172888	0.800784
aph-1	0.765398	-1.45456	0.170022	0.519142
aPKC	-1.04963	1.16169	-0.576829	0.464766
Apl	1.49973	-0.513415	-0.513415	-0.472897
Aplip1	-0.5	-0.5	-0.5	1.5
Apoltp	0	0	0	0
app	-0.754127	1.35628	-0.754127	0.151977
APP-BP1	-0.735046	1.38267	-0.735046	0.0874232
Appl	0	0	0	0
Aprt	-0.87612	-0.0730424	1.41708	-0.467921
Aps	1.20859	-0.790443	-0.852147	0.434002
apt	0	0	0	0
aqz	-1.02693	0.016242	-0.341539	1.35222
aralar1	-0.789335	-0.789335	0.285448	1.29322
Arc1	-0.848658	0.377857	-0.771123	1.24192
Arc2	-1.25289	-0.333522	0.618994	0.967413
Arc42	0.850354	0.833813	-1.12795	-0.556214
Archease	1.49194	-0.593298	-0.545026	-0.35362
Arf102F	-1.33226	-0.137958	0.985394	0.484822
Arf51F	1.00845	-1.14333	-0.509932	0.64482
Arf79F	-1.40743	0.0334308	0.494527	0.879471
ArfGAP1	-1.28049	-0.302499	0.880692	0.702297
ArfGAP3	-1.22284	0.758526	0.873058	-0.408745
Arfip	-1.4699	0.290985	0.762396	0.416515
Arfrp1	-1.07015	1.27598	-0.423444	0.217617
arg	-0.690972	1.42929	-0.690972	-0.0473486
Argk	-0.800439	1.26798	-0.800439	0.332896
Argl	-0.843362	1.27926	0.309899	-0.745793
ArgRS-m	-0.582376	1.48884	-0.582376	-0.324089
ari-1	-1.07753	0.551635	-0.572624	1.09852
ari-2	-0.5	-0.5	-0.5	1.5
Arl1	1.39986	-0.410933	-0.0571136	-0.931811
Arl2	-0.749391	-0.479863	-0.237609	1.46686
Arl4	1.26378	-1.14865	-0.253577	0.138454
Arl5	-1.434	0.602867	0.0729127	0.758216
Arl6IP1	0.913254	-1.16391	-0.49912	0.749775
arm	1.4707	-0.310698	-0.763997	-0.396004
armi	-0.5	-0.5	-0.5	1.5
Arp1	1.13075	-1.14825	-0.440008	0.457508
Arp10	-1.13477	1.22941	-0.360665	0.266029
Arp2	1.46906	-0.226008	-0.526158	-0.716895
Arp3	-0.99511	-0.693355	1.07178	0.616686
Arp5	-1.12808	0.188189	1.26062	-0.320725
Arp6	-1.27145	-0.266664	1.02341	0.514708
Arp8	-0.5	-0.5	-0.5	1.5
Arpc1	1.21122	-1.02136	-0.580594	0.390735
Arpc2	0.818299	-1.14739	0.857268	-0.528173
Arpc3A	1.47333	-0.295562	-0.744394	-0.433376
Arpc3B	0.342079	-1.10149	1.21078	-0.451369
Arpc4	-1.48141	0.272105	0.614078	0.595226
Arpc5	-1.31958	0.158282	1.10949	0.0518108
arr	-0.5	-0.5	-0.5	1.5
Ars2	0.2366	-0.306121	1.22805	-1.15853
Art1	-0.897467	1.42788	-0.178471	-0.351941
Art3	-0.814474	1.26984	0.329302	-0.784666
Art4	-0.5	-0.5	-0.5	1.5
Art7	-0.5	-0.5	-0.5	1.5
Art8	-0.5	-0.5	-0.5	1.5
Arts	-0.761114	1.34542	-0.761114	0.176809
aru	-1.20993	-0.0720798	0.0455703	1.23644
Arv1	-0.5	-0.5	-0.5	1.5
arx	-0.834807	-0.834807	1.16068	0.508933
Asap	1.38909	0.0397084	-0.869532	-0.559263
Asator	-0.804152	0.349531	-0.804152	1.25877
Asciz	-0.5	-0.5	-0.5	1.5
asf1	-1.44812	0.206374	0.832303	0.40944
ash1	-0.886494	-0.323146	1.43491	-0.225268
ash2	-1.02778	0.119589	1.325	-0.416817
asl	-0.5	-0.5	-0.5	1.5
AsnRS-m	-0.575975	-0.575975	1.49058	-0.338633
asp	0	0	0	0
Asph	-0.5	-0.5	-0.5	1.5
AspRS-m	1.49911	-0.463021	-0.545665	-0.490427
asrij	-1.33919	1.06672	0.261855	0.0106228
asRNA:ASTR	0	0	0	0
asRNA:CR17025	0	0	0	0
asRNA:CR31144	-0.5	-0.5	-0.5	1.5
asRNA:CR31514	-0.5	-0.5	1.5	-0.5
asRNA:CR31912	0	0	0	0
asRNA:CR32252	0	0	0	0
asRNA:CR42254	-0.5	-0.5	-0.5	1.5
asRNA:CR42547	-0.5	-0.5	1.5	-0.5
asRNA:CR42738	-0.794022	-0.794022	0.305086	1.28296
asRNA:CR43159	0	0	0	0
asRNA:CR43257	-0.633884	-0.20061	-0.633884	1.46838
asRNA:CR43425	-0.5	-0.5	-0.5	1.5
asRNA:CR43465	-0.5	-0.5	-0.5	1.5
asRNA:CR43466	-0.5	-0.5	-0.5	1.5
asRNA:CR43468	-0.5	-0.5	-0.5	1.5
asRNA:CR43474	0	0	0	0
asRNA:CR43629	-0.5	-0.5	-0.5	1.5
asRNA:CR43683	-0.5	-0.5	-0.5	1.5
asRNA:CR43723	0	0	0	0
asRNA:CR43730	0	0	0	0
asRNA:CR43767	-0.5	-0.5	-0.5	1.5
asRNA:CR43786	0	0	0	0
asRNA:CR43809	0	0	0	0
asRNA:CR43812	0	0	0	0
asRNA:CR43824	0	0	0	0
asRNA:CR43833	-0.537646	1.49779	-0.537646	-0.422497
asRNA:CR43864	0	0	0	0
asRNA:CR43868	0	0	0	0
asRNA:CR43875	1.47774	-0.249854	-0.613944	-0.613944
asRNA:CR43889	-0.5	-0.5	-0.5	1.5
asRNA:CR43906	-0.517195	1.49955	-0.517195	-0.465158
asRNA:CR43916	1.33639	0.19442	-0.813266	-0.717542
asRNA:CR43933	-0.5	-0.5	-0.5	1.5
asRNA:CR43944	0	0	0	0
asRNA:CR43957	0.846034	0.835498	-1.13436	-0.547172
asRNA:CR43964	0	0	0	0
asRNA:CR44019	0	0	0	0
asRNA:CR44021	-0.5	-0.5	-0.5	1.5
asRNA:CR44029	-1.07926	1.2733	-0.409338	0.21529
asRNA:CR44030	-0.604227	-0.604227	-0.273166	1.48162
asRNA:CR44031	1.41936	-0.0156623	-0.701847	-0.701847
asRNA:CR44047	0	0	0	0
asRNA:CR44049	0	0	0	0
asRNA:CR44054	0	0	0	0
asRNA:CR44064	0	0	0	0
asRNA:CR44065	0	0	0	0
asRNA:CR44093	-0.5	-0.5	1.5	-0.5
asRNA:CR44095	1.2085	0.345336	-0.450539	-1.1033
asRNA:CR44114	-0.5	-0.5	-0.5	1.5
asRNA:CR44116	-0.5	-0.5	-0.5	1.5
asRNA:CR44119	-0.5	-0.5	-0.5	1.5
asRNA:CR44124	0	0	0	0
asRNA:CR44134	0	0	0	0
asRNA:CR44137	-0.5	-0.5	-0.5	1.5
asRNA:CR44147	0	0	0	0
asRNA:CR44160	-0.5	-0.5	-0.5	1.5
asRNA:CR44168	1.49816	-0.53444	-0.53444	-0.429276
asRNA:CR44169	1.5	-0.5	-0.5	-0.5
asRNA:CR44179	1.16448	0.352119	-1.1884	-0.328193
asRNA:CR44201	-0.5	-0.5	-0.5	1.5
asRNA:CR44224	-0.5	-0.5	-0.5	1.5
asRNA:CR44266	-0.5	1.5	-0.5	-0.5
asRNA:CR44267	0	0	0	0
asRNA:CR44291	-0.535279	1.49806	-0.535279	-0.427504
asRNA:CR44321	0	0	0	0
asRNA:CR44340	-0.5	-0.5	-0.5	1.5
asRNA:CR44367	-0.536587	1.49791	-0.536587	-0.42474
asRNA:CR44368	0	0	0	0
asRNA:CR44372	-0.5	-0.5	-0.5	1.5
asRNA:CR44375	-0.5	-0.5	-0.5	1.5
asRNA:CR44381	0	0	0	0
asRNA:CR44382	0	0	0	0
asRNA:CR44386	-0.5	-0.5	-0.5	1.5
asRNA:CR44390	-0.5	-0.5	-0.5	1.5
asRNA:CR44429	-0.710051	1.41123	-0.710051	0.00886831
asRNA:CR44431	0	0	0	0
asRNA:CR44512	0	0	0	0
asRNA:CR44690	-0.5	-0.5	-0.5	1.5
asRNA:CR44704	-0.5	-0.5	-0.5	1.5
asRNA:CR44793	0	0	0	0
asRNA:CR44806	0	0	0	0
asRNA:CR44807	-0.5	1.5	-0.5	-0.5
asRNA:CR44841	0	0	0	0
asRNA:CR44843	-0.5	-0.5	-0.5	1.5
asRNA:CR44849	0	0	0	0
asRNA:CR44891	0	0	0	0
asRNA:CR44910	0	0	0	0
asRNA:CR44911	0	0	0	0
asRNA:CR44959	-0.5	-0.5	-0.5	1.5
asRNA:CR44960	-0.5	-0.5	-0.5	1.5
asRNA:CR44961	-0.5	-0.5	-0.5	1.5
asRNA:CR44962	-0.5	-0.5	-0.5	1.5
asRNA:CR44968	0	0	0	0
asRNA:CR44969	-0.5	1.5	-0.5	-0.5
asRNA:CR44972	-0.5	-0.5	-0.5	1.5
asRNA:CR44976	-0.533279	1.49828	-0.533279	-0.431722
asRNA:CR44981	0	0	0	0
asRNA:CR44987	-0.5	-0.5	-0.5	1.5
asRNA:CR44996	0	0	0	0
asRNA:CR45000	-0.5	-0.5	-0.5	1.5
asRNA:CR45007	-0.54377	1.49699	-0.54377	-0.409449
asRNA:CR45009	0	0	0	0
asRNA:CR45026	-0.5	1.5	-0.5	-0.5
asRNA:CR45028	0	0	0	0
asRNA:CR45044	1.47774	-0.249854	-0.613944	-0.613944
asRNA:CR45053	0	0	0	0
asRNA:CR45108	-0.5	-0.5	-0.5	1.5
asRNA:CR45124	-0.838835	-0.838835	1.14332	0.534349
asRNA:CR45126	-0.5	-0.5	-0.5	1.5
asRNA:CR45131	-0.5	-0.5	-0.5	1.5
asRNA:CR45132	0	0	0	0
asRNA:CR45135	0	0	0	0
asRNA:CR45136	-0.5	-0.5	-0.5	1.5
asRNA:CR45139	1.47847	-0.25409	-0.612192	-0.612192
asRNA:CR45140	-0.5	-0.5	-0.5	1.5
asRNA:CR45141	-0.5	1.5	-0.5	-0.5
asRNA:CR45142	1.07176	0.632168	-0.851965	-0.851965
asRNA:CR45145	0	0	0	0
asRNA:CR45160	0	0	0	0
asRNA:CR45164	-0.521383	1.4993	-0.521383	-0.456533
asRNA:CR45171	0	0	0	0
asRNA:CR45175	-0.5	-0.5	-0.5	1.5
asRNA:CR45182	0	0	0	0
asRNA:CR45189	0	0	0	0
asRNA:CR45190	-0.5	-0.5	-0.5	1.5
asRNA:CR45195	-0.552793	1.49558	-0.552793	-0.389989
asRNA:CR45198	-0.5	-0.5	-0.5	1.5
asRNA:CR45202	-0.5	-0.5	-0.5	1.5
asRNA:CR45208	0	0	0	0
asRNA:CR45210	0	0	0	0
asRNA:CR45214	0	0	0	0
asRNA:CR45264	-0.522904	1.49919	-0.522904	-0.453387
asRNA:CR45275	1.4945	-0.558668	-0.558668	-0.377163
asRNA:CR45350	-0.527739	1.49881	-0.527739	-0.443333
asRNA:CR45366	0	0	0	0
asRNA:CR45367	-0.569792	1.49211	-0.569792	-0.352528
asRNA:CR45396	-0.839266	-0.839266	0.537168	1.14137
asRNA:CR45397	-0.5	-0.5	-0.5	1.5
asRNA:CR45445	-0.5	-0.5	-0.5	1.5
asRNA:CR45466	0	0	0	0
asRNA:CR45467	0	0	0	0
asRNA:CR45468	0	0	0	0
asRNA:CR45479	0	0	0	0
asRNA:CR45485	0	0	0	0
asRNA:CR45501	-0.5	-0.5	-0.5	1.5
asRNA:CR45518	-0.5	-0.5	-0.5	1.5
asRNA:CR45520	0	0	0	0
asRNA:CR45528	-0.5	-0.5	-0.5	1.5
asRNA:CR45549	0	0	0	0
asRNA:CR45604	1.5	-0.5	-0.5	-0.5
asRNA:CR45612	0	0	0	0
asRNA:CR45620	0	0	0	0
asRNA:CR45683	-0.518718	-0.518718	1.49946	-0.462029
asRNA:CR45686	0	0	0	0
asRNA:CR45714	-0.5	-0.5	-0.5	1.5
asRNA:CR45778	-0.696348	-0.0317982	1.4245	-0.696348
asRNA:CR45789	0	0	0	0
asRNA:CR45798	1.49248	-0.357665	-0.585841	-0.548973
asRNA:CR45804	0	0	0	0
asRNA:CR45806	0	0	0	0
asRNA:CR45813	0	0	0	0
asRNA:CR45814	0	0	0	0
asRNA:CR45815	-0.5	1.5	-0.5	-0.5
asRNA:CR45822	-0.658828	-0.658828	1.45374	-0.136089
asRNA:CR45827	0	0	0	0
asRNA:CR45831	0	0	0	0
asRNA:CR45835	-0.5	-0.5	-0.5	1.5
asRNA:CR45865	-0.5	-0.5	-0.5	1.5
asRNA:CR45871	0	0	0	0
asRNA:CR45873	-0.5	-0.5	-0.5	1.5
asRNA:CR45874	1.42022	-0.223009	-0.927682	-0.269529
asRNA:CR45889	-0.5	-0.5	-0.5	1.5
asRNA:CR45891	-0.5	-0.5	-0.5	1.5
asRNA:CR45895	0	0	0	0
asRNA:CR45896	0	0	0	0
asRNA:CR45907	-0.5	-0.5	-0.5	1.5
asRNA:CR45908	0	0	0	0
asRNA:CR45912	0	0	0	0
asRNA:CR45925	1.40797	-0.04598	-0.890757	-0.471233
asRNA:CR45926	-0.549669	1.4961	-0.549669	-0.39676
asRNA:CR45928	-0.5	-0.5	-0.5	1.5
asRNA:CR45929	1.5	-0.5	-0.5	-0.5
asRNA:CR45943	-0.5	-0.5	-0.5	1.5
asRNA:CR45952	0	0	0	0
asRNA:CR45968	0	0	0	0
asRNA:CR45969	-0.5	-0.5	-0.5	1.5
asRNA:CR45970	0	0	0	0
asRNA:CR45999	-0.5	-0.5	-0.5	1.5
asRNA:CR46020	0	0	0	0
asRNA:CR46033	0	0	0	0
asRNA:CR46044	-0.5	-0.5	-0.5	1.5
asRNA:CR46048	-0.5	-0.5	-0.5	1.5
asRNA:CR46050	0	0	0	0
asRNA:CR46055	0	0	0	0
asRNA:CR46067	-0.646289	1.46153	-0.646289	-0.168953
asRNA:CR46081	0	0	0	0
asRNA:CR46089	0	0	0	0
asRNA:CR46093	-0.5	-0.5	-0.5	1.5
asRNA:CR46096	0	0	0	0
asRNA:CR46097	0	0	0	0
asRNA:CR46099	-0.584814	1.48813	-0.584814	-0.318506
asRNA:CR46104	1.05183	0.657641	-0.854738	-0.854738
asRNA:CR46109	0	0	0	0
ast	1.48844	-0.342722	-0.646171	-0.499547
AstA	-0.5	-0.5	-0.5	1.5
AstA-R1	0	0	0	0
asun	-0.690861	1.42939	-0.690861	-0.0476666
Asx	-0.604781	1.48141	-0.604781	-0.27185
Atac1	-0.603115	-0.603115	1.48204	-0.275806
Atac2	-0.5	-0.5	-0.5	1.5
Atac3	-1.3201	1.08421	0.282269	-0.0463748
ATbp	1.5	-0.5	-0.5	-0.5
Ate1	-1.43478	0.887896	0.231609	0.315277
Atet	-0.572092	1.49156	-0.572092	-0.347377
Atf-2	-0.781854	-0.781854	0.255157	1.30855
Atf3	1.20985	0.377215	-1.05294	-0.534129
Atf6	1.08105	-1.28804	0.378136	-0.171139
Atg1	0.23996	-1.12501	1.24412	-0.359069
Atg10	-0.5	-0.5	-0.5	1.5
Atg101	-0.865786	0.837012	-0.865786	0.89456
Atg12	-0.684584	-0.684584	1.43471	-0.0655425
Atg13	1.05421	-0.0589719	-1.33126	0.336023
Atg14	-0.816558	1.22456	-0.816558	0.408555
Atg16	-1.41783	0.899843	0.410453	0.107535
Atg17	1.0129	-0.52829	-1.13043	0.645821
Atg18a	0.948208	0.222892	-1.41183	0.240732
Atg18b	-0.0343772	-0.47786	-0.892636	1.40487
Atg2	-0.6561	1.45552	-0.6561	-0.143316
Atg3	-1.2674	-0.211707	1.09663	0.382476
Atg4a	-1.45577	0.825365	0.294983	0.335417
Atg4b	-1.30599	0.555899	0.968358	-0.218265
Atg5	-0.5	-0.5	-0.5	1.5
Atg6	-0.813335	-0.813335	0.392654	1.23402
Atg7	-0.857829	0.689727	-0.857829	1.02593
Atg8a	-0.52405	-0.978533	0.186064	1.31652
Atg9	-0.86179	-0.86179	0.740803	0.982776
atilla	-1.3671	-0.114914	0.641849	0.840162
atl	-1.37164	0.459204	-0.0395062	0.951938
atms	-0.705912	-0.705912	1.4154	-0.00357711
Atox1	-1.24325	1.18404	0.188719	-0.129507
ATP7	-0.857929	0.690846	-0.857929	1.02501
ATP8A	-0.152665	-1.35068	0.645994	0.85735
ATP8B	0.578403	1.10951	-0.773582	-0.914332
Atpalpha	1.12275	0.538166	-1.01817	-0.64275
ATPCL	1.31878	0.169905	-0.993196	-0.495489
ATPsynC	-0.830651	-0.05319	1.42085	-0.537008
ATPsynE	0.311601	-0.46928	1.23432	-1.07664
ATPsynepsilonL	0	0	0	0
ATPsynF	-0.800678	0.084903	1.38149	-0.665718
ATPsynGL	0	0	0	0
AttA	-0.5	-0.5	-0.5	1.5
AttB	-0.770075	-0.770075	0.209747	1.3304
AttD	-0.863141	0.963022	-0.863141	0.76326
Atu	-0.97445	0.0872159	1.35171	-0.464471
Atx-1	0	0	0	0
Atx2	-1.23406	0.0640035	1.21292	-0.0428587
Atxn7	-0.589008	1.48686	-0.589008	-0.308846
aub	0	0	0	0
aurA	-0.5	1.5	-0.5	-0.5
aurB	-0.90035	0.47771	1.17875	-0.756112
aux	1.42408	-0.031101	-0.676273	-0.716709
ave	-0.858302	1.0215	-0.858302	0.695101
Aven	-0.5	-0.5	-0.5	1.5
awd	0.0340101	0.0634934	1.17396	-1.27147
axed	-0.387766	-0.957643	-0.0440574	1.38947
Axn	-1.01172	1.36133	-0.350989	0.00137157
Axs	-1.09877	-0.538364	1.10384	0.53329
Axud1	-0.5	-0.5	-0.5	1.5
az2	-0.817089	1.22296	-0.817089	0.41122
b	0	0	0	0
B4	-1.45303	0.477961	0.183498	0.791571
B52	-1.3644	0.720552	-0.131913	0.775764
B9d1	-0.5	-0.5	-0.5	1.5
bab1	0	0	0	0
bab2	-0.5	-0.5	-0.5	1.5
babo	1.36914	0.00327192	-0.989276	-0.383132
babos	-0.5	-0.5	-0.5	1.5
Bacc	1.35138	-0.0172148	-0.290601	-1.04356
baf	-0.983527	1.29968	-0.541172	0.225016
bai	1.04701	-0.341954	0.524478	-1.22954
Baldspot	0.630312	0.202212	0.63618	-1.4687
ball	-0.5	-0.5	-0.5	1.5
bam	0	0	0	0
Bap170	-0.5	1.5	-0.5	-0.5
Bap55	-1.06115	1.35296	-0.124808	-0.167004
Bap60	-1.46795	0.219696	0.718401	0.529856
barc	-0.845966	0.583893	-0.845966	1.10804
barr	1.48278	-0.30785	-0.677953	-0.496974
baz	1.48248	-0.290292	-0.656704	-0.535479
bb8	0	0	0	0
bbc	0.337374	0.256844	0.8526	-1.44682
bbg	-0.5	-0.5	-0.5	1.5
bc10	0.946985	-0.0804422	-1.36098	0.494441
BCAS2	-0.862288	-0.862288	0.975943	0.748633
bchs	-0.705693	1.41562	-0.705693	-0.00423417
BCL7-like	-0.813061	-0.813061	1.2348	0.391323
bcn92	-1.45047	0.429701	0.201759	0.819011
Bdbt	-0.5	-0.5	-0.5	1.5
bdg	-1.45644	0.169971	0.537424	0.749044
bdl	-0.512643	1.49976	-0.512643	-0.47447
Bdp1	-1.39785	0.978136	0.185643	0.234075
be	-1.2272	0.997137	-0.371394	0.601461
BEAF-32	1.48247	-0.305977	-0.679324	-0.49717
beag	1.47855	-0.450515	-0.717114	-0.310922
beat-Ib	0	0	0	0
beat-Ic	0	0	0	0
beat-IIIc	-0.5	-0.5	-0.5	1.5
beat-VI	-0.5	-0.5	-0.5	1.5
beg	-0.694437	1.42623	-0.694437	-0.0373526
bel	1.25256	0.245673	-0.396712	-1.10152
Bem46	-0.7445	-0.7445	0.118848	1.37015
ben	0.752506	0.155714	-1.45337	0.545154
Best1	-1.48917	0.578992	0.32676	0.583415
Bet1	-1.30673	0.236587	1.11121	-0.0410696
Bet3	1.45177	-0.368742	-0.832985	-0.250045
Bet5	-1.49639	0.579433	0.410242	0.506719
beta-Man	0.823363	-0.990357	0.898151	-0.731157
beta-PheRS	0.850984	0.868961	-0.715708	-1.00424
beta-Spec	-1.15015	1.03271	0.608152	-0.490712
beta'COP	0.770428	0.918652	-1.10533	-0.583751
beta3GalTII	-0.815864	0.405095	-0.815864	1.22663
beta4GalNAcTA	-1.4003	0.505841	0.884976	0.00948801
beta4GalNAcTB	1.484	-0.464598	-0.686208	-0.333192
beta4GalT7	-1.27328	1.13749	-0.12659	0.262375
betaCOP	1.1969	0.446937	-0.912968	-0.730869
betaggt-I	0.883836	-1.14074	0.793487	-0.536579
betaggt-II	1.36368	0.133695	-0.72201	-0.775367
betaGlu	1.41767	-0.147179	-0.919389	-0.351103
betaTub56D	-1.40018	0.540932	-0.00497445	0.864218
betaTub60D	-1.08182	-0.604596	0.698073	0.988344
betaTub85D	-0.5	1.5	-0.5	-0.5
betaTub97EF	-0.387098	-1.1983	0.512075	1.07332
Bgb	-1.09018	-0.151011	1.33419	-0.0929919
bgm	-0.5	-0.5	-0.5	1.5
BHD	-0.782666	1.30694	-0.782666	0.258387
BI-1	1.32682	-0.0382168	-0.192734	-1.09587
bib	0	0	0	0
bic	1.32915	-0.0579557	-0.176221	-1.09497
BicD	-0.98714	0.988405	-0.724721	0.723457
bif	-0.363822	-1.24567	0.702965	0.906525
bigmax	-1.48553	0.415276	0.380176	0.69008
Bin1	-1.25184	0.452722	-0.274467	1.07359
bin3	-1.0638	-0.641979	0.878859	0.826921
bip1	0	0	0	0
bip2	1.14851	-1.24281	-0.209664	0.303965
Bka	-1.04327	1.18467	0.42837	-0.56977
blanks	0	0	0	0
Blimp-1	0	0	0	0
Blm	-0.602857	1.48213	-0.602857	-0.276419
Blos1	-1.35816	-0.128469	0.873421	0.613211
Blos2	-0.740808	0.106452	-0.740808	1.37516
Blos3	-1.27943	0.77578	-0.311372	0.815024
Blos4	-0.864592	-0.864592	0.794155	0.935029
blot	0	0	0	0
blow	-0.5	1.5	-0.5	-0.5
blp	1.3757	-0.917866	0.0540762	-0.511908
blw	0.345545	-0.0445604	1.03974	-1.34073
bma	0	0	0	0
Bmcp	-0.899738	0.311442	-0.685757	1.27405
bmm	-1.07381	0.442733	-0.536452	1.16753
bnl	-0.5	-0.5	-0.5	1.5
boca	-1.14609	-0.0350925	1.29332	-0.11214
BOD1	-0.860497	-0.860497	0.998661	0.722333
boi	0	0	0	0
bol	-0.702012	-0.702012	1.4192	-0.0151746
bon	-0.849507	-0.849507	1.08757	0.611444
bonsai	-0.657925	1.45434	-0.657925	-0.138484
bor	-0.83572	-0.83572	1.15688	0.514559
bora	0	0	0	0
BORCS5	-0.810081	1.24314	-0.810081	0.377025
BORCS6	-0.840551	-0.840551	0.54568	1.13542
BORCS7	-0.5	-0.5	-0.5	1.5
borr	-1.01405	1.34037	0.0836887	-0.410009
botv	1.25049	0.32499	-0.99938	-0.576101
bou	0	0	0	0
bowl	-0.5	-0.5	-0.5	1.5
BoYb	-0.5	1.5	-0.5	-0.5
br	1.28538	0.276335	-0.619657	-0.942055
Br140	-0.5	-0.5	-0.5	1.5
brat	-0.604426	1.48155	-0.604426	-0.272693
Brca2	-0.835065	-0.835065	0.510513	1.15962
Brd8	-0.779058	1.31398	-0.779058	0.244139
Bre1	-0.907306	-0.633882	0.22867	1.31252
Brf	-0.737477	1.37955	-0.737477	0.0954066
brk	-0.865852	0.890394	-0.865852	0.841309
brm	-1.47723	0.729384	0.429357	0.318491
Brms1	-0.86502	0.806036	-0.86502	0.924005
brn	-0.5	-0.5	-0.5	1.5
brp	-0.5	-0.5	-0.5	1.5
Bruce	1.30272	0.266359	-0.80651	-0.76257
BRWD3	1.38379	-0.534756	0.0438382	-0.892876
brwl	-0.810454	1.24211	-0.810454	0.378796
bs	-0.5	-0.5	-0.5	1.5
bsf	1.46644	-0.343941	-0.336229	-0.786267
Bsg	-0.538181	1.30831	-0.977574	0.207444
Bsg25D	-0.623872	-0.22558	-0.623872	1.47332
bsk	0.320641	-0.625937	-0.956133	1.26143
bt	1.39704	0.0464935	-0.767813	-0.675717
BTBD9	-0.5	-0.5	-0.5	1.5
BtbVII	1.35596	-0.0520203	-0.259189	-1.04475
BthD	-0.525594	1.49899	-0.525594	-0.447803
Btk29A	-0.5	1.5	-0.5	-0.5
btl	-0.5	-0.5	-0.5	1.5
btsz	-0.5	-0.5	-0.5	1.5
btz	1.49326	-0.564712	-0.564712	-0.363836
Bub1	1.49875	-0.52841	-0.52841	-0.441934
Bub3	1.49192	-0.643441	-0.414504	-0.433978
BubR1	0	0	0	0
bug	-1.28907	0.954009	0.598832	-0.263776
Bug22	-0.5	-0.5	-0.5	1.5
BuGZ	-0.874972	-0.154158	-0.402251	1.43138
bun	0.855099	0.814507	-1.16007	-0.509541
bur	0.663905	-1.45201	0.658938	0.129171
bves	-0.762614	-0.762614	0.182235	1.34299
bw	0	0	0	0
bwa	-0.858548	-0.858548	1.01914	0.697957
Bx	-0.5	-0.5	-0.5	1.5
Bx42	-0.866025	0.865867	-0.866025	0.866184
by	-0.84202	-0.84202	1.12838	0.555656
bys	-0.550279	1.496	-0.550279	-0.39544
c(2)M	0	0	0	0
c(3)G	-0.5	-0.5	-0.5	1.5
c11.1	-0.987131	0.714263	-0.723267	0.996135
c12.1	-1.02992	-0.596189	1.1748	0.451309
c12.2	-0.5	-0.5	-0.5	1.5
C1GalTA	-0.61574	1.49471	-0.453941	-0.425028
C3G	-1.1291	-0.0274332	-0.148229	1.30476
ca	-1.13943	1.29308	0.0175998	-0.171252
Ca-alpha1D	-0.5	-0.5	-0.5	1.5
Ca-alpha1T	0	0	0	0
Ca-Ma2d	0	0	0	0
CaBP1	-0.62029	0.717017	0.975465	-1.07219
cac	0	0	0	0
cact	-1.3137	0.899901	0.64208	-0.228285
cactin	-0.770577	1.32952	-0.770577	0.211629
Cad86C	0	0	0	0
Cad87A	-0.5	-0.5	-0.5	1.5
Cad96Ca	0	0	0	0
Cad99C	-0.5	-0.5	-0.5	1.5
CadN	0	0	0	0
Caf1-105	-0.5	-0.5	-0.5	1.5
Caf1-180	-0.98569	0.253185	1.28713	-0.554625
Caf1-55	-0.84962	1.08688	-0.84962	0.61236
cag	-1.21771	-0.327108	0.443058	1.10176
CAH1	-0.5	-0.5	-0.5	1.5
CAH13	0	0	0	0
CAH2	-0.5	1.5	-0.5	-0.5
CAH3	-0.860187	1.00216	-0.860187	0.718216
CAH7	-0.5	-0.5	-0.5	1.5
CAHbeta	-0.5	1.5	-0.5	-0.5
cal1	-0.816207	-0.816207	1.22561	0.406801
CalpA	-0.537422	-1.13203	0.969193	0.700255
CalpB	1.03327	0.619771	-1.12814	-0.524904
CalpC	-0.5	-0.5	-0.5	1.5
Cals	-1.22027	-0.0362121	0.028126	1.22835
Calx	-0.5	-0.5	-0.5	1.5
calypso	1.49977	-0.512352	-0.512352	-0.475065
Cam	-0.044864	-1.38588	0.551323	0.879418
CaMKI	-1.02072	-0.144631	-0.210478	1.37583
CaMKII	-1.38648	-0.0307879	0.898896	0.518372
Camp	-1.17833	0.453149	1.11865	-0.393467
Camta	-0.788267	1.29549	-0.788267	0.281047
cana	0	0	0	0
CanA-14F	1.39922	-0.592079	-0.831284	0.02414
CanB2	-1.12736	0.116768	-0.270834	1.28143
Cand1	-1.45134	0.59011	0.135202	0.726025
CAP	-0.902214	-0.791772	0.597684	1.0963
Cap-D2	-0.5	-0.5	-0.5	1.5
Cap-D3	-0.5	-0.5	-0.5	1.5
Cap-G	-0.606151	-0.606151	1.48089	-0.268584
Cap-H2	-0.510087	1.49985	-0.510087	-0.479671
Caper	1.28079	0.286317	-0.941148	-0.625963
Capr	1.33965	-0.973748	0.125452	-0.49135
caps	-0.5	-0.5	-0.5	1.5
capt	-1.45102	0.29986	0.309069	0.842088
capu	-1.15414	-0.190051	0.0686061	1.27559
car	1.49547	-0.606464	-0.461916	-0.42709
CARPB	0	0	0	0
CarT	-0.5	1.5	-0.5	-0.5
CASK	1.4341	-0.685325	-0.685325	-0.0634472
casp	-1.01923	0.040241	-0.370836	1.34983
Cat	0.333231	1.16588	-1.20012	-0.298986
cathD	0.137216	1.18547	-0.0692834	-1.25341
Catsup	-1.13474	0.642387	1.0138	-0.521452
cav	-0.5	-0.5	-0.5	1.5
caz	1.27275	0.238566	-1.05663	-0.454685
cbc	-0.5	-0.5	-0.5	1.5
Cbl	-1.2451	0.852388	0.764705	-0.371988
CBP	1.47219	-0.219694	-0.62625	-0.62625
Cbp20	-1.28201	0.096407	1.1604	0.0251989
Cbp80	1.48524	-0.492053	-0.66797	-0.325216
cbs	1.42668	-0.333699	-0.904212	-0.188768
Cbs	-0.5	-0.5	-0.5	1.5
cbt	1.35334	-0.0418892	-1.04737	-0.264076
Cby	-0.5	-0.5	-0.5	1.5
Cc2d2a	-0.5	-0.5	-0.5	1.5
CCAP	-0.5	-0.5	-0.5	1.5
CCDC53	-0.721685	1.39869	-0.721685	0.0446772
Ccdc56	-0.821062	-0.821062	0.431555	1.21057
Ccdc58	-1.03962	-0.477031	1.27866	0.237991
Ccdc85	-0.5	-0.5	-0.5	1.5
CCHa2	-0.5	-0.5	-0.5	1.5
Cchl	-0.727929	-0.727929	1.39143	0.0644255
Ccm3	1.23377	-0.777714	-0.848103	0.392051
Ccs	-1.33828	0.202312	1.07928	0.0566912
CCT2	-0.621191	-0.917262	1.31206	0.226394
CCT4	1.11454	-0.973604	0.56198	-0.702911
CCT8	0.104846	0.923362	0.382502	-1.41071
Ccz1	-1.12371	0.0237485	-0.202272	1.30223
CD98hc	-1.24317	-0.234291	1.13128	0.346176
Cda5	-0.5	-0.5	-0.5	1.5
CDase	0	0	0	0
cdc14	-0.802534	-0.802534	0.342233	1.26284
Cdc16	-0.5	-0.5	-0.5	1.5
Cdc23	1.49869	-0.529086	-0.529086	-0.440521
Cdc27	-1.12335	-0.114595	-0.0733716	1.31132
Cdc37	-1.46529	0.272868	0.779943	0.412484
Cdc42	1.0411	0.642502	-0.634361	-1.04924
CDC45L	-0.970332	0.457161	1.18335	-0.67018
Cdc5	-0.687893	1.43194	-0.687893	-0.0561557
CDC50	-0.779514	1.45237	-0.168165	-0.504688
Cdc6	-0.861247	0.989732	-0.861247	0.732761
Cdep	1.33977	-0.152184	-1.08199	-0.105604
CdGAPr	-0.65452	-0.147482	-0.65452	1.45652
cdi	-0.86107	0.991902	-0.86107	0.730238
Cdk1	-0.554095	1.49535	-0.554095	-0.387158
Cdk12	-0.772848	0.220208	-0.772848	1.32549
Cdk2	-0.507056	-0.507056	1.49992	-0.485814
CDK2AP1	-1.21031	1.0184	0.585645	-0.393731
Cdk4	-1.38317	-0.0364878	0.512594	0.907062
Cdk5	-0.993411	-0.679017	1.11331	0.559117
Cdk5alpha	0	0	0	0
Cdk7	-1.0257	1.36853	-0.261663	-0.0811734
Cdk8	-0.5	-0.5	-0.5	1.5
Cdk9	-0.801855	1.26452	-0.801855	0.339192
Cdlc2	-0.5	-0.5	-0.5	1.5
cdm	1.28538	0.299138	-0.83077	-0.753748
Cec2	-0.5	-0.5	-0.5	1.5
CecA1	-1.06062	-0.0655122	1.34942	-0.223288
CecA2	-0.959558	-0.313235	1.40162	-0.128826
CecB	-0.777196	1.45741	-0.197693	-0.482525
CecC	-0.829743	1.34475	0.172932	-0.687942
Ced-12	-1.48521	0.414327	0.692104	0.37878
ced-6	-1.26043	1.17204	-0.0856749	0.174064
Cen	-0.737095	1.47641	-0.412228	-0.327083
CenB1A	-1.08382	-0.529074	0.456656	1.15624
CenG1A	-0.5	-0.5	-0.5	1.5
Cenp-C	1.49221	-0.355047	-0.586862	-0.550304
Cep135	-0.733452	1.38468	-0.733452	0.0822245
cep290	0	0	0	0
Cep89	0	0	0	0
Cep97	-0.5	-0.5	-0.5	1.5
cer	-0.536708	0.161351	-0.955882	1.33124
Cerk	-1.3592	1.05097	0.137741	0.17049
cert	-1.19844	0.0123999	-0.0628088	1.24885
cerv	-0.735253	-0.735253	1.38241	0.0881002
Cf2	-0.873422	-0.21254	-0.352089	1.43805
Cfp1	1.46961	-0.27941	-0.759229	-0.430973
cg	-0.822746	-0.822746	0.440414	1.20508
CG10005	0	0	0	0
CG10011	-0.790678	1.29034	-0.790678	0.29102
CG10026	-0.5	-0.5	-0.5	1.5
CG10031	-0.5	-0.5	-0.5	1.5
CG10038	-1.48738	0.496269	0.337024	0.654088
CG10041	0	0	0	0
CG10050	-0.5	-0.5	-0.5	1.5
CG10053	-0.5	-0.5	-0.5	1.5
CG10055	-1.26075	-0.309961	0.986425	0.584289
CG10063	-0.5	-0.5	-0.5	1.5
CG10068	1.38951	-0.0176461	-0.938872	-0.432989
CG10075	-1.3044	0.0581859	0.113868	1.13234
CG10077	0.0295101	1.39047	-0.87965	-0.540325
CG10082	1.37125	0.0652343	-0.922792	-0.51369
CG10086	0	0	0	0
CG10096	0	0	0	0
CG10098	1.41451	-0.852038	-0.521024	-0.0414504
CG10103	-0.0995054	0.466769	-1.34656	0.979292
CG10126	-0.756983	0.172061	-0.762599	1.34752
CG10132	-0.5	-0.5	-0.5	1.5
CG10137	-0.5	-0.5	-0.5	1.5
CG10139	-0.818515	-0.818515	1.2186	0.418431
CG10147	-0.6311	1.4698	-0.6311	-0.207604
CG10165	1.13747	-0.892282	0.540704	-0.785894
CG10166	-1.28552	0.445857	1.05076	-0.211095
CG10171	-0.752768	1.35831	-0.752768	0.147225
CG10184	-0.5	-0.5	-0.5	1.5
CG10188	-0.793388	1.28438	-0.793388	0.302398
CG10189	-0.5	-0.5	-0.5	1.5
CG10194	-0.631373	-0.631373	1.46967	-0.206921
CG10195	-0.96129	0.286061	1.27733	-0.6021
CG10208	-0.631804	1.46945	-0.631804	-0.205841
CG10209	-0.5	-0.5	-0.5	1.5
CG10214	-0.769994	1.33055	-0.769994	0.209441
CG10222	-0.5	-0.5	-0.5	1.5
CG10232	-0.747576	-0.406676	-0.319979	1.47423
CG1024	-0.5	-0.5	-0.5	1.5
CG10252	0	0	0	0
CG10254	-1.10038	1.20218	-0.462452	0.360645
CG10265	-0.5	-0.5	-0.5	1.5
CG10268	-0.5	-0.5	-0.5	1.5
CG10274	-0.5	-0.5	-0.5	1.5
CG10283	-0.5	-0.5	-0.5	1.5
CG10286	1.4681	-0.487466	-0.74154	-0.239097
CG10311	0	0	0	0
CG10321	-1.16974	-0.0106124	1.27391	-0.0935521
CG10324	-0.77225	0.217939	-0.77225	1.32656
CG10333	-1.40272	0.293275	0.147946	0.961499
CG10336	-0.5	1.5	-0.5	-0.5
CG10337	-1.38072	0.570399	-0.0638445	0.874169
CG10338	-0.73836	-0.73836	1.3784	0.0983206
CG10340	-1.08828	-0.15251	1.33545	-0.0946591
CG10341	-0.5	-0.5	-0.5	1.5
CG10343	-0.689495	-0.689495	-0.0515809	1.43057
CG10344	-0.5	-0.5	-0.5	1.5
CG10347	1.46358	-0.208429	-0.743267	-0.511889
CG10353	1.48693	-0.466436	-0.669579	-0.350915
CG10359	-0.619505	-0.619505	-0.236314	1.47532
CG10365	-0.5	1.5	-0.5	-0.5
CG10366	-0.5	-0.5	-0.5	1.5
CG10375	-1.07697	1.25593	-0.440743	0.261776
CG10376	-1.31638	0.162225	1.11317	0.040981
CG10383	-1.15991	-0.0843589	1.28296	-0.0386916
CG10395	-1.216	0.574111	-0.381103	1.02299
CG10405	0	0	0	0
CG10407	-0.602369	1.48231	-0.602369	-0.277576
CG10413	-1.04263	1.28831	-0.456748	0.211064
CG10417	-1.42979	0.52561	0.819962	0.0842199
CG10418	1.48917	-0.545814	-0.612239	-0.331112
CG10425	-0.713435	1.08852	0.598521	-0.973606
CG10428	-0.864165	-0.864165	0.783928	0.944402
CG10431	0.74928	0.974399	-0.819461	-0.904218
CG10433	-0.533169	-0.431953	-0.533169	1.49829
CG10435	-0.998827	1.31945	-0.484354	0.163736
CG10444	-1.21271	0.507871	-0.362772	1.06761
CG10445	-0.724102	1.39593	-0.724102	0.0522737
CG10462	-0.5	-0.5	-0.5	1.5
CG10463	-0.5	-0.5	-0.5	1.5
CG10465	0.718037	-0.0292719	-1.40419	0.715421
CG10466	-0.839433	-0.839433	1.1406	0.538262
CG10467	-0.59235	1.48579	-0.59235	-0.301095
CG10469	-0.562614	1.49371	-0.562614	-0.368477
CG10470	-1.08745	1.32217	-0.261899	0.0271755
CG10472	0	0	0	0
CG10492	-0.537501	-0.537501	1.49781	-0.422803
CG10494	-0.5	-0.5	-0.5	1.5
CG10495	-0.59205	1.48589	-0.59205	-0.301792
CG10505	0	0	0	0
CG10508	0	0	0	0
CG10512	1.35031	-0.282723	-0.0205483	-1.04704
CG10516	-0.858876	-0.858876	1.01593	0.701826
CG10527	1.2419	-0.962996	0.356238	-0.635145
CG10543	-0.865449	0.910111	-0.865449	0.820788
CG10550	0	0	0	0
CG10555	-0.86013	0.71747	-0.86013	1.00279
CG10561	-0.5	-0.5	-0.5	1.5
CG10565	-1.12331	0.574847	1.06711	-0.51865
CG10576	-1.19889	1.15841	0.351846	-0.311362
CG10581	-0.852873	0.640232	-0.852873	1.06551
CG10584	-1.03434	-0.321244	1.35164	0.00394483
CG10589	-0.5	-0.5	-0.5	1.5
CG10600	-1.12668	1.01141	-0.534403	0.649673
CG10616	1.47832	-0.341475	-0.72931	-0.407531
CG10621	-0.532645	-0.433057	-0.532645	1.49835
CG10623	-0.819508	0.423509	-0.819508	1.21551
CG10628	1.47777	-0.254445	-0.651641	-0.571683
CG10631	-0.551881	1.49573	-0.551881	-0.391969
CG10638	0.896647	0.795584	-1.10229	-0.589944
CG10646	-1.12695	1.28569	-0.258822	0.100081
CG10654	-0.5	-0.5	-0.5	1.5
CG10660	-0.580965	1.48924	-0.580965	-0.327307
CG10663	0	0	0	0
CG10669	-0.5	-0.5	-0.5	1.5
CG10672	-1.39487	0.31058	0.111997	0.972288
CG10674	-1.09088	-0.0131543	1.32673	-0.222694
CG10681	-1.17205	1.19089	-0.331833	0.313001
CG10702	-0.5	-0.5	-0.5	1.5
CG10731	-0.822686	1.20528	-0.822686	0.440097
CG10734	0	0	0	0
CG10737	1.36322	0.110988	-0.591019	-0.883186
CG1074	-0.54719	1.49649	-0.54719	-0.402108
CG10747	-0.5	-0.5	-0.5	1.5
CG10764	-1.06326	1.32771	0.0571006	-0.321558
CG1077	0	0	0	0
CG10778	-1.24051	0.674452	0.933426	-0.367364
CG10795	-0.6599	-0.6599	-0.133234	1.45304
CG10799	-0.5	-0.5	-0.5	1.5
CG10801	-0.5	-0.5	-0.5	1.5
CG10802	-0.5	-0.5	-0.5	1.5
CG10803	-0.683276	-0.0692306	-0.683276	1.43578
CG10809	-0.5	-0.5	-0.5	1.5
CG10841	0	0	0	0
CG10859	1.2314	0.397092	-0.814243	-0.814243
CG10863	-0.837552	-0.693038	1.334	0.196589
CG10866	-0.5	-0.5	-0.5	1.5
CG10874	-1.38399	-0.0832837	0.757927	0.709349
CG10877	-0.515255	1.49965	-0.515255	-0.469136
CG10889	-0.562161	1.4938	-0.562161	-0.369478
CG10898	-1.05538	1.32623	0.0774365	-0.348283
CG1090	0	0	0	0
CG10903	-0.790394	1.29095	-0.790394	0.28984
CG10904	-0.5	-0.5	-0.5	1.5
CG10907	-0.861959	-0.861959	0.980502	0.743417
CG10914	-0.636269	1.46713	-0.636269	-0.194587
CG10916	1.36584	-0.25858	-1.0304	-0.0768552
CG1092	1.10421	0.582737	-0.747991	-0.938958
CG10927	-0.5	-0.5	-0.5	1.5
CG10932	-0.68074	-0.287035	1.48036	-0.512584
CG10947	-0.726373	-0.726373	0.0594652	1.39328
CG10948	-0.760945	1.34569	-0.760945	0.176199
CG10949	-0.5842	1.48831	-0.5842	-0.319912
CG10958	-0.5	-0.5	-0.5	1.5
CG10959	-0.5	-0.5	-0.5	1.5
CG10960	-1.07364	-0.0104368	1.33563	-0.25155
CG10962	-0.5	1.5	-0.5	-0.5
CG10970	-0.5	1.5	-0.5	-0.5
CG10973	-0.694238	-0.694238	1.4264	-0.0379294
CG10979	-0.792531	1.28628	-0.792531	0.29878
CG10984	-0.85776	1.02656	-0.85776	0.688959
CG11000	-0.625379	-0.625379	1.47261	-0.221853
CG11007	1.41246	-0.128976	-0.354813	-0.928671
CG1103	0.275295	1.09892	-1.30854	-0.0656702
CG11030	-0.740265	1.37589	-0.740265	0.104642
CG11034	-0.538454	-0.538454	1.49769	-0.420783
CG11035	-0.5	-0.5	-0.5	1.5
CG1105	-1.22549	-0.258781	1.14815	0.336122
CG11050	-1.22312	-0.189199	0.220953	1.19137
CG11052	0	0	0	0
CG11070	-1.07435	0.0995359	1.31225	-0.337438
CG11076	-0.865955	-0.865955	0.850374	0.881537
CG11077	1.20403	0.407709	-0.59943	-1.01231
CG11089	-1.22896	1.17136	-0.211949	0.269545
CG11095	1.49332	-0.379598	-0.61031	-0.503413
CG11103	-0.838164	1.14632	-0.838164	0.530007
CG11106	0	0	0	0
CG11109	-0.5	-0.5	-0.5	1.5
CG11110	-1.16401	-0.0539734	-0.0619787	1.27997
CG11122	1.22067	-0.302353	0.246856	-1.16517
CG11123	-0.675247	1.44211	-0.675247	-0.0916186
CG11125	-0.5	1.5	-0.5	-0.5
CG11127	-1.34867	0.153969	1.06838	0.126319
CG11134	-1.39183	0.843583	-0.0428174	0.591061
CG11137	0.22721	-0.352208	1.2492	-1.1242
CG11141	-1.45418	0.70126	0.611154	0.141762
CG11151	-1.16194	1.2536	-0.238423	0.146757
CG11155	-0.684487	-0.065817	-0.684487	1.43479
CG11158	-0.775709	1.32027	-0.775709	0.231146
CG1116	-0.843077	0.562998	-0.843077	1.12315
CG11164	-0.707376	-0.0474244	1.42919	-0.674385
CG11168	-0.5	-0.5	-0.5	1.5
CG11170	-1.17859	1.25271	0.102419	-0.176539
CG11178	-0.864587	-0.864587	0.935136	0.794039
CG11180	-0.609091	-0.609091	1.47973	-0.26155
CG11200	-0.5	-0.5	-0.5	1.5
CG11236	0	0	0	0
CG11241	0	0	0	0
CG11247	-0.819633	-0.819633	1.21511	0.424152
CG11248	-0.792254	-0.792254	1.28689	0.297614
CG11249	0	0	0	0
CG11257	-0.862617	0.754071	-0.862617	0.971164
CG11267	1.28069	0.0281896	-0.153206	-1.15567
CG11279	-1.11706	1.28642	-0.288359	0.119003
CG1129	-1.47357	0.408294	0.749982	0.315295
CG11307	-0.855344	-0.855344	1.04711	0.663576
CG11309	-1.29987	0.965316	-0.23431	0.568863
CG11313	0	0	0	0
CG11318	0	0	0	0
CG11334	1.37625	-0.276655	-1.01069	-0.0889058
CG11342	-0.5	-0.5	-0.5	1.5
CG11350	0	0	0	0
CG11353	-0.5	-0.5	-0.5	1.5
CG11357	1.30675	-0.242293	0.0453405	-1.1098
CG1136	0	0	0	0
CG11360	-0.74046	1.37563	-0.74046	0.105294
CG11362	0	0	0	0
CG11367	-0.5	-0.5	-0.5	1.5
CG11374	-0.5	-0.5	-0.5	1.5
CG11377	-1.02177	1.30745	-0.463587	0.177902
CG11378	0	0	0	0
CG11396	-1.14368	-0.529944	0.909837	0.763782
CG11398	-0.827447	-0.827447	1.18892	0.465976
CG11399	-0.5	-0.5	-0.5	1.5
CG11400	-0.5	-0.5	-0.5	1.5
CG11403	1.49832	-0.532909	-0.532909	-0.432502
CG11406	0	0	0	0
CG11413	-0.5	-0.5	-0.5	1.5
CG11414	-0.865997	0.856151	-0.865997	0.875844
CG11417	-1.06471	1.22625	0.337356	-0.498898
CG1142	1.49251	-0.483021	-0.626319	-0.383173
CG11426	-0.770542	-0.770542	0.211499	1.32959
CG1143	-0.5	-0.5	-0.5	1.5
CG11436	-0.72664	1.39296	-0.72664	0.0603166
CG11444	0.88333	-1.04308	0.827856	-0.668103
CG11447	-0.736783	-0.736783	0.0931191	1.38045
CG11454	-1.15766	-0.492705	0.659001	0.99136
CG11456	-0.5	-0.5	-0.5	1.5
CG1146	-0.521766	1.49927	-0.521766	-0.455741
CG11474	-0.686043	-0.686043	-0.0614114	1.4335
CG11475	-0.568905	1.49232	-0.568905	-0.354509
CG11486	1.24828	-0.699911	-0.907259	0.35889
CG11504	-0.5	-0.5	-0.5	1.5
CG11523	-1.05494	1.24224	-0.497629	0.310338
CG11537	-0.935223	-0.711716	1.18583	0.461109
CG11539	-0.774721	-0.774721	1.32209	0.227349
CG11555	-1.02241	1.3325	-0.411032	0.100945
CG11560	-0.5	-0.5	-0.5	1.5
CG11562	1.2433	0.375623	-0.846048	-0.77287
CG11563	-0.629383	1.47066	-0.629383	-0.211899
CG11583	-0.776586	-0.428382	1.46487	-0.259905
CG11586	-1.48704	0.566133	0.609036	0.311876
CG11590	-0.5	-0.5	-0.5	1.5
CG11593	-0.757368	1.35133	-0.757368	0.163409
CG11594	0	0	0	0
CG11596	-1.15732	0.65834	-0.493048	0.992024
CG11597	0	0	0	0
CG11601	-0.809658	1.24429	-0.809658	0.375021
CG1161	-1.41957	0.92873	0.215146	0.27569
CG11619	-0.5	-0.5	-0.5	1.5
CG11638	-0.5	-0.5	-0.5	1.5
CG11655	1.48565	-0.301433	-0.611823	-0.572399
CG11658	-0.5	-0.5	-0.5	1.5
CG11679	-0.817439	-0.817439	1.2219	0.412981
CG11686	-1.37962	-0.0102729	0.439355	0.950536
CG11695	-0.557238	-0.557238	1.49477	-0.380297
CG11696	-0.5	-0.5	-0.5	1.5
CG11699	-1.40018	0.407858	0.0598182	0.932505
CG11700	-0.5	-0.5	-0.5	1.5
CG11710	-0.695649	-0.695649	1.42513	-0.0338332
CG1172	-1.38607	-0.00223894	0.934037	0.454276
CG11722	-0.569456	-0.569456	1.49219	-0.353279
CG11723	-1.25264	0.30541	1.14032	-0.193087
CG11737	1.30235	-0.903228	-0.651449	0.252323
CG11752	-0.191811	-0.15964	1.37488	-1.02343
CG11753	-1.03323	-0.0861432	1.36545	-0.246084
CG11755	-0.61656	1.47662	-0.61656	-0.243502
CG11771	-1.28651	1.09444	0.349668	-0.157597
CG11777	1.32264	-0.345214	-1.06045	0.0830193
CG11779	1.33717	-0.884463	-0.630853	0.178151
CG11781	-1.32741	1.02684	0.413362	-0.112793
CG11786	0	0	0	0
CG11788	-0.568257	1.49247	-0.568257	-0.355956
CG11790	-1.06477	0.919563	0.78328	-0.638071
CG11791	-1.32395	0.0565067	1.10317	0.164271
CG11807	-1.21014	-0.313221	0.389436	1.13393
CG11808	-1.24896	-0.365616	0.76853	0.846044
CG11811	-1.02217	-0.185756	-0.167756	1.37569
CG11825	0	0	0	0
CG11836	0	0	0	0
CG11837	-0.647027	1.4611	-0.647027	-0.167044
CG11839	-0.788949	-0.788949	1.29404	0.283856
CG11857	-0.481834	-0.000282868	1.3925	-0.910379
CG11858	-1.35798	1.02277	0.331373	0.00383881
CG11873	-1.21357	-0.206424	1.19807	0.221926
CG11882	-0.739008	1.37755	-0.739008	0.100469
CG11883	0	0	0	0
CG11885	-0.858394	0.696165	-0.858394	1.02062
CG11893	-1.30516	0.983778	0.532916	-0.211537
CG11899	-0.709331	0.00669249	-0.709331	1.41197
CG11902	-0.5	-0.5	-0.5	1.5
CG11906	-0.852757	1.06633	-0.852757	0.639186
CG11911	0	0	0	0
CG11920	-0.831716	-0.831716	1.17303	0.4904
CG11927	-0.84571	1.10943	-0.84571	0.58199
CG11961	-0.673757	-0.673757	1.44324	-0.0957258
CG11964	1.40816	-0.928744	-0.098998	-0.380419
CG11970	-0.656748	1.4551	-0.656748	-0.141603
CG11975	-0.852928	-0.852928	1.06513	0.640727
CG11980	1.35785	0.142903	-0.82002	-0.680731
CG11983	0	0	0	0
CG11986	-0.630269	1.47022	-0.630269	-0.209685
CG11999	1.39479	-0.594382	0.0362347	-0.83664
CG12004	1.33561	-0.181939	-1.08554	-0.0681261
CG12007	-1.38699	0.690263	-0.0741859	0.77091
CG12010	-0.5	-0.5	-0.5	1.5
CG12012	-0.243606	-0.899213	-0.288547	1.43137
CG12024	-1.27733	-0.226941	1.05669	0.447585
CG12025	1.09453	-0.61296	-1.05021	0.568642
CG12054	1.42895	-0.0474814	-0.719122	-0.662348
CG12056	-0.543558	1.49702	-0.543558	-0.409904
CG12065	-1.02688	1.36024	-0.307558	-0.0258022
CG12071	-0.701861	-0.701861	1.41934	-0.015622
CG12075	-0.5	-0.5	-0.5	1.5
CG1208	-0.78681	-0.78681	0.275087	1.29853
CG12081	1.49391	-0.391699	-0.490351	-0.611857
CG12084	1.30421	0.263478	-0.803539	-0.764153
CG12091	-1.2648	0.161834	1.17029	-0.067322
CG12093	-1.10987	0.250371	-0.387608	1.2471
CG12096	-1.20433	0.172055	1.2187	-0.186427
CG12099	-1.27652	1.13079	-0.128613	0.27435
CG12104	1.34742	-0.0268955	-1.05513	-0.265402
CG12105	-0.5	-0.5	-0.5	1.5
CG12106	-0.5	-0.5	-0.5	1.5
CG12107	1.41624	-0.839417	-0.0401207	-0.536698
CG12112	-1.15423	-0.497894	0.992023	0.660105
CG12116	-0.5	-0.5	-0.5	1.5
CG12118	-0.865357	-0.865357	0.81726	0.913455
CG12121	1.48247	-0.692197	-0.468921	-0.321349
CG12123	-1.16765	0.411994	1.14638	-0.390718
CG12128	-0.5	-0.5	1.5	-0.5
CG12129	-1.36361	0.170405	1.04363	0.149576
CG1213	-0.5	-0.5	-0.5	1.5
CG12133	-0.521205	-0.521205	1.49931	-0.456901
CG12134	-0.5	-0.5	-0.5	1.5
CG12155	-0.907768	-0.153281	1.42203	-0.360977
CG12159	-1.32269	-0.18635	0.950936	0.558105
CG12163	1.37306	-1.02661	-0.153758	-0.192689
CG12170	-0.760045	-0.760045	0.172966	1.34712
CG12171	0.772379	0.723907	-0.13172	-1.36457
CG12173	-1.1737	0.0695617	1.26201	-0.157879
CG12177	-0.865705	0.898993	-0.865705	0.832418
CG12179	-0.598994	1.48353	-0.598994	-0.285546
CG1218	-0.5	-0.5	-0.5	1.5
CG12182	-0.5	-0.5	-0.5	1.5
CG12184	0	0	0	0
CG12204	-0.724478	1.39549	-0.724478	0.0534628
CG12209	0	0	0	0
CG12213	-0.855971	1.40402	-0.544082	-0.00396703
CG12219	-0.81284	1.23543	-0.81284	0.390251
CG12224	-0.5	-0.5	-0.5	1.5
CG12236	-0.55859	1.49451	-0.55859	-0.377334
CG12237	1.35678	0.149812	-0.783208	-0.723385
CG12241	-1.02259	1.05922	0.626552	-0.663183
CG12253	-0.5	-0.5	-0.5	1.5
CG12259	1.4889	-0.421423	-0.667594	-0.399881
CG12267	-0.813181	1.23446	-0.813181	0.391905
CG1227	-1.48299	0.387732	0.70671	0.388547
CG12279	-1.23858	1.09753	0.425071	-0.284017
CG12288	-0.5	-0.5	-0.5	1.5
CG12290	-0.703555	1.4285	-0.0449559	-0.679987
CG12299	-0.5	-0.5	-0.5	1.5
CG12301	-0.680144	1.43831	-0.680144	-0.0780169
CG12316	-0.5	-0.5	-0.5	1.5
CG12320	-0.737974	1.3789	-0.737974	0.097045
CG12321	-1.37894	0.0986378	0.273271	1.00703
CG12325	1.5	-0.5	-0.5	-0.5
CG1233	-0.752168	1.3592	-0.752168	0.145137
CG12333	-0.73315	1.38506	-0.73315	0.0812423
CG12338	-0.732569	-0.732569	1.38578	0.0793564
CG1234	1.49895	-0.446808	-0.528251	-0.523891
CG12341	1.29281	-1.13249	-0.209119	0.0488079
CG12343	-1.46038	0.401107	0.260047	0.79923
CG12344	1.5	-0.5	-0.5	-0.5
CG1236	-1.20124	0.186657	1.21704	-0.202451
CG12375	-0.878151	1.40116	-0.515308	-0.00770181
CG12379	-0.589762	1.48662	-0.589762	-0.307101
CG12384	-1.02553	-0.686443	0.779581	0.932388
CG1239	-0.835353	-0.835353	0.512289	1.15842
CG12391	-0.714853	-0.714853	0.0234988	1.40621
CG12446	0	0	0	0
CG1246	-0.5	-0.5	-0.5	1.5
CG12470	-0.5	-0.5	-0.5	1.5
CG12493	0	0	0	0
CG12499	1.49877	-0.528234	-0.528234	-0.442301
CG12512	-0.5	-0.5	-0.5	1.5
CG12519	0	0	0	0
CG12535	1.44649	-0.283929	-0.306239	-0.856318
CG12541	0	0	0	0
CG12547	-1.22191	-0.412957	0.81944	0.815427
CG12560	-0.519247	1.49943	-0.519247	-0.460939
CG12567	-1.34096	1.07862	0.175778	0.0865666
CG12576	-1.48223	0.69725	0.32639	0.458591
CG12592	1.47847	-0.25409	-0.612192	-0.612192
CG12605	-0.5	-0.5	-0.5	1.5
CG12608	-1.12566	0.0358894	-0.209377	1.29914
CG12643	1.5	-0.5	-0.5	-0.5
CG1265	-0.883977	-0.482706	-0.0418027	1.40849
CG12655	-0.720032	-0.720032	0.0395126	1.40055
CG12659	-0.993421	1.37027	-0.00890965	-0.367943
CG12674	1.5	-0.5	-0.5	-0.5
CG12699	0	0	0	0
CG12702	1.49645	-0.401537	-0.547455	-0.547455
CG1271	-0.861172	0.990652	-0.861172	0.731692
CG12713	-0.5	-0.5	-0.5	1.5
CG12717	-0.5	-0.5	-0.5	1.5
CG12725	0	0	0	0
CG12728	-0.5	-0.5	-0.5	1.5
CG12730	-1.41456	0.917526	0.118797	0.378235
CG12744	-0.5	-0.5	-0.5	1.5
CG12746	1.48302	-0.377098	-0.399828	-0.706097
CG1275	1.30839	0.221318	-0.950747	-0.578966
CG12766	0	0	0	0
CG12768	-0.5	-0.5	-0.5	1.5
CG12773	1.37417	-0.166017	-0.183196	-1.02496
CG12795	0.992584	-1.12598	0.674171	-0.540771
CG12811	1.36204	-0.950051	-0.486516	0.0745263
CG12818	-0.714514	-0.714514	1.40657	0.0224596
CG12822	-1.30798	0.45076	1.02802	-0.170798
CG12824	0	0	0	0
CG12825	-0.5	-0.5	-0.5	1.5
CG12836	0	0	0	0
CG12848	1.39688	-0.788274	0.0436697	-0.652271
CG12853	0	0	0	0
CG12860	0	0	0	0
CG12861	0	0	0	0
CG12863	-0.5	-0.5	-0.5	1.5
CG12868	-0.676528	-0.0880771	-0.676528	1.44113
CG12869	-0.5	-0.5	-0.5	1.5
CG12877	-0.5	-0.5	-0.5	1.5
CG12880	0	0	0	0
CG12883	-1.39701	0.176698	0.241008	0.979308
CG12895	-1.39323	-0.0558565	0.778701	0.670385
CG12896	-0.863384	0.767809	-0.863384	0.95896
CG12909	0	0	0	0
CG12910	-0.5	-0.5	-0.5	1.5
CG12913	0	0	0	0
CG12920	0	0	0	0
CG12926	1.5	-0.5	-0.5	-0.5
CG12929	-1.09886	-0.538617	1.10311	0.534364
CG12934	1.3463	0.174825	-0.760563	-0.760563
CG12935	-0.769574	1.33128	-0.769574	0.207871
CG12942	-0.5	-0.5	-0.5	1.5
CG12945	-1.03676	-0.61242	1.13296	0.516222
CG12947	-0.773645	-0.773645	1.32405	0.22324
CG12948	-0.843433	-0.843433	1.12136	0.565511
CG12963	0	0	0	0
CG12971	0	0	0	0
CG12974	0	0	0	0
CG12975	-1.46896	0.614614	0.204201	0.650149
CG12990	0	0	0	0
CG12991	-0.891145	-0.393594	-0.140467	1.42521
CG12992	-0.5	-0.5	-0.5	1.5
CG13001	-0.806831	1.25186	-0.806831	0.361804
CG13004	-0.5	-0.5	-0.5	1.5
CG13005	-0.5	-0.5	-0.5	1.5
CG13010	-0.5	-0.5	-0.5	1.5
CG13012	-0.5	-0.5	1.5	-0.5
CG13014	-0.827219	-0.827219	0.464704	1.18973
CG13016	-0.674489	1.44269	-0.674489	-0.0937102
CG13018	-1.01662	1.34006	0.0816165	-0.405049
CG13025	0	0	0	0
CG1307	1.02579	0.474559	-0.203815	-1.29654
CG13074	0	0	0	0
CG13077	0	0	0	0
CG13085	-0.5	-0.5	-0.5	1.5
CG13086	-1.05278	1.03037	-0.632893	0.655306
CG13088	-0.5	-0.5	-0.5	1.5
CG1309	-1.26095	0.0683482	1.18545	0.00715777
CG13096	-0.942956	0.231363	1.30557	-0.593972
CG13097	-0.572785	1.49139	-0.572785	-0.345819
CG13102	-0.5	-0.5	-0.5	1.5
CG13116	-0.813015	-0.813015	0.391099	1.23493
CG13117	-0.0461953	-1.27257	0.154961	1.1638
CG13123	-0.653077	-0.653077	1.45743	-0.151274
CG13124	0.182752	-1.35492	0.115013	1.05715
CG13126	-0.645256	-0.645256	1.46213	-0.171621
CG13127	0	0	0	0
CG13144	1.5	-0.5	-0.5	-0.5
CG13151	-0.5	-0.5	-0.5	1.5
CG13155	0	0	0	0
CG13159	0	0	0	0
CG1316	-0.924947	1.25342	-0.673879	0.345409
CG13160	0	0	0	0
CG13168	0	0	0	0
CG1317	1.38122	0.0911165	-0.730618	-0.741714
CG13185	-0.511914	1.49978	-0.511914	-0.475957
CG13192	-0.824215	-0.824215	0.448262	1.20017
CG13197	-1.21957	-0.358172	1.0532	0.524545
CG13204	0	0	0	0
CG13220	1.25452	-1.03897	0.294405	-0.509954
CG13229	0	0	0	0
CG1324	0	0	0	0
CG13244	0	0	0	0
CG13248	0	0	0	0
CG13252	-0.5	-0.5	-0.5	1.5
CG13255	0	0	0	0
CG13295	-0.994762	1.38925	-0.233461	-0.161028
CG13314	-0.810827	1.24108	-0.810827	0.380575
CG13315	-1.15486	0.236865	1.22998	-0.311993
CG13319	1.45732	-0.160417	-0.717334	-0.579572
CG13321	-0.5	-0.5	-0.5	1.5
CG13339	-0.768417	0.203554	-0.768417	1.33328
CG13344	-0.84738	0.0223331	1.39769	-0.57264
CG13358	0	0	0	0
CG13360	0	0	0	0
CG13364	-0.00935078	0.896556	0.505749	-1.39295
CG13365	1.38943	0.0285505	-0.531057	-0.886926
CG13366	-0.5	-0.5	-0.5	1.5
CG13367	-0.860018	-0.860018	0.716009	1.00403
CG13369	-1.35534	1.05522	0.197601	0.102518
CG13373	-1.07441	0.837713	0.865298	-0.628601
CG13375	-0.5	-0.5	-0.5	1.5
CG13377	1.29578	0.280476	-0.788127	-0.788127
CG13384	0.400918	1.09136	-1.26322	-0.229063
CG13390	-1.14581	1.27245	0.109836	-0.23648
CG13392	-0.863768	0.952137	-0.863768	0.775399
CG13397	-0.51622	1.4996	-0.51622	-0.467159
CG13398	-0.980107	-0.121824	-0.290884	1.39282
CG13405	0	0	0	0
CG13409	0	0	0	0
CG13436	0	0	0	0
CG1344	1.30813	0.0881216	-1.08946	-0.306785
CG13482	-0.8634	-0.8634	0.958692	0.768108
CG13484	-0.5	-0.5	-0.5	1.5
CG13488	-0.5	-0.5	-0.5	1.5
CG13506	-0.5	-0.5	-0.5	1.5
CG13516	-0.5	-0.5	-0.5	1.5
CG13531	-0.78129	1.30966	-0.78129	0.252922
CG1354	0.200514	0.331967	0.897337	-1.42982
CG13551	-0.272799	-0.152859	1.3985	-0.97284
CG13559	-0.569402	-0.569402	1.4922	-0.3534
CG13562	-0.5	-0.5	1.5	-0.5
CG13563	-0.5	-0.5	-0.5	1.5
CG1358	0	0	0	0
CG13585	0.256845	0.00329646	-1.33427	1.07413
CG13599	-0.521752	1.49927	-0.521752	-0.455771
CG1360	-0.5	-0.5	-0.5	1.5
CG13601	1.26547	0.332068	-0.720514	-0.877025
CG13603	-1.32464	0.740923	-0.220985	0.804698
CG13604	1.49909	-0.524289	-0.524289	-0.450515
CG13605	-1.11502	1.18455	0.384253	-0.45378
CG13609	-0.599308	-0.599308	1.48342	-0.284807
CG13623	1.4906	-0.540966	-0.343349	-0.606284
CG13625	-1.09742	-0.255201	1.31496	0.0376554
CG13630	1.35104	0.0919813	-0.471413	-0.971603
CG13631	-0.733268	0.242939	1.3136	-0.823266
CG13654	1.37268	-0.551339	0.0763955	-0.897739
CG13663	-0.763973	0.18718	-0.763973	1.34077
CG13667	-0.5	1.5	-0.5	-0.5
CG13671	-0.541384	1.49732	-0.541384	-0.414548
CG13676	1.5	-0.5	-0.5	-0.5
CG13689	-1.10401	-0.107092	-0.114282	1.32538
CG13690	-0.5	-0.5	-0.5	1.5
CG13692	0	0	0	0
CG13707	-0.5	-0.5	-0.5	1.5
CG1371	0.666621	0.86605	-0.204625	-1.32804
CG13739	0	0	0	0
CG13741	0	0	0	0
CG13742	-0.529046	1.4987	-0.529046	-0.440604
CG13743	0	0	0	0
CG13751	-0.559703	1.49256	-0.575686	-0.357173
CG13760	-0.713695	1.40744	-0.713695	0.0199531
CG13766	-0.733565	1.38454	-0.733565	0.0825919
CG13773	-0.861642	0.984708	-0.861642	0.738577
CG13775	-0.5	-0.5	-0.5	1.5
CG13784	-0.5	-0.5	-0.5	1.5
CG13807	-1.15354	-0.34975	1.20831	0.294979
CG13813	0	0	0	0
CG13827	-0.813549	1.2334	-0.813549	0.393696
CG13850	-0.832616	-0.832616	1.16952	0.495714
CG13868	-1.11011	-0.57935	0.795389	0.894071
CG13876	-0.5	-0.5	-0.5	1.5
CG13877	0	0	0	0
CG13887	-0.688788	-0.0590921	1.43281	-0.684932
CG13893	1.10157	-0.103658	-1.2983	0.300386
CG13895	-0.596102	-0.596102	1.48454	-0.292337
CG13896	-0.879658	-0.424511	1.42525	-0.121079
CG13898	0	0	0	0
CG13901	-0.5	-0.5	-0.5	1.5
CG13907	1.08884	0.143905	-1.33536	0.102622
CG13917	1.28765	-0.0370707	-1.15378	-0.0968053
CG13919	-1.25162	-0.261547	1.0884	0.424769
CG13920	1.47763	-0.614211	-0.614211	-0.249206
CG13921	0	0	0	0
CG13926	-0.841285	0.550635	-0.841285	1.13194
CG13928	0	0	0	0
CG13933	-0.864146	0.783504	-0.864146	0.944788
CG13937	-0.848745	-0.211593	1.44469	-0.384353
CG1394	-0.5	-0.5	-0.5	1.5
CG13982	0	0	0	0
CG13992	-0.5	-0.5	-0.5	1.5
CG13994	-0.809287	0.373274	-0.809287	1.2453
CG14005	-0.5	-0.5	-0.5	1.5
CG14024	-0.5	-0.5	-0.5	1.5
CG14036	-0.5	-0.5	-0.5	1.5
CG14043	-0.766694	1.33622	-0.766694	0.197169
CG14050	-0.5	-0.5	-0.5	1.5
CG14057	-0.767657	0.200729	-0.767657	1.33458
CG1407	-1.48763	0.597593	0.574952	0.315082
CG14072	-0.5	-0.5	-0.5	1.5
CG14073	1.04868	-0.734838	-0.96656	0.652713
CG14074	-0.5	-0.5	-0.5	1.5
CG14077	0	0	0	0
CG14079	1.47774	-0.249854	-0.613944	-0.613944
CG14100	-0.814742	-0.119937	1.43816	-0.503484
CG14102	-0.786049	-0.786049	1.30011	0.271993
CG14104	-0.847827	1.09759	-0.847827	0.598067
CG14105	-0.763346	-0.763346	1.3418	0.184894
CG14109	-0.5	-0.5	-0.5	1.5
CG14113	-0.5	-0.5	-0.5	1.5
CG14117	-0.857773	1.02644	-0.857773	0.689103
CG14130	-0.667055	1.44813	-0.667055	-0.114018
CG14135	-0.800823	0.334599	-0.800823	1.26705
CG14142	0	0	0	0
CG14154	0	0	0	0
CG1416	-0.254841	0.141295	1.26273	-1.14918
CG14174	-0.629941	-0.629941	1.47039	-0.210504
CG1418	-0.746182	-0.746182	1.36781	0.124552
CG14182	-0.783119	0.260193	-0.783119	1.30604
CG14183	0	0	0	0
CG14184	-1.4076	0.215609	0.957765	0.234225
CG14194	1.47113	-0.295113	-0.757106	-0.418908
CG14200	-0.709087	1.41222	-0.709087	0.00595729
CG14207	0.804107	0.243382	-1.45797	0.410483
CG14210	-1.29185	-0.26059	0.946799	0.605638
CG14220	-1.01011	0.106921	1.33488	-0.431692
CG14221	0	0	0	0
CG14223	-0.5	1.5	-0.5	-0.5
CG14229	-1.14085	-0.371462	0.299574	1.21274
CG14230	-0.758739	1.34919	-0.758739	0.16829
CG14231	-0.716929	1.40397	-0.716929	0.0298865
CG14232	-1.02787	-0.535261	1.24809	0.31504
CG14252	-0.5	-0.5	-0.5	1.5
CG14253	-1.14142	-0.526595	0.953878	0.714133
CG14257	-0.5	-0.5	-0.5	1.5
CG14260	0	0	0	0
CG14270	1.48174	-0.603909	-0.603909	-0.273921
CG14273	-0.5	-0.5	1.5	-0.5
CG14285	0	0	0	0
CG14286	-0.805755	1.25466	-0.805755	0.356848
CG14292	-0.5	-0.5	-0.5	1.5
CG14297	0	0	0	0
CG14302	-0.5	-0.5	1.5	-0.5
CG14312	-0.626913	1.47187	-0.626913	-0.218048
CG14322	1.42677	-0.0563456	-0.790391	-0.580032
CG14325	0	0	0	0
CG1434	-0.5	-0.5	-0.5	1.5
CG14341	-1.39626	-0.042344	0.80254	0.636069
CG14352	-0.5	-0.5	-0.5	1.5
CG14367	0	0	0	0
CG1440	1.3926	0.00366185	-0.905353	-0.490908
CG14401	-0.5	-0.5	-0.5	1.5
CG14407	-0.923405	-0.0721134	-0.409598	1.40512
CG14408	-0.621035	-0.621035	1.47463	-0.232563
CG14411	1.42365	-0.619035	-0.767205	-0.0374153
CG14414	-0.825582	-0.825582	1.19549	0.455676
CG14431	0	0	0	0
CG14434	-0.778088	-0.778088	1.31582	0.240354
CG14435	-0.5	-0.5	-0.5	1.5
CG14440	-0.794213	0.305898	-0.794213	1.28253
CG14441	0	0	0	0
CG14442	-0.5	-0.5	-0.5	1.5
CG14450	-0.5	-0.5	-0.5	1.5
CG14459	0	0	0	0
CG14464	-1.39819	0.0020775	0.510295	0.885815
CG14478	1.13269	0.382242	-1.21757	-0.297359
CG14480	-1.258	-0.172827	1.14199	0.288832
CG14483	0.172326	0.103419	-1.34651	1.07076
CG14490	0	0	0	0
CG14502	0	0	0	0
CG14511	-0.5	-0.5	-0.5	1.5
CG14512	-1.40947	0.946805	0.160888	0.301777
CG14516	0	0	0	0
CG14535	-0.5	-0.5	-0.5	1.5
CG14543	0.833254	-0.109433	0.645997	-1.36982
CG14544	-0.5	-0.5	-0.5	1.5
CG14556	-0.5	-0.5	-0.5	1.5
CG14561	-0.725718	-0.725718	1.39405	0.057388
CG14562	-0.5	-0.5	-0.5	1.5
CG14567	-0.5	1.5	-0.5	-0.5
CG14589	-0.5	-0.5	-0.5	1.5
CG14609	-0.5	-0.5	-0.5	1.5
CG14610	-0.865116	-0.865116	0.921227	0.809005
CG14613	-0.851993	0.632414	-0.851993	1.07157
CG14615	0	0	0	0
CG14618	-1.32424	-0.173999	0.965619	0.532623
CG14621	-0.581527	1.48908	-0.581527	-0.326025
CG14629	-1.05977	0.932988	0.769927	-0.643146
CG1463	1.44164	-0.0994505	-0.745483	-0.596701
CG14641	1.2187	-0.349648	-1.14688	0.277819
CG14642	-0.795921	1.27864	-0.795921	0.313201
CG14645	-0.5	-0.5	-0.5	1.5
CG14646	1.49995	-0.504744	-0.506623	-0.488584
CG14647	-0.859705	0.71201	-0.859705	1.0074
CG14650	-0.863812	0.951314	-0.863812	0.776311
CG14655	-0.5	-0.5	-0.5	1.5
CG14657	-1.28086	1.12319	0.285505	-0.127832
CG14667	-0.5	-0.5	-0.5	1.5
CG14671	1.10279	0.32013	-0.133095	-1.28983
CG14683	-0.670053	1.44598	-0.670053	-0.105871
CG14688	-0.5	-0.5	-0.5	1.5
CG14692	0	0	0	0
CG14695	0.832502	0.836381	-1.16218	-0.506708
CG14696	-0.5	1.5	-0.5	-0.5
CG14701	-1.39643	-0.0337895	0.600911	0.829307
CG14710	-0.5	-0.5	-0.5	1.5
CG14711	-1.06859	0.422276	1.18075	-0.534434
CG14712	-0.5	-0.5	-0.5	1.5
CG14715	1.09651	-0.572472	0.554266	-1.0783
CG14721	-0.85815	1.02295	-0.85815	0.693353
CG14722	1.47686	-0.326073	-0.416642	-0.734145
CG14740	0	0	0	0
CG14757	0	0	0	0
CG14762	-0.5	-0.5	-0.5	1.5
CG14764	-0.5	-0.5	-0.5	1.5
CG14767	-0.814104	1.2318	-0.814104	0.396409
CG14777	-0.827794	1.18767	-0.827794	0.467914
CG14780	-0.5	1.5	-0.5	-0.5
CG14785	0	0	0	0
CG14787	0	0	0	0
CG14803	-0.5	1.5	-0.5	-0.5
CG14805	-1.31352	0.43164	-0.150446	1.03233
CG14806	-1.3986	0.110627	0.96197	0.326007
CG14812	-1.32445	0.0757402	0.144524	1.10418
CG14814	-0.5	-0.5	-0.5	1.5
CG14817	0.870798	-0.784301	0.857541	-0.944037
CG14818	0.450941	-1.47666	0.725093	0.300624
CG14834	0	0	0	0
CG14855	0	0	0	0
CG1486	-1.37924	-0.0837371	0.63021	0.832772
CG14860	0	0	0	0
CG14879	0	0	0	0
CG14881	-0.844524	1.11574	-0.844524	0.573309
CG14882	-0.5	-0.5	-0.5	1.5
CG14883	-0.834841	-0.834841	0.50914	1.16054
CG14894	-0.0360264	-1.39392	0.585892	0.844053
CG14903	-1.13726	-0.465881	0.481761	1.12138
CG14906	-0.854963	0.659828	-0.854963	1.0501
CG14907	-1.38882	0.140013	0.993052	0.25576
CG1492	-0.884672	0.290428	1.28617	-0.691929
CG14937	-0.5	-0.5	-0.5	1.5
CG1494	0	0	0	0
CG14957	-0.526651	1.4989	-0.526651	-0.445603
CG14961	-0.671525	1.4449	-0.671525	-0.10185
CG14963	0	0	0	0
CG14964	-0.5	-0.5	-0.5	1.5
CG14965	-0.5	-0.5	-0.5	1.5
CG14966	-1.38645	0.0886879	0.986365	0.311399
CG14969	1.32223	-0.172229	-1.10453	-0.0454671
CG14971	-0.936928	-0.0388836	1.3947	-0.418888
CG14977	-1.47672	0.353569	0.383332	0.739822
CG14984	-0.5	-0.5	1.5	-0.5
CG14985	-1.27795	1.14938	-0.0726684	0.201234
CG14990	-0.5	-0.5	1.5	-0.5
CG14995	-0.787654	-0.355252	-0.323053	1.46596
CG14997	-1.41135	0.125814	0.930825	0.354713
CG15011	-0.71275	-0.71275	1.40843	0.0170681
CG15012	0.230544	-1.35531	1.05097	0.0737923
CG15014	1.49937	-0.467041	-0.537295	-0.495038
CG15019	-1.24245	0.73307	0.882861	-0.373484
CG15027	-1.20111	0.528663	1.0614	-0.388945
CG15034	-0.5	-0.5	-0.5	1.5
CG15040	0	0	0	0
CG15043	0	0	0	0
CG15073	-0.614041	1.4777	-0.614041	-0.249617
CG15083	0.62326	1.07709	-0.904254	-0.79609
CG15084	-0.860916	0.993762	-0.860916	0.72807
CG15093	-0.950973	0.839479	0.887826	-0.776332
CG15097	-0.5	-0.5	-0.5	1.5
CG15098	1.34532	0.0542118	-0.377409	-1.02212
CG15099	1.39704	0.0460816	-0.770881	-0.672238
CG15107	-0.803537	-0.803537	1.26033	0.346746
CG15109	0	0	0	0
CG15111	-1.31185	0.0165677	1.11662	0.178659
CG15117	-0.853074	-0.853074	1.06409	0.642058
CG15118	-1.37131	0.785338	0.699841	-0.113866
CG15127	-0.5	-0.5	1.5	-0.5
CG1513	-1.22603	-0.347197	0.523205	1.05003
CG15141	-0.866001	0.875206	-0.866001	0.856796
CG15143	-0.5	-0.5	-0.5	1.5
CG15144	0	0	0	0
CG15145	0	0	0	0
CG15160	-0.5	-0.5	-0.5	1.5
CG15168	-1.11123	1.29611	0.0921973	-0.277074
CG15170	0	0	0	0
CG15186	0	0	0	0
CG15196	-0.5	-0.5	-0.5	1.5
CG15200	0	0	0	0
CG15201	0	0	0	0
CG15202	0	0	0	0
CG15209	-0.560197	1.4942	-0.560197	-0.373805
CG15210	-0.630902	-0.630902	1.4699	-0.208101
CG15211	-0.945736	1.37832	0.0206291	-0.453211
CG15219	-0.5	-0.5	-0.5	1.5
CG1523	-0.5	-0.5	-0.5	1.5
CG15237	-1.29026	0.465476	-0.21148	1.03626
CG15247	0	0	0	0
CG15278	0	0	0	0
CG1529	-0.713501	1.40764	-0.713501	0.0193595
CG15293	-0.5	-0.5	-0.5	1.5
CG15309	-0.692109	1.4283	-0.692109	-0.0440763
CG15312	0	0	0	0
CG15317	-0.5	-0.5	-0.5	1.5
CG1532	0.0167662	-1.19923	1.24791	-0.065455
CG15322	0	0	0	0
CG15332	0	0	0	0
CG15333	0	0	0	0
CG15336	0	0	0	0
CG15343	-0.526451	1.49892	-0.526451	-0.446019
CG15347	-0.809934	-0.883296	0.59139	1.10184
CG15353	-0.5	-0.5	-0.5	1.5
CG15356	-0.5	-0.5	-0.5	1.5
CG15362	-0.770309	-0.770309	1.32999	0.210625
CG15365	-0.5	-0.5	-0.5	1.5
CG15375	0	0	0	0
CG15382	1.5	-0.5	-0.5	-0.5
CG15385	-0.549011	1.4962	-0.549011	-0.398182
CG15387	-0.726089	0.0585636	-0.726089	1.39361
CG15390	-0.5	-0.5	-0.5	1.5
CG15399	-0.5	-0.5	-0.5	1.5
CG15418	0	0	0	0
CG1542	-0.625603	1.48566	-0.30436	-0.555697
CG15422	0	0	0	0
CG15423	-0.5	1.5	-0.5	-0.5
CG15432	-1.09299	5.67223e-05	-0.230746	1.32368
CG15435	-0.825152	1.19697	-0.825152	0.453337
CG15436	1.5	-0.5	-0.5	-0.5
CG15439	1.49155	-0.412092	-0.646589	-0.43287
CG1544	-0.565099	1.49318	-0.565099	-0.362978
CG15443	-0.861828	-0.861828	0.982259	0.741397
CG15445	-0.718967	1.40174	-0.718967	0.0361974
CG15449	0	0	0	0
CG15456	-0.740788	1.37519	-0.740788	0.106386
CG15482	0	0	0	0
CG15484	-0.5	1.5	-0.5	-0.5
CG15514	-0.679401	1.43889	-0.679401	-0.0800923
CG15525	-1.19231	-0.244306	1.21165	0.224973
CG15530	0	0	0	0
CG15531	0	0	0	0
CG15535	-1.14015	-0.222011	1.28234	0.0798297
CG15536	-1.22347	1.16393	0.300538	-0.240996
CG15543	-0.5	1.5	-0.5	-0.5
CG15547	-1.08253	1.03955	0.632456	-0.589477
CG15561	-0.5	-0.5	-0.5	1.5
CG15579	-0.5	1.5	-0.5	-0.5
CG15597	0	0	0	0
CG15601	-0.545544	1.49673	-0.545544	-0.405648
CG15602	1.46367	-0.747486	-0.503803	-0.212384
CG15611	-0.888584	0.400107	1.22684	-0.738367
CG15628	1.5	-0.5	-0.5	-0.5
CG15642	0	0	0	0
CG15643	-0.910568	1.42632	-0.216175	-0.299577
CG15650	-0.5	-0.5	-0.5	1.5
CG15653	-1.45914	0.427931	0.794978	0.236229
CG15657	0	0	0	0
CG15673	0	0	0	0
CG15674	0	0	0	0
CG15695	1.03464	0.677759	-0.811422	-0.900976
CG15696	0	0	0	0
CG15701	-0.5	-0.5	-0.5	1.5
CG15706	-1.18057	-0.0154413	1.26539	-0.069382
CG15715	-1.43605	0.879513	0.346599	0.209942
CG15717	-1.12925	-0.116694	1.30671	-0.0607633
CG1572	-0.959955	0.554947	1.12134	-0.716328
CG15725	0	0	0	0
CG15739	0	0	0	0
CG15740	-0.507002	1.49993	-0.507002	-0.485922
CG15743	-0.5	-0.5	-0.5	1.5
CG15744	-0.63113	-0.63113	1.46979	-0.20753
CG15747	-0.5	-0.5	-0.5	1.5
CG1575	-0.759702	1.34767	-0.759702	0.171735
CG15771	-0.947495	-0.506397	1.355	0.0988874
CG1578	-0.78222	1.30783	-0.78222	0.256612
CG15784	-1.11224	1.26985	-0.341473	0.183861
CG15814	1.49079	-0.458237	-0.647604	-0.384945
CG15818	-0.552222	-0.552222	1.49567	-0.39123
CG1582	-1.03351	0.992816	0.707859	-0.667162
CG15820	-0.842862	-0.842862	0.561493	1.12423
CG15822	0	0	0	0
CG15861	-0.5	-0.5	-0.5	1.5
CG15864	-0.5	-0.5	-0.5	1.5
CG15870	0	0	0	0
CG15877	-0.779776	1.3126	-0.779776	0.246953
CG15879	-0.672392	-0.672392	-0.0994756	1.44426
CG15891	-1.10556	-0.309293	0.123836	1.29102
CG15892	0	0	0	0
CG15908	-1.30263	0.669464	-0.255487	0.888652
CG15909	-0.5	-0.5	-0.5	1.5
CG15912	-0.608857	-0.608857	1.47983	-0.262112
CG15914	1.49837	-0.532432	-0.532432	-0.433503
CG15916	-0.856685	1.03608	-0.856685	0.677295
CG15922	1.24727	-0.749621	0.367035	-0.864682
CG15923	0	0	0	0
CG1598	0.808719	-0.769462	0.916622	-0.95588
CG1602	-0.933812	0.468277	1.18154	-0.716008
CG1603	-0.5	-0.5	-0.5	1.5
CG1607	-0.67843	-0.67843	1.43966	-0.0827968
CG1620	-1.13071	0.817071	-0.551944	0.865587
CG1622	-1.11542	-0.171652	1.31365	-0.0265771
CG1628	-0.632011	-0.632011	1.46934	-0.205321
CG1635	1.40877	-0.529261	-0.85717	-0.0223425
CG1636	-1.25493	-0.338978	0.93834	0.655566
CG1637	1.02639	-1.27833	-0.248623	0.500562
CG1638	0	0	0	0
CG1640	1.28367	-0.979826	0.263986	-0.567833
CG1646	-1.4614	0.804766	0.305012	0.351619
CG1647	-0.858454	0.696856	-0.858454	1.02005
CG1648	-1.08254	-0.612406	0.938677	0.756272
CG1662	-0.751613	1.36002	-0.751613	0.14321
CG1663	-0.5	-0.5	-0.5	1.5
CG16700	-0.5	-0.5	-0.5	1.5
CG1671	1.49233	-0.360703	-0.601456	-0.530174
CG16710	0.865784	-0.426232	0.773234	-1.21279
CG16711	1.24896	-0.916475	0.355716	-0.688205
CG16713	-0.5	1.5	-0.5	-0.5
CG16717	-0.747912	-0.431849	1.47255	-0.292791
CG16721	-1.36947	-0.120484	0.73978	0.750173
CG1673	-0.5	1.5	-0.5	-0.5
CG16734	-0.673829	1.44319	-0.673829	-0.0955278
CG1674	-0.5	-0.5	-0.5	1.5
CG16743	-0.5	-0.5	-0.5	1.5
CG16753	-0.619227	-0.619227	1.47545	-0.236996
CG16758	0	0	0	0
CG1677	-1.22565	1.20603	-0.136987	0.156606
CG16779	-0.5	-0.5	-0.5	1.5
CG16782	-0.5	-0.5	-0.5	1.5
CG16787	-1.03882	1.29386	0.199788	-0.454832
CG16789	-0.5	-0.5	-0.5	1.5
CG16790	-0.740455	-0.740455	1.37563	0.105274
CG16791	-0.523617	1.49914	-0.523617	-0.451909
CG16812	-0.866017	0.871465	-0.866017	0.860569
CG16824	0	0	0	0
CG16863	-0.5	-0.5	-0.5	1.5
CG16865	-0.985218	0.573068	1.10496	-0.692814
CG16868	0	0	0	0
CG16890	-1.06207	0.0521765	-0.319472	1.32937
CG16896	-0.5	-0.5	1.5	-0.5
CG16903	-0.834601	1.16153	-0.834601	0.507674
CG16908	-0.5	1.5	-0.5	-0.5
CG16926	-0.5	-0.5	-0.5	1.5
CG16935	1.47941	-0.490252	-0.696806	-0.29235
CG16952	1.44167	-0.151561	-0.827315	-0.462792
CG16953	0.409995	0.8386	-1.44563	0.197031
CG16957	0	0	0	0
CG16972	-0.5	-0.5	-0.5	1.5
CG16974	1.47348	-0.640576	-0.227161	-0.605741
CG16979	-1.01361	1.36033	-0.349416	0.00269623
CG16985	-1.03549	1.26734	0.267967	-0.49981
CG16986	-0.706255	-0.706255	1.41506	-0.00255204
CG16989	-0.681105	-0.0753275	-0.681105	1.43754
CG17002	-0.861419	0.987566	-0.861419	0.735273
CG17019	1.16049	-0.326068	0.357002	-1.19142
CG17028	0	0	0	0
CG17029	0.780452	0.869107	-0.453955	-1.1956
CG1703	-1.49657	0.530172	0.561456	0.404937
CG17032	-0.5	-0.5	-0.5	1.5
CG17036	-0.5	-0.5	-0.5	1.5
CG17059	-1.37403	0.616804	0.850261	-0.0930358
CG17065	-0.793122	0.301272	-0.793122	1.28497
CG17068	-0.676616	1.44106	-0.676616	-0.0878335
CG17075	-0.5	-0.5	-0.5	1.5
CG17078	-1.0632	1.2691	0.241869	-0.447765
CG17104	-0.5	-0.5	-0.5	1.5
CG17109	-0.513462	1.49972	-0.513462	-0.4728
CG17110	1.5	-0.5	-0.5	-0.5
CG17118	0	0	0	0
CG17119	-0.91246	-0.0636621	1.40647	-0.43035
CG17124	1.5	-0.5	-0.5	-0.5
CG17129	-0.5	-0.5	-0.5	1.5
CG17141	-0.856402	1.03848	-0.856402	0.674323
CG17162	1.5	-0.5	-0.5	-0.5
CG17163	-0.5	-0.5	-0.5	1.5
CG17167	-0.5	-0.5	-0.5	1.5
CG17168	-0.980927	-0.22338	-0.192423	1.39673
CG17186	-0.856632	1.03653	-0.856632	0.676734
CG17187	-0.5	-0.5	-0.5	1.5
CG17189	0	0	0	0
CG17202	-1.19032	-0.455698	0.721064	0.924955
CG17219	-0.546967	-0.546967	1.49652	-0.402588
CG1722	0	0	0	0
CG17221	-0.594797	-0.594797	1.48498	-0.295389
CG17230	-0.5	-0.5	-0.5	1.5
CG17233	1.48841	-0.33583	-0.638131	-0.514445
CG17249	-1.18051	-0.0535443	1.2659	-0.031846
CG17258	0	0	0	0
CG17260	-0.5	-0.5	-0.5	1.5
CG17261	-0.5	-0.5	-0.5	1.5
CG17266	-1.39716	0.147396	0.975073	0.27469
CG17270	0	0	0	0
CG17271	1.2403	-0.417188	0.27723	-1.10034
CG17272	-0.5	-0.5	-0.5	1.5
CG17278	1.11603	0.542461	-0.623212	-1.03528
CG17292	0	0	0	0
CG17294	-0.802982	1.26172	-0.802982	0.344246
CG17327	-1.42608	0.458858	0.104156	0.863069
CG17328	0	0	0	0
CG17333	-1.24401	-0.334325	1.00721	0.571131
CG17343	-0.654365	-0.14789	-0.654365	1.45662
CG17350	-0.5	-0.5	-0.5	1.5
CG17359	-0.5	-0.5	-0.5	1.5
CG17361	-0.5	-0.5	-0.5	1.5
CG1737	-0.784317	1.30364	-0.784317	0.264997
CG17376	-0.5	-0.5	-0.5	1.5
CG17377	0	0	0	0
CG1738	-0.746309	1.36763	-0.746309	0.124983
CG17385	-1.36187	0.239676	0.0824444	1.03975
CG17387	0	0	0	0
CG17440	-0.5	-0.5	-0.5	1.5
CG17454	-1.07415	-0.613369	0.995595	0.691928
CG17486	-1.30108	-0.237449	0.952686	0.58584
CG17490	-0.713099	-0.713099	1.40807	0.0181319
CG17493	-1.34192	-0.181718	0.814154	0.709488
CG1750	-0.668176	-0.668176	1.44733	-0.110979
CG17508	1.37643	-0.480052	-0.934631	0.0382565
CG17528	-1.1297	1.2973	-0.199431	0.0318268
CG17544	-0.999303	-0.456613	1.33337	0.122545
CG17549	-0.5	-0.5	-0.5	1.5
CG17556	-0.985524	0.0247281	1.36543	-0.404636
CG17565	-1.48761	0.352266	0.663697	0.471642
CG17568	-0.5	-0.5	-0.5	1.5
CG17570	-0.5	-0.5	1.5	-0.5
CG17574	0.771541	0.814063	-1.28522	-0.300382
CG17593	-0.982491	1.36977	-0.39791	0.0106321
CG17597	-1.32564	0.0974809	1.10345	0.124709
CG17598	-1.45444	0.816299	0.404649	0.233493
CG17600	-1.29079	0.00340512	1.14628	0.141105
CG17612	-0.5	-0.5	-0.5	1.5
CG17637	0	0	0	0
CG1764	-0.927837	0.021465	-0.476304	1.38268
CG17646	-0.630878	1.46992	-0.630878	-0.20816
CG17650	0	0	0	0
CG17652	-0.5	-0.5	-0.5	1.5
CG17660	1.45824	-0.742118	-0.175878	-0.540244
CG17666	-0.5	-0.5	-0.5	1.5
CG17681	-0.829261	-0.829261	1.18232	0.476202
CG17683	-1.39572	0.127839	0.974431	0.293448
CG17684	-0.5	-0.5	-0.5	1.5
CG17691	-1.46732	0.325044	0.782005	0.360268
CG17698	-1.33454	0.916937	-0.172664	0.590267
CG17707	-0.5	-0.5	-0.5	1.5
CG17712	-1.14249	-0.433546	0.424147	1.15189
CG17715	-0.639823	1.4652	-0.639823	-0.185559
CG17721	-1.27635	0.799306	-0.317467	0.794513
CG17724	-0.606784	1.48064	-0.606784	-0.267072
CG17726	-0.849174	1.0896	-0.849174	0.608746
CG17734	1.17922	-1.09425	-0.494406	0.409433
CG1774	-0.5	1.5	-0.5	-0.5
CG17746	-0.654269	-0.916173	0.285513	1.28493
CG17754	0.895906	-0.566779	-1.11901	0.789887
CG17760	-1.18461	-0.470907	0.780013	0.875508
CG17765	-1.48585	0.335887	0.670412	0.479554
CG17768	-0.746244	-0.746244	0.124762	1.36773
CG17776	-0.892146	1.4322	-0.210683	-0.329373
CG17786	0	0	0	0
CG17802	-0.684045	1.43515	-0.684045	-0.0670652
CG17806	-0.5	-0.5	-0.5	1.5
CG17807	-0.804862	-0.804862	1.25696	0.352762
CG17816	1.49265	-0.567455	-0.567455	-0.357742
CG17829	-0.5	-0.5	-0.5	1.5
CG17834	-0.854718	-0.854718	0.657456	1.05198
CG17839	-0.558794	1.49447	-0.558794	-0.376886
CG17841	-0.072642	-0.474622	1.41812	-0.870856
CG1785	-0.766578	1.33642	-0.766578	0.196737
CG17855	-1.4201	0.91278	0.357255	0.150065
CG17883	1.21241	-0.641137	0.405674	-0.976949
CG1789	-1.34991	-0.0897423	0.978086	0.461564
CG17896	1.19931	-0.452755	0.360888	-1.10744
CG17904	-1.45079	0.146113	0.545592	0.75908
CG17919	0	0	0	0
CG1792	-1.49997	0.50796	0.49348	0.498533
CG17928	-0.736433	1.42895	-0.0496437	-0.642878
CG17931	-0.837519	0.525872	-0.837519	1.14917
CG17977	-0.5	-0.5	-0.5	1.5
CG17982	-0.5	-0.5	-0.5	1.5
CG17985	-1.44397	0.106786	0.599688	0.737501
CG17996	-1.04003	0.873664	-0.672202	0.838567
CG18004	-0.758136	-0.758136	1.35013	0.16614
CG1801	0	0	0	0
CG18011	-0.5	-0.5	-0.5	1.5
CG18048	-0.5	-0.5	-0.5	1.5
CG1806	-0.5	-0.5	-0.5	1.5
CG18081	1.28146	-0.677614	-0.900415	0.296571
CG18088	0	0	0	0
CG18094	1.46804	-0.199118	-0.64257	-0.626351
CG1812	-0.843967	-0.843967	1.11863	0.569301
CG18131	0	0	0	0
CG18135	1.16673	-0.00267369	-1.27529	0.111225
CG1814	-0.585293	1.48799	-0.585293	-0.317406
CG1815	-1.12678	1.25313	0.21255	-0.338894
CG18155	-0.5	-0.5	-0.5	1.5
CG18171	1.45657	-0.768033	-0.183818	-0.504719
CG18178	-0.5	-0.5	-0.5	1.5
CG18180	0	0	0	0
CG18213	1.5	-0.5	-0.5	-0.5
CG1824	-0.5	-0.5	-0.5	1.5
CG18249	-0.5	1.5	-0.5	-0.5
CG18259	-0.629048	1.47083	-0.629048	-0.212734
CG18262	-0.5	-0.5	-0.5	1.5
CG1827	1.18033	0.436483	-1.04214	-0.574676
CG18273	0	0	0	0
CG18278	0	0	0	0
CG18281	-0.5	-0.5	-0.5	1.5
CG18324	-1.04696	1.18879	0.419283	-0.561112
CG18335	-0.5	1.5	-0.5	-0.5
CG18336	0	0	0	0
CG18343	-1.3382	0.537028	0.948251	-0.147075
CG1835	-0.52868	1.49873	-0.52868	-0.441369
CG18371	-0.5	1.5	-0.5	-0.5
CG1840	-1.20755	1.16551	0.323113	-0.281081
CG18428	-1.04926	-0.171319	1.36022	-0.139644
CG18446	1.39545	0.0535838	-0.724517	-0.724517
CG18449	0	0	0	0
CG1847	-0.5	-0.5	-0.5	1.5
CG18473	0	0	0	0
CG18476	-0.5	-0.5	-0.5	1.5
CG18477	0	0	0	0
CG18480	0	0	0	0
CG18507	0	0	0	0
CG18508	-0.765819	1.33769	-0.765819	0.193944
CG18528	-0.796796	1.27662	-0.796796	0.31697
CG18547	1.006	-1.37215	0.044976	0.321168
CG18549	-0.626615	1.47202	-0.626615	-0.218788
CG18557	-0.933972	-0.383149	-0.0875935	1.40471
CG18558	-0.746188	-0.746188	0.124571	1.3678
CG18563	-0.861304	-0.861304	0.989015	0.733594
CG18568	-0.5	-0.5	-0.5	1.5
CG18596	-0.5	-0.5	-0.5	1.5
CG18600	-0.5	-0.5	-0.5	1.5
CG18605	0	0	0	0
CG18622	-0.5	-0.5	-0.5	1.5
CG18628	0	0	0	0
CG18659	-1.35482	0.00206236	0.323196	1.02956
CG18661	1.49983	-0.510472	-0.510472	-0.47889
CG18662	-0.5	-0.5	-0.5	1.5
CG18731	-0.81904	1.21697	-0.81904	0.42111
CG18744	-0.5	1.5	-0.5	-0.5
CG18747	-0.892616	0.546457	1.13347	-0.787313
CG18749	-1.47639	0.656331	0.573203	0.246857
CG18754	-0.678102	1.43991	-0.678102	-0.0837074
CG18764	-0.5	-0.5	-0.5	1.5
CG18766	-1.49979	0.480119	0.52059	0.499086
CG18787	-0.784269	1.30373	-0.784269	0.264803
CG18789	0	0	0	0
CG18808	0	0	0	0
CG18809	-0.5	-0.5	-0.5	1.5
CG18815	-1.11636	0.27587	-0.39352	1.23401
CG1882	-0.696629	1.42424	-0.696629	-0.0309806
CG18858	-0.53208	1.4984	-0.53208	-0.434243
CG18870	-0.764508	-0.764508	1.33988	0.189133
CG1888	-1.45826	0.813536	0.36605	0.27867
CG1890	-0.961002	0.692518	1.01766	-0.749175
CG1896	-0.723274	-0.723274	1.39688	0.0496639
CG1902	-0.943534	1.41389	-0.238978	-0.231382
CG1907	-0.827474	-0.564849	1.41273	-0.0204104
CG1910	-0.228549	-1.05882	-0.0627165	1.35009
[truncated: 6,543 more rows]
