# Supplementary material for: A single-cell survey of Drosophila blood
Source: eLife. 2020 May 12;9:e54818. doi: 10.7554/eLife.54818 (PMC7237219; doi:10.7554/eLife.54818)
Supplement: Supplementary file 6. [file elife-54818-supp6.xlsx]

## Sheet: Sheet1
category	cluster_name	term	source_annotation	markers	size	count markers	pvalue
signaling pathway	PM6	Circadian Clock pathway	GLAD_pathway	mnd,sgg,vri,	28	3	0.0131167
signaling pathway	LM2	Circadian Clock pathway	GLAD_pathway	flw,sgg,Pp1-87B,nmo,wdb,	28	5	0.00311237
signaling pathway	PM10	Circadian Clock pathway	GLAD_pathway	nmo,Pdp1,	28	2	0.0560254
signaling pathway	CC1	Circadian Clock pathway	GLAD_pathway	mnd,Pdp1,tyf,	28	3	0.00892949
signaling pathway	PM11	Circadian Clock pathway	GLAD_pathway	sgg,slmb,	28	2	0.0565434
signaling pathway	non-hemo	Circadian Clock pathway	GLAD_pathway	CkIIbeta,dco,mnd,Pp1-87B,mts,tws,nmo,cyc,tyf,wdb,cwo,Pp2A-29B,CkIIalpha,slmb,	28	14	2.52519e-07
signaling pathway	LM1	Circadian Clock pathway	GLAD_pathway	flw,	28	1	0.301368
signaling pathway	CC2	Circadian Clock pathway	GLAD_pathway	tyf,	28	1	0.201579
signaling pathway	PM6	EGFR and PVR RTK signaling pathway	GLAD_pathway	drk,	39	1	0.503834
signaling pathway	LM2	EGFR and PVR RTK signaling pathway	GLAD_pathway	Ras85D,aos,drk,Shc,	39	4	0.0527506
signaling pathway	PM10	EGFR and PVR RTK signaling pathway	GLAD_pathway	csw,	39	1	0.416841
signaling pathway	PM11	EGFR and PVR RTK signaling pathway	GLAD_pathway	kek1,	39	1	0.418488
signaling pathway	PM12	EGFR and PVR RTK signaling pathway	GLAD_pathway	rl,kek1,Pvr,	39	3	0.0577689
signaling pathway	non-hemo	EGFR and PVR RTK signaling pathway	GLAD_pathway	aop,S,Egfr,vn,RasGAP1,aos,drk,spi,kek1,Mkp3,Src64B,	39	11	0.00213082
signaling pathway	LM1	EGFR and PVR RTK signaling pathway	GLAD_pathway	Ras85D,Pvf2,	39	2	0.0877478
signaling pathway	PM3	EGFR and PVR RTK signaling pathway	GLAD_pathway	RasGAP1,	39	1	0.242054
signaling pathway	PM5	EGFR and PVR RTK signaling pathway	GLAD_pathway	kek1,Pvf2,	39	2	0.0607928
signaling pathway	PM6	FGFR signaling pathway	GLAD_pathway	mys,	30	1	0.416632
signaling pathway	PM7	FGFR signaling pathway	GLAD_pathway	Rac2,	30	1	0.221096
signaling pathway	LM2	FGFR signaling pathway	GLAD_pathway	Ras85D,mew,mys,btl,Rac2,Shc,Mmp2,pyr,	30	8	8.58185e-06
signaling pathway	PM11	FGFR signaling pathway	GLAD_pathway	ttk,	30	1	0.340902
signaling pathway	non-hemo	FGFR signaling pathway	GLAD_pathway	aop,if,ttk,RasGAP1,lolal,Mmp2,grh,	30	7	0.036981
signaling pathway	LM1	FGFR signaling pathway	GLAD_pathway	Ras85D,mew,mys,Rac2,Mmp2,pyr,	30	6	1.78927e-06
signaling pathway	PM3	FGFR signaling pathway	GLAD_pathway	RasGAP1,	30	1	0.191939
signaling pathway	LM2	HEDGEHOG signaling pathway	GLAD_pathway	dally,	9	1	0.284478
signaling pathway	PM11	HEDGEHOG signaling pathway	GLAD_pathway	dally,	9	1	0.117477
signaling pathway	PM12	HEDGEHOG signaling pathway	GLAD_pathway	ci,	9	1	0.18632
signaling pathway	non-hemo	HEDGEHOG signaling pathway	GLAD_pathway	smo,ptc,ci,dlp,dally,	9	5	0.00125794
signaling pathway	PM6	HIPPO signaling pathway	GLAD_pathway	sd,	15	1	0.236103
signaling pathway	LM2	HIPPO signaling pathway	GLAD_pathway	yki,	15	1	0.427662
signaling pathway	non-hemo	HIPPO signaling pathway	GLAD_pathway	ds,ft,dco,sd,tsh,ex,d,	15	7	0.000492325
signaling pathway	LM1	HIPPO signaling pathway	GLAD_pathway	sd,	15	1	0.174721
signaling pathway	PM6	Imd pathway	GLAD_pathway	Jra,Rel,pirk,PGRP-LB,puc,	35	5	0.000358811
signaling pathway	PM7	Imd pathway	GLAD_pathway	Jra,Rel,pirk,PGRP-LB,PGRP-SC2,puc,	35	6	3.79046e-07
signaling pathway	LM2	Imd pathway	GLAD_pathway	Jra,	35	1	0.728287
signaling pathway	CC1	Imd pathway	GLAD_pathway	PGRP-LB,	35	1	0.420086
signaling pathway	PM11	Imd pathway	GLAD_pathway	Rel,pirk,PGRP-LB,puc,slmb,	35	5	0.000109666
signaling pathway	non-hemo	Imd pathway	GLAD_pathway	ben,bsk,kay,Uev1A,Cka,puc,slmb,Dsp1,	35	8	0.0298447
signaling pathway	LM1	Imd pathway	GLAD_pathway	Jra,	35	1	0.361352
signaling pathway	PM3	Imd pathway	GLAD_pathway	Jra,kay,Rel,	35	3	0.00190504
signaling pathway	PM6	INSULIN signaling pathway	GLAD_pathway	sgg,InR,CAP,RpS6,	37	4	0.00406891
signaling pathway	PM7	INSULIN signaling pathway	GLAD_pathway	CAP,	37	1	0.265266
signaling pathway	LM2	INSULIN signaling pathway	GLAD_pathway	sgg,Flo1,CAP,foxo,Thor,	37	5	0.0105536
signaling pathway	CC1	INSULIN signaling pathway	GLAD_pathway	InR,	37	1	0.437888
signaling pathway	PM11	INSULIN signaling pathway	GLAD_pathway	sgg,Pdk1,CAP,foxo,Ilp6,	37	5	0.000144002
signaling pathway	non-hemo	INSULIN signaling pathway	GLAD_pathway	Akt1,Pten,foxo,RpS6,sima,	37	5	0.368998
signaling pathway	LM1	INSULIN signaling pathway	GLAD_pathway	S6k,	37	1	0.377529
signaling pathway	PM3	INSULIN signaling pathway	GLAD_pathway	Thor,	37	1	0.23119
signaling pathway	PM4	INSULIN signaling pathway	GLAD_pathway	CAP,	37	1	0.0615867
signaling pathway	LM2	JAK/STAT signaling pathway	GLAD_pathway	upd3,Ptp61F,	10	2	0.0492775
signaling pathway	PM11	JAK/STAT signaling pathway	GLAD_pathway	Socs36E,	10	1	0.129651
signaling pathway	non-hemo	JAK/STAT signaling pathway	GLAD_pathway	Su(var)2-10,ken,Socs36E,dome,Ptp61F,	10	5	0.00229298
signaling pathway	PM6	JNK signaling pathway	GLAD_pathway	Jra,puc,	26	2	0.0774562
signaling pathway	PM7	JNK signaling pathway	GLAD_pathway	Jra,puc,	26	2	0.0194306
signaling pathway	LM2	JNK signaling pathway	GLAD_pathway	Jra,msn,Rala,scaf,	26	4	0.0138555
signaling pathway	PM11	JNK signaling pathway	GLAD_pathway	Gadd45,puc,	26	2	0.0494871
signaling pathway	non-hemo	JNK signaling pathway	GLAD_pathway	ben,bsk,kay,raw,Traf4,Mnn1,wnd,puc,	26	8	0.00473237
signaling pathway	LM1	JNK signaling pathway	GLAD_pathway	Jra,	26	1	0.283223
signaling pathway	PM3	JNK signaling pathway	GLAD_pathway	Jra,kay,Gadd45,	26	3	0.00079244
signaling pathway	PM6	NOTCH signaling pathway	GLAD_pathway	Su(dx),	33	1	0.447275
signaling pathway	PM7	NOTCH signaling pathway	GLAD_pathway	Su(dx),	33	1	0.240339
signaling pathway	PM10	NOTCH signaling pathway	GLAD_pathway	mam,	33	1	0.366331
signaling pathway	CC1	NOTCH signaling pathway	GLAD_pathway	E(spl)m3-HLH,mam,E(spl)mbeta-HLH,N,	33	4	0.00158764
signaling pathway	PM12	NOTCH signaling pathway	GLAD_pathway	kuz,	33	1	0.530778
signaling pathway	non-hemo	NOTCH signaling pathway	GLAD_pathway	Brd,Dl,E(spl)m2-BFM,E(spl)m3-HLH,E(spl)m7-HLH,E(spl)malpha-BFM,E(spl)mbeta-HLH,E(spl)mdelta-HLH,E(spl)mgamma-HLH,neur,numb,N,Su(H),fng,Tom,	33	15	4.55992e-07
signaling pathway	PM3	NOTCH signaling pathway	GLAD_pathway	E(spl)mbeta-HLH,Su(dx),	33	2	0.0226689
signaling pathway	PM5	NOTCH signaling pathway	GLAD_pathway	E(spl)mbeta-HLH,N,	33	2	0.0450675
signaling pathway	CC2	NOTCH signaling pathway	GLAD_pathway	E(spl)m3-HLH,E(spl)mbeta-HLH,N,	33	3	0.00228337
signaling pathway	PM11	Nuclear hormone receptor	GLAD_pathway	Eip75B,ftz-f1,	18	2	0.0250239
signaling pathway	PM12	Nuclear hormone receptor	GLAD_pathway	Hr78,	18	1	0.338013
signaling pathway	non-hemo	Nuclear hormone receptor	GLAD_pathway	EcR,Eip75B,ftz-f1,	18	3	0.306211
signaling pathway	PM6	Planar Cell Polarity pathway	GLAD_pathway	Jra,puc,	37	2	0.140142
signaling pathway	PM7	Planar Cell Polarity pathway	GLAD_pathway	Jra,puc,	37	2	0.0375451
signaling pathway	LM2	Planar Cell Polarity pathway	GLAD_pathway	flw,Jra,sqh,Pp1-87B,Mlc-c,Mbs,msn,Rho1,DAAM,wdb,RhoGDI,	37	11	4.97199e-08
signaling pathway	PM11	Planar Cell Polarity pathway	GLAD_pathway	puc,	37	1	0.402073
signaling pathway	PM12	Planar Cell Polarity pathway	GLAD_pathway	zip,	37	1	0.571952
signaling pathway	non-hemo	Planar Cell Polarity pathway	GLAD_pathway	bsk,ds,ft,fz,kay,pk,Pp1-87B,Mbs,Gug,Vang,Rok,RhoGAPp190,wdb,MYPT-75D,Cka,puc,d,	37	17	6.37503e-08
signaling pathway	LM1	Planar Cell Polarity pathway	GLAD_pathway	flw,Jra,Rho1,RhoGDI,	37	4	0.00120242
signaling pathway	PM3	Planar Cell Polarity pathway	GLAD_pathway	Jra,kay,	37	2	0.0280781
signaling pathway	PM6	TGF beta signaling pathway	GLAD_pathway	shn,	10	1	0.164325
signaling pathway	PM11	TGF beta signaling pathway	GLAD_pathway	shn,	10	1	0.129651
signaling pathway	non-hemo	TGF beta signaling pathway	GLAD_pathway	dpp,put,shn,tkv,Mad,Med,Dad,gbb,	10	8	6.63373e-07
signaling pathway	PM6	TNF alpha signaling pathway	GLAD_pathway	Jra,puc,	24	2	0.0673003
signaling pathway	PM7	TNF alpha signaling pathway	GLAD_pathway	Jra,Rac2,puc,	24	3	0.000988068
signaling pathway	LM2	TNF alpha signaling pathway	GLAD_pathway	Jra,msn,Rac2,	24	3	0.0554296
signaling pathway	PM11	TNF alpha signaling pathway	GLAD_pathway	puc,	24	1	0.283541
signaling pathway	non-hemo	TNF alpha signaling pathway	GLAD_pathway	aop,bsk,kay,Btk29A,Cka,tum,puc,cno,Src64B,	24	9	0.000558062
signaling pathway	PM2	TNF alpha signaling pathway	GLAD_pathway	tum,	24	1	0.0583528
signaling pathway	LM1	TNF alpha signaling pathway	GLAD_pathway	Jra,Rac2,	24	2	0.0369415
signaling pathway	PM3	TNF alpha signaling pathway	GLAD_pathway	Jra,kay,RhoL,	24	3	0.000623239
signaling pathway	PM9	TNF alpha signaling pathway	GLAD_pathway	Cdc42,tum,	24	2	0.0253326
signaling pathway	PM6	Toll pathway	GLAD_pathway	mnd,	29	1	0.406046
signaling pathway	PM7	Toll pathway	GLAD_pathway	PGRP-SD,	29	1	0.214574
signaling pathway	LM2	Toll pathway	GLAD_pathway	Myd88,	29	1	0.660201
signaling pathway	CC1	Toll pathway	GLAD_pathway	cact,mnd,	29	2	0.0732899
signaling pathway	PM11	Toll pathway	GLAD_pathway	Dif,	29	1	0.33167
signaling pathway	non-hemo	Toll pathway	GLAD_pathway	ea,mnd,Tollo,dl,	29	4	0.382838
signaling pathway	PM3	Toll pathway	GLAD_pathway	cact,PGRP-SA,	29	2	0.0177518
signaling pathway	CC2	Toll pathway	GLAD_pathway	cact,	29	1	0.207979
signaling pathway	PM6	WNT signaling pathway	GLAD_pathway	sgg,	27	1	0.384297
signaling pathway	LM2	WNT signaling pathway	GLAD_pathway	sgg,Apc,dally,	27	3	0.0740034
signaling pathway	PM11	WNT signaling pathway	GLAD_pathway	sgg,dally,	27	2	0.052973
signaling pathway	non-hemo	WNT signaling pathway	GLAD_pathway	arm,arr,fz,nkd,boca,CkIalpha,fz2,Axn,lgs,dlp,pan,nej,dally,	27	13	1.18885e-06
metabolic pathway	PM6	Amino Acid Metabolism	KEGG	Sam-S,Nc73EF,CG11236,	189	3	0.656972
metabolic pathway	PM7	Amino Acid Metabolism	KEGG	CG11236,	189	1	0.794688
metabolic pathway	LM2	Amino Acid Metabolism	KEGG	Gdh,CG9149,CG9674,SpdS,PPO3,	189	5	0.82451
metabolic pathway	PM10	Amino Acid Metabolism	KEGG	Cat,Got2,Gs1,Pglym78,LKRSDH,Plod,CG9674,Gabat,P5CDh1,	189	9	0.00119591
metabolic pathway	CC1	Amino Acid Metabolism	KEGG	Sam-S,Ahcy,PPO1,	189	3	0.560791
metabolic pathway	PM11	Amino Acid Metabolism	KEGG	trx,CG6287,yip2,	189	3	0.485019
metabolic pathway	PM12	Amino Acid Metabolism	KEGG	Plod,CG12279,PH4alphaEFB,CG31075,	189	4	0.623364
metabolic pathway	non-hemo	Amino Acid Metabolism	KEGG	slgA,trx,Sam-S,ash1,Hmt4-20,Gfat1,Cbs,CG6287,CG9674,P5CDh1,SpdS,CG4860,Set1,G9a,egg,gpp,	189	16	0.878195
metabolic pathway	LM1	Amino Acid Metabolism	KEGG	Gdh,PPO3,	189	2	0.696223
metabolic pathway	PM5	Amino Acid Metabolism	KEGG	Cat,AdSS,yip2,	189	3	0.307962
metabolic pathway	CC2	Amino Acid Metabolism	KEGG	aay,CG10621,PPO1,	189	3	0.192816
metabolic pathway	PM8	Amino Acid Metabolism	KEGG	Prx2540-2,Prx2540-1,	189	2	0.0266635
metabolic pathway	PM9	Amino Acid Metabolism	KEGG	Gs1,	189	1	0.862084
metabolic pathway	PM6	Carbohydrate Metabolism	KEGG	Gapdh2,Nc73EF,IP3K1,CG6767,IP3K2,	287	5	0.581302
metabolic pathway	PM7	Carbohydrate Metabolism	KEGG	IP3K1,IP3K2,	287	2	0.691137
metabolic pathway	LM2	Carbohydrate Metabolism	KEGG	Gapdh2,Treh,Ipp,ppl,Pis,Glo1,CG15117,Synj,CG9149,nst,Pmm2,CG9391,Tpi,	287	13	0.250866
metabolic pathway	PM10	Carbohydrate Metabolism	KEGG	Cat,Eno,Gal,Gapdh1,Gapdh2,Gs1,Hex-A,Pgi,PyK,GlyP,Pglym78,Irp-1B,UGP,Gabat,Tpi,Pgk,	287	16	2.15632e-06
metabolic pathway	CC1	Carbohydrate Metabolism	KEGG	Men,Gip,CG8036,	287	3	0.823283
metabolic pathway	PM11	Carbohydrate Metabolism	KEGG	Gapdh1,Gapdh2,Idh,Tpi,IP3K2,	287	5	0.362479
metabolic pathway	PM12	Carbohydrate Metabolism	KEGG	Eno,Gal,Irp-1B,Inos,Acyp2,Hexo2,CG31075,	287	7	0.474922
metabolic pathway	non-hemo	Carbohydrate Metabolism	KEGG	Gapdh2,Hex-A,kkv,Pten,Gfat1,Glo1,CG6767,CG4860,PIP4K,Ect3,norpA,Cht6,	287	12	0.999986
metabolic pathway	PM2	Carbohydrate Metabolism	KEGG	CG10863,	287	1	0.516086
metabolic pathway	LM1	Carbohydrate Metabolism	KEGG	CG9436,	287	1	0.975539
metabolic pathway	PM3	Carbohydrate Metabolism	KEGG	IP3K1,	287	1	0.872275
metabolic pathway	PM5	Carbohydrate Metabolism	KEGG	Cat,Eno,Gapdh2,	287	3	0.569324
metabolic pathway	CC2	Carbohydrate Metabolism	KEGG	Men,Plc21C,Pgd,Gip,CG17065,fbp,CG10467,IP3K2,	287	8	0.00213529
metabolic pathway	PM8	Carbohydrate Metabolism	KEGG	Inos,	287	1	0.325514
metabolic pathway	PM9	Carbohydrate Metabolism	KEGG	Gs1,PyK,mmy,	287	3	0.574032
metabolic pathway	PM7	Energy Metabolism	KEGG	Vha16-1,	131	1	0.665482
metabolic pathway	LM2	Energy Metabolism	KEGG	Vha36-1,Vha13,VhaM9.7-b,Vha44,Vha14-1,Vha68-2,	131	6	0.34481
metabolic pathway	PM10	Energy Metabolism	KEGG	ATPsynB,COX6B,COX7C,	131	3	0.267801
metabolic pathway	CC1	Energy Metabolism	KEGG	ND-B16.6,UQCR-6.4,COX8,	131	3	0.329091
metabolic pathway	PM12	Energy Metabolism	KEGG	ND-B17,ATPsynbeta,ATPsynG,ox,ND-ACP,ND-SGDH,sun,cype,ATPsynCF6,ATPsynD,ATPsynO,COX5A,ATPsynB,ATPsyngamma,ND-PDSW,ATPsyndelta,UQCR-14,COX6B,ND-B14.5B,COX5B,ND-B15,UQCR-6.4,ND-B12,ATPsynF,UQCR-Q,COX7C,ND-13B,ND-MLRQ,ND-MWFE,COX8,ND-30,	131	31	1.82077e-14
metabolic pathway	non-hemo	Energy Metabolism	KEGG	ND-MNLL,ND-20,ATPsynC,	131	3	0.999957
metabolic pathway	PM2	Energy Metabolism	KEGG	UQCR-6.4,COX8,	131	2	0.0422884
metabolic pathway	PM5	Energy Metabolism	KEGG	CG9065,	131	1	0.743536
metabolic pathway	PM9	Energy Metabolism	KEGG	ATPsynbeta,ND-75,ND-23,COX5A,ATPsyngamma,ND-PDSW,COX6B,COX4,	131	8	6.45671e-05
metabolic pathway	LM2	Glycan Biosynthesis and Metabolism	KEGG	sfl,CG5613,CG15117,	165	3	0.943267
metabolic pathway	PM10	Glycan Biosynthesis and Metabolism	KEGG	Gal,	165	1	0.898942
metabolic pathway	CC1	Glycan Biosynthesis and Metabolism	KEGG	LManII,alpha-Man-Ia,	165	2	0.72617
metabolic pathway	PM12	Glycan Biosynthesis and Metabolism	KEGG	Gal,C1GalTA,LManI,Hexo2,CG33977,rumi,	165	6	0.171877
metabolic pathway	non-hemo	Glycan Biosynthesis and Metabolism	KEGG	rt,fng,sfl,shams,rumi,Ect3,	165	6	0.999797
metabolic pathway	PM9	Glycan Biosynthesis and Metabolism	KEGG	LManII,	165	1	0.822367
metabolic pathway	PM6	Lipid Metabolism	KEGG	Lis-1,CG8112,	170	2	0.808809
metabolic pathway	LM2	Lipid Metabolism	KEGG	ifc,wun,nes,Pis,CG17544,CG9149,iPLA2-VIA,CG11426,CG10425,schlank,wun2,Dgk,Spt-I,	170	13	0.00952258
metabolic pathway	PM10	Lipid Metabolism	KEGG	Gal,CG3961,Lpin,	170	3	0.413396
metabolic pathway	CC1	Lipid Metabolism	KEGG	Pect,CG10602,laza,	170	3	0.489437
metabolic pathway	PM11	Lipid Metabolism	KEGG	yip2,CG18815,	170	2	0.683003
metabolic pathway	PM12	Lipid Metabolism	KEGG	Gal,Gk1,CG3961,CDase,CG31075,	170	5	0.341188
metabolic pathway	non-hemo	Lipid Metabolism	KEGG	Lis-1,wun,Paf-AHalpha,mri,CG4860,CG18815,Desat1,Ect3,Lpin,	170	9	0.996144
metabolic pathway	PM2	Lipid Metabolism	KEGG	CG10863,	170	1	0.34827
metabolic pathway	LM1	Lipid Metabolism	KEGG	ifc,CG9436,schlank,wun2,	170	4	0.171056
metabolic pathway	PM5	Lipid Metabolism	KEGG	PHGPx,yip2,	170	2	0.524245
metabolic pathway	CC2	Lipid Metabolism	KEGG	CG10602,bbc,laza,Lpin,	170	4	0.0475339
metabolic pathway	PM8	Lipid Metabolism	KEGG	CG3961,	170	1	0.207273
metabolic pathway	PM9	Lipid Metabolism	KEGG	FASN1,CG3961,	170	2	0.527967
metabolic pathway	PM6	Metabolism of Cofactors and Vitamins	KEGG	Nmdmc,	139	1	0.918484
metabolic pathway	PM7	Metabolism of Cofactors and Vitamins	KEGG	Pdxk,	139	1	0.687226
metabolic pathway	LM2	Metabolism of Cofactors and Vitamins	KEGG	CG15117,Dhpr,PPO3,	139	3	0.887169
metabolic pathway	PM10	Metabolism of Cofactors and Vitamins	KEGG	Pdxk,	139	1	0.854716
metabolic pathway	CC1	Metabolism of Cofactors and Vitamins	KEGG	CG5828,CG11089,PPO1,	139	3	0.362861
metabolic pathway	PM11	Metabolism of Cofactors and Vitamins	KEGG	Fer1HCH,CG9451,	139	2	0.573913
metabolic pathway	PM12	Metabolism of Cofactors and Vitamins	KEGG	Fer1HCH,CG44242,	139	2	0.826551
metabolic pathway	non-hemo	Metabolism of Cofactors and Vitamins	KEGG	Sptr,CG9265,Dhpr,CG11089,	139	4	0.999886
metabolic pathway	LM1	Metabolism of Cofactors and Vitamins	KEGG	PPO3,	139	1	0.832622
metabolic pathway	PM5	Metabolism of Cofactors and Vitamins	KEGG	Fer1HCH,CG32549,Mocs1,	139	3	0.172288
metabolic pathway	CC2	Metabolism of Cofactors and Vitamins	KEGG	CG2846,CG5828,CG6656,PPO1,	139	4	0.025366
metabolic pathway	PM9	Metabolism of Cofactors and Vitamins	KEGG	CG44243,	139	1	0.766452
metabolic pathway	PM6	Metabolism of folate and pterines	Reactome	CG8026,Nmdmc,	13	2	0.0215974
metabolic pathway	non-hemo	Metabolism of folate and pterines	Reactome	CG8026,	13	1	0.773351
metabolic pathway	PM6	Metabolism of Other Amino Acids	KEGG	GstD3,CG11236,Gclc,	94	3	0.234272
metabolic pathway	PM7	Metabolism of Other Amino Acids	KEGG	GstD3,CG11236,Gclc,	94	3	0.043151
metabolic pathway	LM2	Metabolism of Other Amino Acids	KEGG	Gdh,GstD1,SpdS,GstE2,	94	4	0.45044
metabolic pathway	PM10	Metabolism of Other Amino Acids	KEGG	RnrS,Gabat,	94	2	0.370364
metabolic pathway	CC1	Metabolism of Other Amino Acids	KEGG	GstE6,	94	1	0.769269
metabolic pathway	PM11	Metabolism of Other Amino Acids	KEGG	Dip-B,Idh,	94	2	0.372774
metabolic pathway	PM12	Metabolism of Other Amino Acids	KEGG	CG31075,	94	1	0.884693
metabolic pathway	non-hemo	Metabolism of Other Amino Acids	KEGG	GstS1,SpdS,CG4860,	94	3	0.99837
metabolic pathway	LM1	Metabolism of Other Amino Acids	KEGG	Gdh,	94	1	0.70086
metabolic pathway	PM3	Metabolism of Other Amino Acids	KEGG	Gclc,	94	1	0.487938
metabolic pathway	PM5	Metabolism of Other Amino Acids	KEGG	GstD1,GstD3,GstD5,GstE1,PHGPx,GstD9,Gclc,GstE9,GstE7,GstE6,GstE3,GstE2,	94	12	2.04921e-10
metabolic pathway	CC2	Metabolism of Other Amino Acids	KEGG	Pgd,GstE1,GstE3,	94	3	0.0395438
metabolic pathway	PM6	Nucleotide Metabolism	KEGG	awd,Ac76E,Adk2,CG6767,Adgf-A,	155	5	0.142866
metabolic pathway	LM2	Nucleotide Metabolism	KEGG	r-l,Adk1,Ac78C,Ady43A,Adgf-A,	155	5	0.672454
metabolic pathway	PM10	Nucleotide Metabolism	KEGG	dnc,PyK,RnrS,	155	3	0.357705
metabolic pathway	CC1	Nucleotide Metabolism	KEGG	Rpb5,Rpb8,CG11089,Pde1c,	155	4	0.21776
metabolic pathway	PM11	Nucleotide Metabolism	KEGG	dnc,	155	1	0.885096
metabolic pathway	PM12	Nucleotide Metabolism	KEGG	Rpb10,l(2)37Cg,	155	2	0.869572
metabolic pathway	non-hemo	Nucleotide Metabolism	KEGG	awd,RpII18,RpII215,RpII15,Pol32,Rpb11,Rpb5,CG6767,CG11089,Chrac-14,dUTPase,sdt,pyd,Ada2a,CG45071,	155	15	0.710438
metabolic pathway	LM1	Nucleotide Metabolism	KEGG	Ac78C,Adgf-A,	155	2	0.589189
metabolic pathway	PM4	Nucleotide Metabolism	KEGG	awd,	155	1	0.234646
metabolic pathway	PM5	Nucleotide Metabolism	KEGG	AdSS,CG32549,Rpb12,	155	3	0.214016
metabolic pathway	CC2	Nucleotide Metabolism	KEGG	Adk3,Pde1c,	155	2	0.352588
metabolic pathway	PM9	Nucleotide Metabolism	KEGG	PyK,	155	1	0.802638
metabolic pathway	PM6	Xenobiotics Biodegradation and Metabolism	KEGG	GstD3,	79	1	0.758701
metabolic pathway	PM7	Xenobiotics Biodegradation and Metabolism	KEGG	GstD3,	79	1	0.482706
metabolic pathway	LM2	Xenobiotics Biodegradation and Metabolism	KEGG	GstD1,r-l,CG15117,GstE2,	79	4	0.326073
metabolic pathway	CC1	Xenobiotics Biodegradation and Metabolism	KEGG	GstE6,	79	1	0.708239
metabolic pathway	non-hemo	Xenobiotics Biodegradation and Metabolism	KEGG	GstS1,	79	1	0.999882
metabolic pathway	PM5	Xenobiotics Biodegradation and Metabolism	KEGG	GstD1,GstD3,GstD5,GstE1,GstD9,GstE9,GstE7,GstE6,GstE3,GstE2,	79	10	7.61232e-09
metabolic pathway	CC2	Xenobiotics Biodegradation and Metabolism	KEGG	GstE1,GstE3,	79	2	0.131687
gene group	PM6	Autophagy-related	GLAD	sgg,nudC,GstO3,gish,Nedd4,	209	5	0.315162
gene group	LM2	Autophagy-related	GLAD	Cam,Galphai,Galphao,Khc,Ras85D,sgg,Ggamma1,Rab2,Rho1,cher,betaggt-I,CCT3,Rala,mbc,p38a,Rab6,Rab1,14-3-3epsilon,CCT2,Tao,Pmp70,galectin,Uvrag,Atg18b,Synj,GAPcenA,foxo,Atg8a,Atg1,Rab8,Ggamma30A,	209	31	2.57153e-11
gene group	PM10	Autophagy-related	GLAD	Galphao,Plod,Lon,eIF3a,Pgk,Ggamma30A,	209	6	0.0682206
gene group	CC1	Autophagy-related	GLAD	CCT3,nudC,ThrRS,CCT2,eIF3a,CG8036,	209	6	0.105074
gene group	PM11	Autophagy-related	GLAD	dre4,sgg,Pdk1,foxo,aPKC,	209	5	0.162551
gene group	PM12	Autophagy-related	GLAD	Chc,Ggamma1,ThrRS,Plod,CG4572,alc,aPKC,zip,	209	8	0.102941
gene group	non-hemo	Autophagy-related	GLAD	br,EcR,Galphai,dre4,pk,polo,Parp,Cdc37,Hel25E,Rpt2,Vang,14-3-3epsilon,Rpt6,emb,nudC,Pten,Gfat1,Cand1,Usp7,CG4332,SerRS,FANCI,MYPT-75D,Atg17,foxo,Mtl,SMC1,Atg8a,gish,Nedd4,Atg13,Cul3,grp,aPKC,sima,	209	35	0.0054814
gene group	PM2	Autophagy-related	GLAD	polo,	209	1	0.409676
gene group	LM1	Autophagy-related	GLAD	Cam,Galphai,Ras85D,Rho1,cher,Rab6,S6k,Rab1,14-3-3epsilon,Pmp70,Gp93,Ggamma30A,	209	12	1.47537e-05
gene group	PM4	Autophagy-related	GLAD	GstO3,	209	1	0.30322
gene group	PM5	Autophagy-related	GLAD	CG6512,Gp93,Lst8,	209	3	0.364261
gene group	PM9	Autophagy-related	GLAD	polo,CCT3,Lon,eIF3a,CCT7,alc,	209	6	0.021651
gene group	PM6	cell cycle	GLAD	LamC,nudC,	409	2	0.99498
gene group	PM7	cell cycle	GLAD	Ubi-p5E,Ubi-p5E,Ubi-p5E,	409	3	0.663206
gene group	LM2	cell cycle	GLAD	LamC,Rab1,Rab2,flw,Mbs,fzr,	409	6	0.99768
gene group	PM10	cell cycle	GLAD	endos,Lpin,	409	2	0.977779
gene group	CC1	cell cycle	GLAD	nudC,E2f1,E2f1,fzr,	409	4	0.880046
gene group	PM11	cell cycle	GLAD	Nipped-B,	409	1	0.996857
gene group	PM12	cell cycle	GLAD	rl,RpA-70,PI31,RpA-70,PI31,PI31,RpA-70,	409	7	0.823063
gene group	non-hemo	cell cycle	GLAD	ball,barr,Cdk1,Dd,endos,Lam,Lpin,Mtor,Ndc1,Nipped-B,nudC,Nup153,Nup62,pav,polo,Rae1,SMC1,SMC2,sub,Cdc6,Cdk2,Chrac-14,dpa,E2f1,Mcm10,Mcm3,Mcm5,Mcm6,Mcm7,RPA2,Cdc6,Cdk2,CG9588,Chrac-14,CycA,CycE,Dp,dpa,Mcm10,Mcm3,Mcm5,Mcm6,Mcm7,mip130,mip40,mnb,Prosalpha3,Prosalpha4,Prosalpha6,Prosbeta1,Prosbeta5,RPA2,Rpn10,Rpn11,Rpn2,Rpn5,Rpn9,Rpt2,Rpt6,Cdk1,Cdk2,CG9588,CycA,E2f1,emb,Mbs,polo,Prosalpha3,Prosalpha4…	409	110	1.90958e-14
gene group	PM2	cell cycle	GLAD	CycB,pav,polo,stg,CycB,polo,stg,stg,	409	8	5.83383e-06
gene group	LM1	cell cycle	GLAD	LamC,Rab1,flw,	409	3	0.896228
gene group	PM5	cell cycle	GLAD	Nipped-B,RpA-70,REG,RpA-70,Ubi-p5E,Ubi-p63E,REG,Ubi-p5E,Ubi-p63E,REG,RpA-70,Ubi-p5E,Ubi-p63E,	409	13	0.000307165
gene group	CC2	cell cycle	GLAD	Lpin,Ubi-p63E,Ubi-p63E,fzr,Ubi-p63E,	409	5	0.229779
gene group	PM9	cell cycle	GLAD	CycB,pav,polo,Mcm7,HDAC1,Mcm7,stg,Ubi-p63E,CycB,polo,stg,Ubi-p63E,Mcm7,stg,Ubi-p63E,	409	15	2.22369e-05
gene group	PM6	Chaperone and heat shock proteins	GLAD	Nlp,nudC,Hsc70Cb,CG11267,CG1890,stv,	148	6	0.0488988
gene group	PM7	Chaperone and heat shock proteins	GLAD	stv,	148	1	0.710017
gene group	LM2	Chaperone and heat shock proteins	GLAD	CCT5,CCT3,CCT2,Pfdn1,CCT4,mrj,Pfdn4,Pfdn6,Pfdn5,CG1890,	148	10	0.0447242
gene group	PM10	Chaperone and heat shock proteins	GLAD	Hsp23,Hsp26,Hsp27,Csp,Calr,Hsp70Aa,Hsp70Ab,Hsp70Ba,Hsp70Bb,Hsp70Bc,Hsp70Bbb,	148	11	6.04759e-06
gene group	CC1	Chaperone and heat shock proteins	GLAD	Hsc70-5,Hsf,Hsp23,Hsp26,Hsp68,Hsp83,CCT1,CCT5,Pfdn2,CCT3,Hsp60A,Nap1,nudC,Stip1,Hsc70Cb,CCT2,CG7556,CCT4,Tpr2,CG1416,CCT8,mrj,CG11267,Droj2,Hsc70-4,	148	25	3.10862e-14
gene group	PM11	Chaperone and heat shock proteins	GLAD	Hsp22,Hsp23,Hsp26,Hsp27,Hsp68,Hsp70Ba,Hsp70Bb,Hsp70Bc,CG14207,Hsp70Bbb,DnaJ-1,	148	11	6.3556e-06
gene group	PM12	Chaperone and heat shock proteins	GLAD	Hsp23,Hsp26,Hsp27,Hsp68,Hsp83,Calr,Hsp70Bc,CG12279,DnaJ-1,	148	9	0.00656522
gene group	non-hemo	Chaperone and heat shock proteins	GLAD	Hsf,Hsp27,Hsp83,Cdc37,Nlp,nudC,Hsc70Cb,HIP-R,CG3226,CG14207,Tpr2,CG7133,CG6693,stv,HIP,Hsc70-4,	148	16	0.535553
gene group	PM2	Chaperone and heat shock proteins	GLAD	Hsp68,Hsp70Bc,	148	2	0.0526274
gene group	LM1	Chaperone and heat shock proteins	GLAD	Pfdn1,Gp93,CG1890,	148	3	0.290945
gene group	PM4	Chaperone and heat shock proteins	GLAD	Hsp26,Hsp27,Hsp70Bc,	148	3	0.00199091
gene group	PM5	Chaperone and heat shock proteins	GLAD	Hsc70-3,P58IPK,Gp93,Hsc70-4,	148	4	0.0664798
gene group	CC2	Chaperone and heat shock proteins	GLAD	Hsp23,Hsp26,Hsp68,Hsp83,Hsp70Bc,Stip1,CG1416,Droj2,DnaJ-1,Hsc70-4,	148	10	2.8959e-07
gene group	PM9	Chaperone and heat shock proteins	GLAD	Hsp23,Hsp26,Hsp27,Hsp68,CCT1,CCT5,Hsp70Aa,Hsp70Ab,Hsp70Ba,Hsp70Bb,Hsp70Bc,CCT3,CCT7,Hsp70Bbb,	148	14	3.89588e-10
gene group	PM6	Cytoskeletal	GLAD	awd,bic,capu,l(2)gl,sgg,corto,Lis-1,loco,Mapmodulin,	461	9	0.435902
gene group	PM7	Cytoskeletal	GLAD	capu,loco,Fim,	461	3	0.740339
gene group	LM2	Cytoskeletal	GLAD	Act5C,Act42A,AnxB9,AnxB10,capu,Pka-C1,chic,Galphai,Galphao,Khc,egh,dlg1,Arpc1,Map205,sgg,sqh,alphaTub84B,alphaTub85E,betaTub60D,betaTub97EF,Klp98A,Vinc,Mlc-c,Mbs,Klc,Myo61F,cpb,tsr,Arp2,Arp1,Ank,CalpA,nuf,shot,cnn,Rho1,Sep2,bif,cher,mbc,Apc,Rab11,Rab6,Khc-73,14-3-3epsilon,sfl,loco,Abi,chb,Fim,trio,DAAM,Cortactin,cib,par-6,Eb1,Vps4,Ilk,pod1,Arpc5,Arpc4,Arpc2,cpa,Chd64,Hip1,twf,Sra-1,Myo28B1,LIMK1,…	461	84	1.66533e-15
gene group	PM10	Cytoskeletal	GLAD	Abl,Pka-C1,eEF1alpha1,ena,Galphao,Hsp23,sn,heph,Sep1,pnut,tral,beta-Spec,Pka-R1,Bsg,Zasp52,stai,	461	16	0.000620768
gene group	CC1	Cytoskeletal	GLAD	eEF1alpha1,Hsp23,kst,fry,lilli,Frl,	461	6	0.719831
gene group	PM11	Cytoskeletal	GLAD	Abl,capu,Hsp23,sgg,Gel,CLIP-190,AnxB11,Syn1,Jupiter,cnc,tau,	461	11	0.05468
gene group	PM12	Cytoskeletal	GLAD	eEF1alpha1,ena,Hsp23,sti,bt,Gel,cora,nuf,cindr,pod1,AnxB11,Nct,Plp,Msp300,zip,Svil,Frl,	461	17	0.0336209
gene group	non-hemo	Cytoskeletal	GLAD	arm,asp,awd,bic,BicD,by,Pka-C1,Cp190,ds,ed,Actn,ft,fz,Galphai,klar,dlg1,l(2)gl,sti,Lam,Map205,mago,ovo,sn,Btk29A,stau,sub,Tm1,alphaTub84B,alphaTub84D,betaTub56D,betaTub97EF,yrt,blow,Klp61F,ex,14-3-3zeta,Mbs,alpha-Cat,Map60,heph,jar,lark,pav,ctp,nuf,pnut,Mtor,glu,Lis-1,fz2,14-3-3epsilon,sfl,CLIP-190,Pkn,Pp4-19C,aurB,flfl,Crk,Bap55,mbt,siz,Rok,par-6,Sep5,RhoGAPp190,Pten,Eb1,jbug,Dlic,Arp8,Pez,borr,…	461	108	2.33147e-15
gene group	PM2	Cytoskeletal	GLAD	sti,ncd,Klp61F,Klp67A,bt,pav,aurB,cmet,scra,Ote,	461	10	1.19146e-07
gene group	LM1	Cytoskeletal	GLAD	Act5C,Act42A,AnxB9,chic,Galphai,klar,egh,Map205,alphaTub84B,alphaTub85E,betaTub56D,betaTub60D,Klp98A,Vinc,Myo61F,tsr,CalpA,nuf,Rho1,bif,cher,Rab11,Rab6,14-3-3epsilon,loco,Fim,Cortactin,cib,Eb1,Ilk,pod1,Arpc2,cpa,Chd64,twf,Jupiter,Arpc3B,Myo31DF,rhea,capt,Arp3,Frl,	461	42	9.65894e-15
gene group	PM3	Cytoskeletal	GLAD	AnxB9,capu,l(2)gl,spir,loco,trio,Myo31DF,	461	7	0.0448317
gene group	PM4	Cytoskeletal	GLAD	awd,	461	1	0.552582
gene group	PM5	Cytoskeletal	GLAD	spir,	461	1	0.992146
gene group	CC2	Cytoskeletal	GLAD	Hsp23,fry,	461	2	0.887783
gene group	PM9	Cytoskeletal	GLAD	Abl,eEF1alpha1,Hsp23,sti,ncd,Klp61F,Klp67A,Myo61F,Cdc42,pav,msps,cmet,Plp,scra,	461	14	0.000307281
gene group	PM1	Glycoproteins	GLAD	trol,	400	1	0.501565
gene group	PM6	Glycoproteins	GLAD	mys,Ance,Lip4,Adgf-A,CD98hc,CG5399,Tep4,rgn,	400	8	0.418661
gene group	PM7	Glycoproteins	GLAD	Ance,Idgf1,Spn88Ea,Lip4,CG5399,Tep4,Tep2,yellow-c,rgn,	400	9	0.00600775
gene group	LM2	Glycoproteins	GLAD	Gli,Treh,mew,mys,Gp150,Spn88Ea,CG15347,CG9917,CG15117,CG10359,Adgf-A,Indy,CD98hc,CG13654,CG14629,Tep2,Tret1-1,CG31195,rgn,mgl,wb,uex,dally,	400	23	0.0214159
gene group	PM10	Glycoproteins	GLAD	Sap-r,Gal,Glt,Ten-m,Tig,fat-spondin,l(1)G0289,nrv3,Plod,CG17839,kcc,LanB2,	400	12	0.00920636
gene group	CC1	Glycoproteins	GLAD	nrv1,LManII,CG7556,Nrg,	400	4	0.869174
gene group	PM11	Glycoproteins	GLAD	Glt,Fur1,Ance,cathD,Lip4,nrv3,Cirl,Dg,CG17839,Tep4,CG12163,mfas,dally,	400	13	0.00368546
gene group	PM12	Glycoproteins	GLAD	Gal,Glt,Ppn,Ten-m,Cys,Tig,Idgf1,Npc1a,fat-spondin,l(1)G0289,NimB4,cathD,Hml,regucalcin,CG4829,nAChRbeta3,CG5397,CG3246,CG8668,Pvr,LManI,nrv3,Plod,CG17839,CG9372,CG1092,CG4572,CDase,PH4alphaEFB,Nplp2,Hexo2,vir-1,CG33978,	400	33	1.29787e-10
gene group	non-hemo	Glycoproteins	GLAD	ed,fw,if,Gli,scb,shg,tsl,vn,uzip,18w,Ptp10D,emp,trn,Gp150,Nrx-IV,Msr-110,nrv2,sdk,PlexA,Eph,bark,uif,Tsp39D,Cirl,Sod3,CG8180,Dg,CG11961,CG13506,nahoda,Ctl1,crim,Tsf2,Cont,GILT1,EndoU,CG16791,Cad99C,l(1)G0469,yellow-c,dome,CG31195,CG33129,CG33978,crb,serp,rgn,mgl,bou,verm,wb,kug,nrm,Fas1,Cht6,dally,Tim17b,Nrg,sno,Mcr,	400	60	0.00509393
gene group	LM1	Glycoproteins	GLAD	mew,mys,CG15347,CG9917,Adgf-A,CG14629,rgn,	400	7	0.24755
gene group	PM3	Glycoproteins	GLAD	Idgf1,CG5399,rgn,	400	3	0.540852
gene group	PM4	Glycoproteins	GLAD	Ance,Lip4,Tep4,	400	3	0.0300321
gene group	PM5	Glycoproteins	GLAD	CG15347,Apoltp,Tim17b,	400	3	0.783892
gene group	CC2	Glycoproteins	GLAD	nrv1,CAH2,CG2915,Ance-4,	400	4	0.39827
gene group	PM8	Glycoproteins	GLAD	Glt,Tig,fat-spondin,NimB4,Hml,regucalcin,	400	6	1.03668e-05
gene group	PM9	Glycoproteins	GLAD	Ama,Sap-r,Glt,Ppn,Ten-m,Tig,fat-spondin,LManII,l(1)G0289,CG5888,Hml,nrv3,CG17839,CG3618,vir-1,Fas1,LanB2,	400	17	8.3024e-07
gene group	PM6	Major signaling pathways	GLAD	Jra,mnd,sd,sgg,shn,Su(dx),drk,mys,InR,Rel,vri,CAP,pirk,PGRP-LB,puc,RpS6,Ets21C,	334	17	0.000102003
gene group	PM7	Major signaling pathways	GLAD	Jra,Su(dx),Rac2,Rel,CAP,pirk,PGRP-SD,PGRP-LB,PGRP-SC2,puc,Ets21C,	334	11	0.000101966
gene group	LM2	Major signaling pathways	GLAD	flw,Jra,Ras85D,sgg,sqh,Pp1-87B,mew,aos,drk,mys,Mlc-c,Mbs,btl,msn,nmo,Rac2,Rho1,Shc,Apc,Flo1,DAAM,wdb,Myd88,Mmp2,CAP,pyr,yki,RhoGDI,foxo,upd3,Thor,dally,Ptp61F,	334	33	2.04556e-07
gene group	PM10	Major signaling pathways	GLAD	csw,mam,nmo,eIF4E1,Pdp1,	334	5	0.485166
gene group	CC1	Major signaling pathways	GLAD	cact,E(spl)m3-HLH,mam,E(spl)mbeta-HLH,mnd,N,InR,Pdp1,tyf,PGRP-LB,Myc,	334	11	0.0147385
gene group	PM11	Major signaling pathways	GLAD	Eip75B,ftz-f1,sgg,shn,ttk,Dif,Rel,kek1,Pdk1,CAP,pirk,PGRP-LB,foxo,Socs36E,Ilp6,puc,dally,slmb,	334	18	8.57408e-07
gene group	PM12	Major signaling pathways	GLAD	rl,ci,Hr78,kek1,Pvr,Nct,kuz,zip,	334	8	0.486428
gene group	non-hemo	Major signaling pathways	GLAD	aop,arm,arr,ben,Brd,bsk,CkIIbeta,Dl,dpp,ds,ea,EcR,Eip75B,ft,ftz-f1,fz,if,kay,dco,E(spl)m2-BFM,E(spl)m3-HLH,E(spl)m7-HLH,E(spl)malpha-BFM,E(spl)mbeta-HLH,E(spl)mdelta-HLH,E(spl)mgamma-HLH,mnd,neur,nkd,numb,pk,put,S,sd,shn,smo,Btk29A,Su(var)2-10,tkv,Egfr,tsh,ttk,ptc,vn,Pp1-87B,boca,mts,RasGAP1,aos,ex,drk,N,Su(H),ci,tws,Mbs,spi,Akt1,Gug,ken,fng,Mad,Med,nmo,CkIalpha,kek1,Vang,fz2,Dad,lolal,cyc,gbb,ty…	334	107	4.77396e-15
gene group	PM2	Major signaling pathways	GLAD	tum,	334	1	0.570942
gene group	LM1	Major signaling pathways	GLAD	flw,Jra,Ras85D,sd,mew,mys,Rac2,Rho1,S6k,Pvf2,Mmp2,pyr,RhoGDI,	334	13	0.000346499
gene group	PM3	Major signaling pathways	GLAD	cact,Jra,kay,E(spl)mbeta-HLH,Su(dx),RasGAP1,Rel,RhoL,PGRP-SA,Thor,	334	10	0.000124001
gene group	PM4	Major signaling pathways	GLAD	CAP,	334	1	0.440098
gene group	PM5	Major signaling pathways	GLAD	E(spl)mbeta-HLH,N,kek1,Pvf2,	334	4	0.450982
gene group	CC2	Major signaling pathways	GLAD	cact,E(spl)m3-HLH,E(spl)mbeta-HLH,N,tyf,	334	5	0.129785
gene group	PM9	Major signaling pathways	GLAD	Cdc42,eIF4E1,HDAC1,tum,	334	4	0.456255
gene group	PM6	Metabolic	GLAD	awd,Gapdh2,Ac76E,Sam-S,GstD3,Nmdmc,Nc73EF,InR,Lis-1,Adk2,CG11236,IP3K1,Lip4,CG6767,Adgf-A,CD98hc,CG8112,Npc2h,Gclc,CG3348,CG6006,kra,Baldspot,IP3K2,	1708	24	0.914081
gene group	PM7	Metabolic	GLAD	GstD3,teq,CG11236,IP3K1,Lip4,Gclc,CG3348,LpR2,CG6006,Pdxk,Baldspot,Vha16-1,IP3K2,	1708	13	0.670824
gene group	LM2	Metabolic	GLAD	Gapdh2,Gdh,GstD1,ifc,rdgB,r-l,Treh,wun,Ipp,qm,sfl,Vha36-1,Adk1,Ac78C,Ady43A,nes,Vha13,ppl,VhaM9.7-b,Sras,CG12065,Pis,eIF5,CG5613,Pmp70,CG1486,CG10383,CG17544,Glo1,CG15117,Synj,CG9149,Dhpr,iPLA2-VIA,nst,Pmm2,bmm,CG9674,Adgf-A,Indy,CG9391,CG11426,CG1208,CD98hc,CG9801,SpdS,CG10425,schlank,wun2,Tret1-1,GstE2,Dgk,CG34423,Tpi,Spt-I,Tdc1,Baldspot,inaE,PPO3,Thor,Vha44,Vha14-1,Vha68-2,CG17646,	1708	64	0.430501
gene group	PM10	Metabolic	GLAD	Cat,Sap-r,dnc,Eno,Gal,Gapdh1,Gapdh2,Got2,Gs1,Hex-A,Pgi,GlyP,Sdc,RnrS,Pglym78,eIF4E1,ATPsynB,Irp-1B,LKRSDH,Lsd-2,COX6B,UGP,Plod,CG9674,CG3961,Gabat,P5CDh1,COX7C,Pdxk,Tpi,fne,Pgk,elav,Lpin,PyK,	1708	35	0.00946583
gene group	CC1	Metabolic	GLAD	Men,CCT1,Sam-S,Gip,mt:ND2,mt:ND5,InR,Ahcy,eIF4G1,LManII,Shmt,ND-B16.6,CG5828,Pect,CG10602,Rpb5,UQCR-6.4,Rpb8,laza,srl,CG8036,CG11089,GstE6,alpha-Man-Ia,COX8,PPO1,	1708	26	0.560969
gene group	PM11	Metabolic	GLAD	Dip-B,dnc,Gapdh1,Gapdh2,Idh,ImpL2,Fer1HCH,Lk6,Pdk1,pdgy,Lip4,CG6287,CG1882,CG18135,CG9451,yip2,CG18815,Ilp6,Tpi,IP3K2,	1708	20	0.813586
gene group	PM12	Metabolic	GLAD	Eno,Gal,ND-B17,ATPsynbeta,ATPsynG,ox,Stt3B,ND-ACP,ND-SGDH,mt:CoIII,mt:ND2,sun,cype,Fer1HCH,ATPsynCF6,ATPsynD,ATPsynO,COX5A,ATPsynB,ATPsyngamma,ND-PDSW,eIF4G1,Npc1a,Irp-1B,Gk1,Inos,ATPsyndelta,Hml,CG12065,Lsd-2,UQCR-14,COX6B,Stt3A,ND-B14.5B,COX5B,C1GalTA,LManI,ND-B15,UQCR-6.4,Jheh2,ND-B12,Sesn,ATPsynF,Plod,UQCR-Q,CG3961,CG18135,Cyp9f2,CG12279,Acyp2,CDase,PH4alphaEFB,COX7C,Hexo2,ND-13B,CG31075,ND-M…	1708	67	3.84941e-06
gene group	non-hemo	Metabolic	GLAD	awd,Gapdh2,Hex-A,ImpL2,kkv,mod(mdg4),pim,rt,slgA,boca,Sam-S,PCNA,GstS1,Akt1,Sdc,emp,NAT1,fng,mt:Cyt-b,Sptr,Rpn10,Lis-1,wun,Lk6,sfl,dnk,melt,Hmt4-20,Paf-AHalpha,Pten,Gfat1,Pol32,Dd,Shmt,CG14434,ND-MNLL,Nadsyn,ND-20,eIF5,obst-A,Cbs,CG13690,Duox,CG11050,CG4968,CG6287,CG9265,Glo1,CG12129,Rpb5,Hen1,CG8306,CG8963,mri,CG12091,CG9004,PIG-B,CG4603,CG13676,Dhpr,CG6767,Aps,CG9674,P5CDh1,olf413,SpdS,CG4860,C…	1708	93	1
gene group	PM2	Metabolic	GLAD	CG10863,UQCR-6.4,COX8,	1708	3	0.817689
gene group	LM1	Metabolic	GLAD	Gdh,ifc,S6k,Ac78C,CG12065,Pmp70,CG9436,Adgf-A,CG3348,schlank,wun2,Baldspot,PPO3,CG17646,	1708	14	0.97644
gene group	PM3	Metabolic	GLAD	IP3K1,Gclc,CG6006,Thor,	1708	4	0.998689
gene group	PM4	Metabolic	GLAD	awd,Lip4,	1708	2	0.809332
gene group	PM5	Metabolic	GLAD	Cat,Eno,Gapdh2,GstD1,ImpL2,GstD3,GstD5,Fer1HCH,CaBP1,AdSS,CG9065,CG1882,GstE1,PHGPx,GstD9,yip2,Jafrac1,Gclc,CG3348,CG32549,GstE9,GstE7,GstE6,GstE3,GstE2,CG34423,Rpb12,Mocs1,	1708	28	0.00807904
gene group	CC2	Metabolic	GLAD	Men,Plc21C,Pgd,Gip,CG2846,aay,sut1,CG17065,CG5828,CG10602,CG10621,fbp,bbc,GstE1,CG10467,NijB,laza,CG6656,CG17109,Trx-2,Jafrac1,Adk3,CG32284,GstE3,Lpin,IP3K2,PPO1,	1708	27	0.000347288
gene group	PM8	Metabolic	GLAD	Inos,Hml,Prx2540-2,Prx2540-1,CG3961,Dad1,	1708	6	0.0217176
gene group	PM9	Metabolic	GLAD	Sap-r,Gs1,CCT1,ATPsynbeta,Sdc,eIF4E1,ND-75,ND-23,COX5A,ATPsyngamma,ND-PDSW,LManII,Hml,COX6B,Stt3A,COX4,CG6650,CG3961,mmy,alc,CG44243,PyK,FASN1,	1708	23	0.112314
gene group	PM1	Mitochondrial	GLAD	trol,	978	1	0.824391
gene group	PM6	Mitochondrial	GLAD	awd,Cyt-c-p,Gapdh2,His2Av,RpS3,Rm62,sesB,RpS14b,RpL7,RpL23,Nmdmc,Nc73EF,LamC,RpL18A,RpS18,RpS4,RpL11,RpL9,RpS3A,RpL14,Rack1,Adk2,Tim10,RpL21,CG8026,Swim,RpL12,RpL28,RpL18,CG11267,sea,RpS8,RpL6,Rtnl1,RpL30,RpS10b,RpS24,RpL27A,	978	38	4.04577e-06
gene group	PM7	Mitochondrial	GLAD	RpL9,CtsB1,Ubi-p5E,	978	3	0.989582
gene group	LM2	Mitochondrial	GLAD	Act5C,AnxB9,Cam,Gapdh2,Gdh,Gbeta13F,dlg1,Atpalpha,Treh,alphaTub84B,Rop,Rap1,Ggamma1,140up,LamC,tsr,Ank,shot,Rab2,Rho1,fax,Rab11,Rab7,Past1,14-3-3epsilon,Vha36-1,Flo1,Vha13,ppl,CG1532,CG5676,CG1648,CG9149,Chd64,Dhpr,QIL1,CG9231,CG11779,Rtnl1,Tpi,Lmpt,Vha44,Rab8,Vha68-2,Vamp7,	978	45	0.0633506
gene group	PM10	Mitochondrial	GLAD	Cat,Col4a1,Sap-r,eEF1alpha1,Eno,Gapdh1,Gapdh2,Gbeta13F,Got2,Gs1,Atpalpha,Pgi,Syt1,GlyP,Rap1,His3.3B,Calr,Cp1,fax,Pglym78,vkg,ATPsynB,l(2)k09913,LKRSDH,eEF1gamma,Vap33,COX6B,CG3961,Lon,Gabat,P5CDh1,fabp,COX7C,Tpi,beta-Spec,Pgk,kcc,Bsg,PyK,	978	39	1.09479e-09
gene group	CC1	Mitochondrial	GLAD	eEF1alpha1,Hsc70-5,Hsp68,Hsp83,Men,Gip,mt:ND2,mt:ND5,Hsp60A,Tom40,mEFTu1,Mpcp2,LManII,Shmt,ND-B16.6,bsf,CG10602,Tom7,UQCR-6.4,CG11267,Tom20,CG8036,CG31229,ttm50,CG42376,UQCR-11,cu,COX8,Cyt-b5,Nrg,Hsc70-4,	978	31	0.000100377
gene group	PM11	Mitochondrial	GLAD	Dip-B,Gapdh1,Gapdh2,Hsp22,Hsp68,Idh,ref(2)P,His4r,fax,Fer2LCH,Fer1HCH,pdgy,cathD,CG14207,MRP,IscU,yip2,CG18815,Tpi,CG12163,	978	20	0.0494965
gene group	PM12	Mitochondrial	GLAD	Chc,eEF1alpha1,Eno,Hsp68,Hsp83,ND-B17,Sod1,Rap1,Ggamma1,Calr,ATPsynbeta,RpL18A,ATPsynG,ox,ND-ACP,ND-SGDH,mt:CoIII,mt:ND2,His4r,fax,sun,cype,Fer1HCH,alpha-Est7,ATPsynCF6,ATPsynD,ATPsynO,COX5A,ATPsynB,ATPsyngamma,ND-PDSW,Gk1,HisRS,ATPsyndelta,cathD,Vap33,CG3566,regucalcin,CtsB1,UQCR-14,COX6B,ND-B14.5B,COX5B,Tom7,ND-B15,UQCR-6.4,ND-B12,ATPsynF,UQCR-Q,CG3961,mRpL19,CG4572,CG10877,CG5254,COX7C,CG7630,…	978	69	1.07692e-14
gene group	non-hemo	Mitochondrial	GLAD	awd,Actn,Gapdh2,His2Av,Hsp83,dlg1,Lam,Rm62,slgA,Tm1,alphaTub84B,alphaTub84D,betaTub56D,RpS14b,14-3-3zeta,GstS1,RpS13,RpL18A,RpS18,Phb2,RpS4,ctp,mt:Cyt-b,His4r,CG4278,fax,RpL9,nrv2,RpL14,14-3-3epsilon,Inx2,Tim9b,Tim10,Shmt,CG3226,ND-MNLL,ND-20,CG14207,mRpL48,uif,CG5676,CG6180,mRpL13,CG3420,CG8026,CG1648,P32,CG10527,YME1L,Tina-1,RpL28,RpL18,Dhpr,mRpL2,mRpL20,QIL1,mRpS26,Grx1,P5CDh1,sea,CG4860,mRpS1…	978	86	0.985496
gene group	PM2	Mitochondrial	GLAD	Hsp68,UQCR-6.4,UQCR-11,COX8,	978	4	0.226132
gene group	LM1	Mitochondrial	GLAD	Act5C,AnxB9,Cam,Cyt-c-p,Gdh,alphaTub84B,betaTub56D,LamC,tsr,Rho1,fax,Rab11,14-3-3epsilon,CG1648,Chd64,Gp93,	978	16	0.179807
gene group	PM3	Mitochondrial	GLAD	AnxB9,CG10527,sea,	978	3	0.97282
gene group	PM4	Mitochondrial	GLAD	awd,sesB,	978	2	0.507296
gene group	PM5	Mitochondrial	GLAD	Cat,Eno,Gapdh2,Hsc70-3,ref(2)P,bcn92,fax,Fer2LCH,Fer1HCH,CG2076,Tspo,MRP,CG2064,PHGPx,CG6512,CG12171,IscU,CG17327,Gp93,yip2,Jafrac1,GstT1,Ubi-p5E,Chchd2,Tim17b,Cyt-b5,Kr-h2,Hsc70-4,	978	28	6.24615e-07
gene group	CC2	Mitochondrial	GLAD	Hsp68,Hsp83,Men,Sod1,Gip,CG10602,Jafrac1,Adk3,CG33170,Hsc70-4,	978	10	0.25587
gene group	PM8	Mitochondrial	GLAD	regucalcin,CG3961,	978	2	0.386997
gene group	PM9	Mitochondrial	GLAD	Col4a1,Sap-r,eEF1alpha1,Gs1,Hsp68,Sod1,Rap1,His3.3B,ATPsynbeta,Cp1,fax,vkg,ND-75,ND-23,COX5A,ATPsyngamma,ND-PDSW,Mpcp2,LManII,eEF1gamma,Vap33,COX6B,COX4,CG3961,Lon,fabp,CG44243,PyK,FASN1,	978	29	2.11262e-07
gene group	PM6	Peroxisomal	GLAD	awd,mod,kraken,CG11236,CG6006,kis,	152	6	0.0543472
gene group	PM7	Peroxisomal	GLAD	CG11236,CG6006,	152	2	0.359613
gene group	LM2	Peroxisomal	GLAD	CG5704,Pmp70,CG17544,CG9149,SpdS,Vha44,	152	6	0.481511
gene group	PM10	Peroxisomal	GLAD	Cat,l(2)k09913,CG3961,Lon,	152	4	0.156299
gene group	CC1	Peroxisomal	GLAD	mod,	152	1	0.907112
gene group	PM11	Peroxisomal	GLAD	Idh,pdgy,CG1882,yip2,	152	4	0.158351
gene group	PM12	Peroxisomal	GLAD	Sod1,CG3961,	152	2	0.862334
gene group	non-hemo	Peroxisomal	GLAD	awd,mod,pav,qsm,CG8306,Best2,SpdS,CG4860,Fis1,Jafrac1,CG33671,kis,	152	12	0.905676
gene group	PM2	Peroxisomal	GLAD	pav,	152	1	0.317877
gene group	LM1	Peroxisomal	GLAD	Pmp70,	152	1	0.85852
gene group	PM3	Peroxisomal	GLAD	CG6006,	152	1	0.661948
gene group	PM4	Peroxisomal	GLAD	awd,	152	1	0.230653
gene group	PM5	Peroxisomal	GLAD	Cat,CG1882,yip2,Jafrac1,	152	4	0.0718125
gene group	CC2	Peroxisomal	GLAD	Sod1,Jafrac1,	152	2	0.343869
gene group	PM8	Peroxisomal	GLAD	CG3961,	152	1	0.187426
gene group	PM9	Peroxisomal	GLAD	Sod1,pav,CG3961,Lon,	152	4	0.0732557
gene group	PM6	Receptors	GLAD	mys,InR,loco,Swim,mthl6,Pak3,Tre1,Gprk2,	601	8	0.84374
gene group	PM7	Receptors	GLAD	loco,teq,Tre1,LpR2,Gprk2,	601	5	0.560437
gene group	LM2	Receptors	GLAD	Syb,mew,aos,mys,btl,Itgbn,msn,Syx1A,Rho1,loco,Or46a,Tsp42Ed,Tao,Sr-CIV,pes,ItgaPS4,mthl4,ItgaPS5,mthl2,Syx13,CG7497,AdoR,Pak3,Tre1,mgl,Gprk2,hppy,Vamp7,Syx7,	601	29	0.0764061
gene group	PM10	Receptors	GLAD	csw,Sdc,Syx1A,TM4SF,Slik,Gyc76C,	601	6	0.83771
gene group	CC1	Receptors	GLAD	N,Gip,InR,mthl10,CG31431,	601	5	0.95796
gene group	PM11	Receptors	GLAD	Eip75B,ftz-f1,trx,kek1,Smox,Tsp42Ed,Cirl,mthl7,Prestin,Ir40a,	601	10	0.316596
gene group	PM12	Receptors	GLAD	Sr-CI,Hr78,kek1,Npc1a,drpr,Tsp42Ee,Pvr,Slik,Nct,Vamp7,	601	10	0.878971
gene group	non-hemo	Receptors	GLAD	arr,Lar,ds,EcR,Eip75B,ft,ftz-f1,fw,fz,g,if,sas,mud,put,scb,shg,smo,tkv,Egfr,trx,ptc,18w,Ptp99A,Ptp10D,aos,N,otk,Sdc,emp,fra,Mad,Med,Nrx-IV,drl,kek1,fz2,Dad,emb,Cad96Ca,wit,PlexA,mbt,Smox,Eph,Tsp96F,mthl3,Tollo,SK,mthl1,bark,ihog,Tsp39D,Cirl,Toll-7,LBR,mthl9,DOR,Tsp66E,mthl5,plum,Tsp97E,dsd,boi,tai,dlp,dome,Ranbp16,crb,Gprk1,mgl,verm,kug,otk2,	601	73	0.151171
gene group	PM2	Receptors	GLAD	mud,	601	1	0.785107
gene group	LM1	Receptors	GLAD	Syb,mew,mys,Syx1A,Rho1,loco,Tsp42Ee,Sr-CIV,mthl4,ItgaPS5,mthl2,Tre1,Gprk2,	601	13	0.0432389
gene group	PM3	Receptors	GLAD	loco,PGRP-SA,CG12290,Pak3,Gprk2,	601	5	0.421058
gene group	PM4	Receptors	GLAD	mthl6,	601	1	0.651438
gene group	PM5	Receptors	GLAD	N,kek1,Tsp42Ed,Tspo,	601	4	0.871226
gene group	CC2	Receptors	GLAD	N,Gip,mthl10,CG31431,	601	4	0.714066
gene group	PM9	Receptors	GLAD	Ama,Sdc,Sr-CI,TM4SF,drpr,CG5888,ItgaPS5,Slik,	601	8	0.284394
gene group	PM6	RNA-binding	GLAD	RpS3,mod,Rm62,Su(var)205,RpL7,RpS18,RpS4,La,RpL11,hoip,RpL9,RpS20,yps,vig,Dbp80,eIF5B,NHP2,CG13096,CG9253,RpS11,CG8545,eIF3k,eRF1,CG6937,SF2,Nop60B,larp,bin3,lost,	577	29	4.41847e-07
gene group	PM7	RNA-binding	GLAD	RpL9,CG42259,	577	2	0.955225
gene group	LM2	RNA-binding	GLAD	RNaseX25,eIF5,Synj,Pof,Thor,Imp,	577	6	0.999981
gene group	PM10	RNA-binding	GLAD	eEF1alpha1,eEF2,eIF4A,swm,LanA,sm,Rb97D,bol,heph,eIF4E1,Irp-1B,eIF1A,eEF1gamma,mahe,eEF5,CG4612,CG10077,DCP2,Lon,eIF3a,Syp,shep,fne,elav,eIF4H1,Imp,mub,AGO1,Unr,cpo,Sxl,mbl,	577	32	1.22098e-11
gene group	CC1	RNA-binding	GLAD	eEF1alpha1,eEF2,mod,Fib,eIF2beta,caz,La,CG4038,hoip,peng,eIF4G1,vig,mEFTu1,eEF1beta,NHP2,CG13096,eEF1delta,bsf,CG9253,CG8545,eIF6,srl,eIF3a,Capr,CG32344,shep,Nop60B,LSm7,eIF4H1,bel,cpo,how,	577	32	2.88039e-10
gene group	PM11	RNA-binding	GLAD	sm,tra2,brat,apt,Nab2,Syp,AGO1,Unr,	577	8	0.544386
gene group	PM12	RNA-binding	GLAD	SmF,eEF1alpha1,LanA,pum,Top2,me31B,eIF2beta,caz,msi,eIF3h,eIF4G1,Irp-1B,x16,eEF1beta,CG2021,CG6610,Srp14,shep,LSm7,SNRPG,Msp300,bel,eIF2gamma,how,	577	24	0.00310425
gene group	non-hemo	RNA-binding	GLAD	BicD,SmF,Hrb98DE,mago,mle,mod,Rm62,snf,stau,Su(var)205,Su(var)2-10,Top2,nonA,Hrb87F,unk,Pep,me31B,B52,Hrb27C,ash1,U2af50,Pabp2,Rox8,Ssrp,brat,RpS18,TH1,NAT1,Ref1,l(3)07882,heph,RpS4,Rsf1,caz,La,lark,msi,Gem3,Rnp4F,Hel25E,Psi,hoip,RpL9,rin,hrg,smg,spen,snRNP-U1-70K,dbe,Rs1,yps,qkr58E-3,qkr58E-1,qkr54B,SmD3,fus,vig,Srp54,Dbp80,DIP1,TBPH,eIF5B,CG5808,x16,Fmr1,Spt6,NHP2,eIF3g1,Sas10,CG1677,mahe,Upf1,…	577	166	2.03171e-14
gene group	LM1	RNA-binding	GLAD	Pof,CG42259,	577	2	0.99535
gene group	PM3	RNA-binding	GLAD	Thor,	577	1	0.984727
gene group	PM4	RNA-binding	GLAD	NHP2,Nop60B,	577	2	0.26009
gene group	PM5	RNA-binding	GLAD	Ssrp,La,eIF6,CG8549,bin3,	577	5	0.713058
gene group	CC2	RNA-binding	GLAD	shep,cpo,how,	577	3	0.845898
gene group	PM9	RNA-binding	GLAD	eEF1alpha1,eEF2,eIF4A,LanA,eIF4E1,eIF3i,eIF1A,eIF3j,eEF1beta,eEF1gamma,eIF3b,eEF5,Lon,eIF3a,eIF3d1,eIF4H1,Unr,	577	17	9.83156e-05
gene group	PM1	Secreted proteins	GLAD	trol,	784	1	0.749493
gene group	PM6	Secreted proteins	GLAD	CecA1,CecA2,CecB,CecC,l(2)gl,Drs,Dro,Ance,Mtk,NimB1,Vago,CG10433,Swim,ITP,Mmp1,Adgf-A,PGRP-LB,CG3348,Tep4,IM18,Mp,	784	21	0.0401243
gene group	PM7	Secreted proteins	GLAD	CecA1,CecA2,CecB,CecC,Drs,Dro,Ance,AttA,Mtk,Idgf2,Idgf1,teq,DptB,Mmp1,PGRP-SD,PGRP-LB,AttD,CG3348,Tep4,Tep2,Tep1,AttB,PGRP-SC2,IM18,Mp,	784	25	4.34198e-09
gene group	LM2	Secreted proteins	GLAD	aos,RNaseX25,scaf,Mmp2,CG15117,Mmp1,Adgf-A,AdamTS-A,Tep2,Tep1,yellow-f,QC,upd3,plx,PPO3,dally,Ten-a,	784	17	0.994345
gene group	PM10	Secreted proteins	GLAD	Col4a1,Glt,LanA,Ten-m,Calr,Sdc,Tig,Pxn,SPARC,fat-spondin,CG3662,Plod,LanB2,	784	13	0.279592
gene group	CC1	Secreted proteins	GLAD	PPO2,PGRP-LB,Pde1c,	784	3	0.99965
gene group	PM11	Secreted proteins	GLAD	Glt,ImpL2,Gel,Ance,foi,ITP,CG18135,PGRP-LB,Tep4,Ilp6,IM18,mfas,dally,	784	13	0.285765
gene group	PM12	Secreted proteins	GLAD	Glt,LanA,Ppn,Ten-m,Cys,Calr,Gel,Tig,Pxn,Acer,Idgf1,SPARC,fat-spondin,NimB4,Hml,regucalcin,loh,Plod,CG18135,CDase,Nplp2,Hexo2,Urm1,NimB3,LanB1,	784	25	0.0530277
gene group	non-hemo	Secreted proteins	GLAD	Dl,dpp,ea,ImpL2,l(2)gl,shf,tsl,vn,aos,spi,Sdc,gbb,Idgf4,miple2,BthD,obst-A,beat-IIIc,Mmp2,Sod3,ITP,CG13676,Tsf2,olf413,mav,Cals,CG14132,rols,dlp,CG31997,serp,bou,verm,Cht6,dally,Ten-a,Mcr,	784	36	1
gene group	LM1	Secreted proteins	GLAD	CecA1,CecA2,CecB,CecC,Mmp2,Mmp1,Adgf-A,Gp93,CG3348,yellow-f,PPO3,	784	11	0.412731
gene group	PM3	Secreted proteins	GLAD	CecA1,CecA2,CecB,CecC,l(2)gl,Drs,Idgf6,Mtk,Idgf1,PGRP-SA,CG2444,Mmp1,Tep1,yellow-f,	784	14	0.00119691
gene group	PM4	Secreted proteins	GLAD	Ance,Tep4,IM18,	784	3	0.148388
gene group	PM5	Secreted proteins	GLAD	Hsc70-3,ImpL2,foi,Manf,Apoltp,Gp93,CG3348,IM18,	784	8	0.560941
gene group	CC2	Secreted proteins	GLAD	PPO2,CG32284,Pde1c,	784	3	0.954156
gene group	PM8	Secreted proteins	GLAD	Glt,Tig,Pxn,fat-spondin,NimB4,Hml,regucalcin,	784	7	4.6794e-05
gene group	PM9	Secreted proteins	GLAD	Col4a1,Glt,LanA,Ppn,Ten-m,Sdc,Tig,Pxn,SPARC,fat-spondin,miple2,Hml,LanB2,	784	13	0.0630789
gene group	PM6	Spliceosome	GLAD	Rm62,hoip,Rack1,yps,nop5,SF2,lost,	321	7	0.346094
gene group	LM2	Spliceosome	GLAD	Imp,	321	1	0.999994
gene group	PM10	Spliceosome	GLAD	eIF4A,swm,GlyP,Rb97D,heph,CG4612,mkg-p,Syp,CG33057,Imp,mub,Sxl,mbl,	321	13	0.000491267
gene group	CC1	Spliceosome	GLAD	caz,hoip,nop5,Sf3b3,Droj2,LSm7,how,Hsc70-4,	321	8	0.124374
gene group	PM11	Spliceosome	GLAD	tra2,CG9776,Syp,	321	3	0.823073
gene group	PM12	Spliceosome	GLAD	SmF,caz,dom,ubl,x16,CG6701,CG2021,CG6610,Rpb10,LSm7,SNRPG,how,	321	12	0.0619591
gene group	non-hemo	Spliceosome	GLAD	SmF,fl(2)d,Hrb98DE,mago,mle,Rm62,RpII18,RpII215,snf,nonA,Hrb87F,Pep,B52,fru,Hrb27C,RpII15,U2af50,Pabp2,Rox8,Parp,Ref1,heph,Rsf1,caz,lark,Cdc27,Hel25E,Psi,hoip,rin,hrg,smg,spen,snRNP-U1-70K,dom,yps,qkr58E-3,qkr58E-1,SmD3,fus,Srp54,Bin1,CG2685,nop5,SRPK,CG7028,CG5808,x16,icln,CG1677,Upf1,Rbp1-like,CG6227,CG3436,CG3542,Sf3b2,Phf5a,Caper,holn1,Rpb11,CG10333,Ars2,Dhx15,tsu,CG12343,CG11808,CG9344,ASPP,…	321	117	1.11022e-16
gene group	PM3	Spliceosome	GLAD	CG6701,	321	1	0.900194
gene group	PM5	Spliceosome	GLAD	REG,RtcB,Prp31,Archease,Hsc70-4,	321	5	0.23554
gene group	CC2	Spliceosome	GLAD	Droj2,how,Hsc70-4,	321	3	0.475733
gene group	PM9	Spliceosome	GLAD	eIF4A,	321	1	0.965986
gene group	PM6	Transcription factor/DNA binding	GLAD	bic,crc,Jra,mod,sd,shn,Su(var)205,zfh1,Psc,Ets21C,corto,La,Rel,chn,vri,Df31,yps,NK7.1,CG5953,CG6937,tara,gem,chinmo,Alh,Su(z)2,CrebB,CG45050,kis,Glut4EF,	1146	29	0.0339183
gene group	PM7	Transcription factor/DNA binding	GLAD	Jra,zfh1,Psc,Ets21C,Rel,chn,NK7.1,CG5953,Alh,tx,CG45050,Glut4EF,	1146	12	0.239758
gene group	LM2	Transcription factor/DNA binding	GLAD	Adf1,Jra,pnr,sqz,ppl,Debcl,CG10431,yki,foxo,CG10232,schlank,CG32264,Mrtf,rhea,Lmpt,CG9932,FoxP,cic,tx,	1146	19	0.999989
gene group	PM10	Transcription factor/DNA binding	GLAD	crp,Ubx,ush,lola,sbb,Pdp1,tna,mei-P26,jim,CG3328,luna,CG32264,Snoo,bun,CG42748,Unr,l(3)neo38,Smr,	1146	18	0.308375
gene group	CC1	Transcription factor/DNA binding	GLAD	cact,Hsf,lz,E(spl)m3-HLH,E(spl)mbeta-HLH,mod,peb,ct,N,caz,La,E2f1,klu,fry,Pdp1,JIL-1,tna,CG3847,CG6769,CG7556,CG18446,CG2199,CG10576,lilli,Myc,nclb,Glut4EF,	1146	27	0.0178512
gene group	PM11	Transcription factor/DNA binding	GLAD	Eip75B,ftz-f1,h,kn,shn,trx,ttk,CrebA,elB,lola,noc,brat,sbb,simj,Dif,Ssdp,Rel,Su(Tpl),apt,edl,Smox,jim,CG9776,Atf3,CG3726,CG5953,CG17385,foxo,ham,Nipped-A,Snoo,Antp,Xrp1,cnc,Unr,Smr,Glut4EF,	1146	37	8.34866e-07
gene group	PM12	Transcription factor/DNA binding	GLAD	brm,e(y)2,Ubx,ci,caz,Hr78,Ssb-c31a,TfIIEalpha,dom,spt4,CG12744,CG6701,Rpb10,CG31460,CoRest,psq,eIF2gamma,	1146	17	0.980035
gene group	non-hemo	Transcription factor/DNA binding	GLAD	Adf1,aop,Dll,bi,bic,br,Cp190,cg,eya,crc,D1,ea,E(bx),EcR,Eip75B,emc,E(Pc),exd,e(y)2,eyg,ft,ftz-f1,gro,h,H,Hsf,hth,kay,esg,crp,pho,lds,E(spl)m3-HLH,E(spl)m7-HLH,Met,E(spl)mbeta-HLH,E(spl)mdelta-HLH,E(spl)mgamma-HLH,mle,mod,mod(mdg4),ovo,sd,shn,skd,so,Sry-beta,su(Hw),Su(var)205,Su(var)2-10,Tbp,trx,tsh,ttk,vg,nonA,HmgD,Pep,N,fru,fs(1)h,Su(H),RpII15,elB,ci,sob,bowl,14-3-3zeta,TfIIB,ash1,ey,Psc,lola,Et…	1146	269	3.9968e-15
gene group	PM2	Transcription factor/DNA binding	GLAD	jumu,CG42232,	1146	2	0.792974
gene group	LM1	Transcription factor/DNA binding	GLAD	Adf1,Jra,sd,schlank,CG32264,rhea,Alh,CG9932,tx,	1146	9	0.960568
gene group	PM3	Transcription factor/DNA binding	GLAD	cact,Jra,kay,E(spl)mbeta-HLH,zfh1,Rel,chn,edl,CG6701,bun,Xrp1,Alh,CG9932,Glut4EF,	1146	14	0.0304922
gene group	PM4	Transcription factor/DNA binding	GLAD	ham,	1146	1	0.871447
gene group	PM5	Transcription factor/DNA binding	GLAD	crc,h,E(spl)mbeta-HLH,N,Ssrp,La,CG6769,Irbp18,Xrp1,mbf1,	1146	10	0.750828
gene group	CC2	Transcription factor/DNA binding	GLAD	cact,lz,E(spl)m3-HLH,E(spl)mbeta-HLH,peb,ct,N,klu,fry,tna,CG45050,Glut4EF,rgr,	1146	13	0.126514
gene group	PM9	Transcription factor/DNA binding	GLAD	Ubx,jumu,HDAC1,CG3328,luna,Snoo,CG42232,Unr,	1146	8	0.915077
gene group	PM6	Transporters	GLAD	mnd,sesB,JhI-21,Nhe3,CG8026,ZnT63C,CG8177,CG5535,sea,CG6006,spin,Irk1,	653	12	0.495967
gene group	PM7	Transporters	GLAD	ZnT63C,CG8177,CG6231,CG6006,Vha16-1,Nha2,	653	6	0.457644
gene group	LM2	Transporters	GLAD	AnxB9,AnxB10,Atpalpha,Drip,Vha36-1,Picot,Vha13,VhaM9.7-b,Debcl,CG4607,Clic,Pmp70,CG13384,Prip,CG11537,ZnT63C,Indy,CG1208,CG11779,CG6231,CG1607,Nhe2,Tret1-1,CG31729,Vha44,Vha14-1,Vha68-2,CG17646,Irk1,	653	29	0.159
gene group	PM10	Transporters	GLAD	kar,Atpalpha,ATPsynB,Atet,MFS3,nrv3,fabp,kcc,	653	8	0.677986
gene group	CC1	Transporters	GLAD	mnd,nrv1,Tom40,Mpcp2,Oatp30B,Prip,CG8468,RAF2,Tom20,CG31229,Ctr1A,Inx3,	653	12	0.308297
gene group	PM11	Transporters	GLAD	AnxB11,CG7627,MRP,nrv3,CG5535,Prestin,	653	6	0.891808
gene group	PM12	Transporters	GLAD	ATPsynbeta,sun,ATPsynD,ATPsynO,ATPsynB,ATPsyngamma,Npc1a,ATPsyndelta,NtR,AnxB11,nAChRbeta3,CG7627,nrv3,ClC-c,CG5254,CG30344,	653	16	0.40911
gene group	non-hemo	Transporters	GLAD	mnd,ptc,ogre,nrv2,Inx2,SK,CG3168,CG3036,CG33298,tomboy40,CG1598,CG8026,CG8468,bdg,Best2,Oatp74D,CG5535,sea,CG11069,ATPsynC,CG1607,CG31121,CG33970,NaPi-III,Tim17b,Inx3,	653	26	1
gene group	LM1	Transporters	GLAD	AnxB9,Clic,Pmp70,ZnT63C,path,ATP8B,Nhe2,CG17646,	653	8	0.593676
gene group	PM3	Transporters	GLAD	AnxB9,ZnT63C,CG8177,sea,CG6006,spin,	653	6	0.315384
gene group	PM4	Transporters	GLAD	sesB,	653	1	0.682521
gene group	PM5	Transporters	GLAD	Trp1,MRP,meigo,Tim17b,	653	4	0.908692
gene group	CC2	Transporters	GLAD	kar,Elk,nrv1,sut1,CG13743,path,Ctr1A,	653	7	0.267853
gene group	PM9	Transporters	GLAD	ATPsynbeta,ATPsyngamma,Mpcp2,nrv3,fabp,	653	5	0.812338
gene group	PM6	Ubiquitin-related	GLAD	Su(dx),RpS27A,Psc,CG7215,chinmo,vari,Nedd4,Alh,Su(z)2,	458	9	0.428273
gene group	PM7	Ubiquitin-related	GLAD	Su(dx),Psc,Alh,	458	3	0.736295
gene group	LM2	Ubiquitin-related	GLAD	Apc,CG17754,Usp12-46,ago,Bre1,Diap1,	458	6	0.99939
gene group	PM10	Ubiquitin-related	GLAD	lola,mei-P26,CG13917,mura,	458	4	0.87808
gene group	CC1	Ubiquitin-related	GLAD	CG32369,	458	1	0.999284
gene group	PM11	Ubiquitin-related	GLAD	trx,ttk,Ubc6,lola,CG3726,UbcE2H,CG10916,Socs36E,stx,slmb,	458	10	0.102167
gene group	PM12	Ubiquitin-related	GLAD	eIF3h,Nedd8,CG17059,psq,	458	4	0.993269
gene group	non-hemo	Ubiquitin-related	GLAD	ben,br,Cp190,E(bx),ec,mod(mdg4),mus201,neur,trx,ttk,Prosalpha4,fru,ash1,Psc,lola,faf,Prosbeta1,lwr,ken,Uch-L5,not,Rpn10,Ubc2,Ubc4,ari-1,Ppa,lig,lolal,CG2924,mei-P26,bip2,CG8677,Rad23,Ulp1,Rpn2,Rpn11,Uba2,Prosbeta5,Aos1,CG2247,Tango10,Usp7,CG8924,CG8188,CG15432,lid,CG7102,Nedd8,d4,CG10465,dmpd,Fbl6,tou,CG9003,Den1,MESR4,CG11275,rno,mri,CG13917,CG4603,Uev1A,velo,CG8209,UbcE2M,CG4080,upSET,CG7656,el…	458	96	7.75631e-11
gene group	LM1	Ubiquitin-related	GLAD	Diap1,Alh,	458	2	0.981663
gene group	PM3	Ubiquitin-related	GLAD	Su(dx),lqf,Keap1,vari,Diap1,Alh,	458	6	0.1057
gene group	PM5	Ubiquitin-related	GLAD	Ubi-p63E,Ubc6,REG,CG10916,ctrip,	458	5	0.51024
gene group	CC2	Ubiquitin-related	GLAD	Ubi-p63E,CG32369,	458	2	0.885566
gene group	PM9	Ubiquitin-related	GLAD	Ubi-p63E,	458	1	0.992158
